# Supplementary material for: Compilation of Henry's law constants (version 5.0.0-rc.0) for water as solvent
Source: Copernicus journal article supplement (doi:10.5194/egusphere-2023-1584), 2023-07-24

ref = 43; chem = hydrogen peroxide; casrn = 7722-84-1; r2 = 0.99971

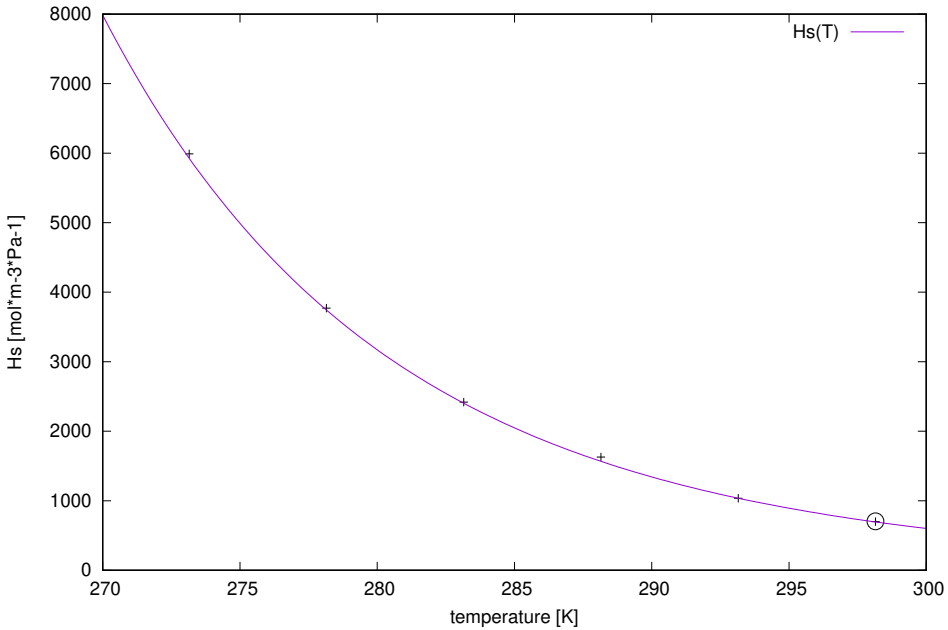

ref = 74; chem = nitrous acid; casrn = 7782-77-6; r2 = 0.99962

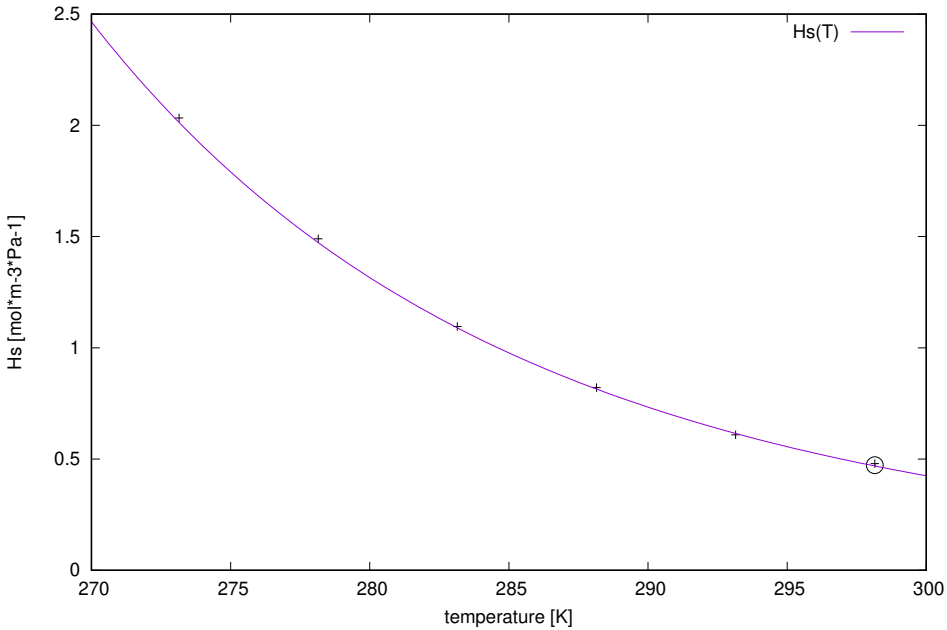

ref = 88; chem = nitrogen trioxide; casrn = 12033-49-7; r2 = 1.00000

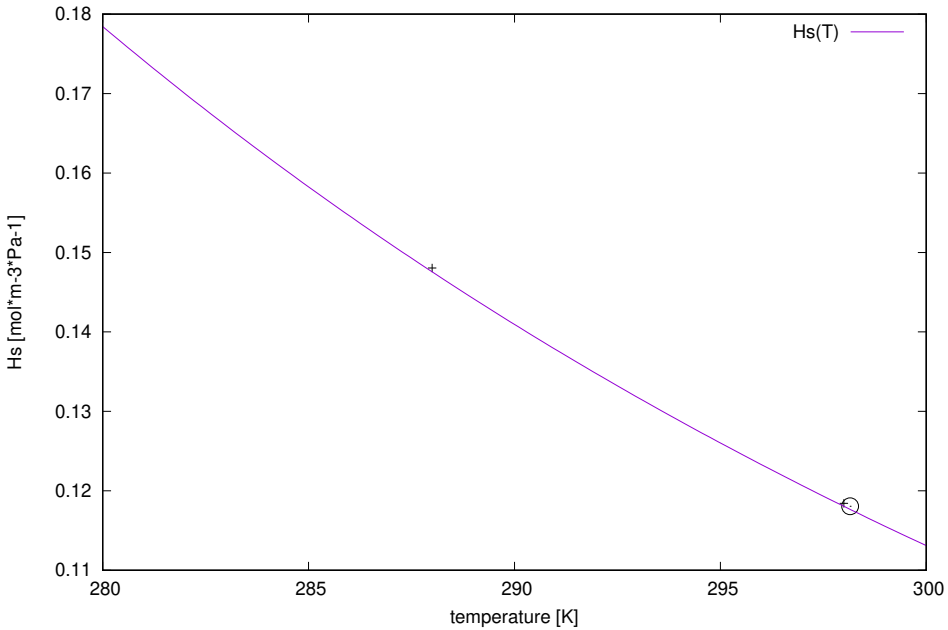

ref = 183; chem = hypochlorous acid; casrn = 7790-92-3; r2 = 1.00000

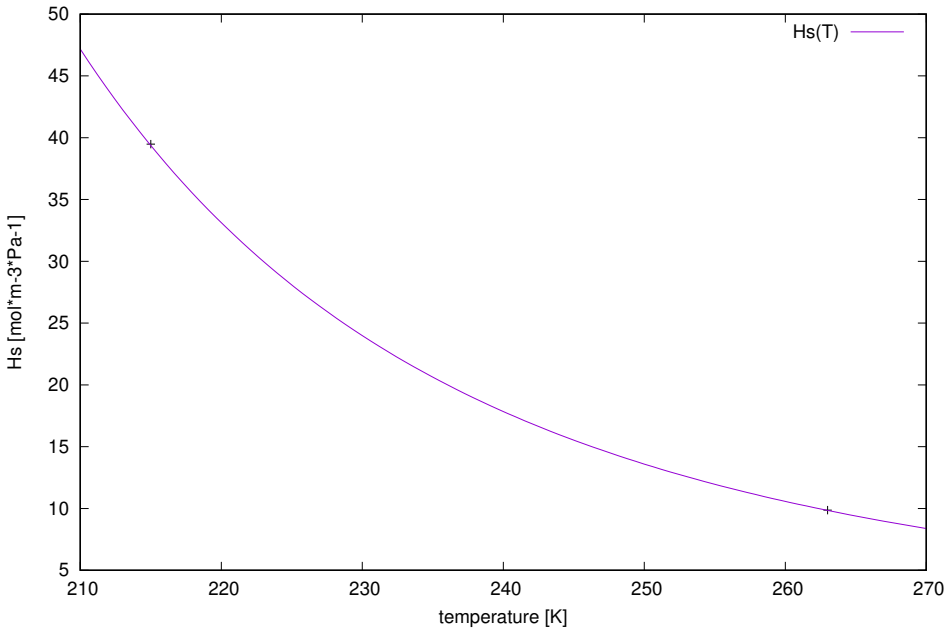

ref = 276; chem = hypobromous acid; casrn = 13517-11-8; r2 = 1.00000

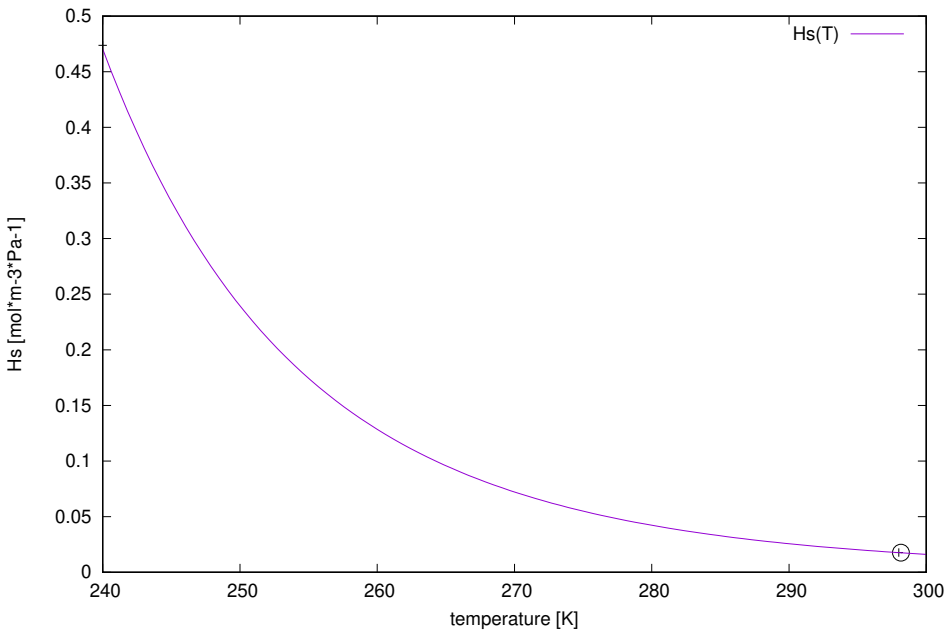

ref = 287; chem = nitrogen trichloride; casrn = 10025-85-1; r2 = 1.00000

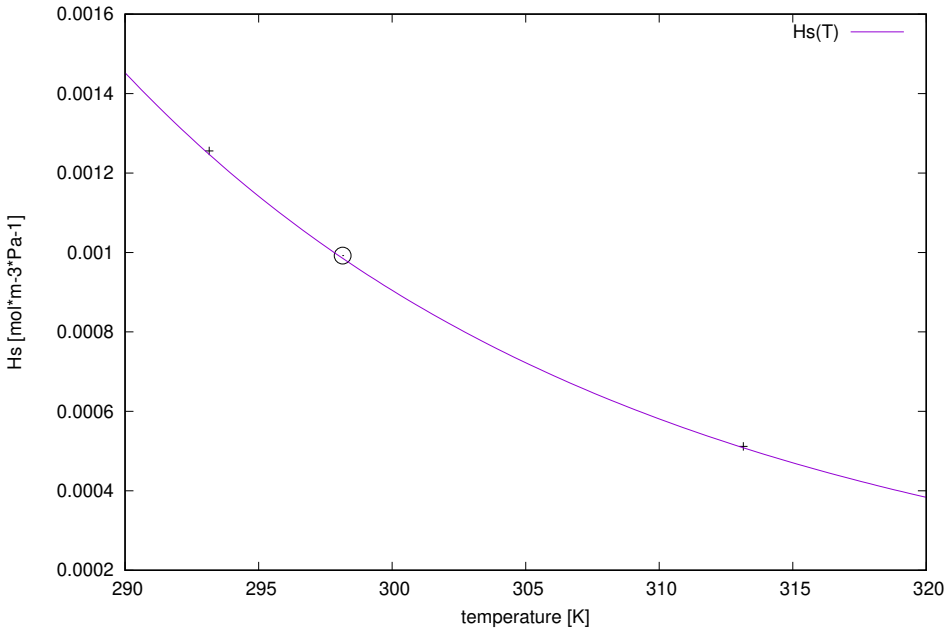

ref = 287; chem = chloramide; casrn = 10599-90-3; r2 = 1.00000

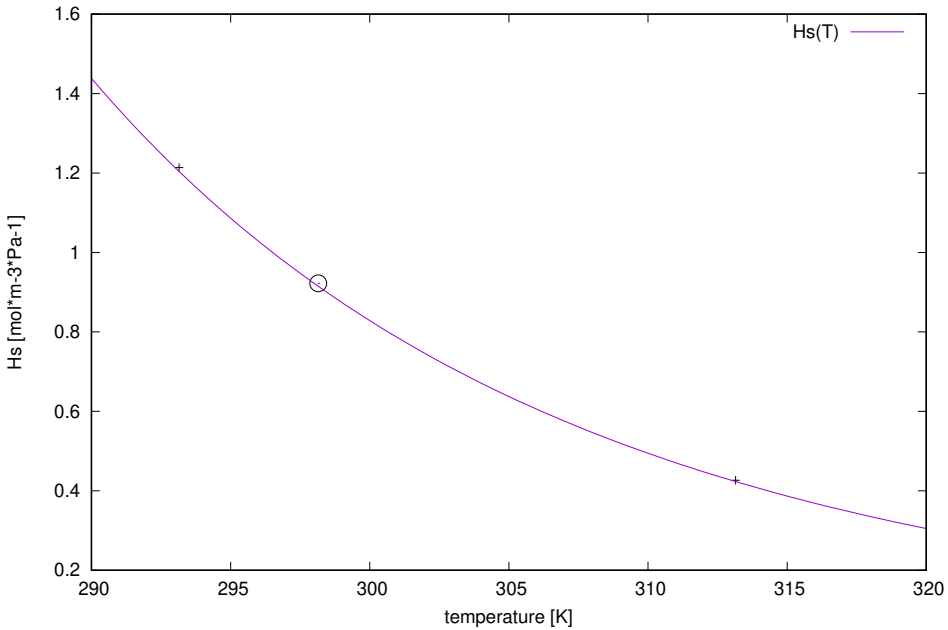

ref = 287; chem = dichloroamine; casrn = 3400-09-7; r2 = 1.00000

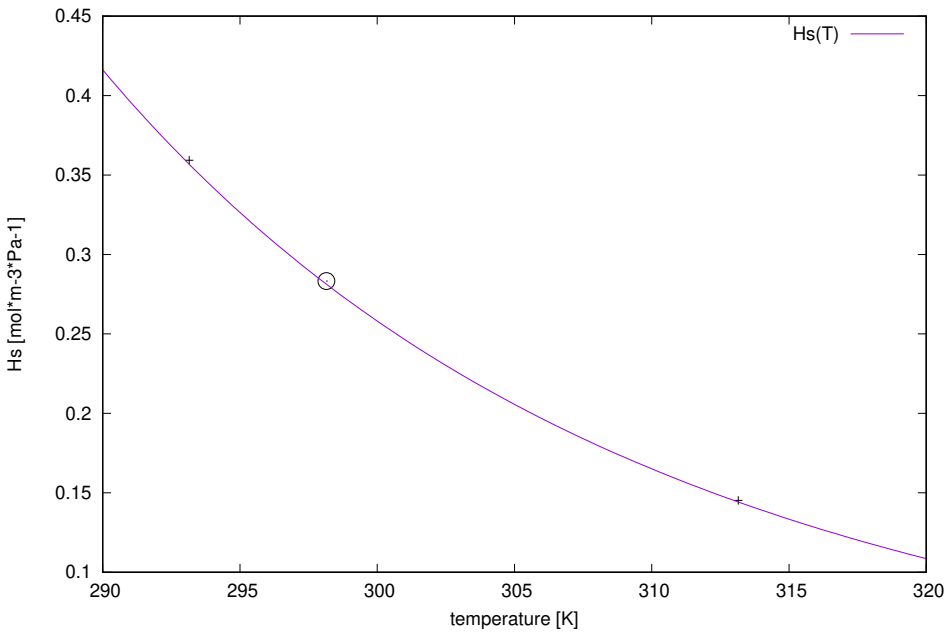



ref = 287; chem = hypochlorous acid; casrn = 7790-92-3; r2 = 1.00000

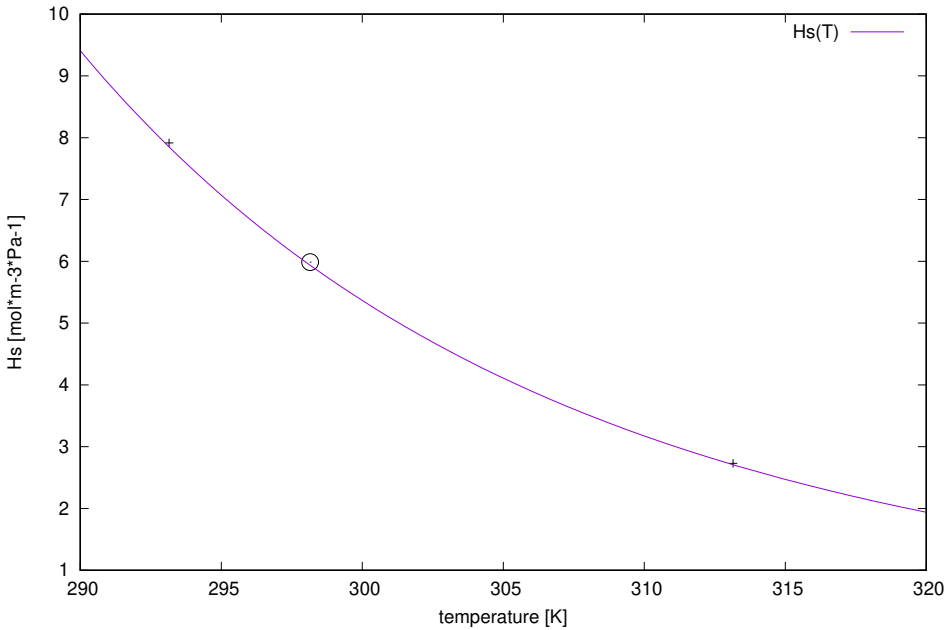

ref = 379; chem = dinitrogen monoxide; casrn = 10024-97-2; r2 = 1.00000

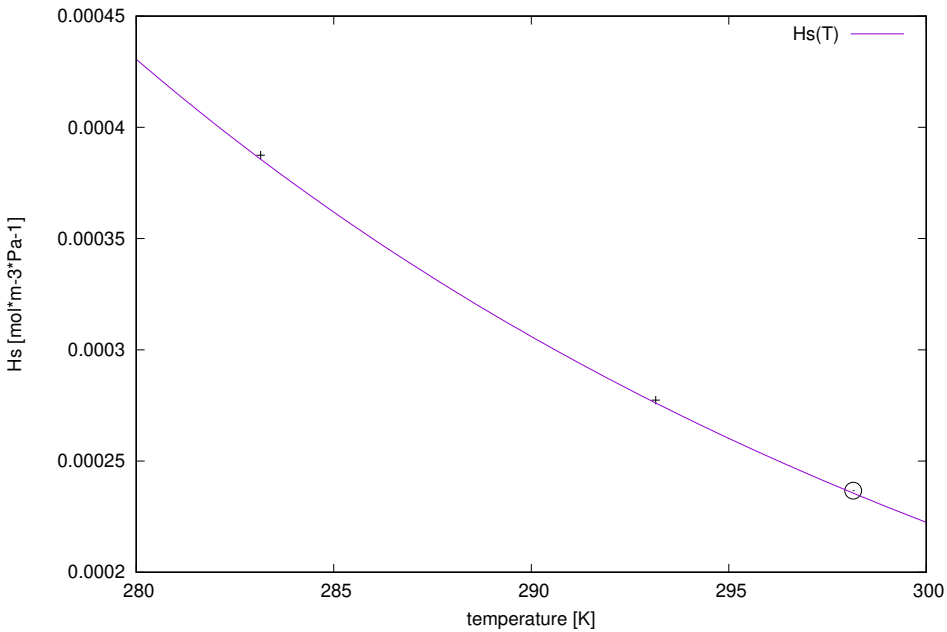

ref = 379; chem = hydrogen bromide; casrn = 10035-10-6; r2 = 0.99237

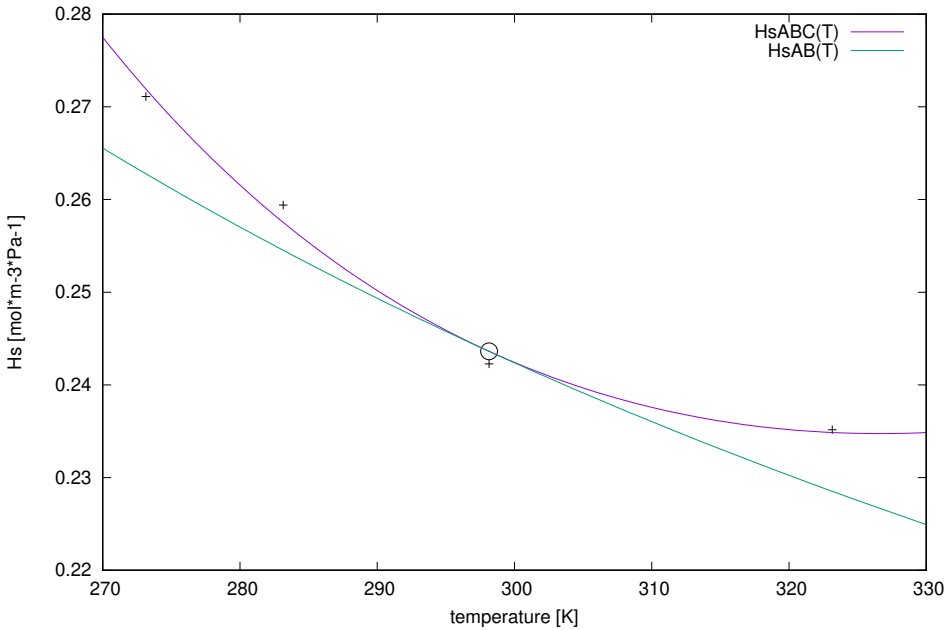

ref = 379; chem = radon; casrn = 10043-92-2; r2 = 0.99998

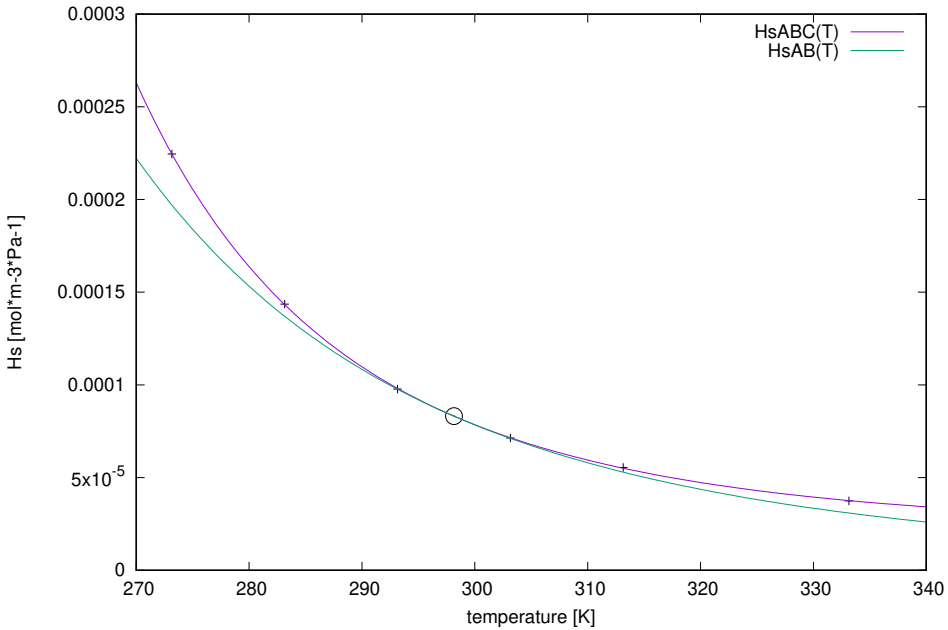

ref = 379; chem = nitrogen monoxide; casrn = 10102-43-9; r2 = 0.99972

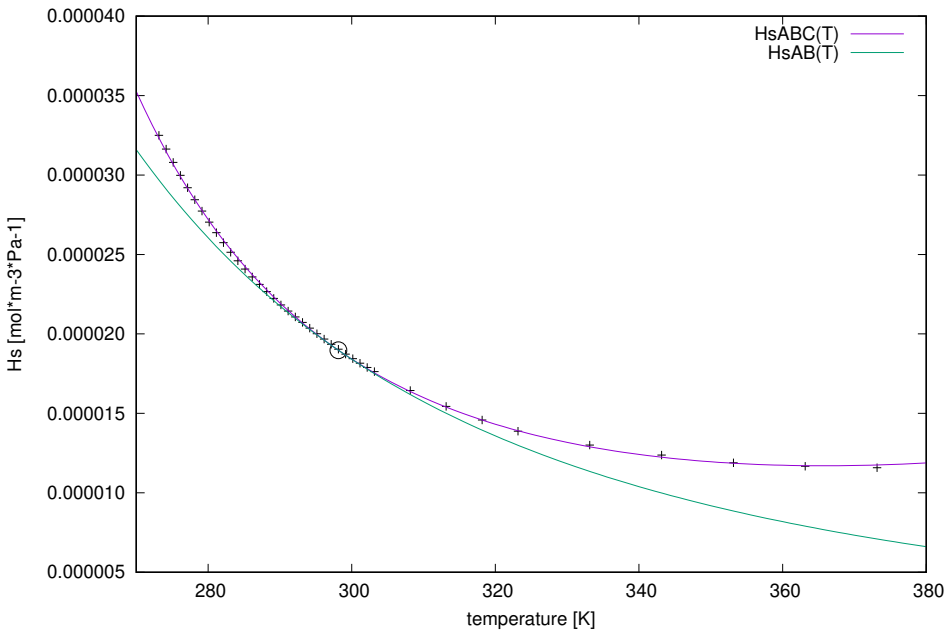

ref = 379; chem = carbon dioxide; casrn = 124-38-9; r2 = 0.99995

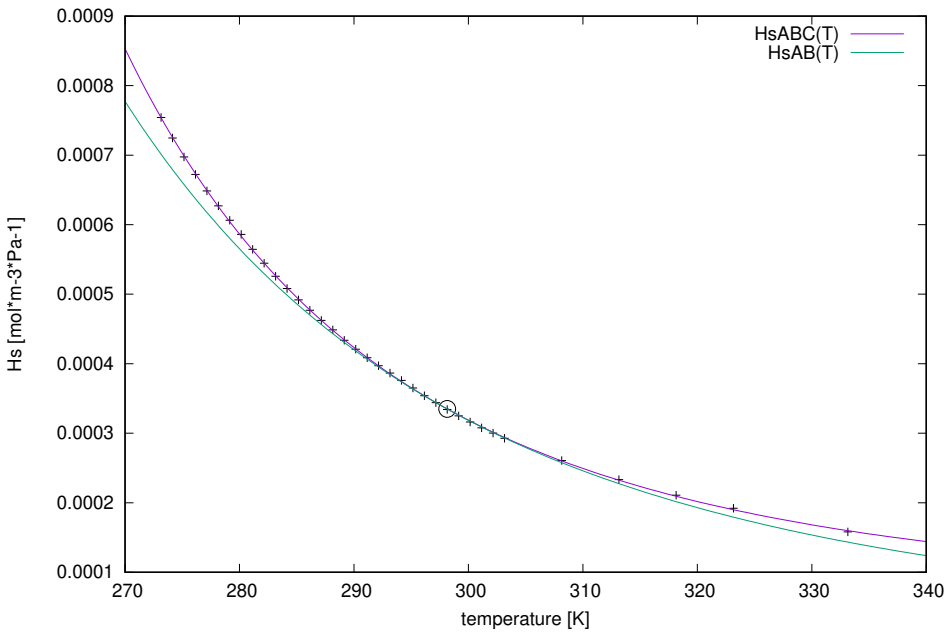

ref = 379; chem = hydrogen; casrn = 1333-74-0; r2 = 0.99855

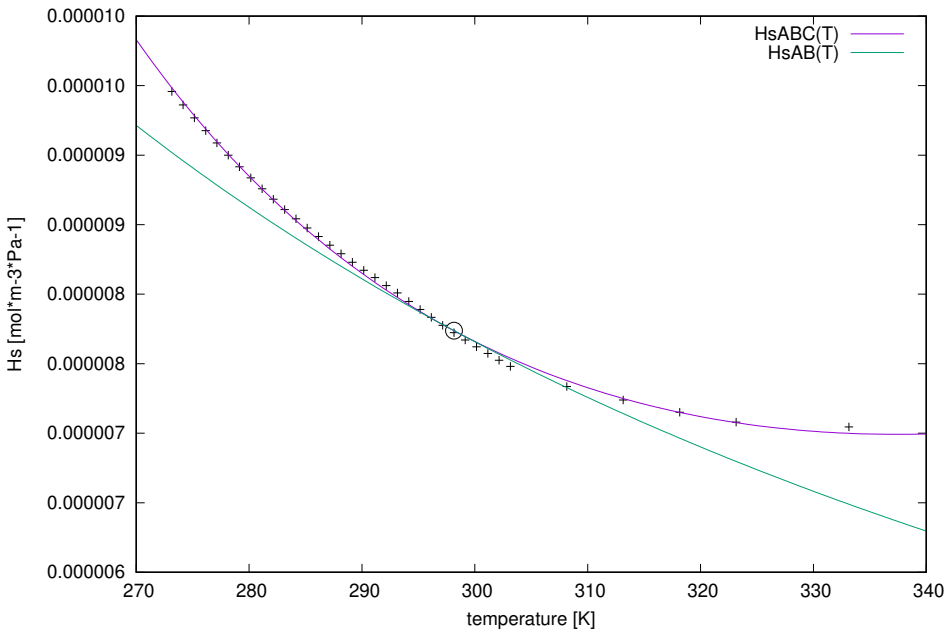

ref = 379; chem = carbon monoxide; casrn = 630-08-0; r2 = 0.99986

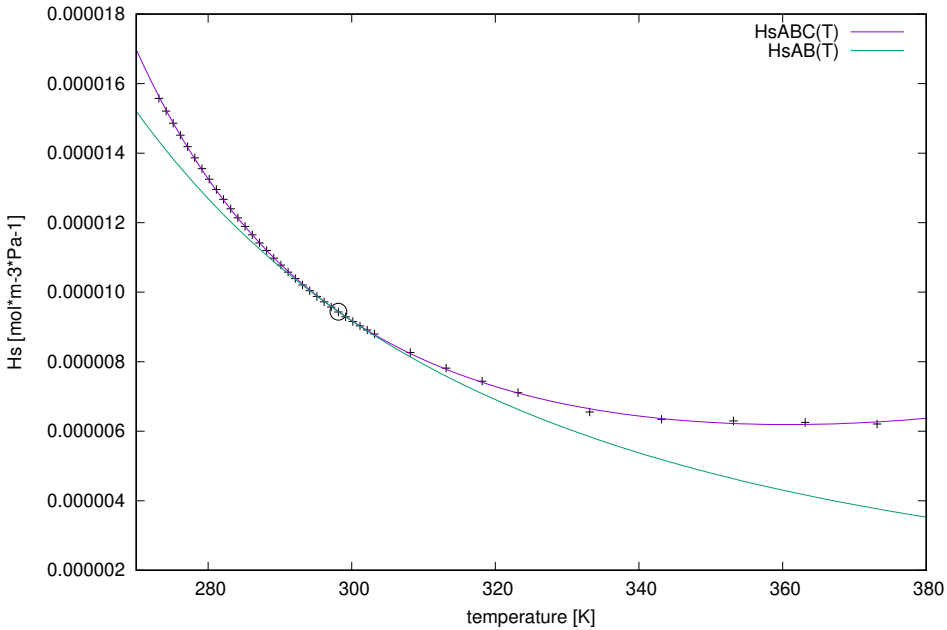



ref = 379; chem = methane; casrn = 74-82-8; r2 = 0.99982

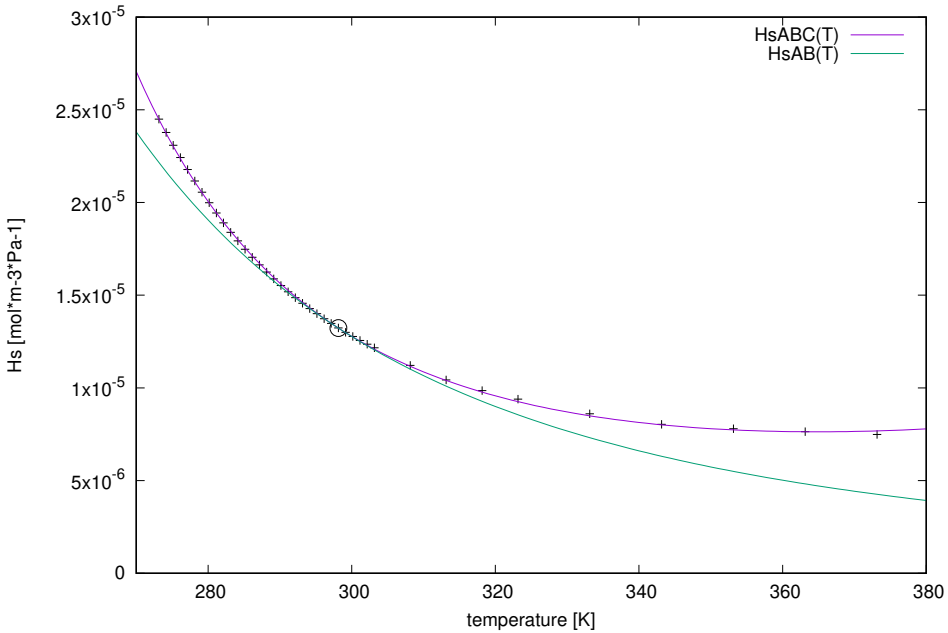

ref = 379; chem = ethane; casrn = 74-84-0; r2 = 0.99985

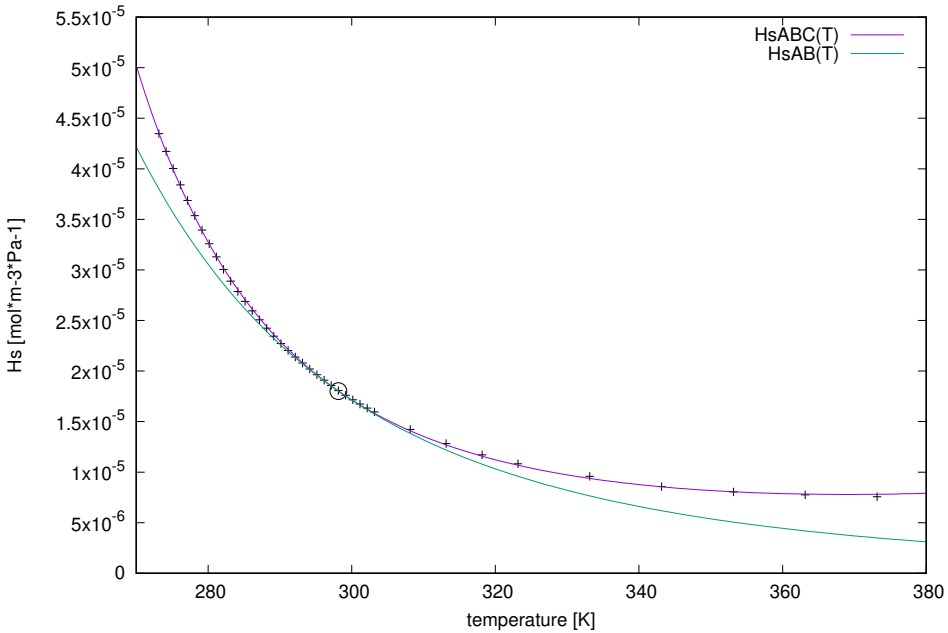

ref = 379; chem = ethene; casrn = 74-85-1; r2 = 0.99988

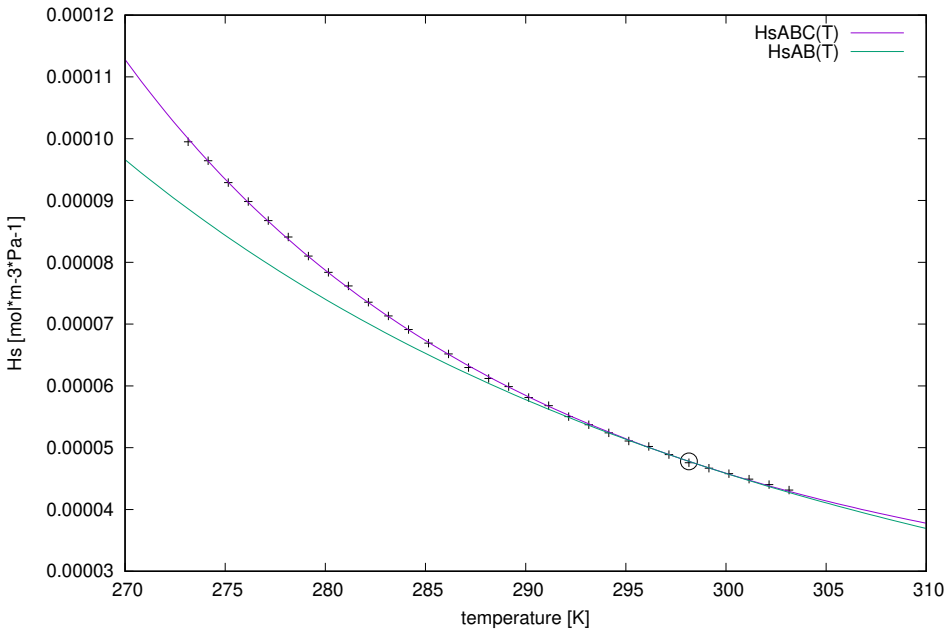

ref = 379; chem = ethyne; casrn = 74-86-2; r2 = 0.99983

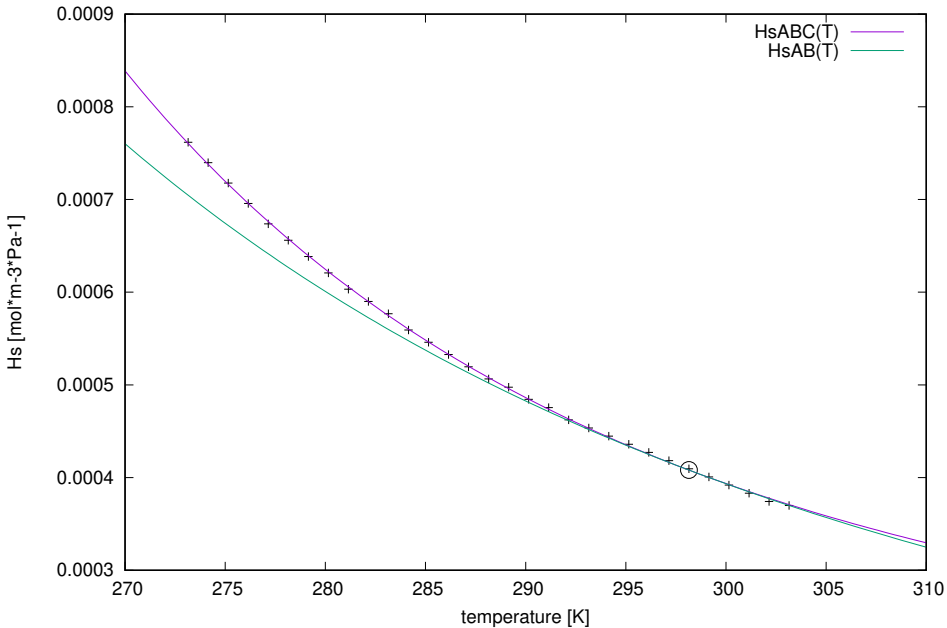

ref = 379; chem = krypton; casrn = 7439-90-9; r2 = 0.99997

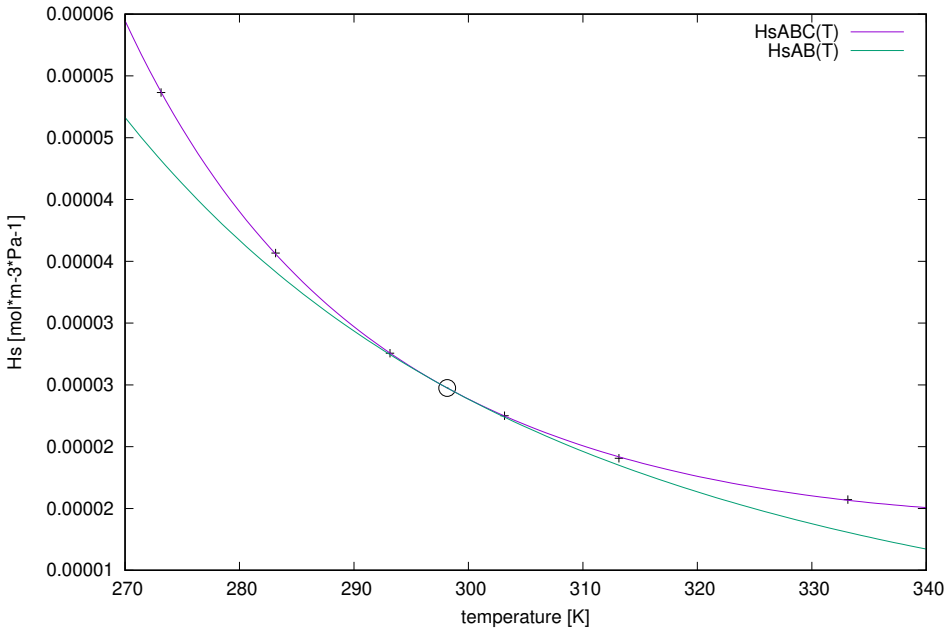

ref = 379; chem = neon; casrn = 7440-01-9; r2 = 0.99738

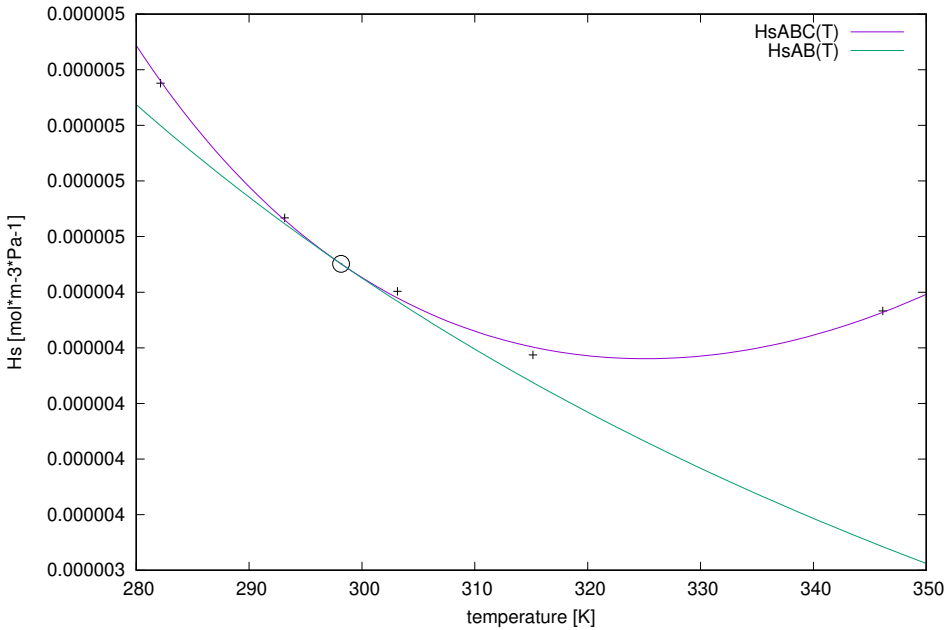

ref = 379; chem = argon; casrn = 7440-37-1; r2 = 0.99981

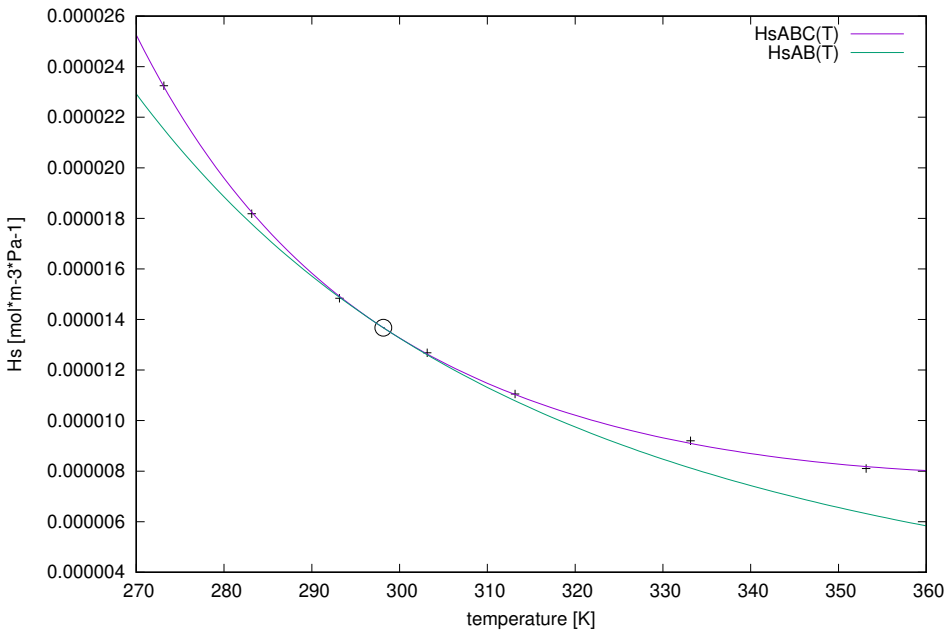

ref = 379; chem = helium; casrn = 7440-59-7; r2 = 0.99356

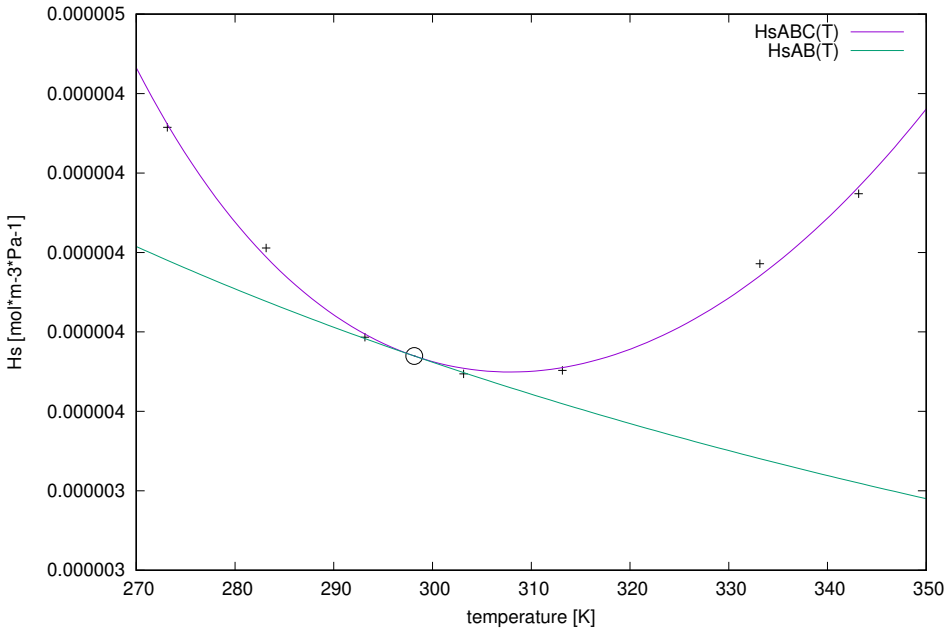



ref = 379; chem = xenon; casrn = 7440-63-3; r2 = 0.99830

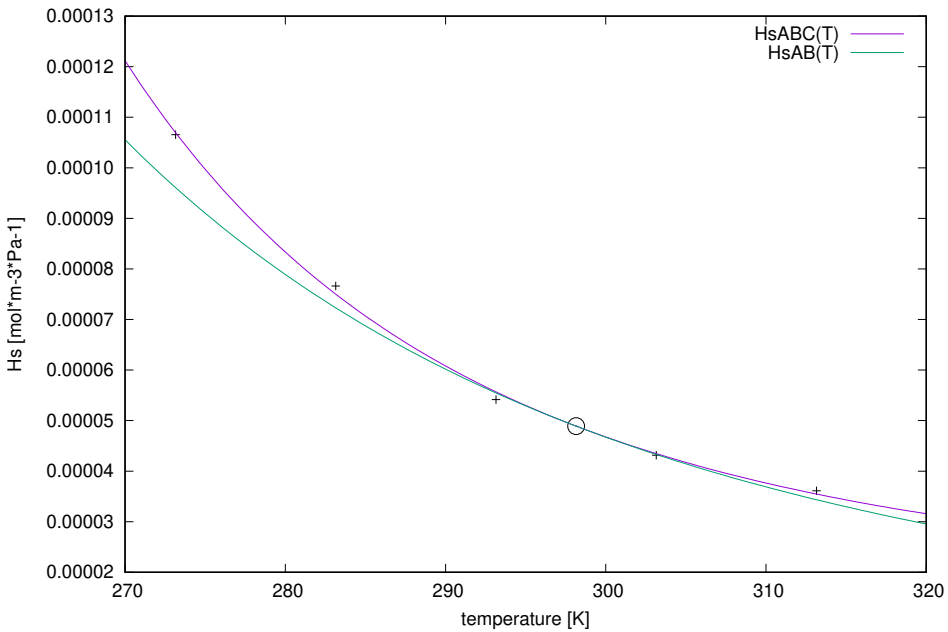

ref = 379; chem = sulfur dioxide; casrn = 7446-09-5; r2 = 0.99995

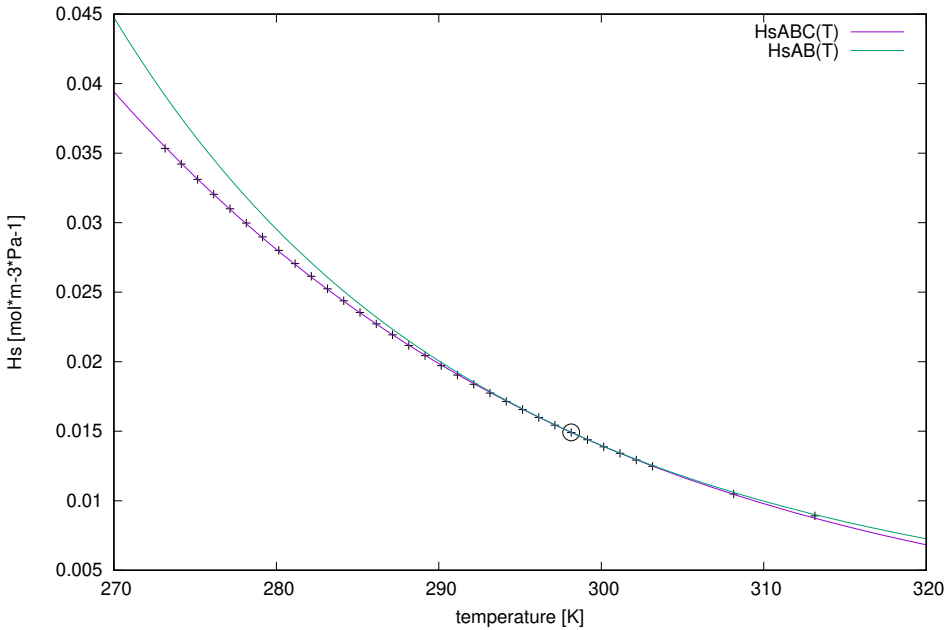

ref = 379; chem = hydrogen chloride; casrn = 7647-01-0; r2 = 1.00000

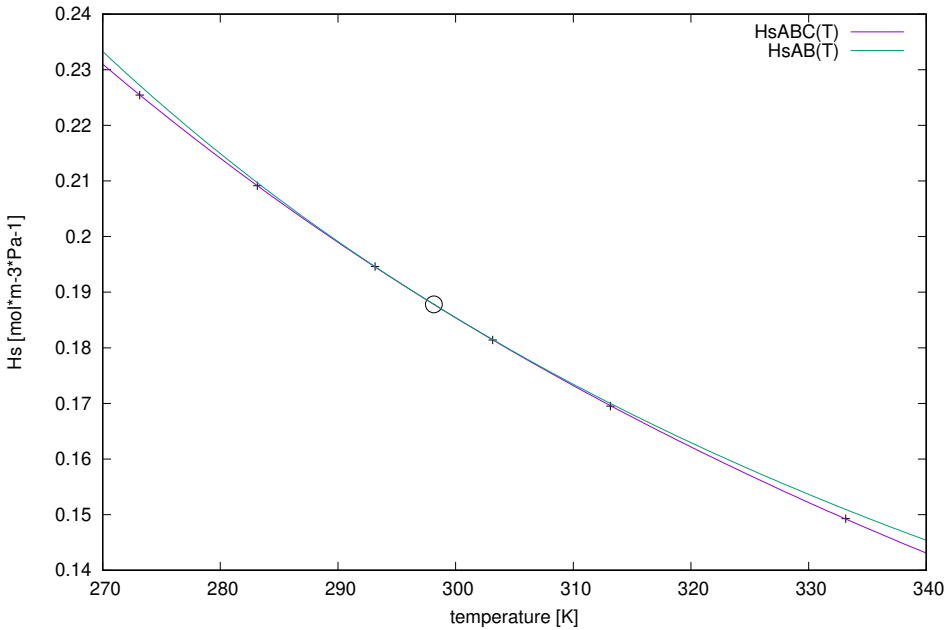

ref = 379; chem = ammonia; casrn = 7664-41-7; r2 = 0.99722

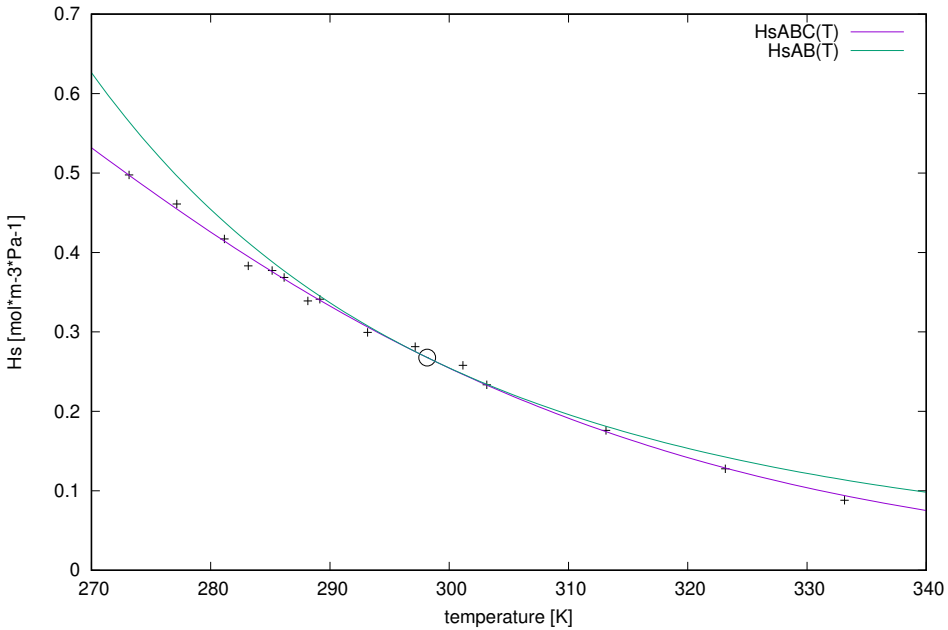

ref = 379; chem = molecular bromine; casrn = 7726-95-6; r2 = 0.99997

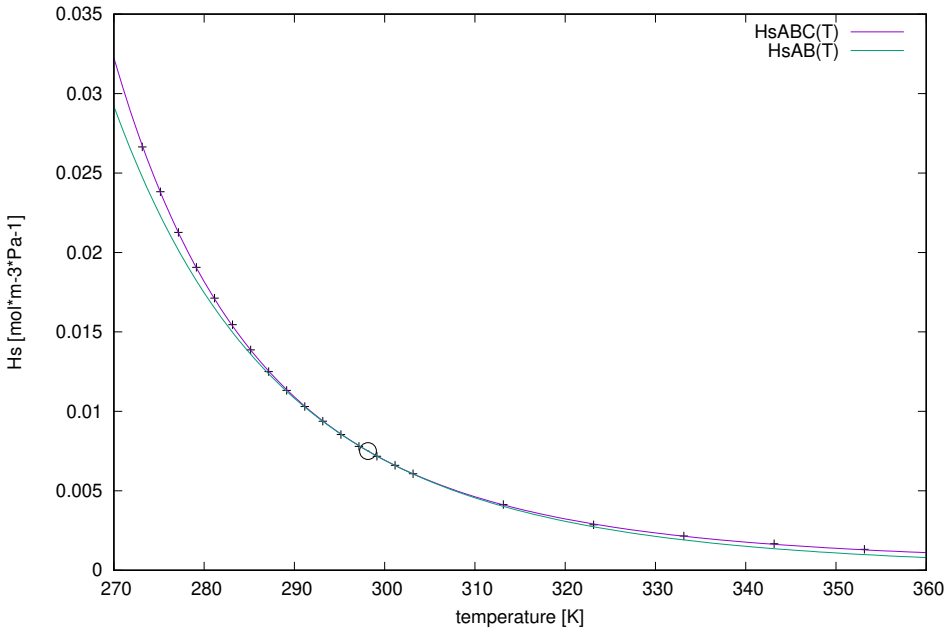

ref = 379; chem = nitrogen; casrn = 7727-37-9; r2 = 0.99982

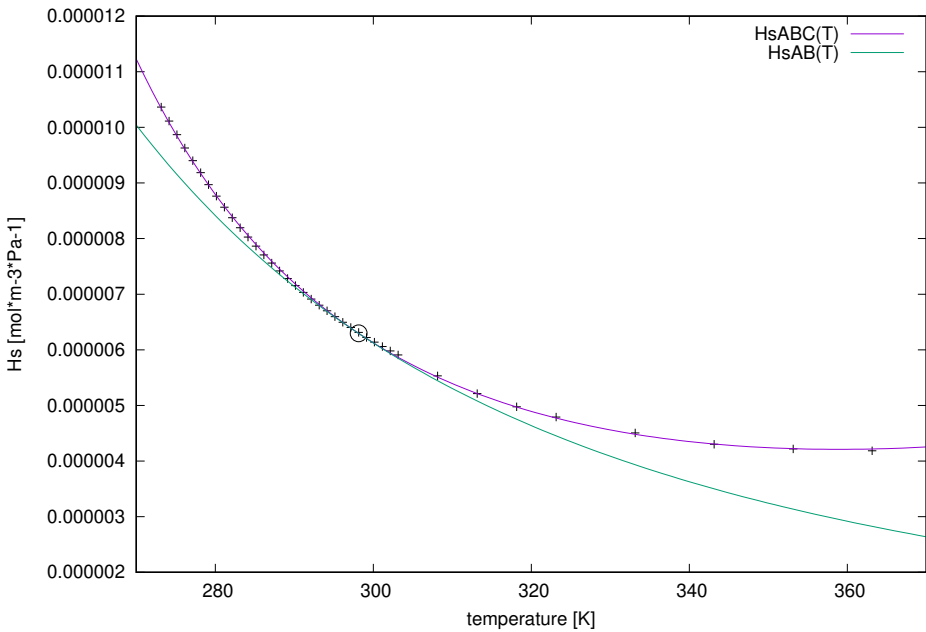

ref = 379; chem = oxygen; casrn = 7782-44-7; r2 = 0.99984

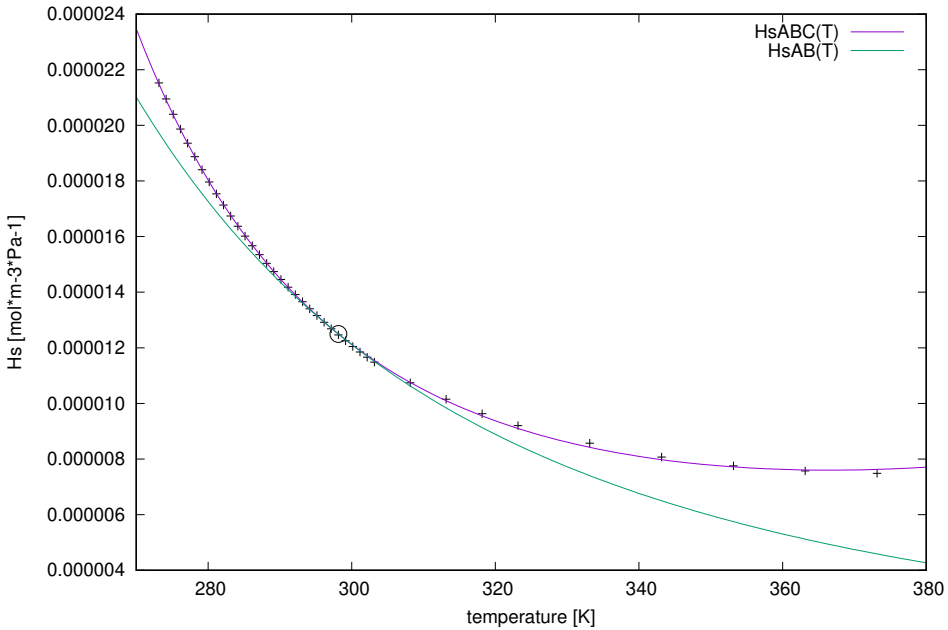

ref = 379; chem = hydrogen sulfide; casrn = 7783-06-4; r2 = 0.99995

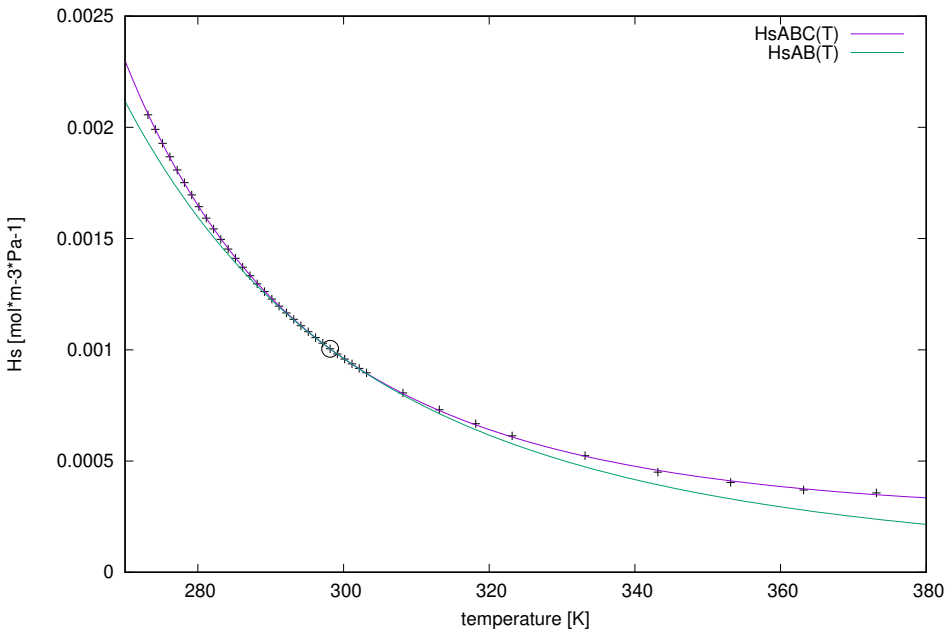



ref = 483; chem = propenal; casrn = 107-02-8; r2 = 1.00000

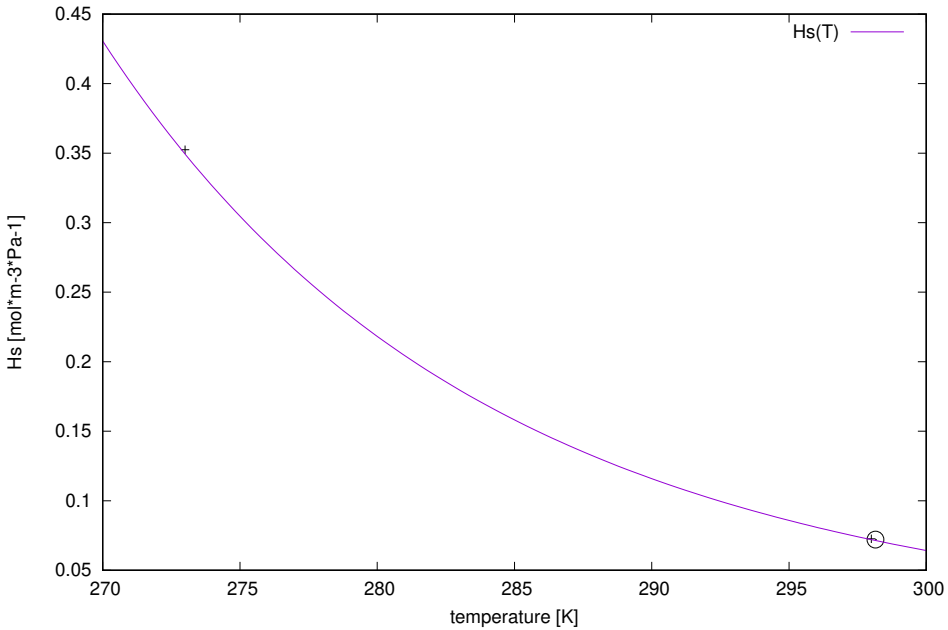

ref = 483; chem = ethanol; casrn = 64-17-5; r2 = 1.00000

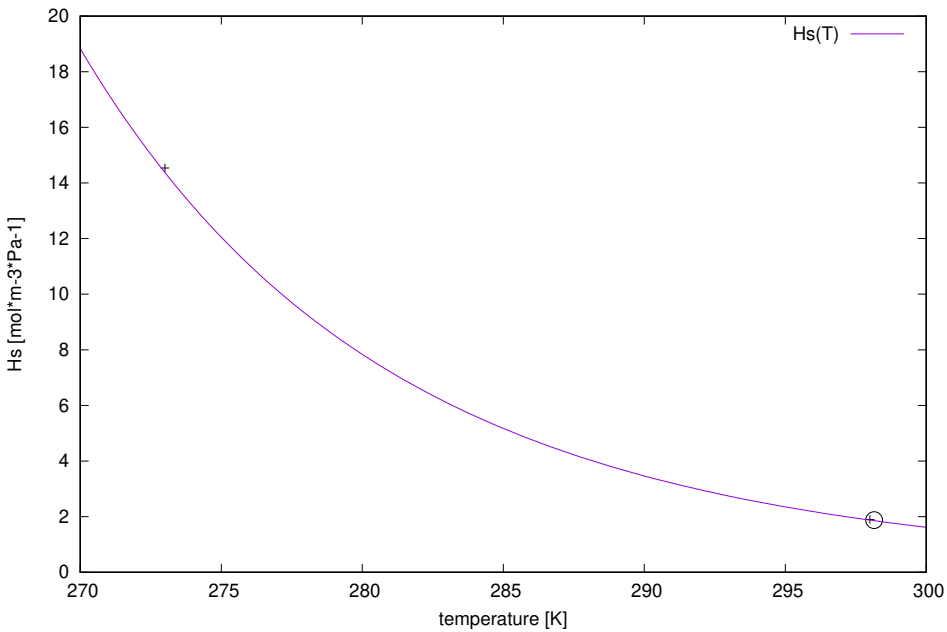

ref = 483; chem = methanol; casrn = 67-56-1; r2 = 1.00000

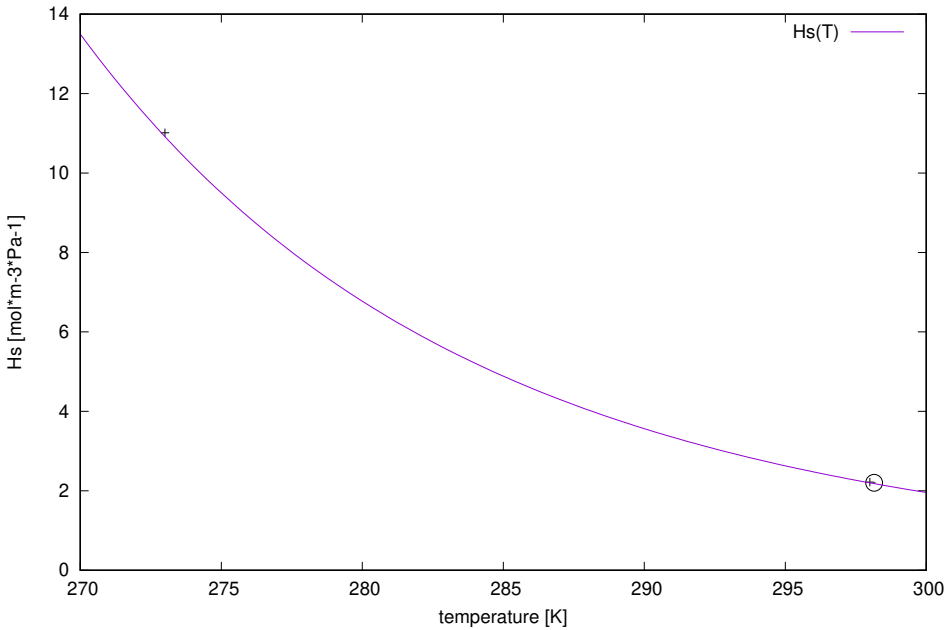

ref = 483; chem = 2-propanol; casrn = 67-63-0; r2 = 1.00000

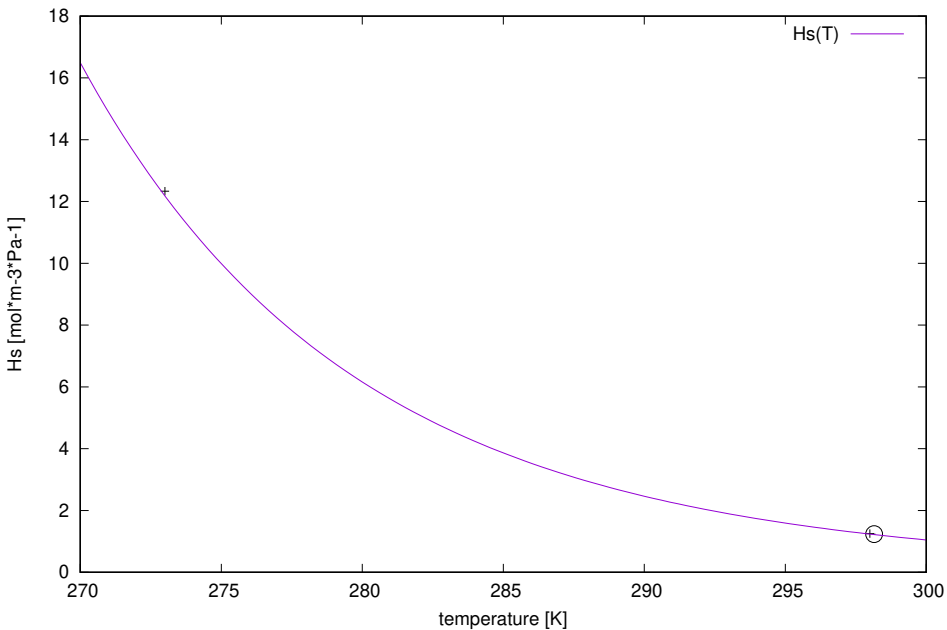

ref = 483; chem = propanone; casrn = 67-64-1; r2 = 1.00000

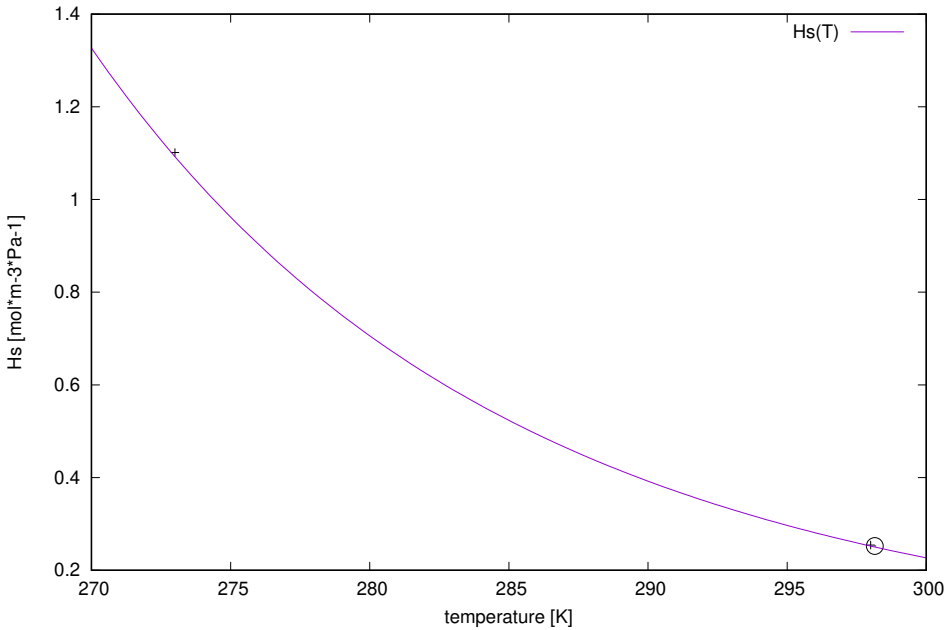

ref = 483; chem = 1-propanol; casrn = 71-23-8; r2 = 1.00000

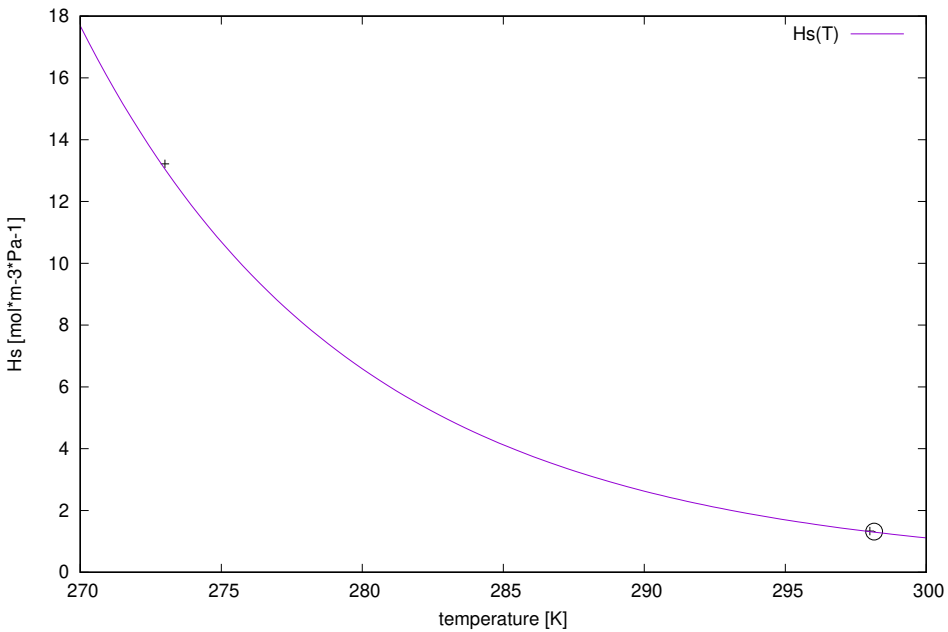

ref = 483; chem = 1-butanol; casrn = 71-36-3; r2 = 1.00000

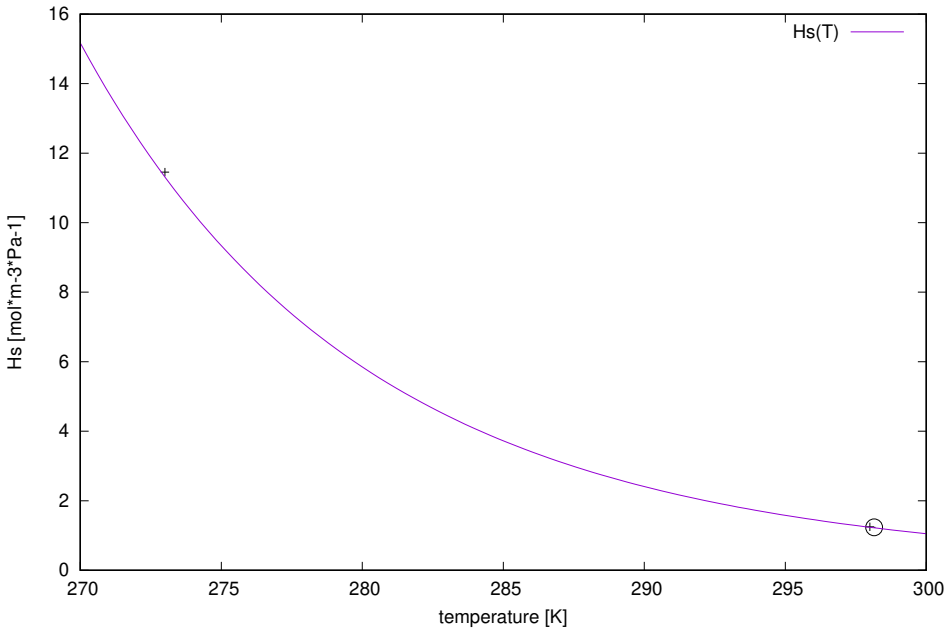

ref = 483; chem = ethane nitrile; casrn = 75-05-8; r2 = 1.00000

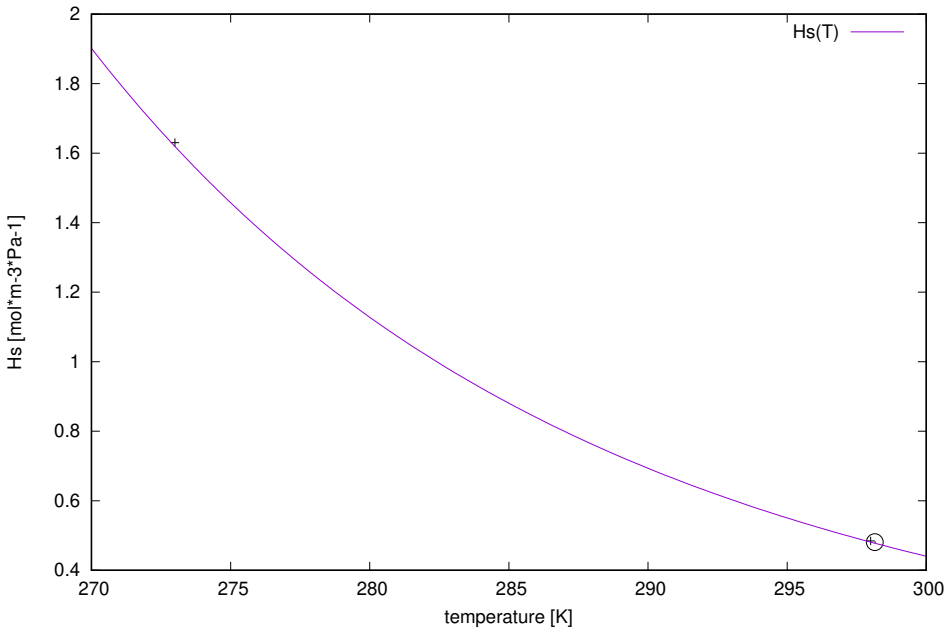



ref = 483; chem = ethanal; casrn = 75-07-0; r2 = 1.00000

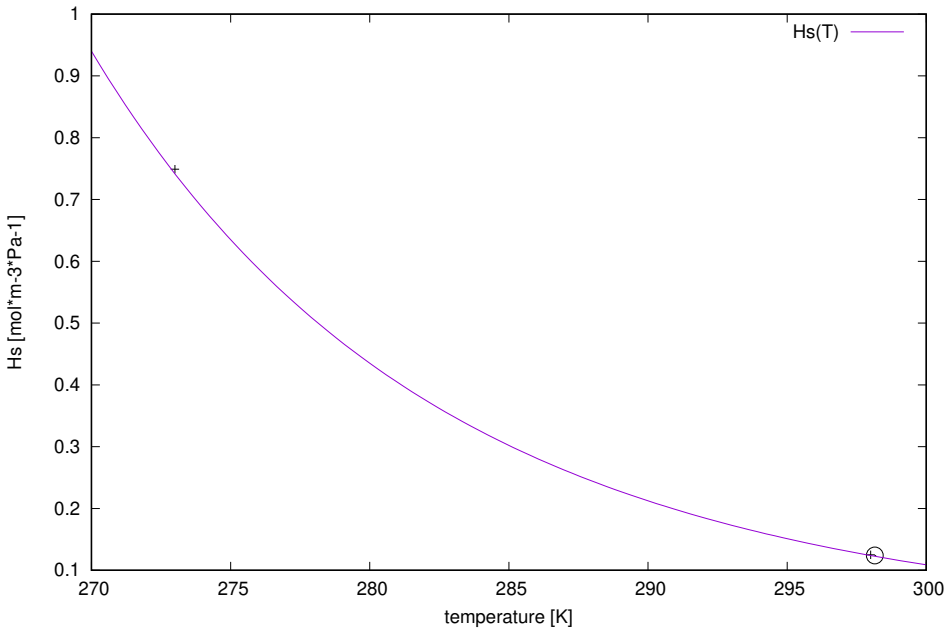

ref = 483; chem = 2-methyl-2-propanol; casrn = 75-65-0; r2 = 1.00000

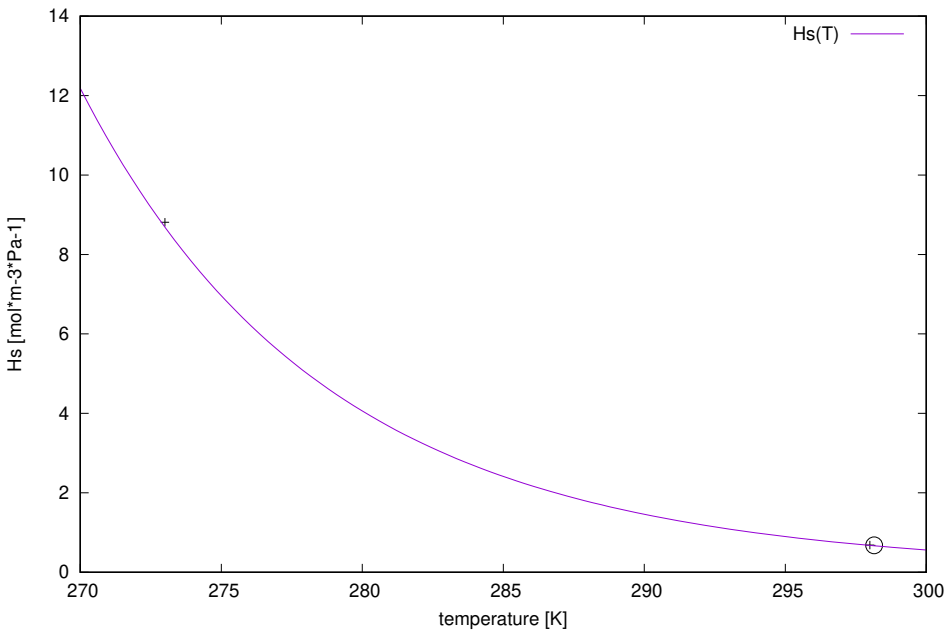

ref = 483; chem = 2-butanol; casrn = 78-92-2; r2 = 1.00000

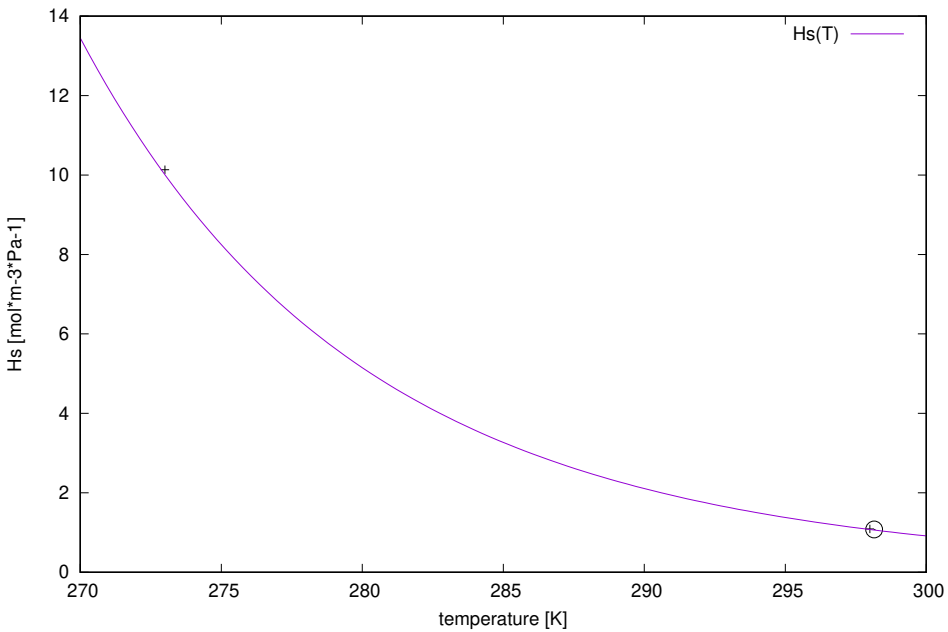

ref = 483; chem = 2-butanone; casrn = 78-93-3; r2 = 1.00000

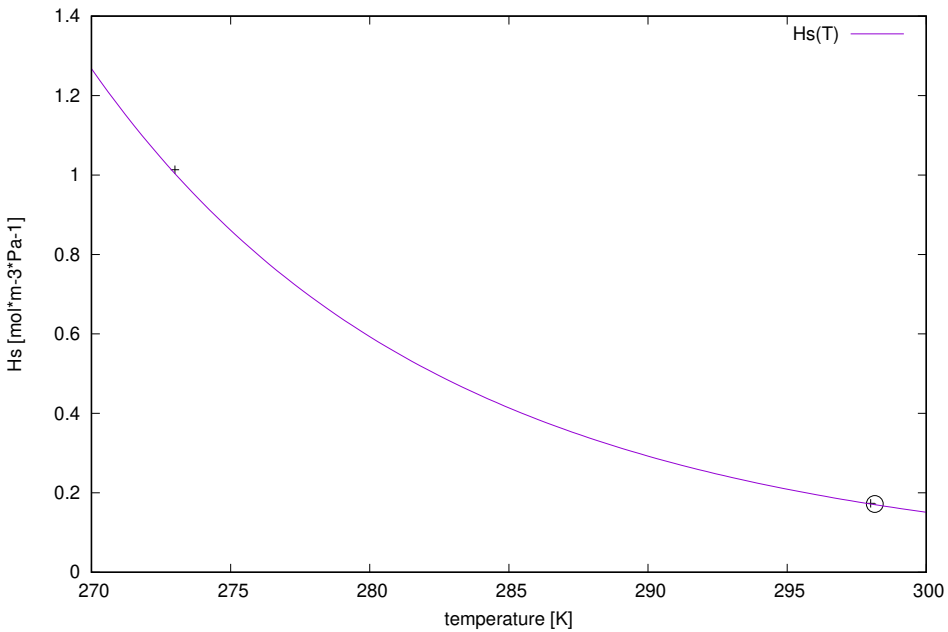

ref = 484; chem = benzaldehyde; casrn = 100-52-7; r2 = 0.99990

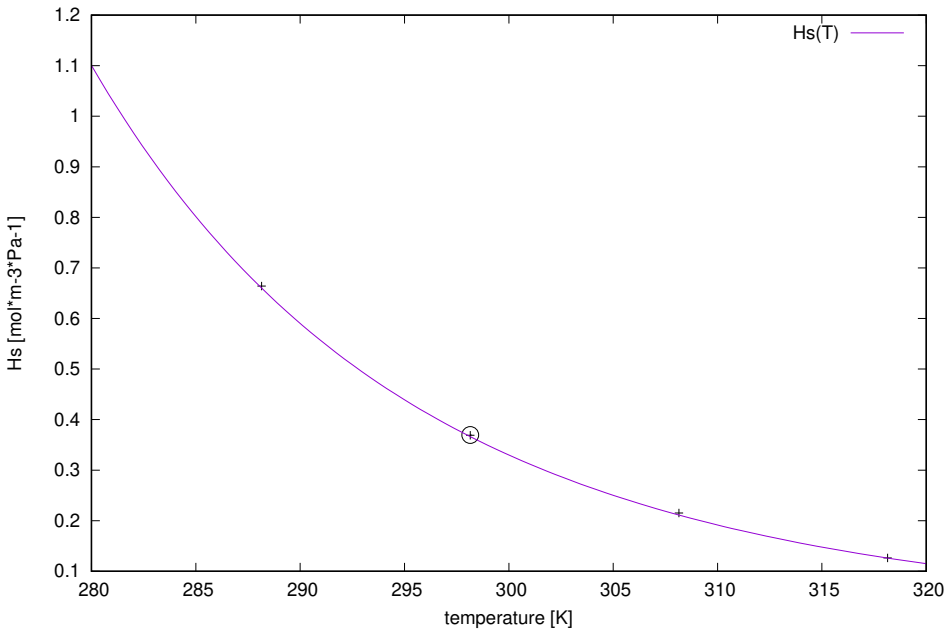

ref = 484; chem = 2-hydroxyethanal; casrn = 141-46-8; r2 = 1.00000

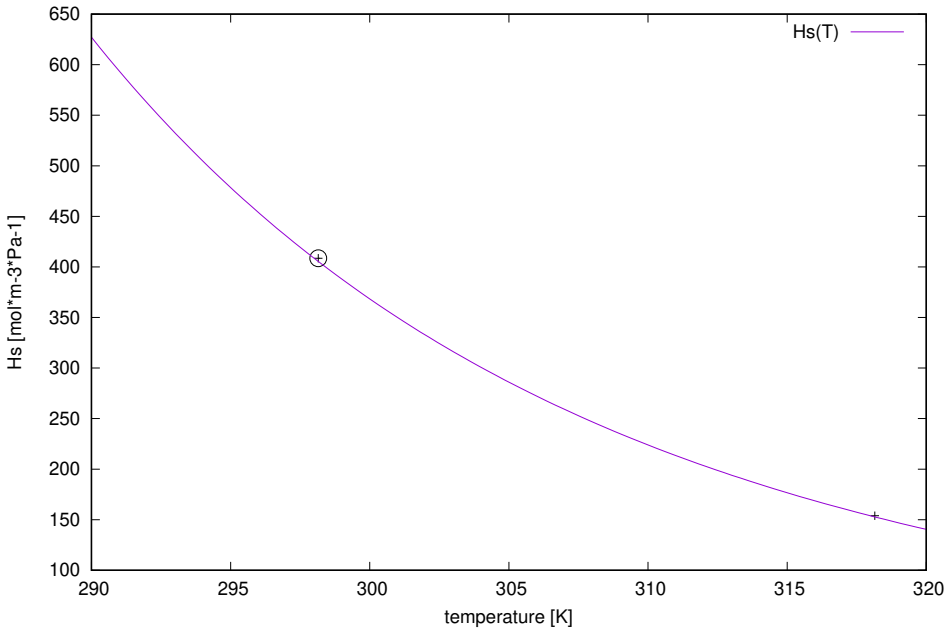

ref = 484; chem = methanal; casrn = 50-00-0; r2 = 0.99822

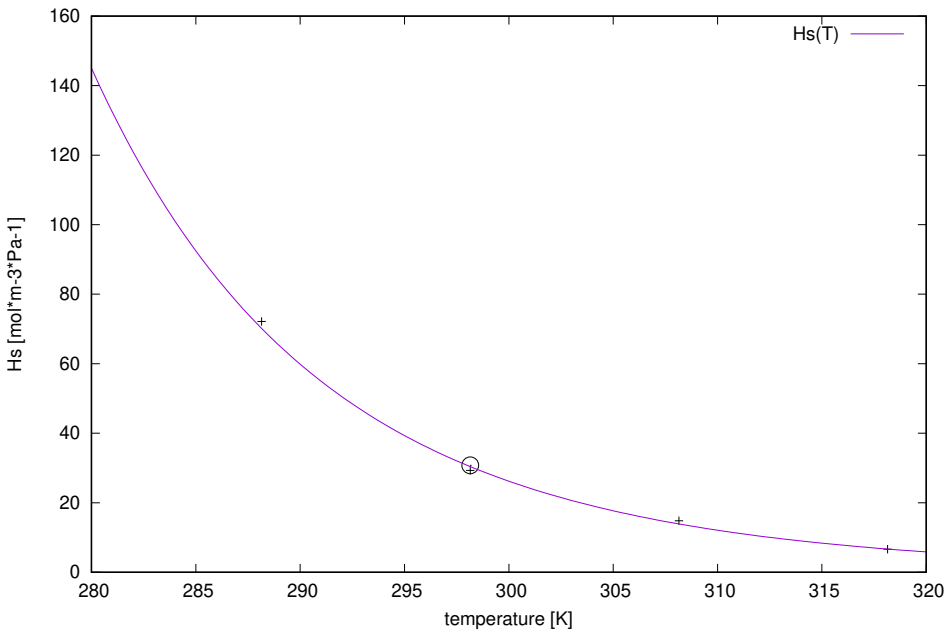

ref = 484; chem = ethanal; casrn = 75-07-0; r2 = 0.99643

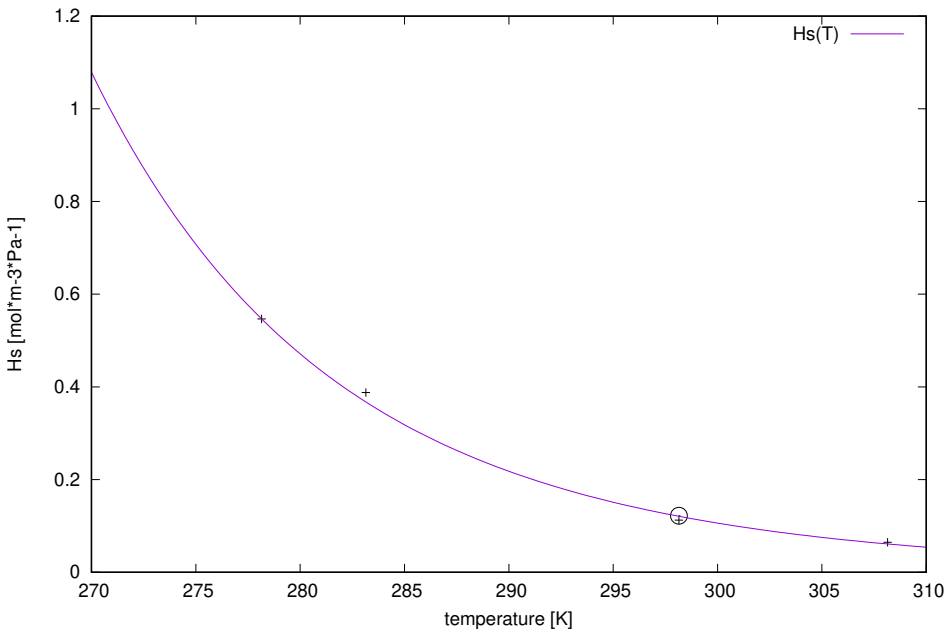



ref = 484; chem = trichloroethanal; casrn = 75-87-6; r2 = 0.99289

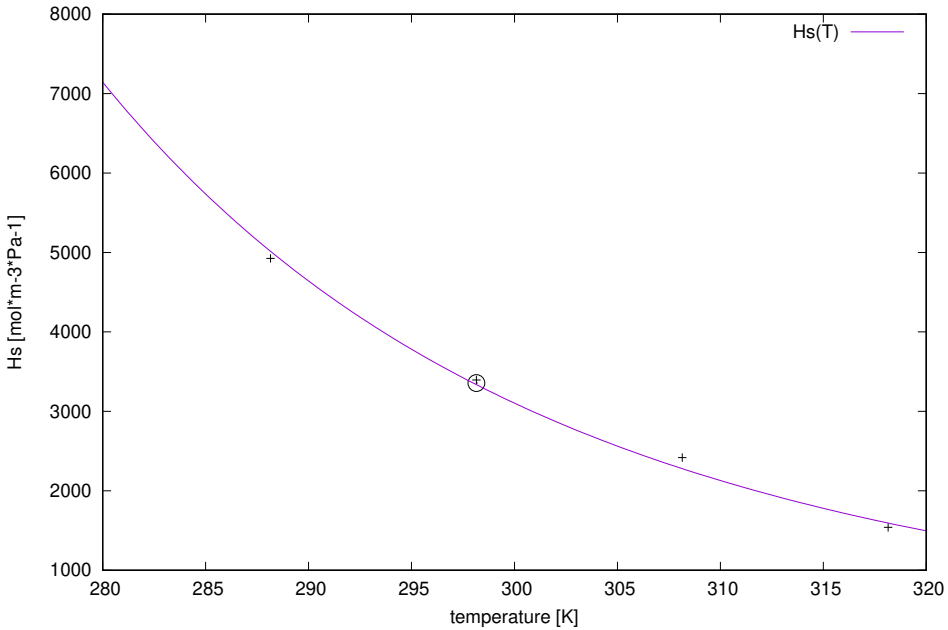

ref = 484; chem = propanonal; casrn = 78-98-8; r2 = 0.98765

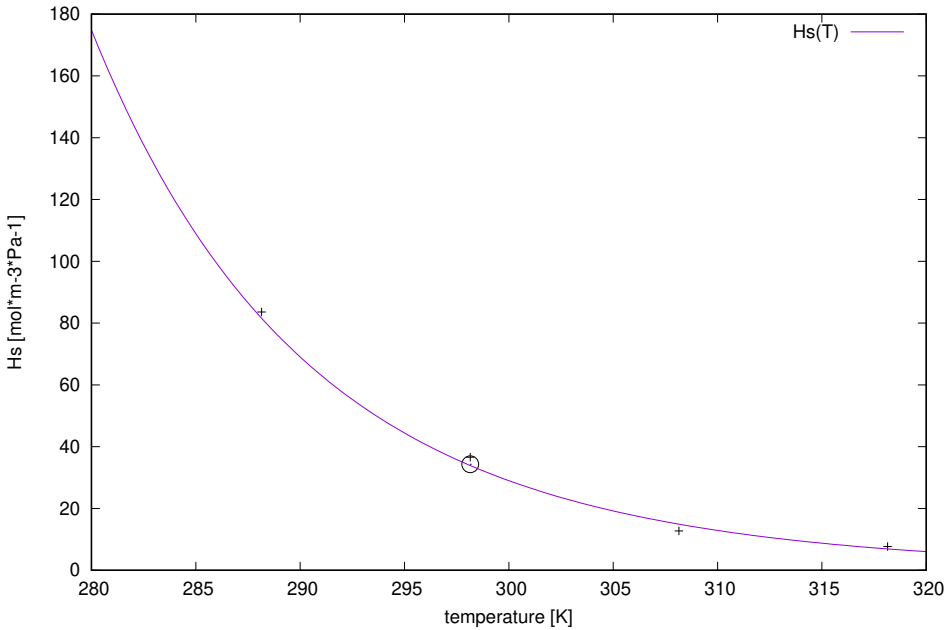

ref = 491; chem = oxygen; casrn = 7782-44-7; r2 = 0.99998

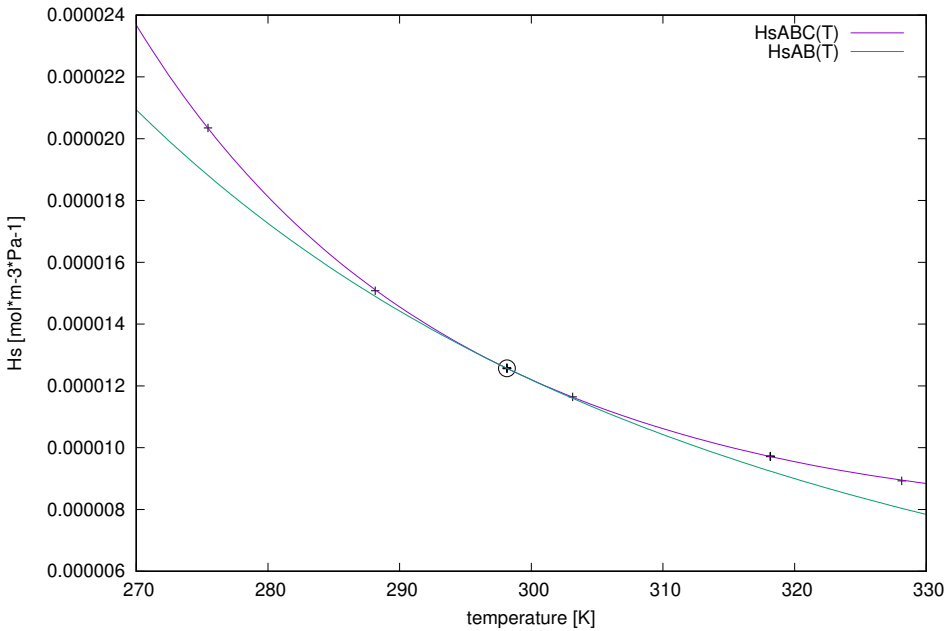

ref = 514; chem = dinitrogen pentoxide; casrn = 10102-03-1; r2 = 1.00000

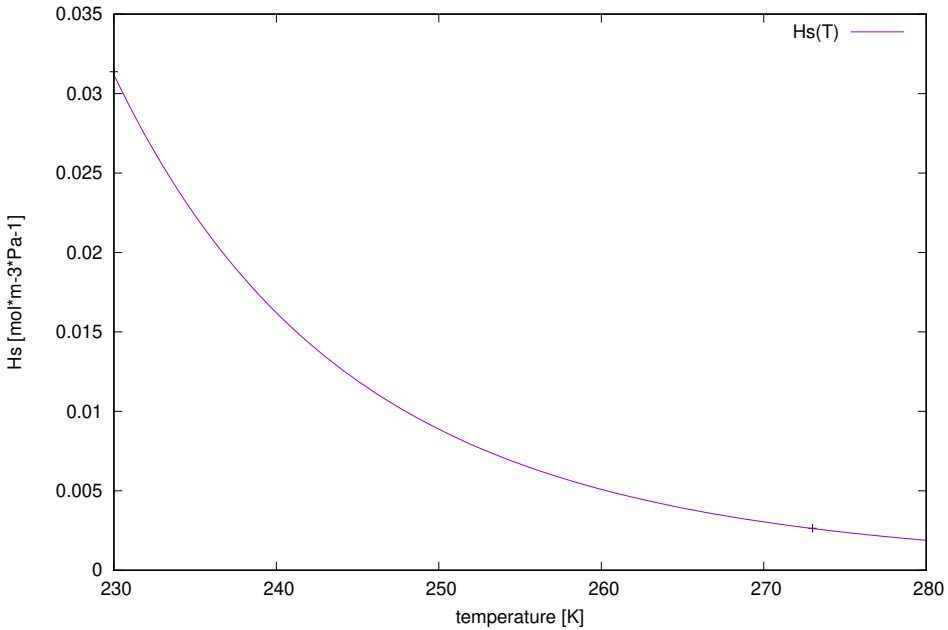

ref = 515; chem = hydroperoxy radical; casrn = 3170-83-0; r2 = 0.99976

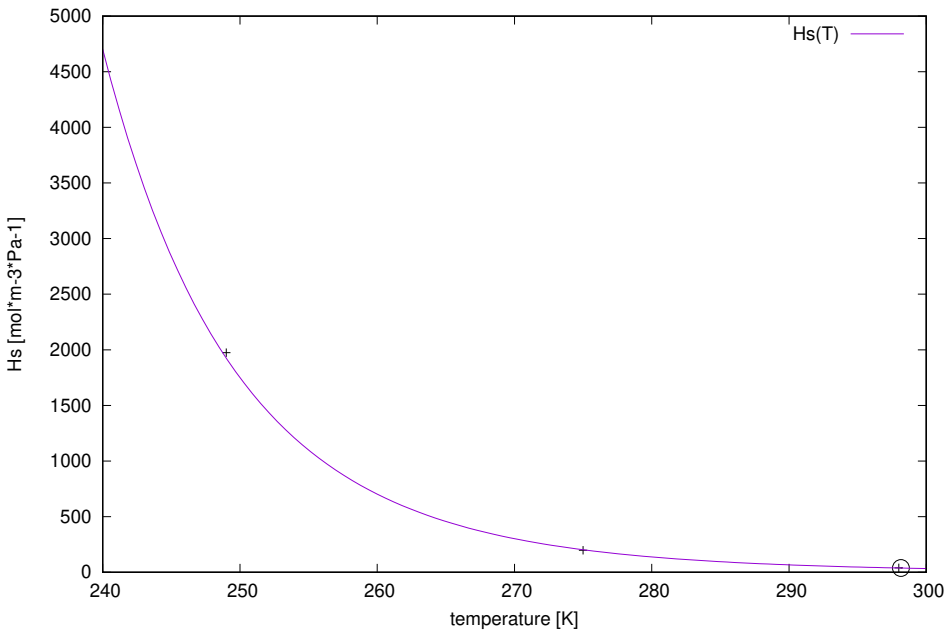

ref = 515; chem = hydroxyl radical; casrn = 3352-57-6; r2 = 0.99999

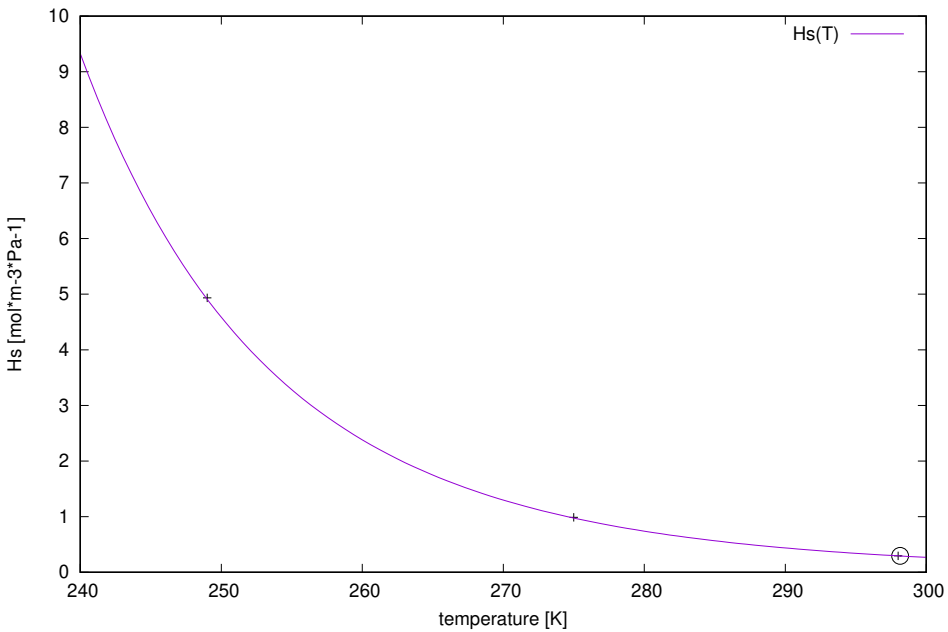

ref = 525; chem = oxygen; casrn = 7782-44-7; r2 = 0.99988

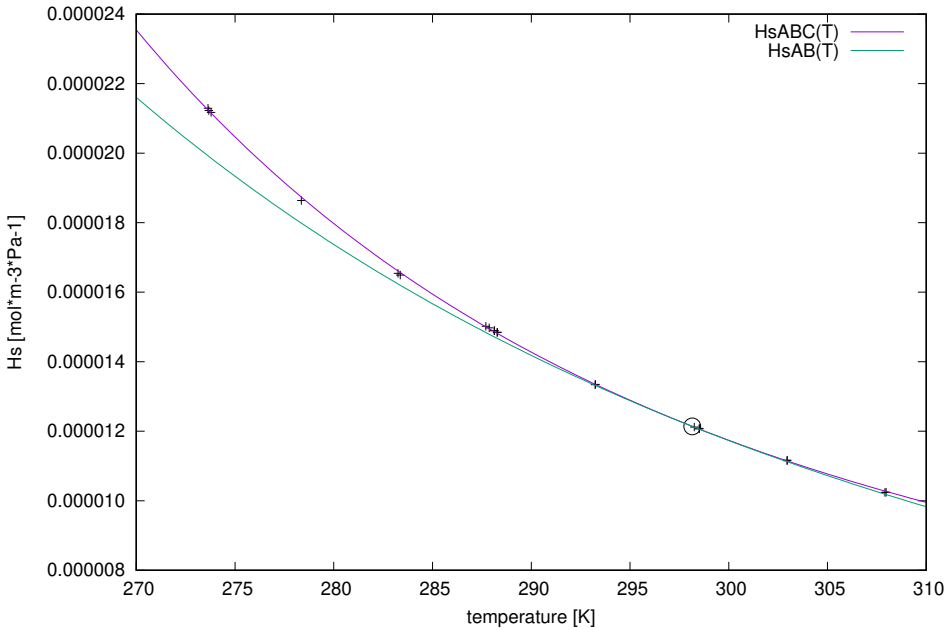

ref = 528; chem = ozone; casrn = 10028-15-6; r2 = 1.00000

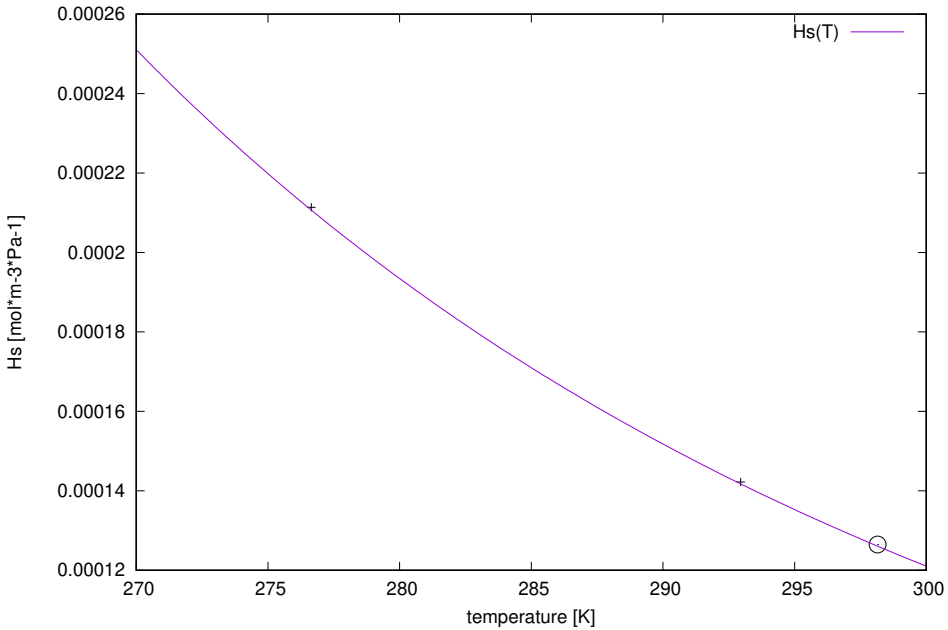



ref = 533; chem = 2-butyl nitrate; casrn = 924-52-7; r2 = 1.00000

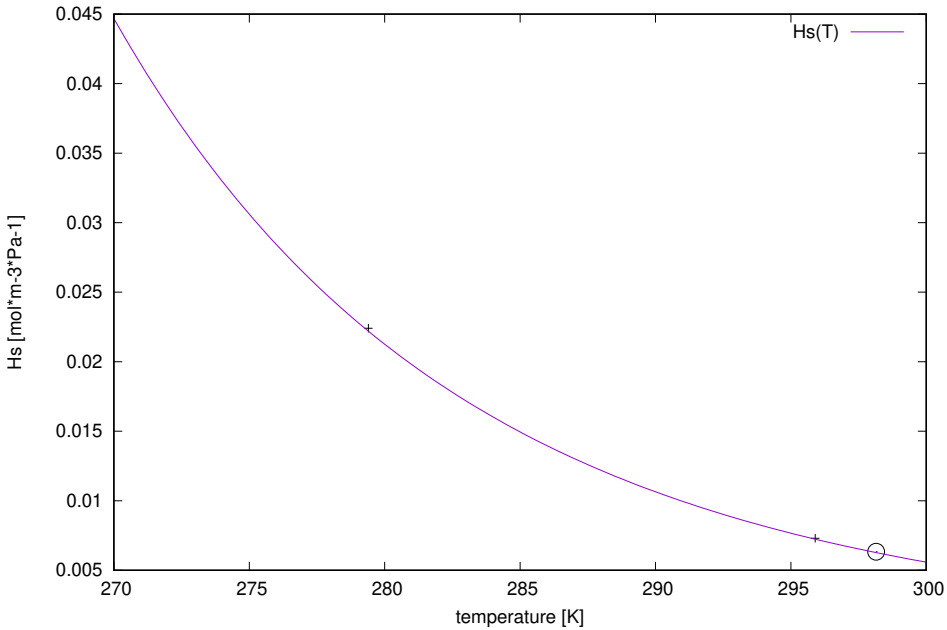

ref = 533; chem = 1-butyl nitrate; casrn = 928-45-0; r2 = 1.00000

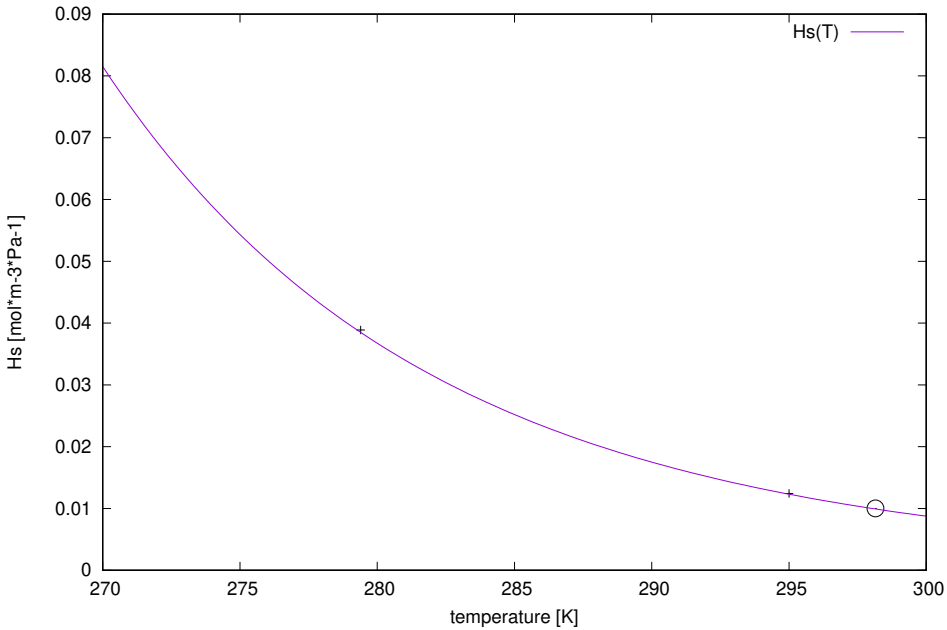

ref = 583; chem = dibromochloromethane; casrn = 124-48-1; r2 = 1.00000

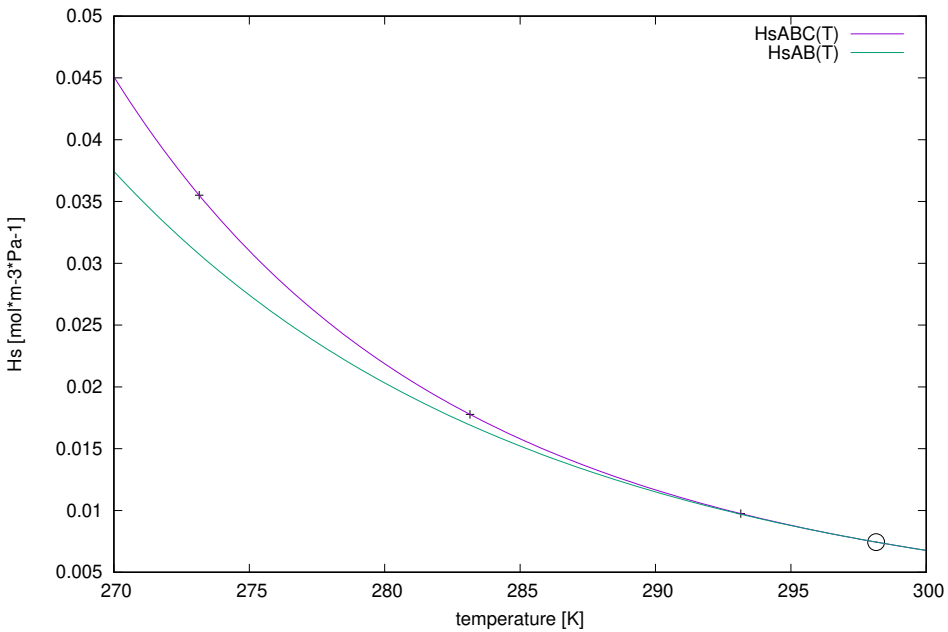

ref = 583; chem = chloriodomethane; casrn = 593-71-5; r2 = 1.00000

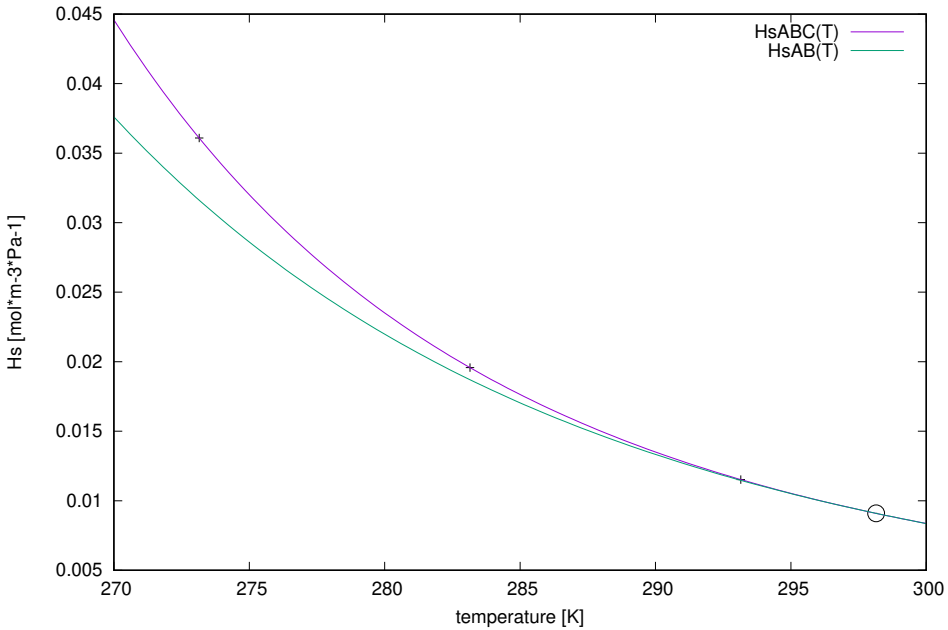

ref = 583; chem = trichloromethane; casrn = 67-66-3; r2 = 1.00000

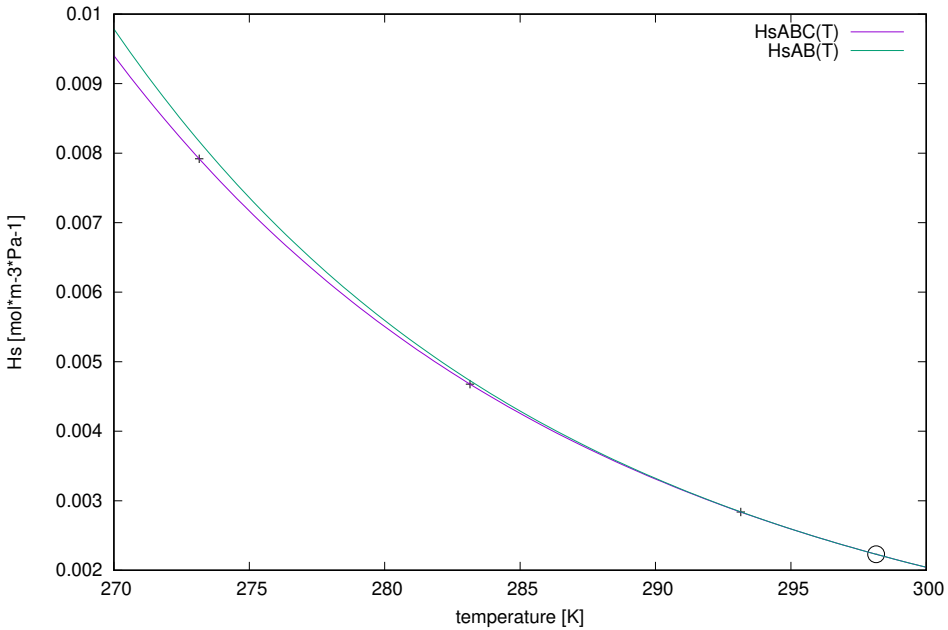

ref = 583; chem = chloromethane; casrn = 74-87-3; r2 = 0.99519

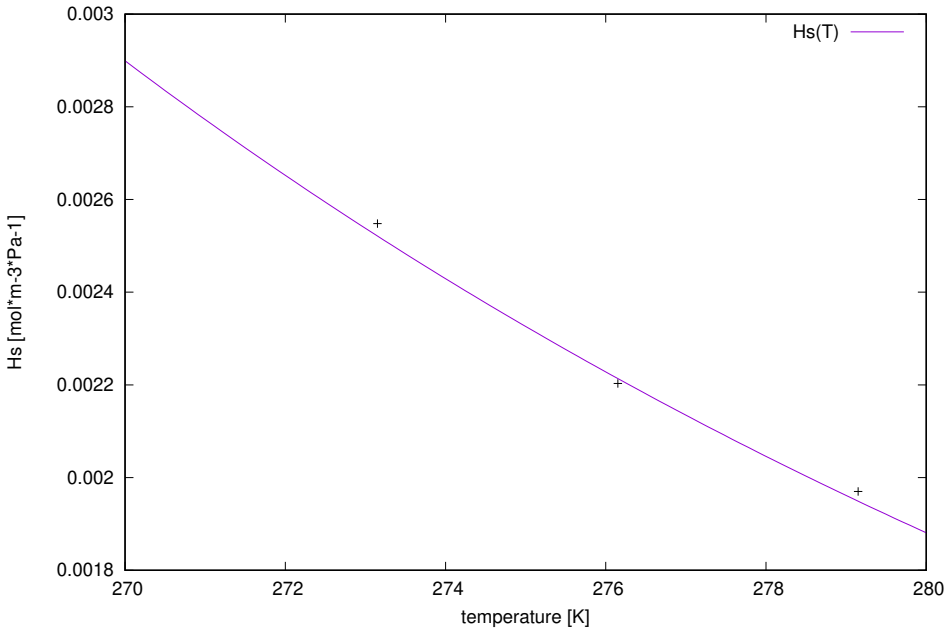

ref = 583; chem = iodomethane; casrn = 74-88-4; r2 = 1.00000

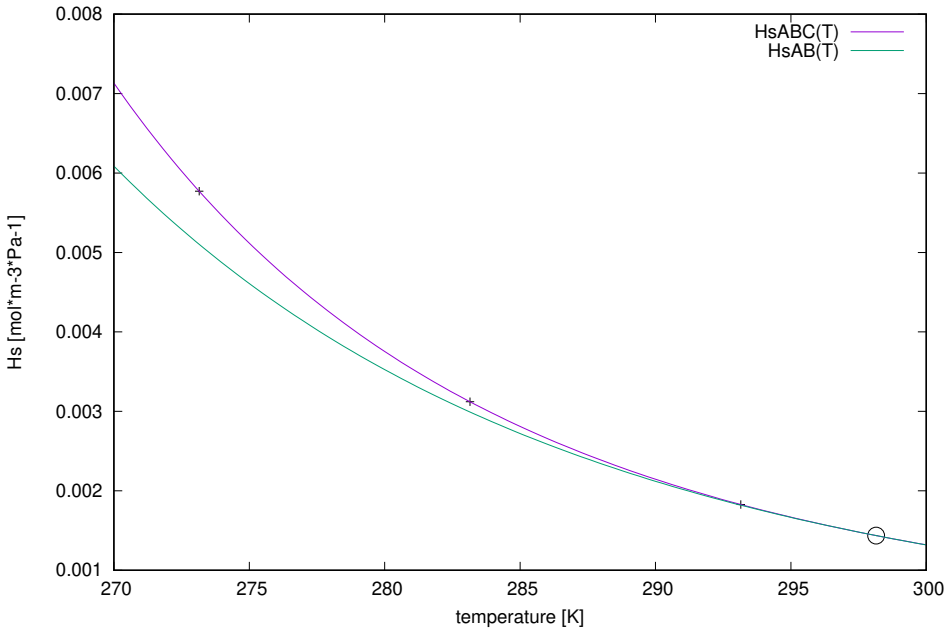

ref = 583; chem = dibromomethane; casrn = 74-95-3; r2 = 1.00000

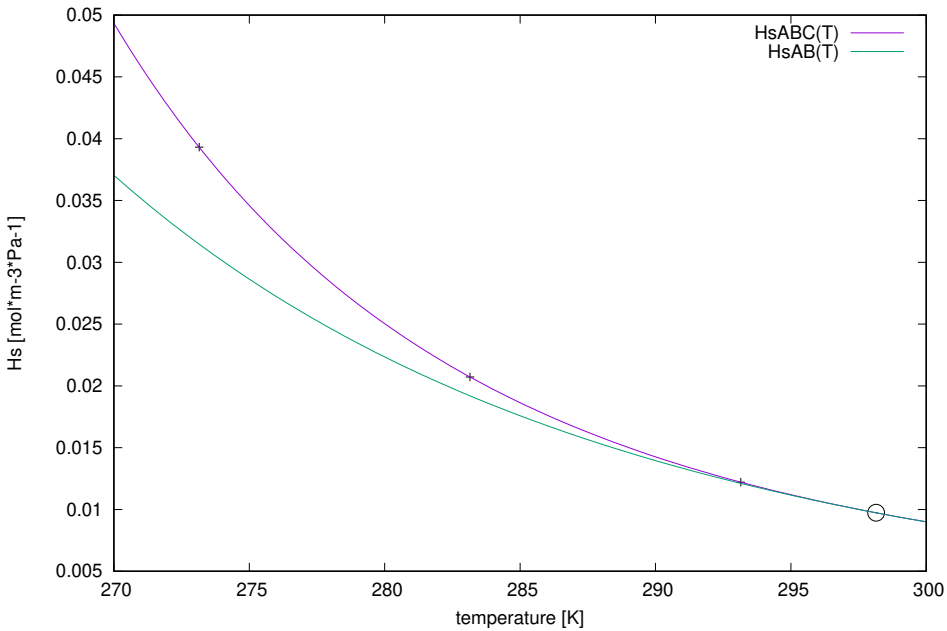



ref = 583; chem = diiodomethane; casrn = 75-11-6; r2 = 1.00000

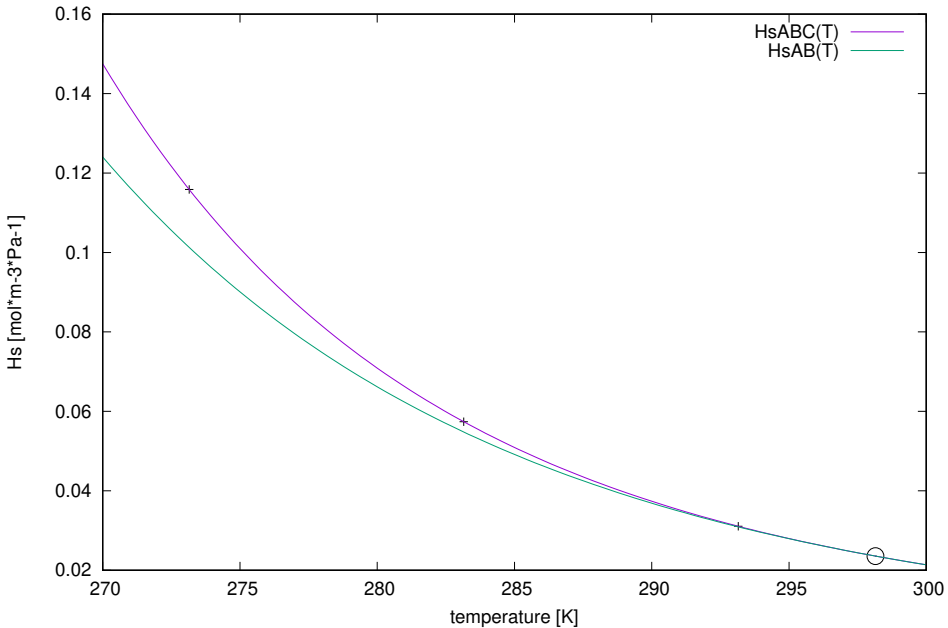

ref = 583; chem = tribromomethane; casrn = 75-25-2; r2 = 1.00000

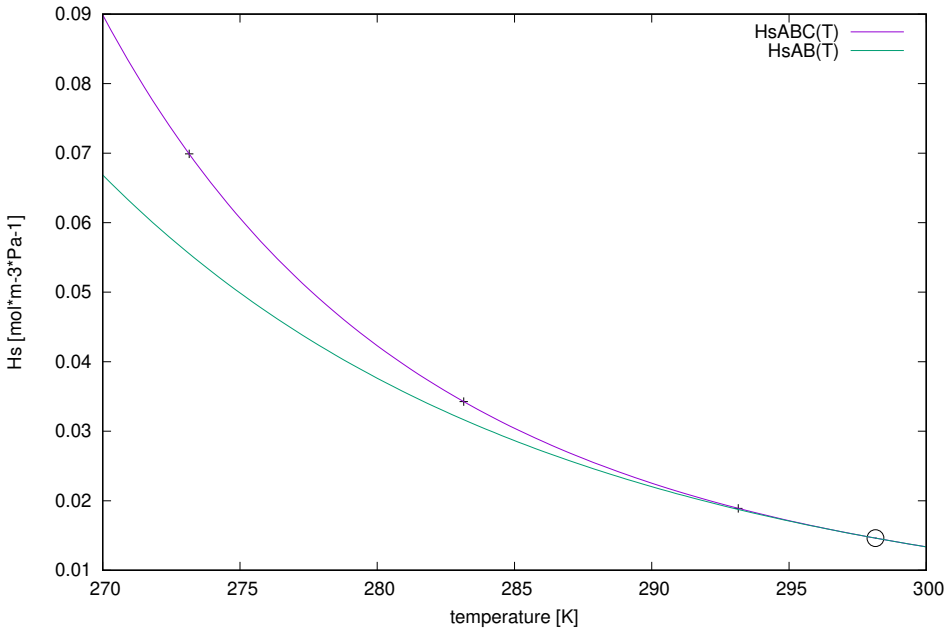

ref = 583; chem = bromodichloromethane; casrn = 75-27-4; r2 = 1.00000

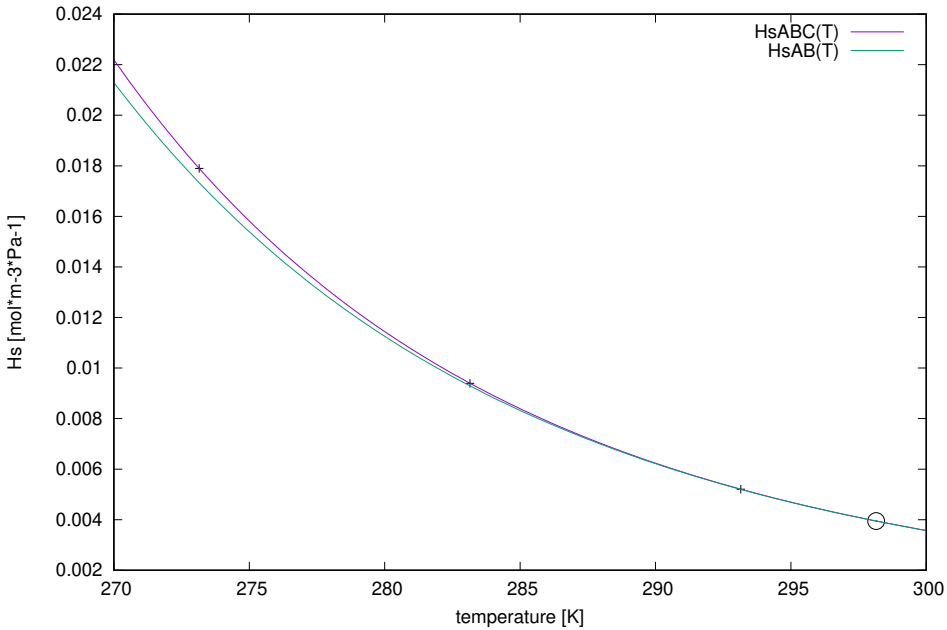

ref = 599; chem = ethylbenzene; casrn = 100-41-4; r2 = 1.00000

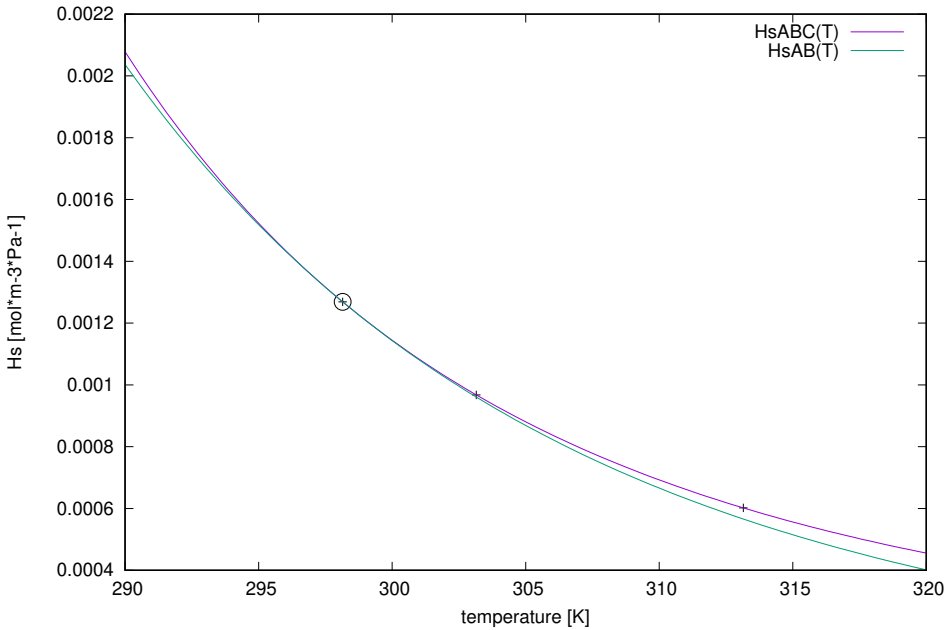

ref = 599; chem = methylbenzene; casrn = 108-88-3; r2 = 0.99264

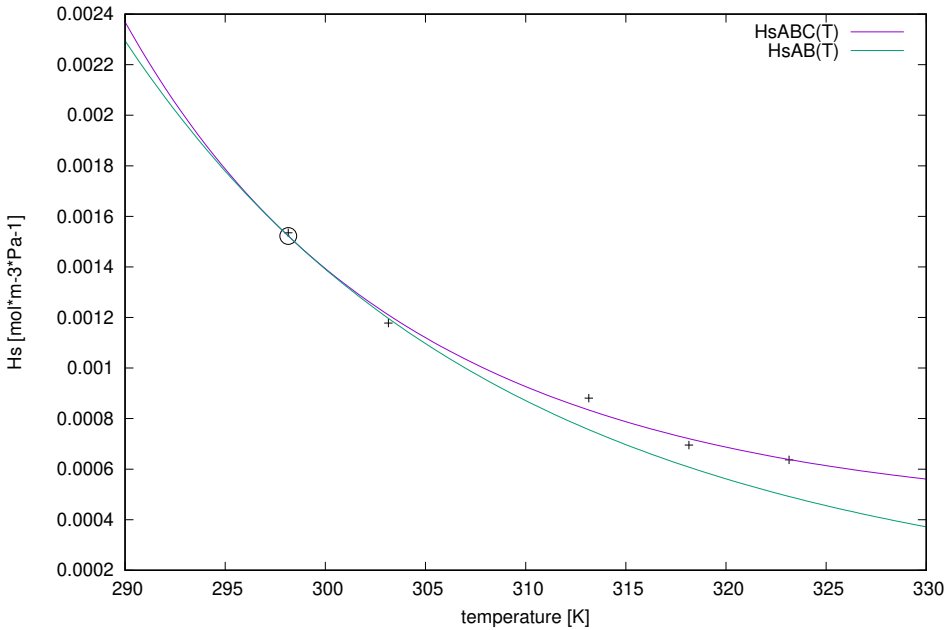

ref = 599; chem = tetrachloroethene; casrn = 127-18-4; r2 = 0.98558

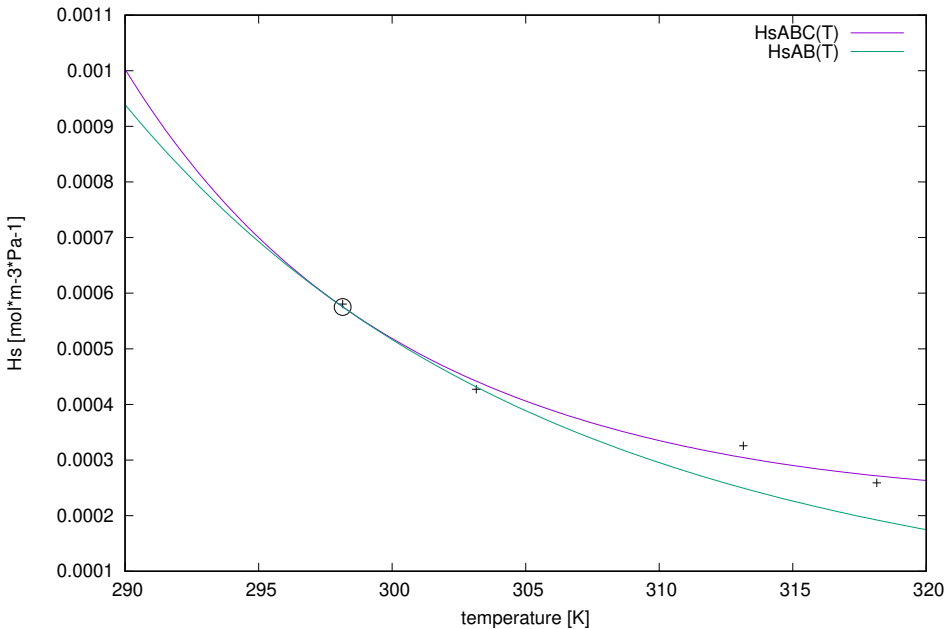

ref = 599; chem = Me t-Bu ether; casrn = 1634-04-4; r2 = 0.99268

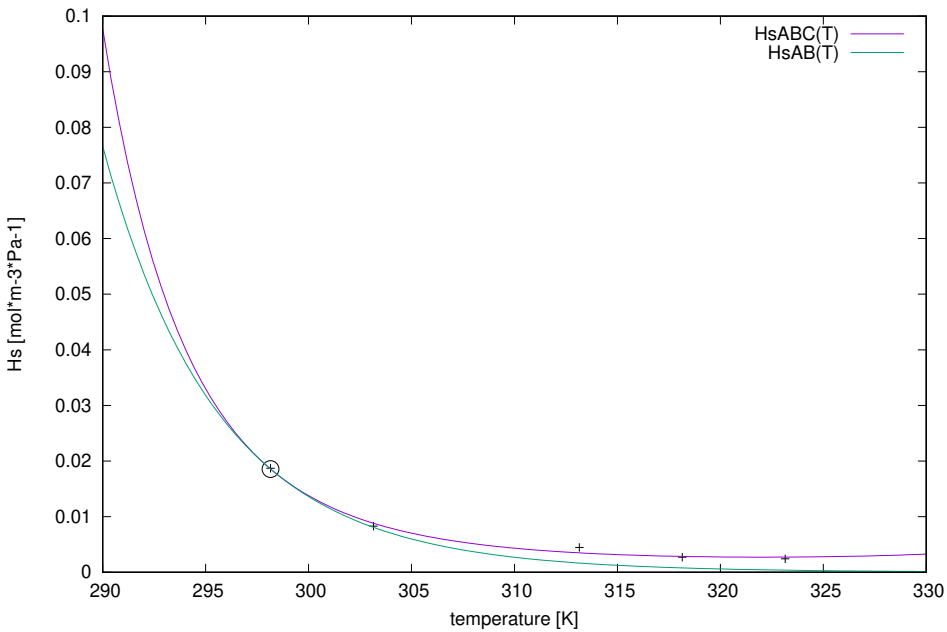

ref = 599; chem = benzene; casrn = 71-43-2; r2 = 0.98448

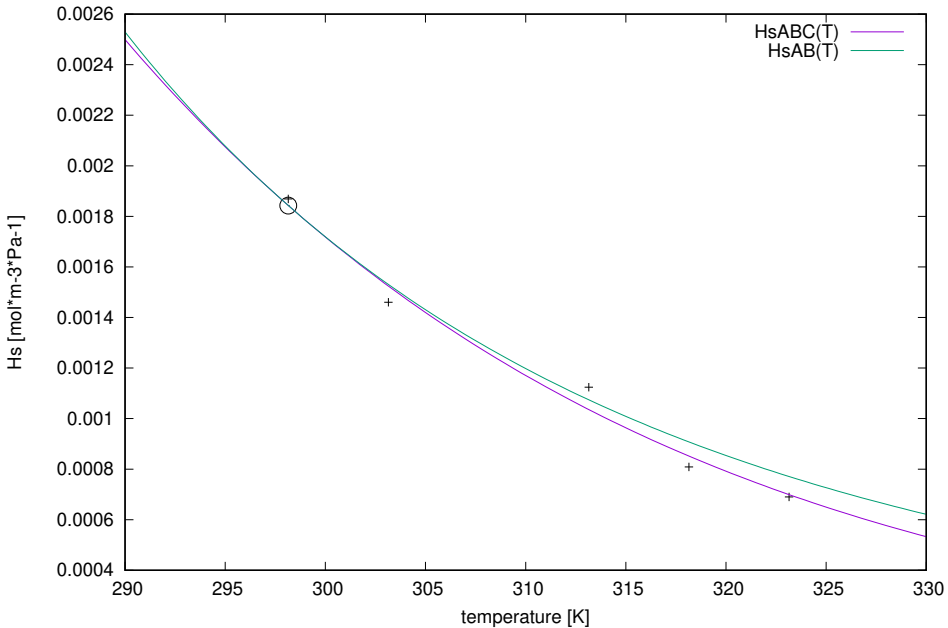



ref = 599; chem = 1,1,1-trichloroethane; casrn = 71-55-6; r2 = 0.97637

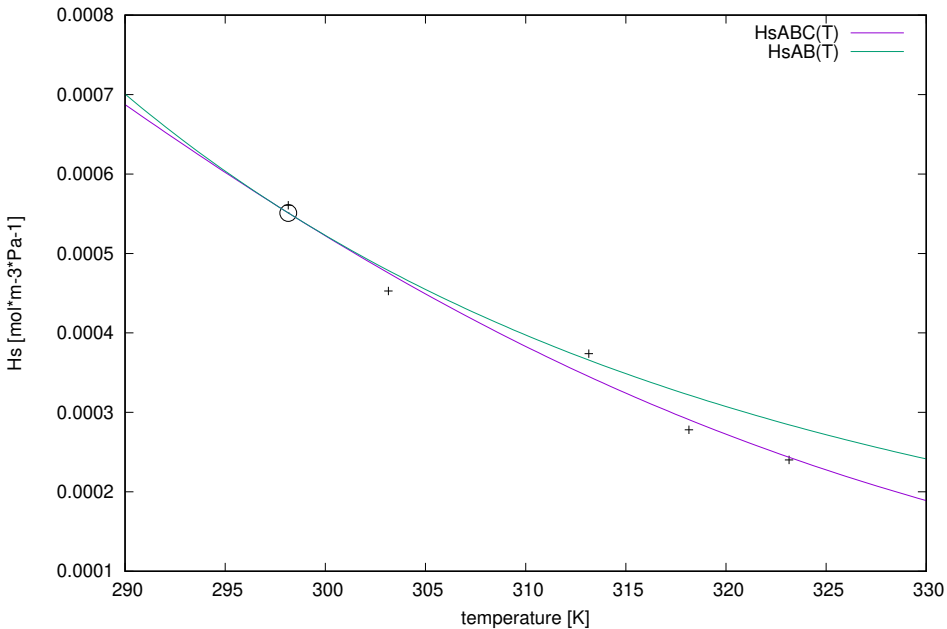

ref = 599; chem = trichloroethene; casrn = 79-01-6; r2 = 0.98143

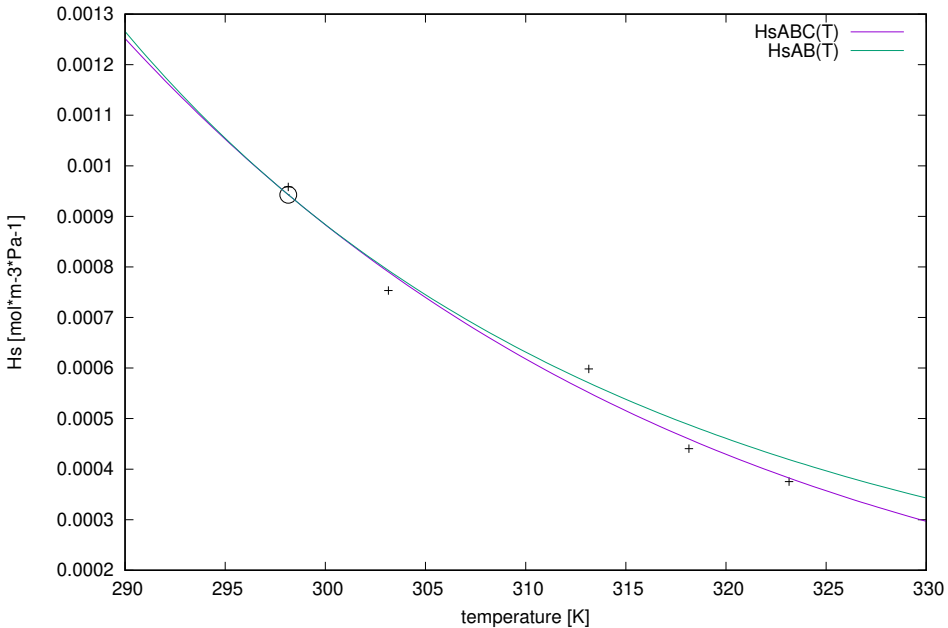

ref = 599; chem = 1,2-dimethylbenzene; casrn = 95-47-6; r2 = 0.98283

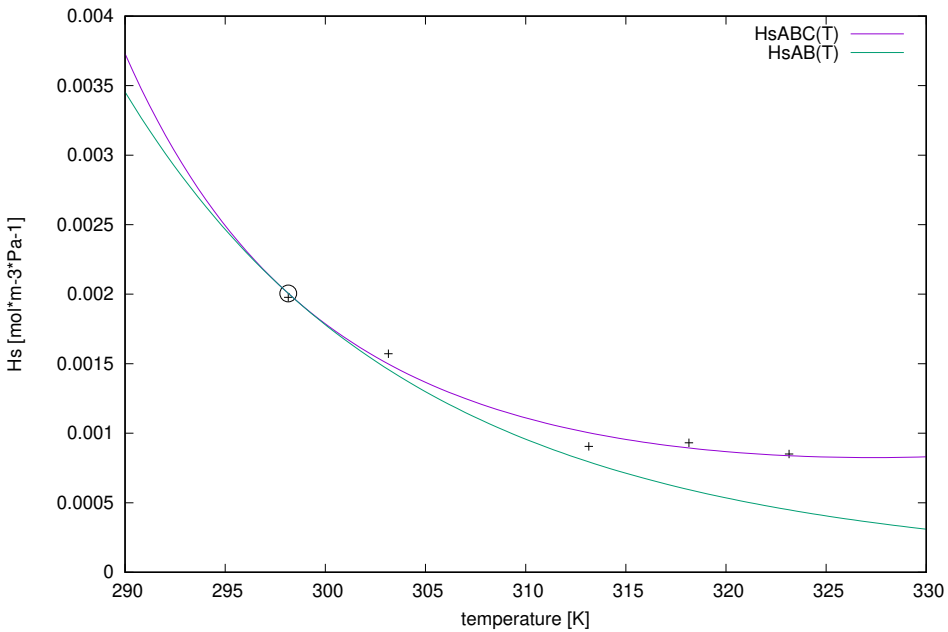

ref = 630; chem = benzaldehyde; casrn = 100-52-7; r2 = 0.99764

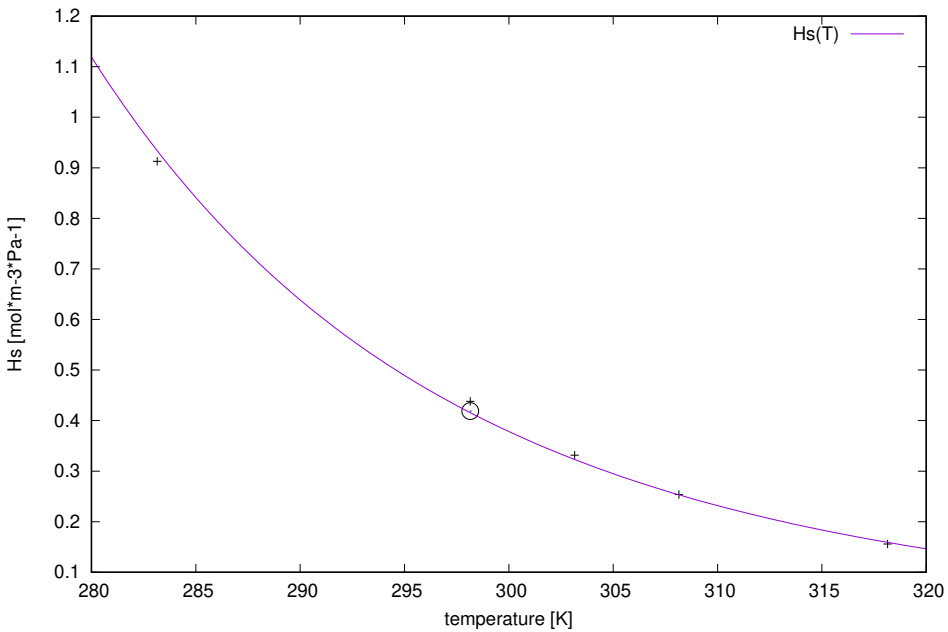

ref = 630; chem = pentanal; casrn = 110-62-3; r2 = 0.99630

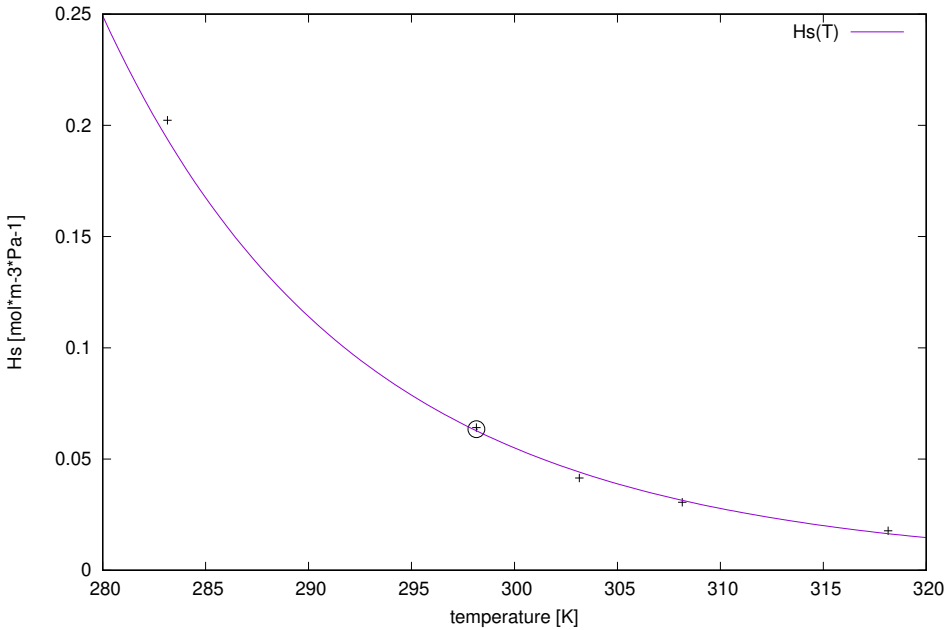

ref = 630; chem = heptanal; casrn = 111-71-7; r2 = 0.99925

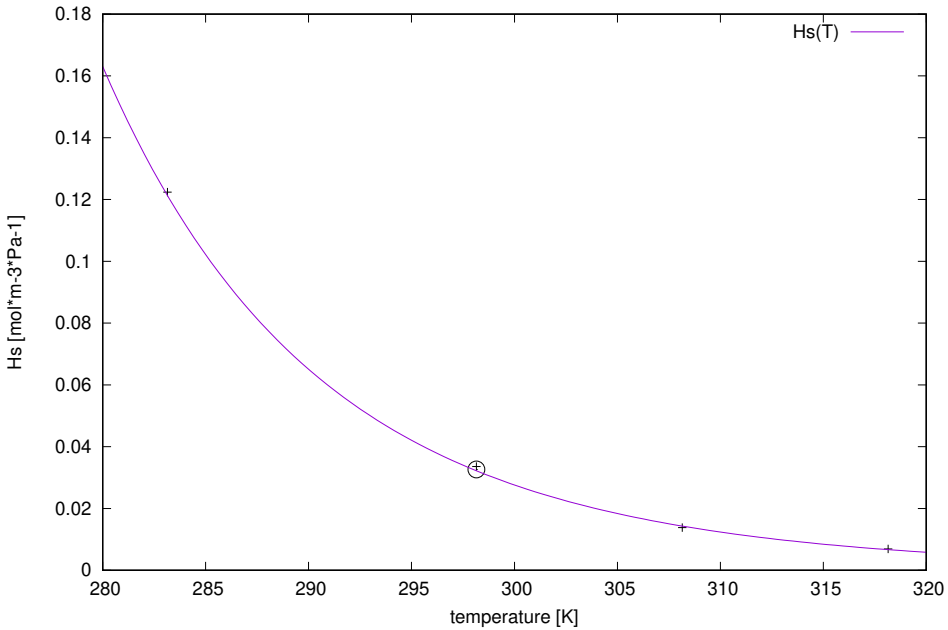

ref = 630; chem = decanal; casrn = 112-31-2; r2 = 0.99594

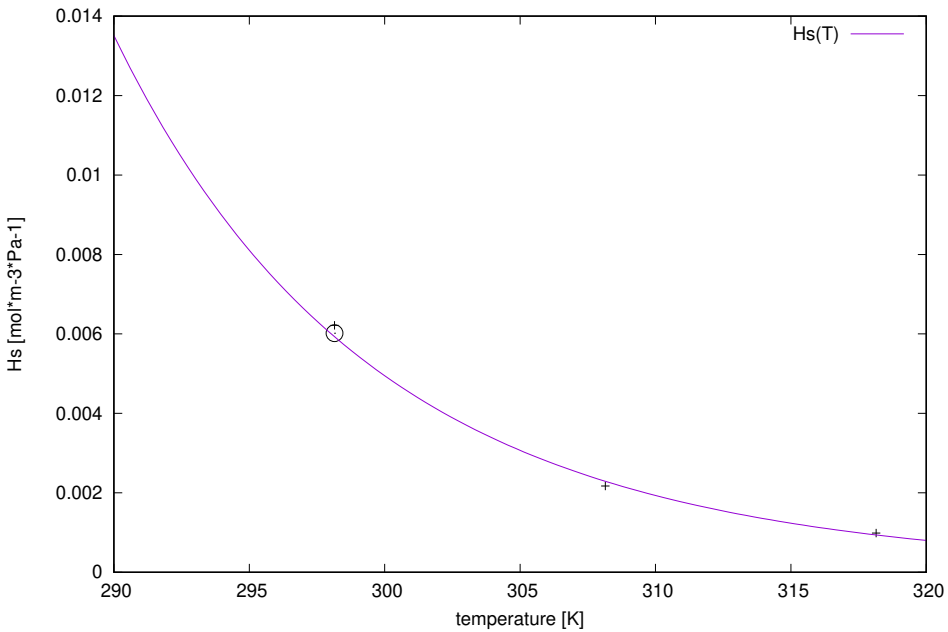

ref = 630; chem = propanal; casrn = 123-38-6; r2 = 0.99383

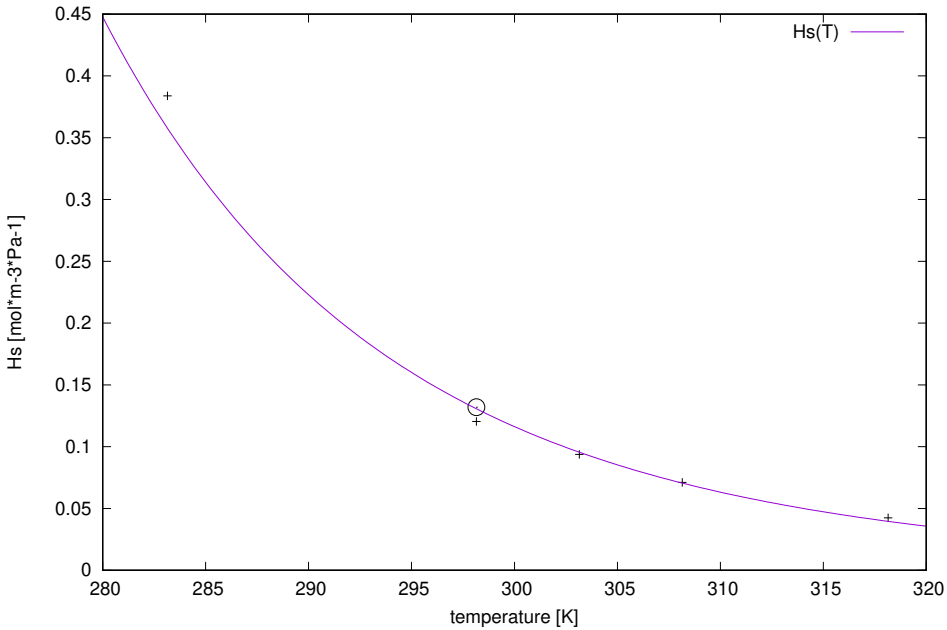



ref = 630; chem = butanal; casrn = 123-72-8; r2 = 0.99208

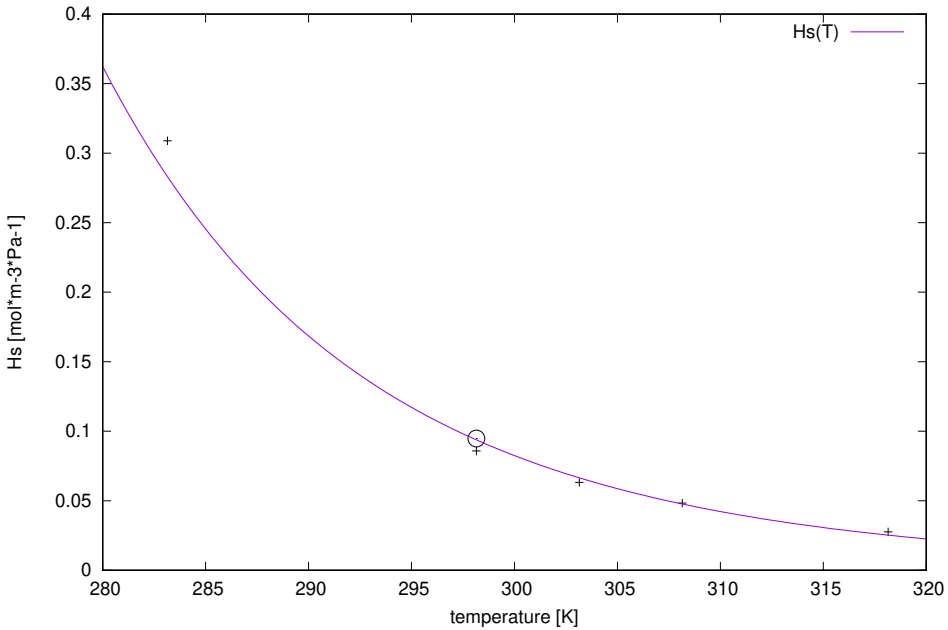

ref = 630; chem = octanal; casrn = 124-13-0; r2 = 0.99844

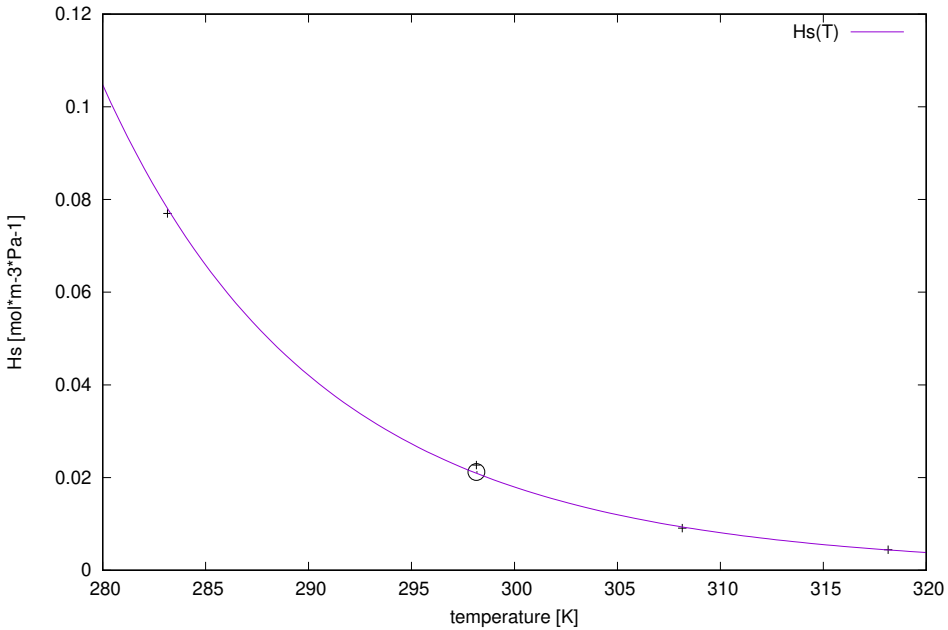

ref = 630; chem = nonanal; casrn = 124-19-6; r2 = 0.98982

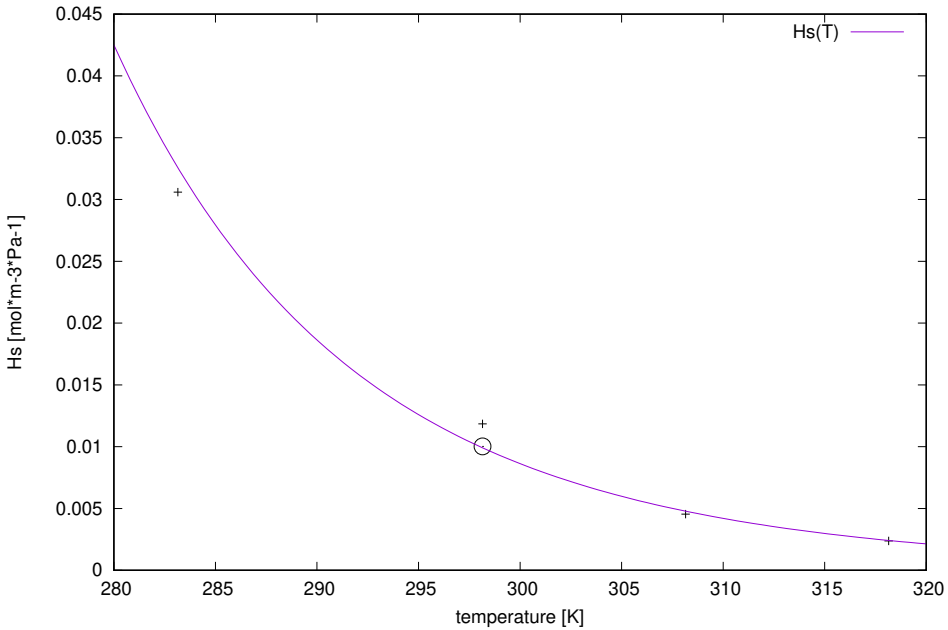

ref = 630; chem = methanal; casrn = 50-00-0; r2 = 0.99616

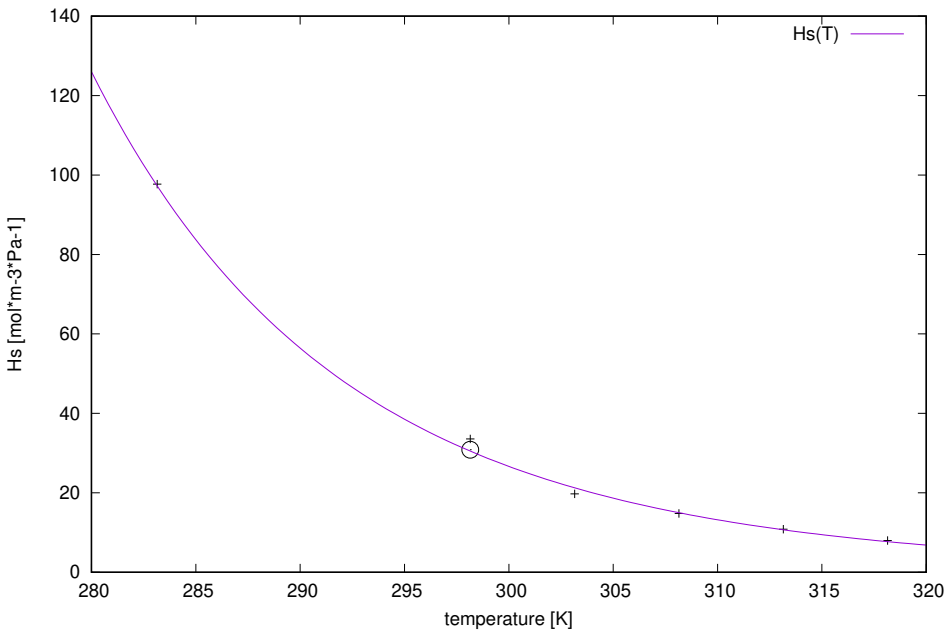

ref = 630; chem = hexanal; casrn = 66-25-1; r2 = 0.99650

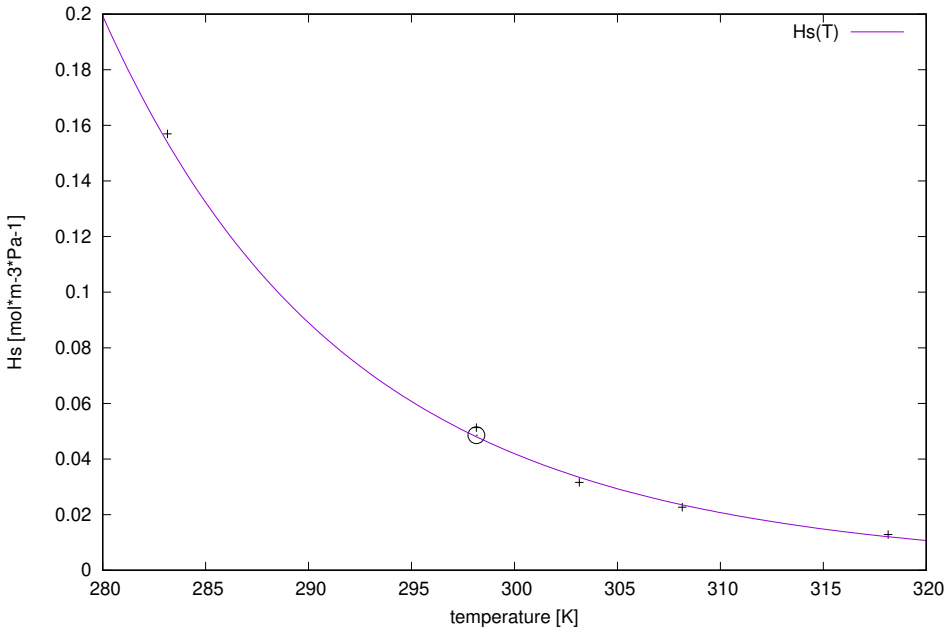

ref = 630; chem = propanone; casrn = 67-64-1; r2 = 0.99526

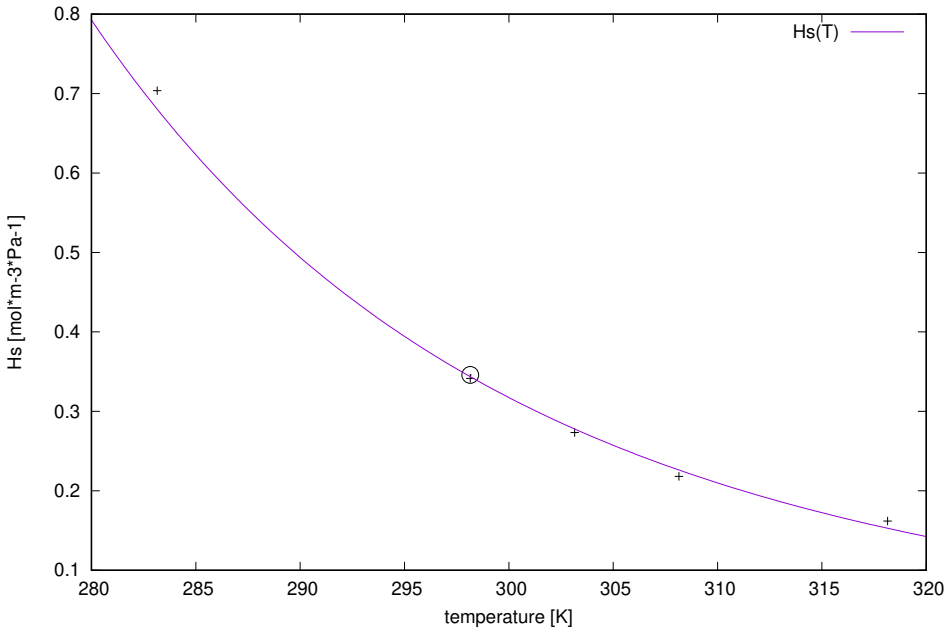

ref = 630; chem = ethanal; casrn = 75-07-0; r2 = 0.98371

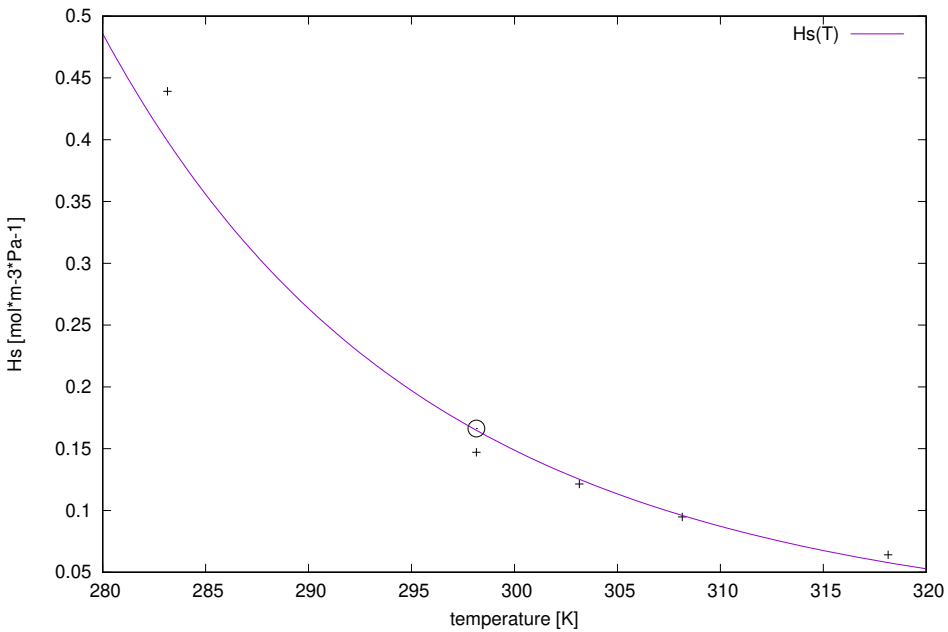

ref = 630; chem = 2-butanone; casrn = 78-93-3; r2 = 0.99682

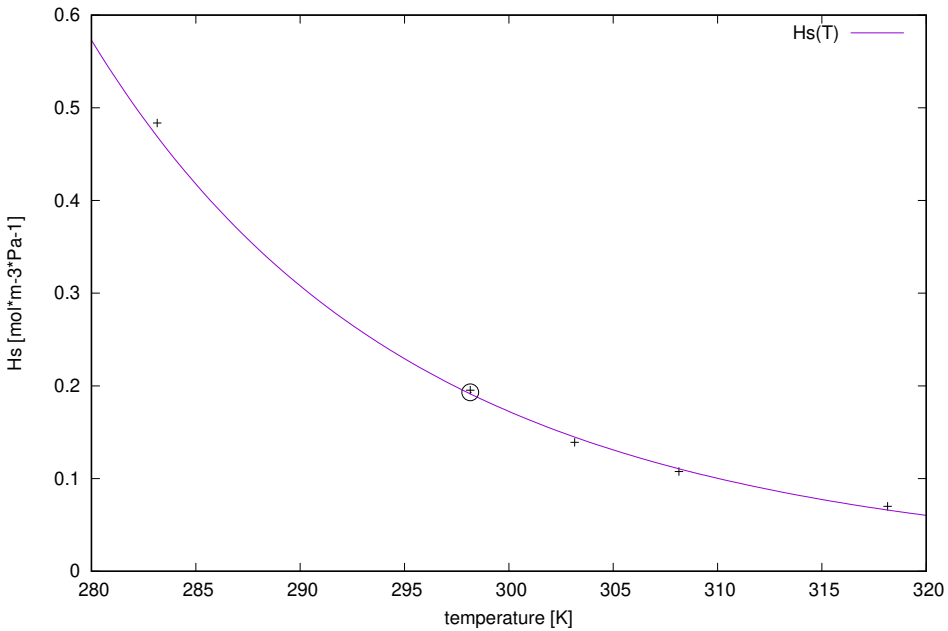



ref = 727; chem = 1,1,1-trifluoro-2-propanol; casrn = 374-01-6; r2 = 0.99936

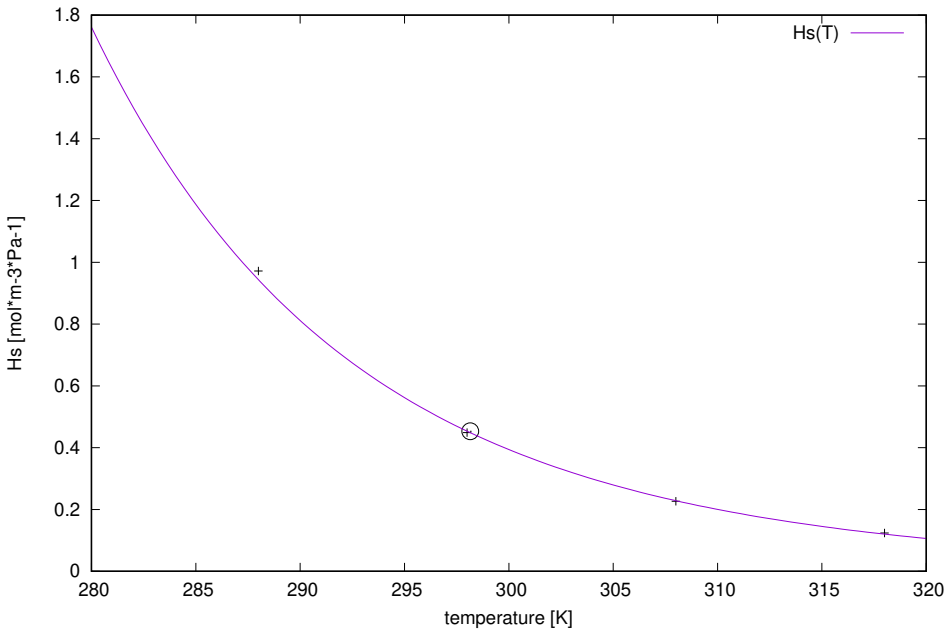

ref = 727; chem = 2,2,3,3,3-pentafluoro-1-propanol; casrn = 422-05-9; r2 = 0.99886

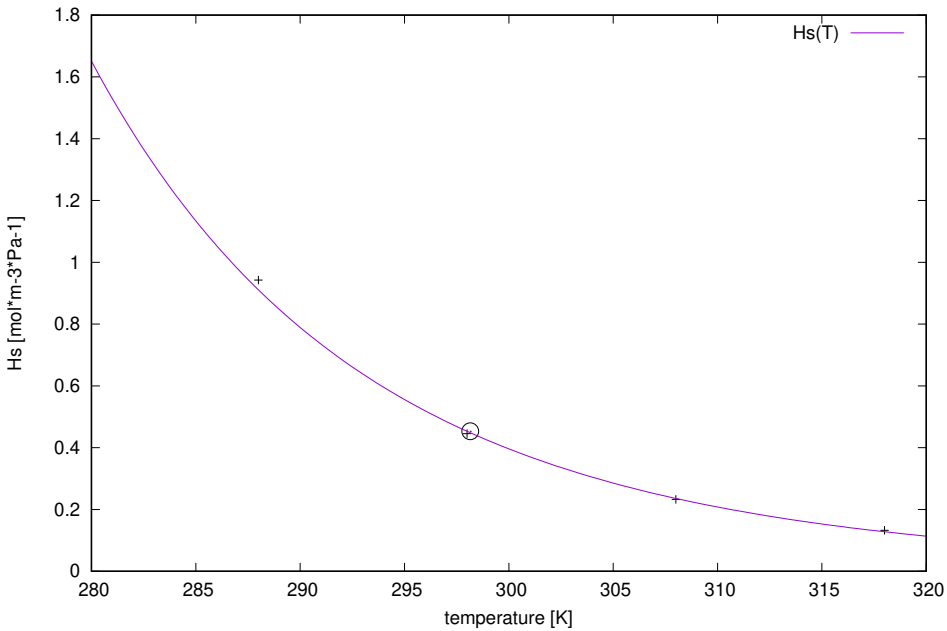

ref = 727; chem = 2,2,2-trifluoroethanol; casrn = 75-89-8; r2 = 0.99922

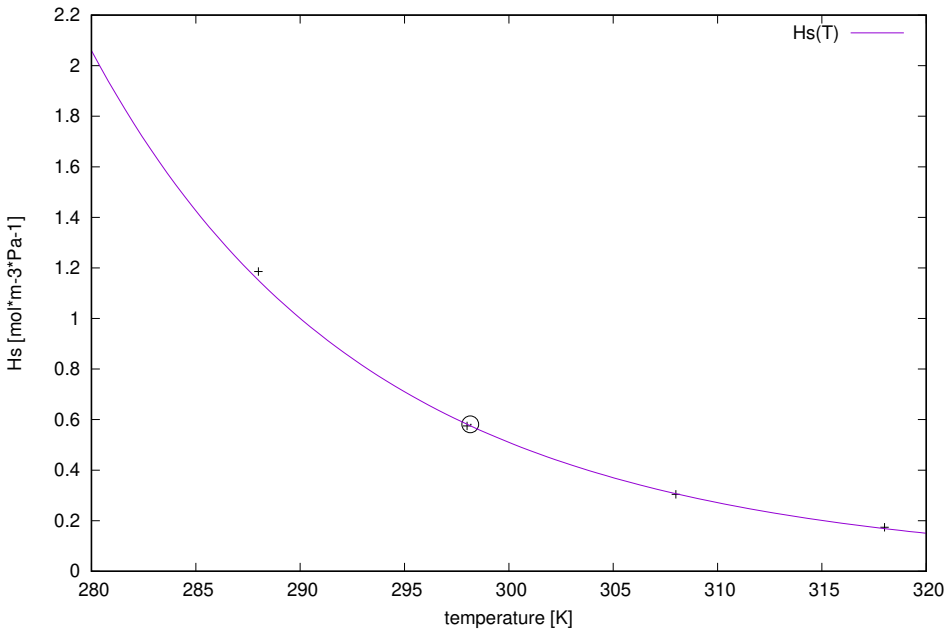

ref = 727; chem = 2,2,3,3-tetrafluoro-1-propanol; casrn = 76-37-9; r2 = 0.99885

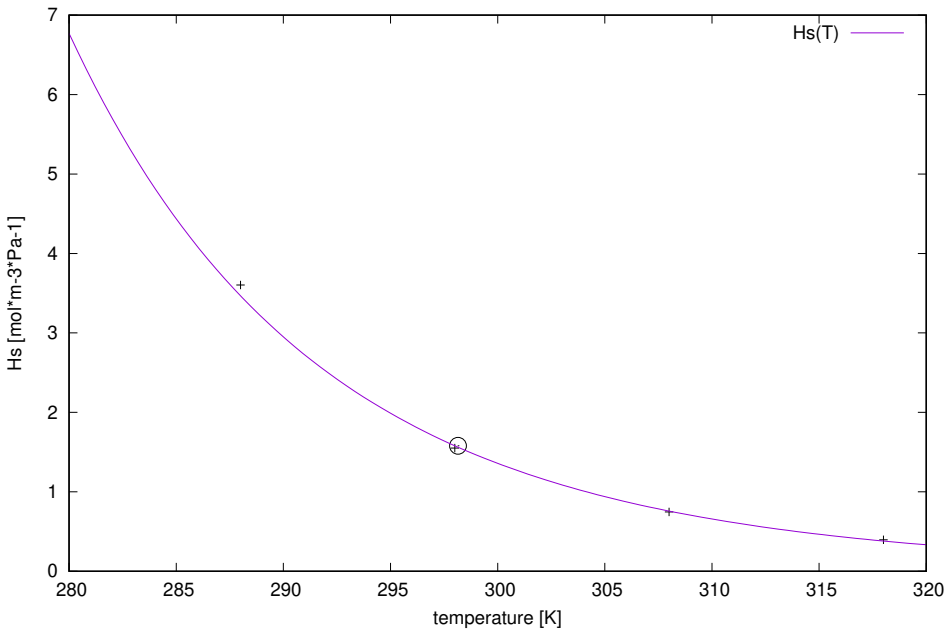

ref = 727; chem = 1,1,1,3,3,3-hexafluoro-2-propanol; casrn = 920-66-1; r2 = 0.99903

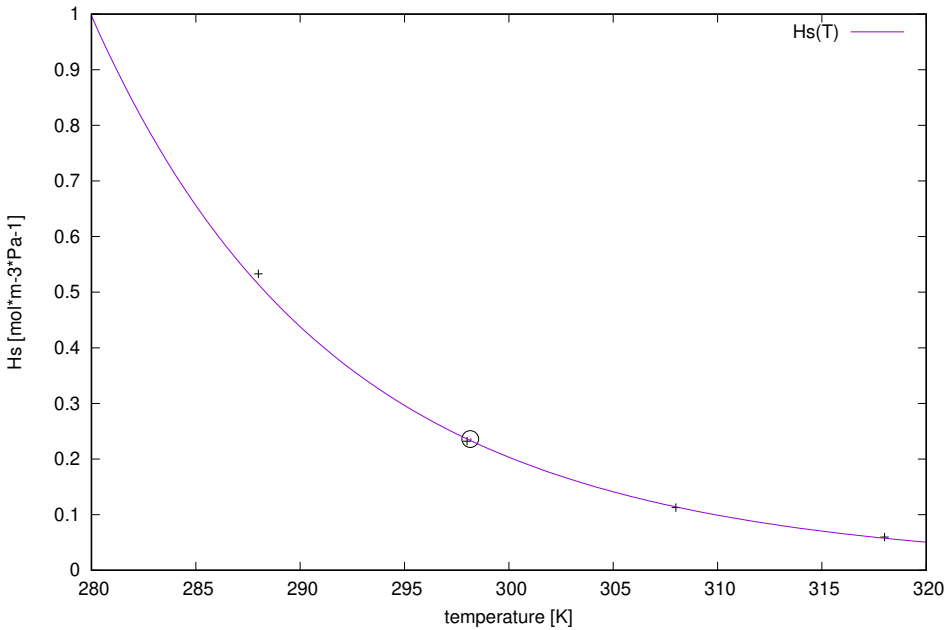

ref = 732; chem = nitrogen monoxide; casrn = 10102-43-9; r2 = 0.99989

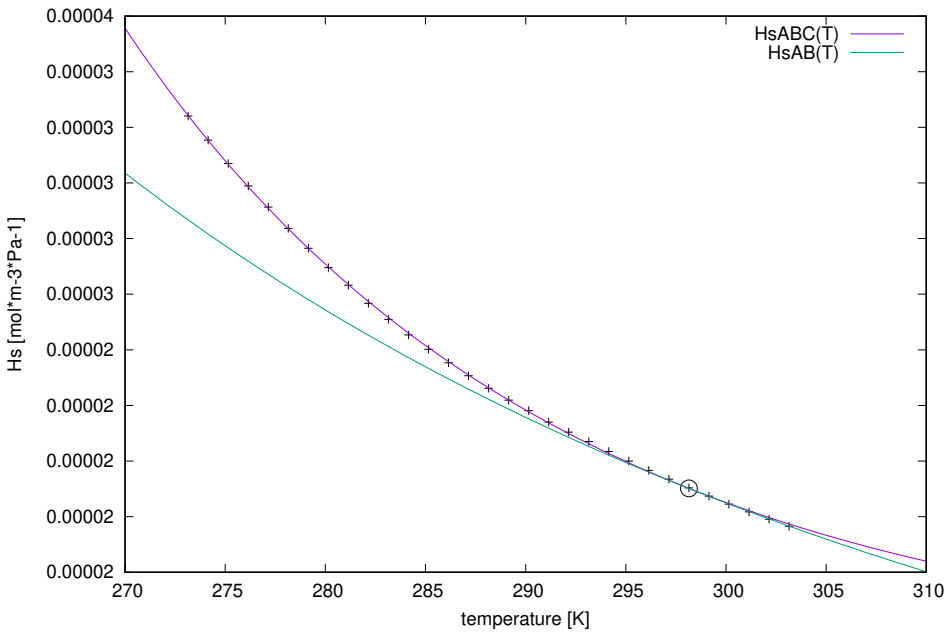

ref = 753; chem = molecular bromine; casrn = 7726-95-6; r2 = 0.98198

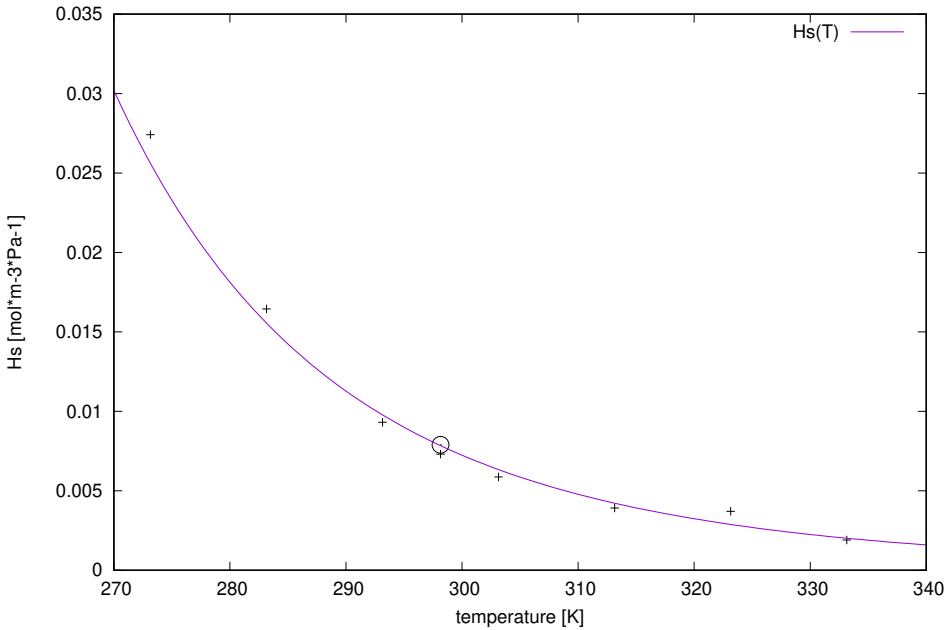

ref = 759; chem = bromine chloride; casrn = 13863-41-7; r2 = 0.98056

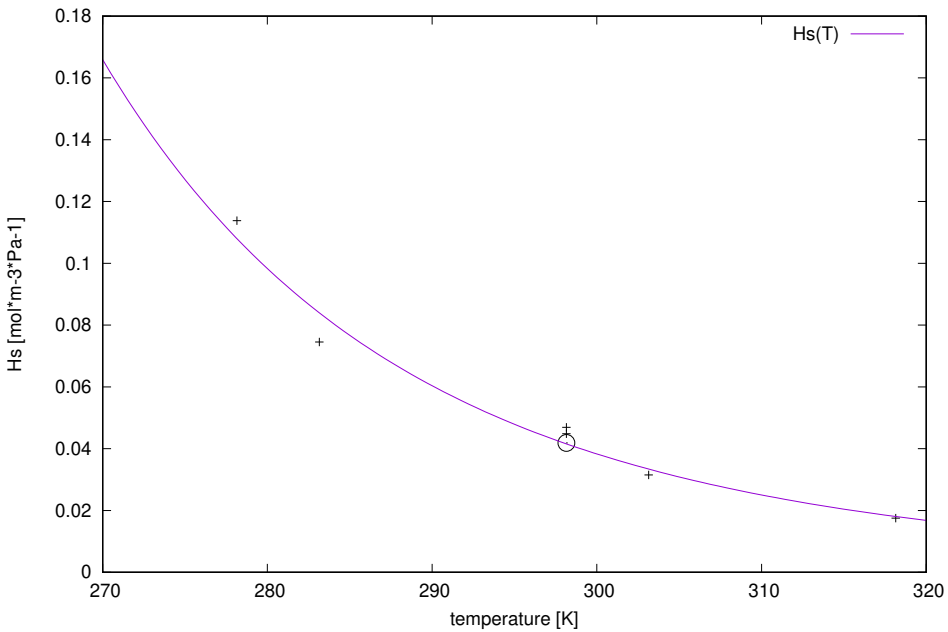



ref = 759; chem = molecular bromine; casrn = 7726-95-6; r2 = 0.99336

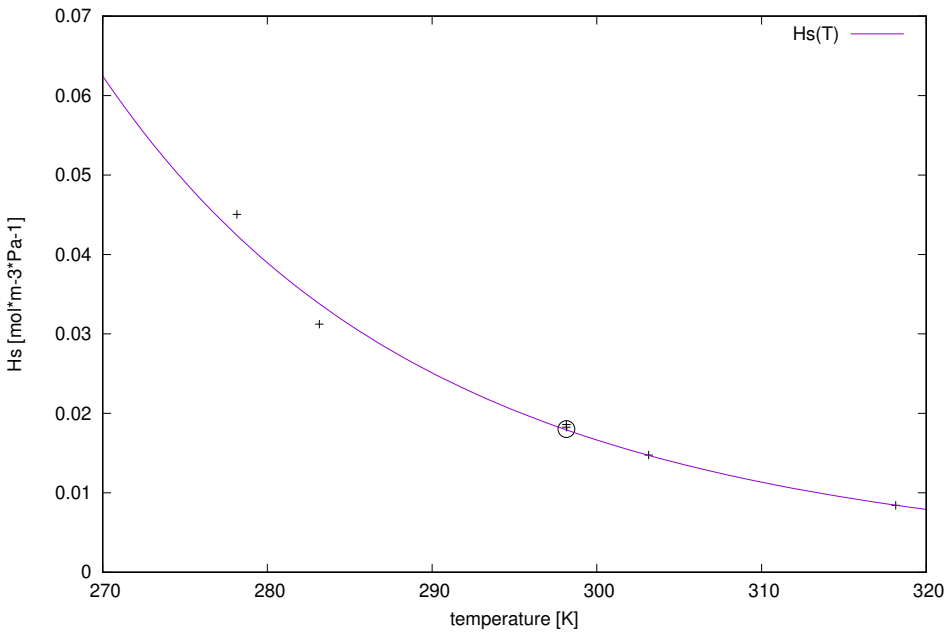

ref = 764; chem = krypton; casrn = 7439-90-9; r2 = 0.99975

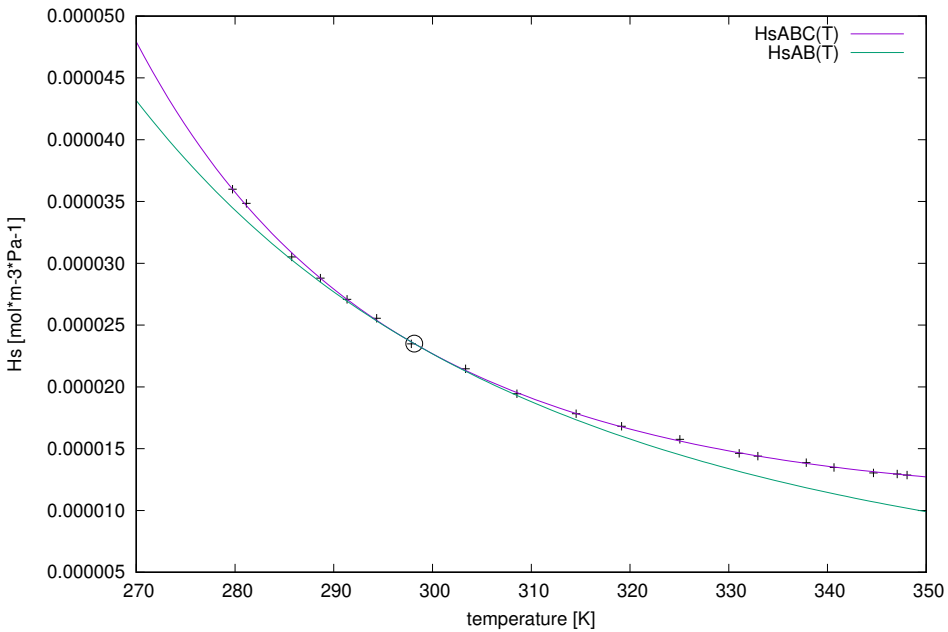

ref = 764; chem = neon; casrn = 7440-01-9; r2 = 0.99339

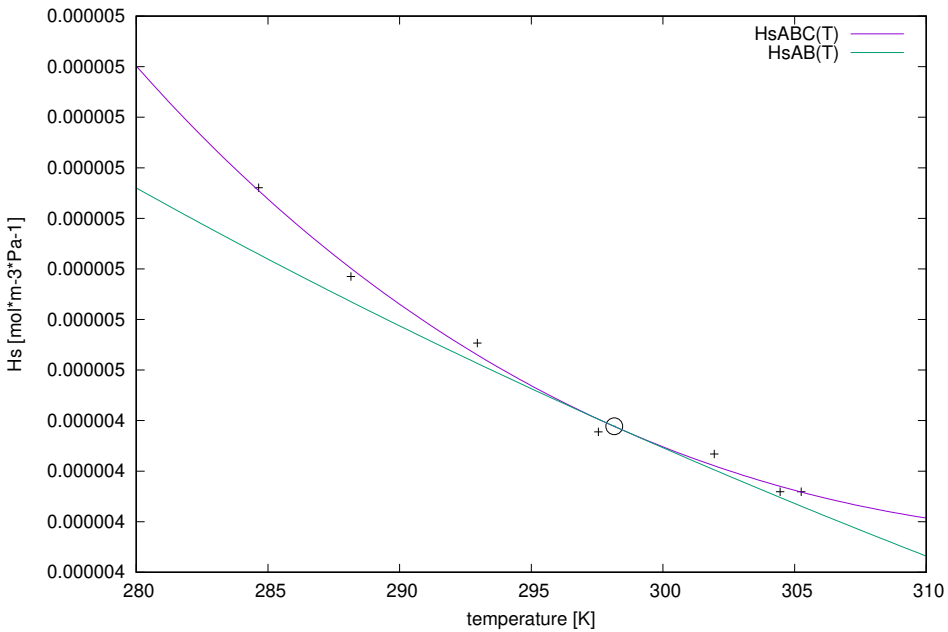

ref = 764; chem = argon; casrn = 7440-37-1; r2 = 0.99923

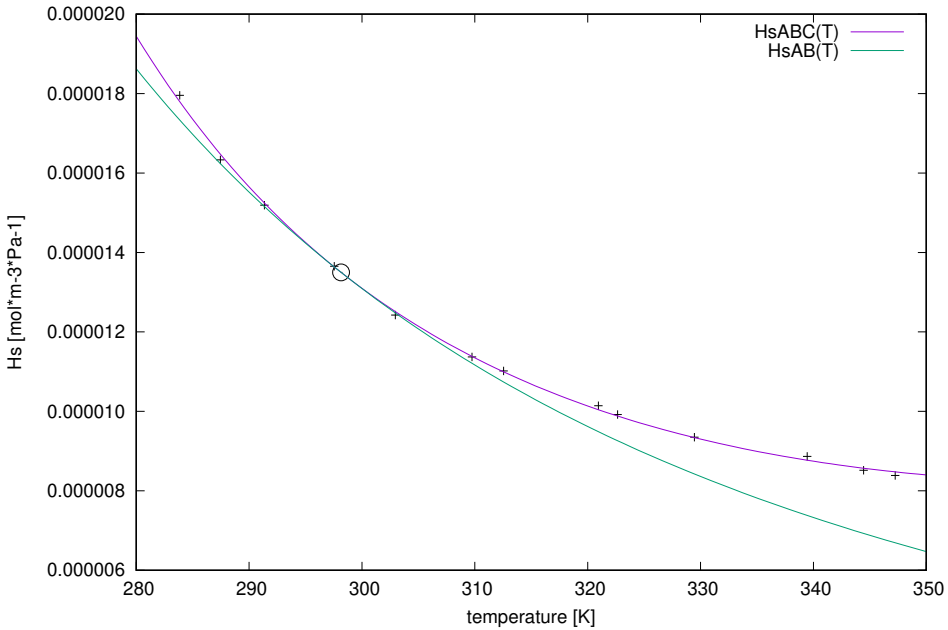

ref = 764; chem = helium; casrn = 7440-59-7; r2 = 0.99895

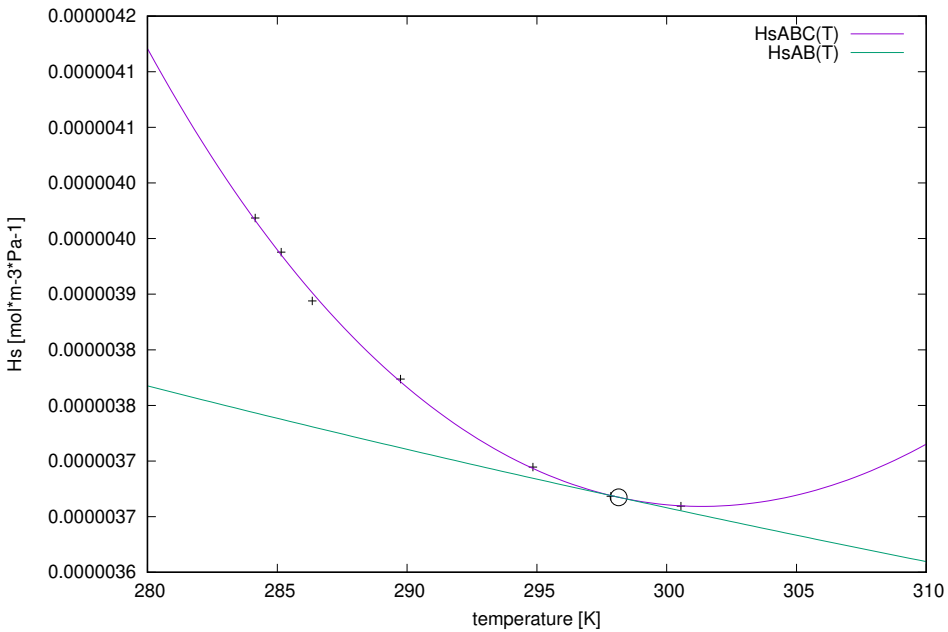

ref = 764; chem = xenon; casrn = 7440-63-3; r2 = 0.99902

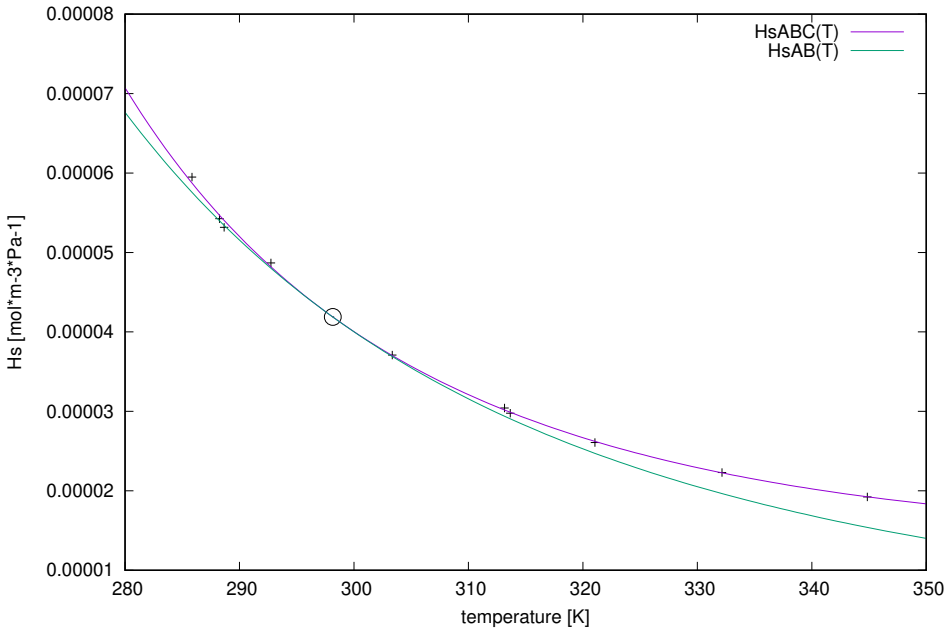

ref = 764; chem = tetrafluoromethane; casrn = 75-73-0; r2 = 0.99990

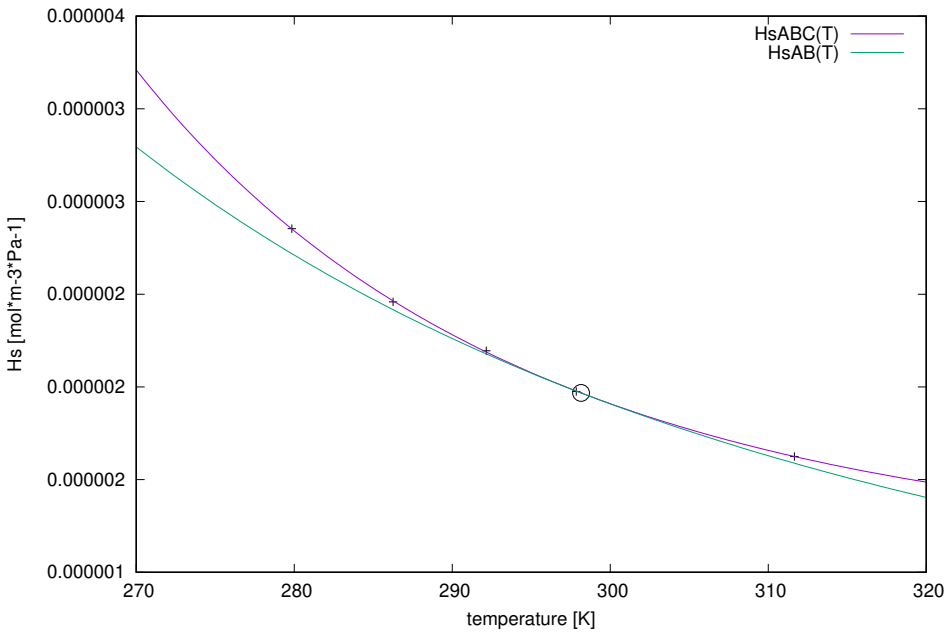

ref = 791; chem = 1,4-dimethylbenzene; casrn = 106-42-3; r2 = 0.99979

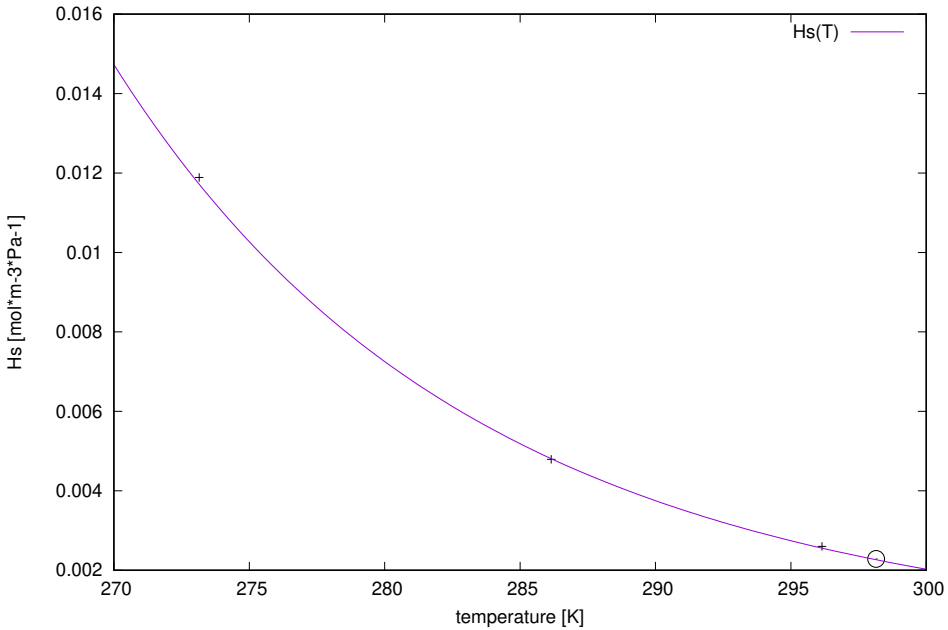



ref = 791; chem = benzene-d6; casrn = 1076-43-3; r2 = 1.00000

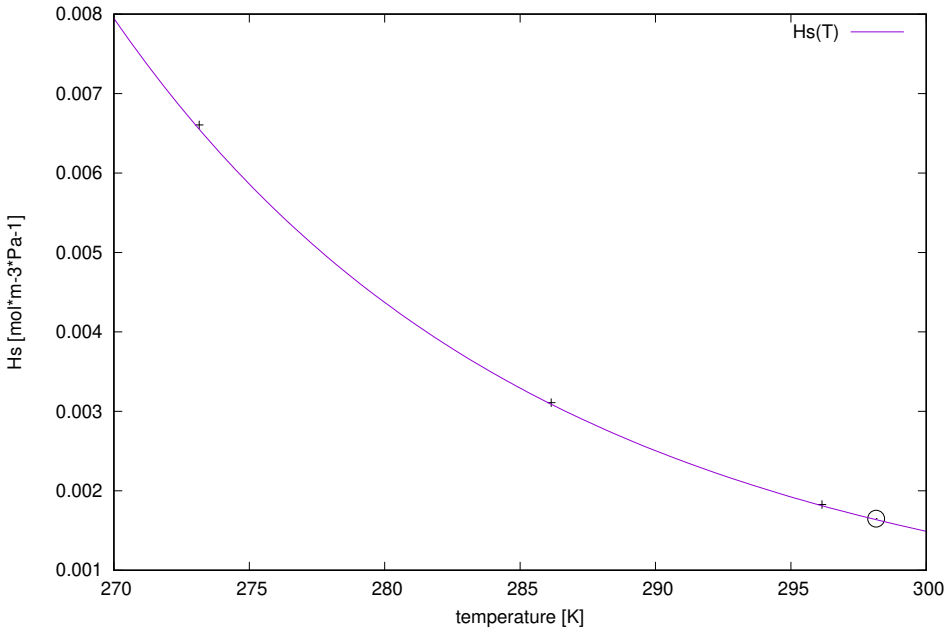

ref = 791; chem = methylbenzene; casrn = 108-88-3; r2 = 0.99996

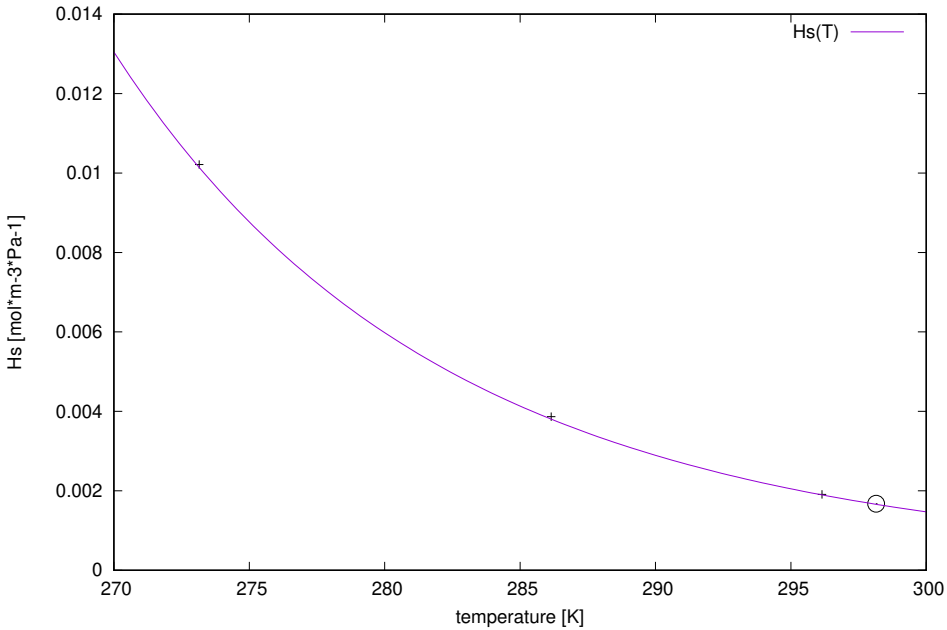

ref = 791; chem = benzene; casrn = 71-43-2; r2 = 0.99991

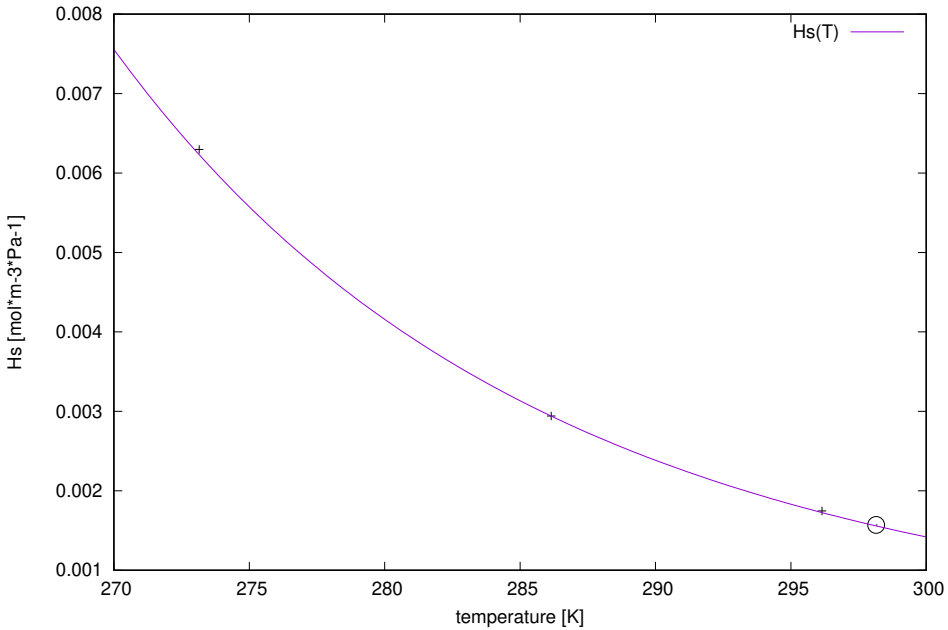

ref = 791; chem = 1,2-dimethylbenzene; casrn = 95-47-6; r2 = 0.99999

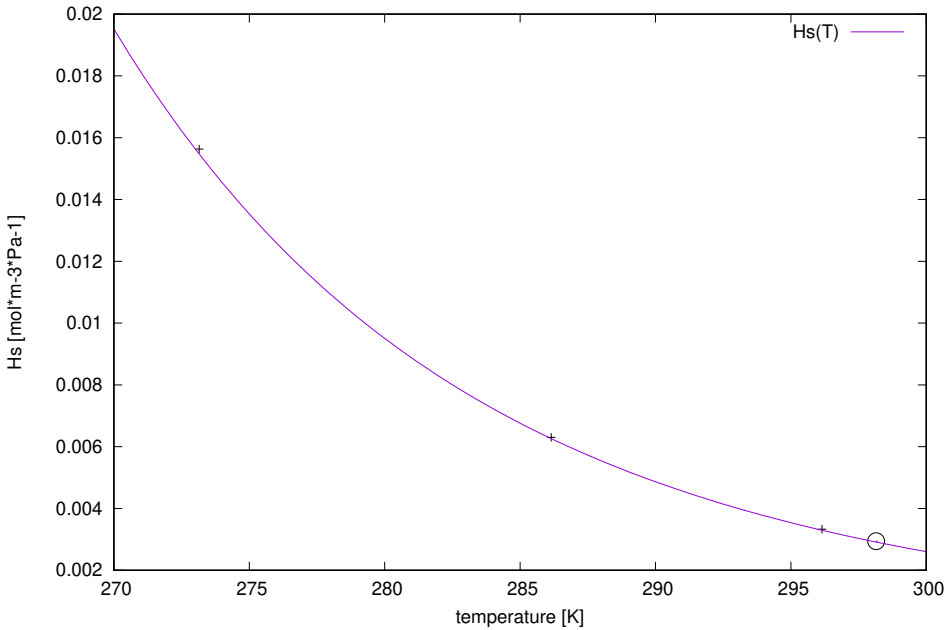

ref = 800; chem = hydroxymethyl hydroperoxide; casrn = 15932-89-5; r2 = 1.00000

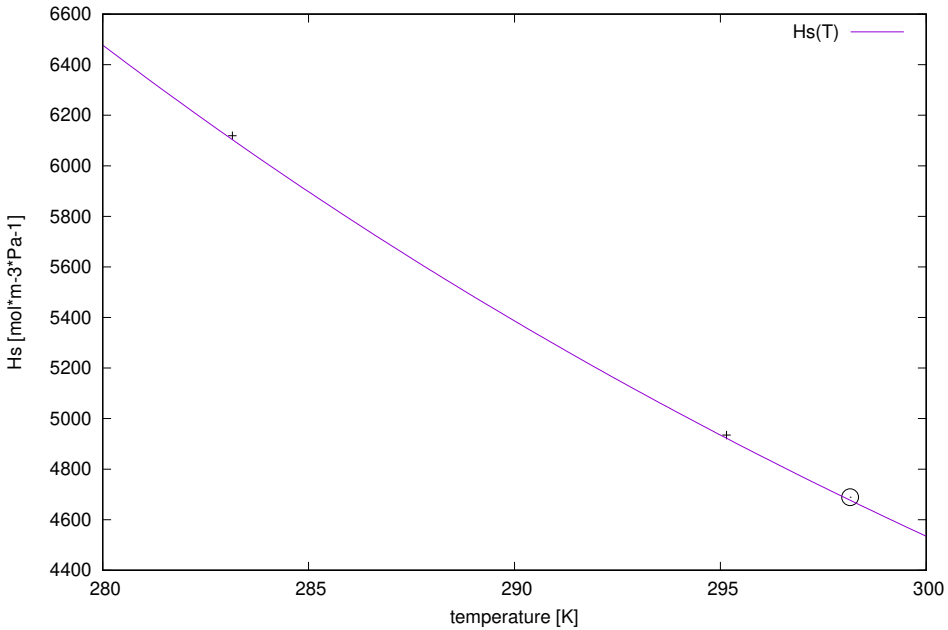

ref = 800; chem = bis(hydroxymethyl)peroxide; casrn = 17088-73-2; r2 = 1.00000

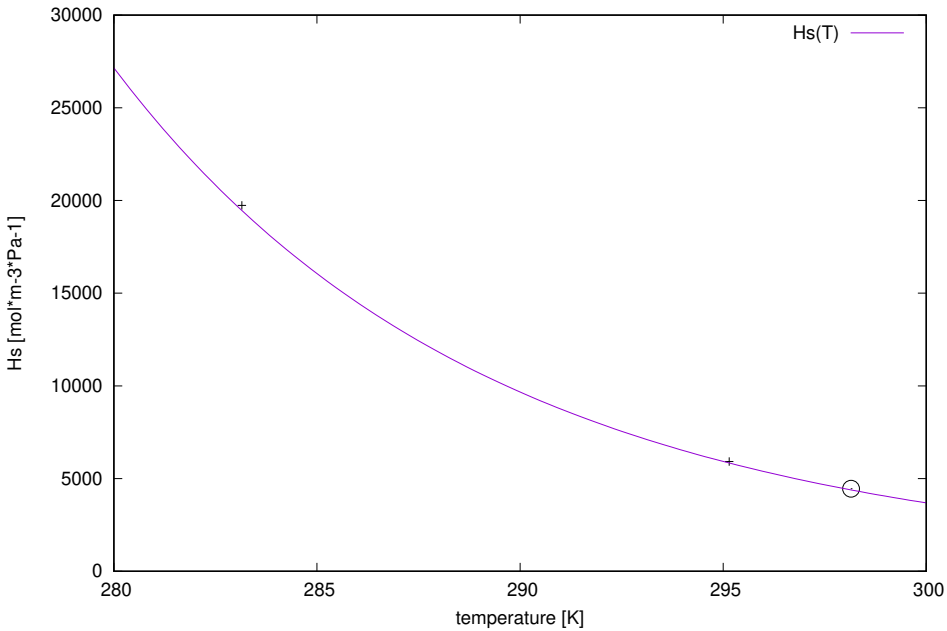

ref = 800; chem = hydrogen peroxide; casrn = 7722-84-1; r2 = 1.00000

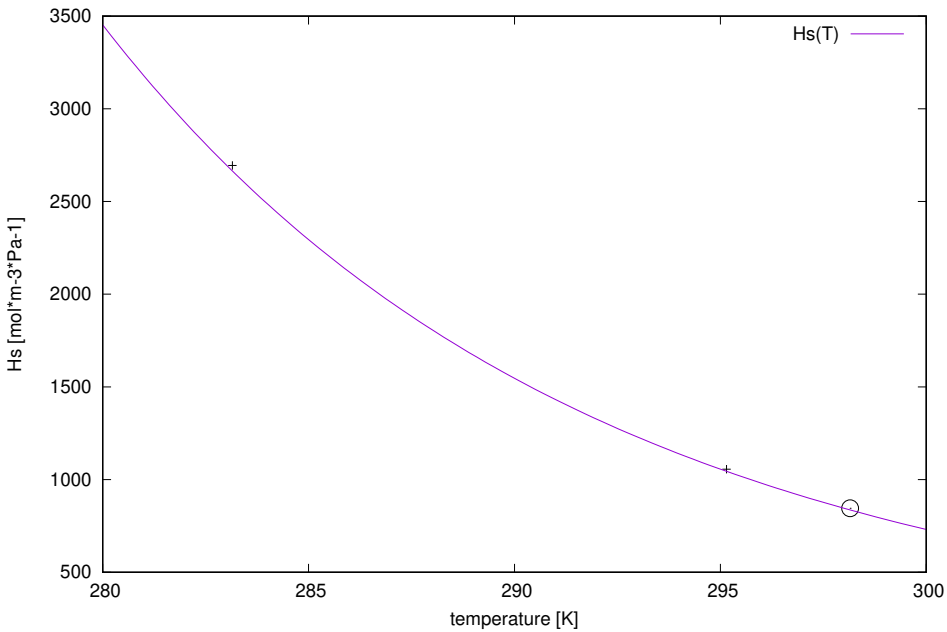

ref = 821; chem = sulfur dioxide; casrn = 7446-09-5; r2 = 0.99820

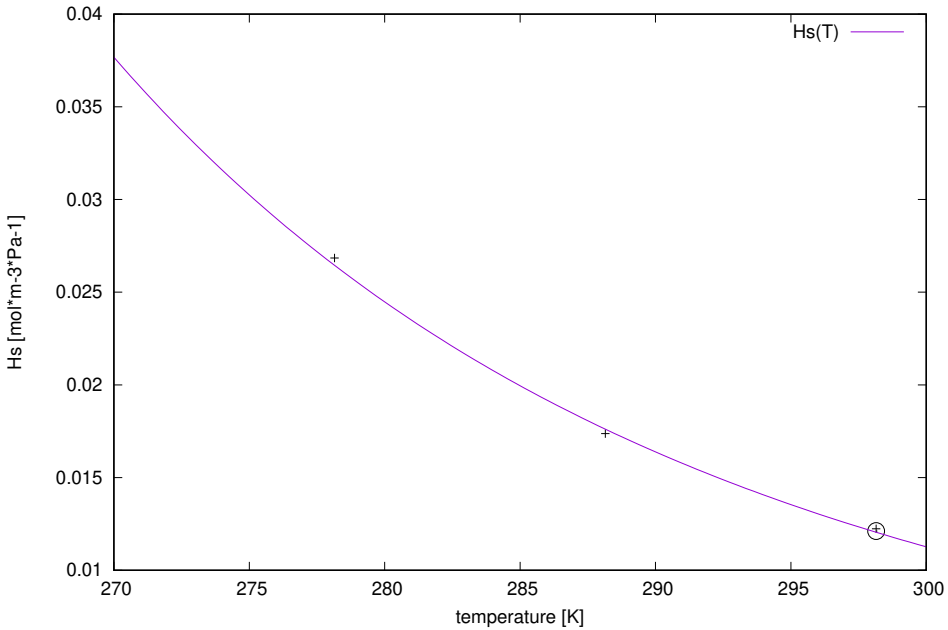



ref = 824; chem = dimethylsulfoxide; casrn = 67-68-5; r2 = 0.96884

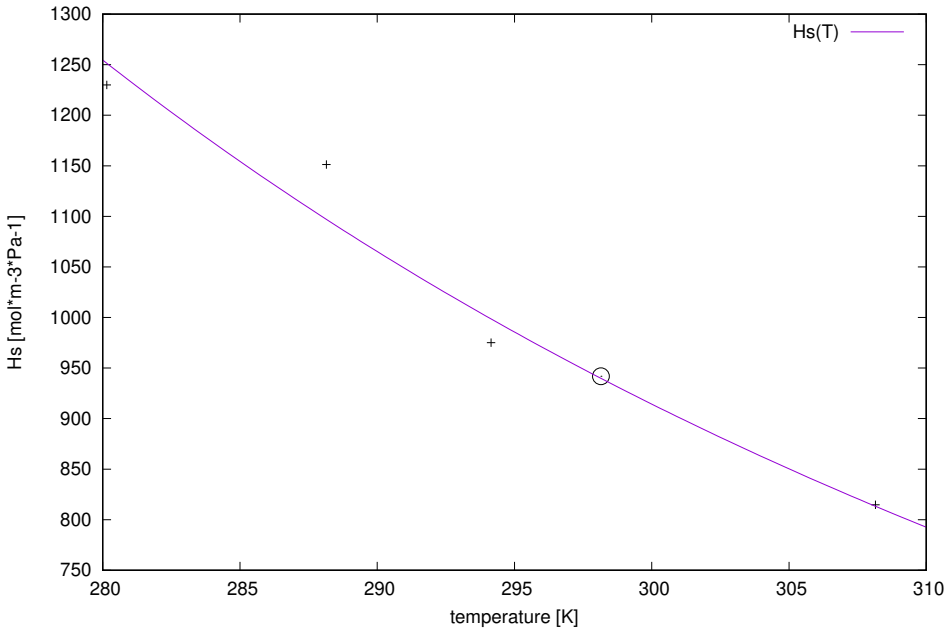

ref = 855; chem = 1,2-dichloroethane; casrn = 107-06-2; r2 = 1.00000

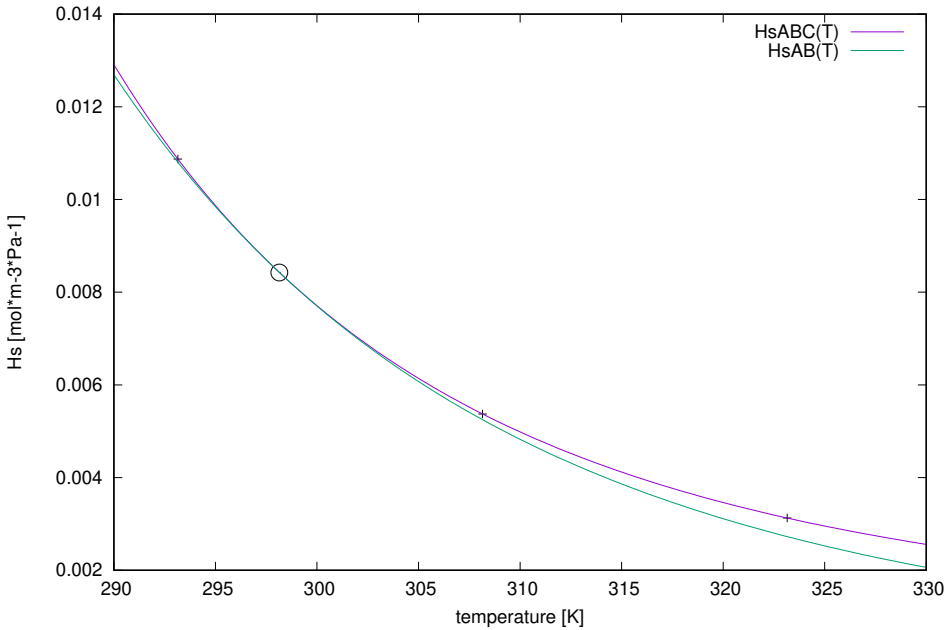

ref = 855; chem = (Z)-1,2-dichloroethene; casrn = 156-59-2; r2 = 1.00000

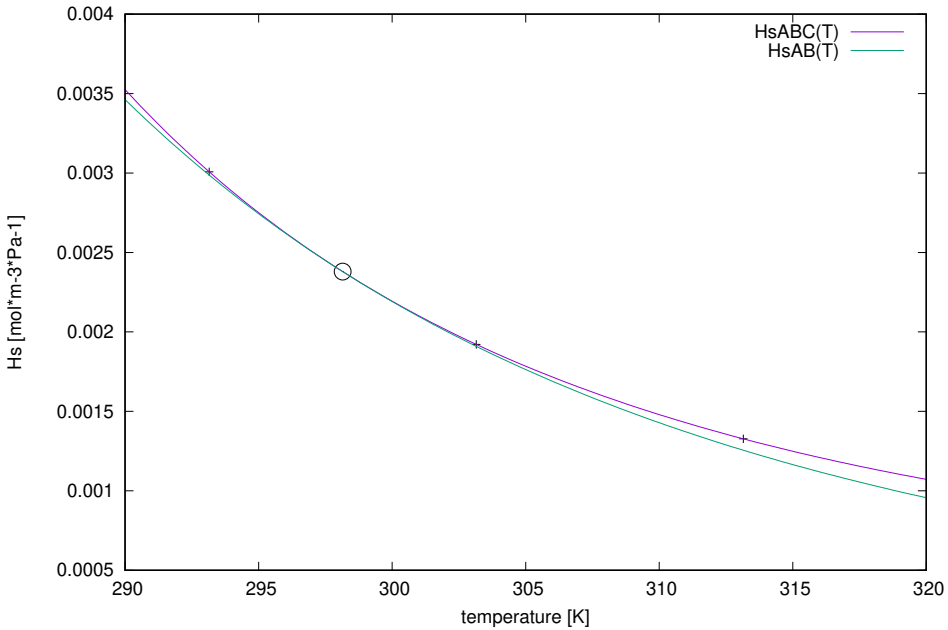

ref = 855; chem = (E)-1,2-dichloroethene; casrn = 156-60-5; r2 = 1.00000

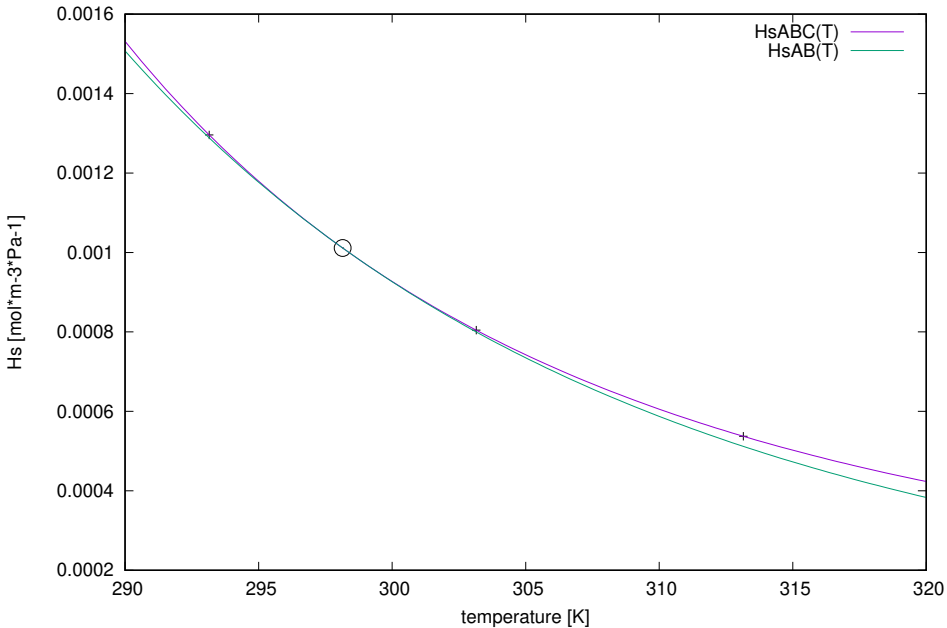

ref = 855; chem = 1,3-dichloropropene; casrn = 542-75-6; r2 = 1.00000

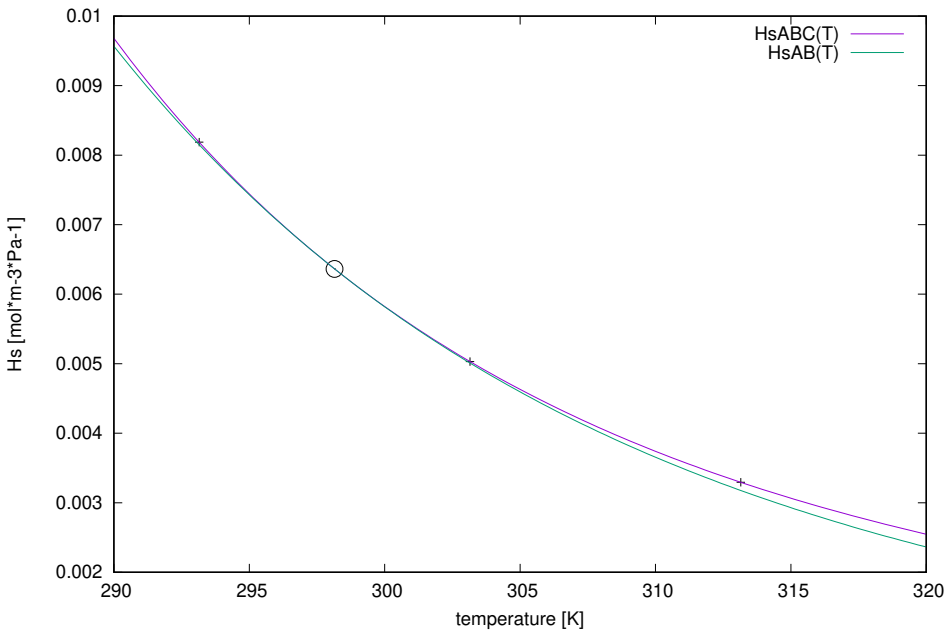

ref = 855; chem = tetrachloromethane; casrn = 56-23-5; r2 = 1.00000

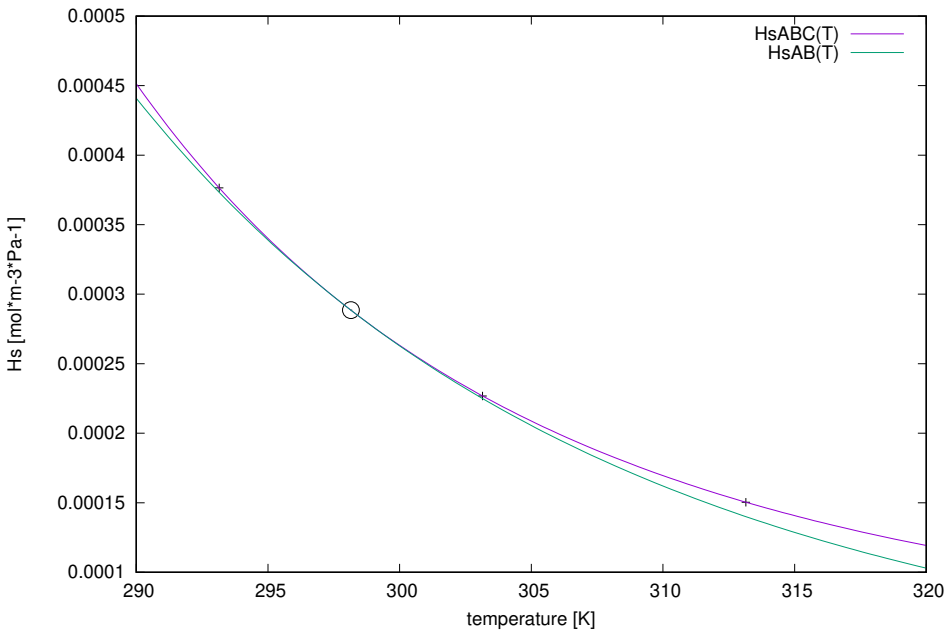

ref = 855; chem = 1,1,1,2-tetrachloroethane; casrn = 630-20-6; r2 = 1.00000

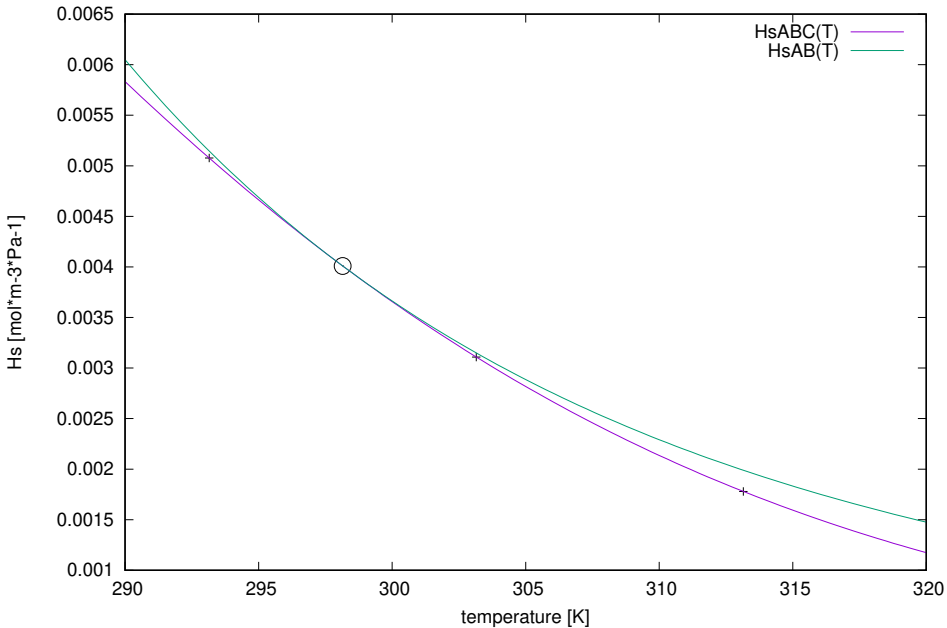

ref = 855; chem = trichloromethane; casrn = 67-66-3; r2 = 1.00000

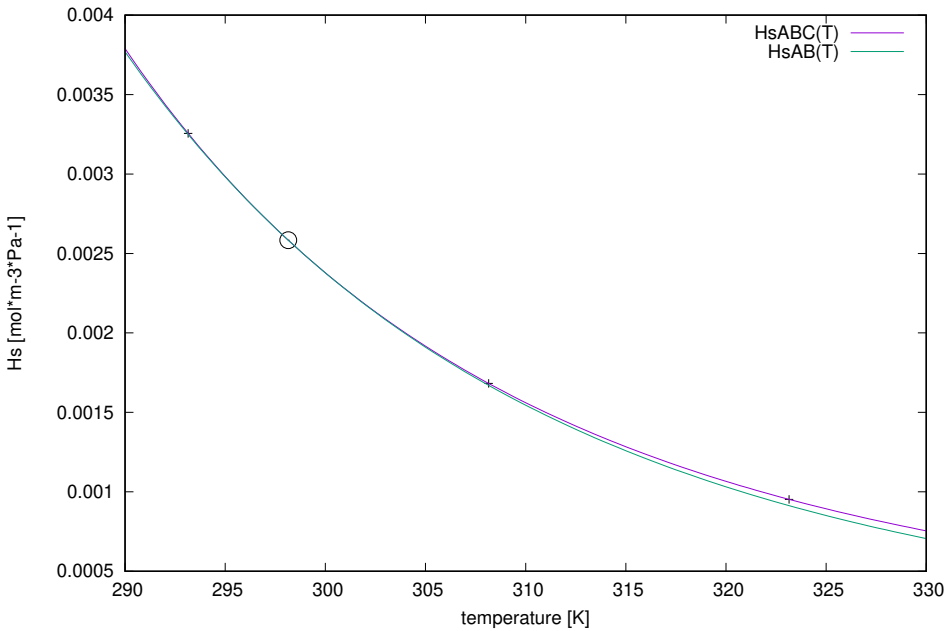



ref = 855; chem = 1,1,1-trichloroethane; casrn = 71-55-6; r2 = 1.00000

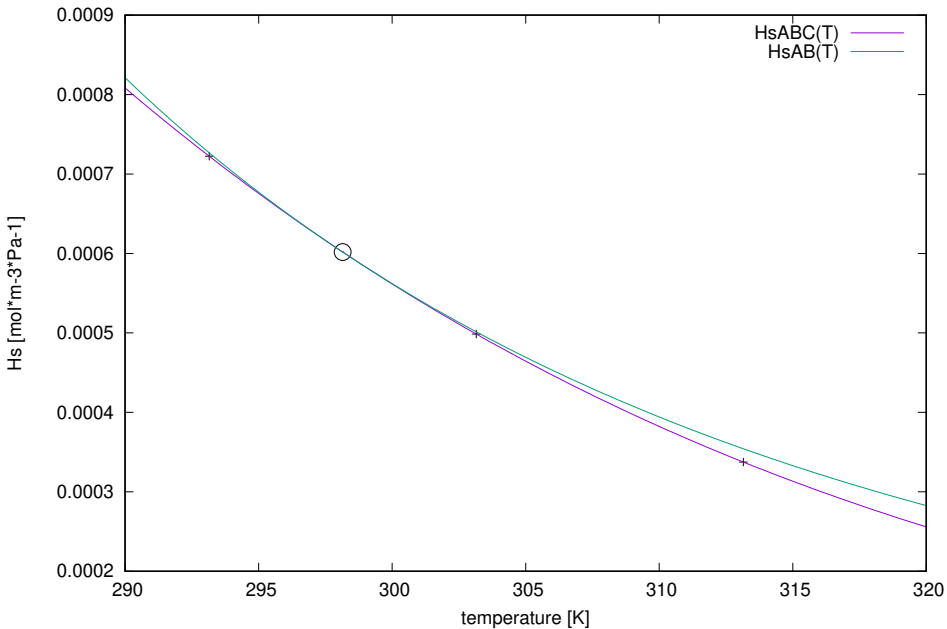

ref = 855; chem = dibromomethane; casrn = 74-95-3; r2 = 1.00000

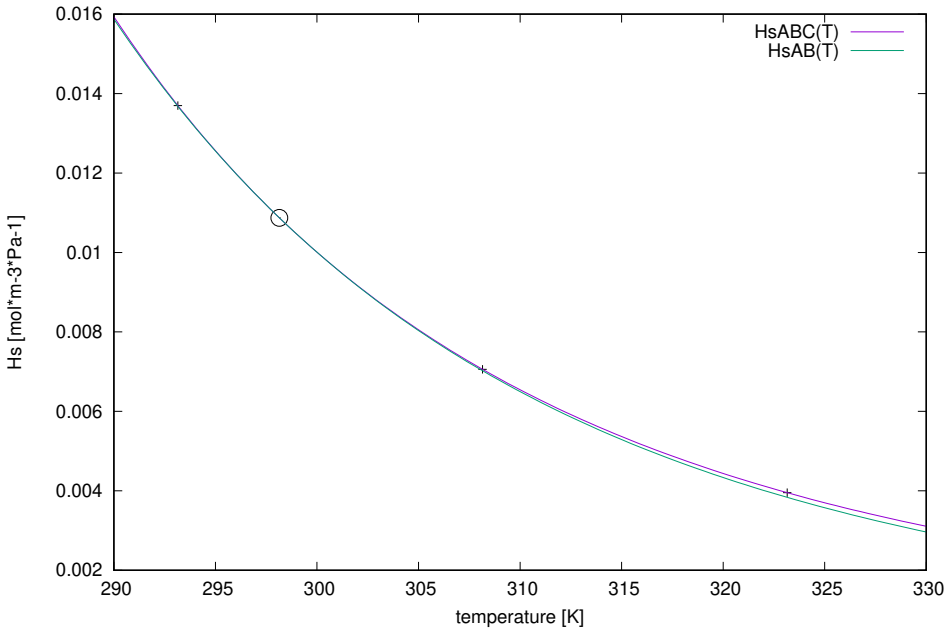

ref = 855; chem = dichloromethane; casrn = 75-09-2; r2 = 1.00000

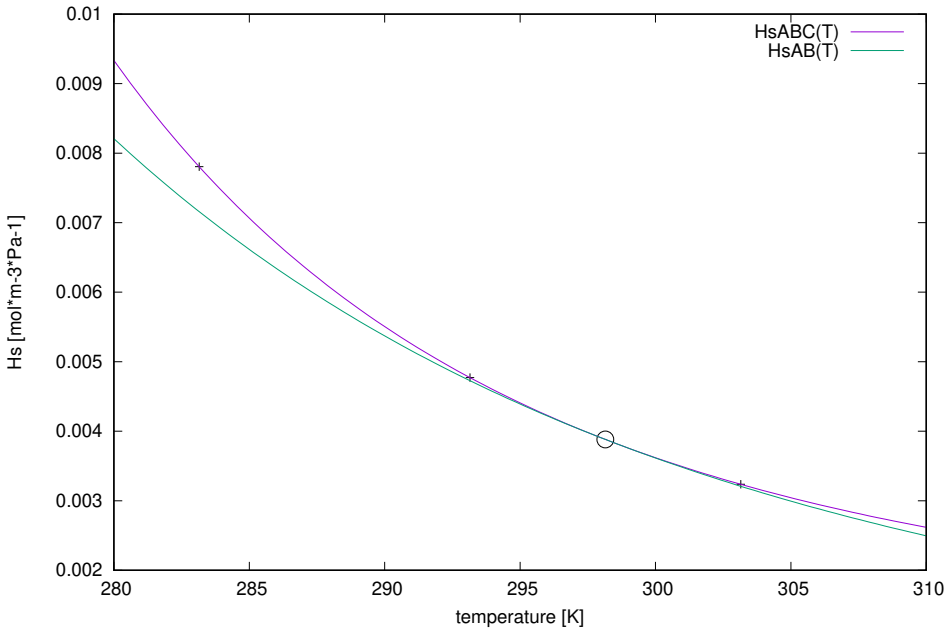

ref = 855; chem = tribromomethane; casrn = 75-25-2; r2 = 1.00000

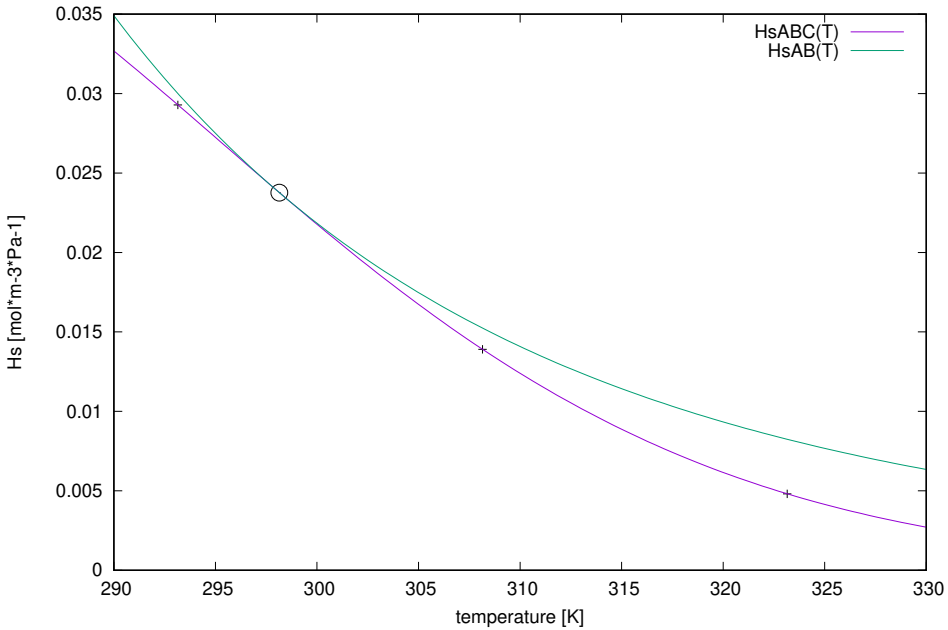

ref = 855; chem = 1,1-dichloroethane; casrn = 75-34-3; r2 = 1.00000

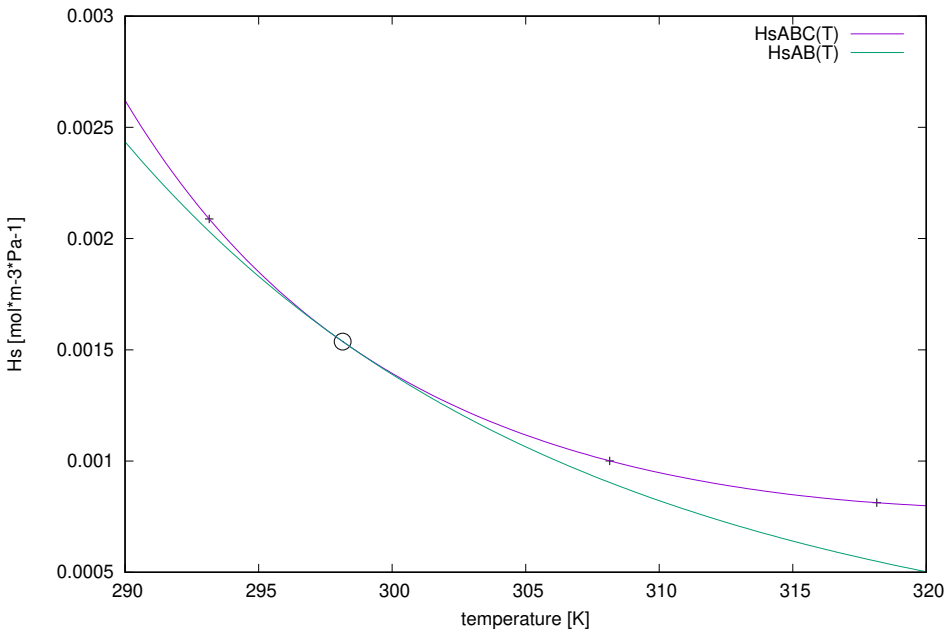

ref = 855; chem = 1,2-dichloropropane; casrn = 78-87-5; r2 = 1.00000

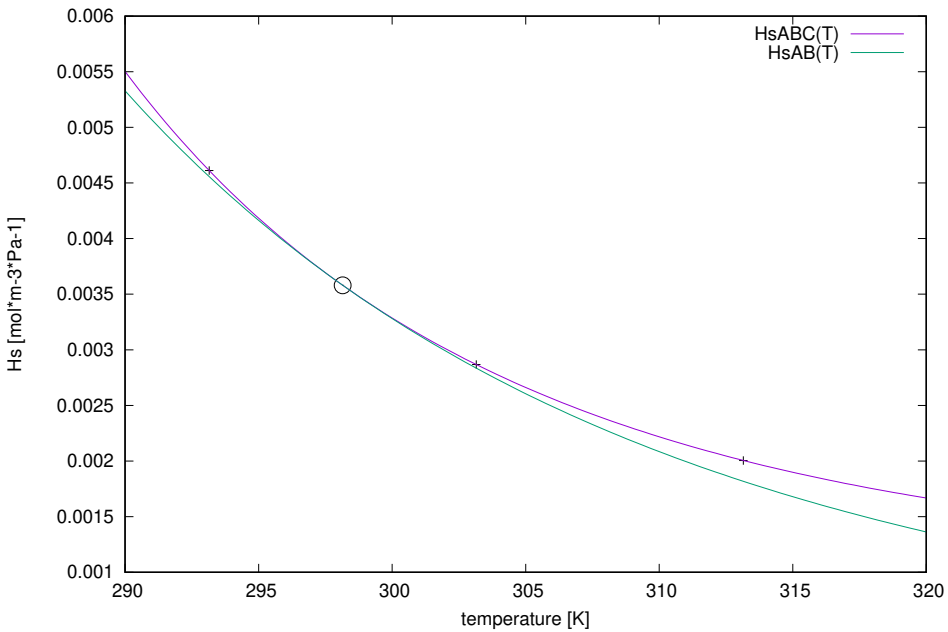

ref = 855; chem = 1,1,2-trichloroethane; casrn = 79-00-5; r2 = 1.00000

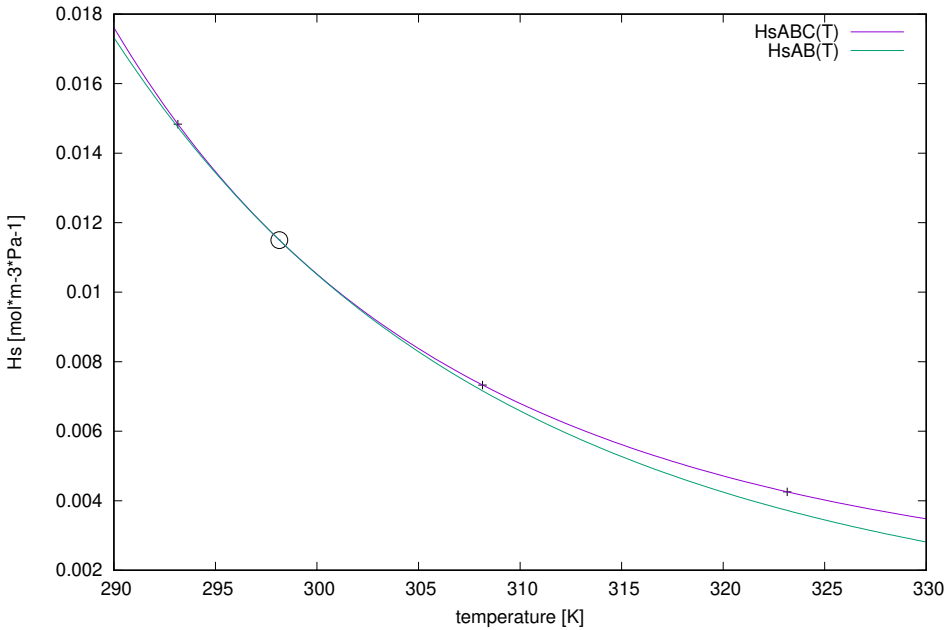

ref = 855; chem = trichloroethene; casrn = 79-01-6; r2 = 1.00000

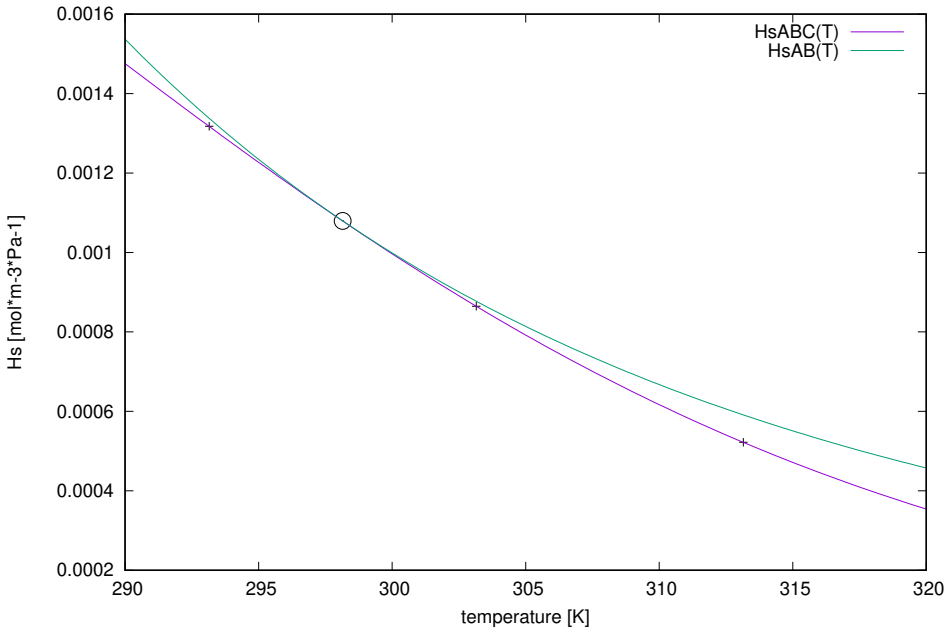



ref = 855; chem = 1,1,2,2-tetrachloroethane; casrn = 79-34-5; r2 = 1.00000

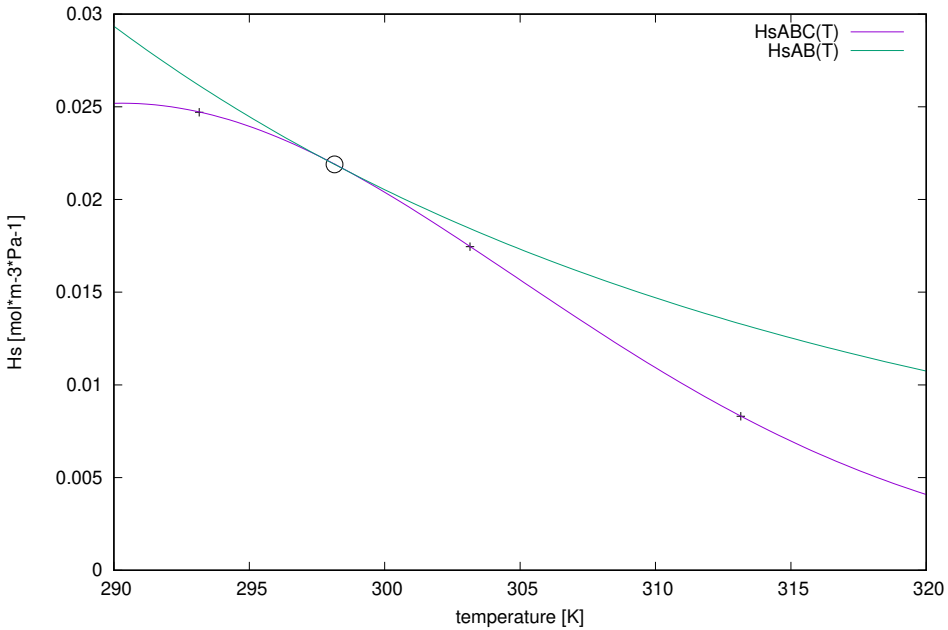

ref = 856; chem = 1,2-dichloroethane; casrn = 107-06-2; r2 = 0.99968

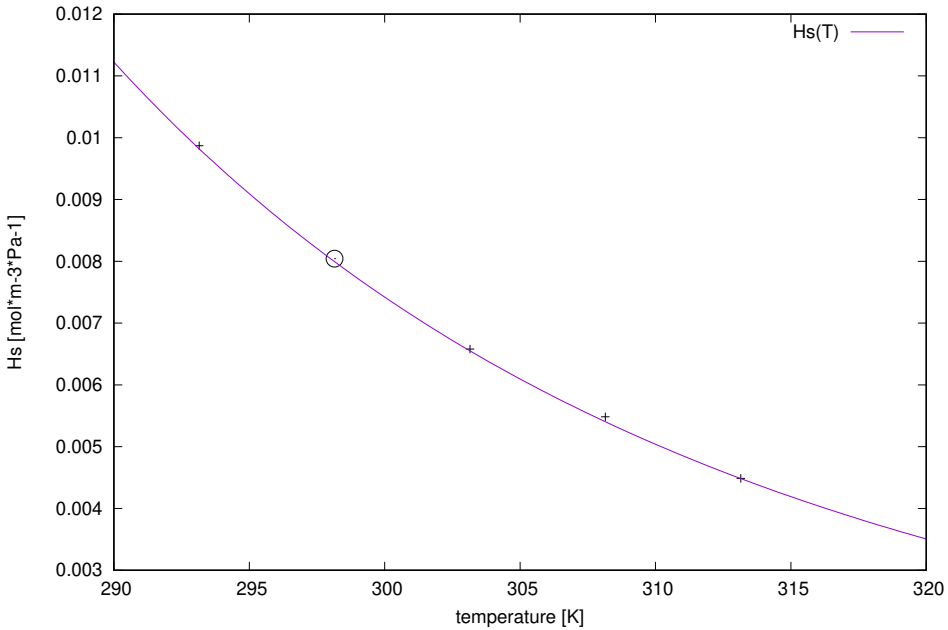

ref = 856; chem = dibromochloromethane; casrn = 124-48-1; r2 = 0.99821

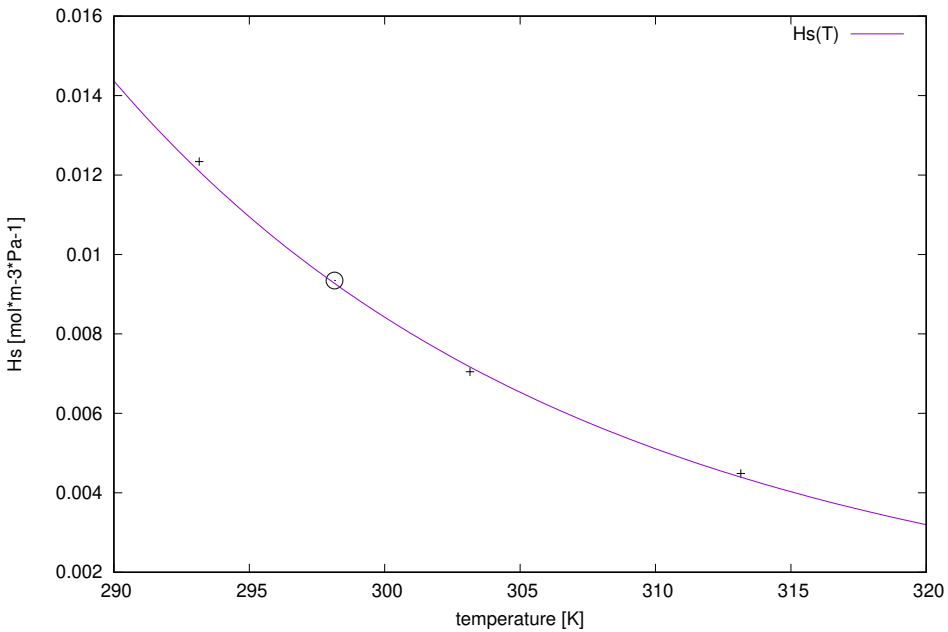

ref = 856; chem = (Z)-1,2-dichloroethene; casrn = 156-59-2; r2 = 1.00000

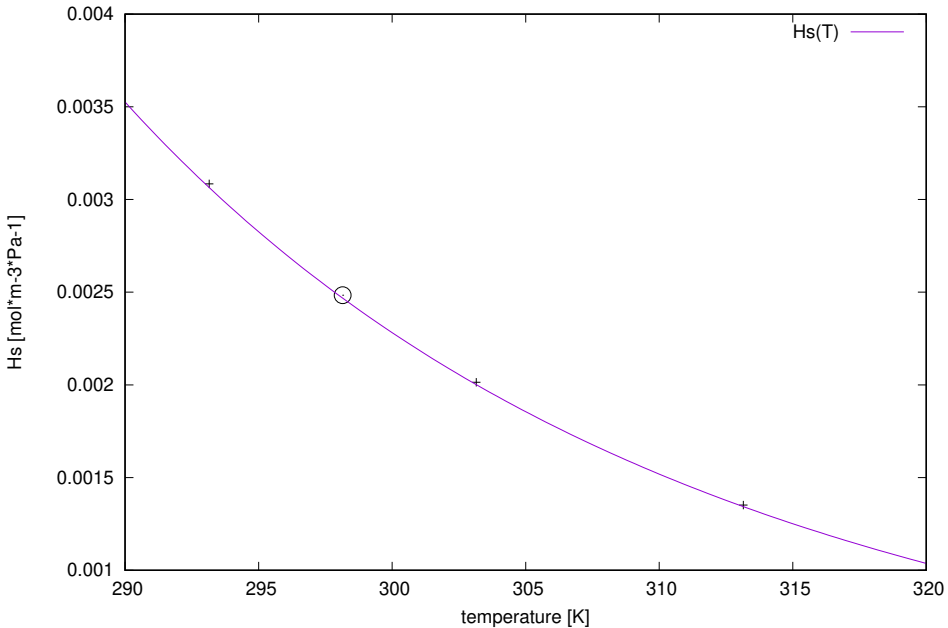

ref = 856; chem = (E)-1,2-dichloroethene; casrn = 156-60-5; r2 = 0.99951

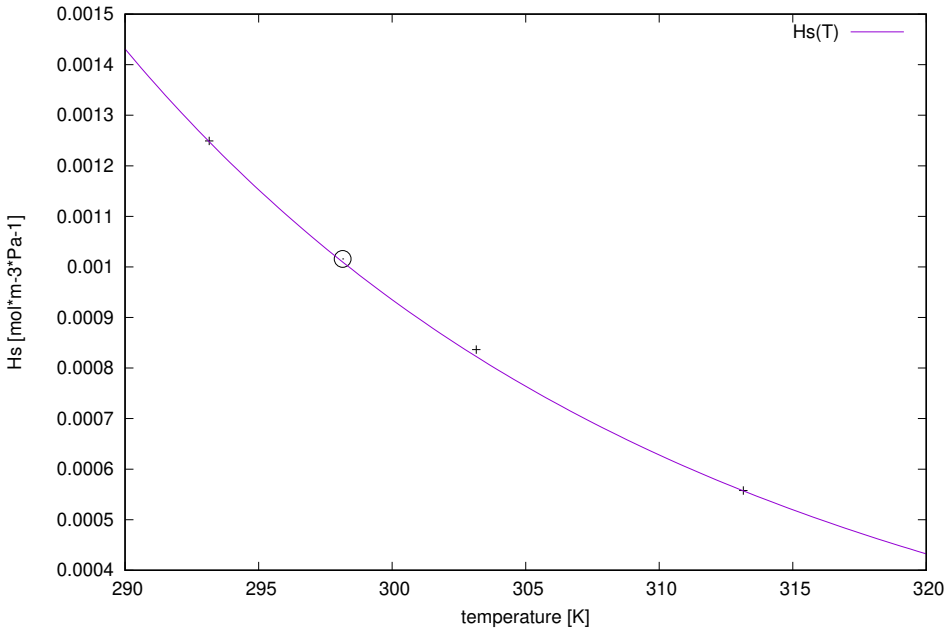

ref = 856; chem = tetrachloromethane; casrn = 56-23-5; r2 = 0.98412

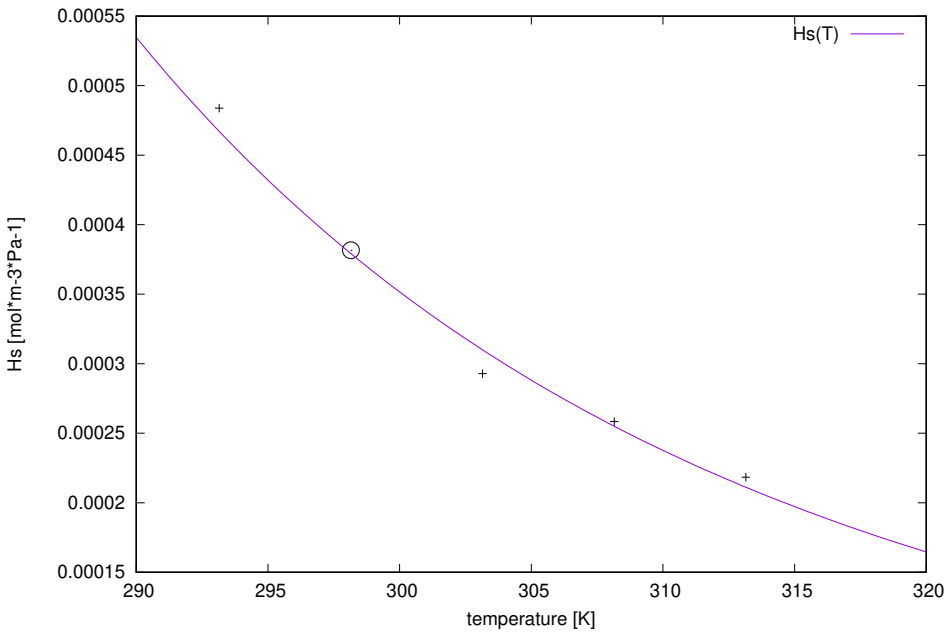

ref = 856; chem = 1,1,1,2-tetrachloroethane; casrn = 630-20-6; r2 = 0.99971

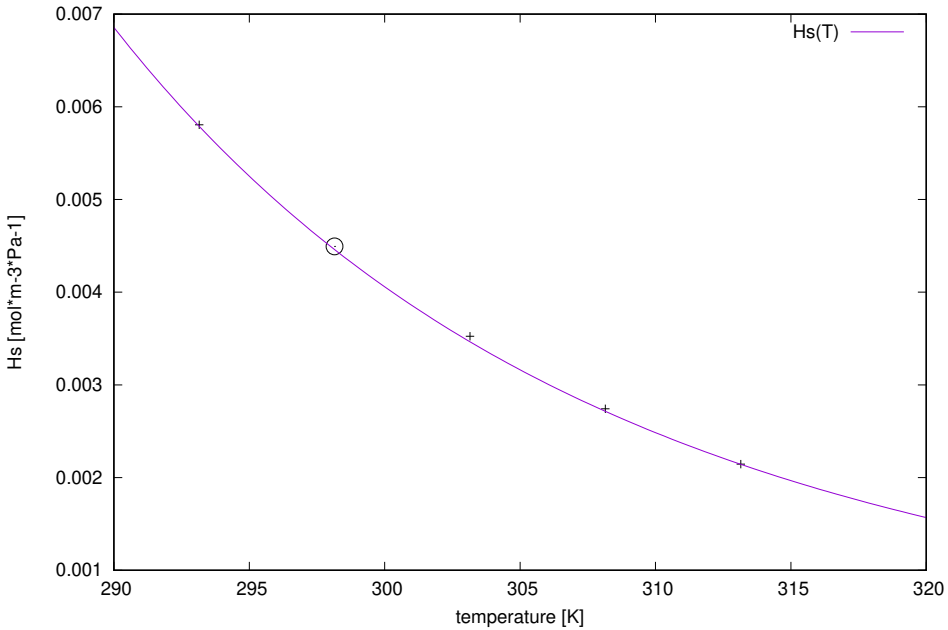

ref = 856; chem = 1,1,1-trichloroethane; casrn = 71-55-6; r2 = 0.99568

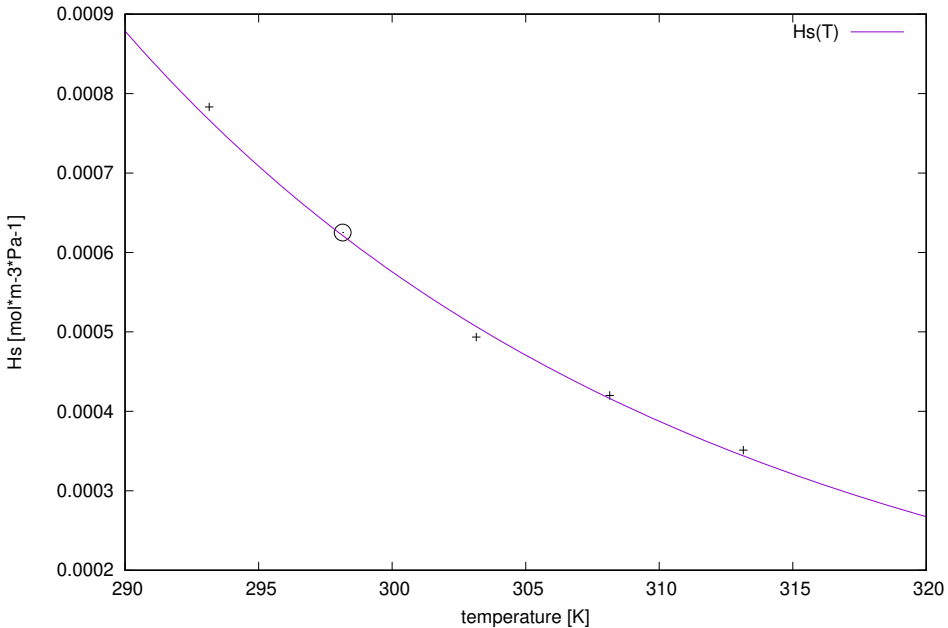



ref = 856; chem = dibromomethane; casrn = 74-95-3; r2 = 0.99938

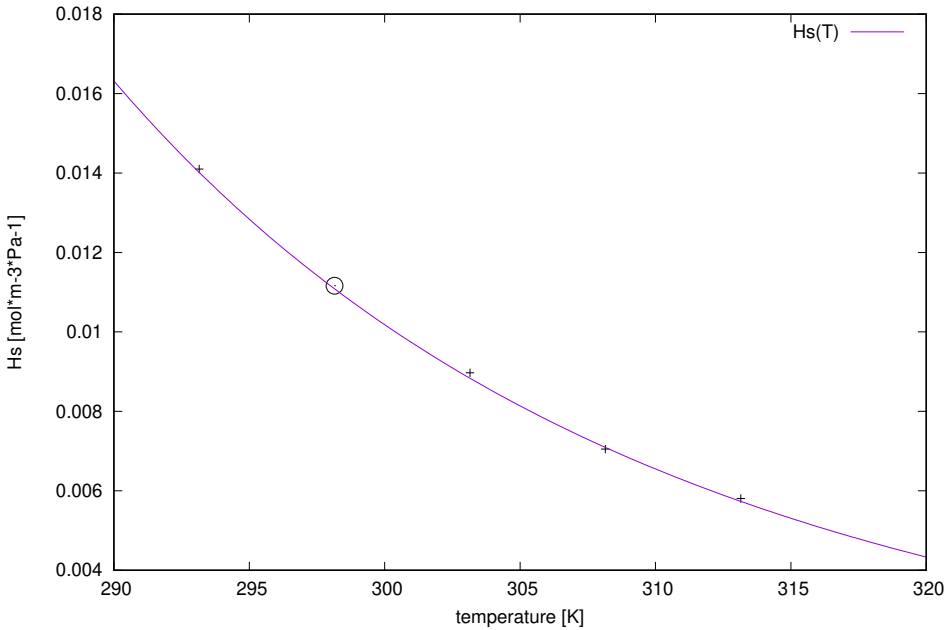

ref = 856; chem = dichloromethane; casrn = 75-09-2; r2 = 0.99959

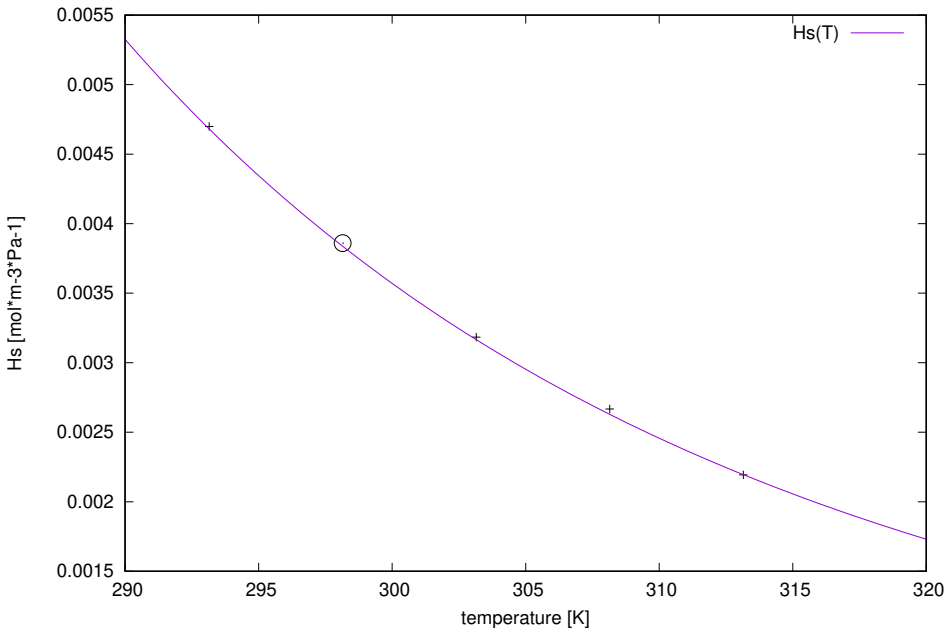

ref = 856; chem = tribromomethane; casrn = 75-25-2; r2 = 0.99993

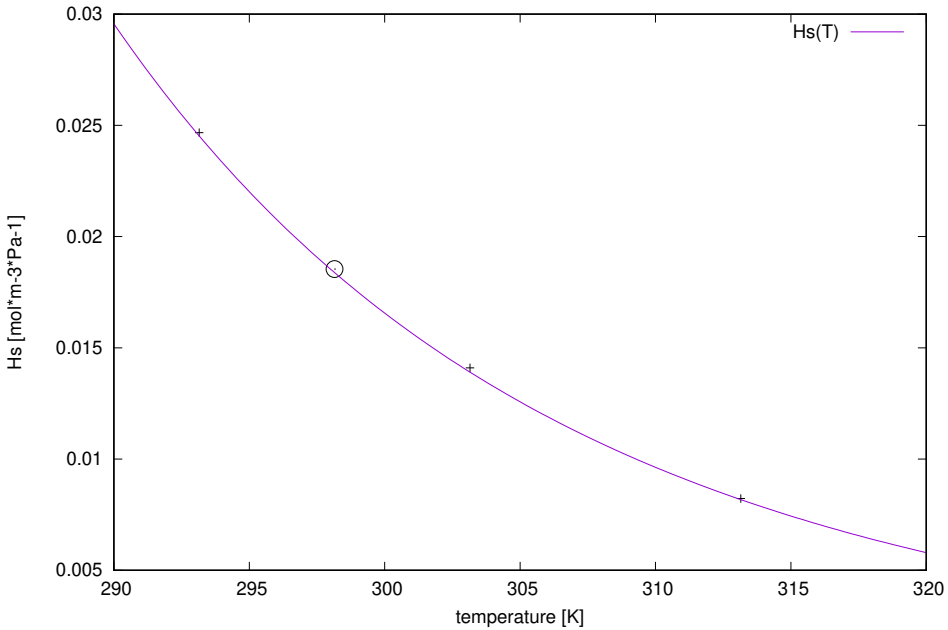

ref = 856; chem = bromodichloromethane; casrn = 75-27-4; r2 = 0.99976

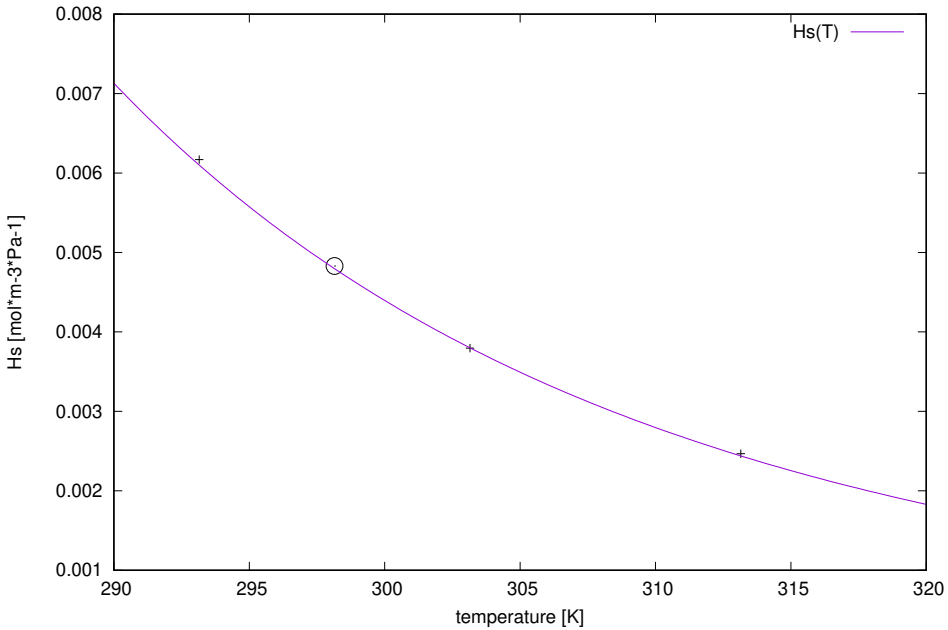

ref = 856; chem = 1,1-dichloroethane; casrn = 75-34-3; r2 = 0.99985

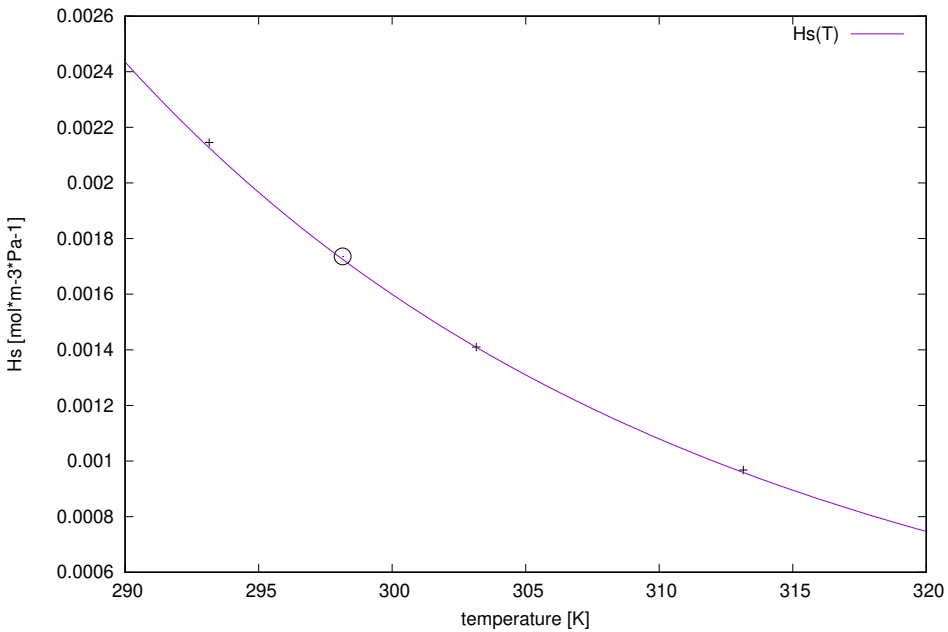

ref = 856; chem = 1,1-dichloroethene; casrn = 75-35-4; r2 = 0.99977

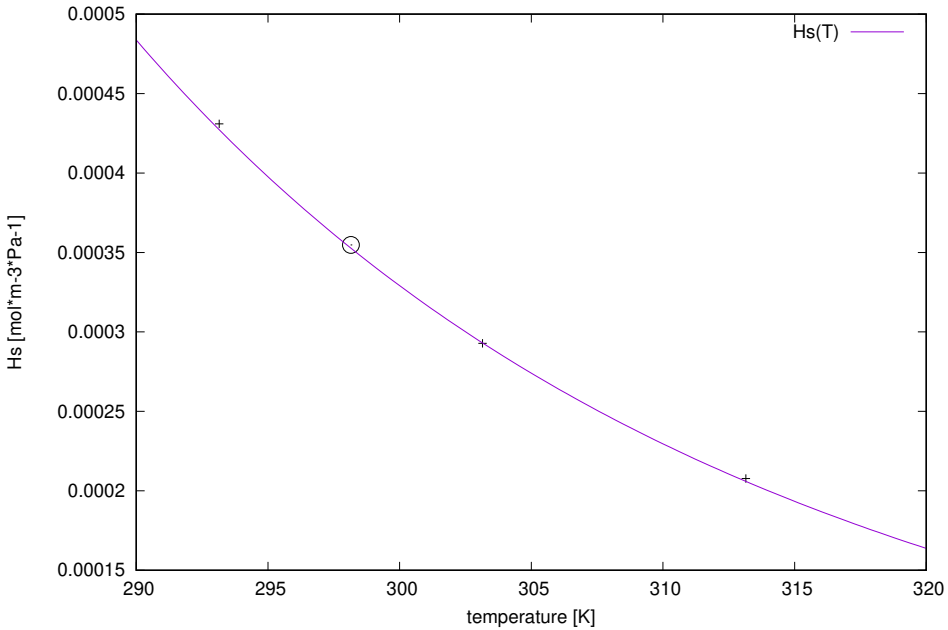

ref = 856; chem = 1,2-dichloropropane; casrn = 78-87-5; r2 = 0.99994

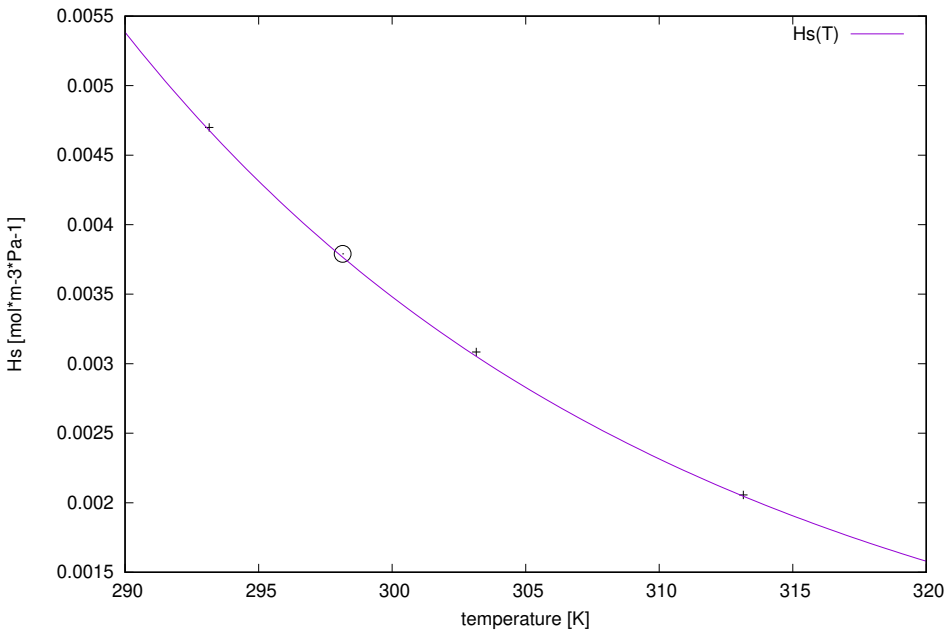

ref = 856; chem = 1,1,2-trichloroethane; casrn = 79-00-5; r2 = 0.99993

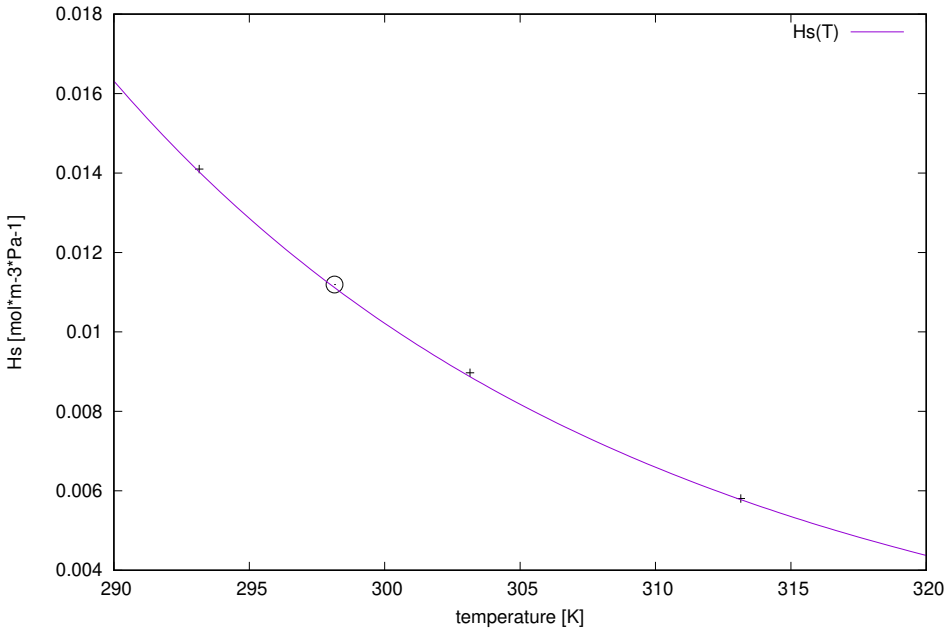



ref = 856; chem = trichloroethene; casrn = 79-01-6; r2 = 0.99933

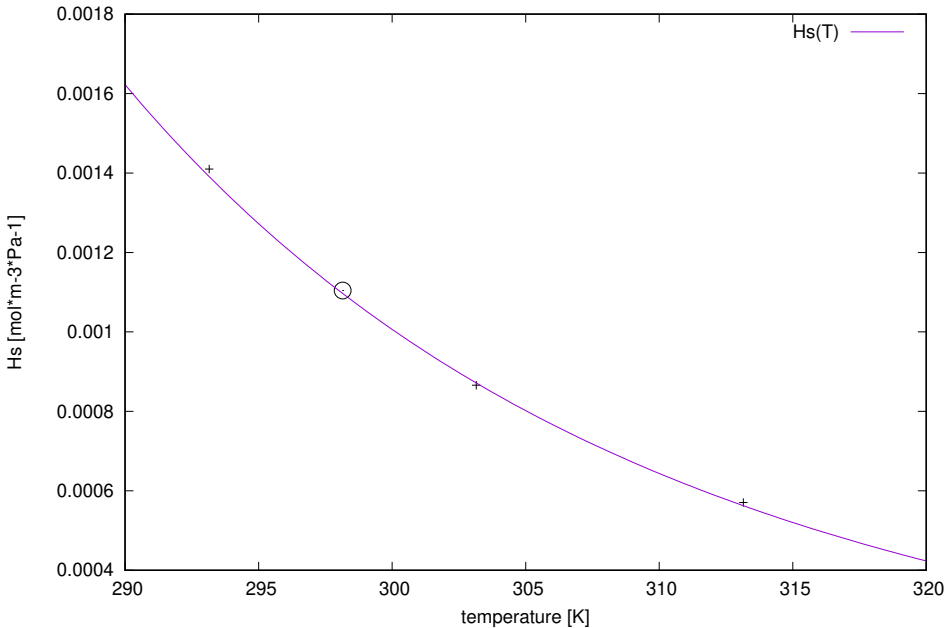

ref = 856; chem = 1,1,2,2-tetrachloroethane; casrn = 79-34-5; r2 = 0.97945

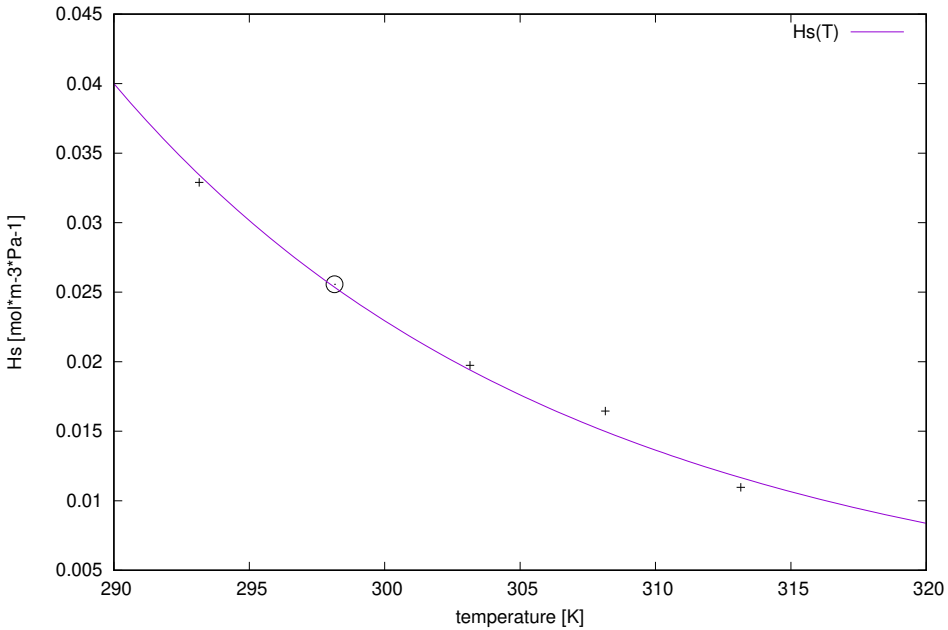

ref = 857; chem = 4-methyl-2-pentanone; casrn = 108-10-1; r2 = 0.99852

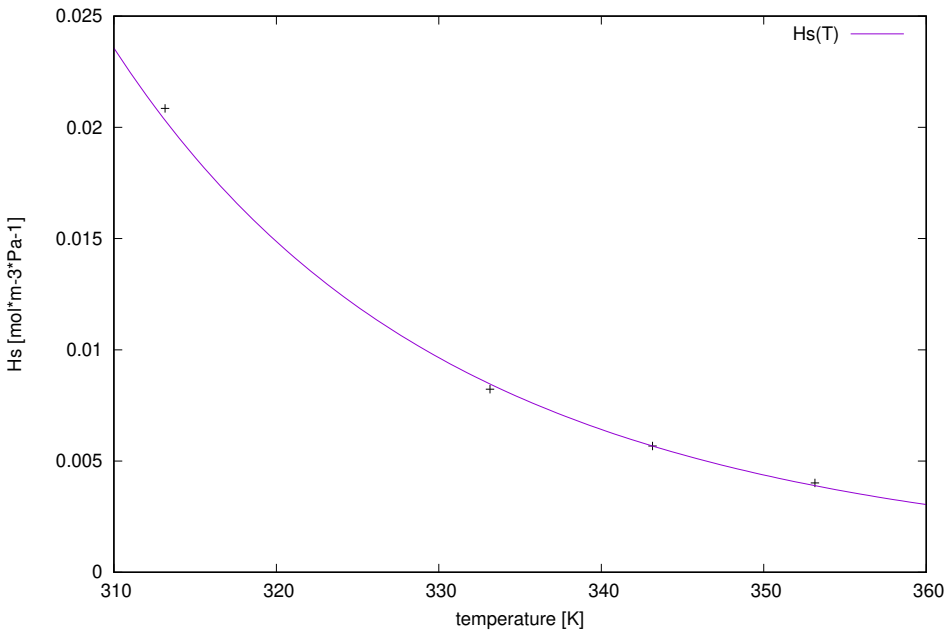

ref = 857; chem = methylbenzene; casrn = 108-88-3; r2 = 0.99754

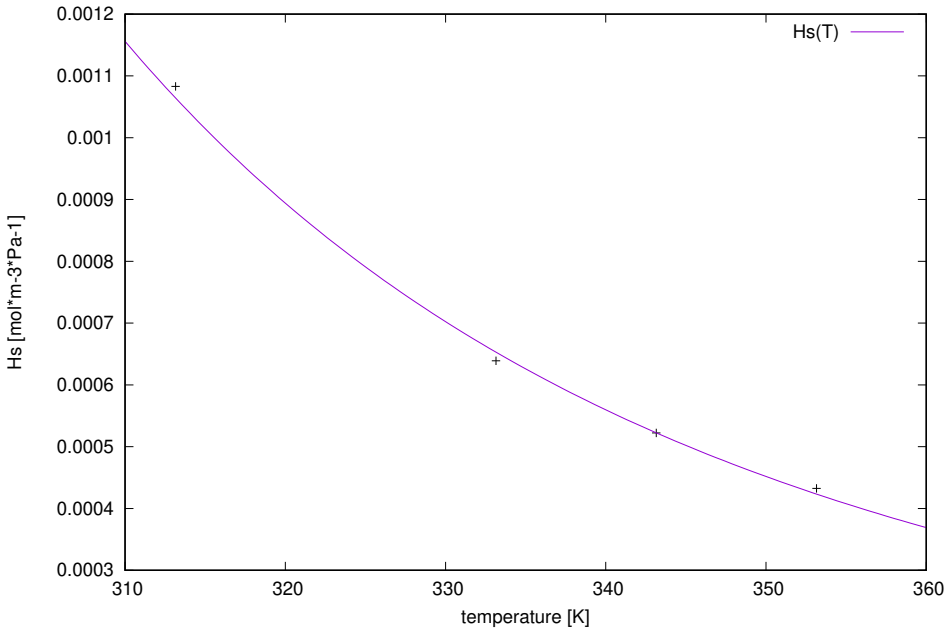

ref = 857; chem = hexane; casrn = 110-54-3; r2 = 0.94948

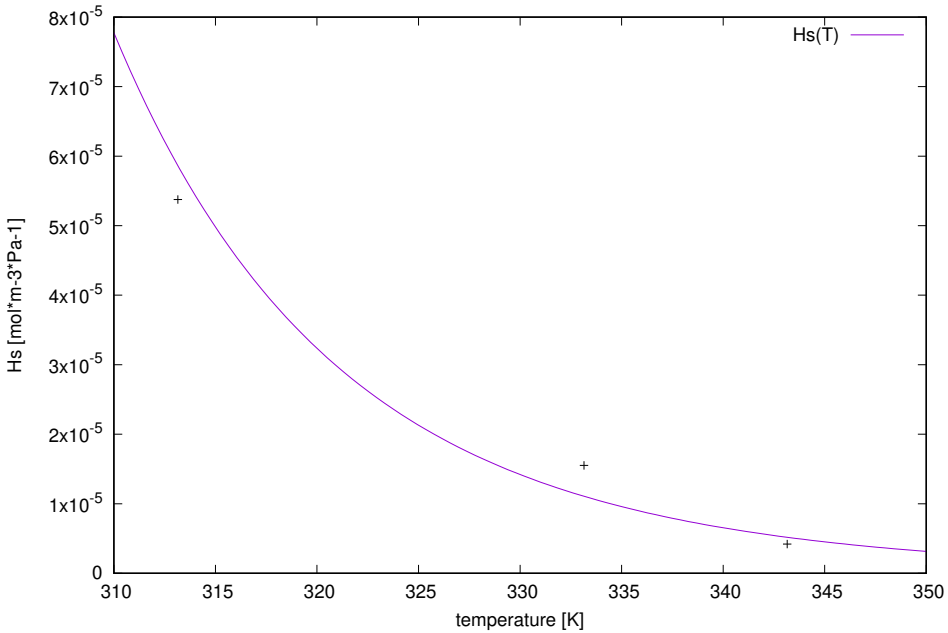

ref = 857; chem = cyclohexane; casrn = 110-82-7; r2 = 0.93364

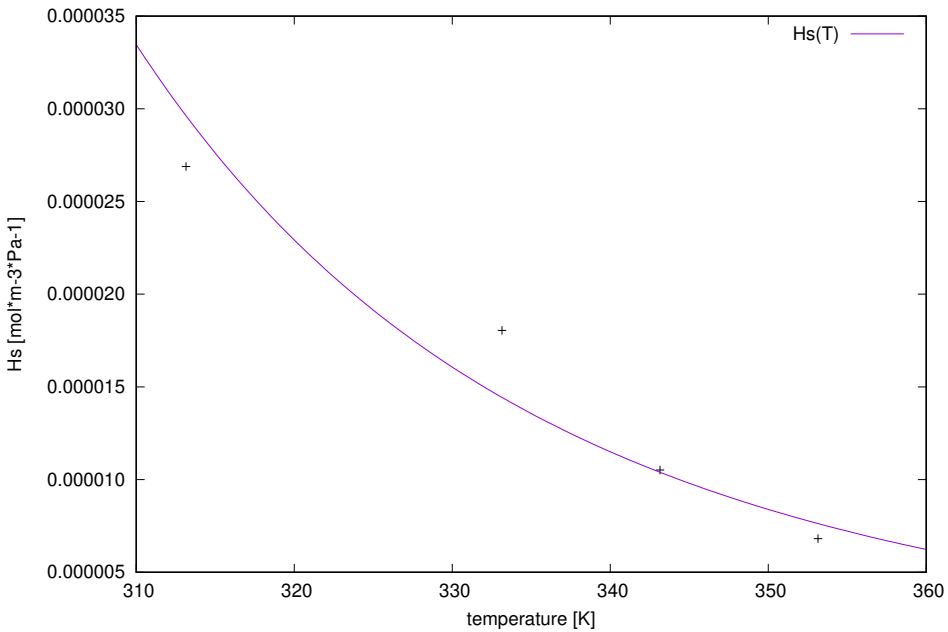

ref = 857; chem = butyl ethanoate; casrn = 123-86-4; r2 = 0.99605

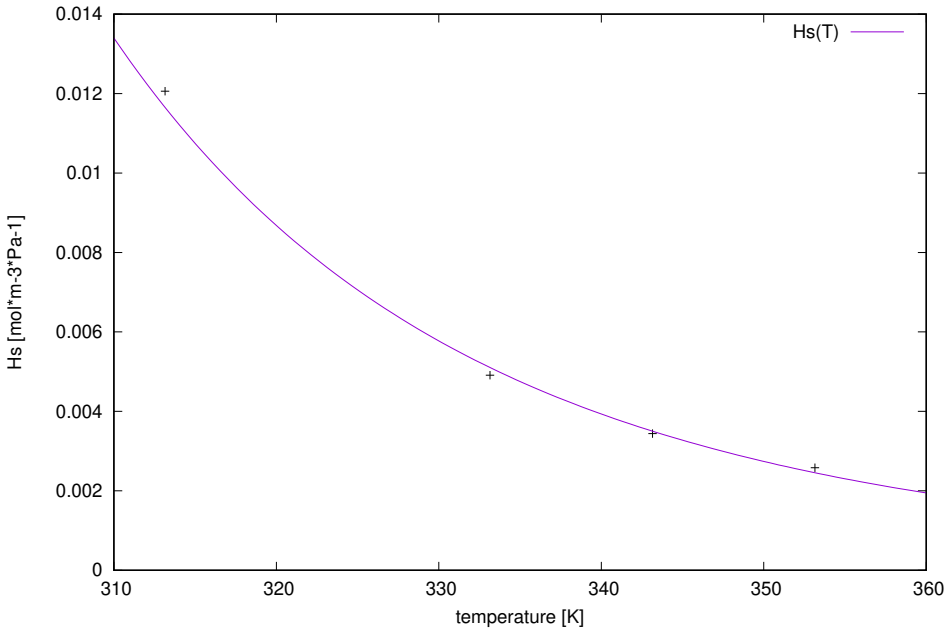

ref = 857; chem = 1,4-dioxane; casrn = 123-91-1; r2 = 0.99962

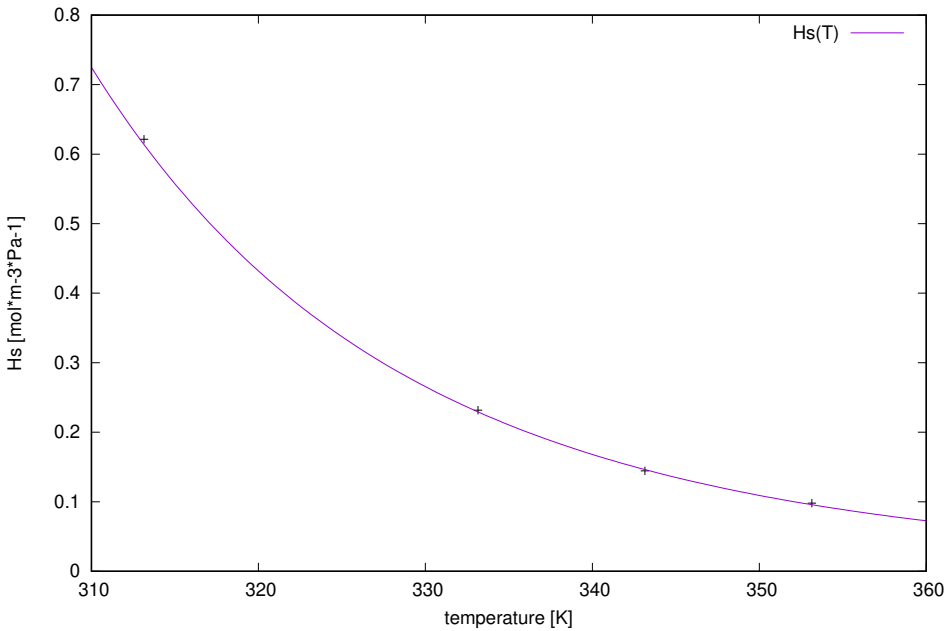



ref = 857; chem = tetrachloroethene; casrn = 127-18-4; r2 = 0.83043

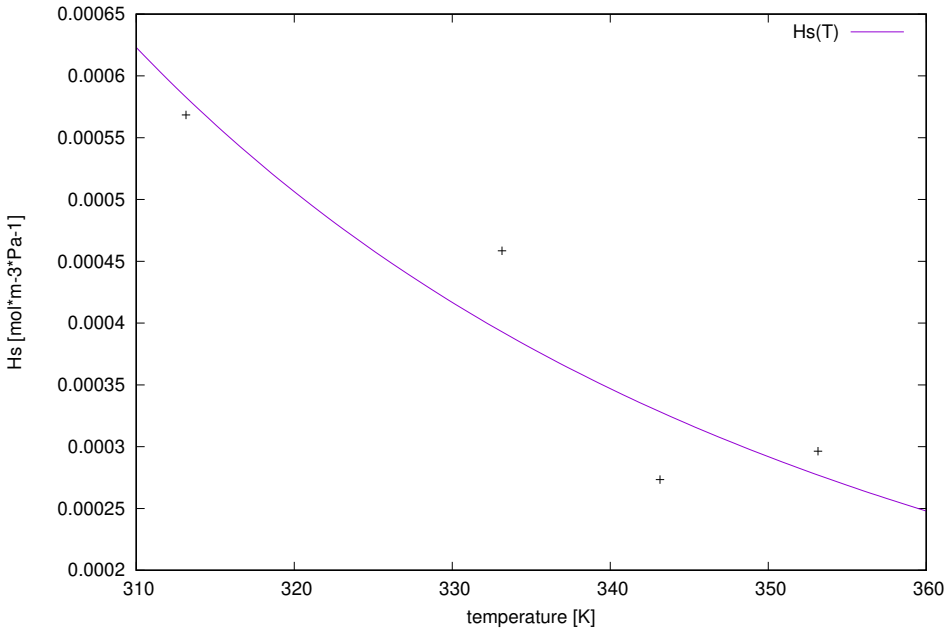

ref = 857; chem = ethyl ethanoate; casrn = 141-78-6; r2 = 0.99504

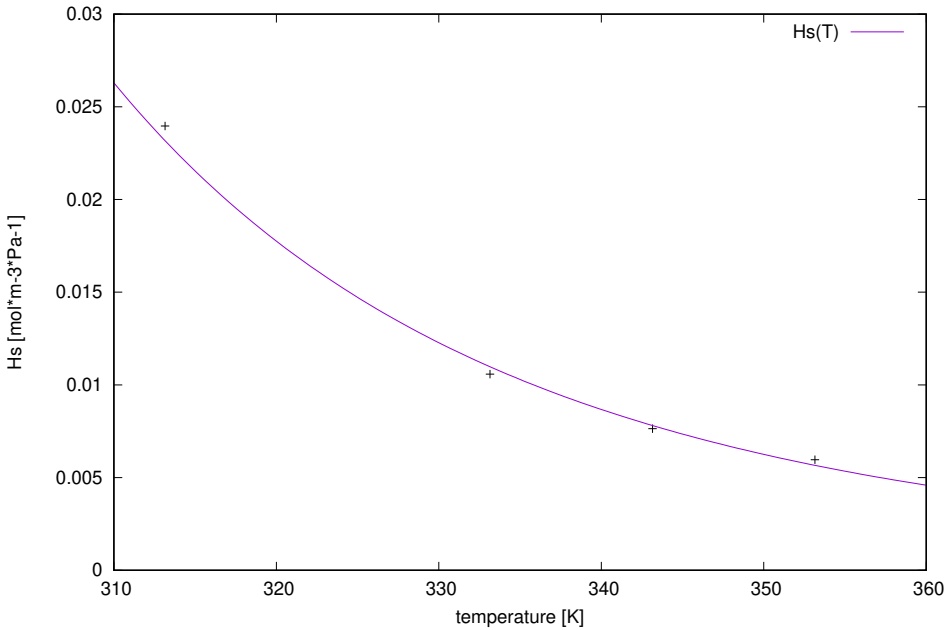

ref = 857; chem = 2-propanol; casrn = 67-63-0; r2 = 0.99982

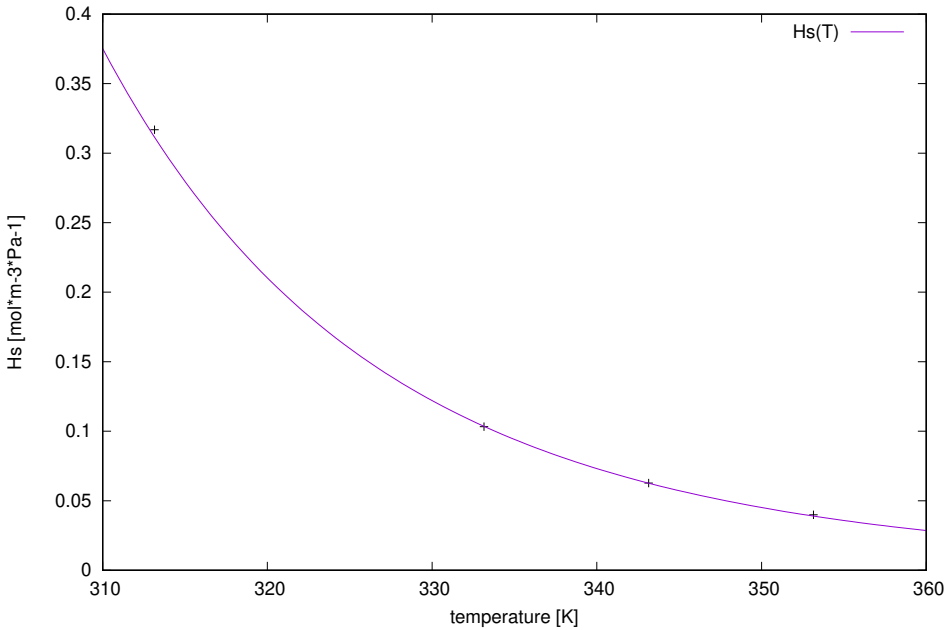

ref = 857; chem = 1-butanol; casrn = 71-36-3; r2 = 0.99922

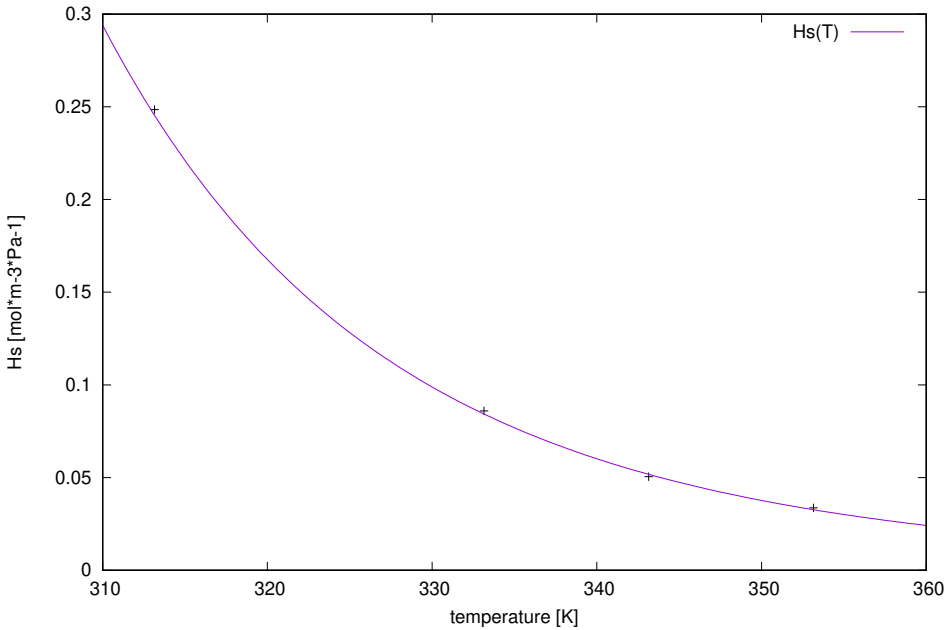

ref = 857; chem = 1,1,1-trichloroethane; casrn = 71-55-6; r2 = 0.97217

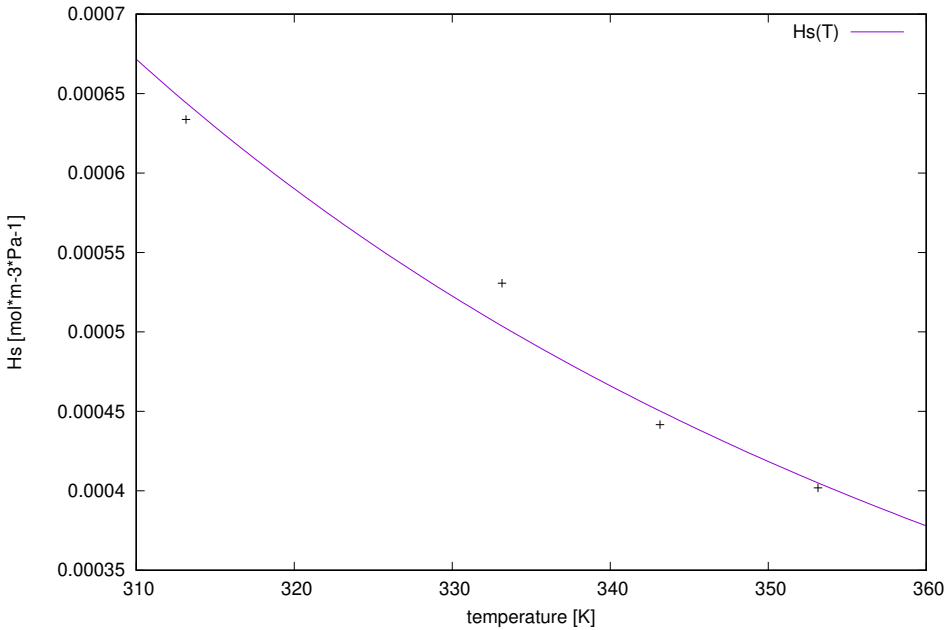

ref = 857; chem = 1,2-dimethylbenzene; casrn = 95-47-6; r2 = 0.96099

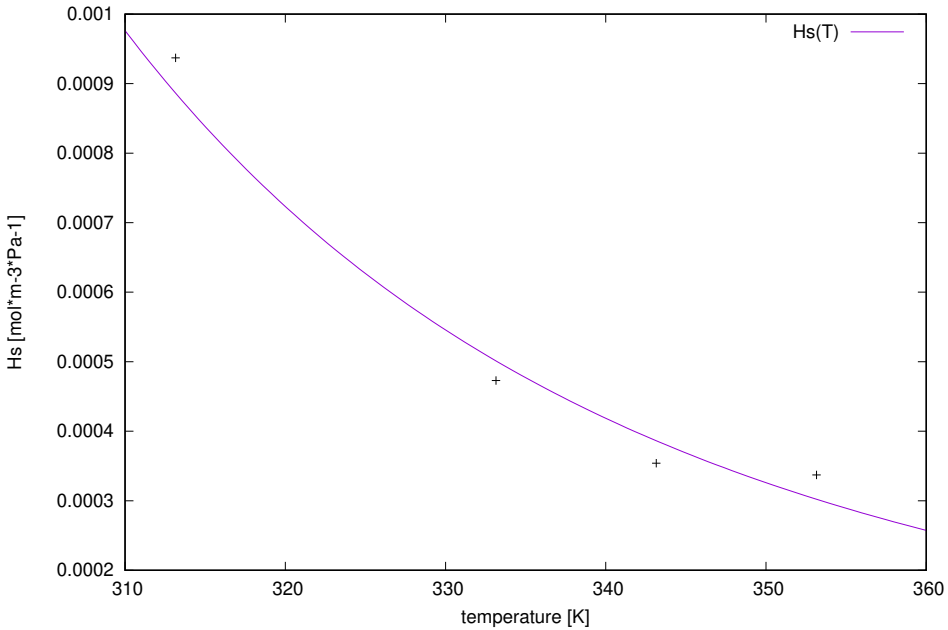

ref = 858; chem = methylbenzene; casrn = 108-88-3; r2 = 0.98965

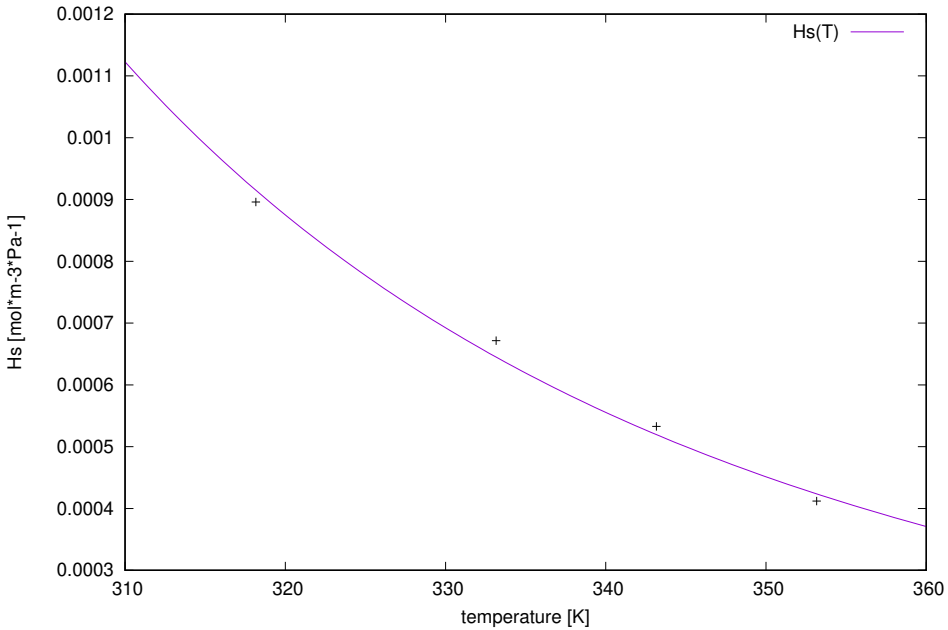

ref = 858; chem = chlorobenzene; casrn = 108-90-7; r2 = 0.97988

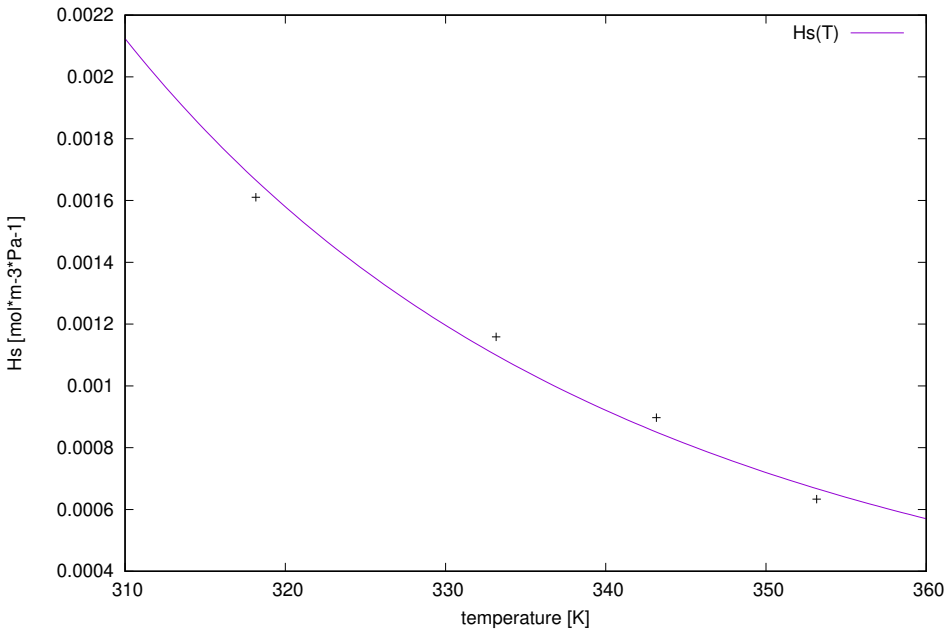



ref = 858; chem = benzene; casrn = 71-43-2; r2 = 0.96463

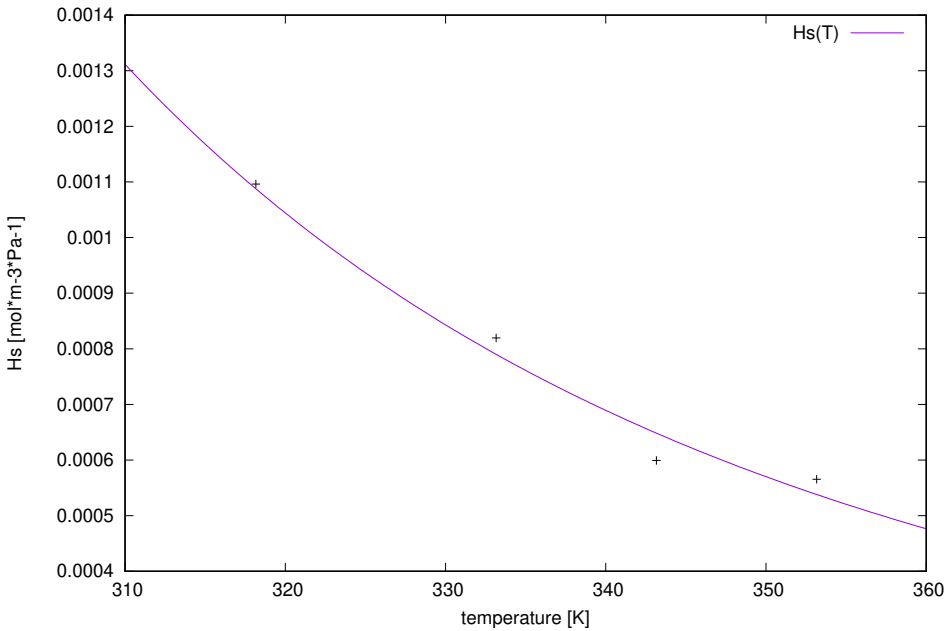

ref = 858; chem = 2-butanone; casrn = 78-93-3; r2 = 0.99213

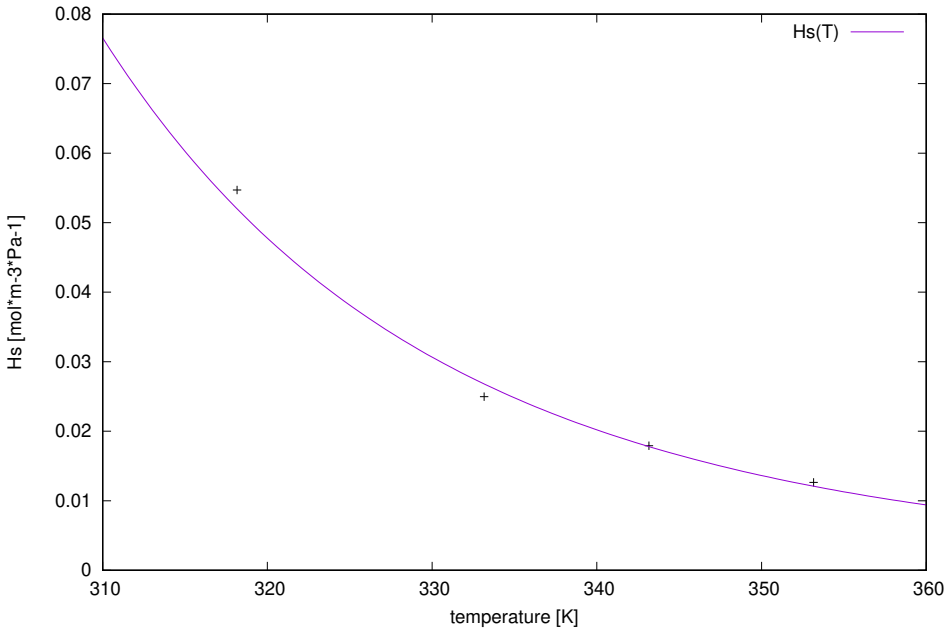

ref = 862; chem = carbon oxide sulfide; casrn = 463-58-1; r2 = 0.99792

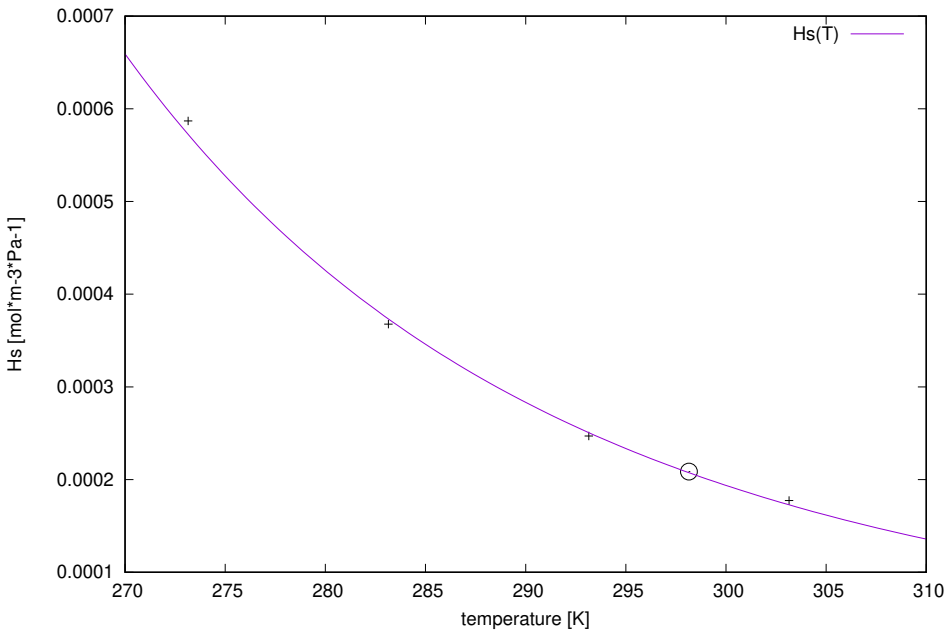

ref = 862; chem = trichloromethane; casrn = 67-66-3; r2 = 0.98840

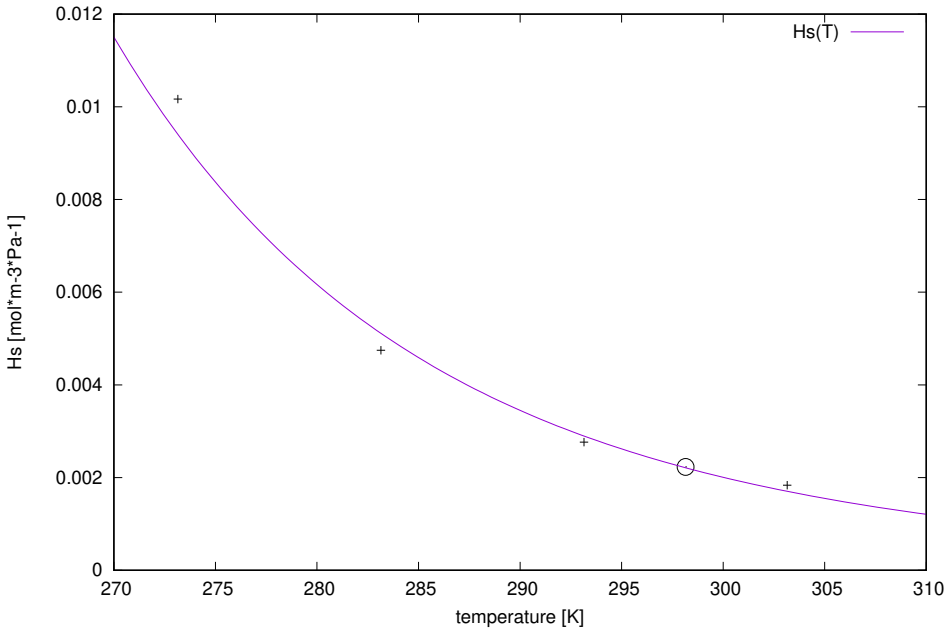

ref = 862; chem = ethene; casrn = 74-85-1; r2 = 0.99637

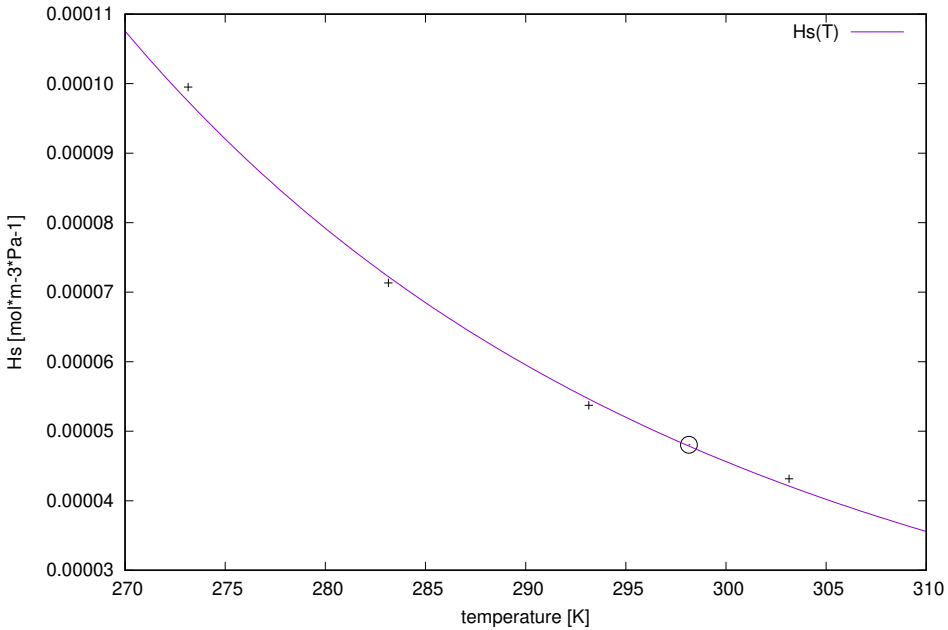

ref = 862; chem = ethyne; casrn = 74-86-2; r2 = 0.99858

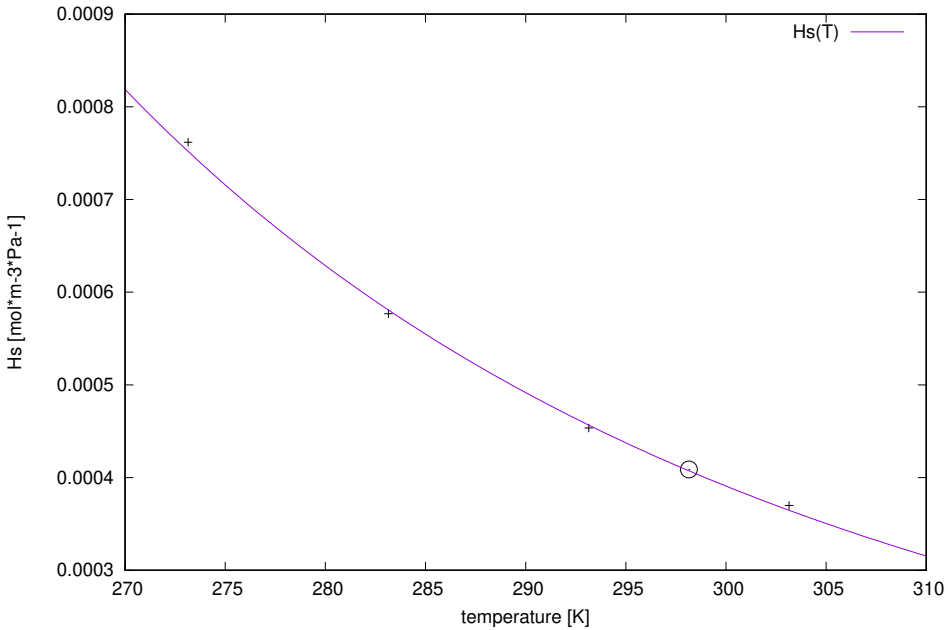

ref = 862; chem = argon; casrn = 7440-37-1; r2 = 0.98986

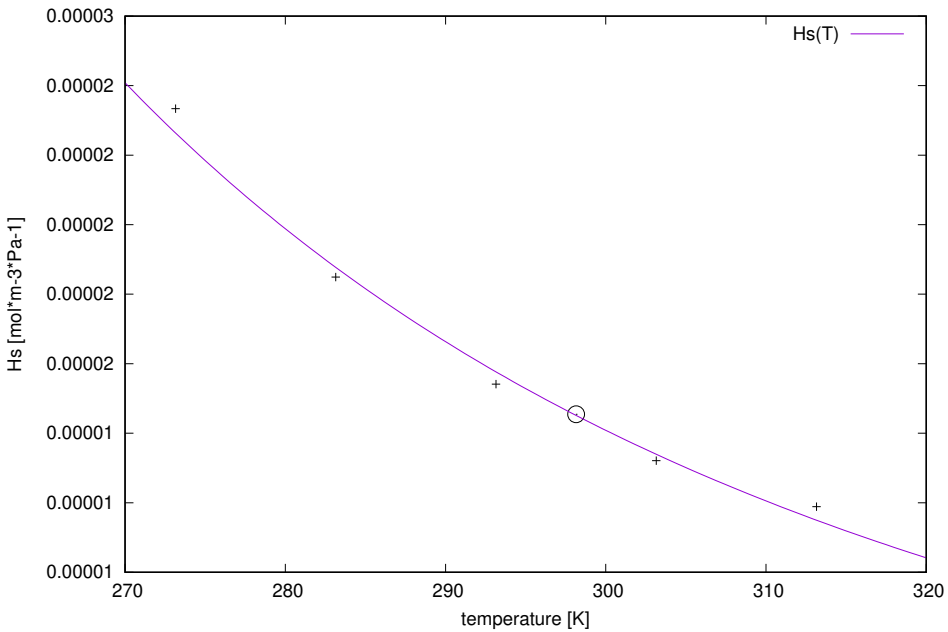

ref = 862; chem = carbon disulfide; casrn = 75-15-0; r2 = 0.99791

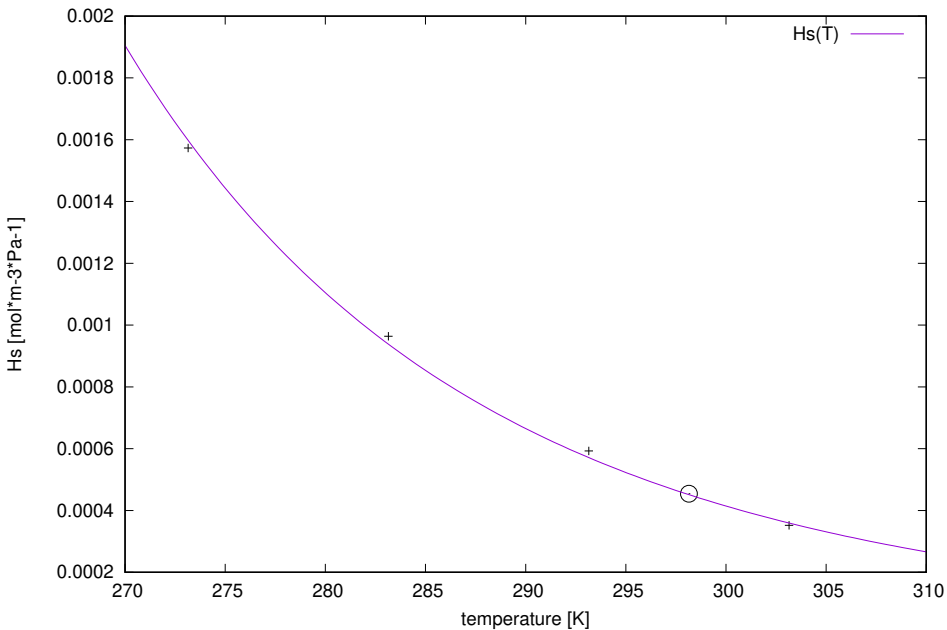



ref = 862; chem = bromine (molecular); casrn = 7726-95-6; r2 = 0.99800

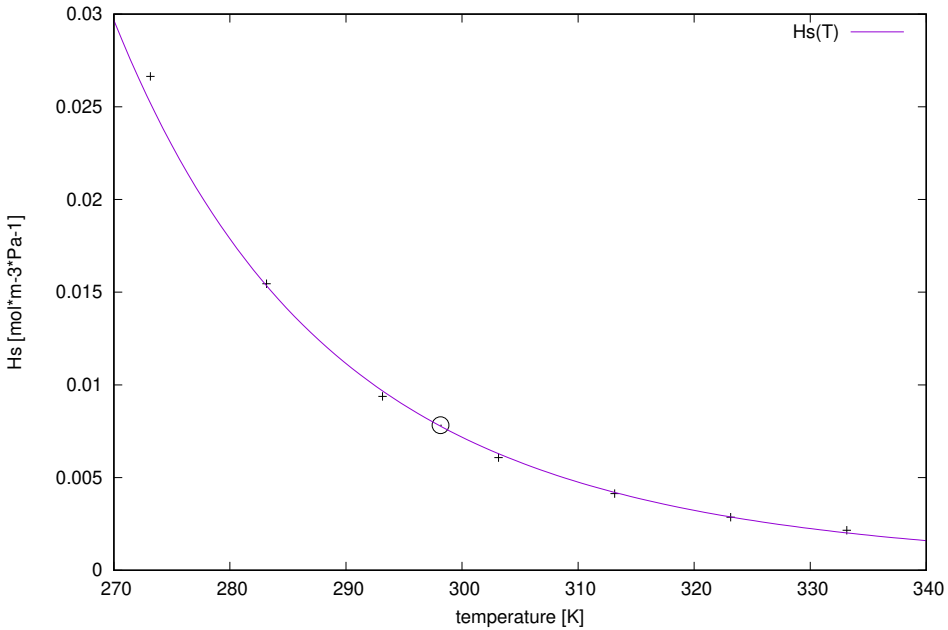

ref = 862; chem = hydrogen sulfide; casrn = 7783-06-4; r2 = 0.99554

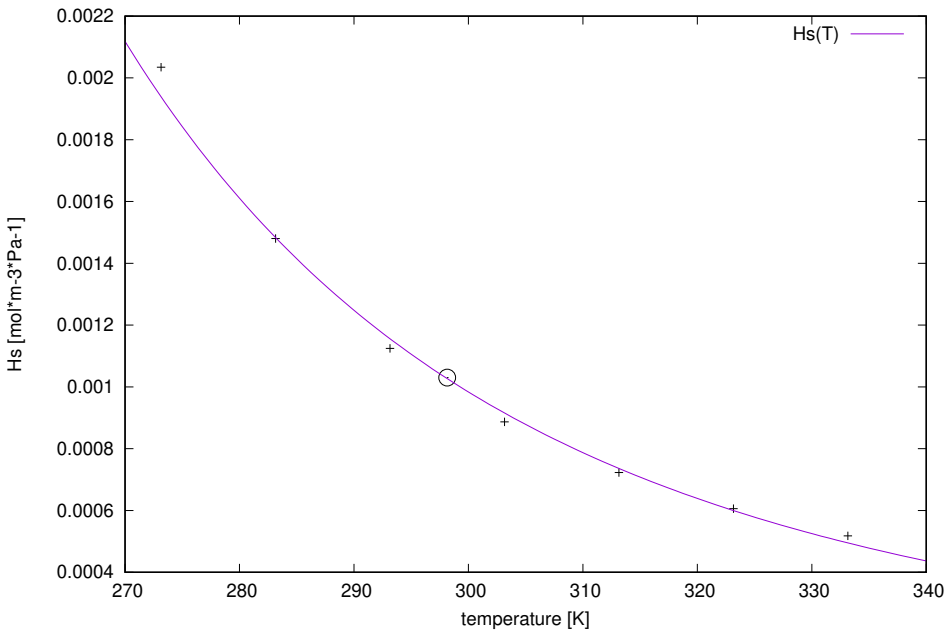

ref = 863; chem = 1-bromopropane; casrn = 106-94-5; r2 = 0.99727

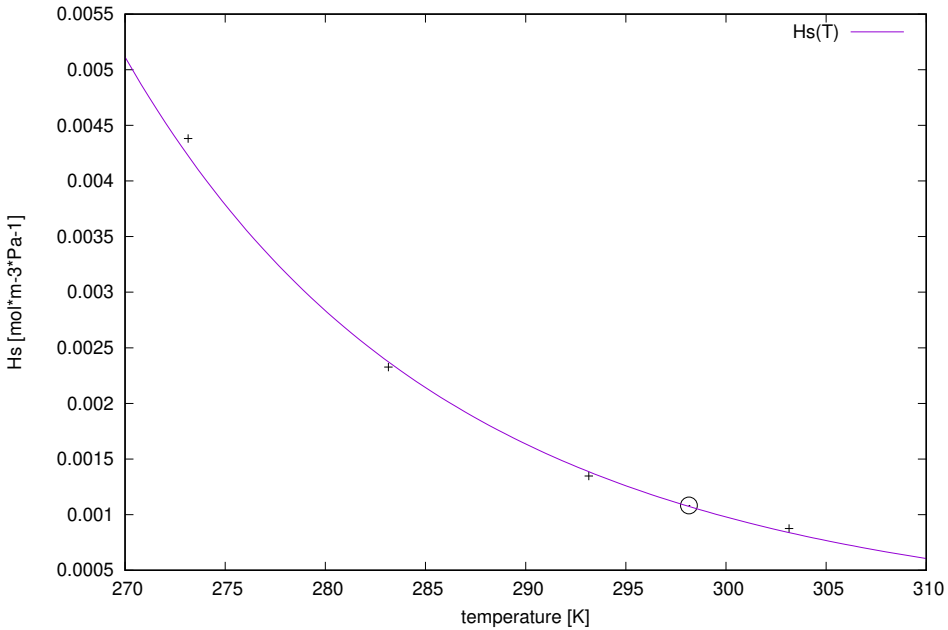

ref = 863; chem = 1,2-dichloroethane; casrn = 107-06-2; r2 = 0.99820

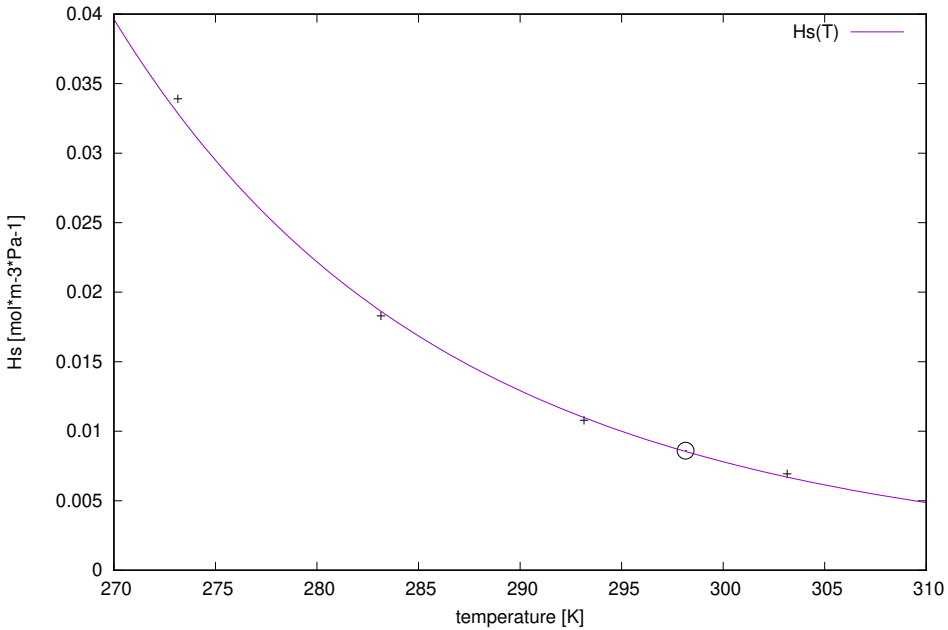

ref = 863; chem = 1-iodopropane; casrn = 107-08-4; r2 = 0.99951

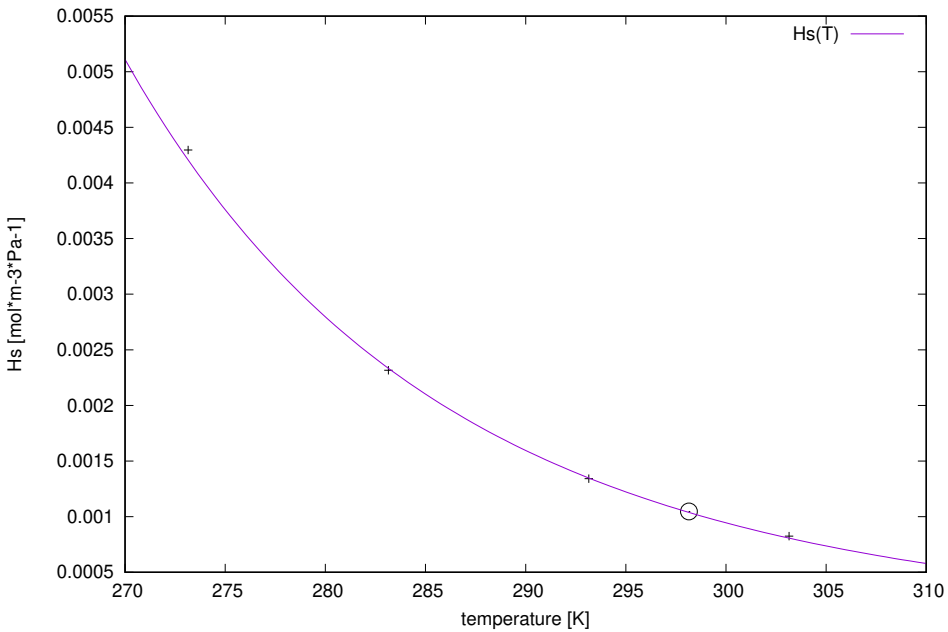

ref = 863; chem = 1-chloropropane; casrn = 540-54-5; r2 = 0.99206

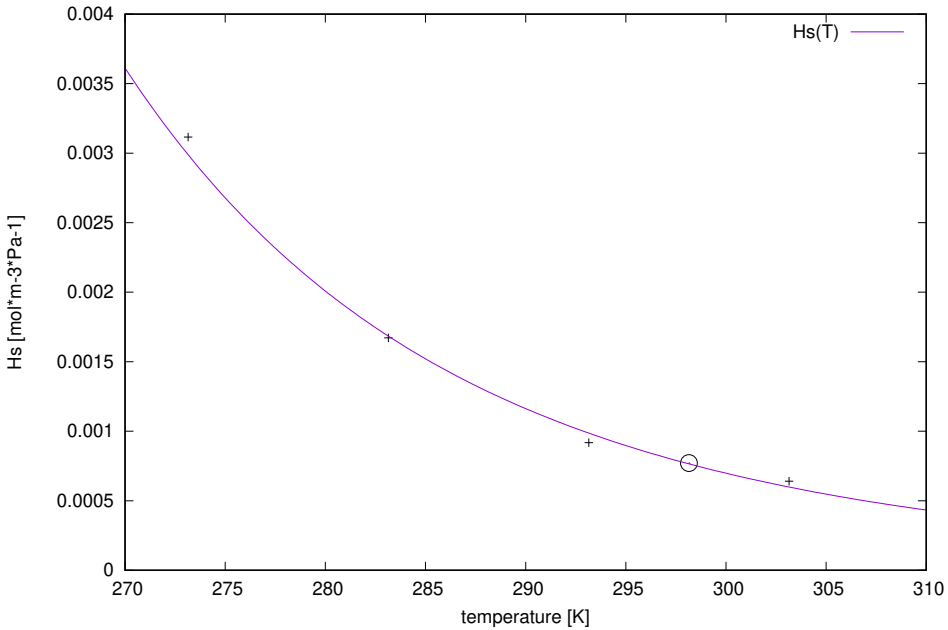

ref = 863; chem = tetrachloromethane; casrn = 56-23-5; r2 = 0.98961

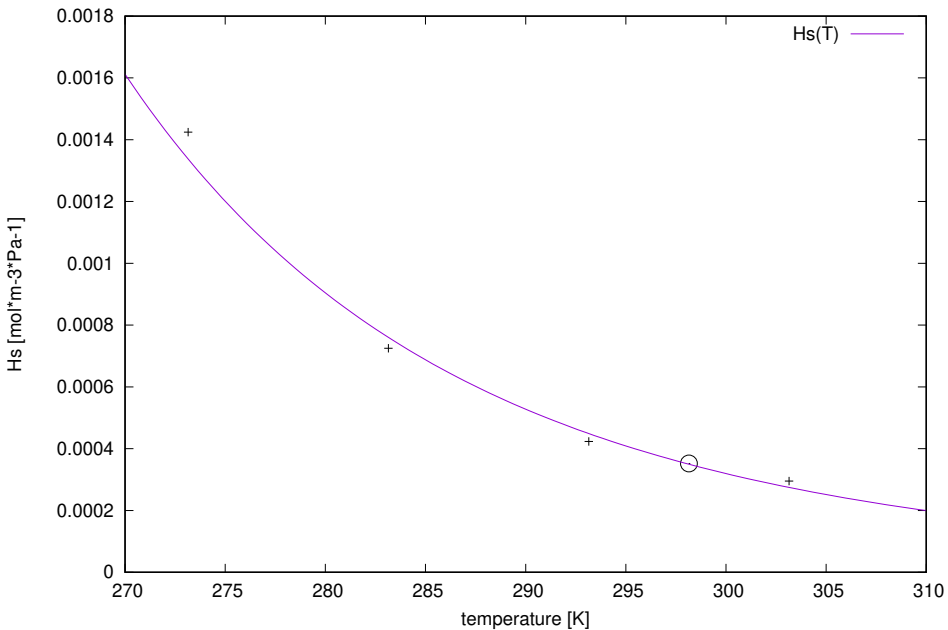

ref = 863; chem = trichloromethane; casrn = 67-66-3; r2 = 0.99842

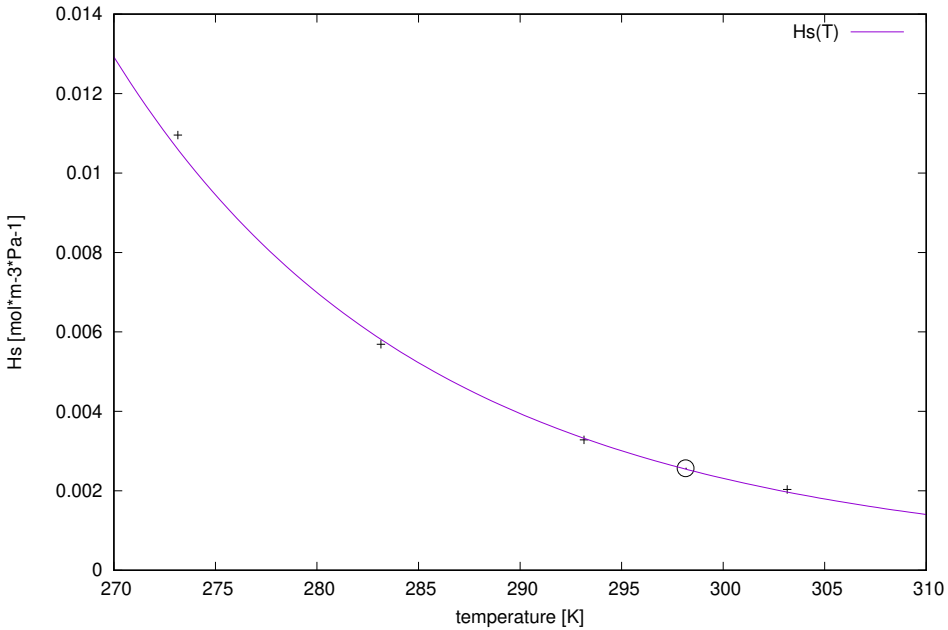



ref = 863; chem = iodomethane; casrn = 74-88-4; r2 = 0.99793

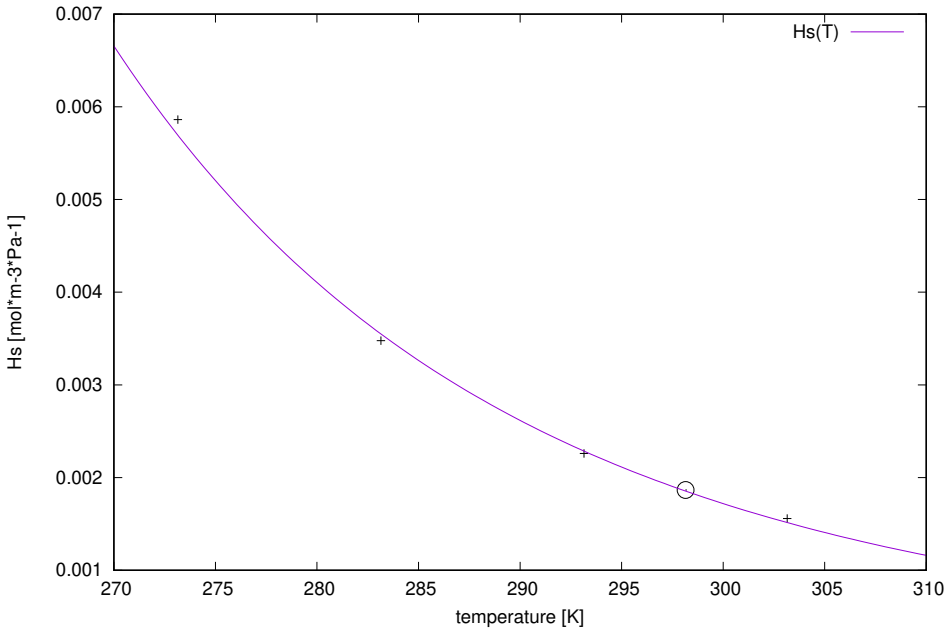

ref = 863; chem = dibromomethane; casrn = 74-95-3; r2 = 0.99941

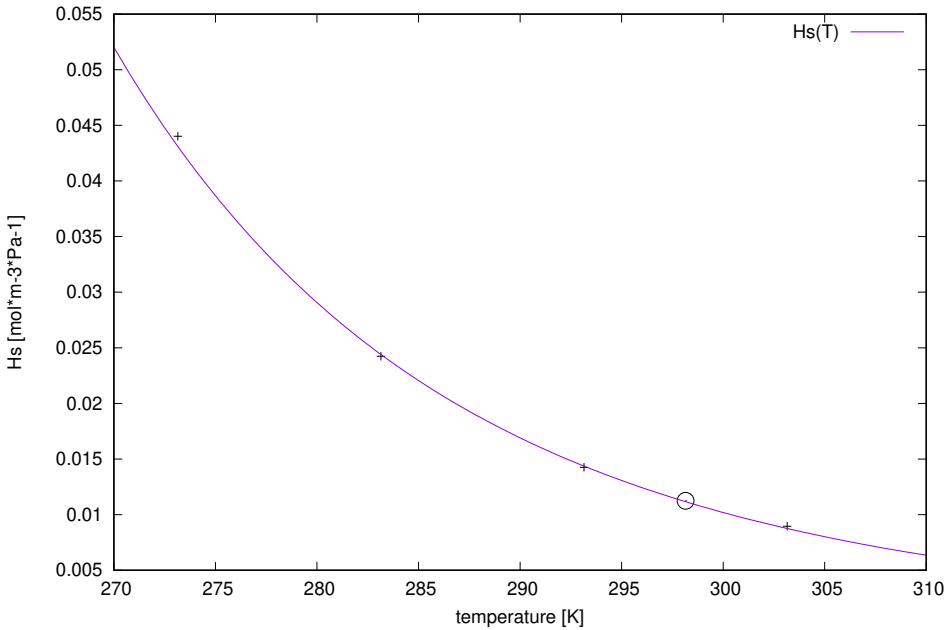

ref = 863; chem = bromoethane; casrn = 74-96-4; r2 = 0.99888

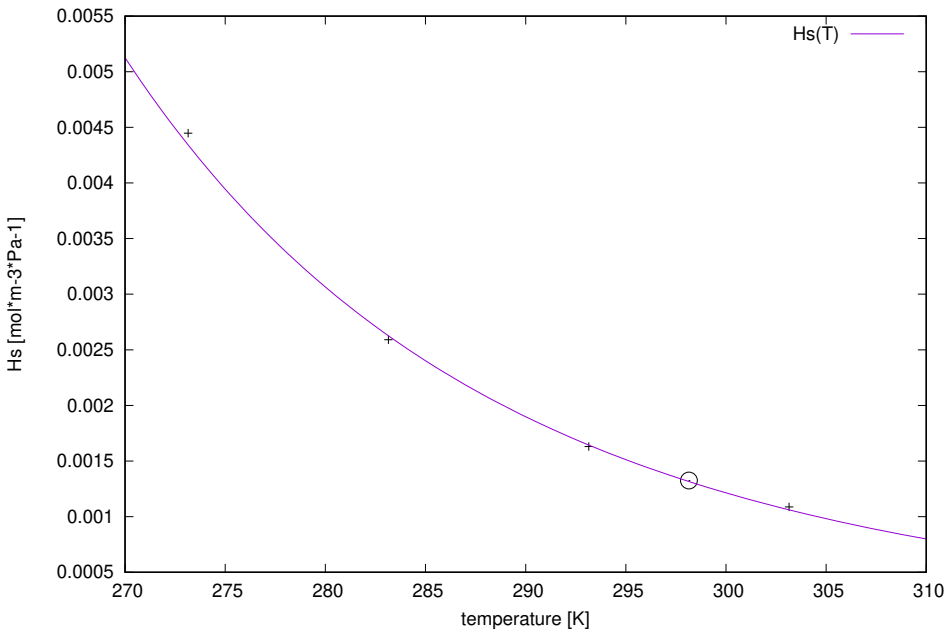

ref = 863; chem = iodoethane; casrn = 75-03-6; r2 = 0.99824

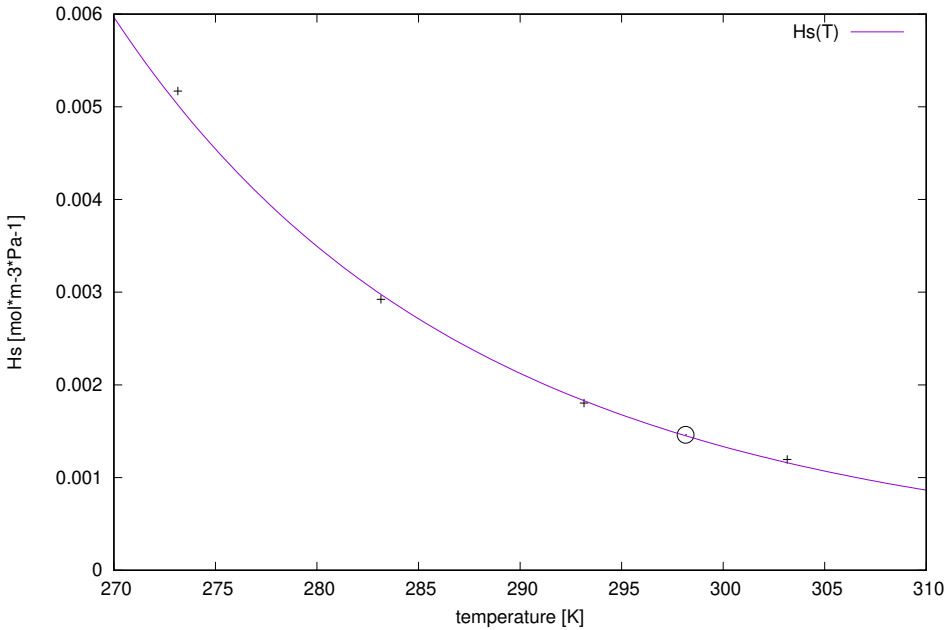

ref = 863; chem = dichloromethane; casrn = 75-09-2; r2 = 0.99848

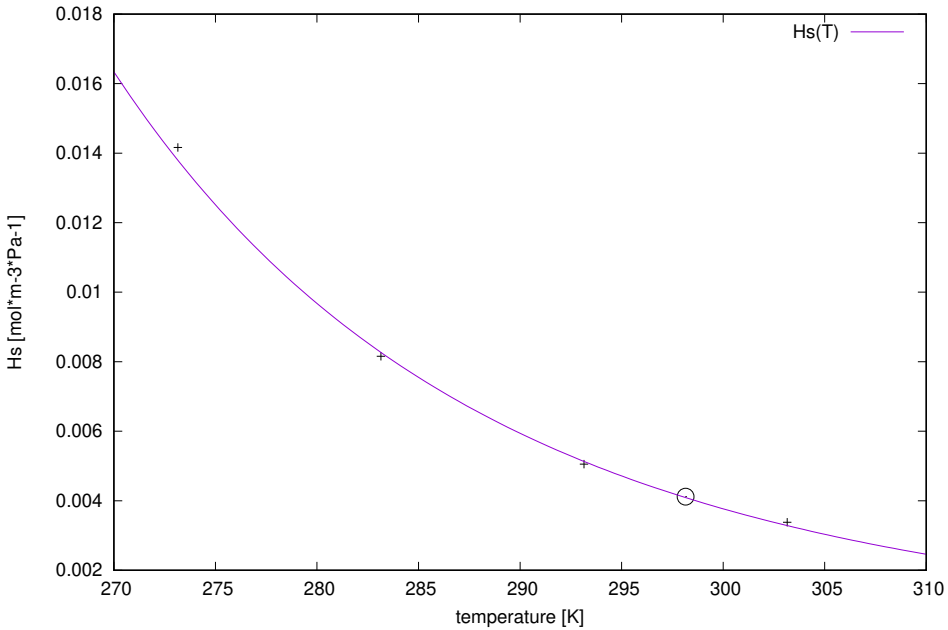

ref = 863; chem = carbon disulfide; casrn = 75-15-0; r2 = 0.99715

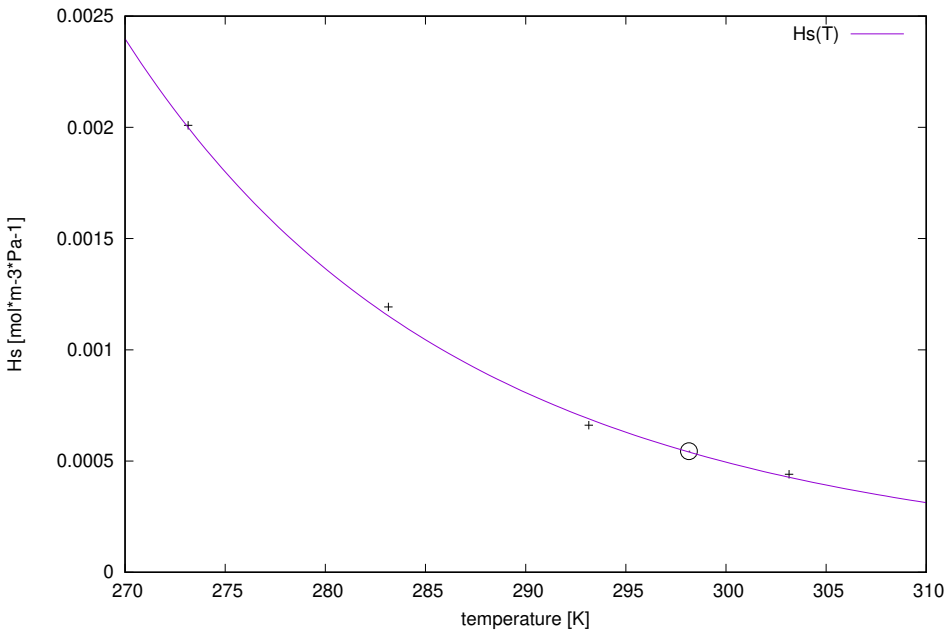

ref = 863; chem = 2-bromopropane; casrn = 75-26-3; r2 = 0.99621

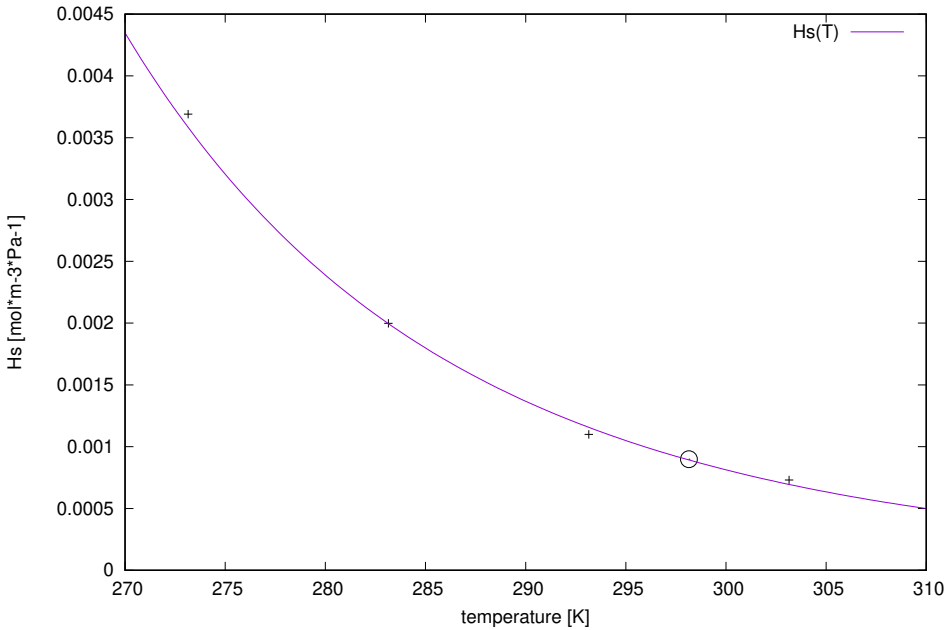

ref = 863; chem = 2-chloropropane; casrn = 75-29-6; r2 = 0.99252

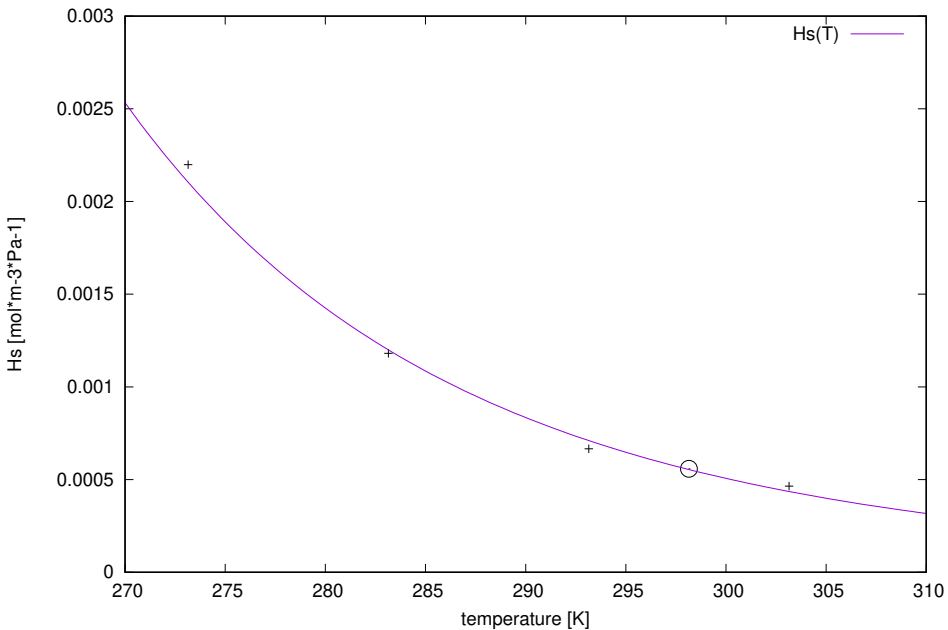



ref = 863; chem = 2-iodopropane; casrn = 75-30-9; r2 = 0.99859

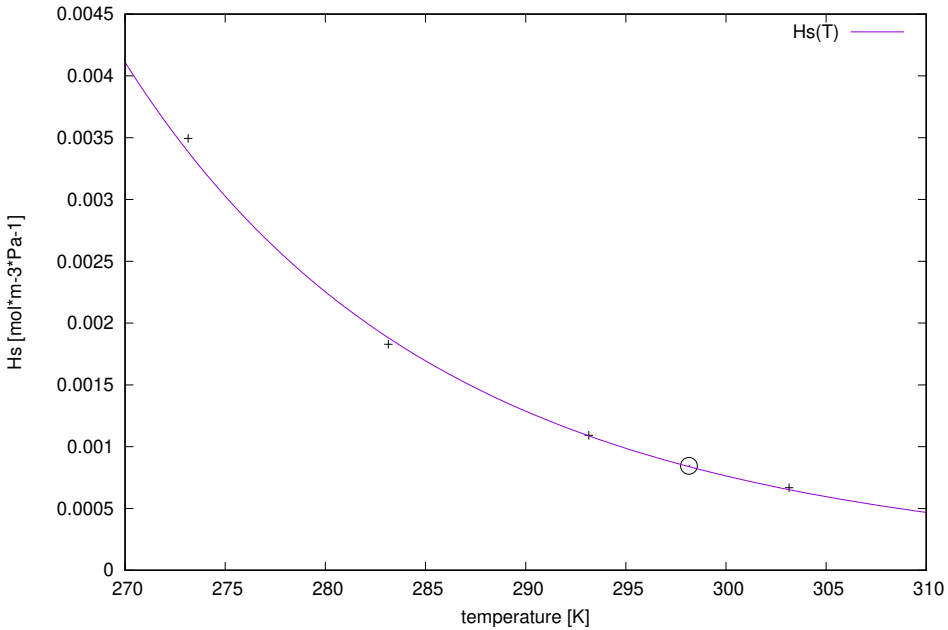

ref = 863; chem = 1,1-dichloroethane; casrn = 75-34-3; r2 = 0.99855

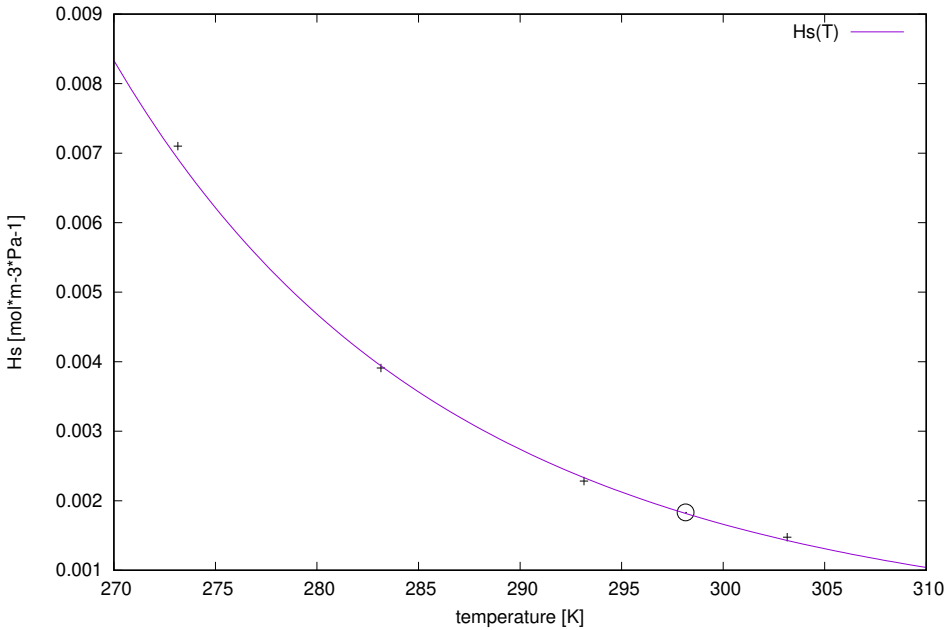

ref = 871; chem = molecular bromine; casrn = 7726-95-6; r2 = 0.99568

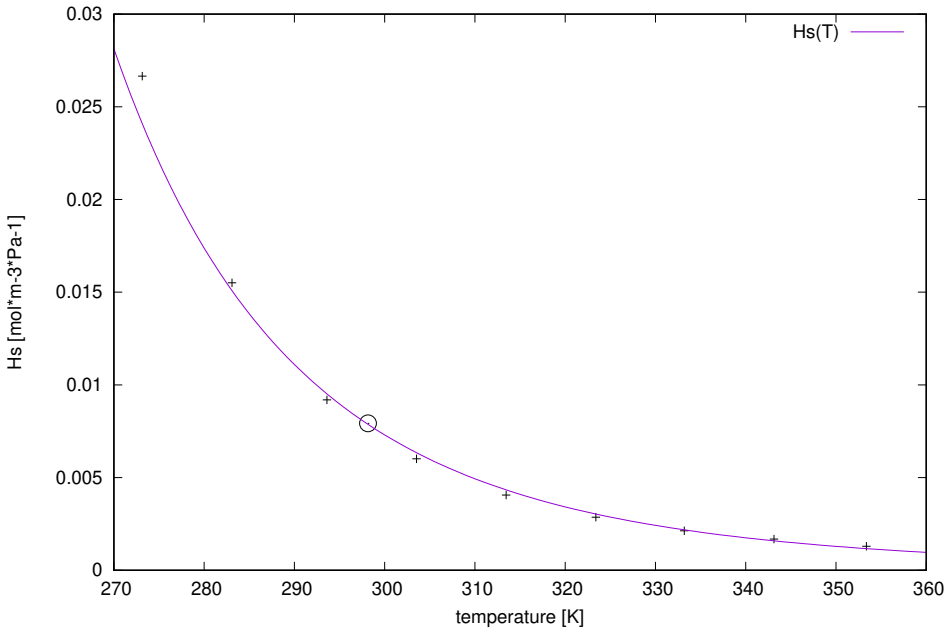

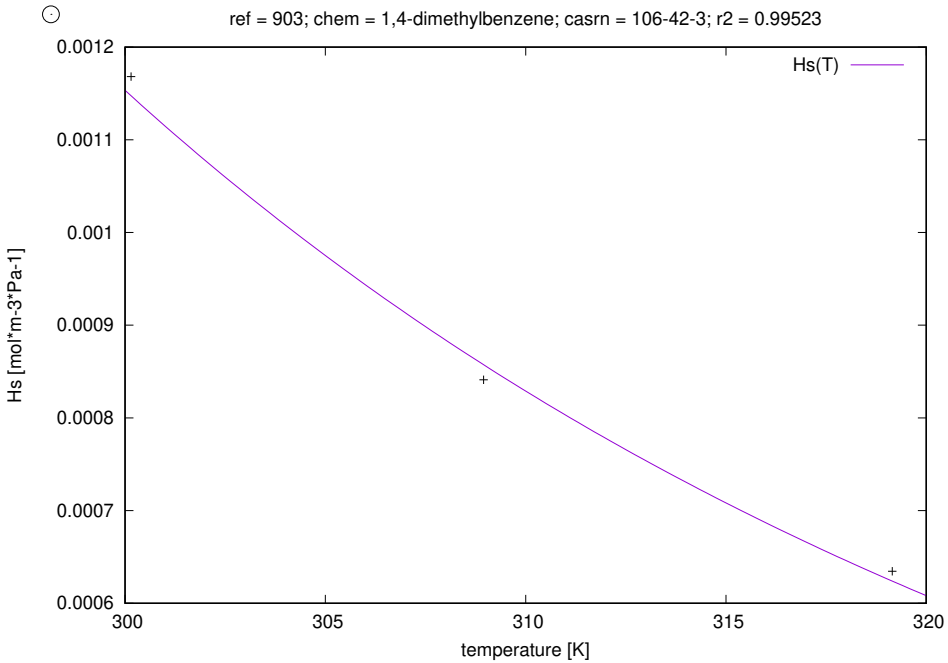

ref = 903; chem = bromobenzene; casrn = 108-86-1; r2 = 0.99888

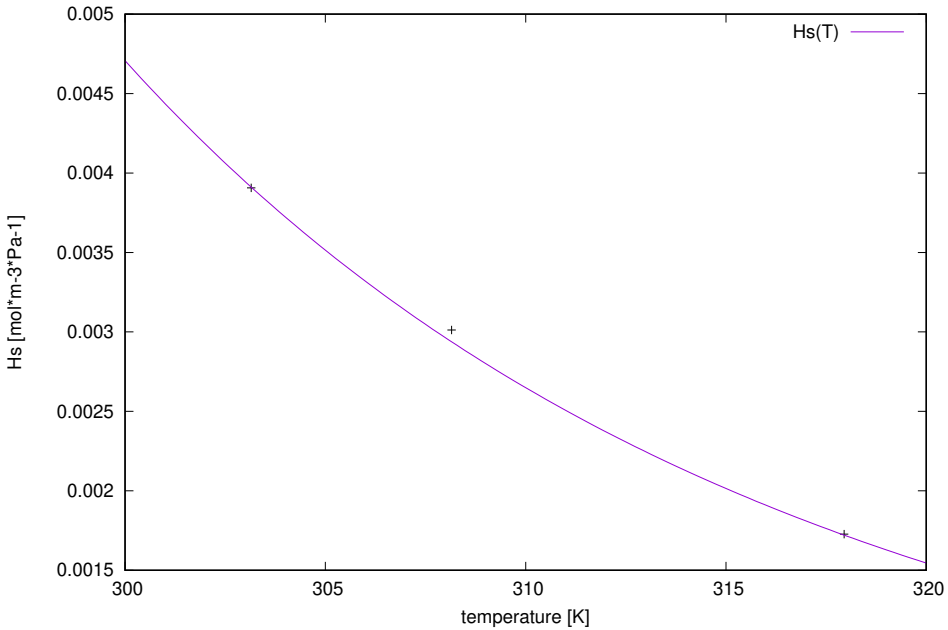

ref = 903; chem = methylcyclohexane; casrn = 108-87-2; r2 = 0.99098

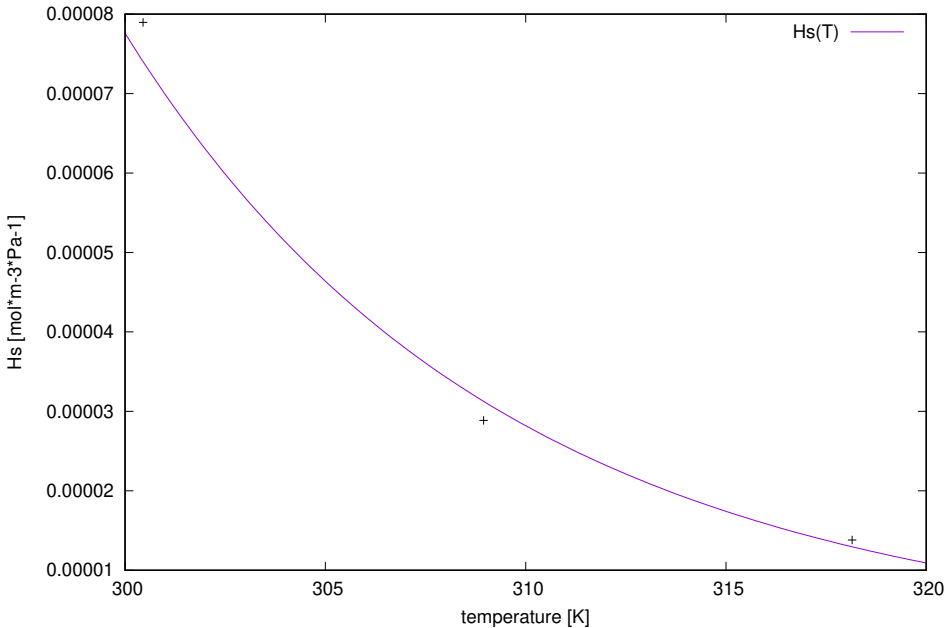

ref = 903; chem = octane; casrn = 111-65-9; r2 = 0.96147

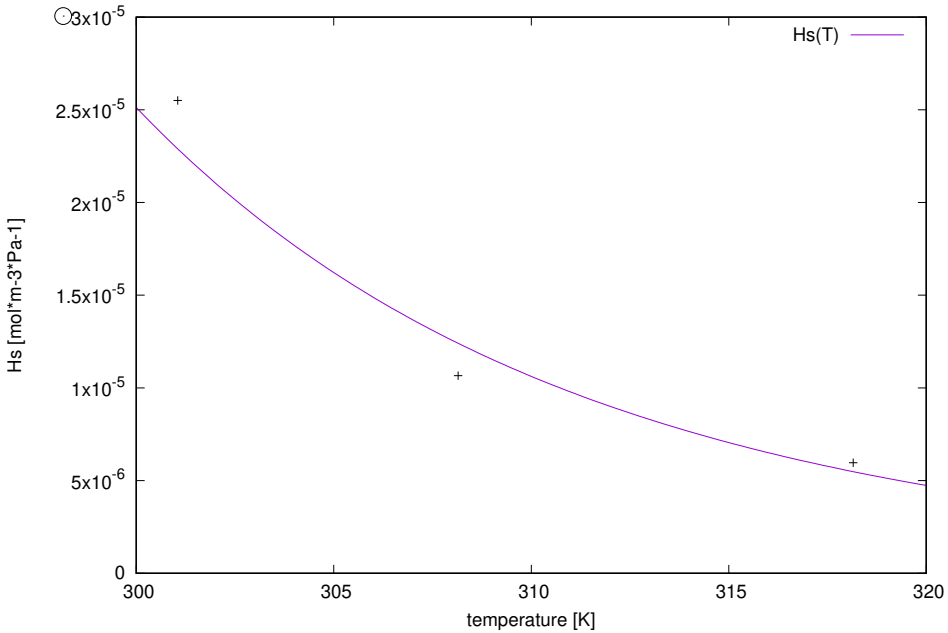

ref = 903; chem = hexachlorobenzene; casrn = 118-74-1; r2 = 1.00000

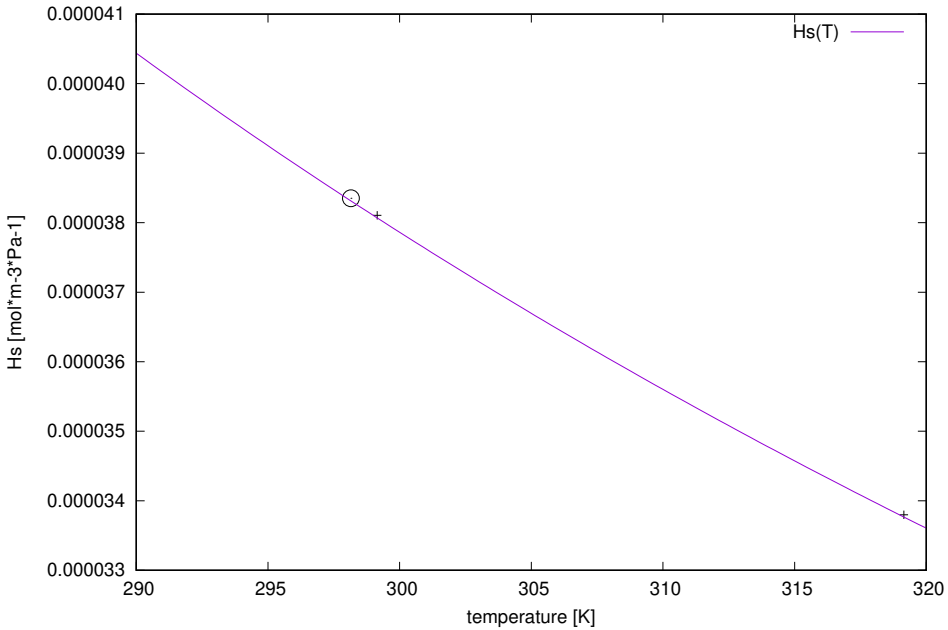



ref = 903; chem = heptane; casrn = 142-82-5; r2 = 0.96905

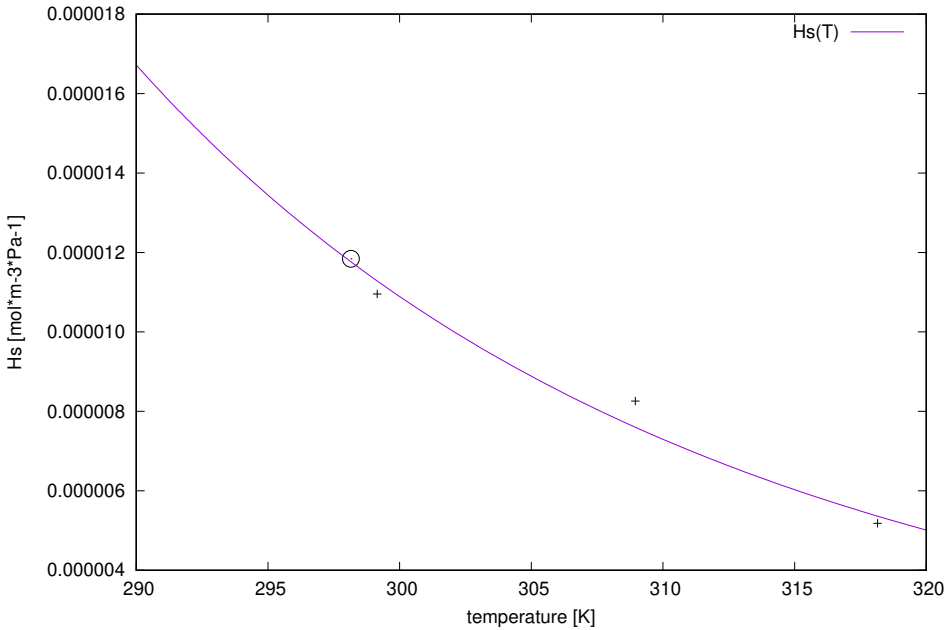

ref = 903; chem = (E)-1,2-dichloroethene; casrn = 156-60-5; r2 = 0.96605

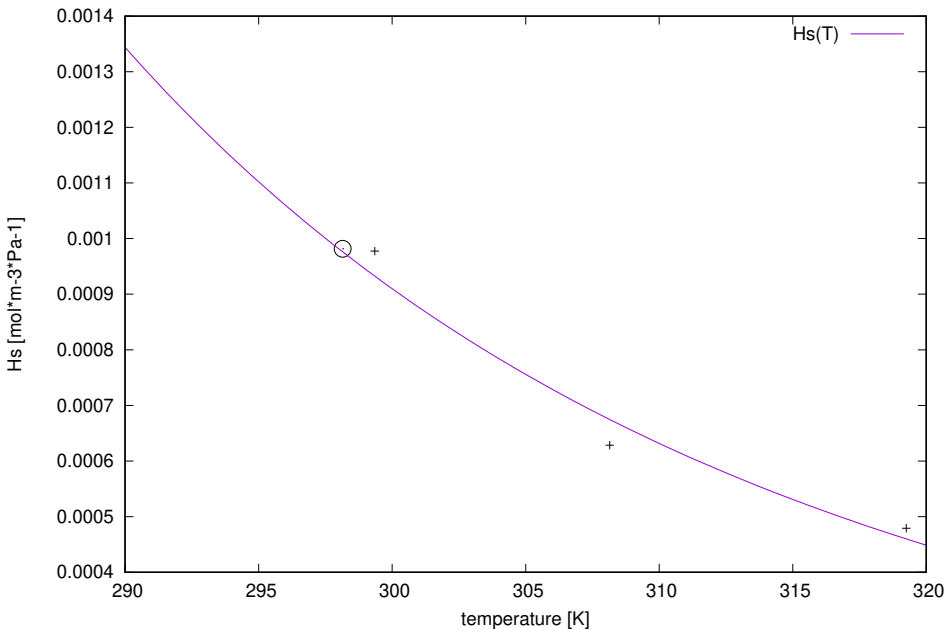

ref = 903; chem = cyclopentane; casrn = 287-92-3; r2 = 0.96880

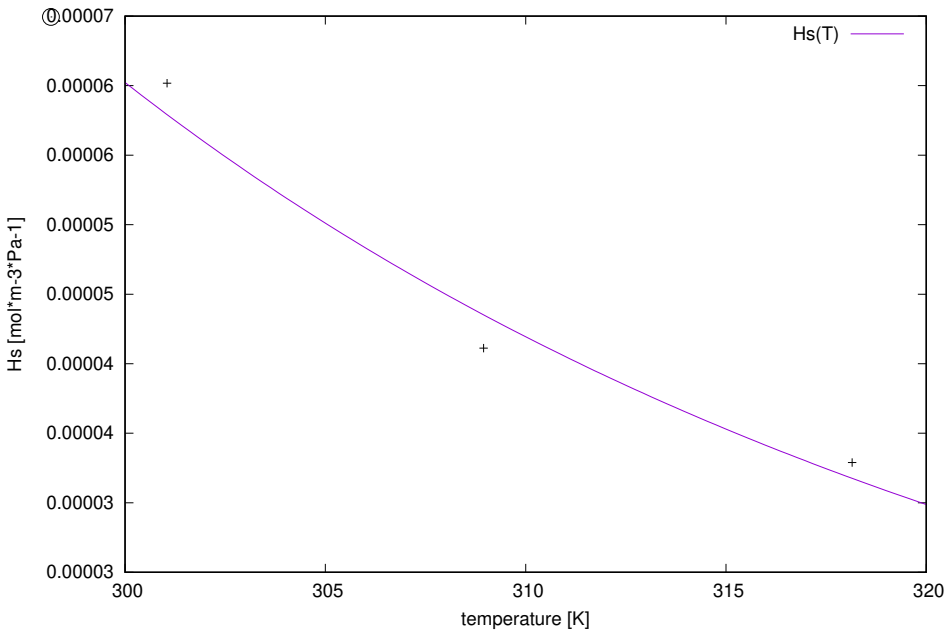

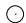

ref = 903; chem = tetrachloromethane; casrn = 56-23-5; r2 = 0.99676

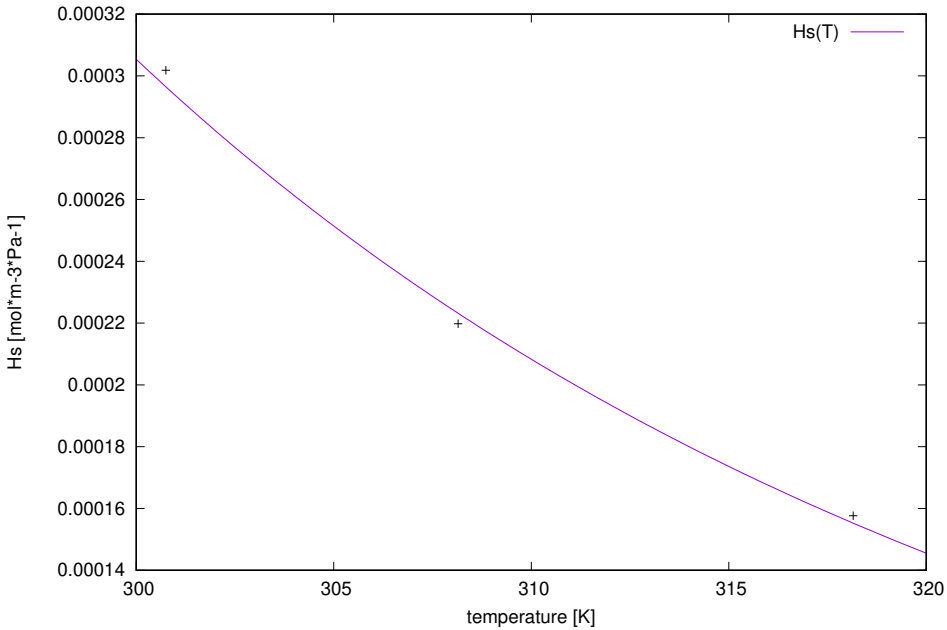

ref = 903; chem = 2-methylhexane; casrn = 591-76-4; r2 = 0.91728

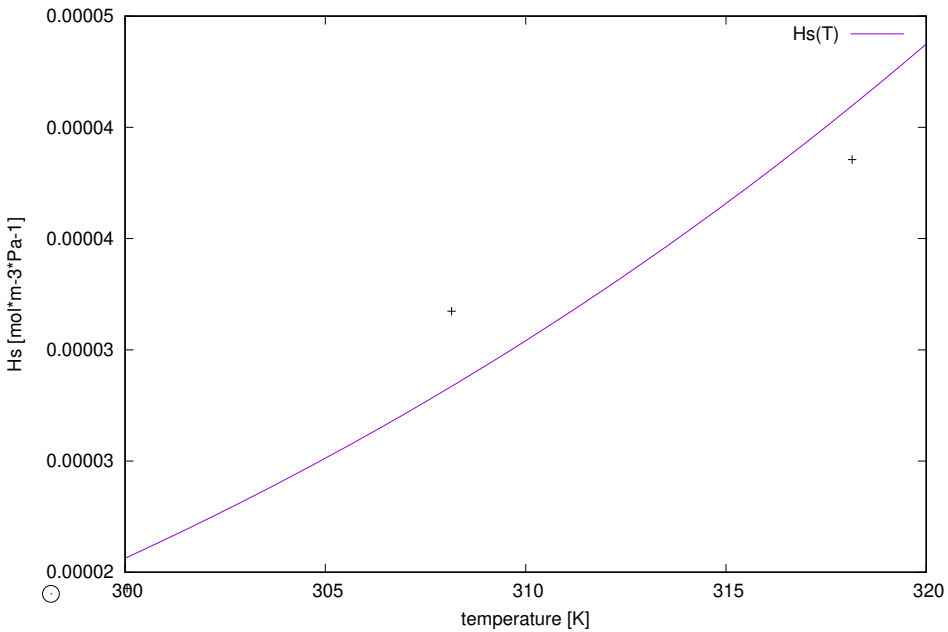

ref = 903; chem = 1,1,1-trichloroethane; casrn = 71-55-6; r2 = 0.99864

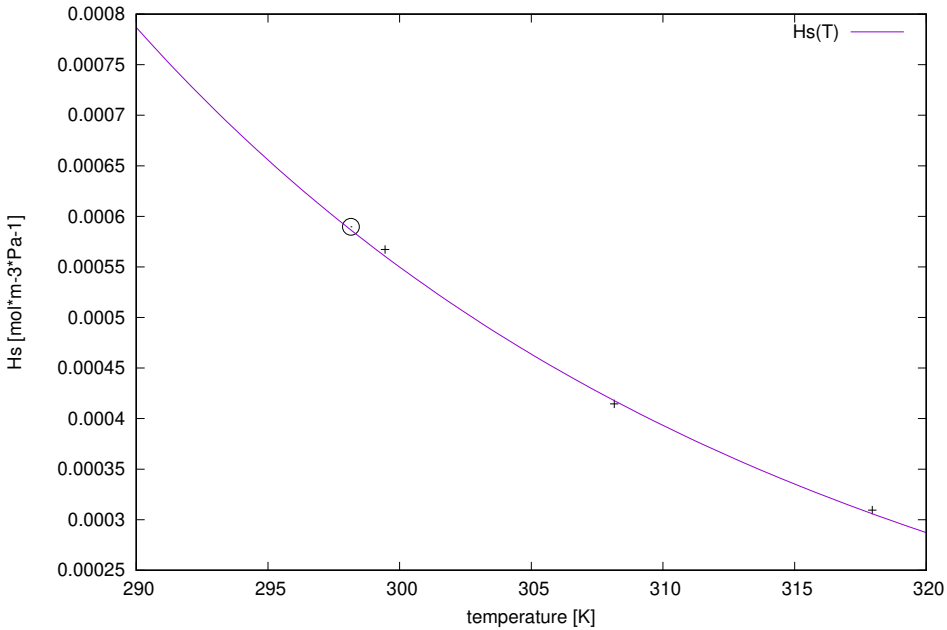

ref = 903; chem = 1,1,2-trichloroethane; casrn = 79-00-5; r2 = 0.96284

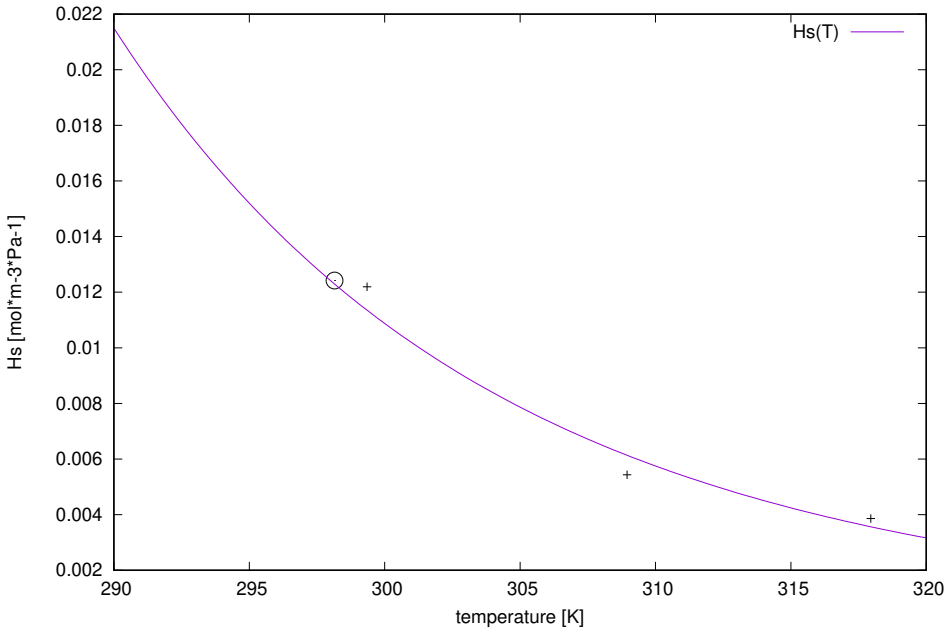

ref = 903; chem = 2-methylnaphthalene; casrn = 91-57-6; r2 = 0.99852

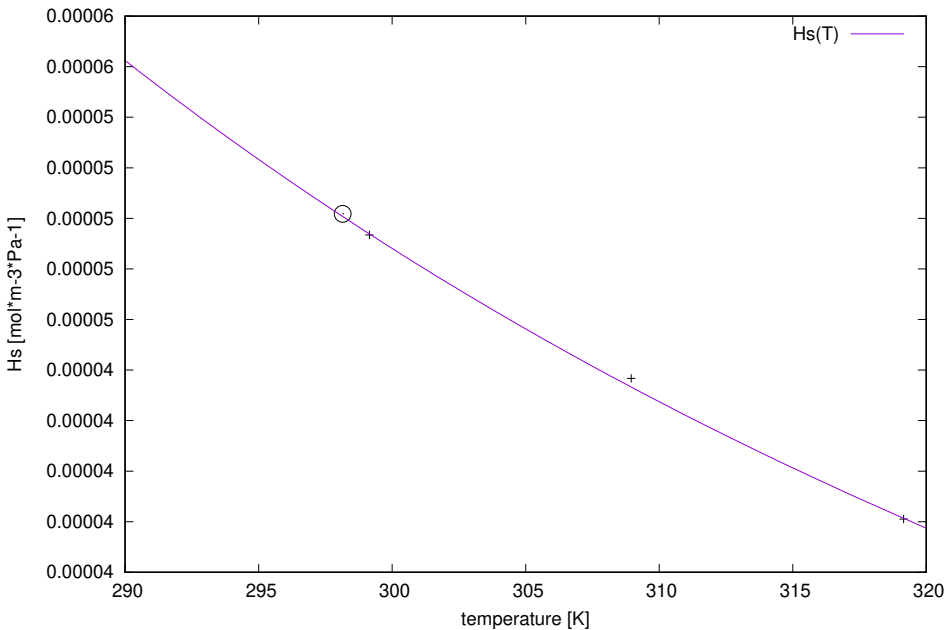



ref = 903; chem = 1,2,4-trimethylbenzene; casrn = 95-63-6; r2 = 0.97878

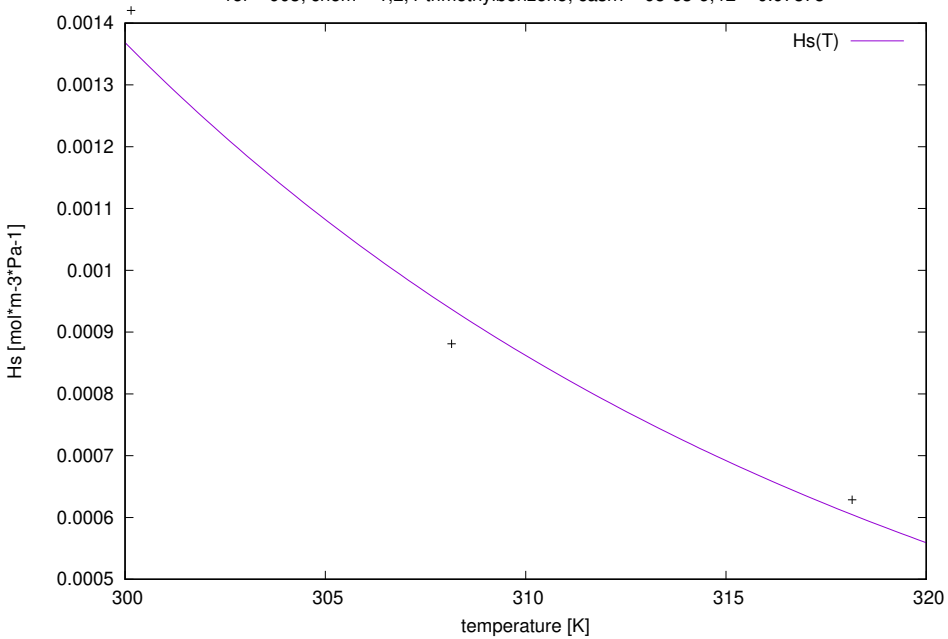

ref = 903; chem = (2-propyl)-benzene; casrn = 98-82-8; r2 = 0.97538

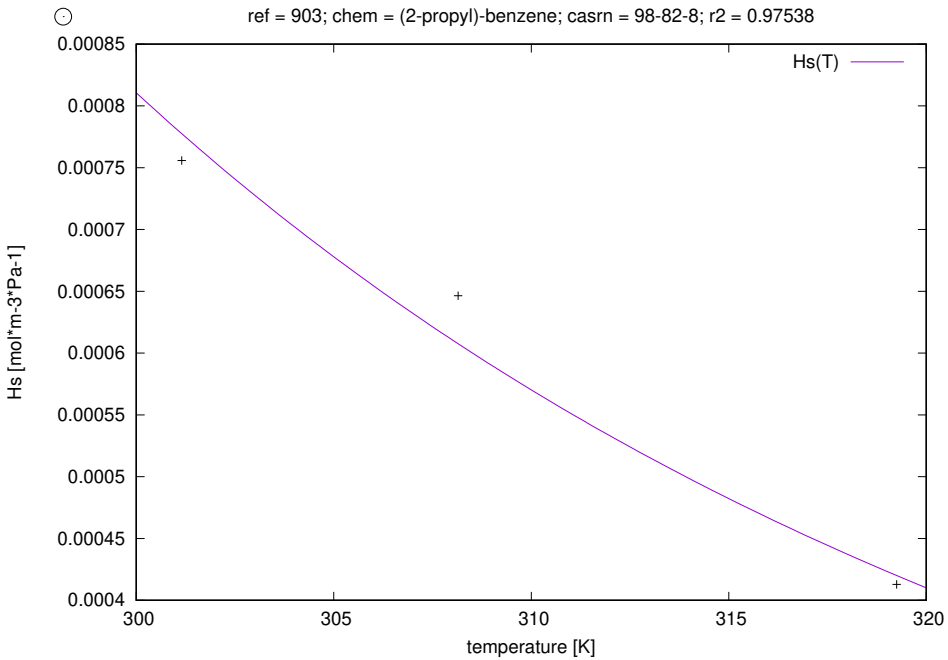

ref = 921; chem = carbon dioxide; casrn = 124-38-9; r2 = 0.99997

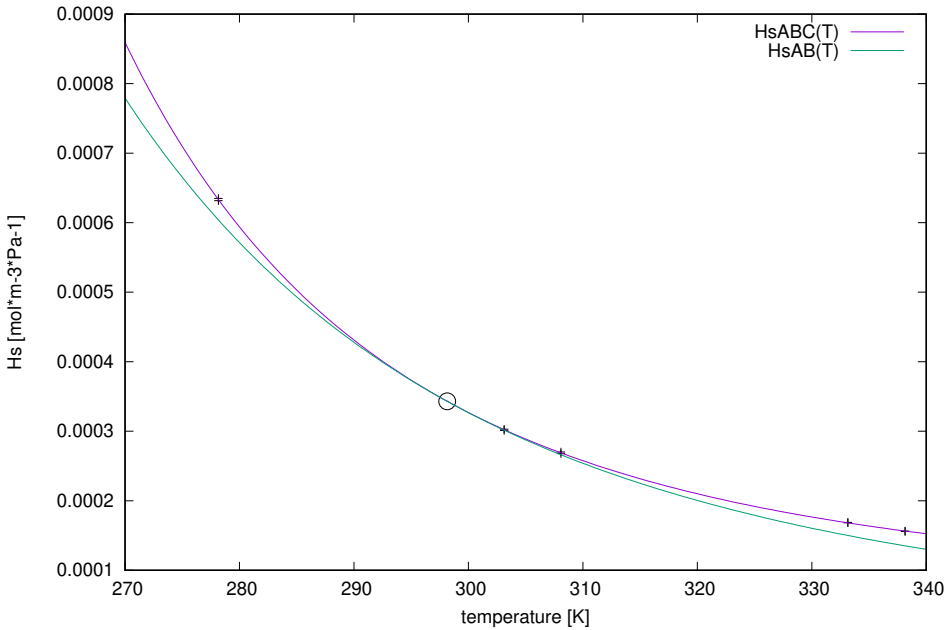

ref = 921; chem = 1,1-difluoroethane; casrn = 75-37-6; r2 = 0.99997

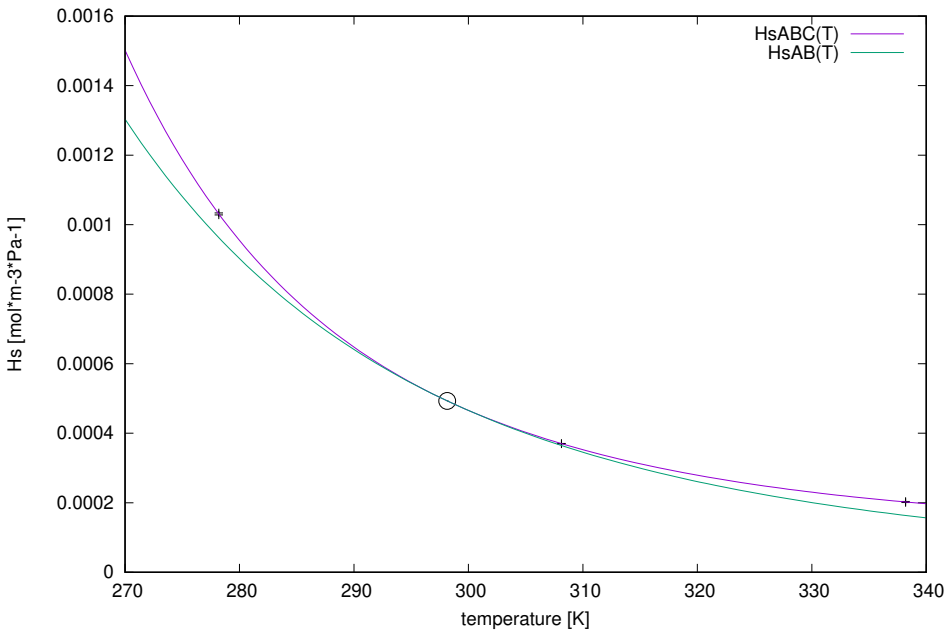

ref = 921; chem = chlorodifluoromethane; casrn = 75-45-6; r2 = 0.99997

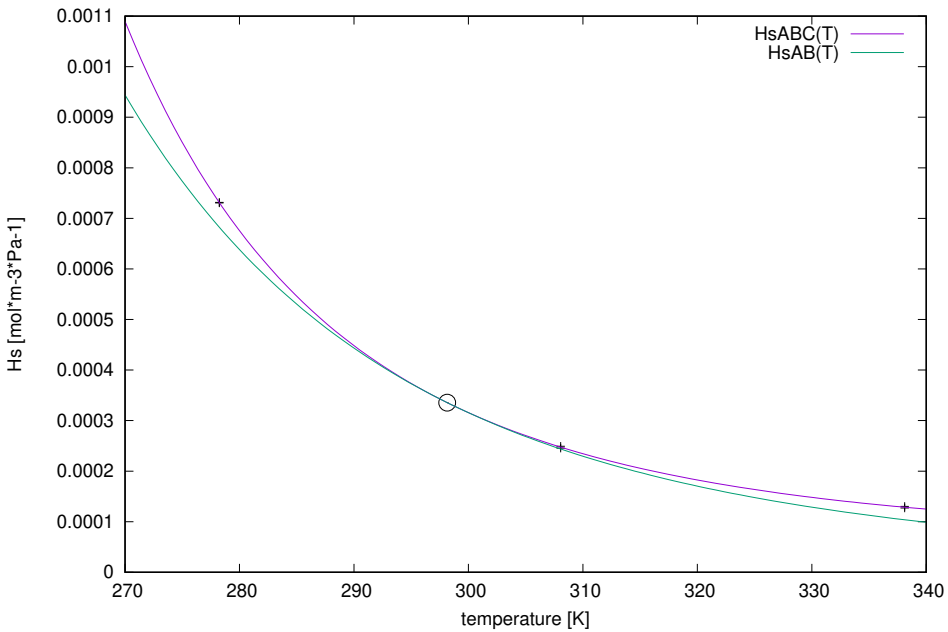

ref = 921; chem = trifluoromethane; casrn = 75-46-7; r2 = 0.99998

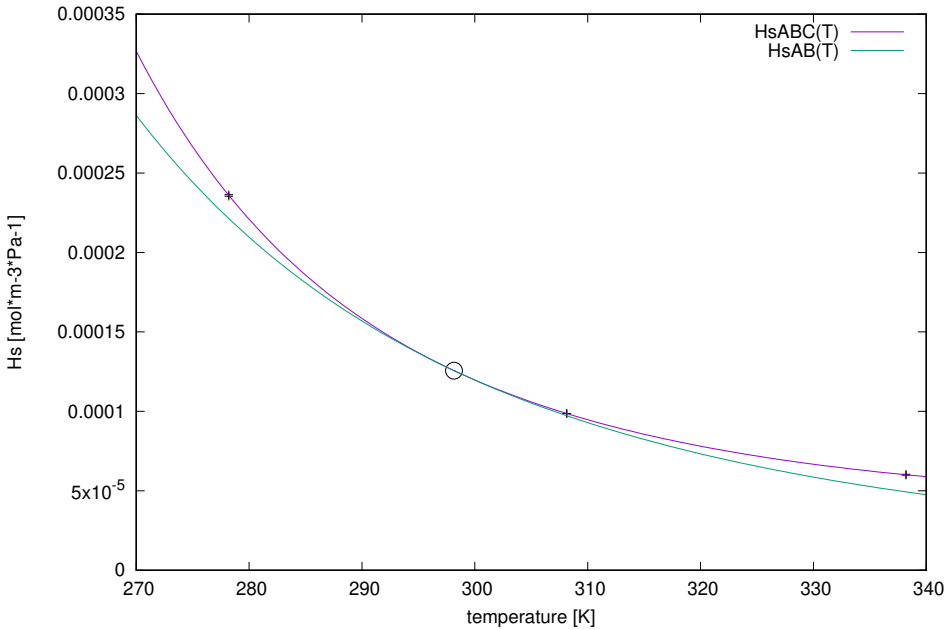

ref = 921; chem = 1,1,1,2-tetrafluoroethane; casrn = 811-97-2; r2 = 0.99977

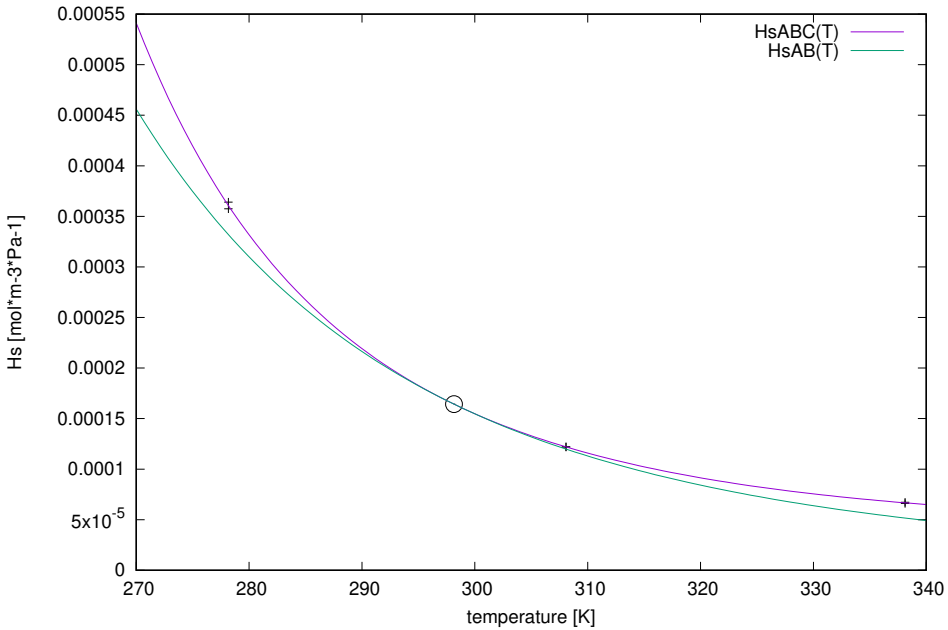

ref = 923; chem = R1270; casrn = 115-07-1; r2 = 1.00000

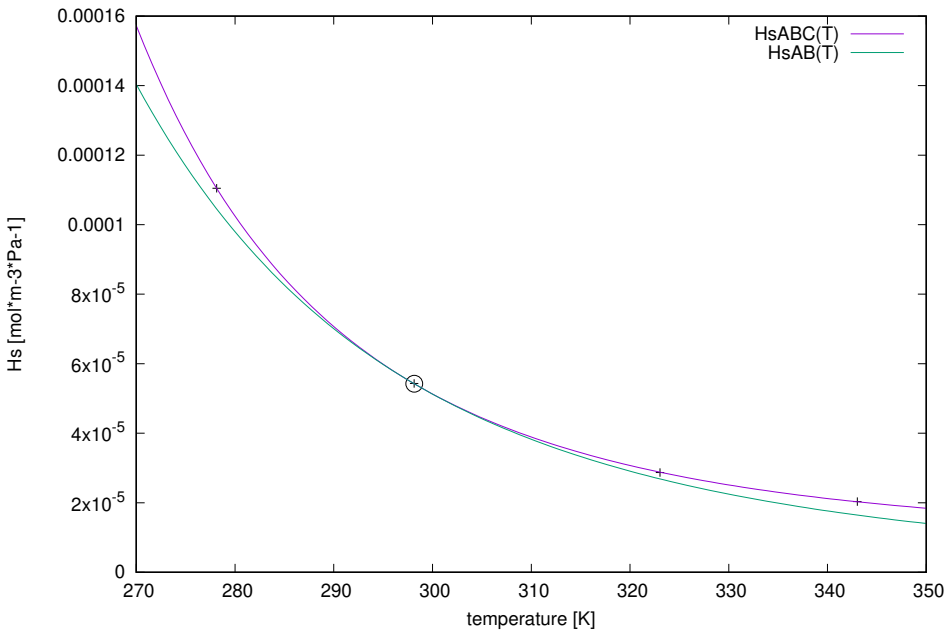



ref = 923; chem = R1216; casrn = 116-15-4; r2 = 0.99998

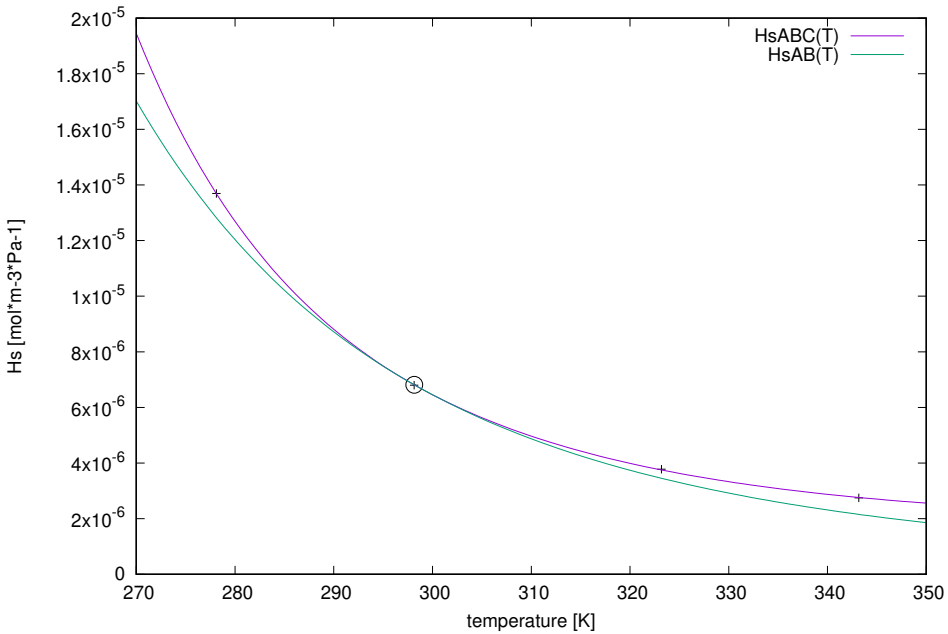

ref = 923; chem = R141b; casrn = 1717-00-6; r2 = 1.00000

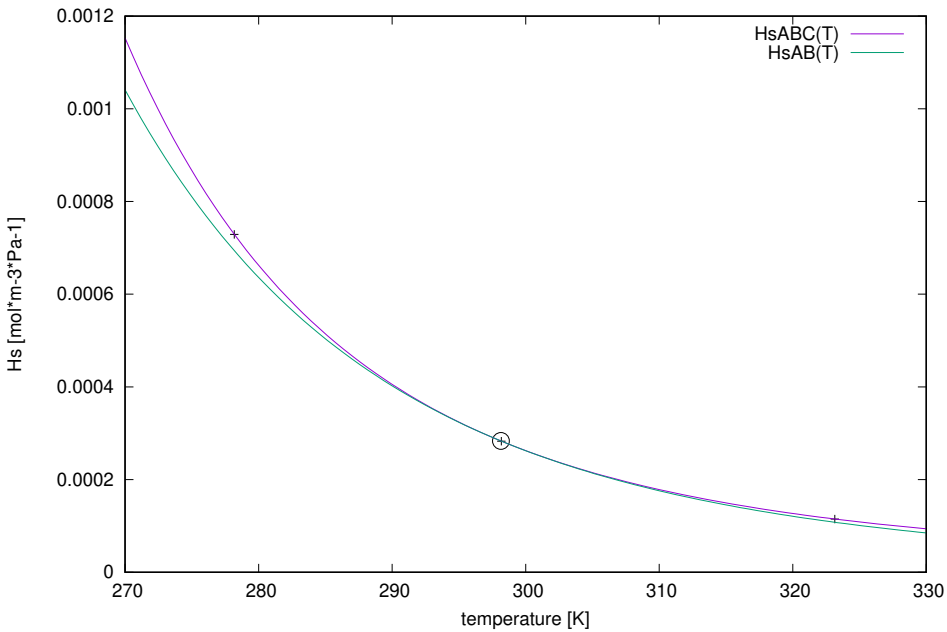

ref = 923; chem = R124; casrn = 2837-89-0; r2 = 0.99998

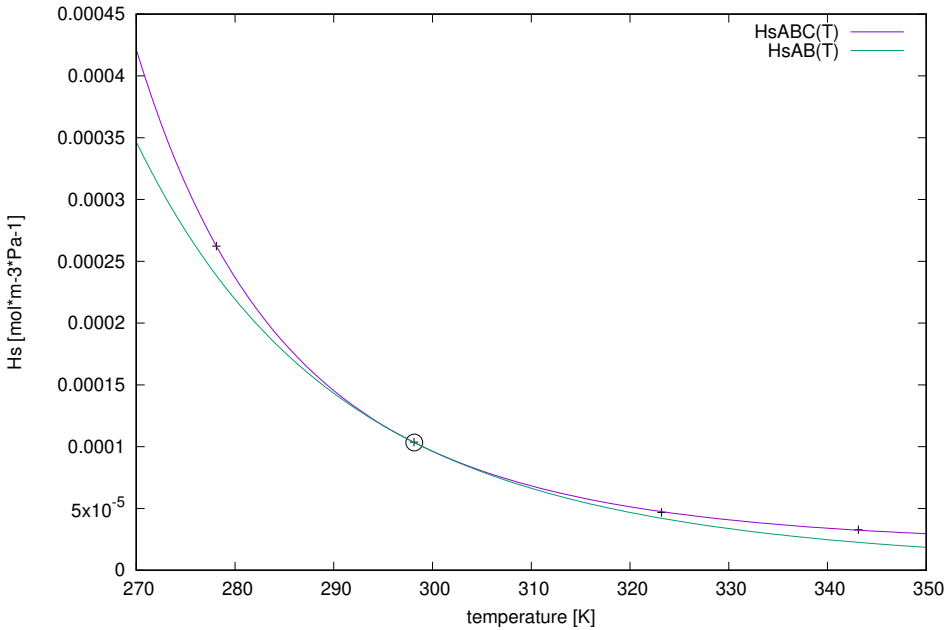

ref = 923; chem = R1122; casrn = 359-10-4; r2 = 0.99999

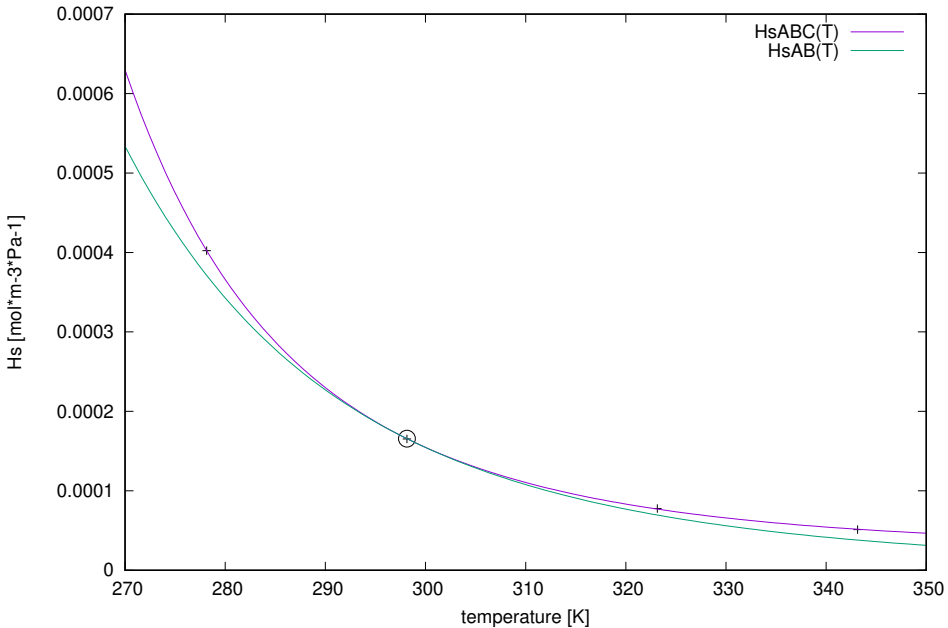

ref = 923; chem = R1150; casrn = 74-85-1; r2 = 1.00000

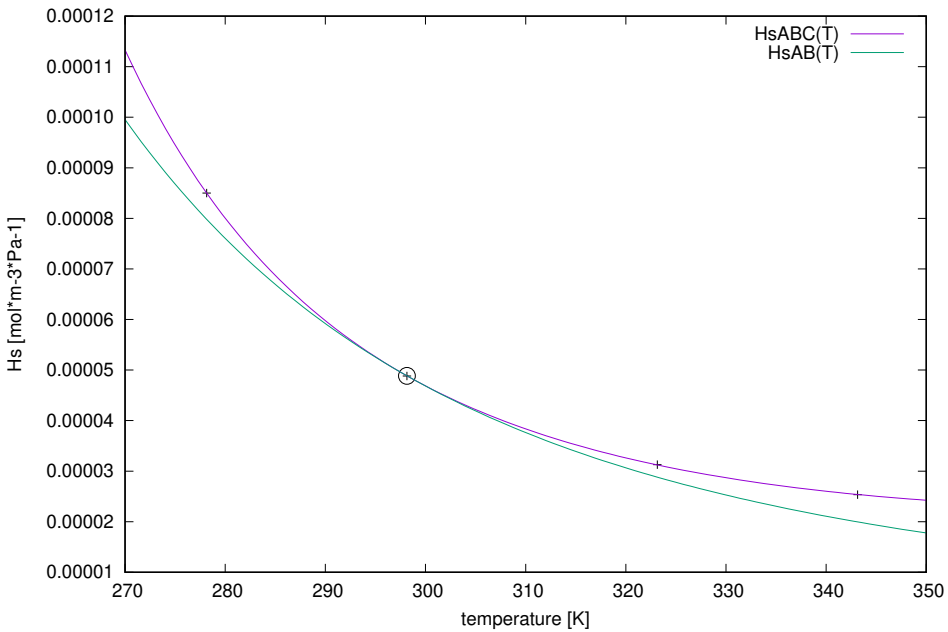

ref = 923; chem = R160; casrn = 75-00-3; r2 = 1.00000

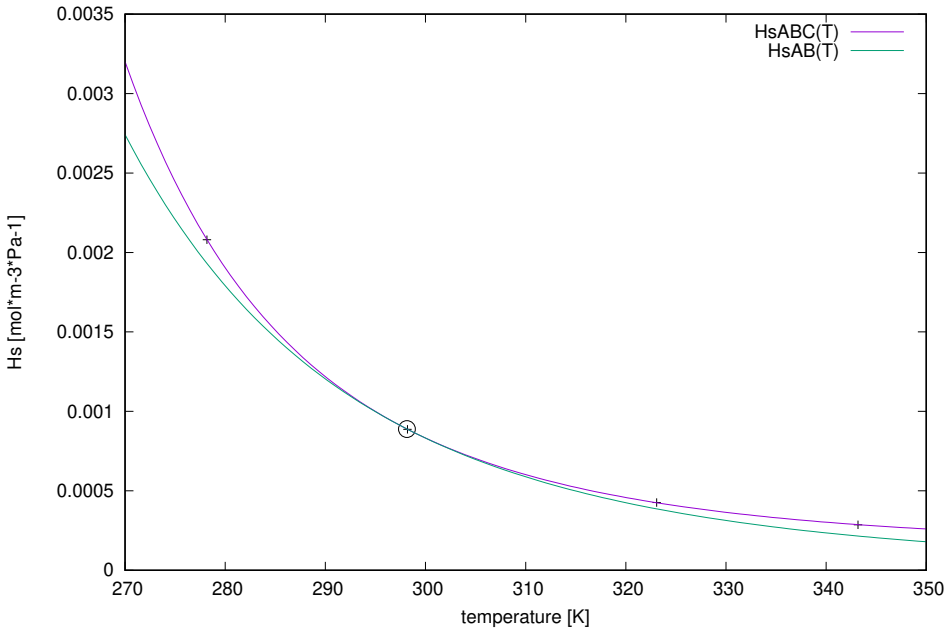

ref = 923; chem = R32; casrn = 75-10-5; r2 = 0.99995

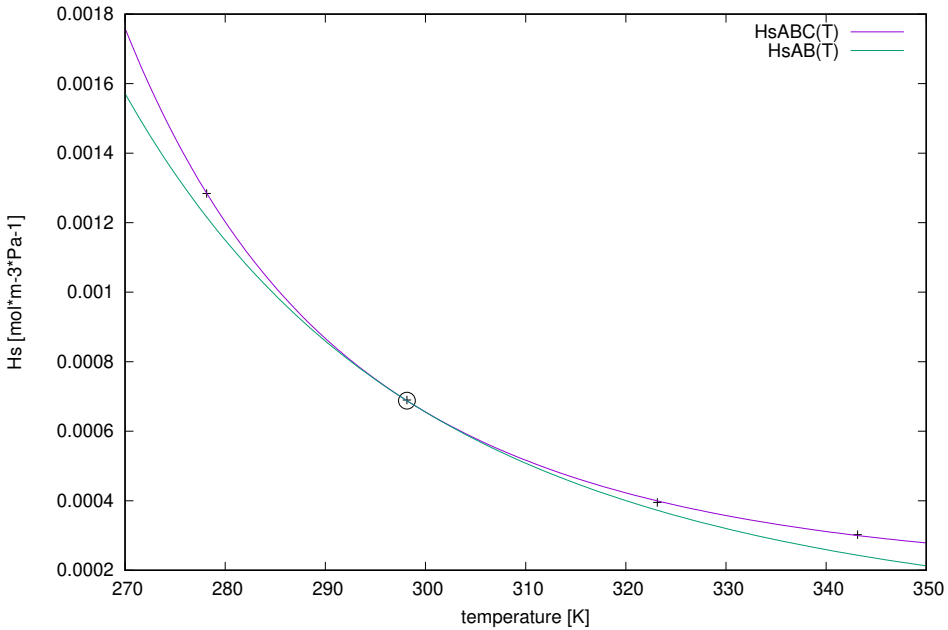

ref = 923; chem = R152a; casrn = 75-37-6; r2 = 1.00000

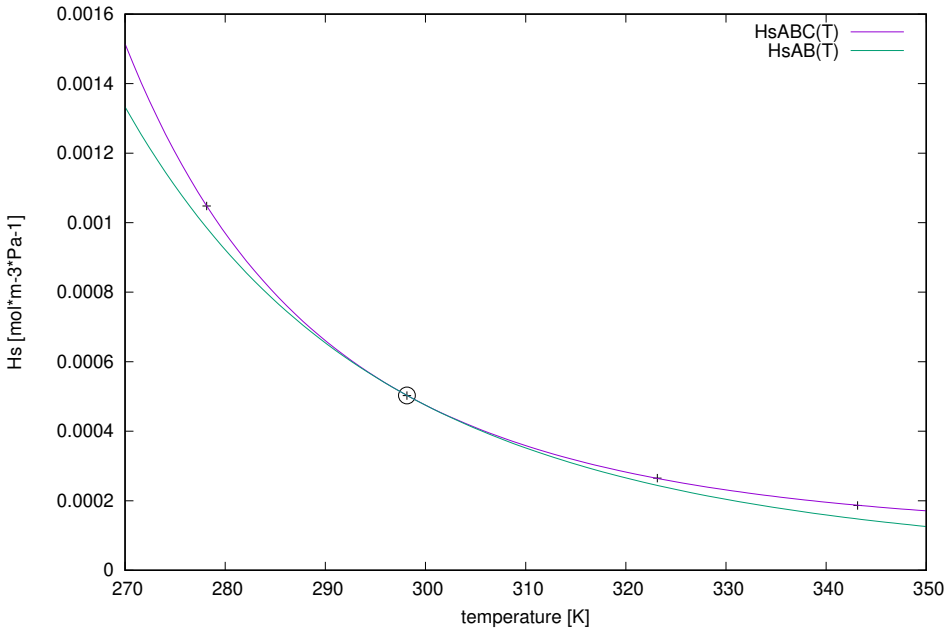



ref = 923; chem = R22; casrn = 75-45-6; r2 = 0.99999

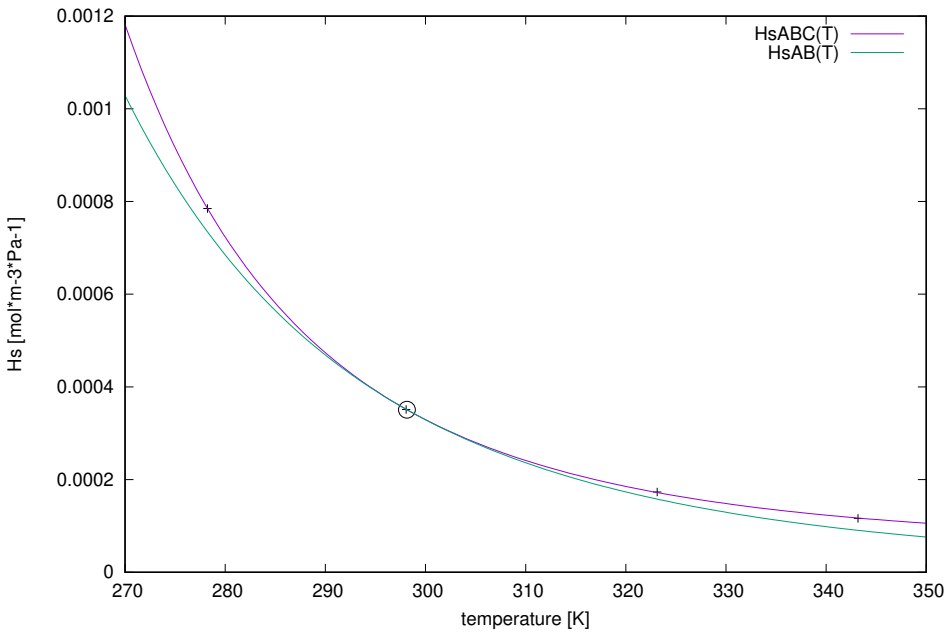

ref = 923; chem = R23; casrn = 75-46-7; r2 = 0.99999

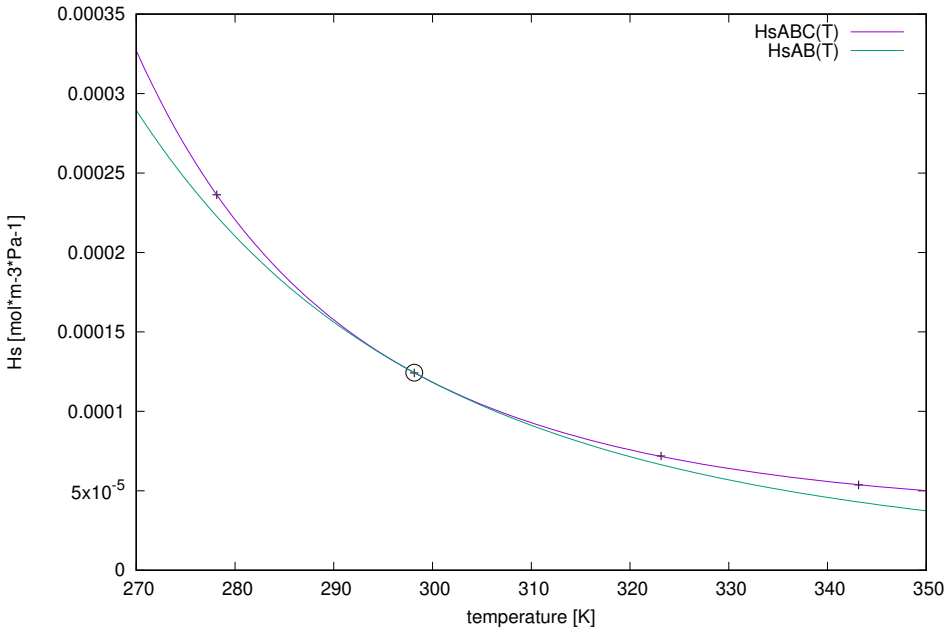

ref = 923; chem = R142b; casrn = 75-68-3; r2 = 1.00000

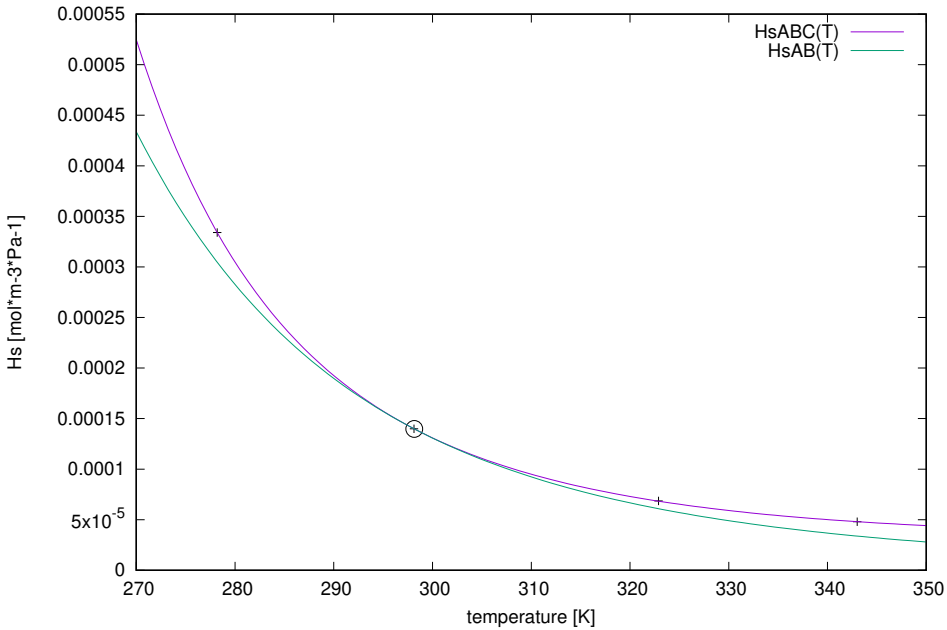

ref = 923; chem = R11; casrn = 75-69-4; r2 = 0.99999

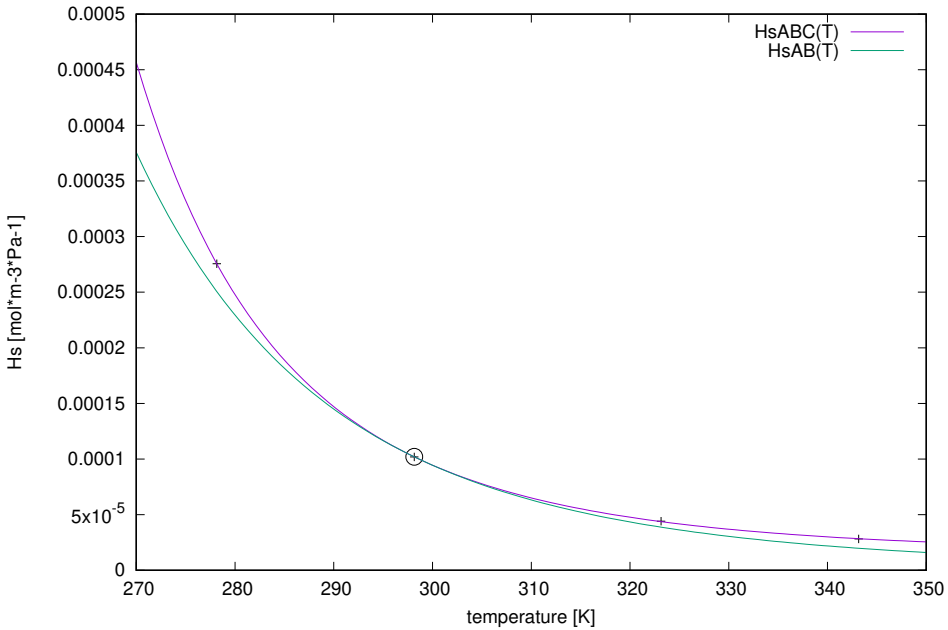

ref = 923; chem = R133a; casrn = 75-88-7; r2 = 1.00000

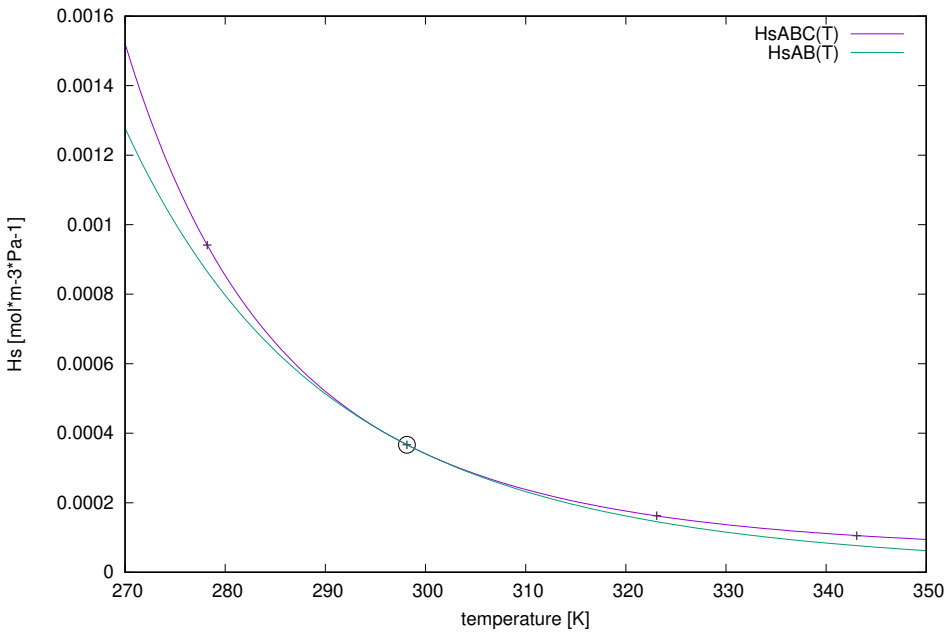

ref = 923; chem = R134a; casrn = 811-97-2; r2 = 0.99999

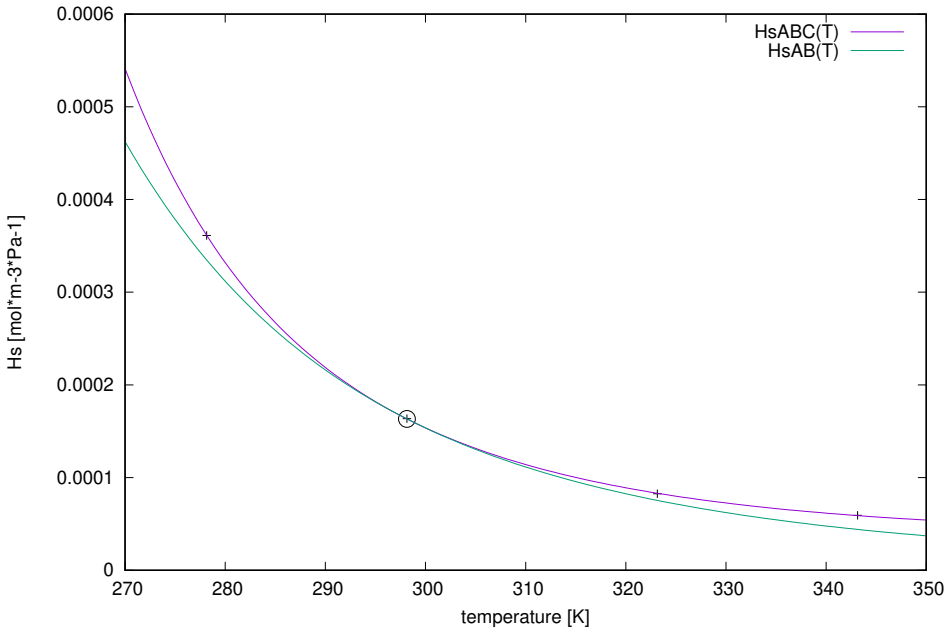

ref = 983; chem = dimethyl sulfide; casrn = 75-18-3; r2 = 0.99957

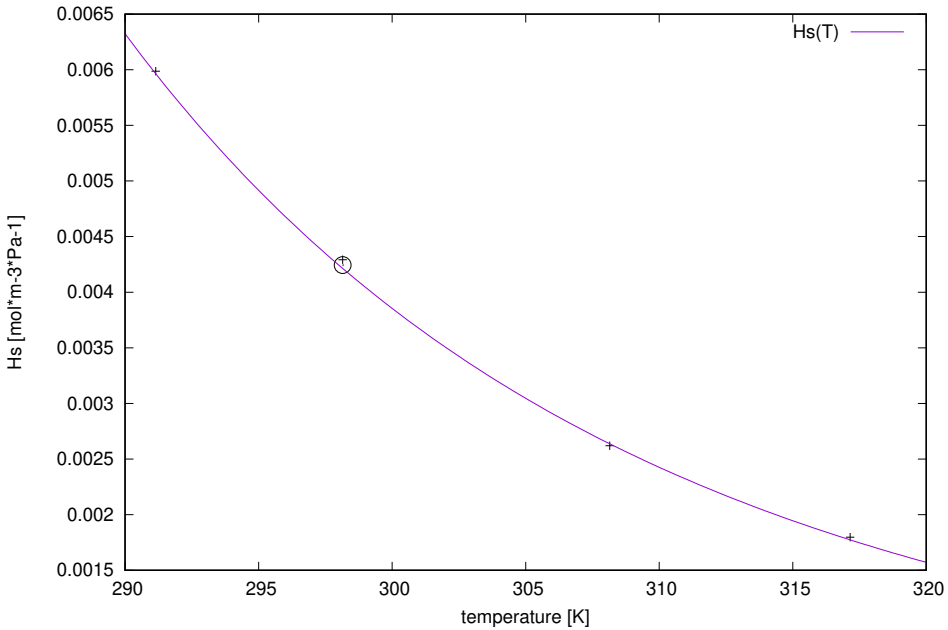

ref = 985; chem = benzaldehyde; casrn = 100-52-7; r2 = 0.99135

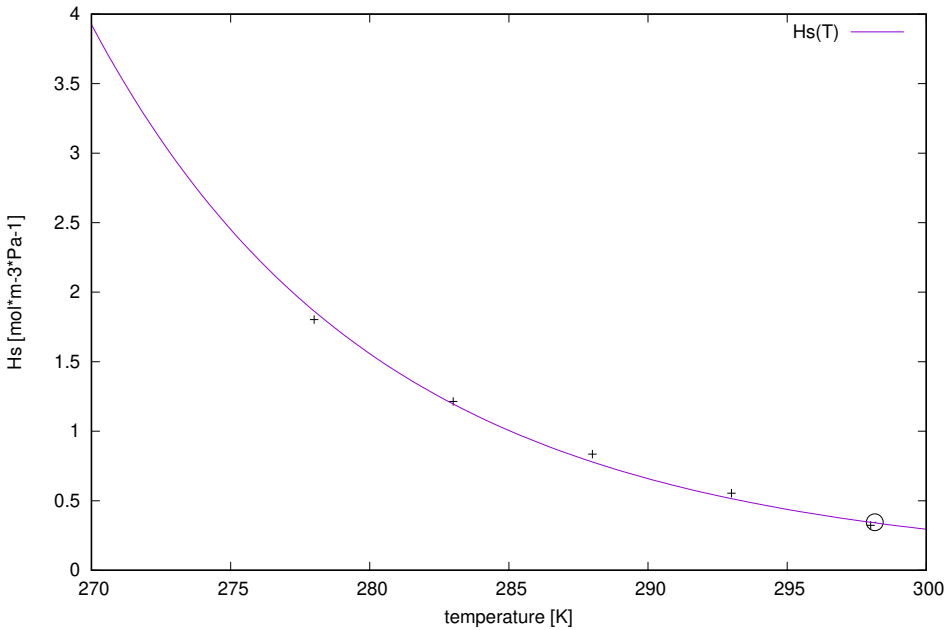



ref = 985; chem = 2-methylpropenal; casrn = 78-85-3; r2 = 0.99859

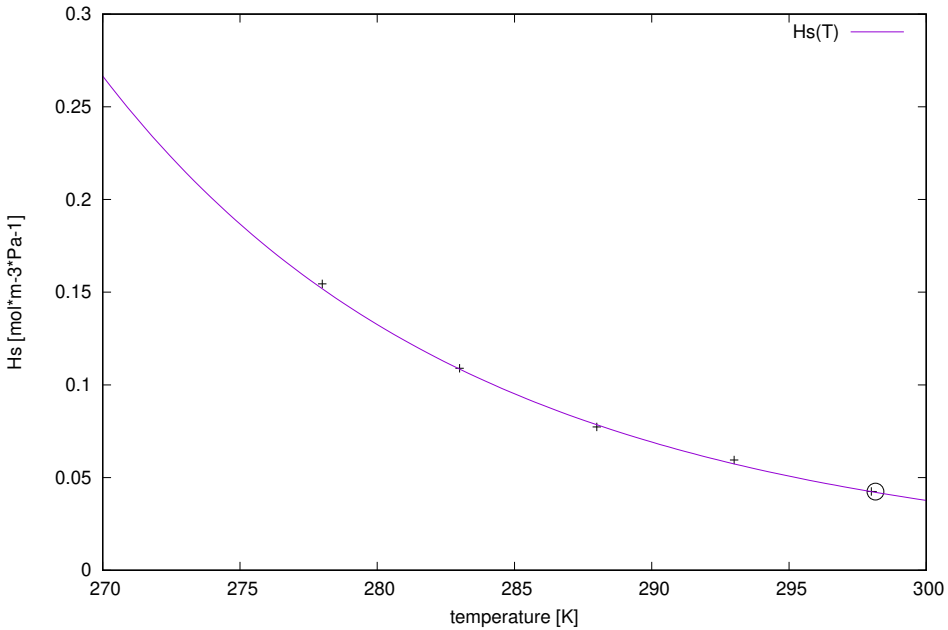

ref = 985; chem = 3-buten-2-one; casrn = 78-94-4; r2 = 0.99183

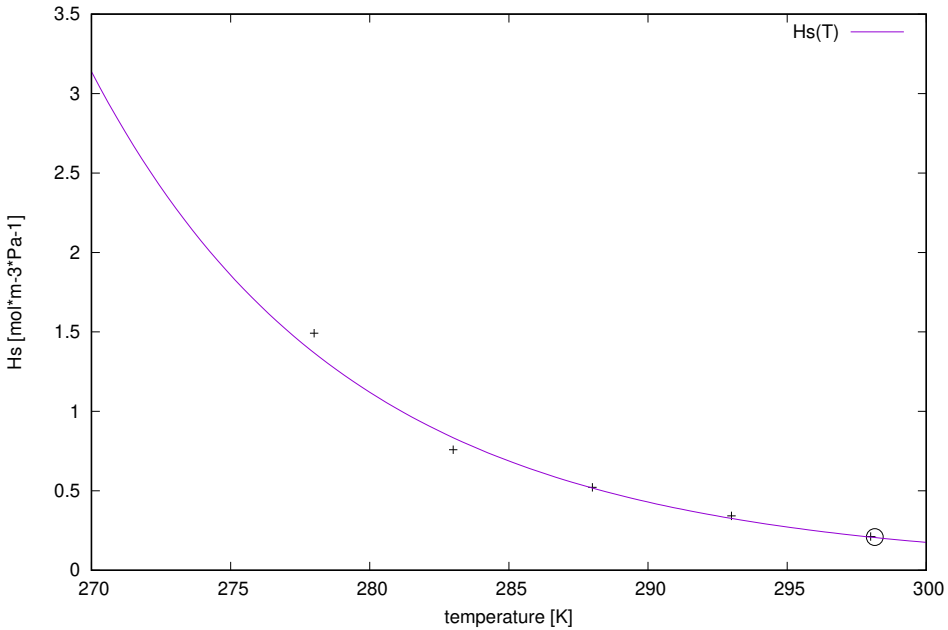

ref = 985; chem = 1-phenylethanone; casrn = 98-86-2; r2 = 0.98654

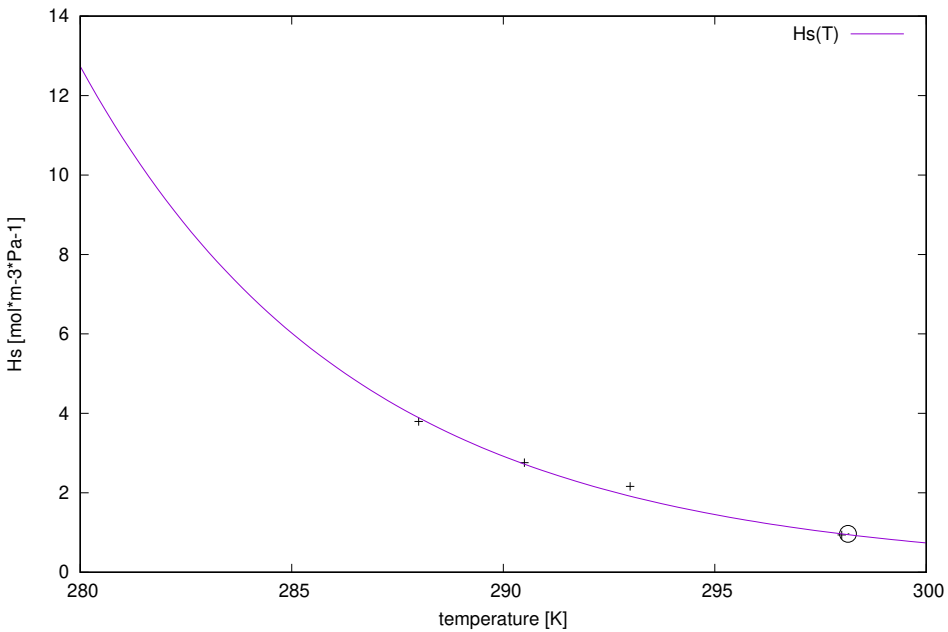

ref = 1014; chem = chlorodifluoromethane; casrn = 75-45-6; r2 = 0.99935

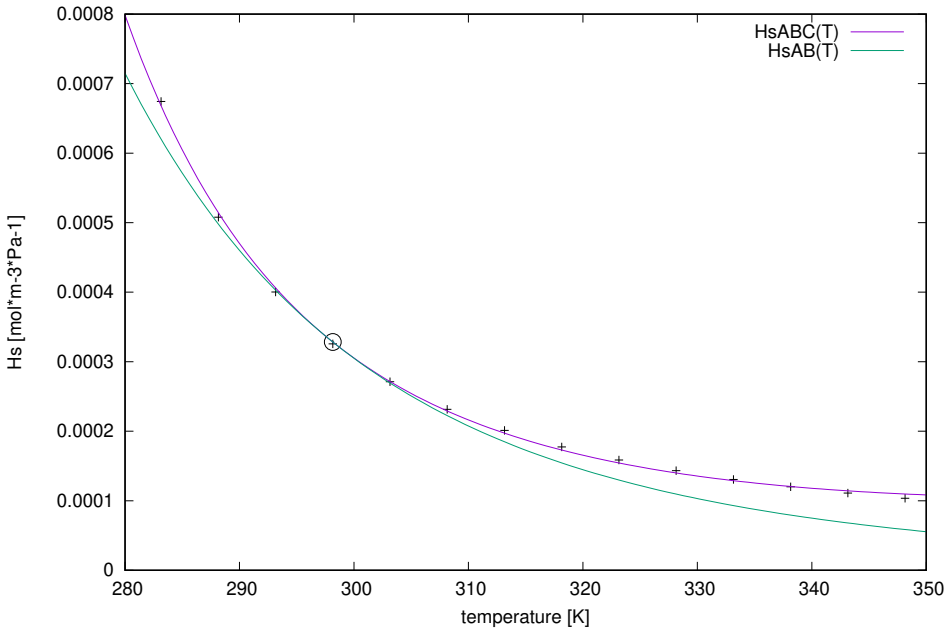

ref = 1026; chem = tetrachloroethene; casrn = 127-18-4; r2 = 1.00000

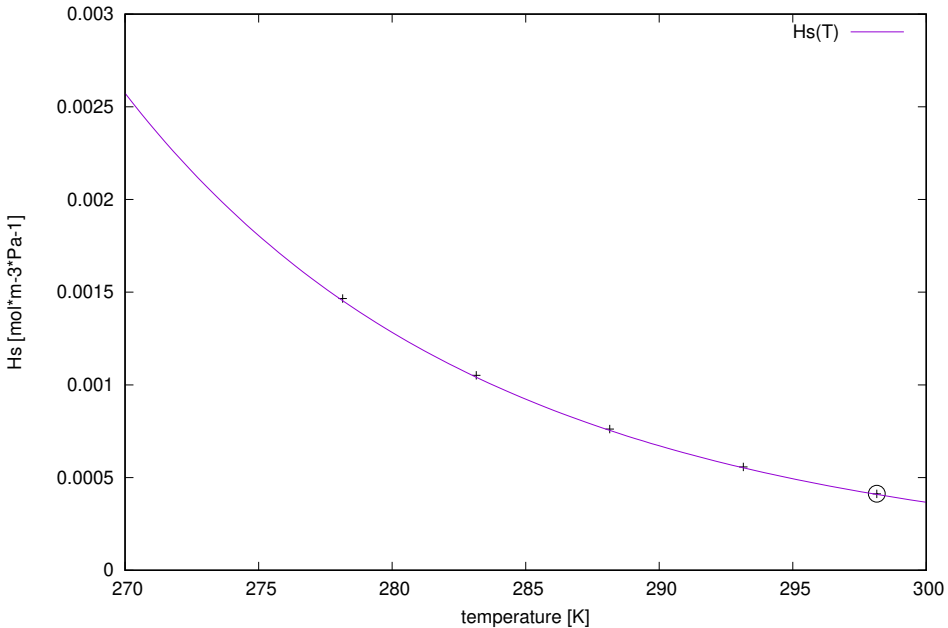

ref = 1026; chem = trichloromethane; casrn = 67-66-3; r2 = 0.99999

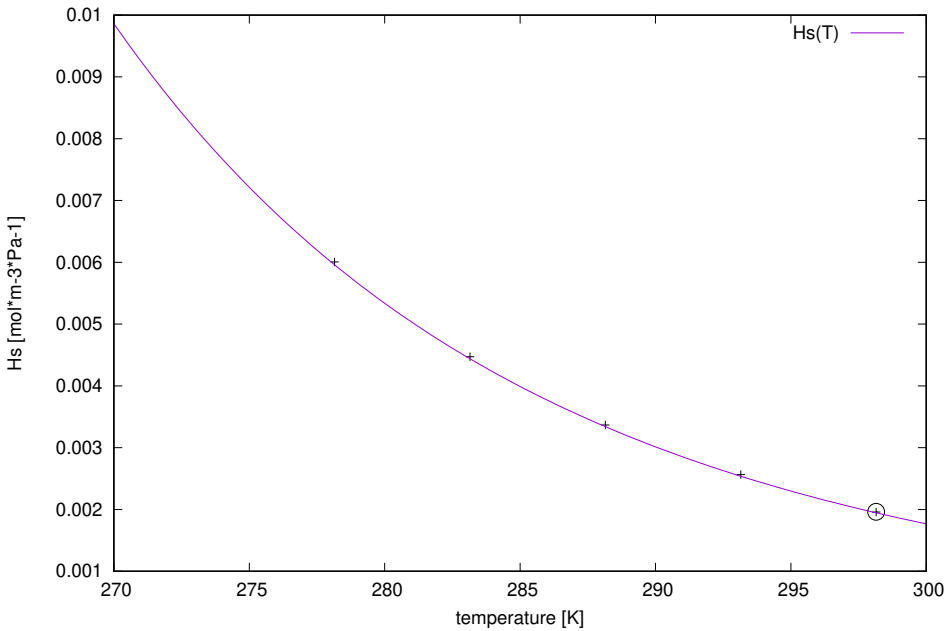

ref = 1026; chem = chloromethane; casrn = 74-87-3; r2 = 0.99998

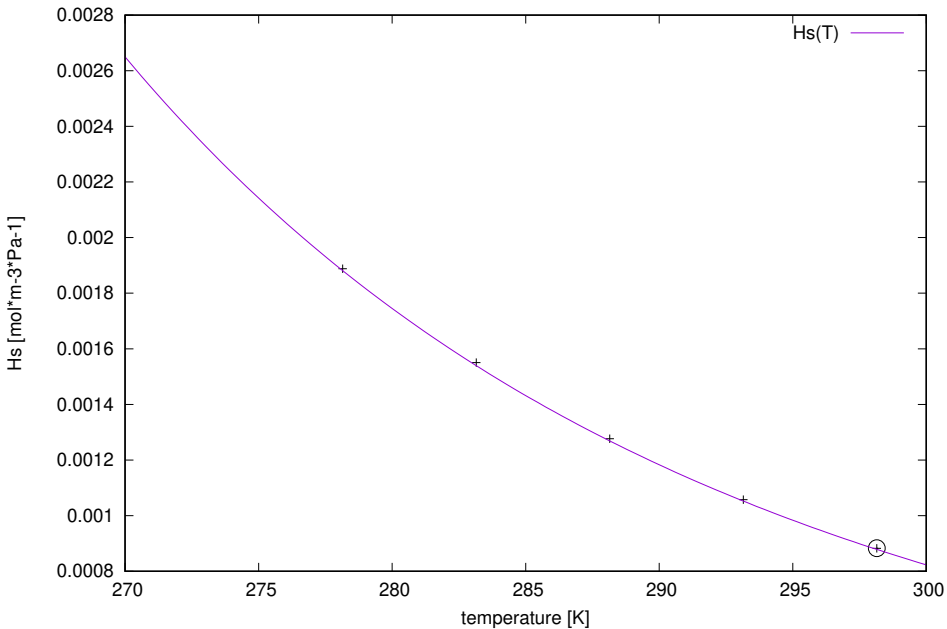

ref = 1026; chem = dichloromethane; casrn = 75-09-2; r2 = 0.99994

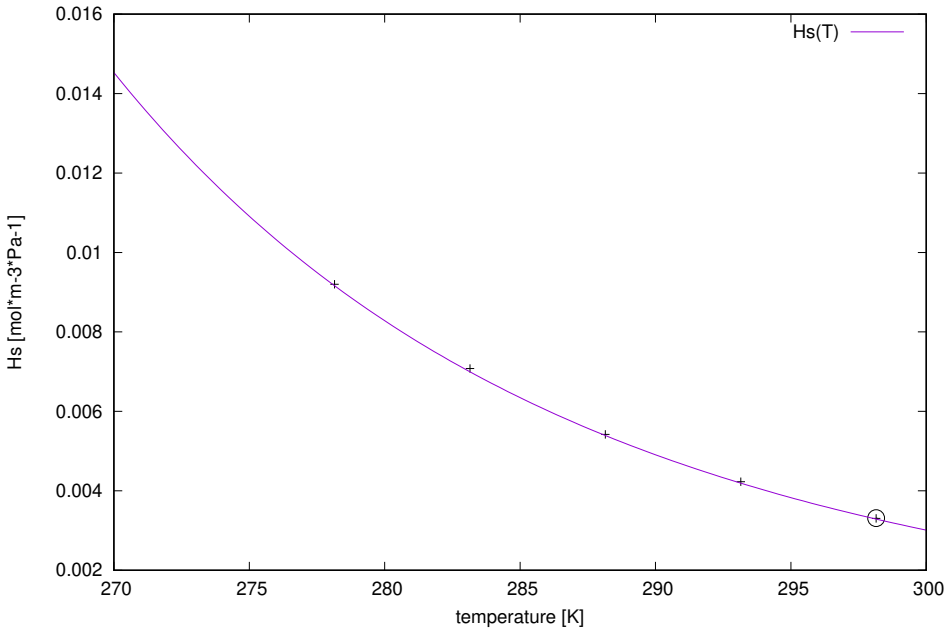



ref = 1026; chem = trichloroethene; casrn = 79-01-6; r2 = 1.00000

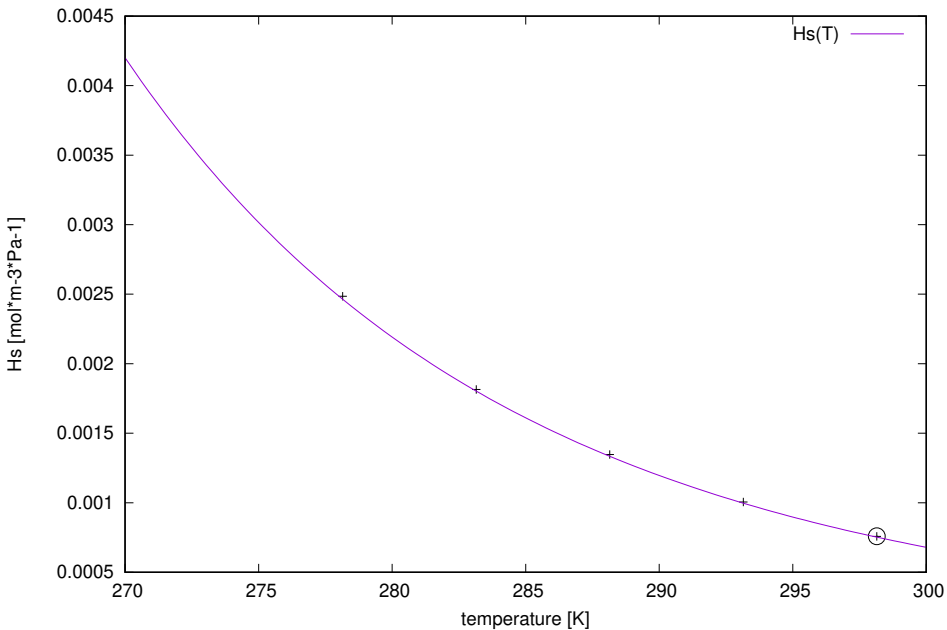

ref = 1072; chem = sulfur dioxide; casrn = 7446-09-5; r2 = 0.99916

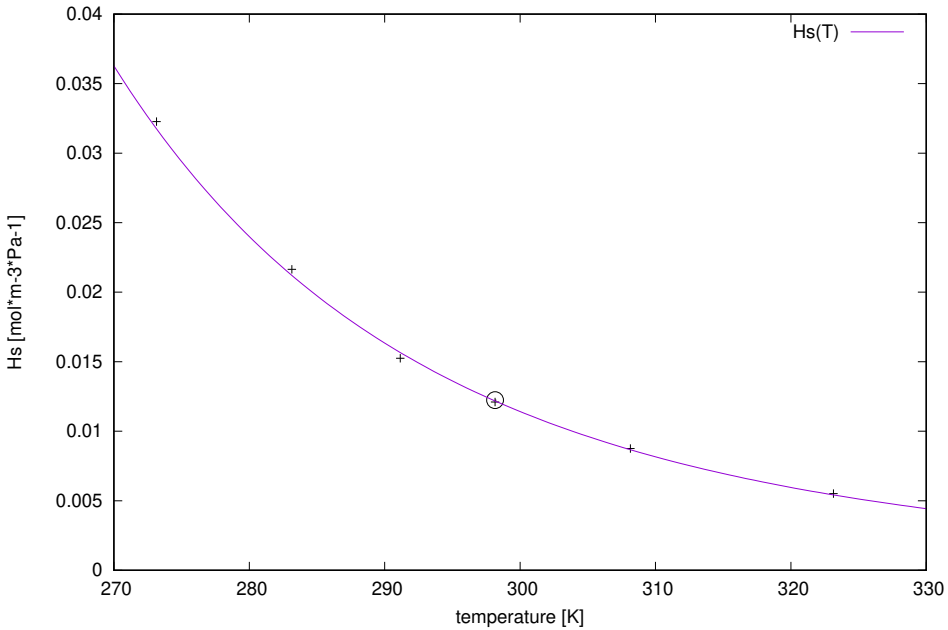

ref = 1125; chem = CCl<sub>2</sub>O; casrn = 75-44-5; r2 = 1.00000

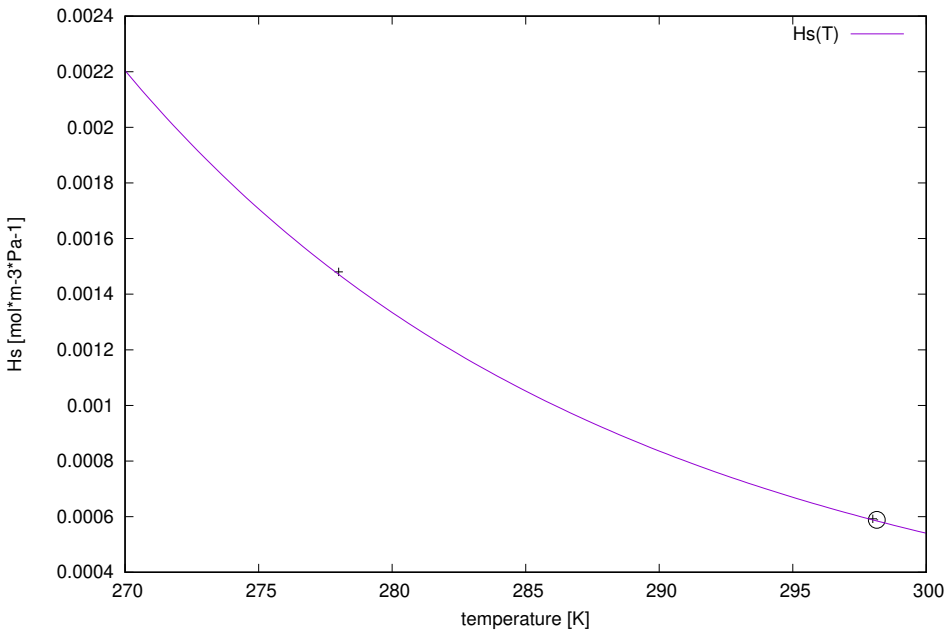

ref = 1138; chem = nitrogen monoxide; casrn = 10102-43-9; r2 = 1.00000

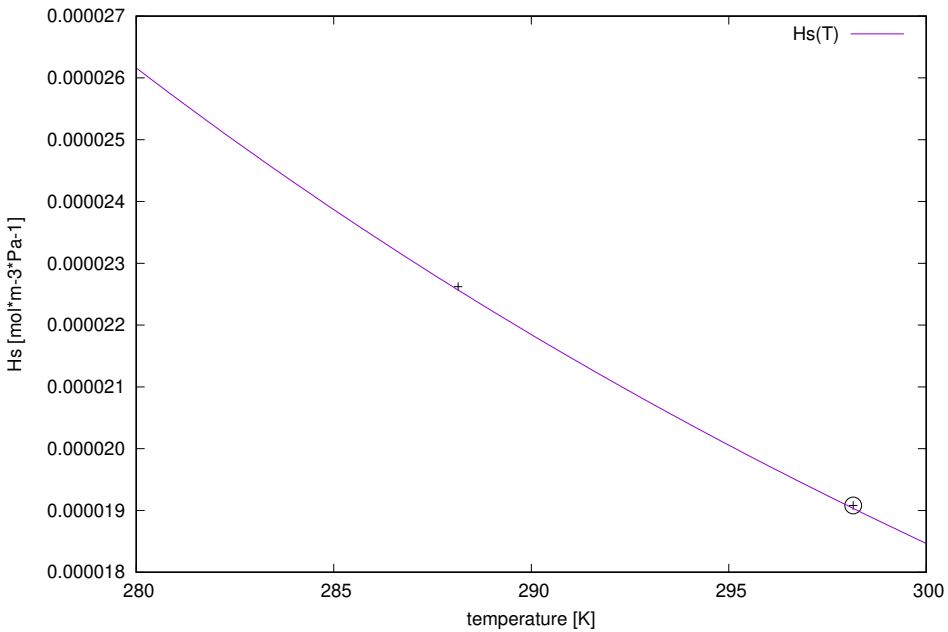

ref = 1138; chem = dinitrogen tetroxide; casrn = 10544-72-6; r2 = 1.00000

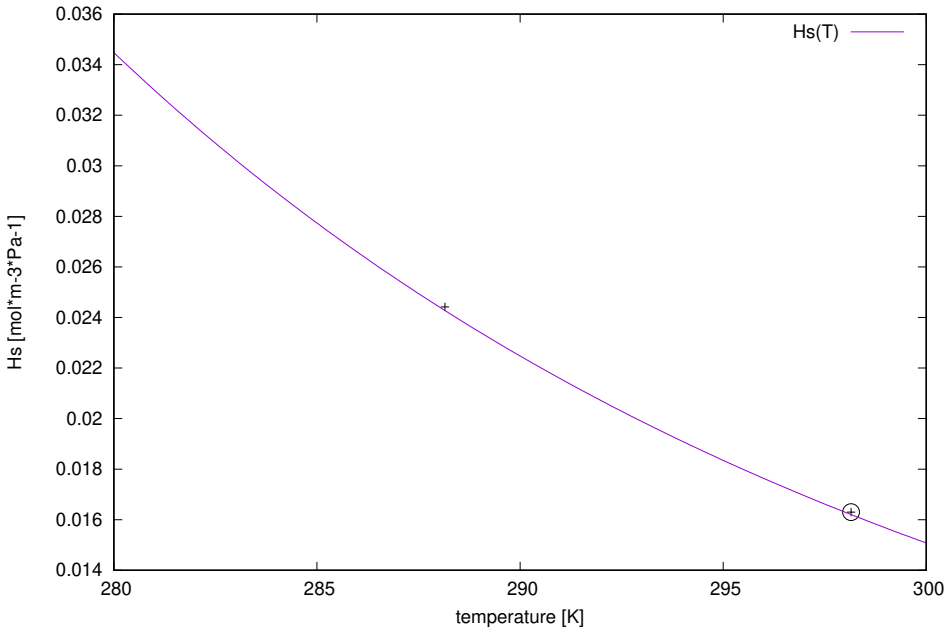

ref = 1138; chem = nitrous acid; casrn = 7782-77-6; r2 = 1.00000

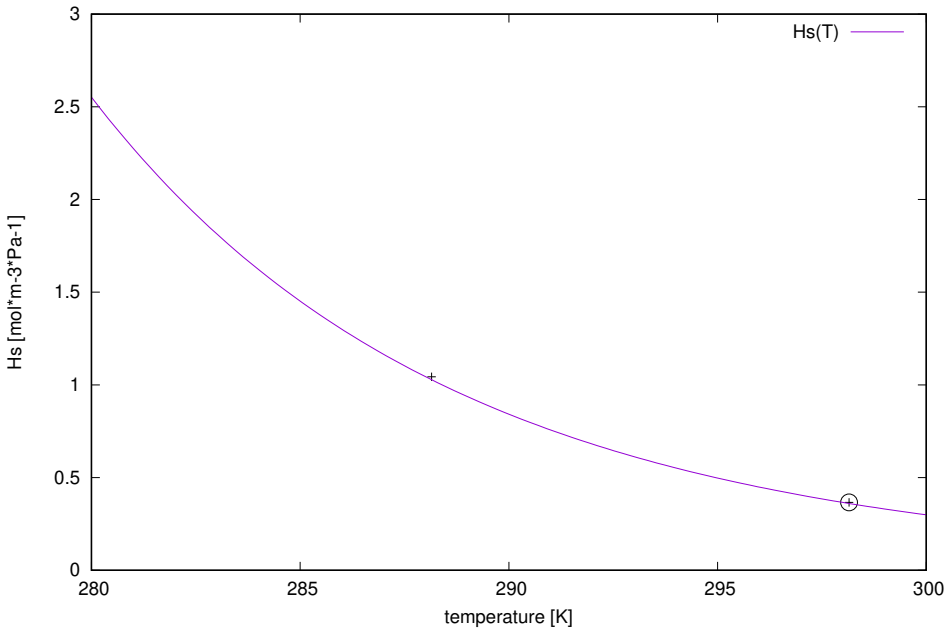

ref = 1146; chem = hexachlorobenzene; casrn = 118-74-1; r2 = 0.97946

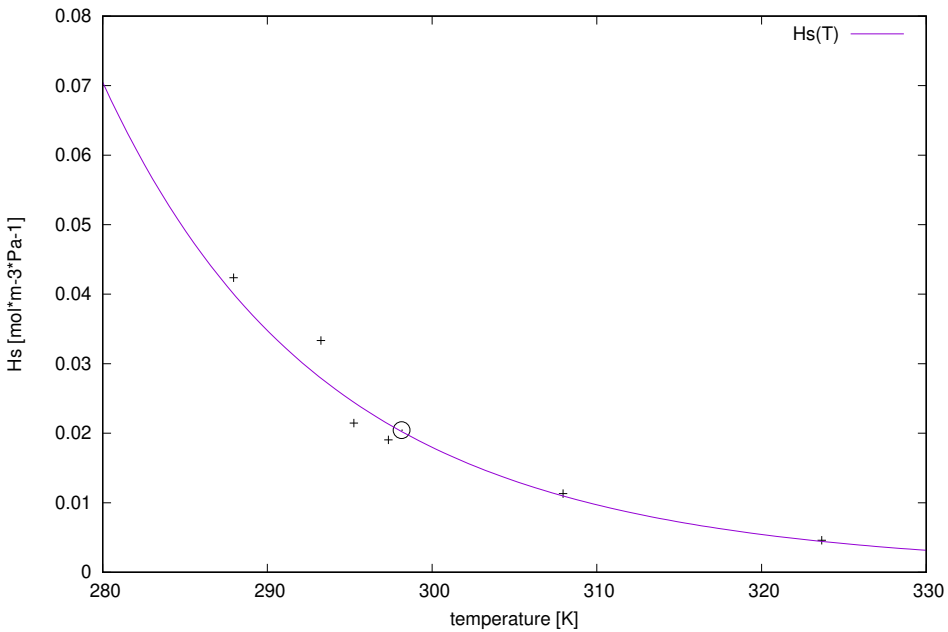

ref = 1146; chem = benzo[ghi]perylene; casrn = 191-24-2; r2 = 0.99285

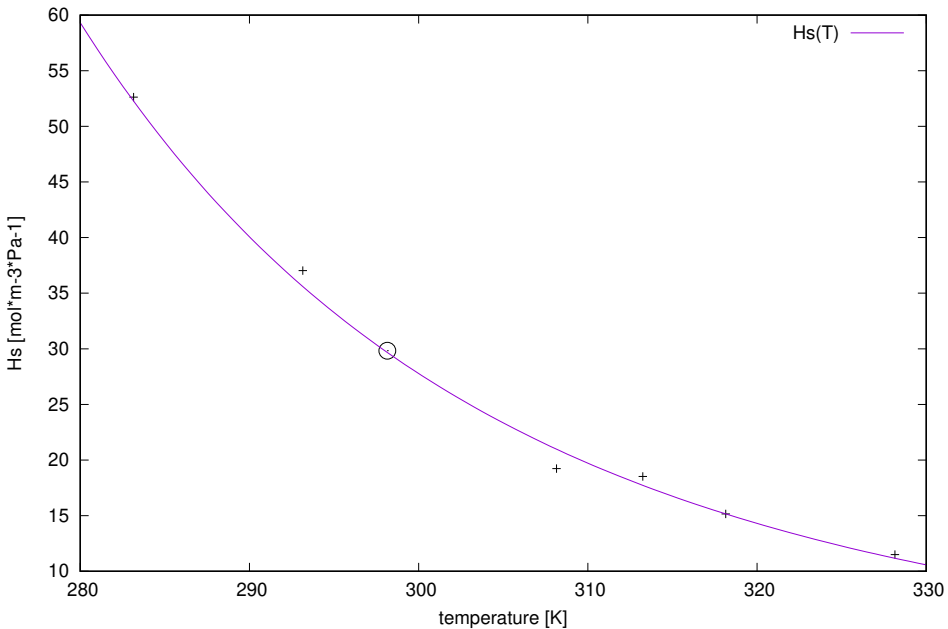



ref = 1146; chem = indeno[1,2,3-cd]pyrene; casrn = 193-39-5; r2 = 0.99519

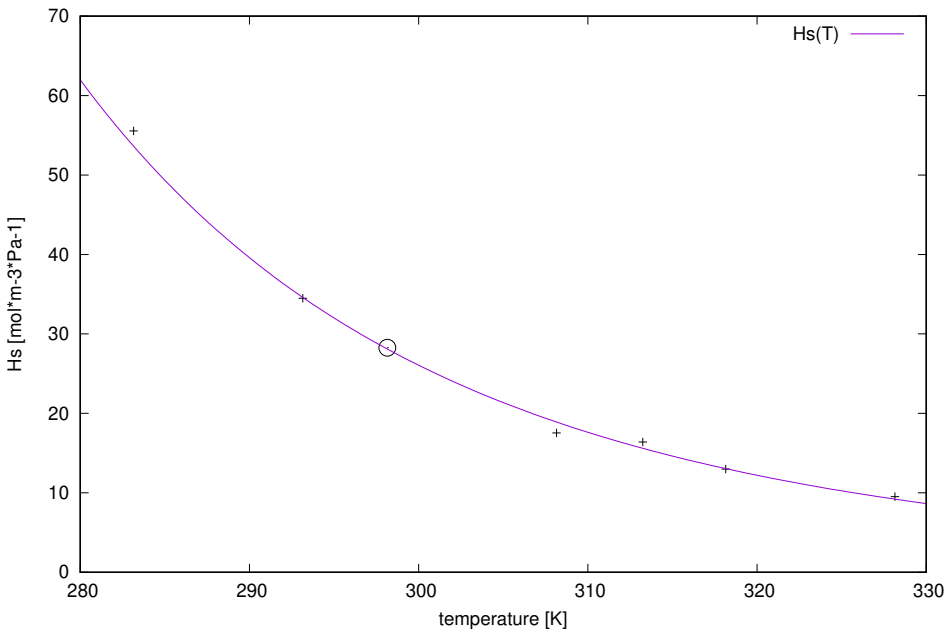

ref = 1146; chem = benzo[b]fluoranthene; casrn = 205-99-2; r2 = 0.99828

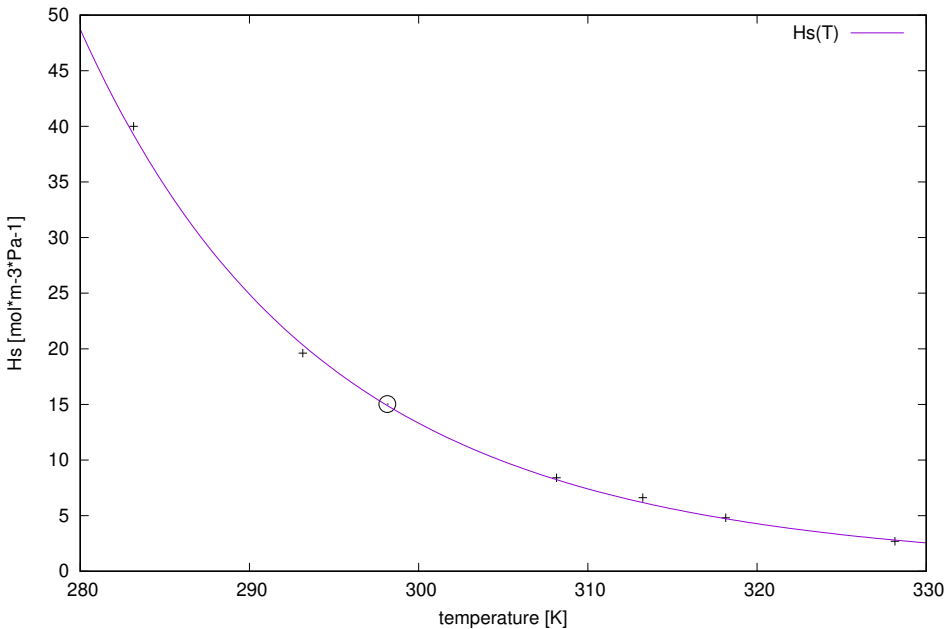

ref = 1146; chem = fluoranthene; casrn = 206-44-0; r2 = 0.96756

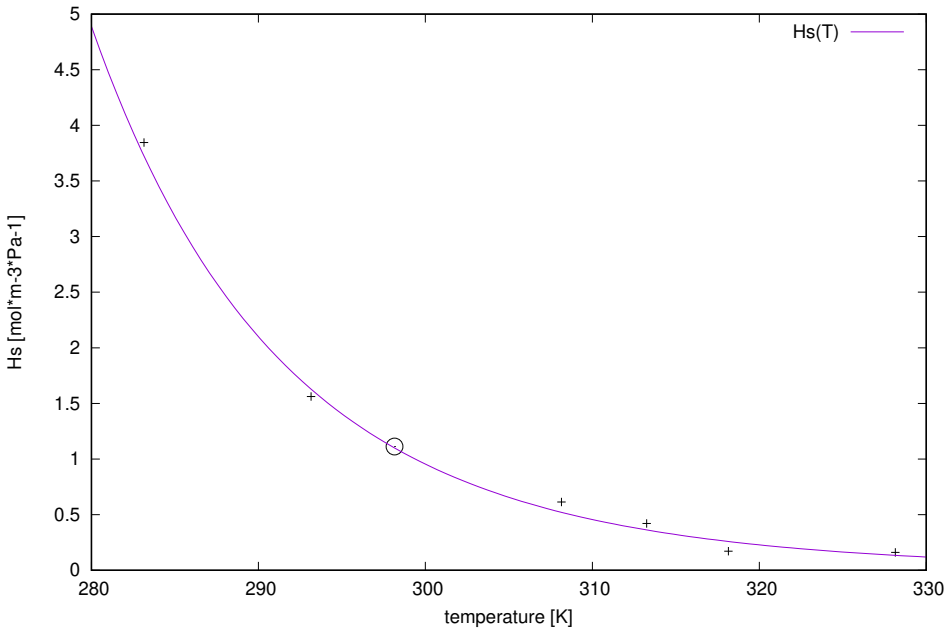

ref = 1146; chem = benzo[k]fluoranthene; casrn = 207-08-9; r2 = 0.99445

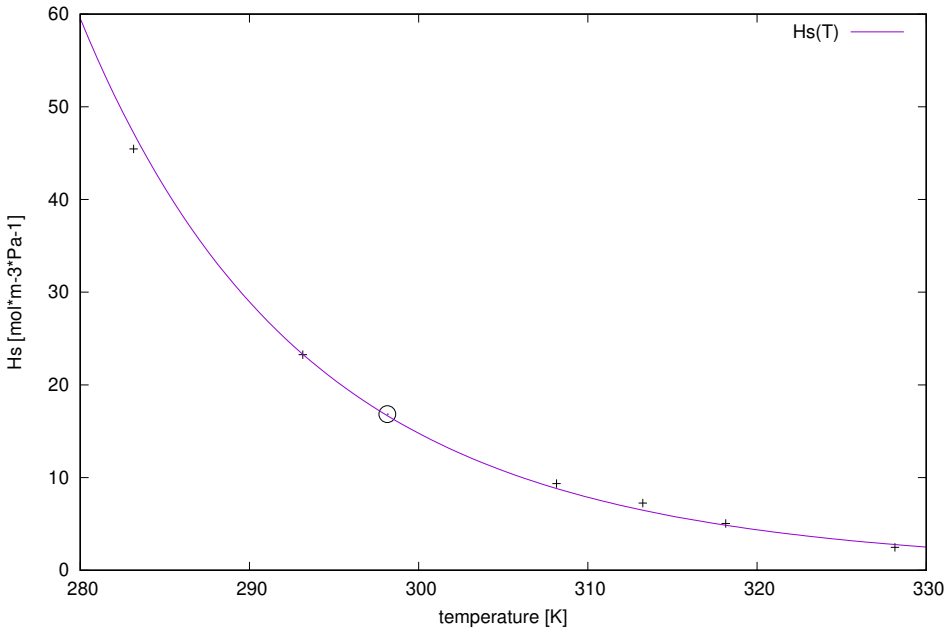

ref = 1146; chem = 2,5-dichlorobiphenyl; casrn = 34883-39-1; r2 = 0.99903

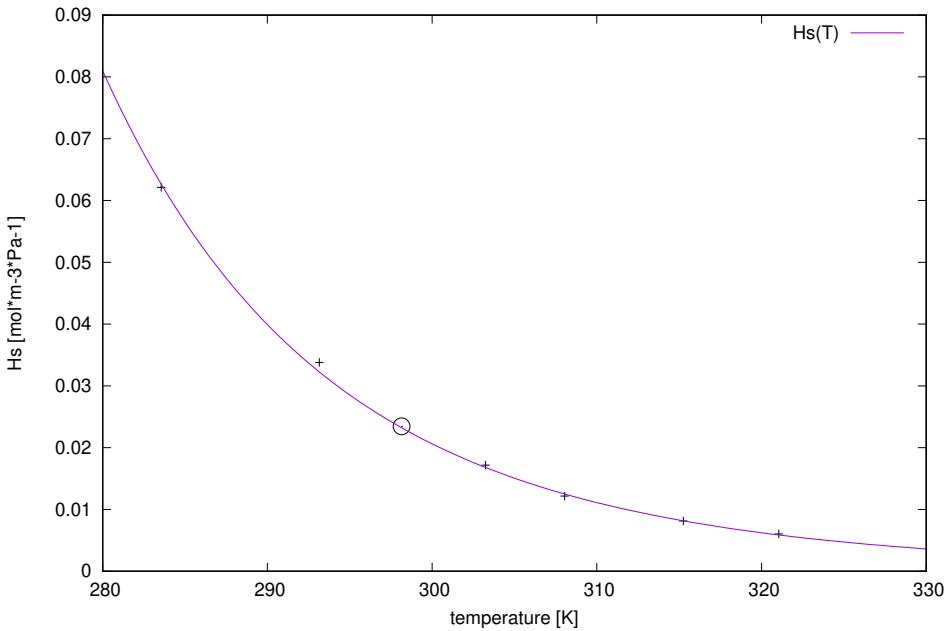

ref = 1146; chem = 2,2',5,5'-tetrachlorobiphenyl; casrn = 35693-99-3; r2 = 0.98877

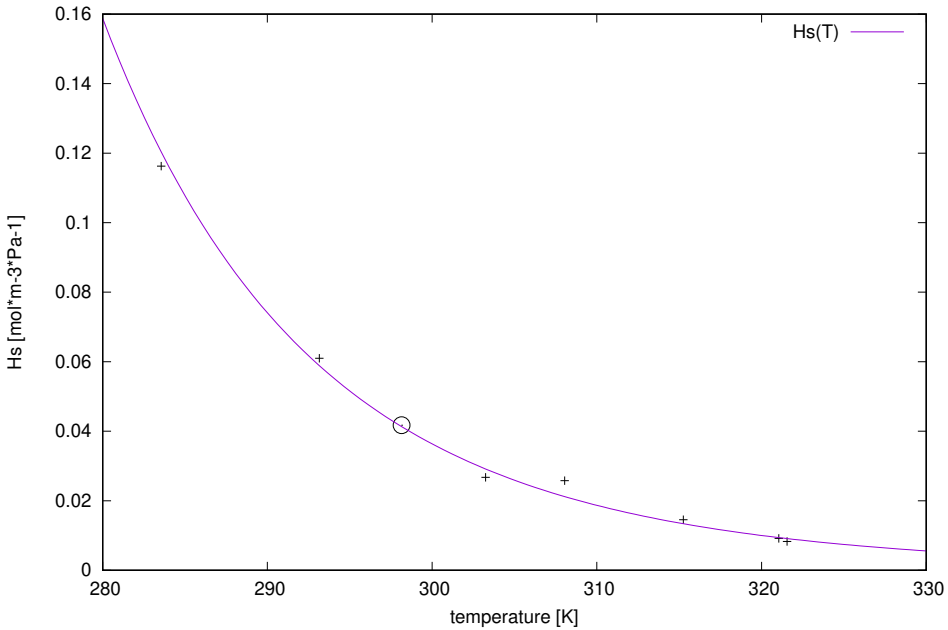

ref = 1146; chem = benzo[a]pyrene; casrn = 50-32-8; r2 = 0.98004

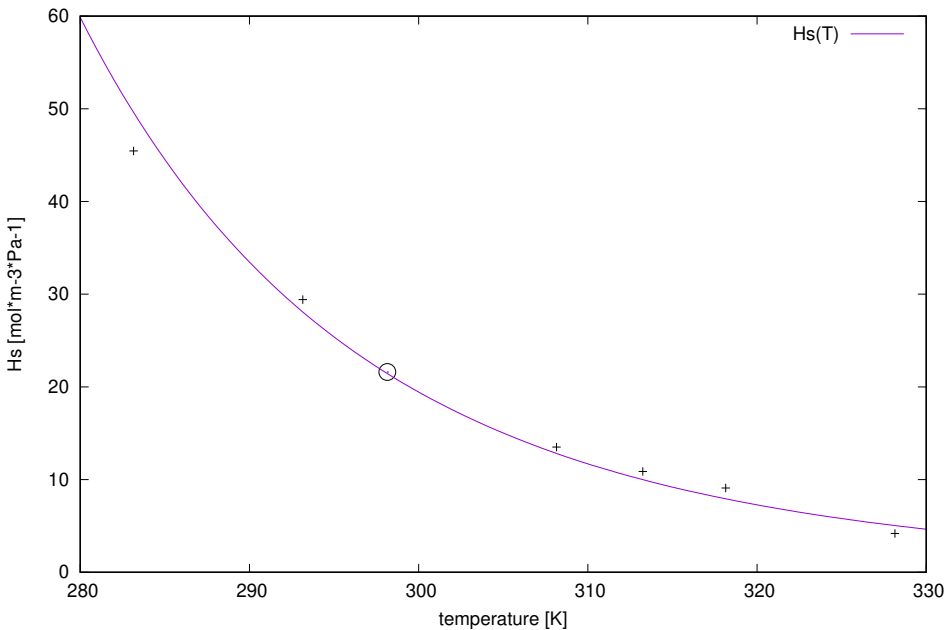

ref = 1146; chem = pentachlorobenzene; casrn = 608-93-5; r2 = 0.99118

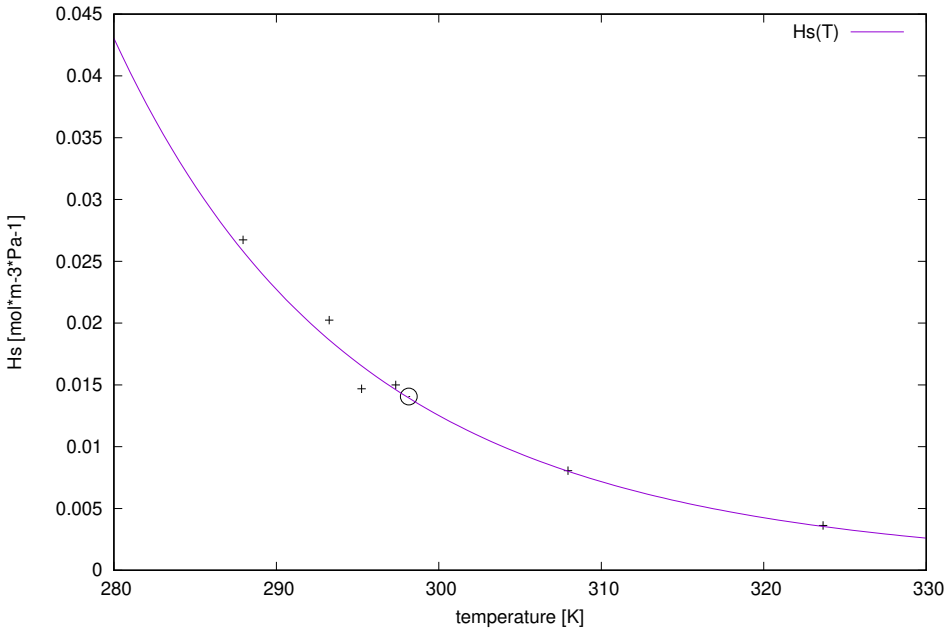



ref = 1146; chem = 1,2,3,4-tetrachlorobenzene; casrn = 634-66-2; r2 = 0.98650

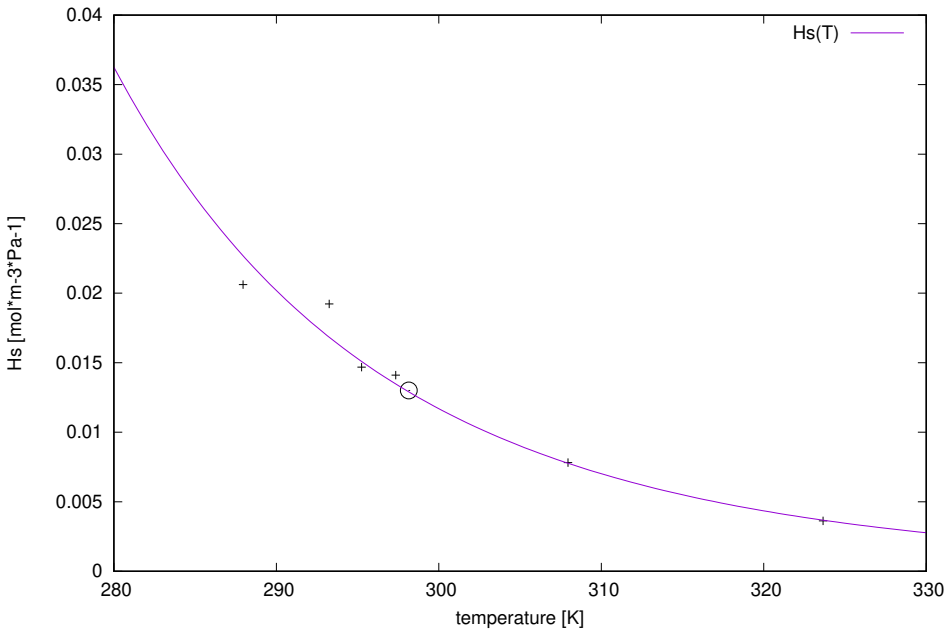

ref = 1146; chem = 2,4,4'-trichlorobiphenyl; casrn = 7012-37-5; r2 = 0.98398

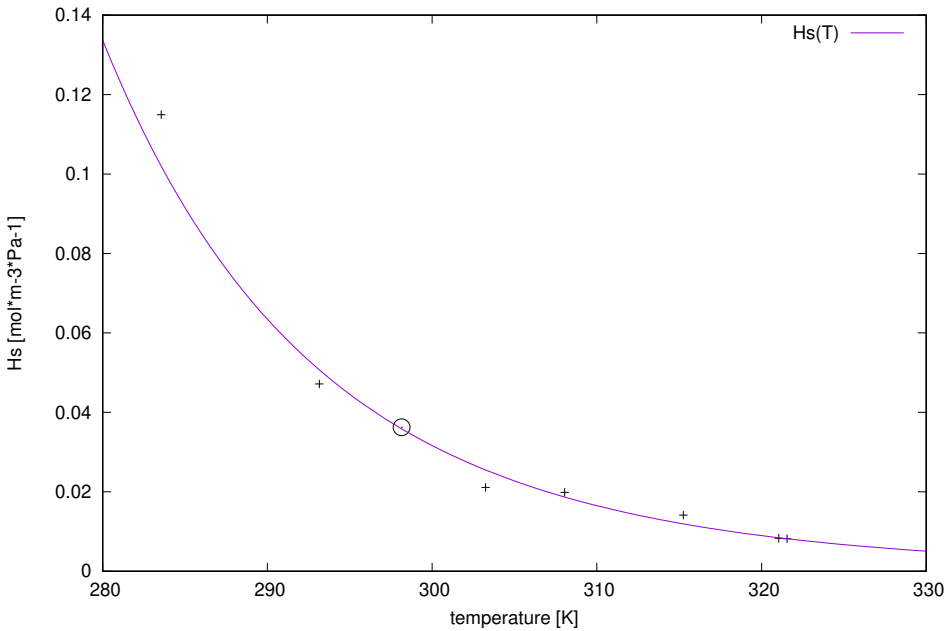

ref = 1148; chem = chlorobenzene; casrn = 108-90-7; r2 = 0.99998

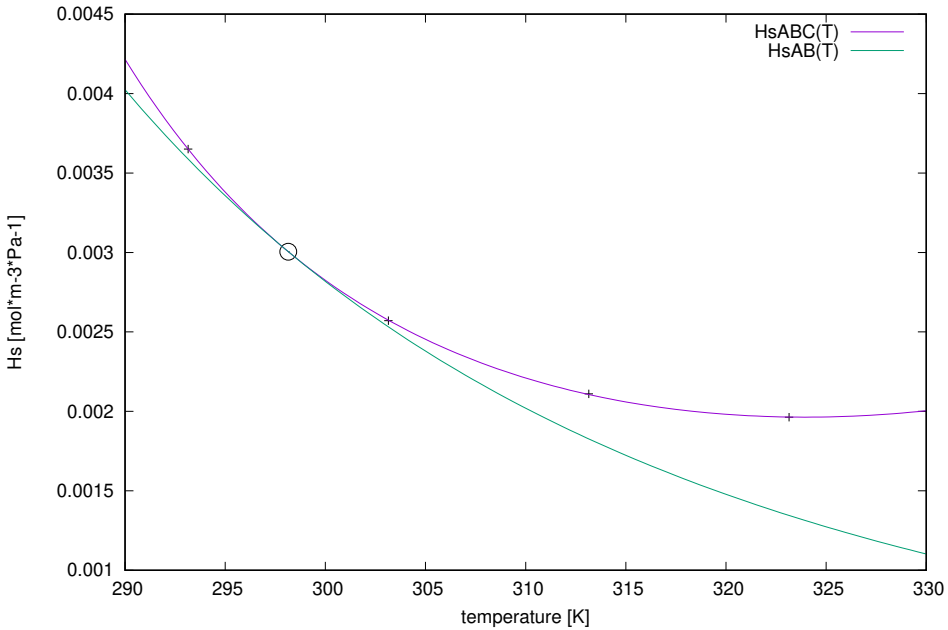

ref = 1148; chem = (E)-1,2-dichloroethene; casrn = 156-60-5; r2 = 0.99954

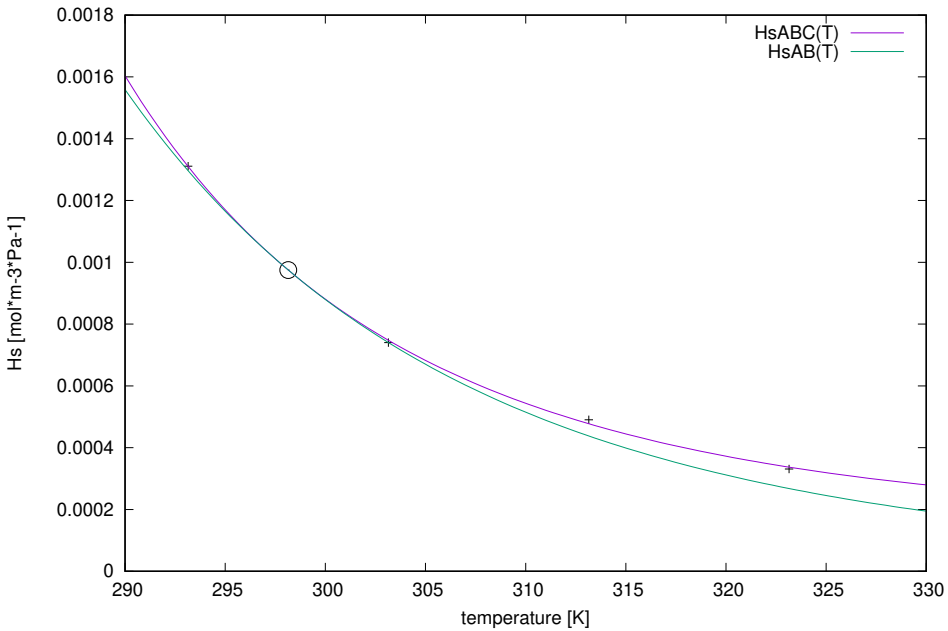

ref = 1148; chem = benzene; casrn = 71-43-2; r2 = 0.99981

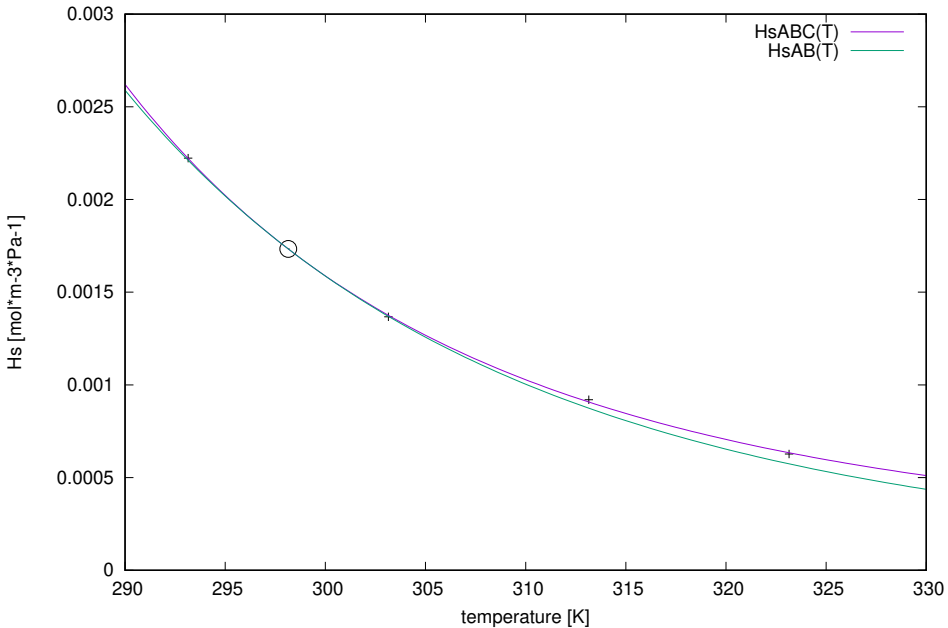

ref = 1148; chem = trichloroethene; casrn = 79-01-6; r2 = 0.99955

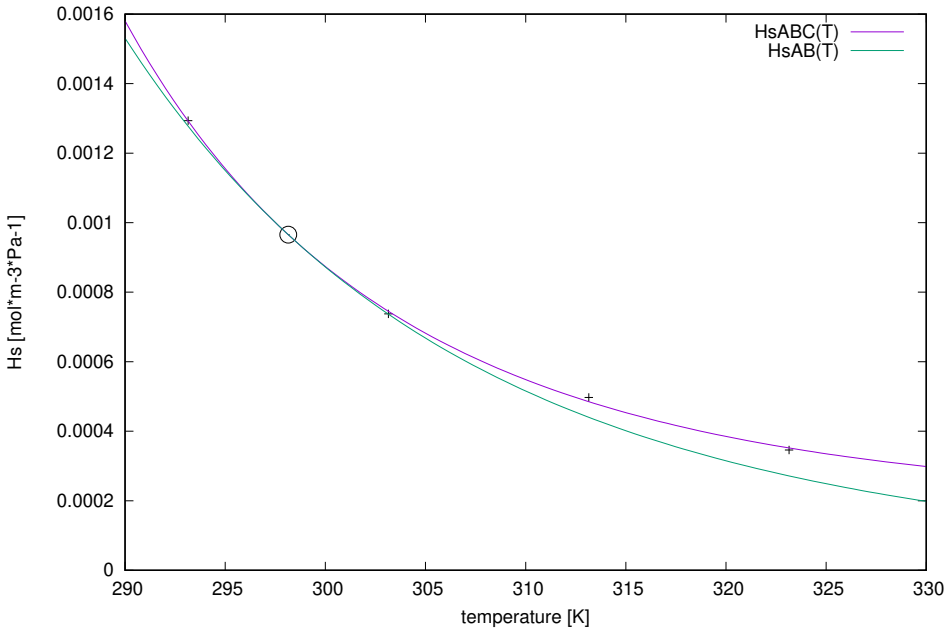

ref = 1149; chem = molecular iodine; casrn = 7553-56-2; r2 = 0.99877

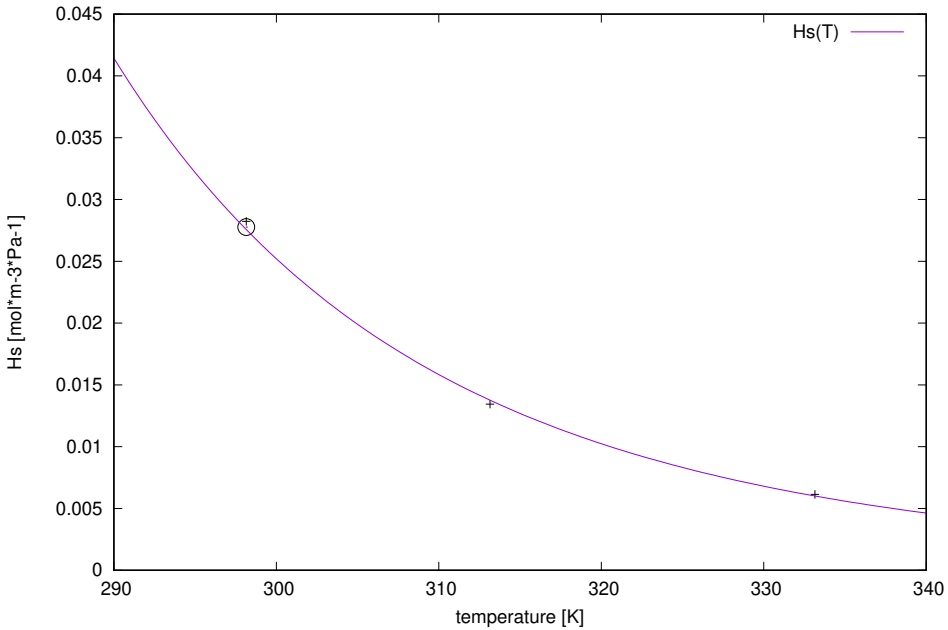

ref = 1156; chem = ethylbenzene; casrn = 100-41-4; r2 = 0.99963

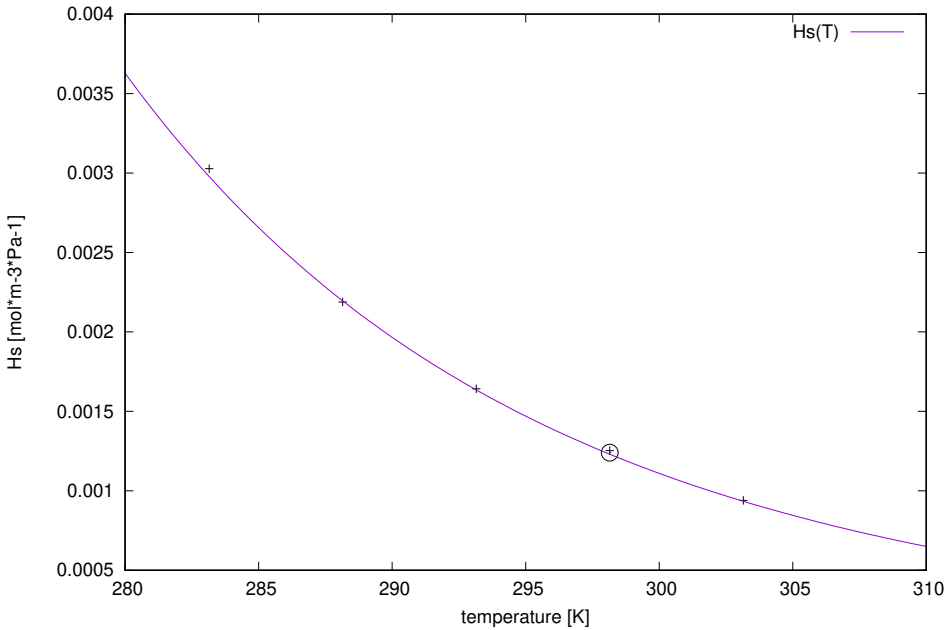



ref = 1156; chem = propylbenzene; casrn = 103-65-1; r2 = 0.99751

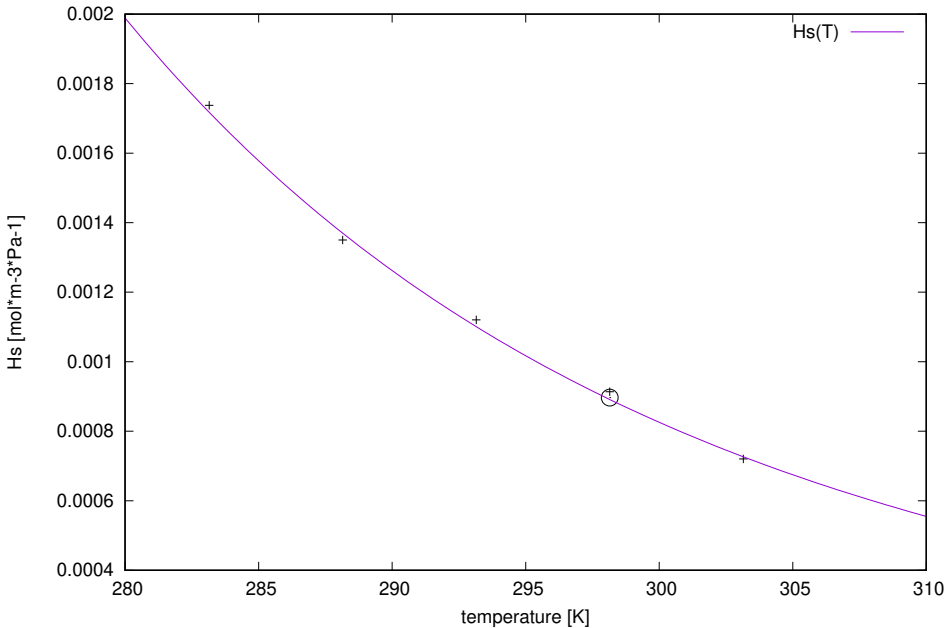

ref = 1156; chem = 1,3-dimethyl-4-hydroxybenzene; casrn = 105-67-9; r2 = 0.55828

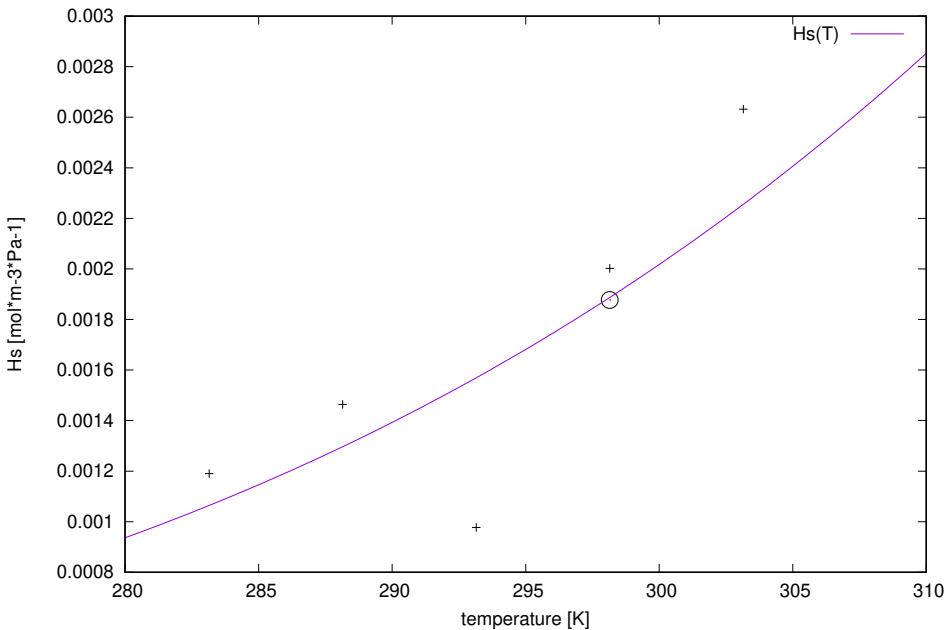

ref = 1156; chem = 1,4-dimethylbenzene; casrn = 106-42-3; r2 = 0.98788

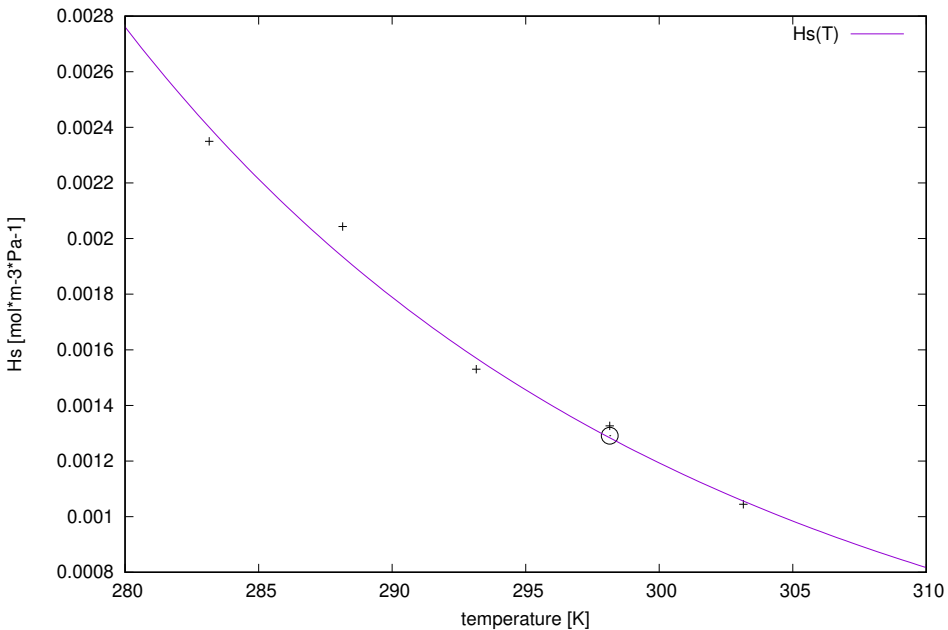

ref = 1156; chem = 1,4-dichlorobenzene; casrn = 106-46-7; r2 = 0.94227

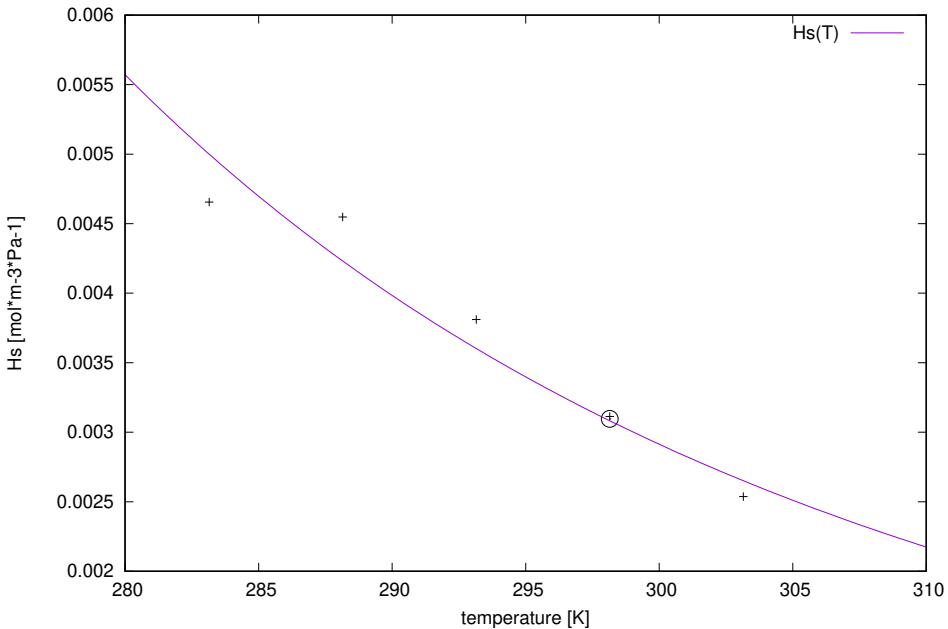

ref = 1156; chem = 1,2-dibromoethane; casrn = 106-93-4; r2 = 0.92036

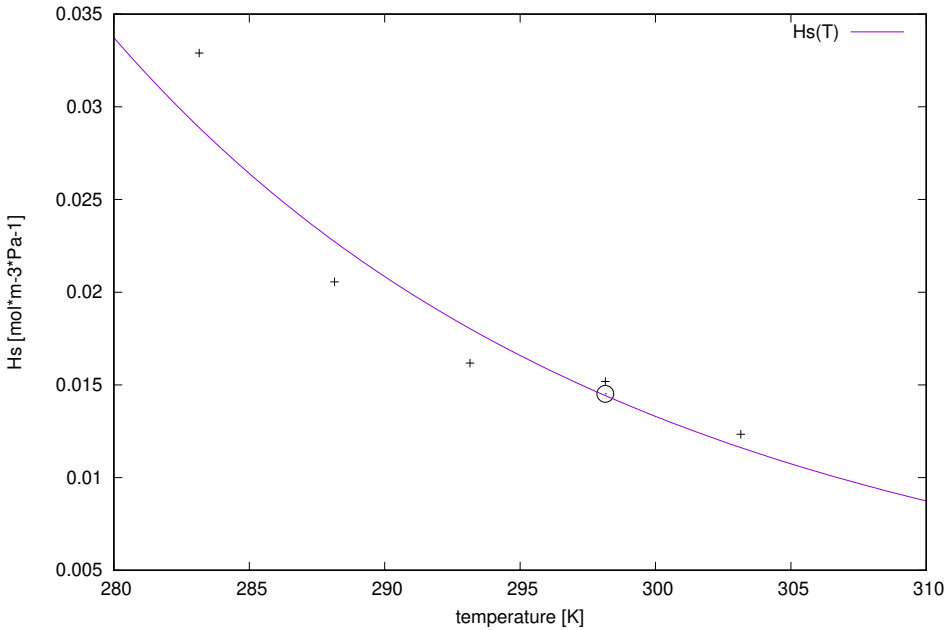

ref = 1156; chem = 1,2-dichloroethane; casrn = 107-06-2; r2 = 0.87501

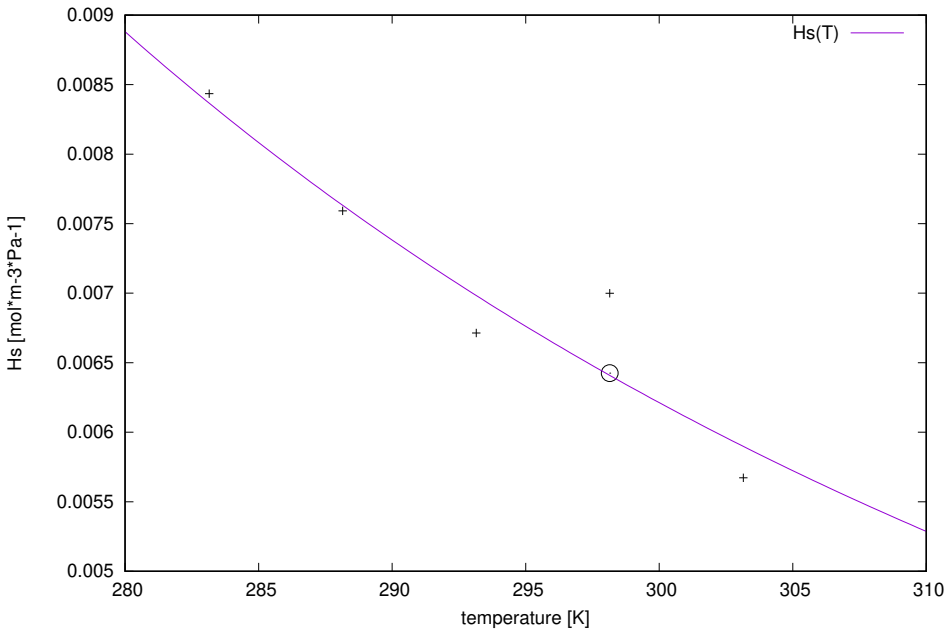

ref = 1156; chem = 2-methylpentane; casrn = 107-83-5; r2 = 0.49994

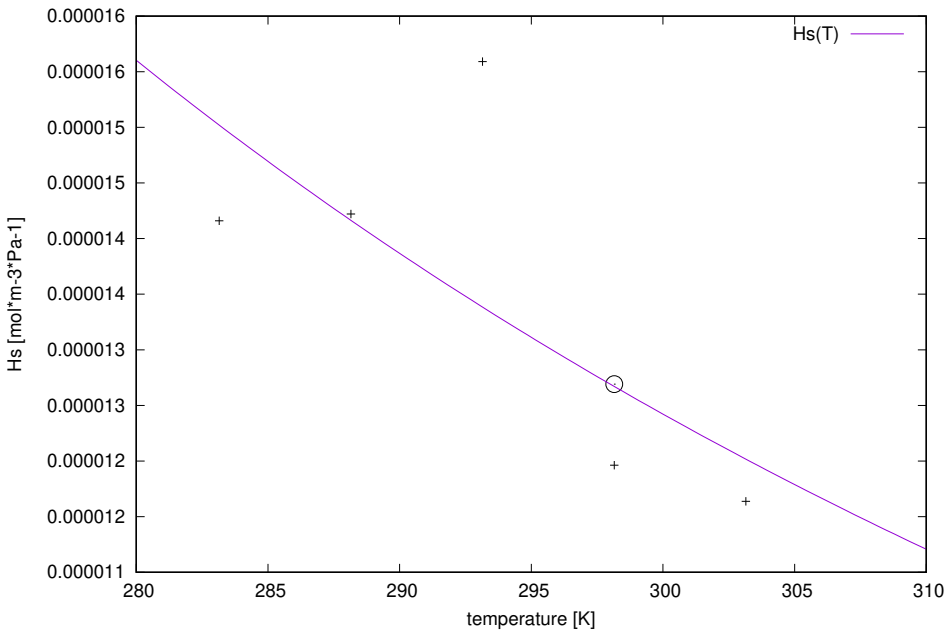

ref = 1156; chem = 4-methyl-2-pentanone; casrn = 108-10-1; r2 = 0.00073

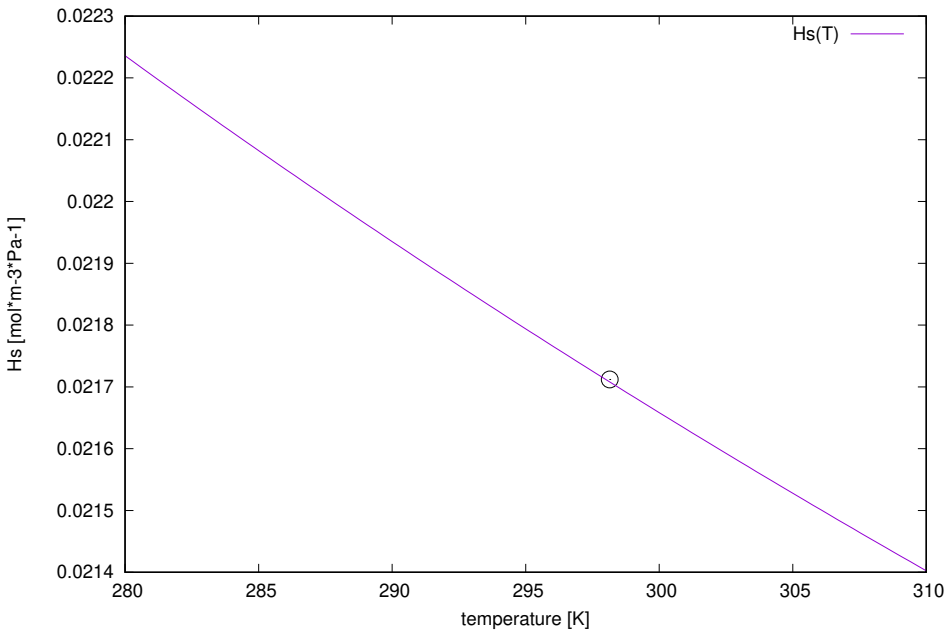



ref = 1156; chem = 1,3-dimethylbenzene; casrn = 108-38-3; r2 = 0.99856

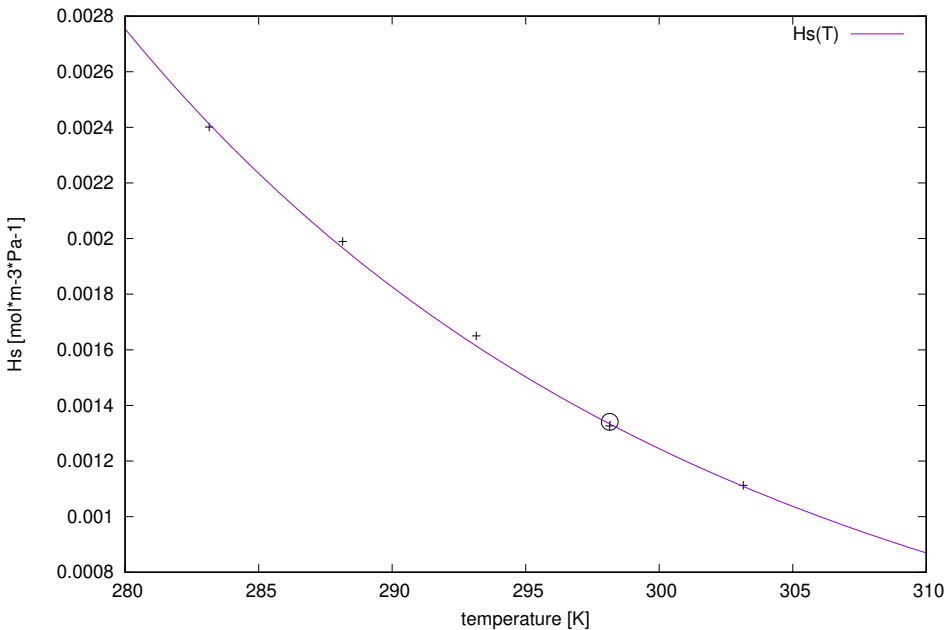

ref = 1156; chem = 1,3,5-trimethylbenzene; casrn = 108-67-8; r2 = 0.96176

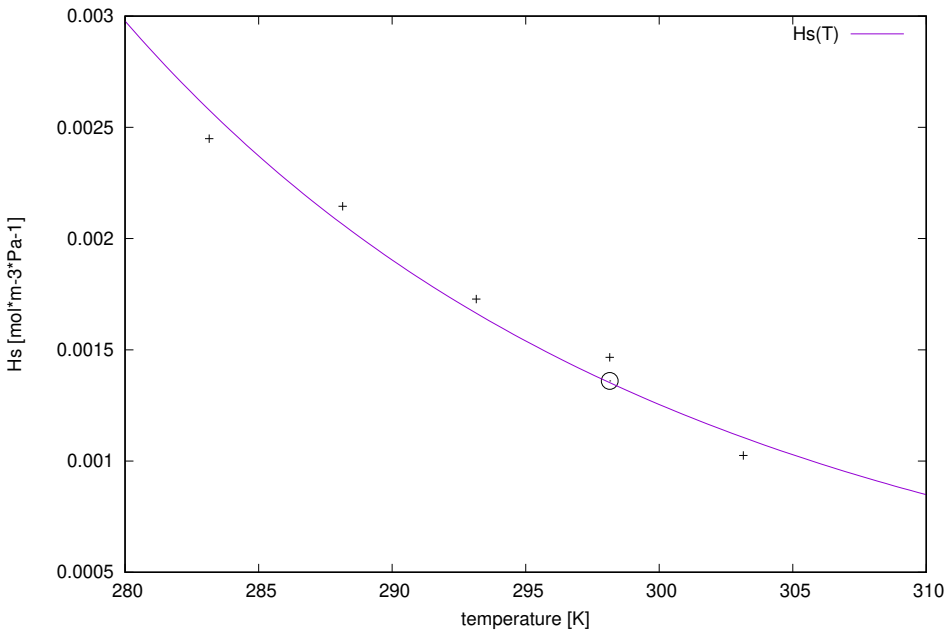

ref = 1156; chem = methylbenzene; casrn = 108-88-3; r2 = 0.98442

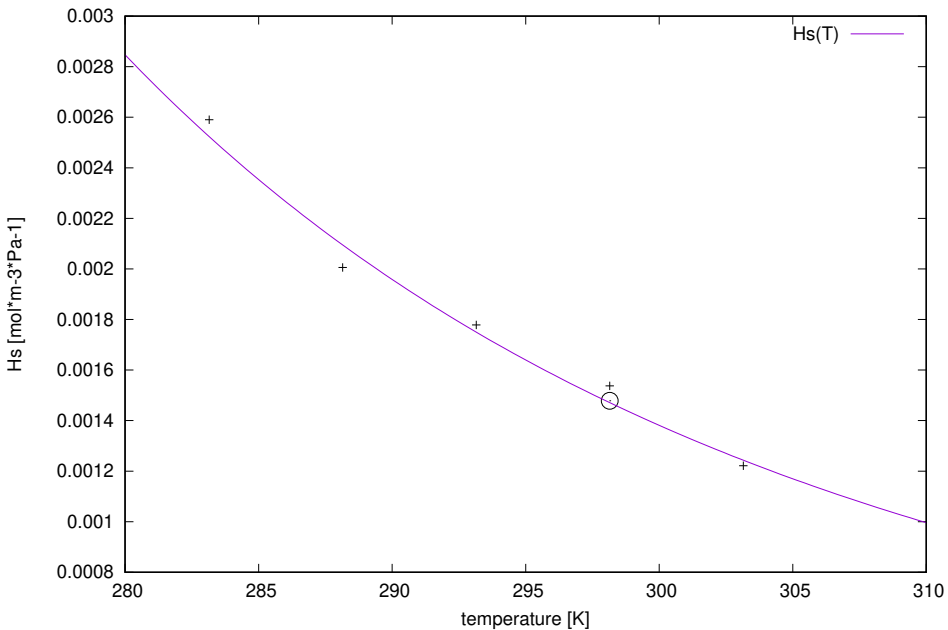

ref = 1156; chem = chlorobenzene; casrn = 108-90-7; r2 = 0.96497

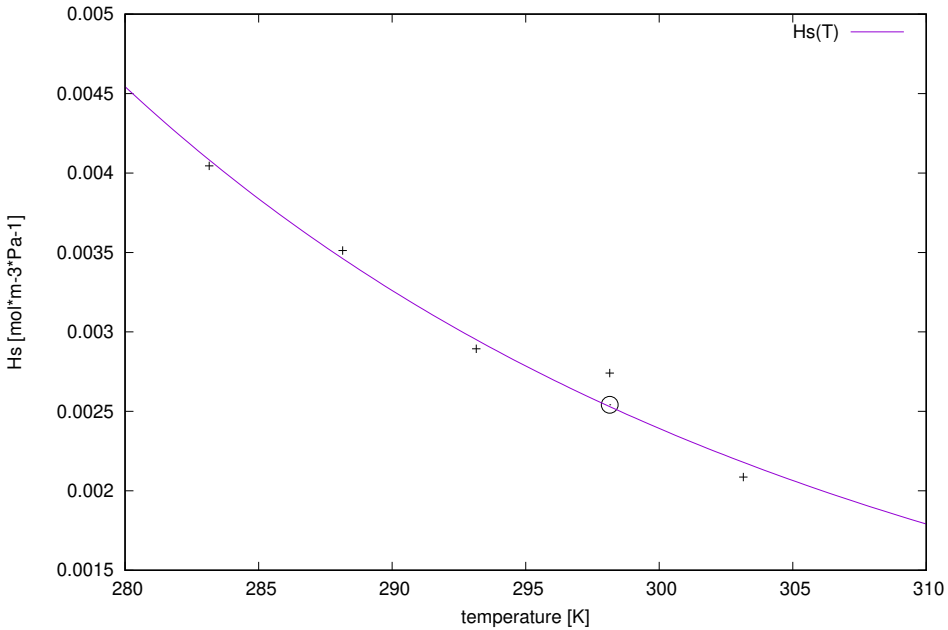

ref = 1156; chem = 2-methoxyethanol; casrn = 109-86-4; r2 = 0.01620

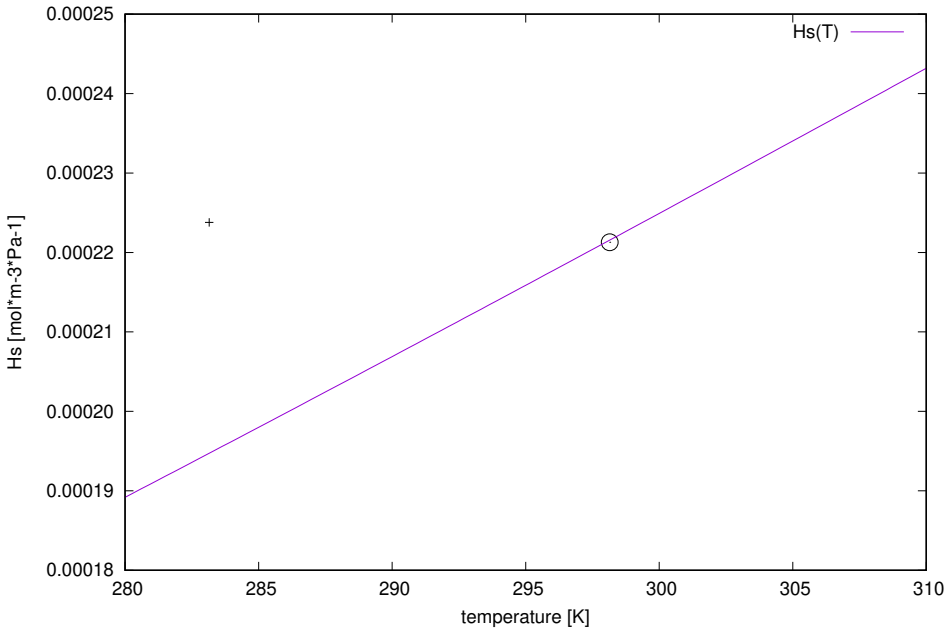

ref = 1156; chem = hexane; casrn = 110-54-3; r2 = 0.91735

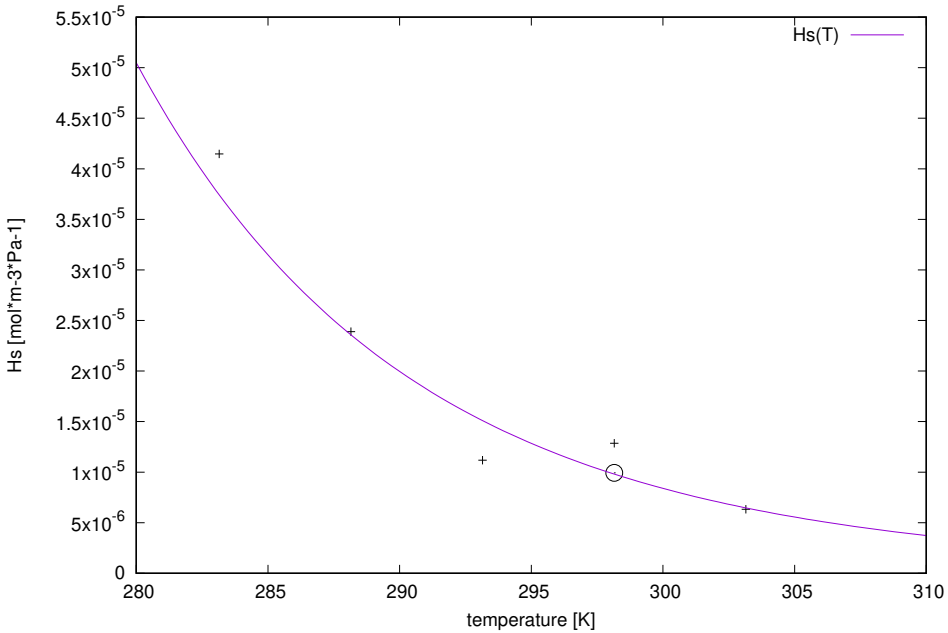

ref = 1156; chem = cyclohexane; casrn = 110-82-7; r2 = 0.98181

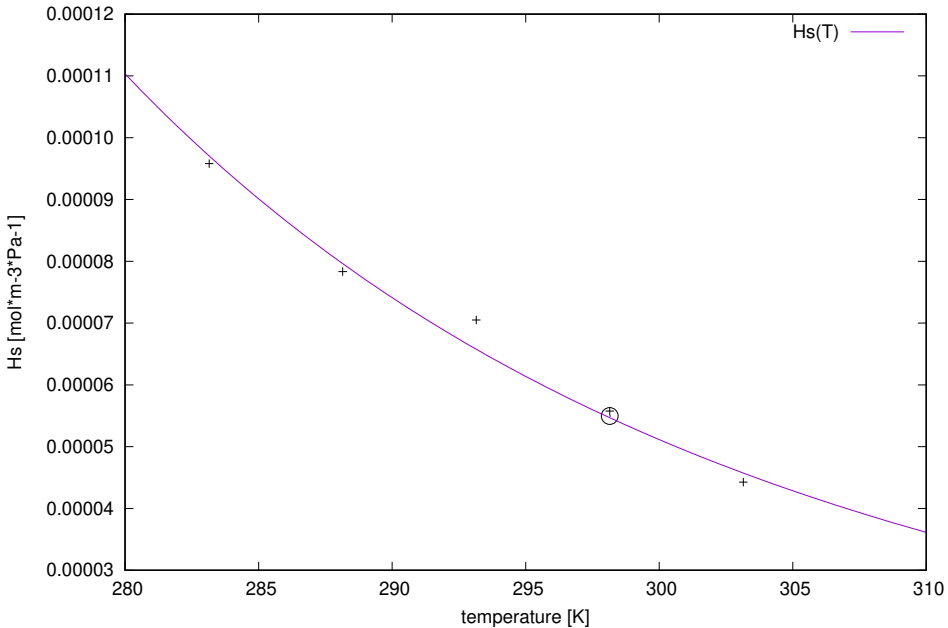

ref = 1156; chem = nonane; casrn = 111-84-2; r2 = 0.01343

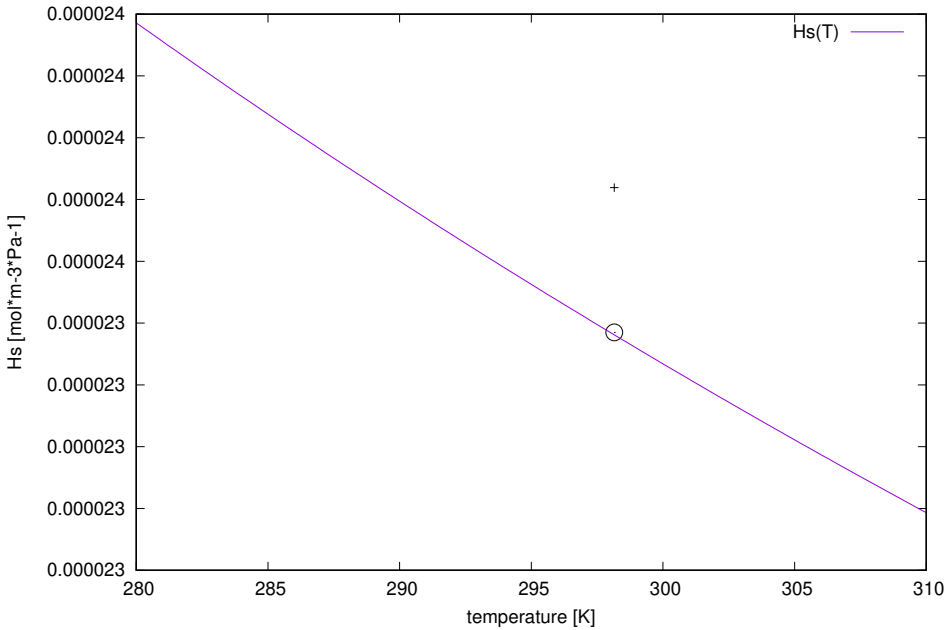



ref = 1156; chem = tetralin; casrn = 119-64-2; r2 = 0.99582

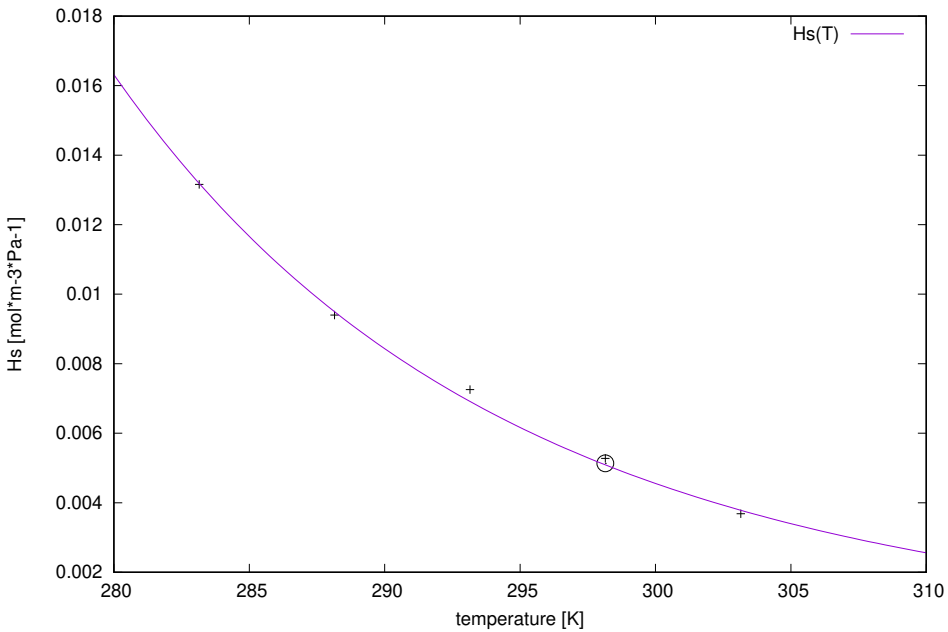

ref = 1156; chem = 1,2,4-trichlorobenzene; casrn = 120-82-1; r2 = 0.79649

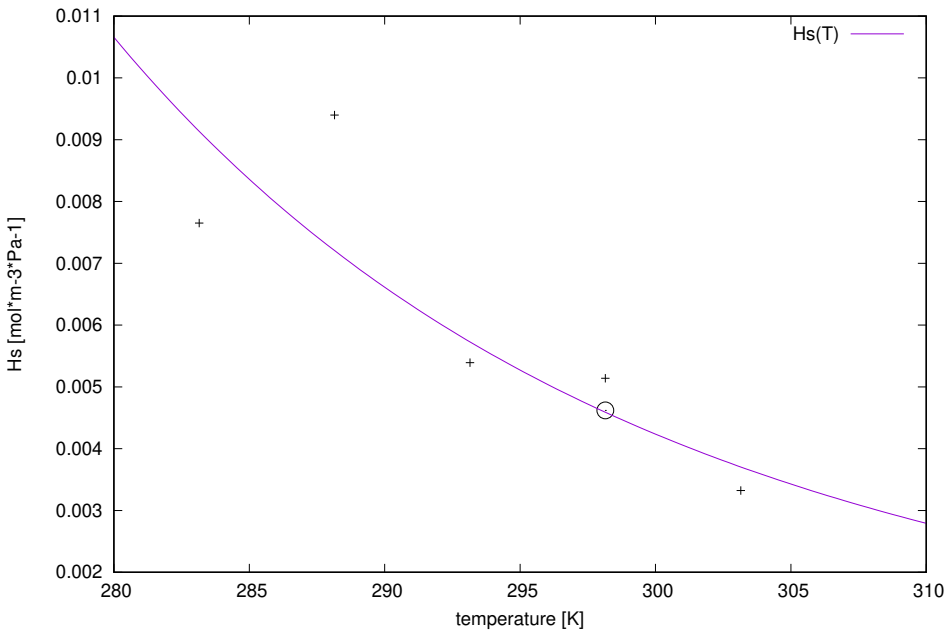

ref = 1156; chem = dibromochloromethane; casrn = 124-48-1; r2 = 0.92747

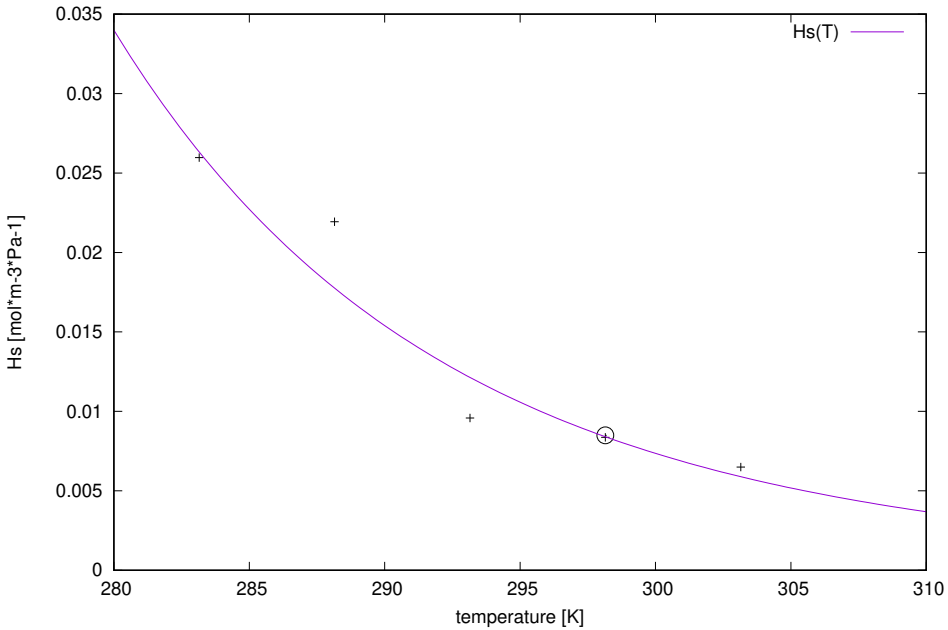

ref = 1156; chem = tetrachloroethene; casrn = 127-18-4; r2 = 0.98901

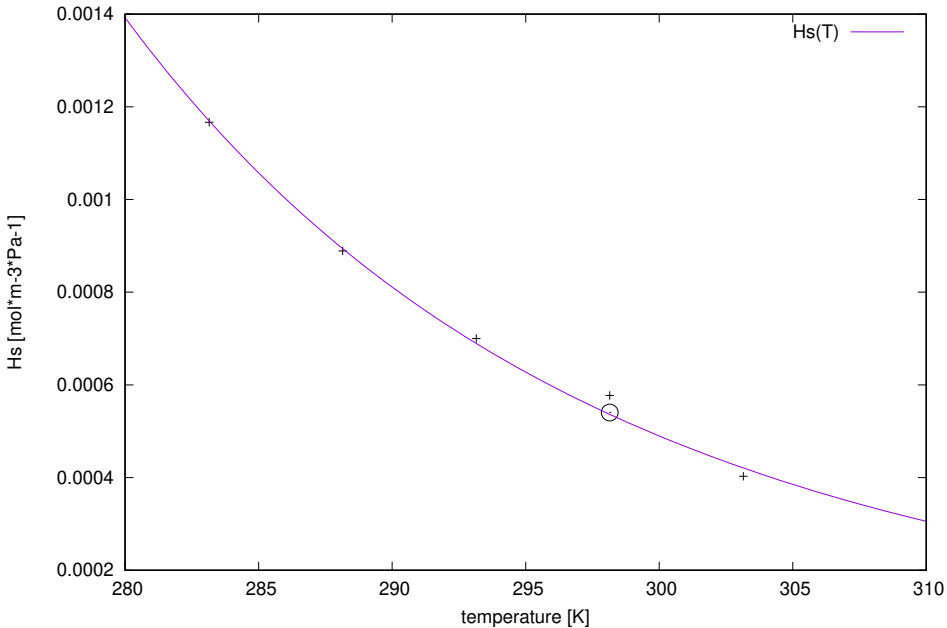

ref = 1156; chem = (Z)-1,2-dichloroethene; casrn = 156-59-2; r2 = 0.97712

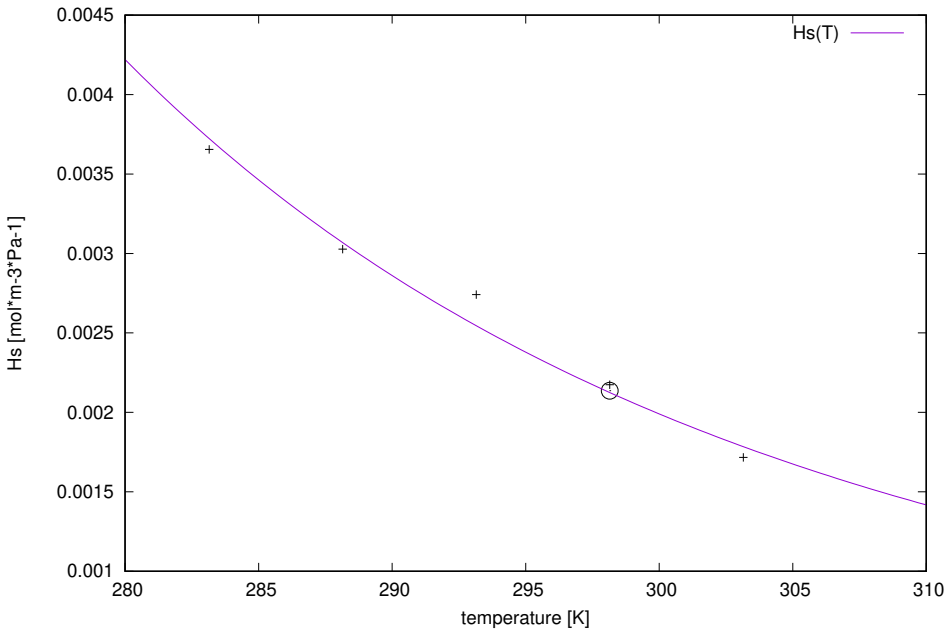

ref = 1156; chem = (E)-1,2-dichloroethene; casrn = 156-60-5; r2 = 0.98652

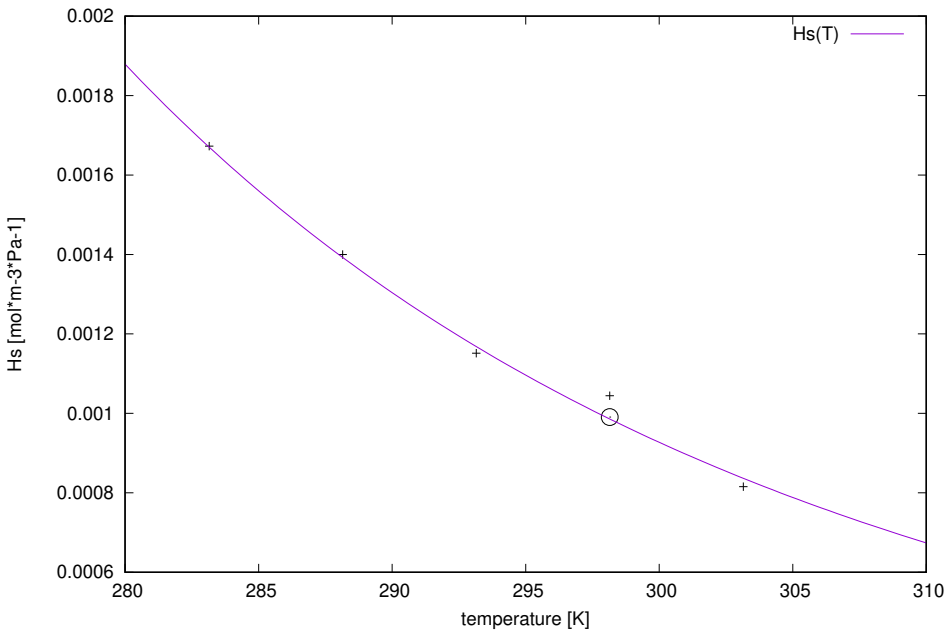

ref = 1156; chem = 1,3-dichlorobenzene; casrn = 541-73-1; r2 = 0.84962

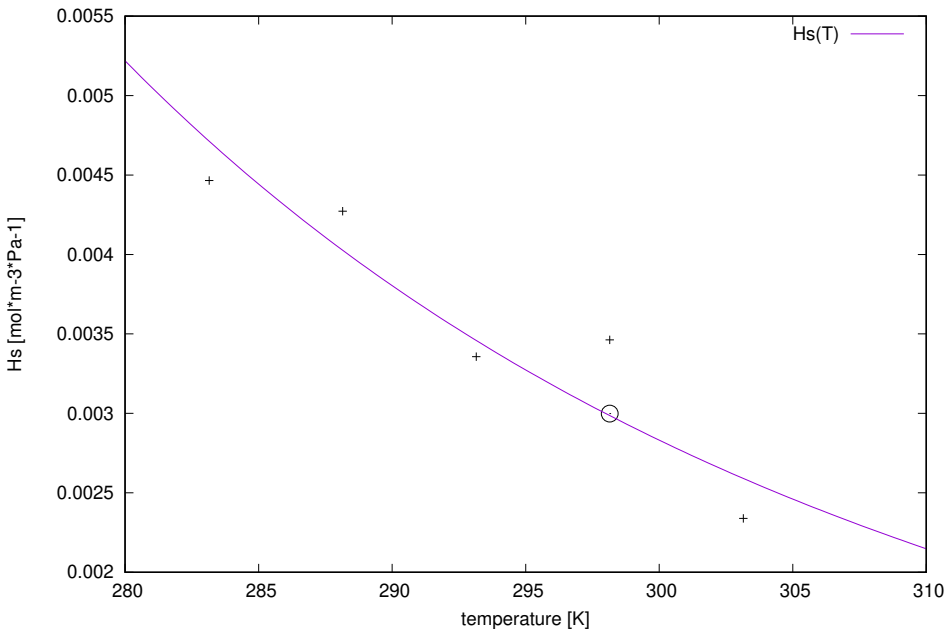

ref = 1156; chem = tetrachloromethane; casrn = 56-23-5; r2 = 0.99759

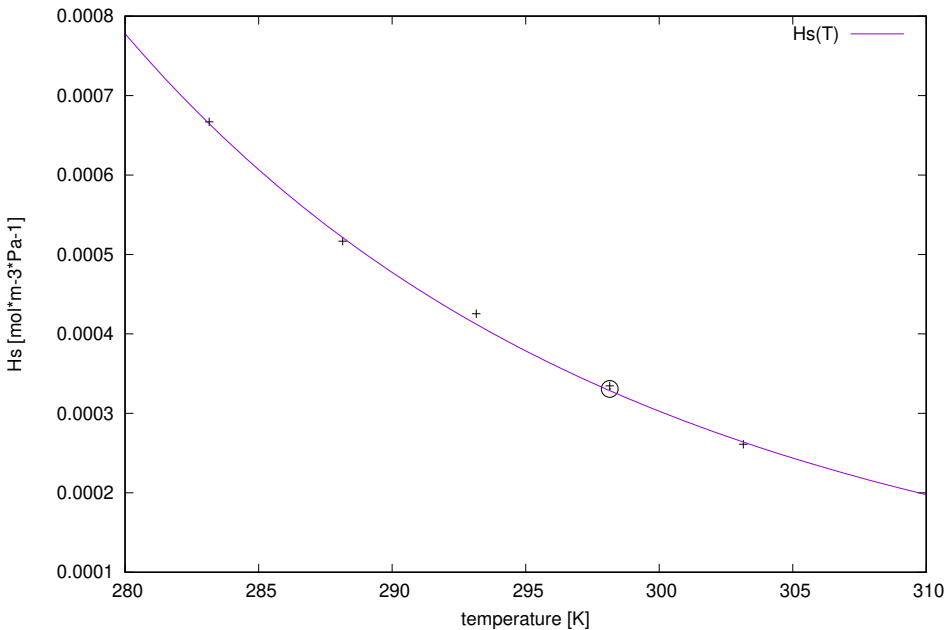



ref = 1156; chem = trichloromethane; casrn = 67-66-3; r2 = 0.99737

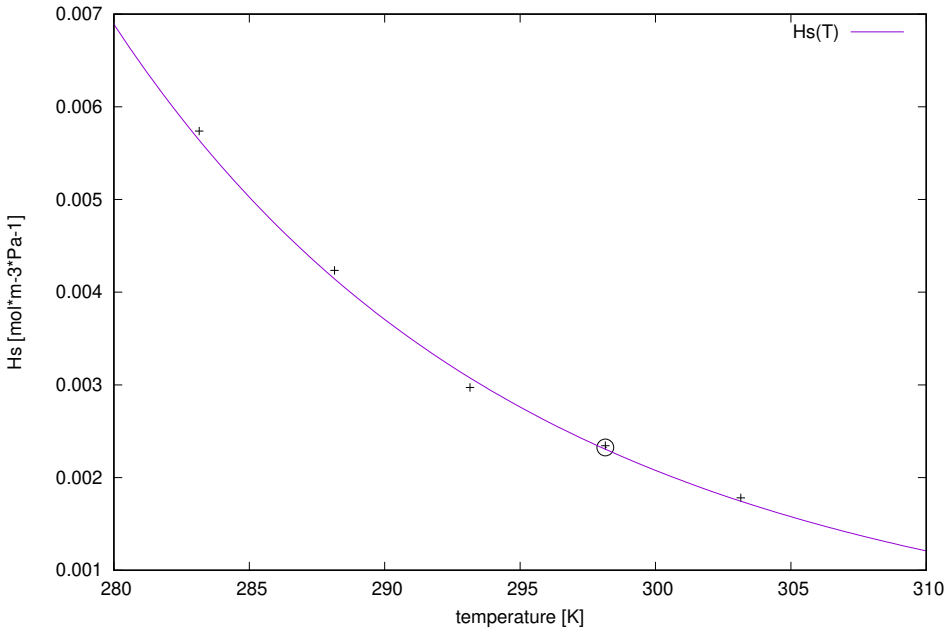

ref = 1156; chem = hexachloroethane; casrn = 67-72-1; r2 = 0.77450

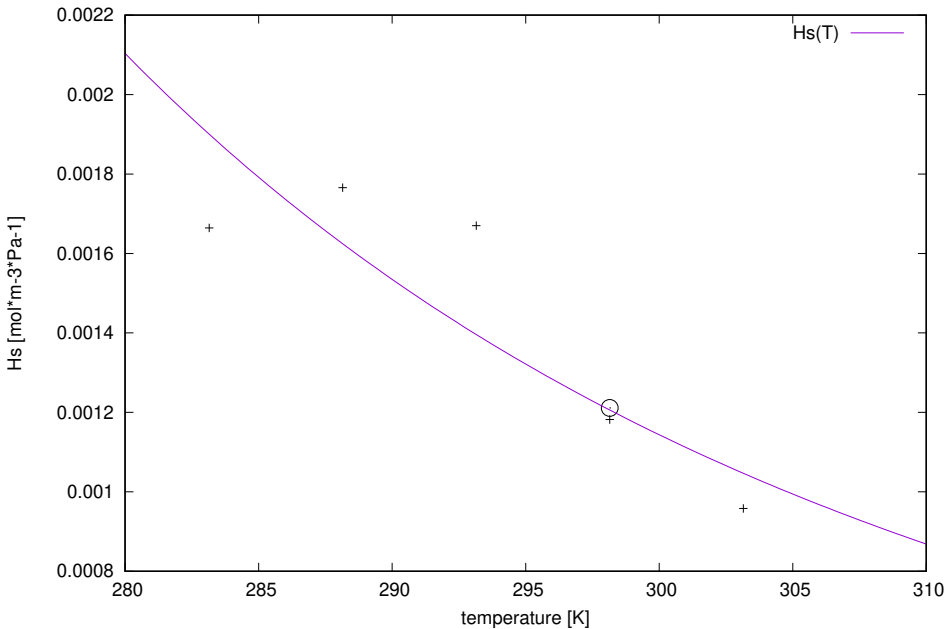

ref = 1156; chem = benzene; casrn = 71-43-2; r2 = 0.96823

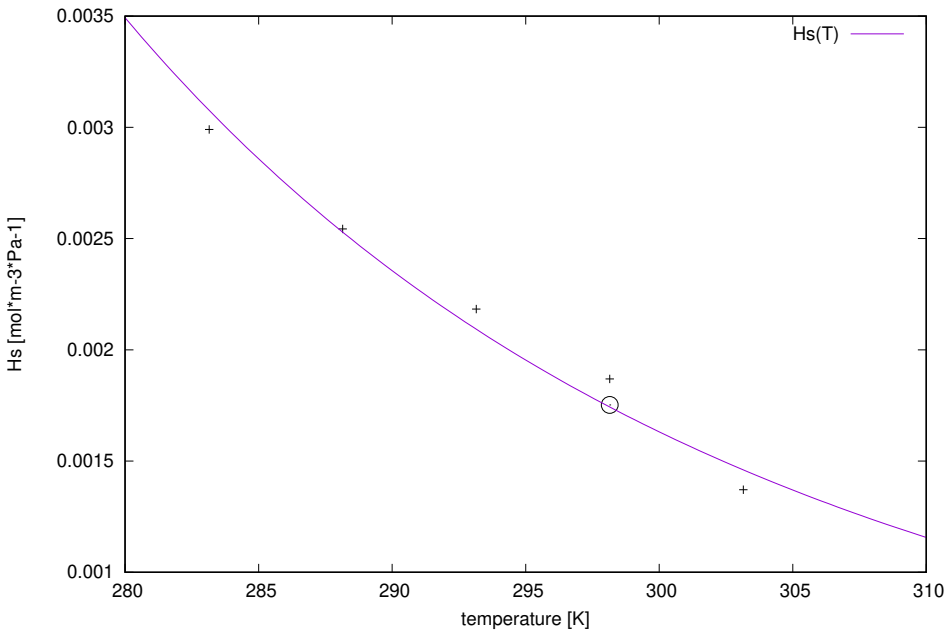

ref = 1156; chem = 1,1,1-trichloroethane; casrn = 71-55-6; r2 = 0.99782

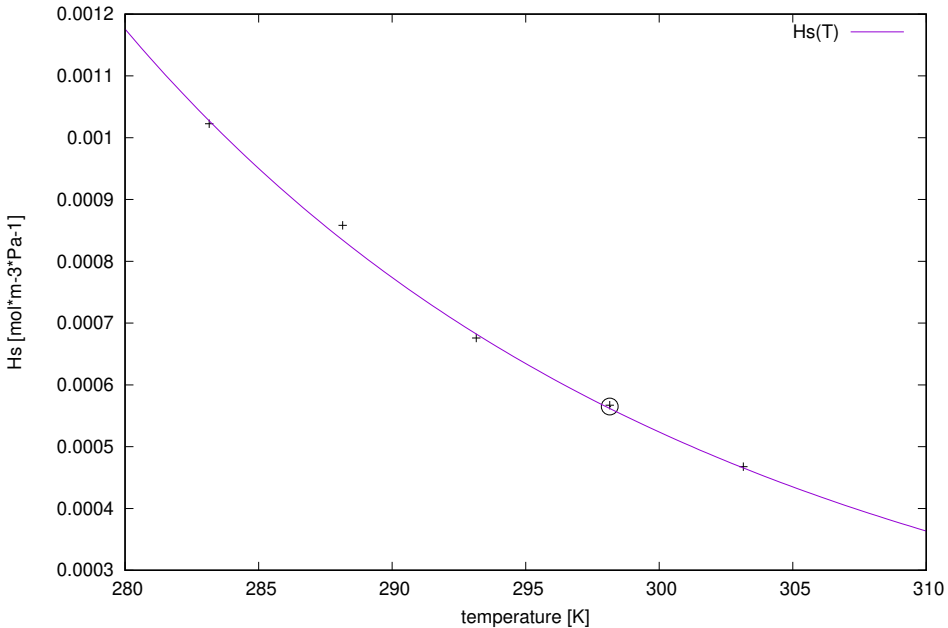

ref = 1156; chem = chloroethane; casrn = 75-00-3; r2 = 0.98184

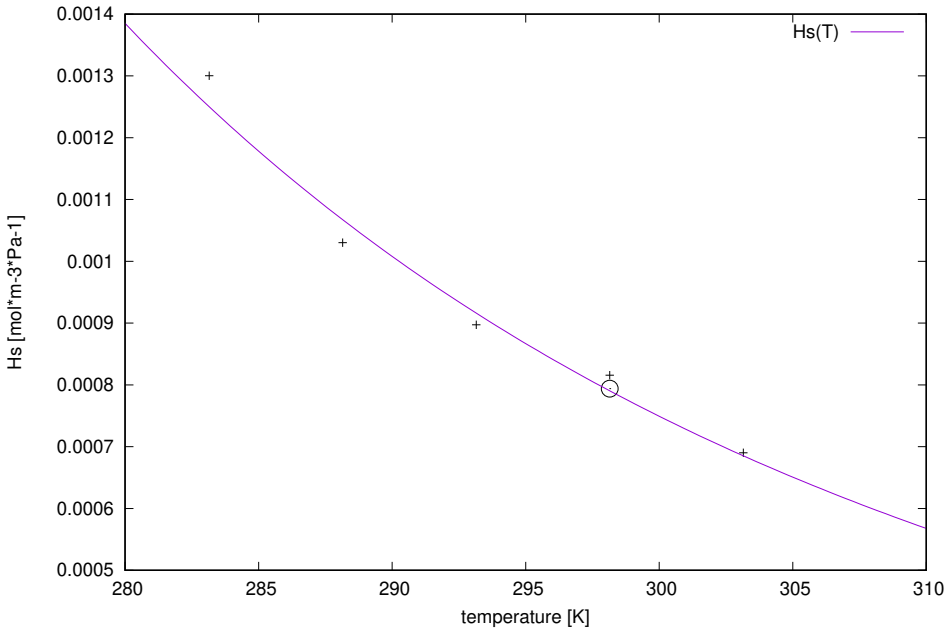

ref = 1156; chem = chloroethene; casrn = 75-01-4; r2 = 0.96774

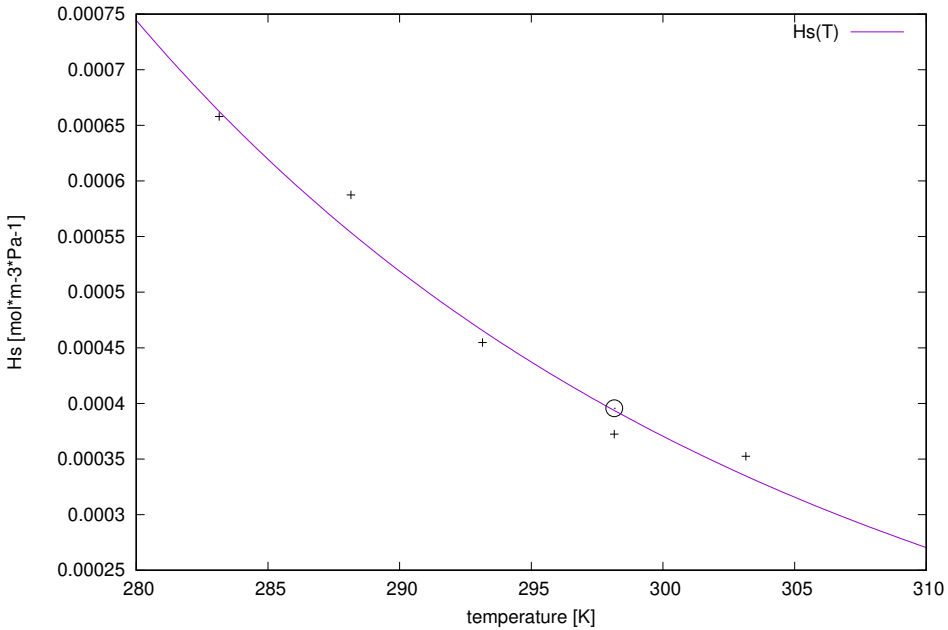

ref = 1156; chem = dichloromethane; casrn = 75-09-2; r2 = 0.98734

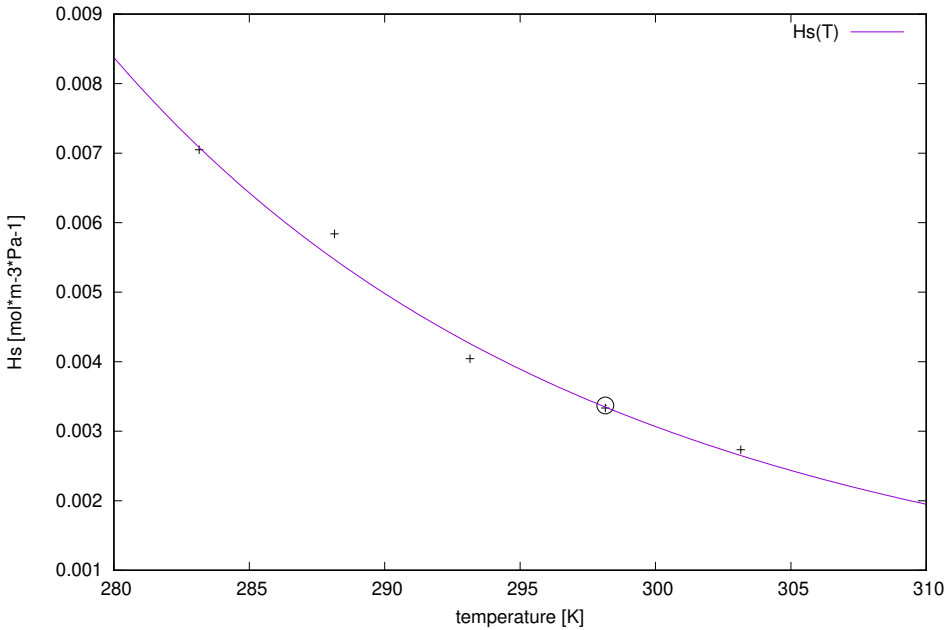

ref = 1156; chem = 1,1-dichloroethane; casrn = 75-34-3; r2 = 0.99103

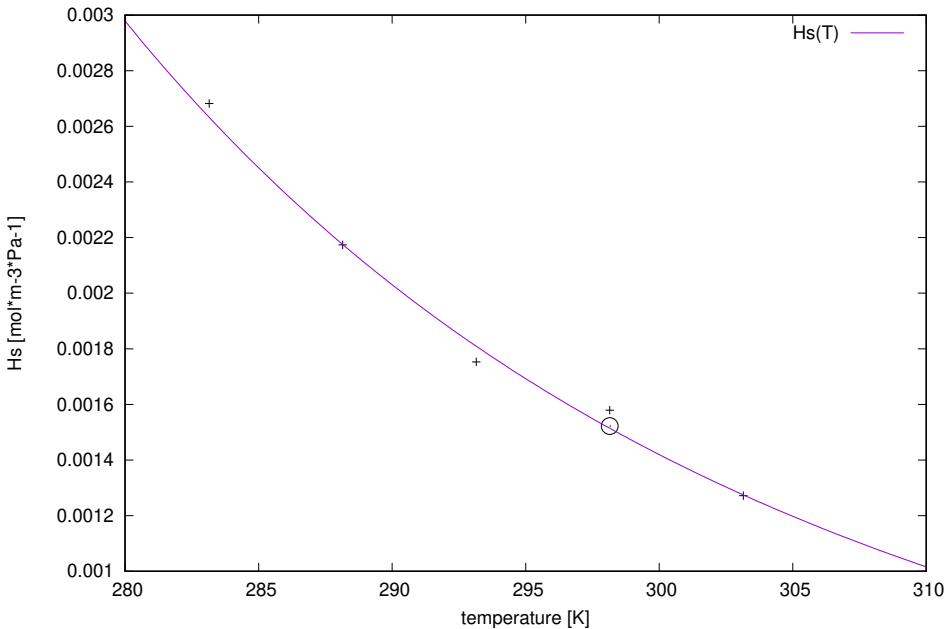



ref = 1156; chem = 1,1-dichloroethene; casrn = 75-35-4; r2 = 0.97411

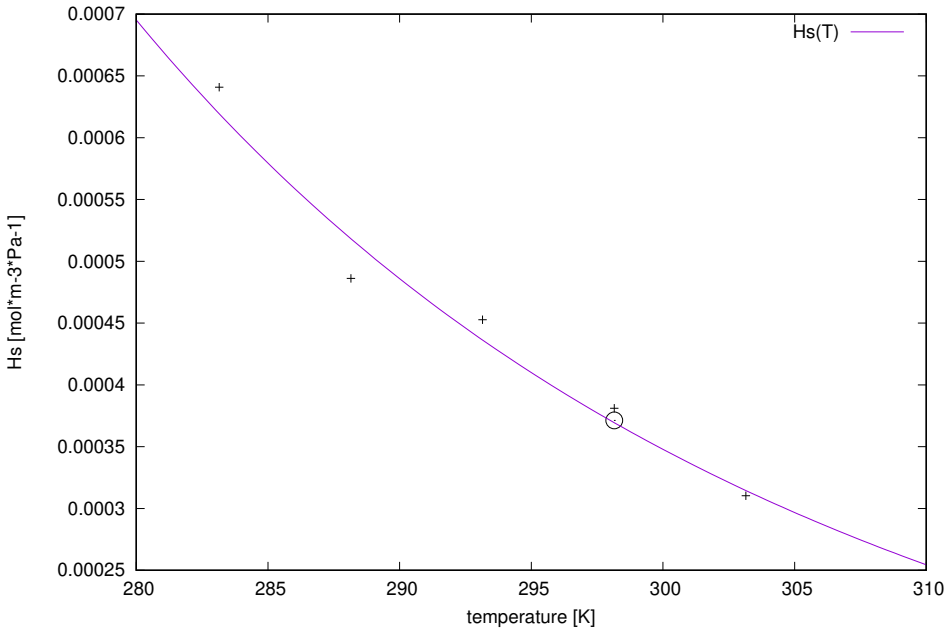

ref = 1156; chem = trichlorofluoromethane; casrn = 75-69-4; r2 = 0.99793

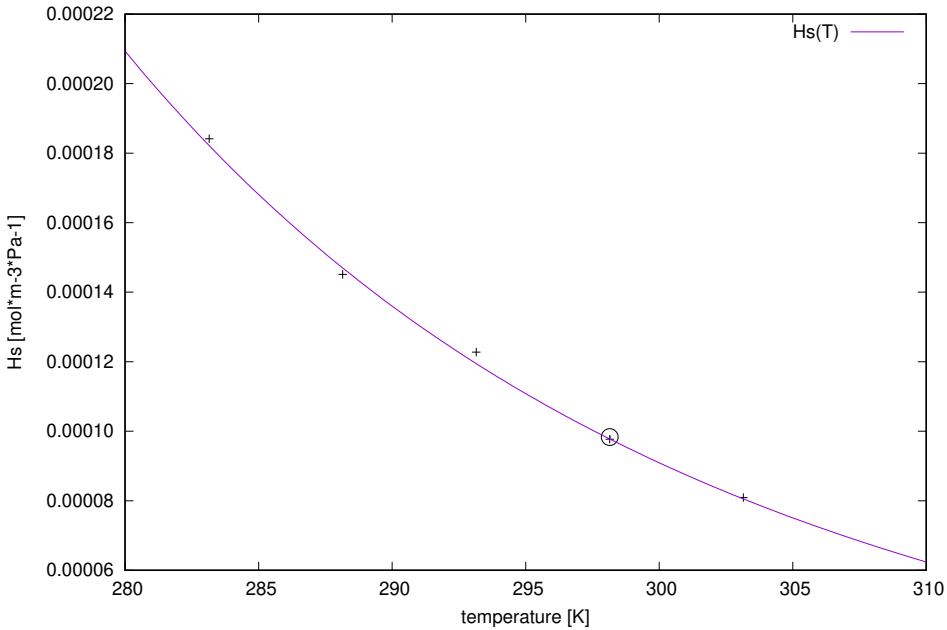

ref = 1156; chem = 1,1,2-trichlorotrifluoroethane; casrn = 76-13-1; r2 = 0.93563

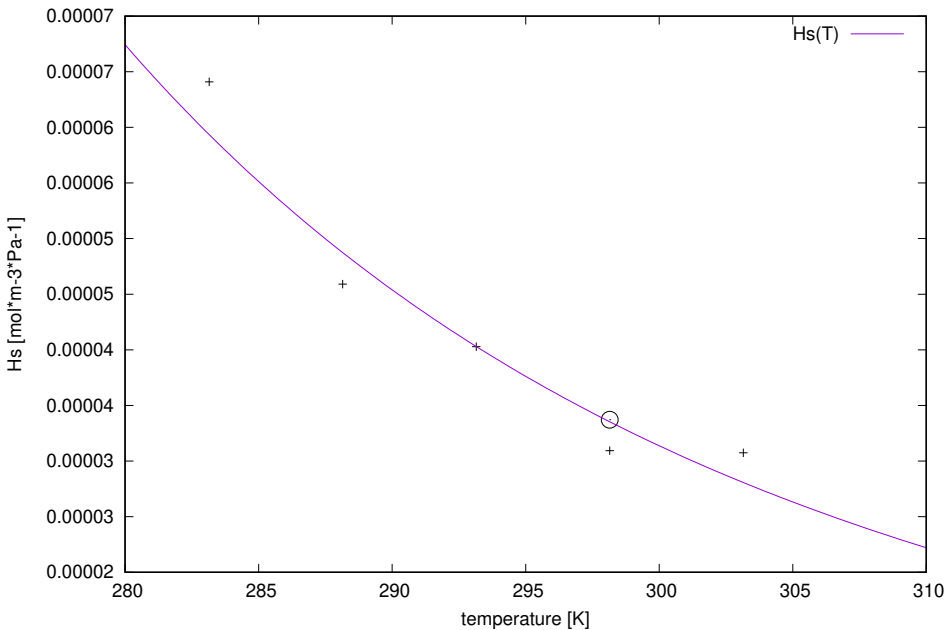

ref = 1156; chem = 1,2-dichloropropane; casrn = 78-87-5; r2 = 0.81885

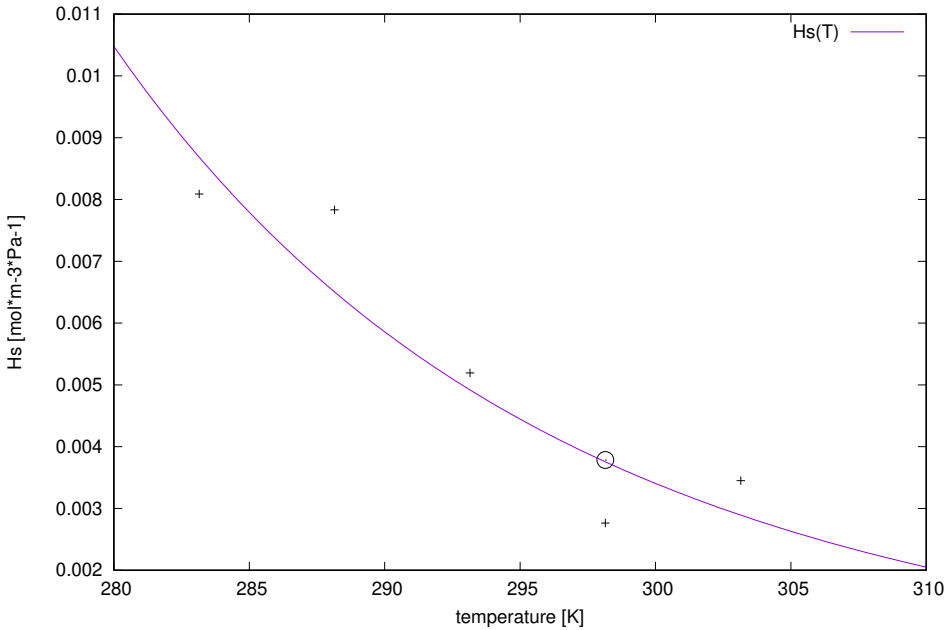

ref = 1156; chem = 2-butanone; casrn = 78-93-3; r2 = 0.79116

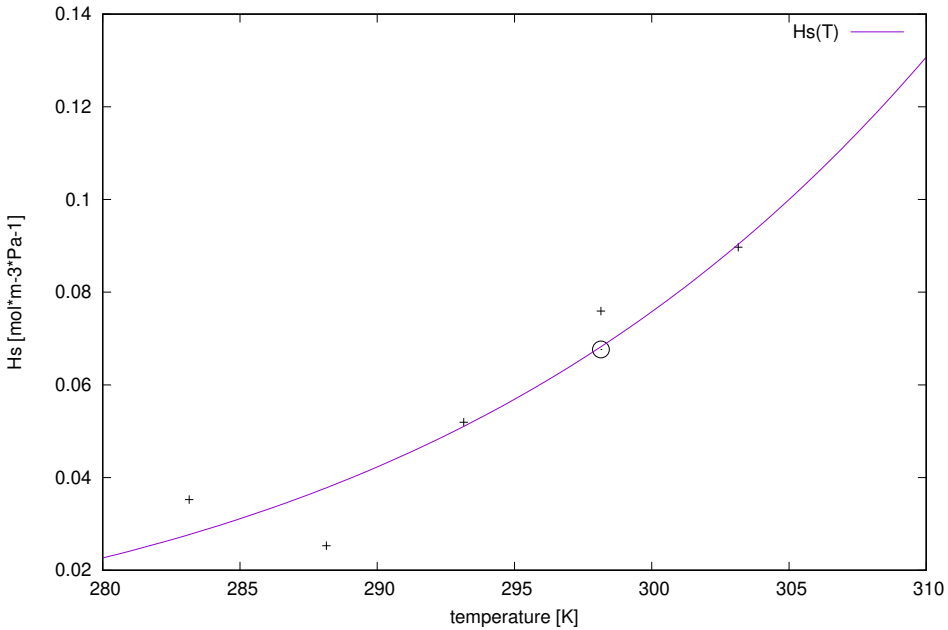

ref = 1156; chem = 1,1,2-trichloroethane; casrn = 79-00-5; r2 = 0.96913

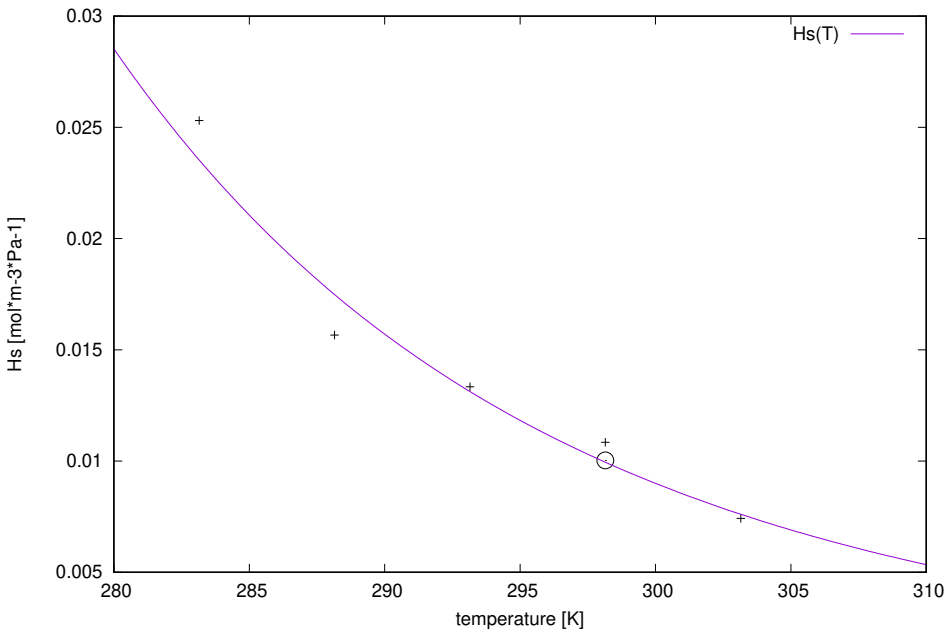

ref = 1156; chem = trichloroethene; casrn = 79-01-6; r2 = 0.99919

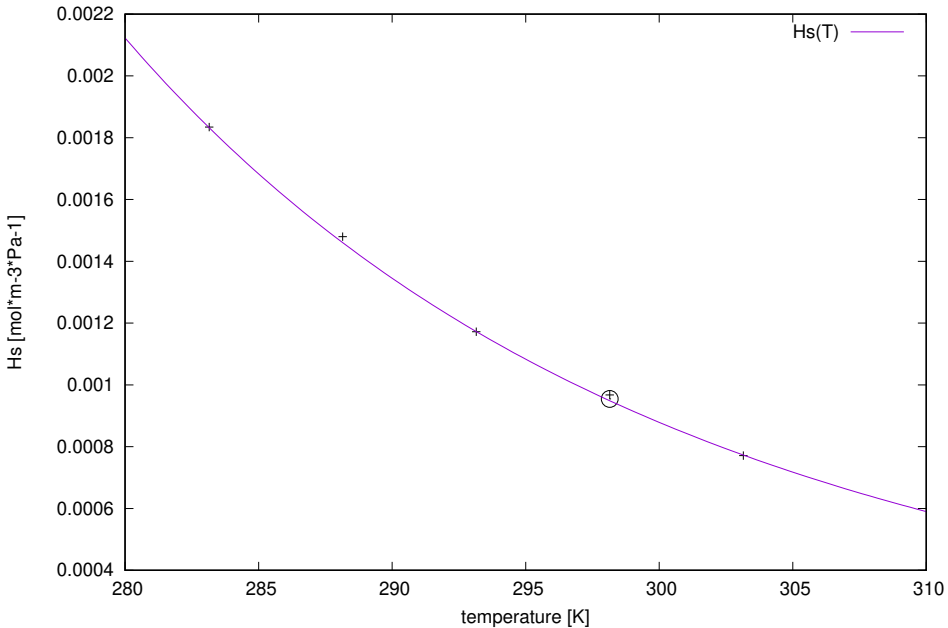

ref = 1156; chem = 1,1,2,2-tetrachloroethane; casrn = 79-34-5; r2 = 0.20921

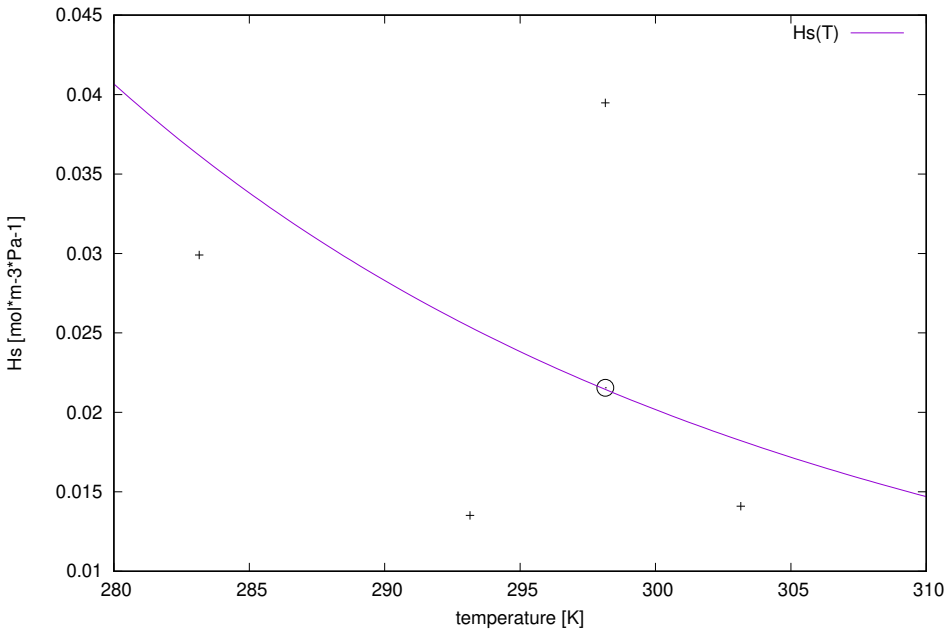



ref = 1156; chem = decalin; casrn = 91-17-8; r2 = 0.92063

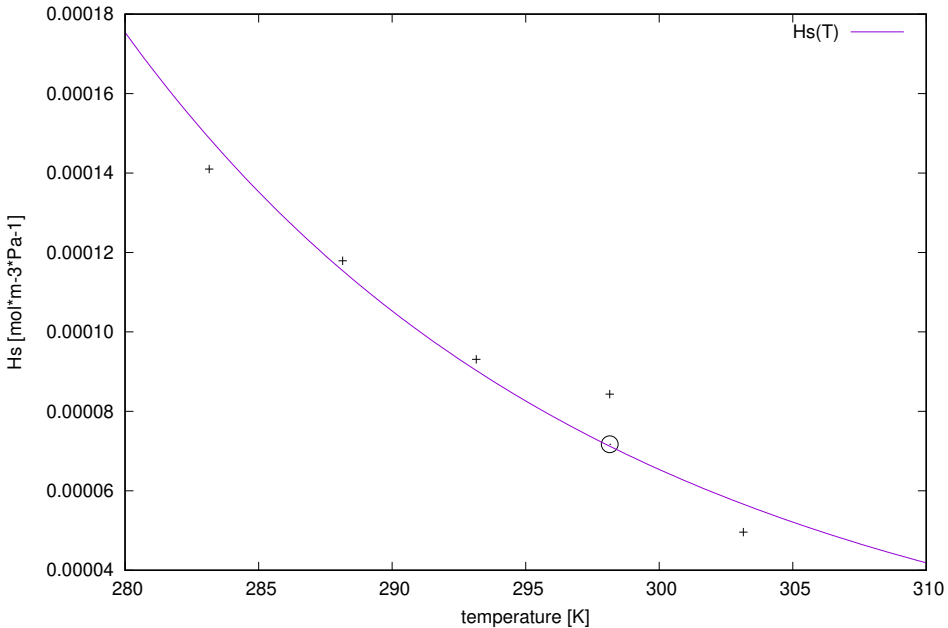

ref = 1156; chem = 1,2-dimethylbenzene; casrn = 95-47-6; r2 = 0.96268

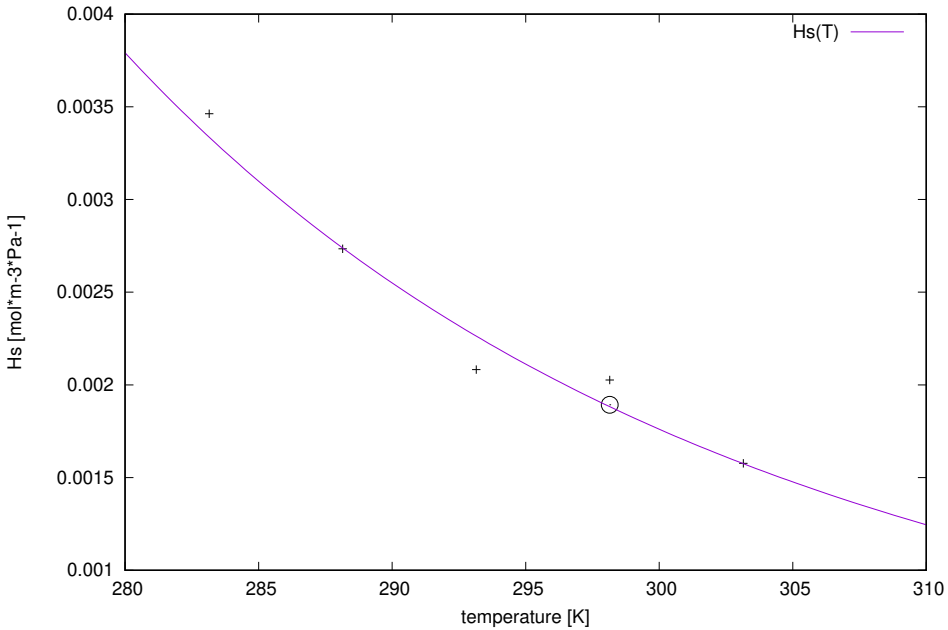

ref = 1156; chem = 1,2-dichlorobenzene; casrn = 95-50-1; r2 = 0.46116

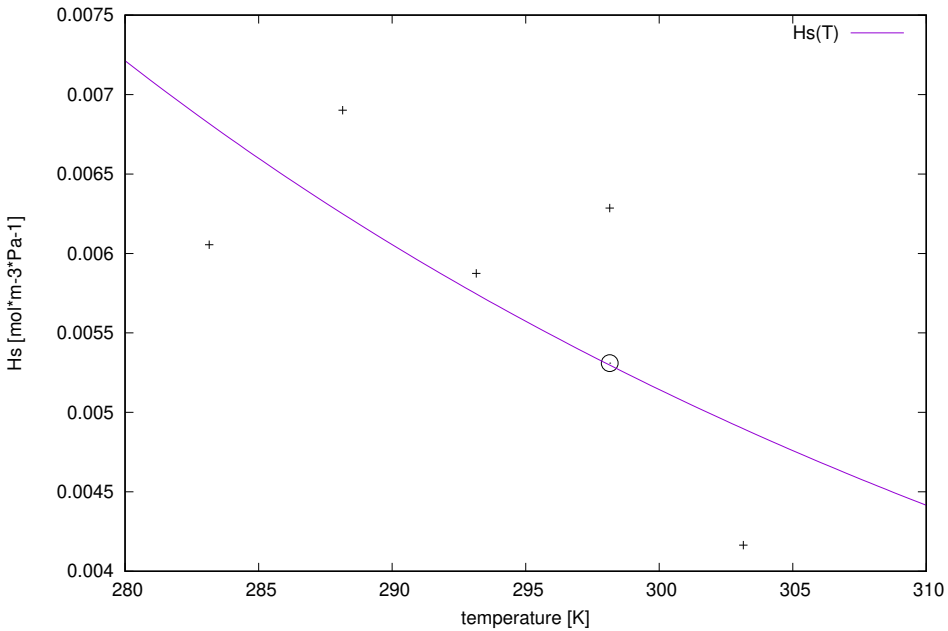

ref = 1156; chem = (2-propyl)-benzene; casrn = 98-82-8; r2 = 0.96824

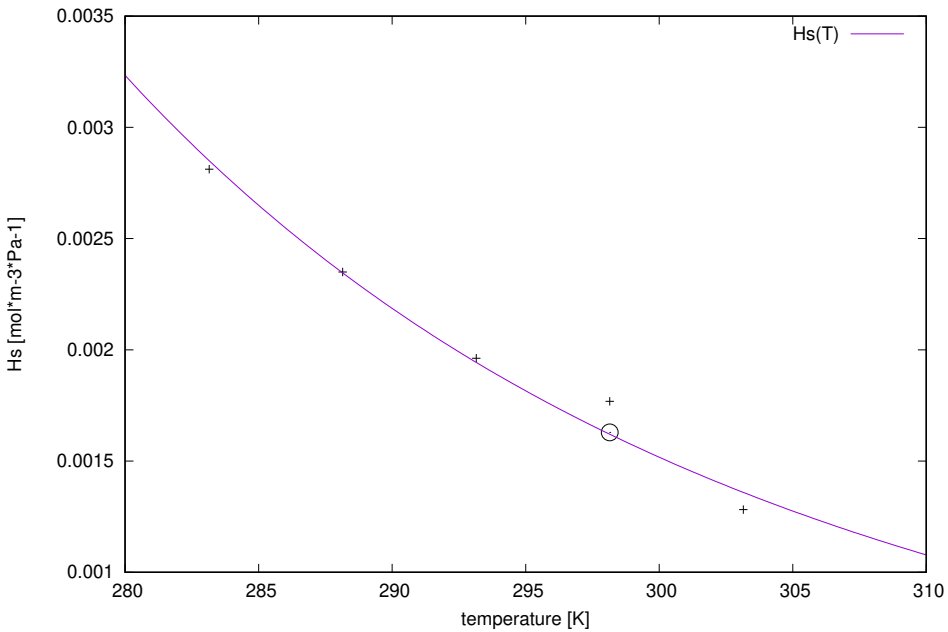

ref = 1229; chem = ethylbenzene; casrn = 100-41-4; r2 = 0.99974

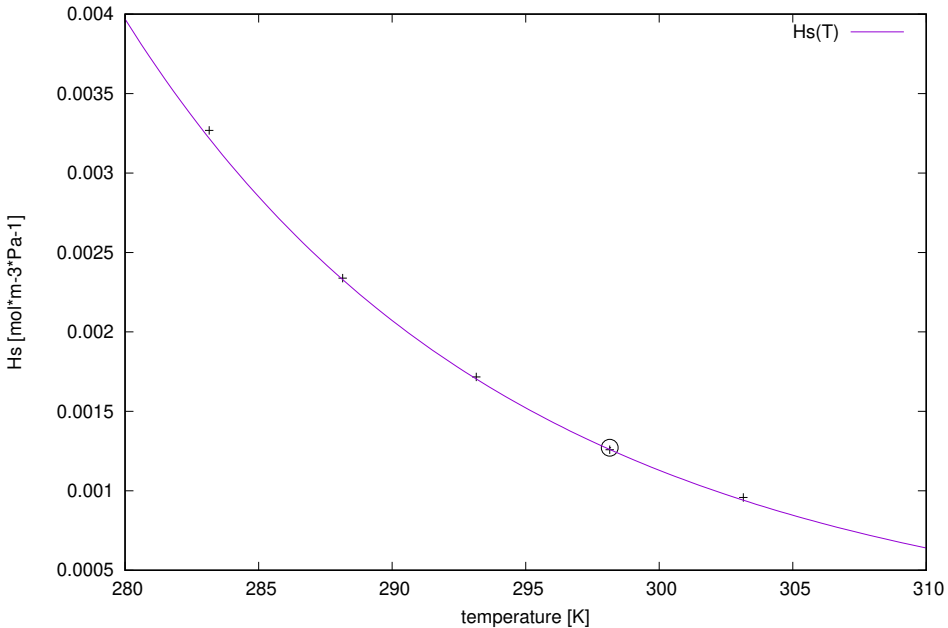

ref = 1229; chem = propylbenzene; casrn = 103-65-1; r2 = 0.99939

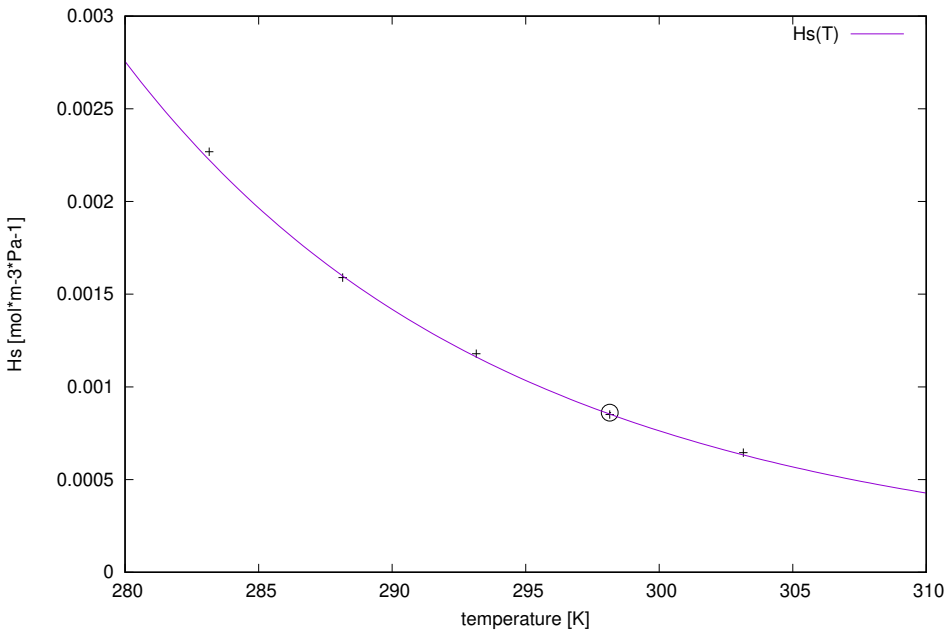

ref = 1229; chem = butylbenzene; casrn = 104-51-8; r2 = 0.99522

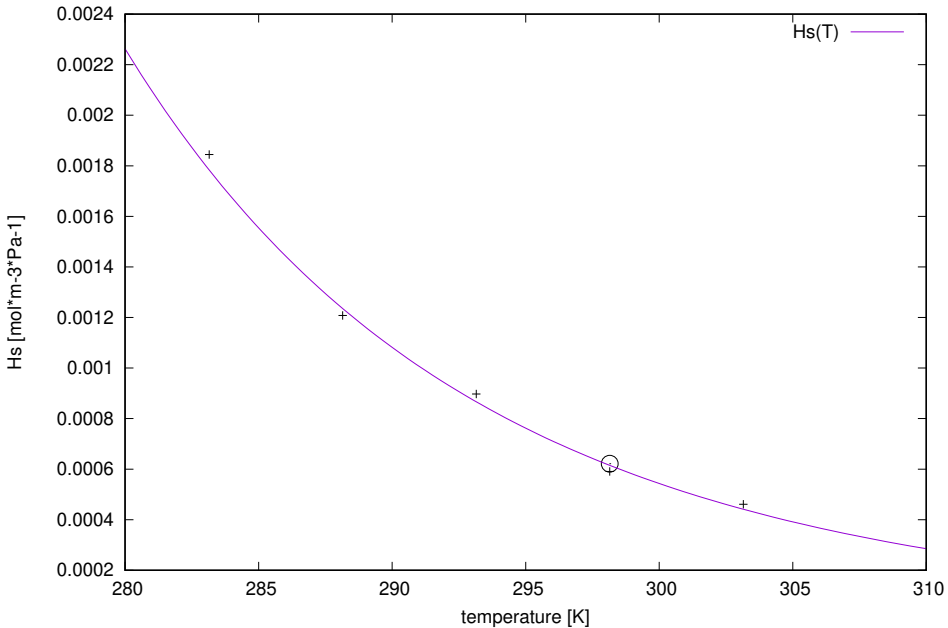

ref = 1229; chem = methylbenzene; casrn = 108-88-3; r2 = 0.99952

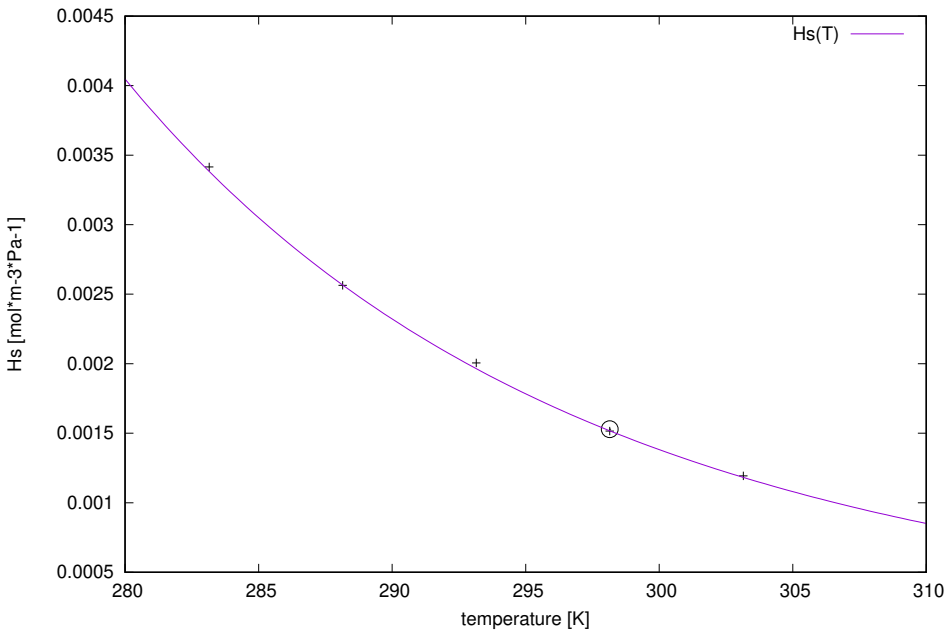



ref = 1229; chem = benzene; casrn = 71-43-2; r2 = 0.99748

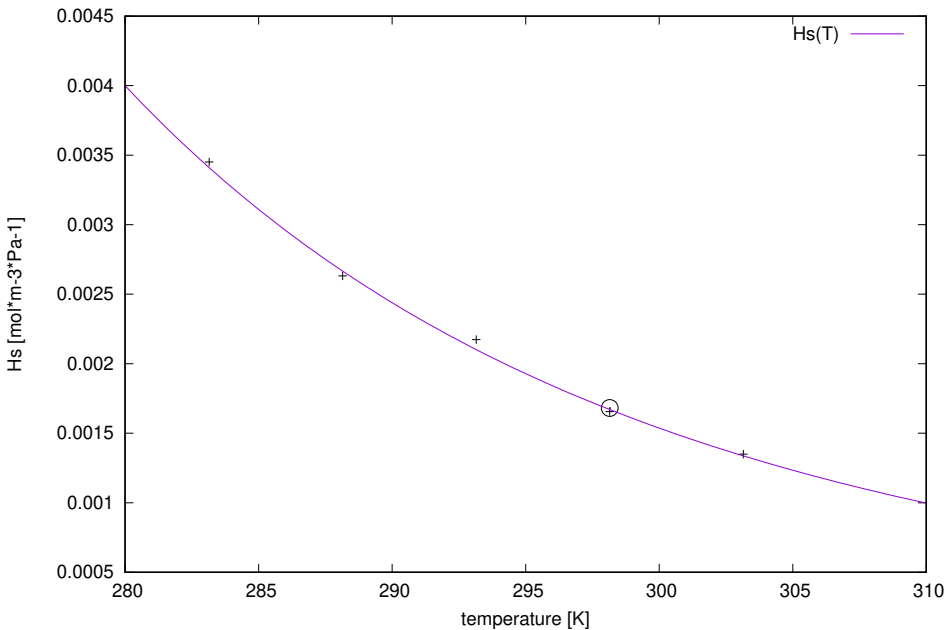

ref = 1230; chem = chlorine (molecular); casrn = 7782-50-5; r2 = 0.99889

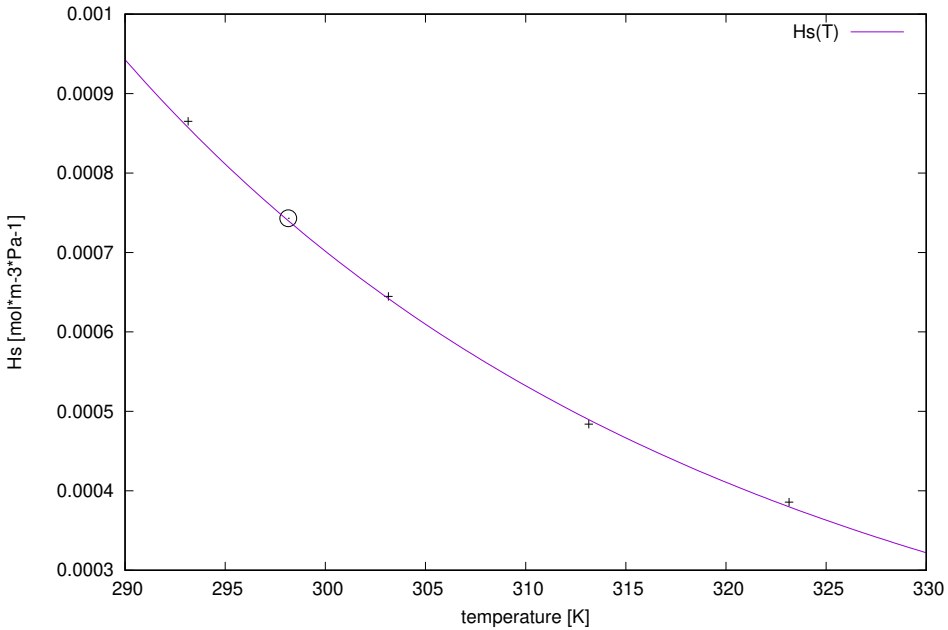

ref = 1331; chem = methylbenzene; casrn = 108-88-3; r2 = 0.99214

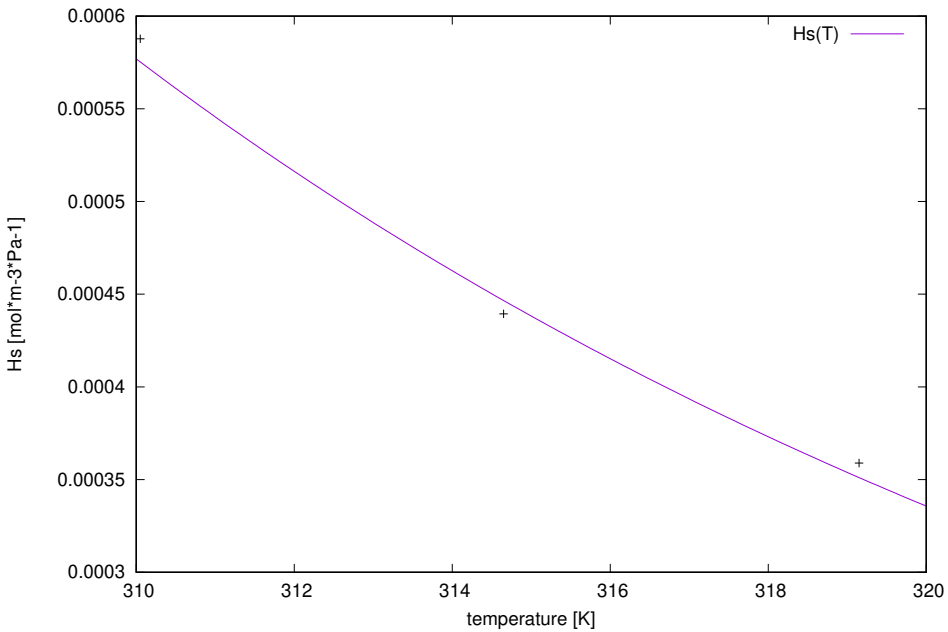

ref = 1331; chem = 2,6-dichlorobenzenenitrile; casrn = 1194-65-6; r2 = 0.98185

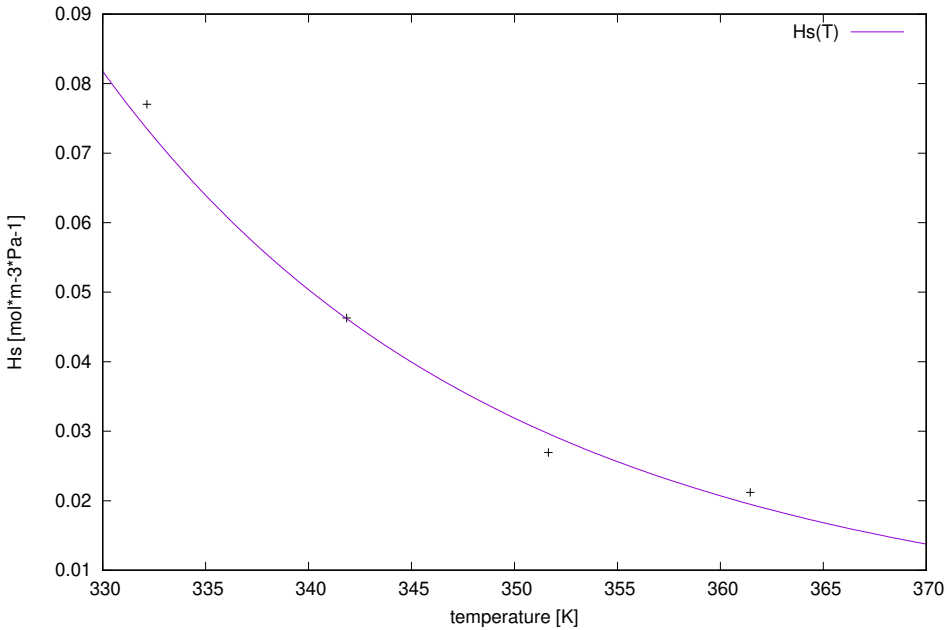

ref = 1331; chem = propanone; casrn = 67-64-1; r2 = 0.99989

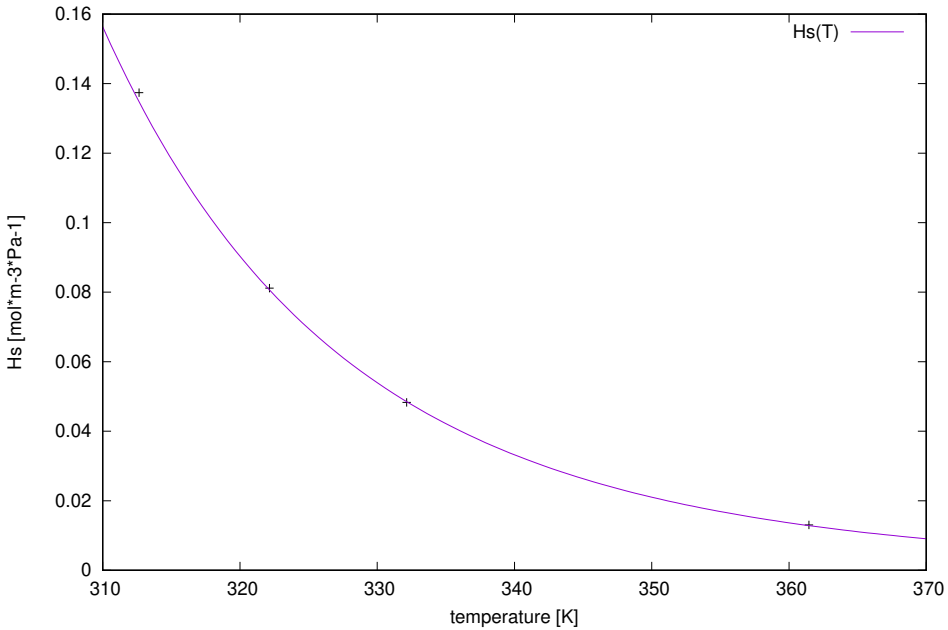

ref = 1331; chem = trichloroethene; casrn = 79-01-6; r2 = 0.99274

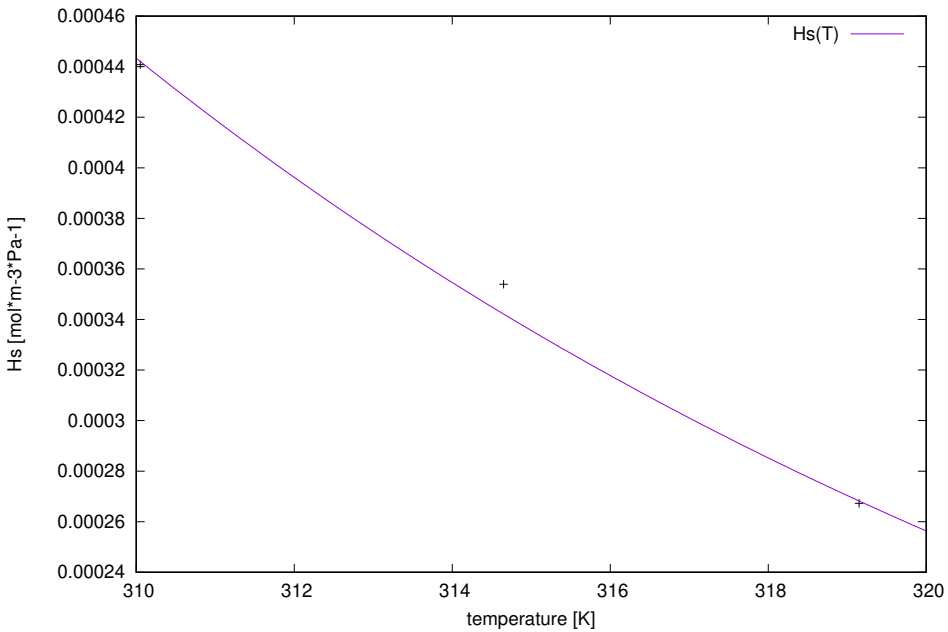

ref = 1342; chem = bromomethane; casrn = 74-83-9; r2 = 1.00000

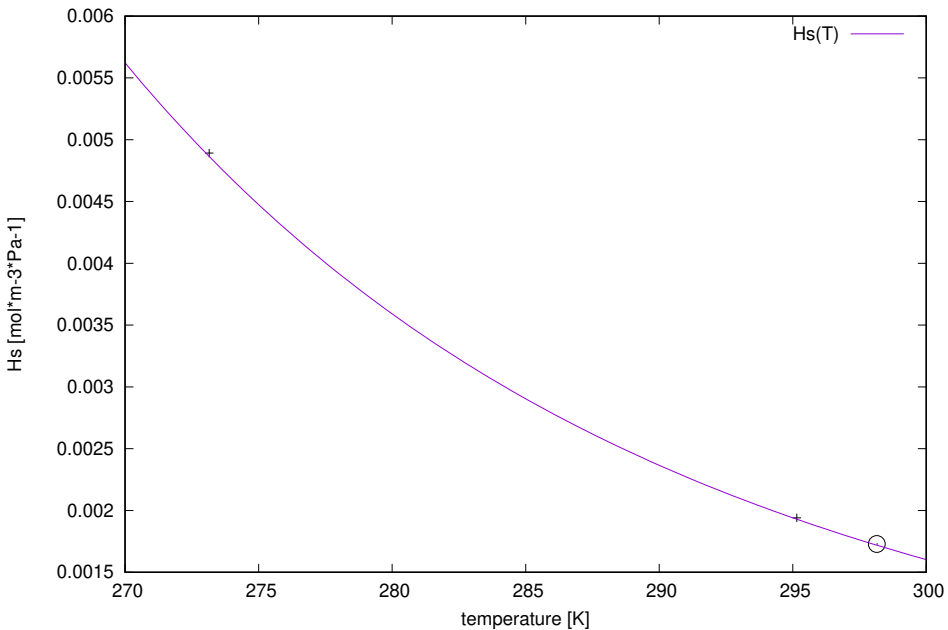

ref = 1342; chem = chloromethane; casrn = 74-87-3; r2 = 1.00000

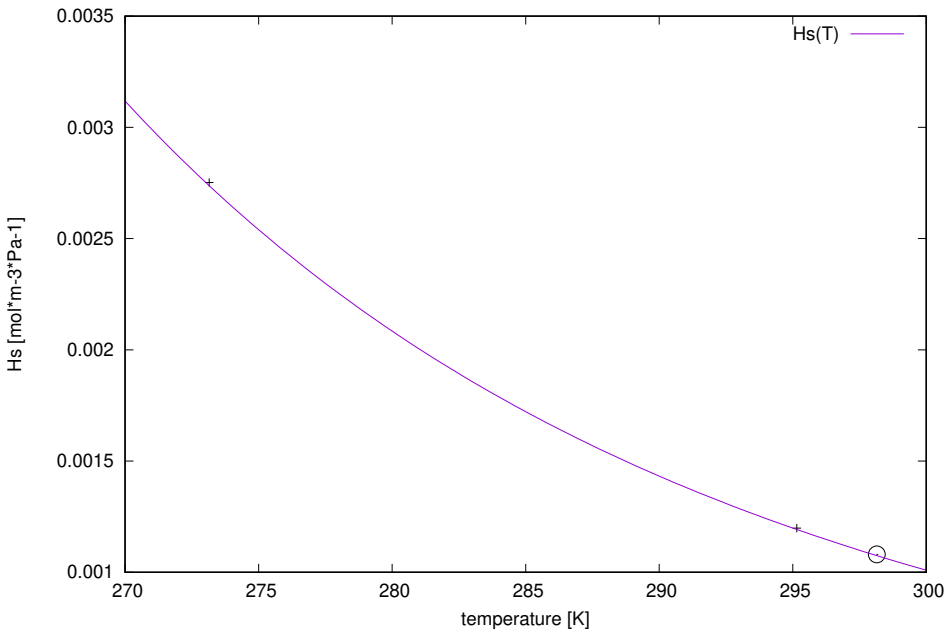



ref = 1342; chem = iodomethane; casrn = 74-88-4; r2 = 1.00000

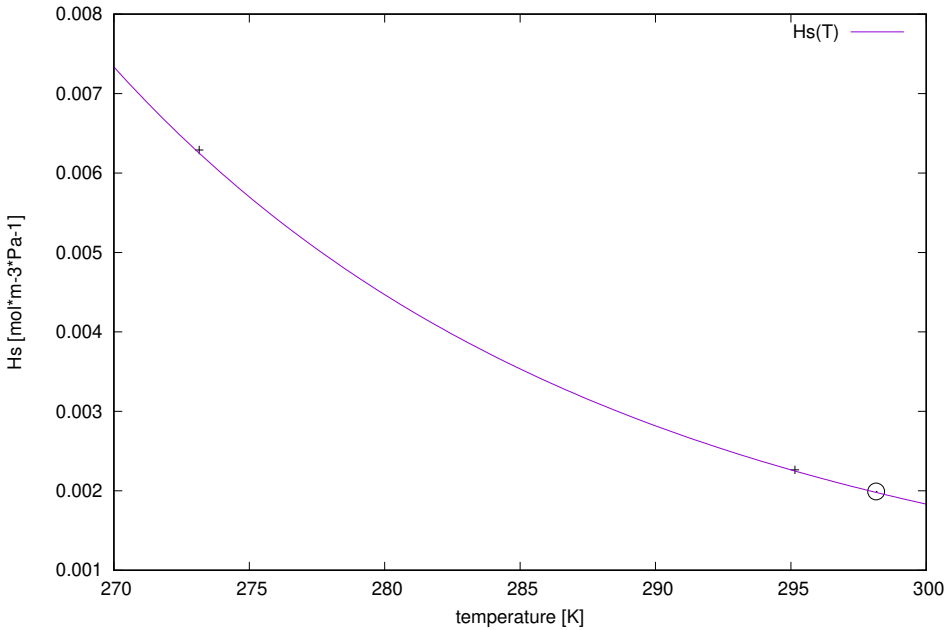

ref = 1773; chem = dimethyl sulfide; casrn = 75-18-3; r2 = 0.96583

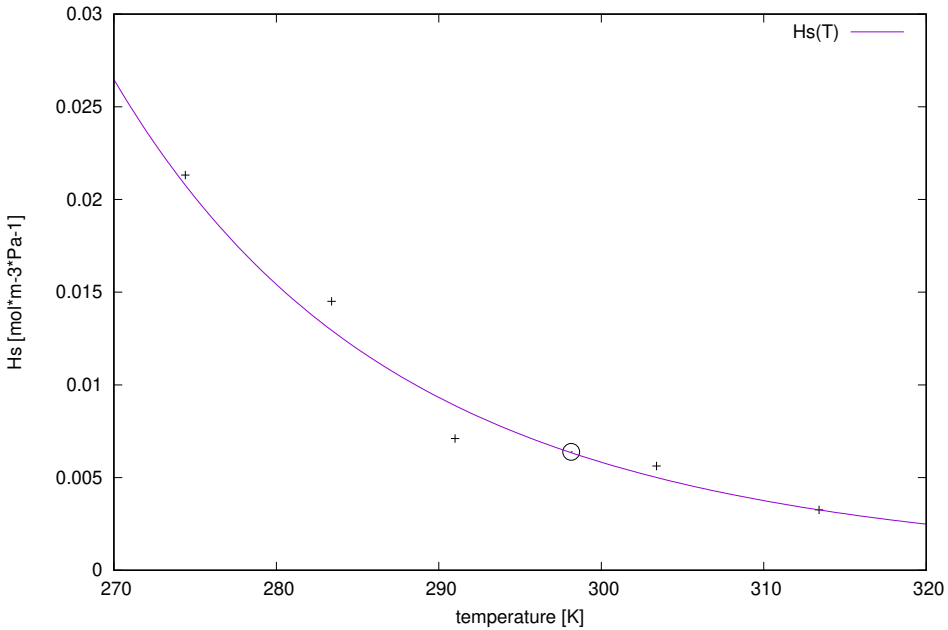

ref = 1775; chem = 1,1,2-trichlorotrifluoroethane; casrn = 76-13-1; r2 = 0.99997

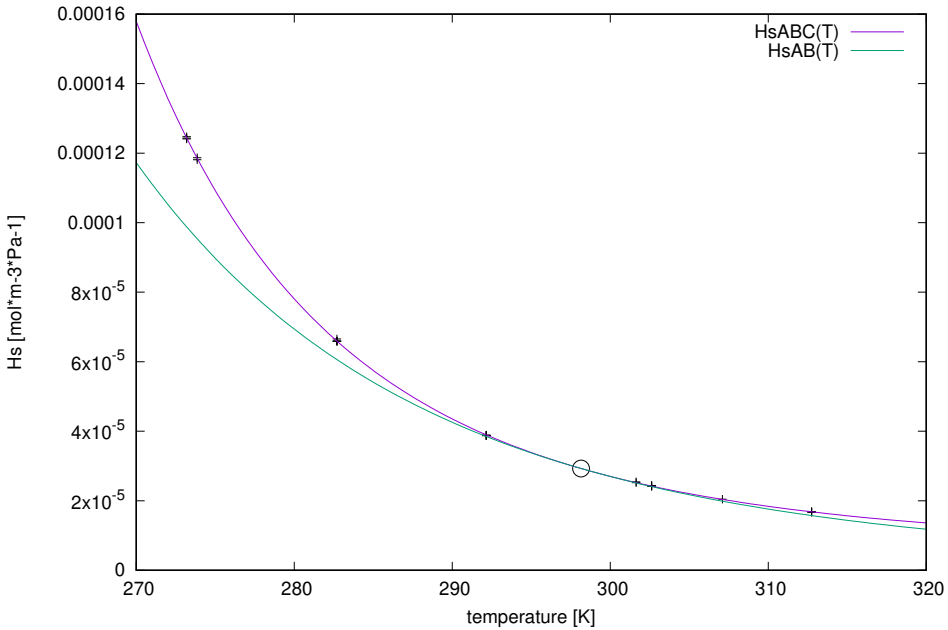

ref = 1776; chem = sulfur hexafluoride; casrn = 2551-62-4; r2 = 0.99969

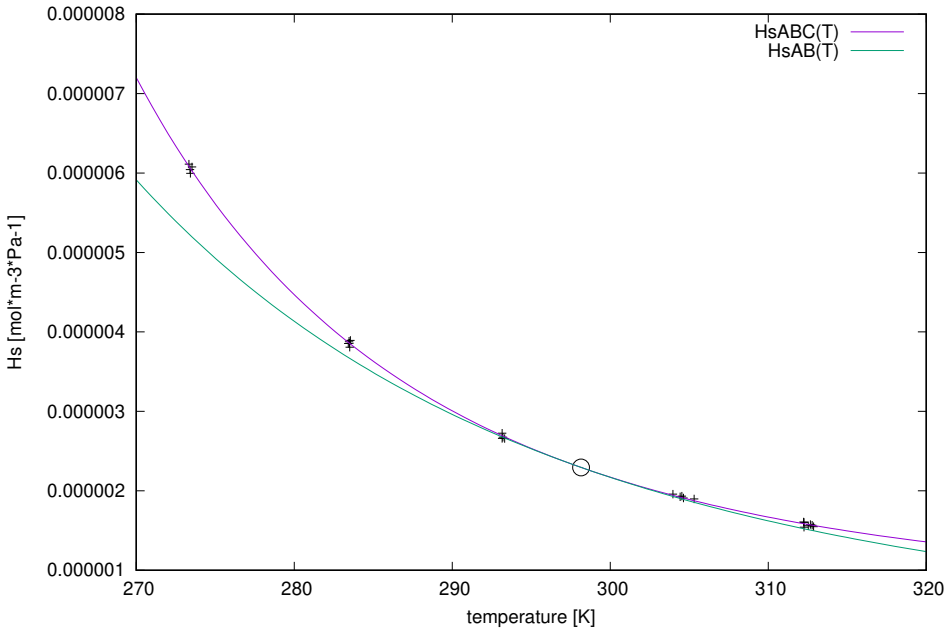

ref = 1911; chem = carbon monoxide; casrn = 630-08-0; r2 = 0.99984

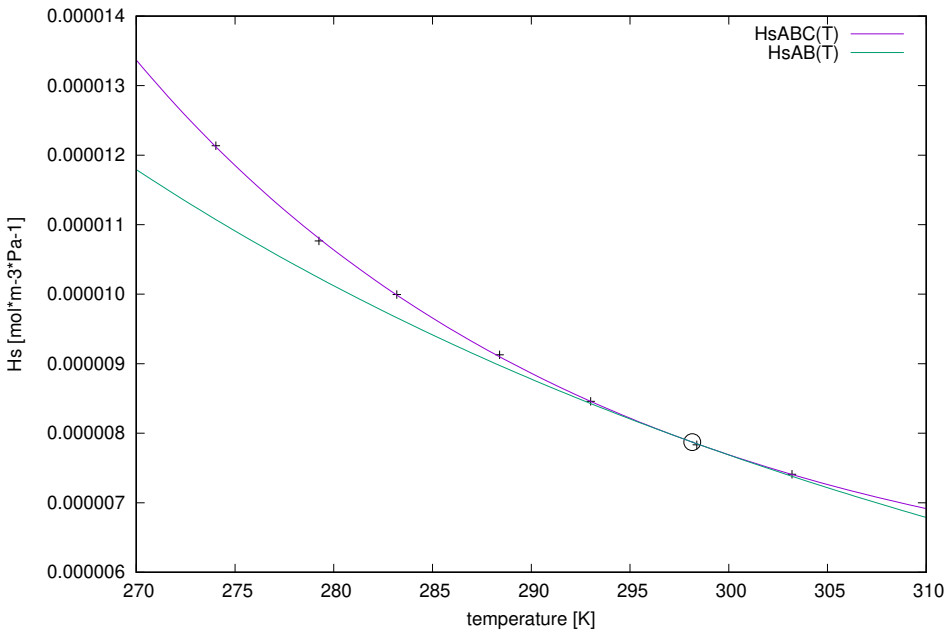

ref = 1925; chem = ethanedioic acid; casrn = 144-62-7; r2 = 0.99986

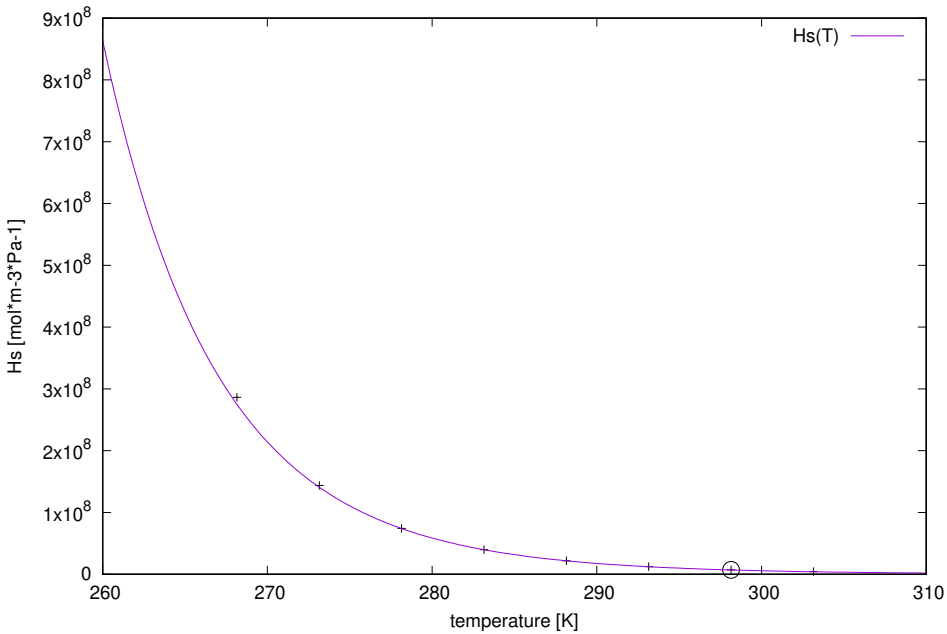

ref = 1929; chem = 1-propanethiol; casrn = 107-03-9; r2 = 0.94049

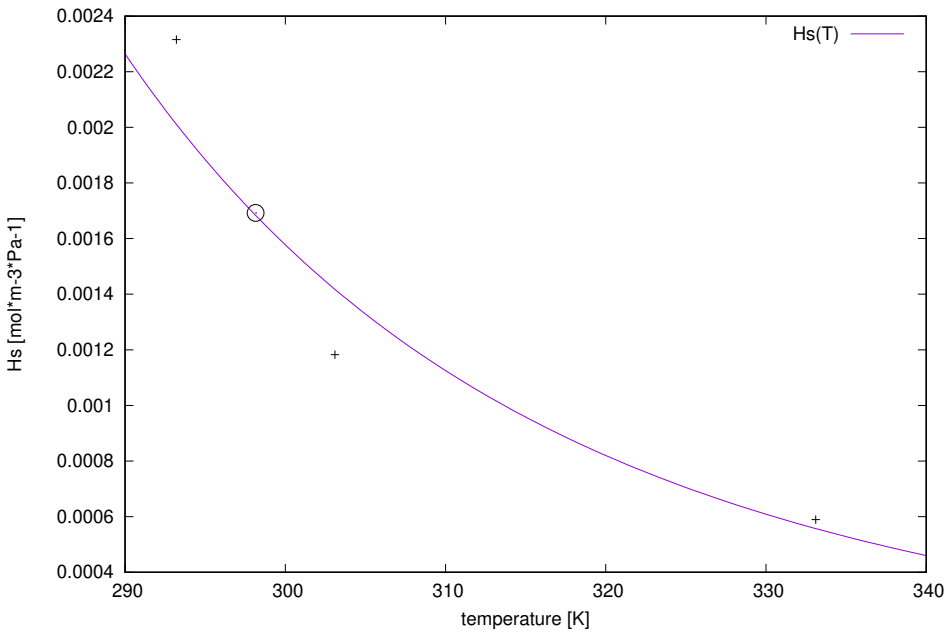

ref = 1929; chem = 1-butanethiol; casrn = 109-79-5; r2 = 0.99409

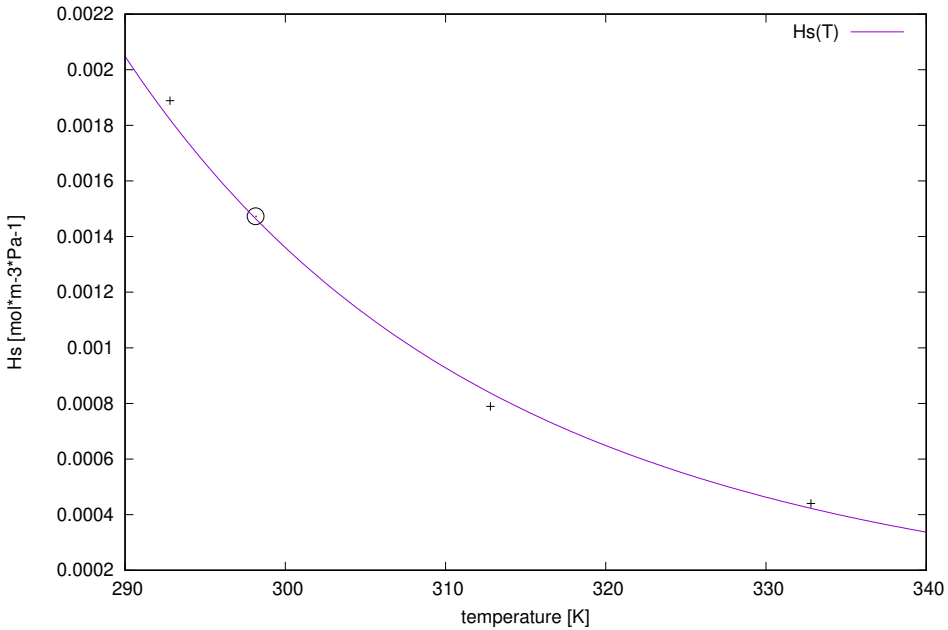



ref = 1929; chem = dimethyl sulfide; casrn = 75-18-3; r2 = 0.99950

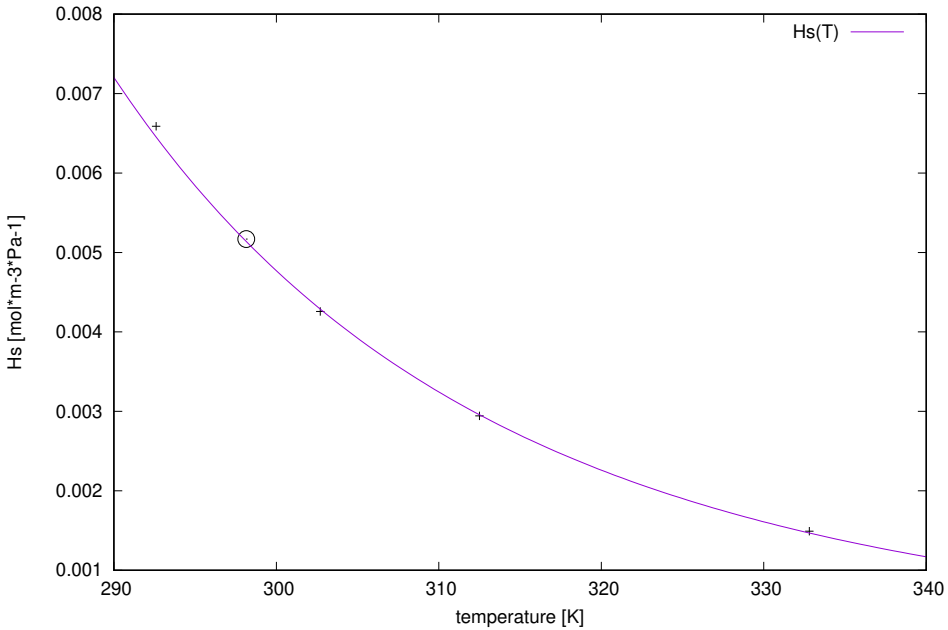

ref = 1936; chem = dimethyl sulfide; casrn = 75-18-3; r2 = 0.99995

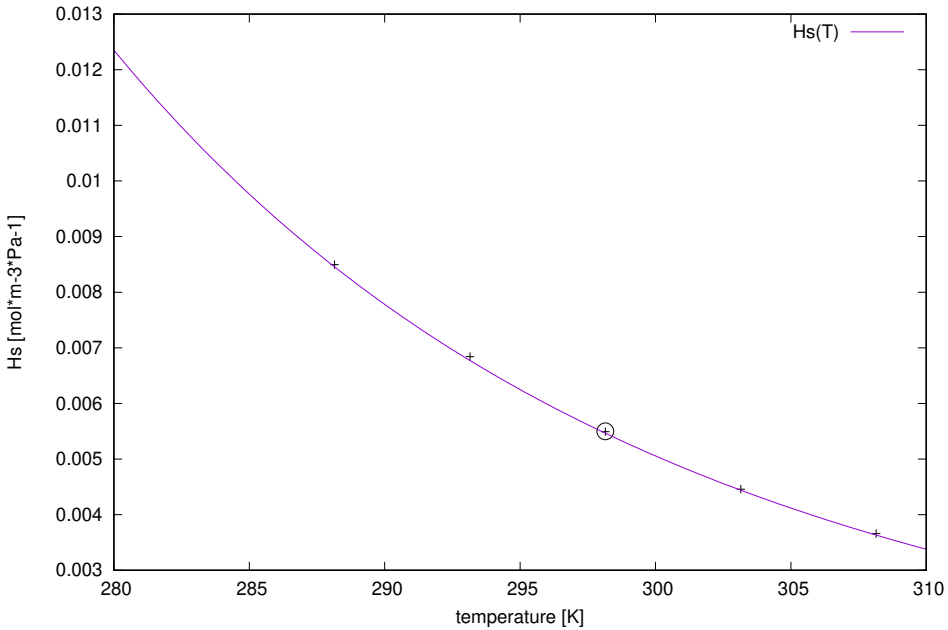

ref = 1940; chem = dimethyl succinate; casrn = 106-65-0; r2 = 0.94365

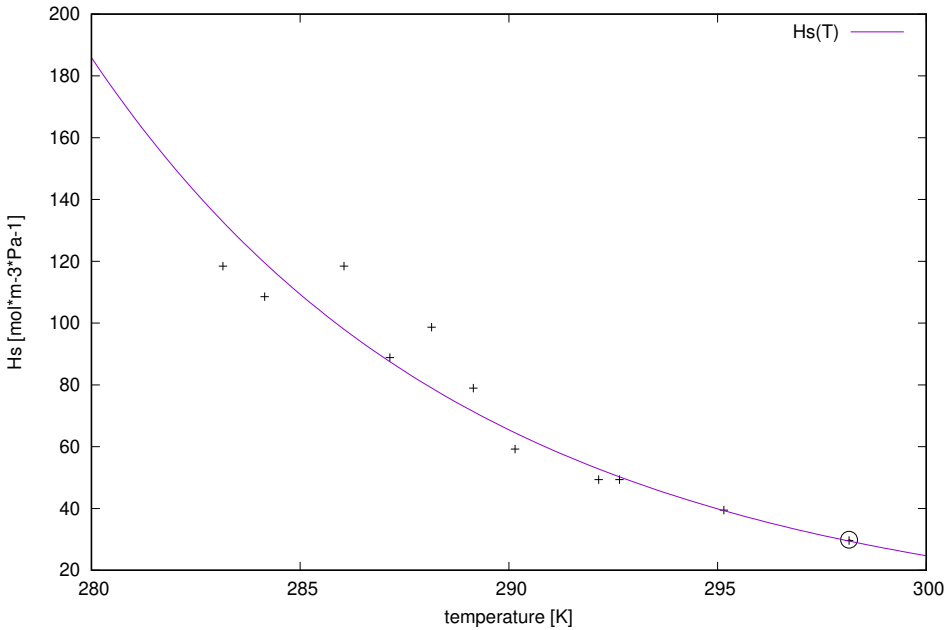

ref = 1940; chem = dimethyl malonate; casrn = 108-59-8; r2 = 0.91334

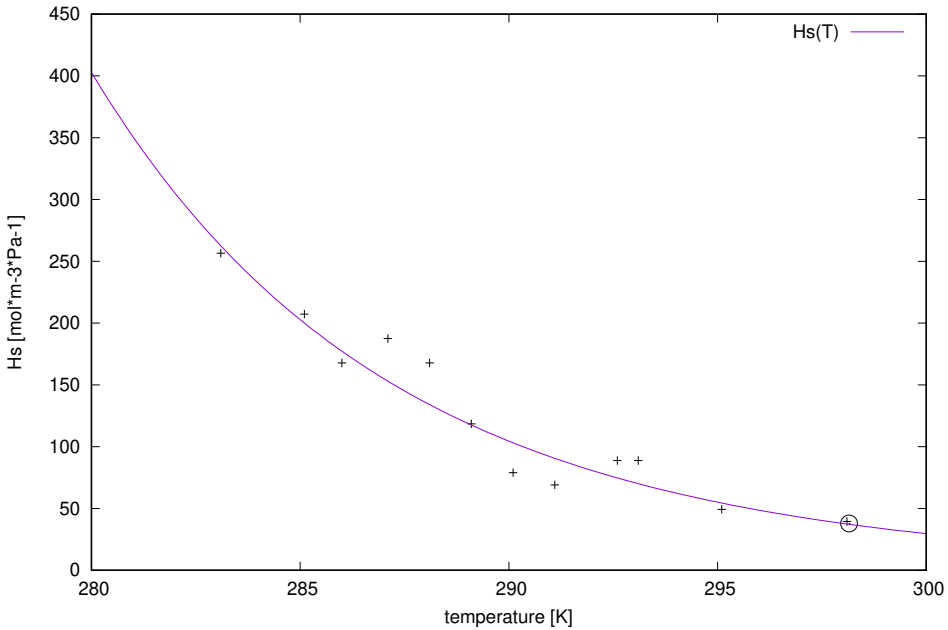

ref = 1942; chem = 4-(1,1,3,3-tetramethylbutyl)-phenol; casrn = 140-66-9; r2 = 0.93294

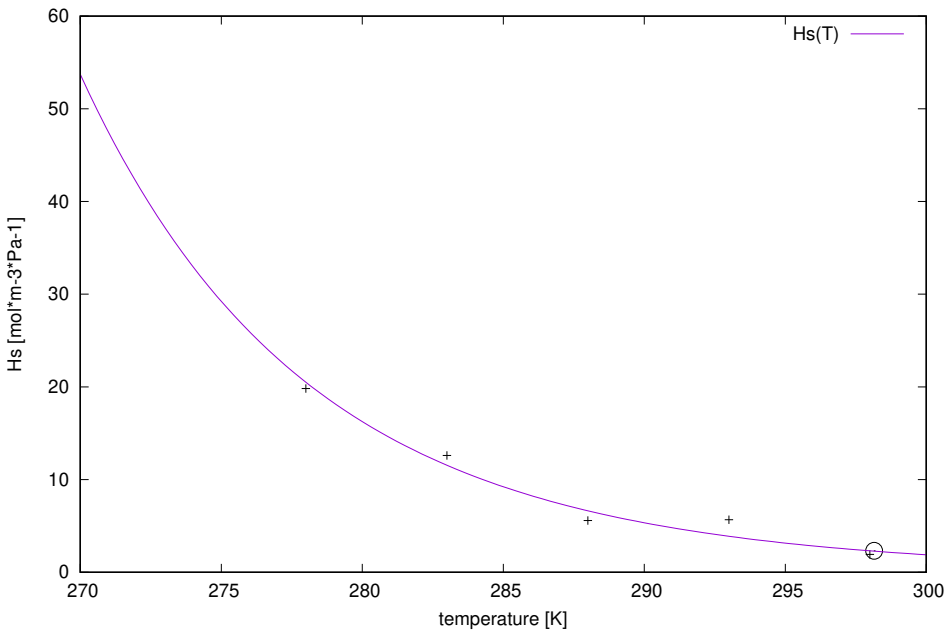

ref = 1942; chem =  $\gamma$ -1,2,3,4,5,6-hexachlorocyclohexane; casrn = 58-89-9; r2 = 0.91632

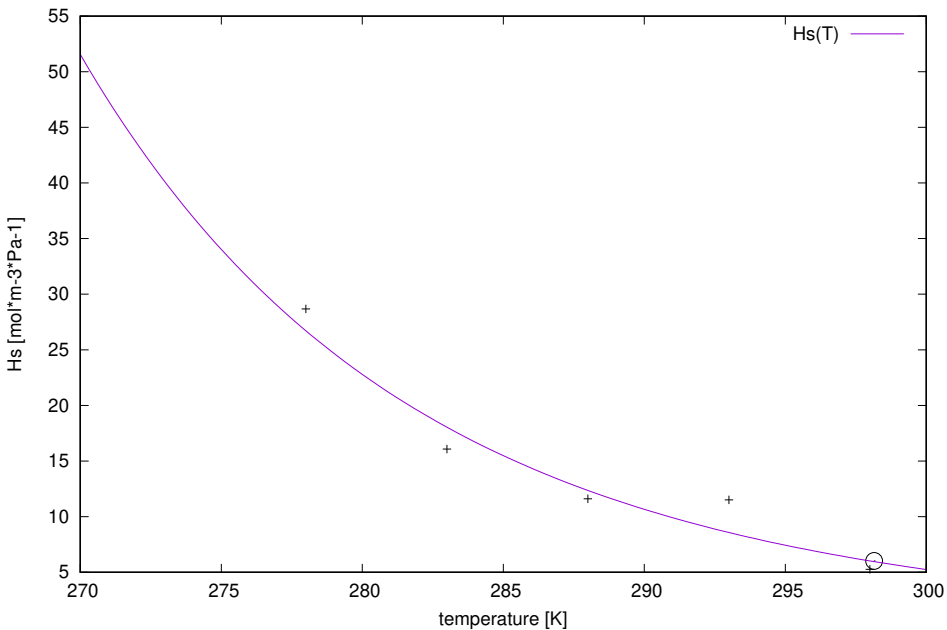

ref = 1942; chem = 4-(3',5'-dimethyl-3'-heptyl)-phenol(+); casrn = ; r2 = 0.96589

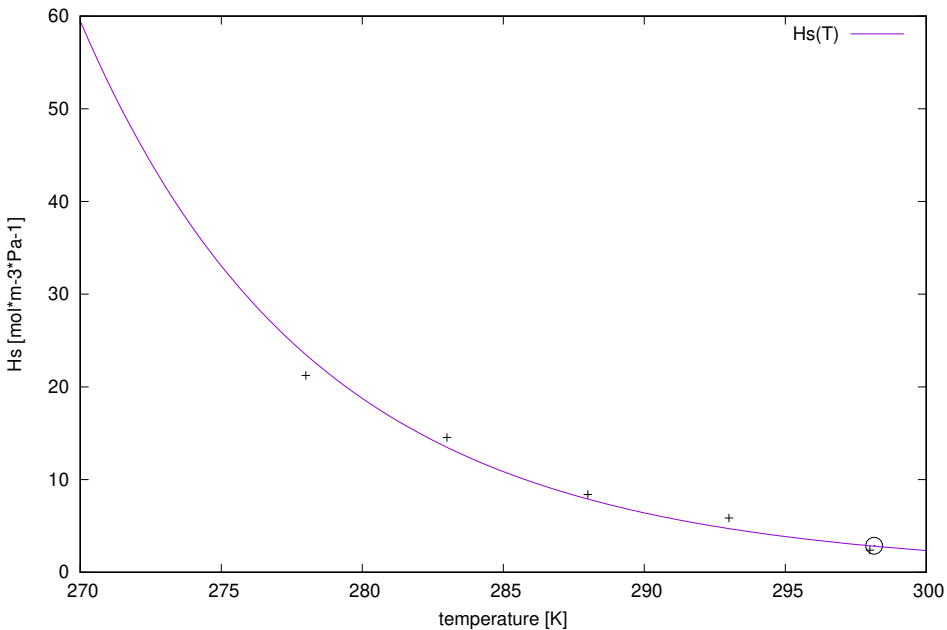

ref = 1942; chem = 4-(3',5'-dimethyl-3'-heptyl)-phenol(-); casrn = ; r2 = 0.96740

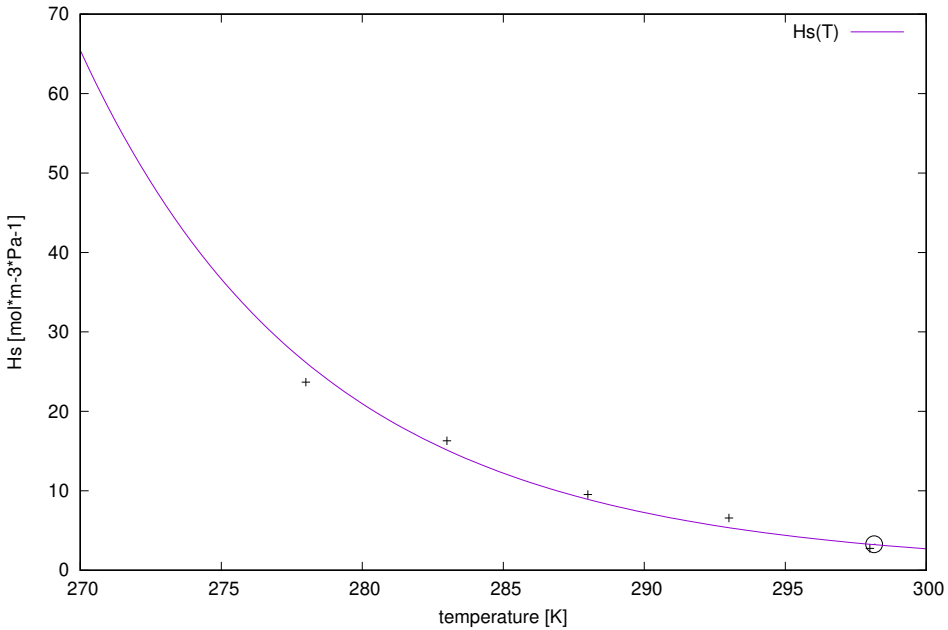



ref = 1943; chem = iodoethane; casrn = 75-03-6; r2 = 0.99815

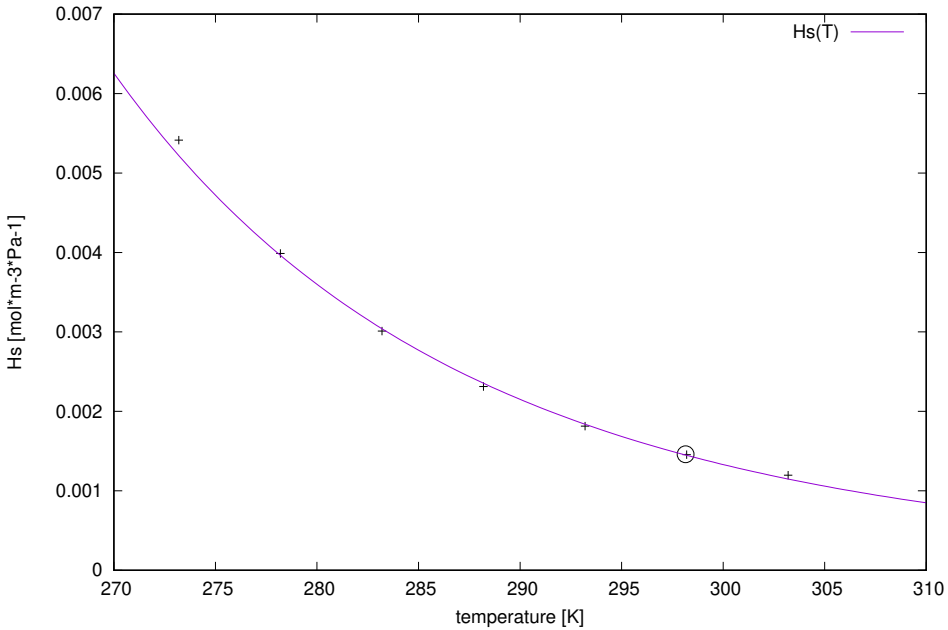

ref = 1943; chem = iodine (molecular); casrn = 7553-56-2; r2 = 0.98655

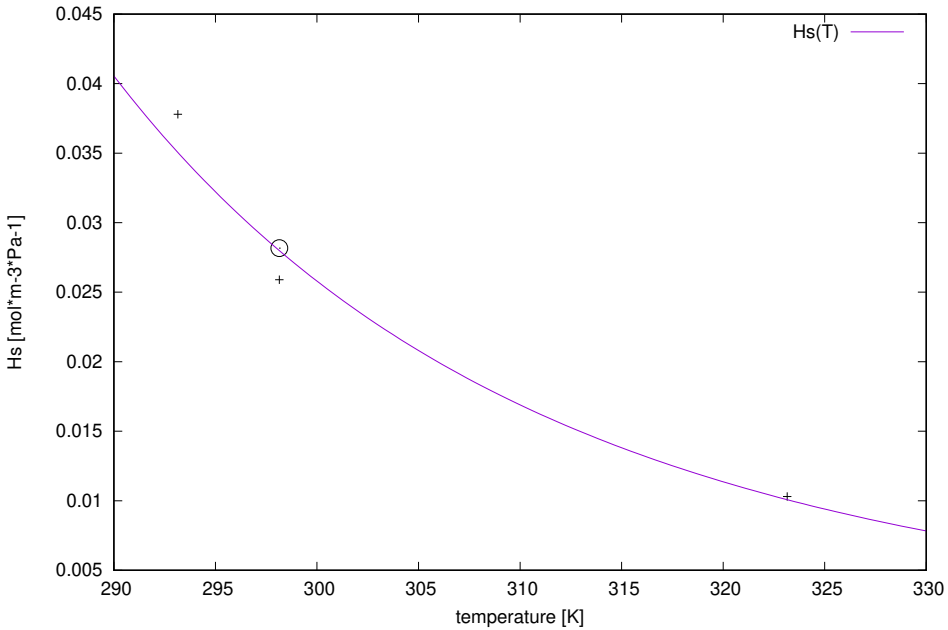

ref = 1943; chem = bromine (molecular); casrn = 7726-95-6; r2 = 0.99875

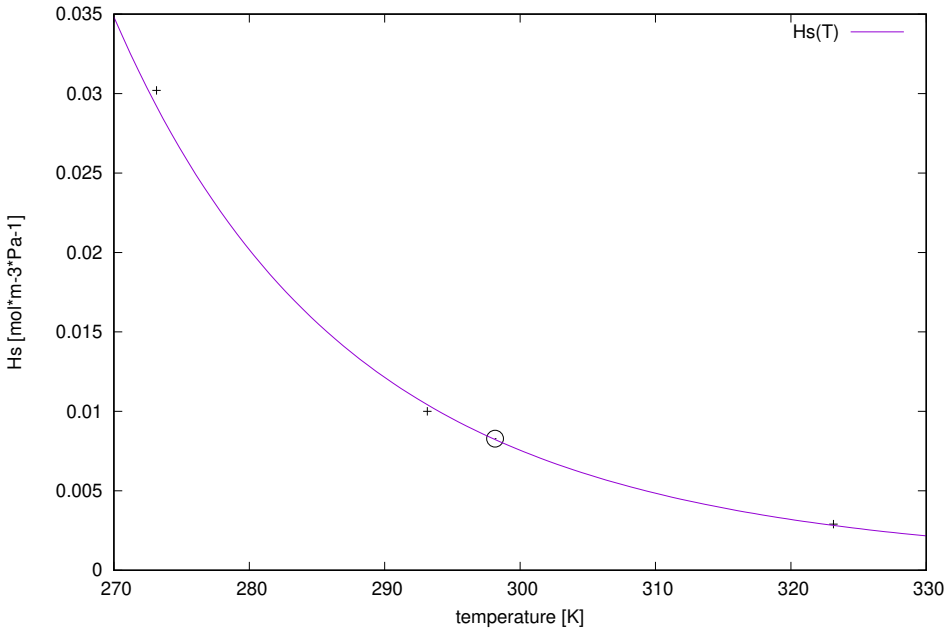

ref = 1992; chem = phosgene; casrn = 75-44-5; r2 = 0.99573

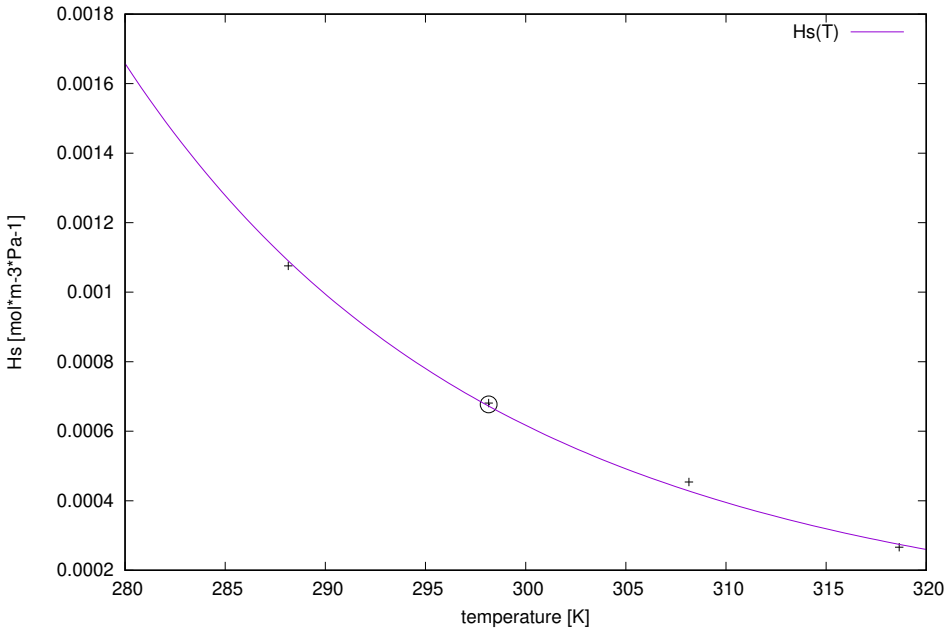

ref = 1996; chem = 1-nitropropane; casrn = 108-03-2; r2 = 0.99884

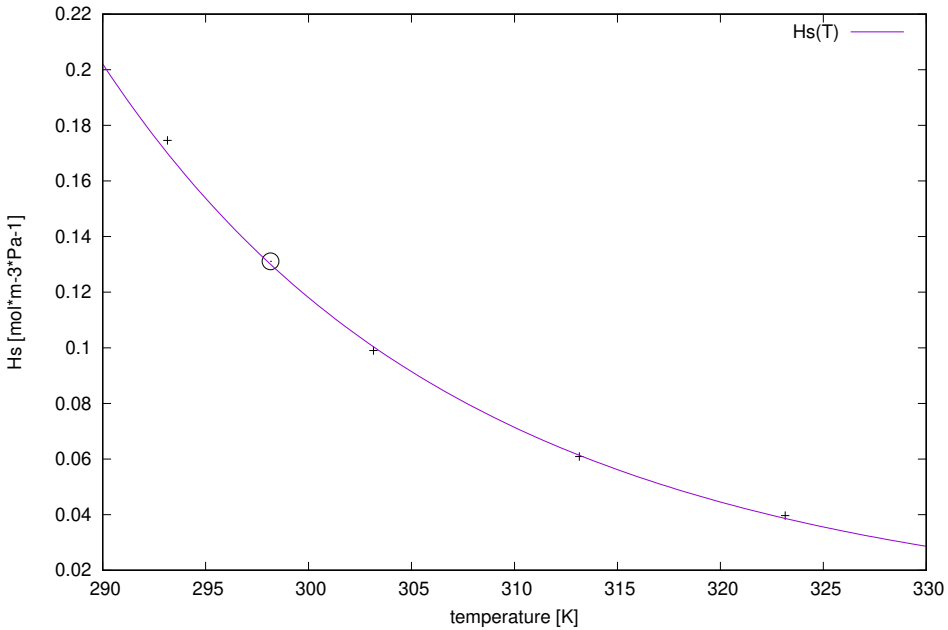

ref = 1996; chem = nitromethane; casrn = 75-52-5; r2 = 0.99946

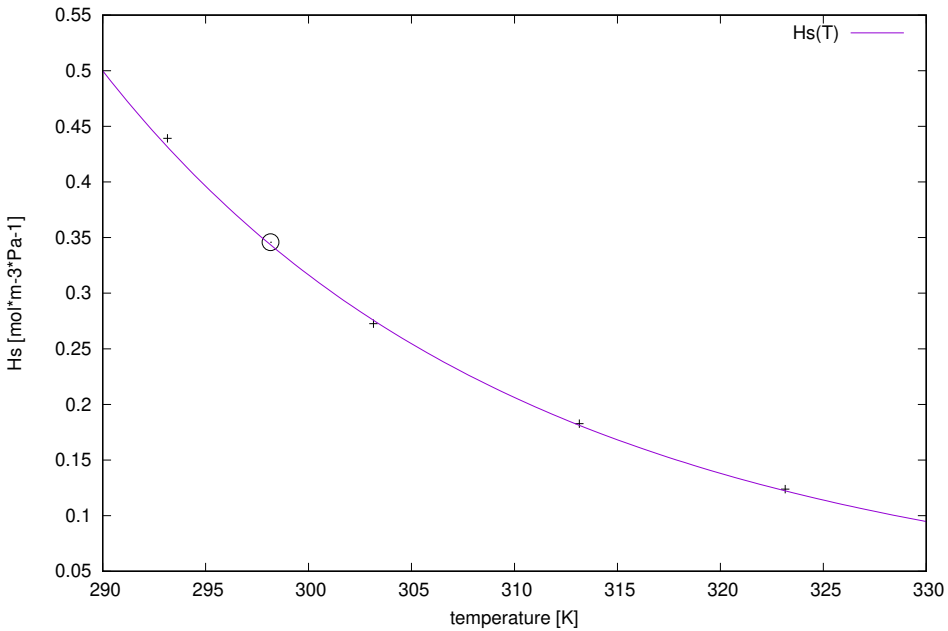

ref = 1996; chem = nitroethane; casrn = 79-24-3; r2 = 0.99932

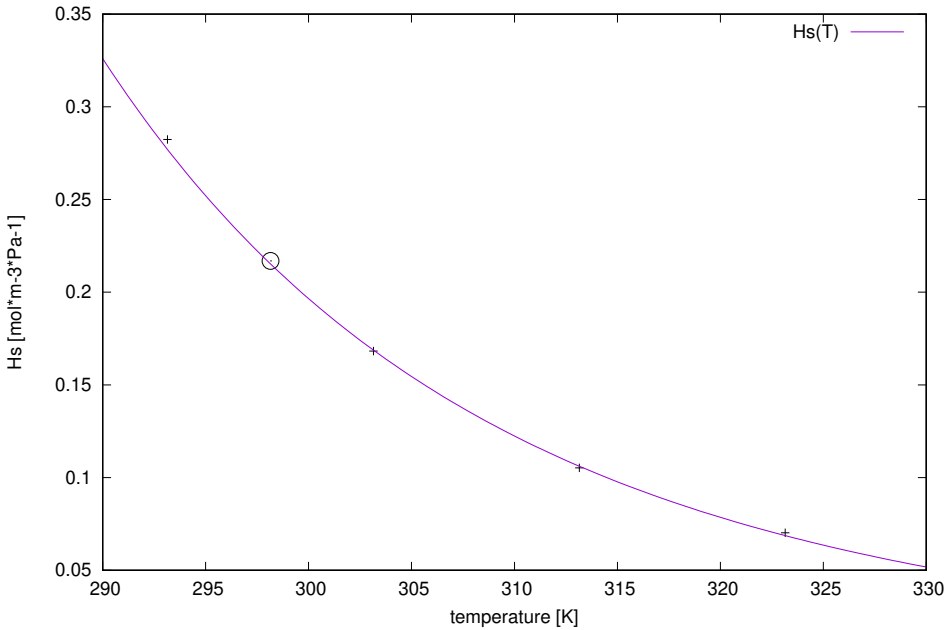

ref = 1996; chem = 2-nitropropane; casrn = 79-46-9; r2 = 0.99899

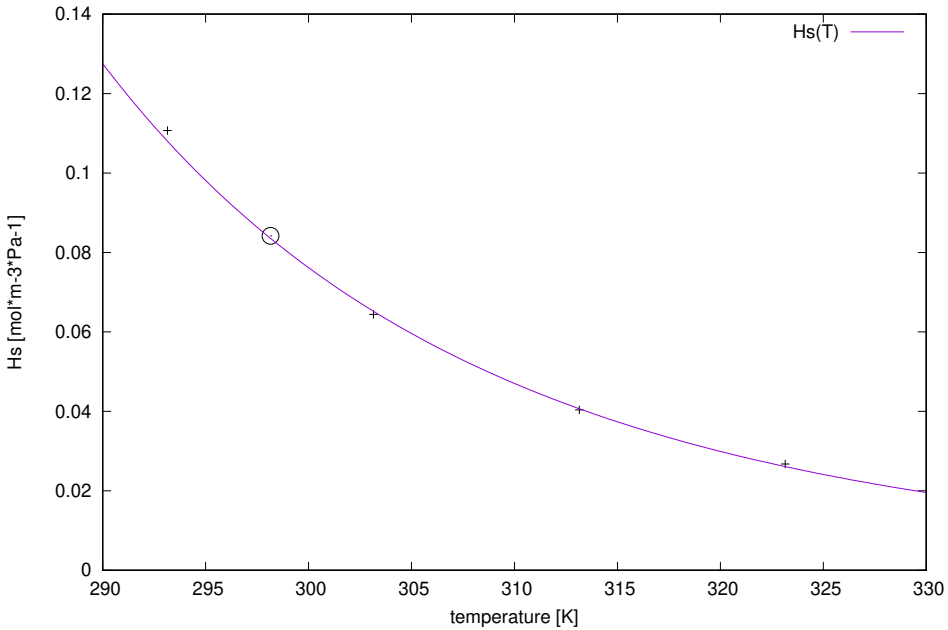



ref = 2013; chem = R1270; casrn = 115-07-1; r2 = 0.99998

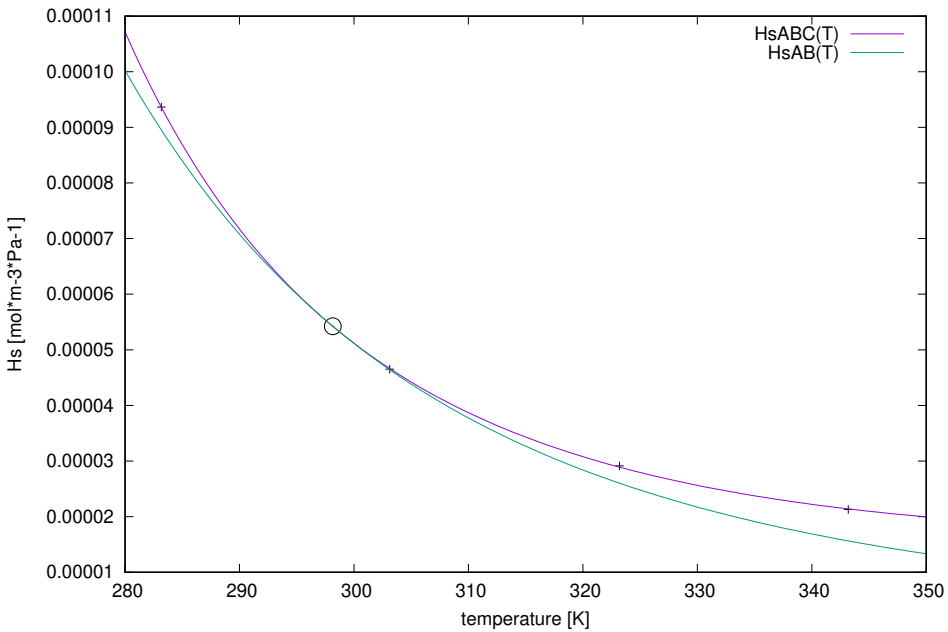

ref = 2013; chem = R124; casrn = 2837-89-0; r2 = 1.00000

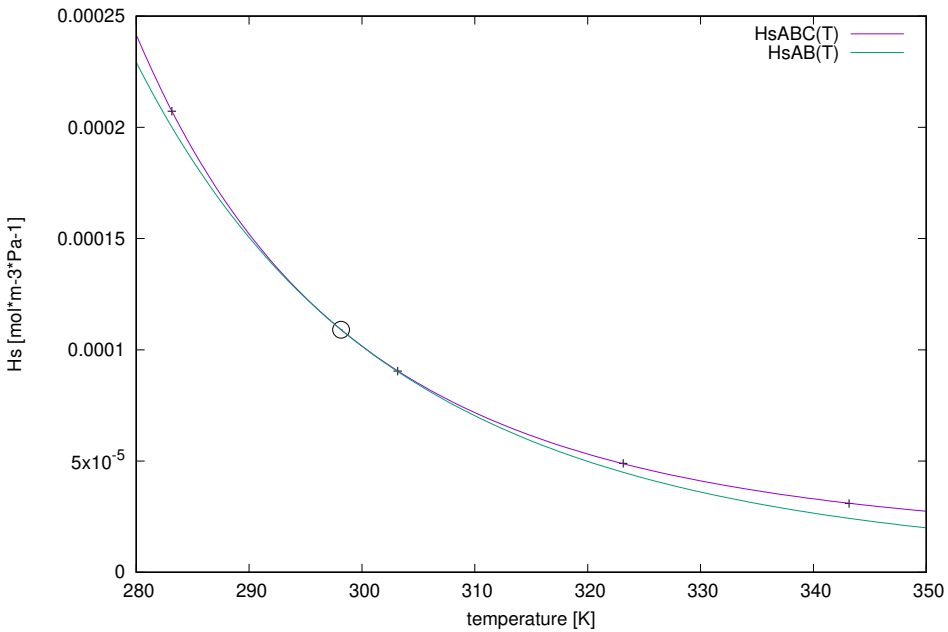

ref = 2013; chem = R125; casrn = 354-33-6; r2 = 0.99971

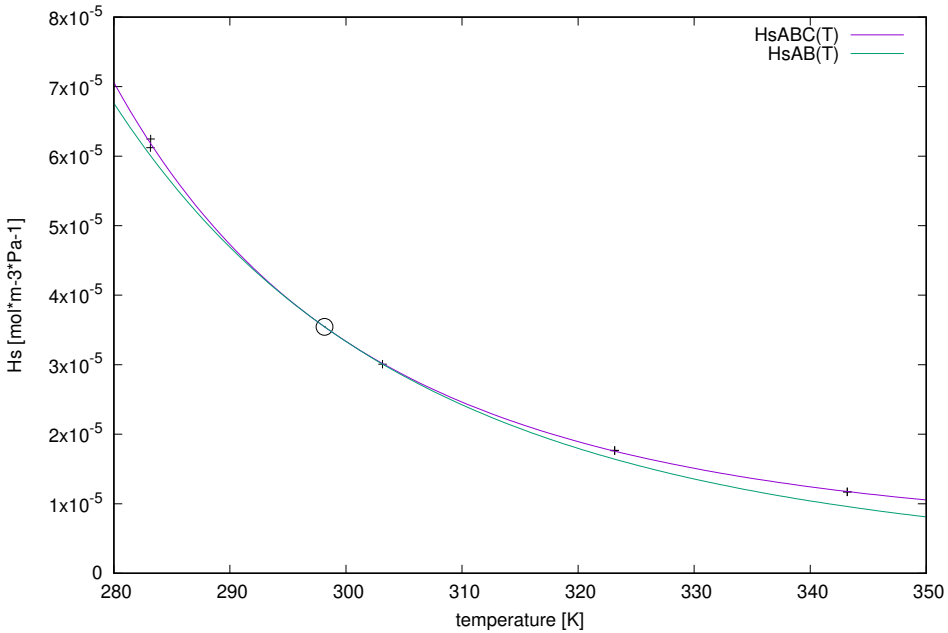

ref = 2013; chem = R1122; casrn = 359-10-4; r2 = 0.99990

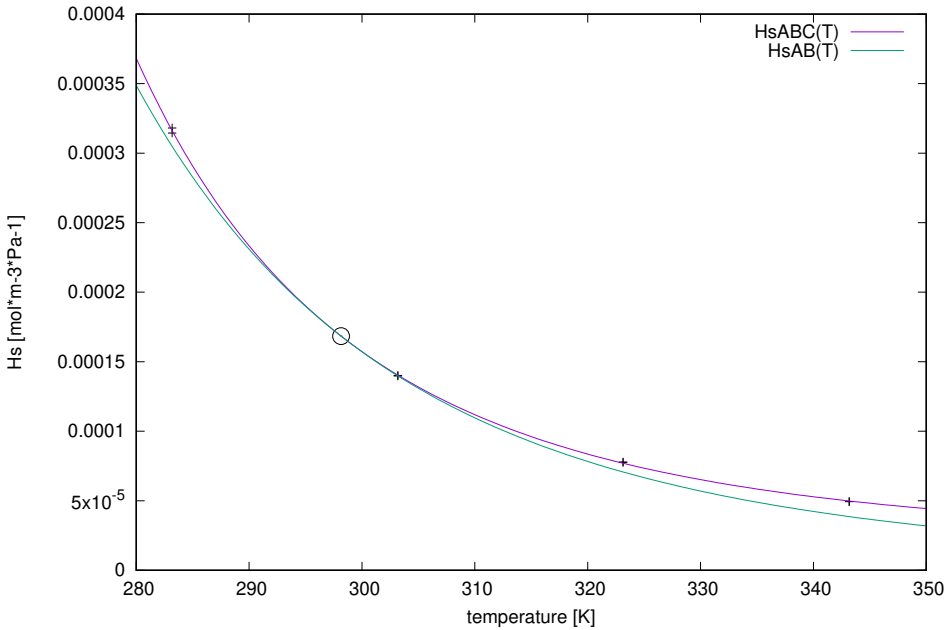

ref = 2013; chem = R227; casrn = 431-89-0; r2 = 0.99995

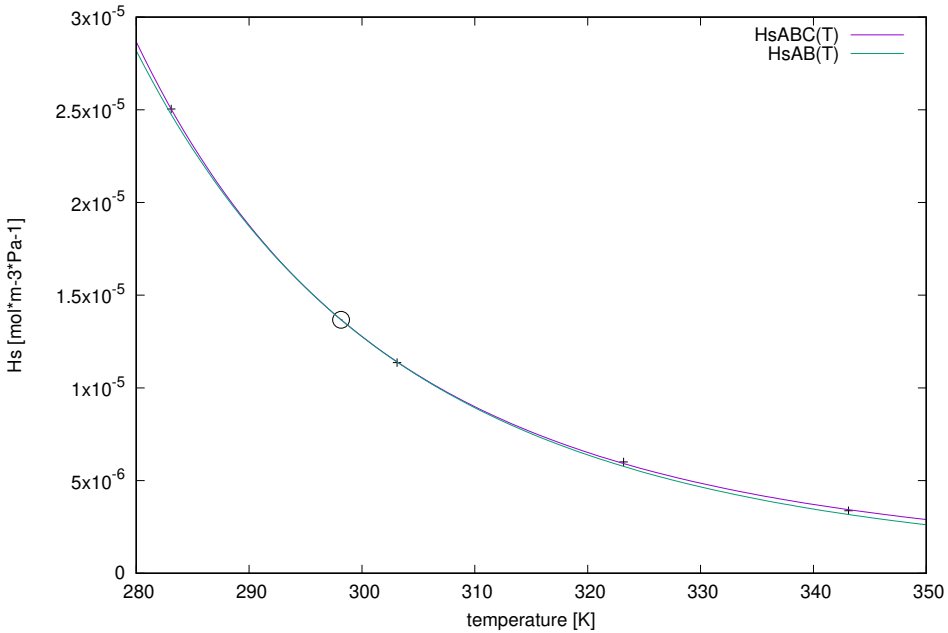

ref = 2013; chem = R50; casrn = 74-82-8; r2 = 0.99680

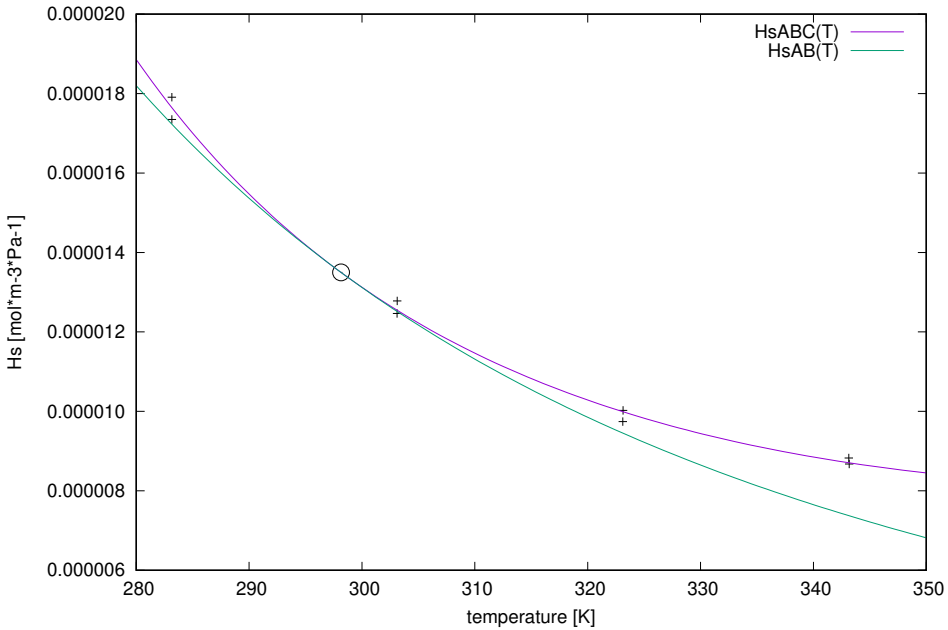

ref = 2013; chem = R170; casrn = 74-84-0; r2 = 0.99985

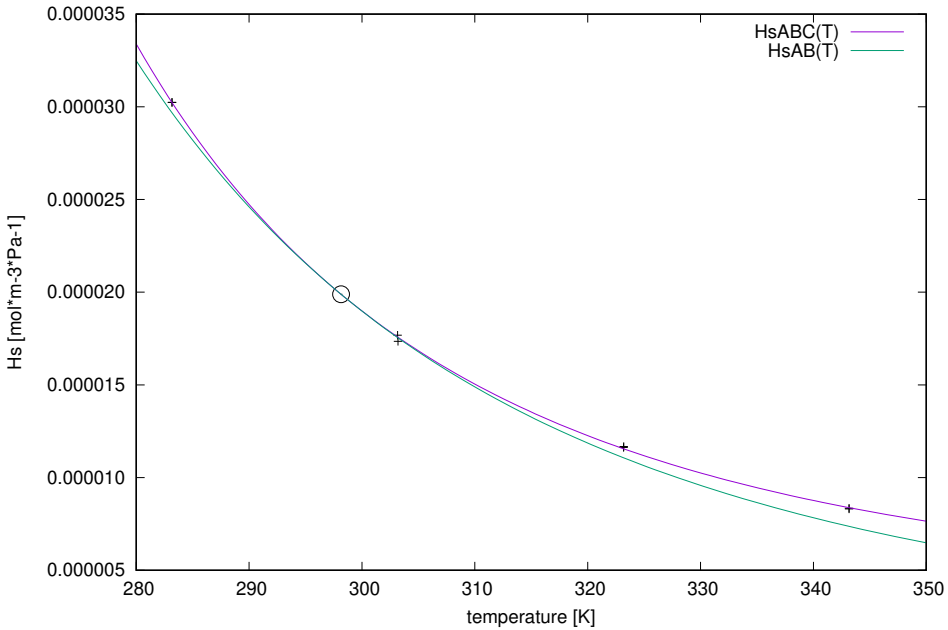

ref = 2013; chem = R1150; casrn = 74-85-1; r2 = 0.99999

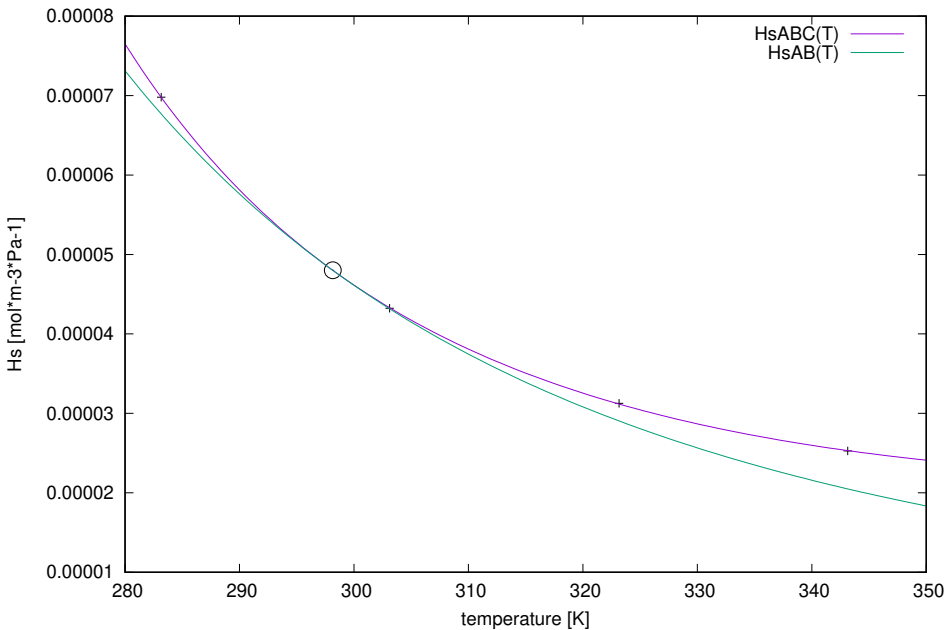



ref = 2013; chem = R40; casrn = 74-87-3; r2 = 0.99852

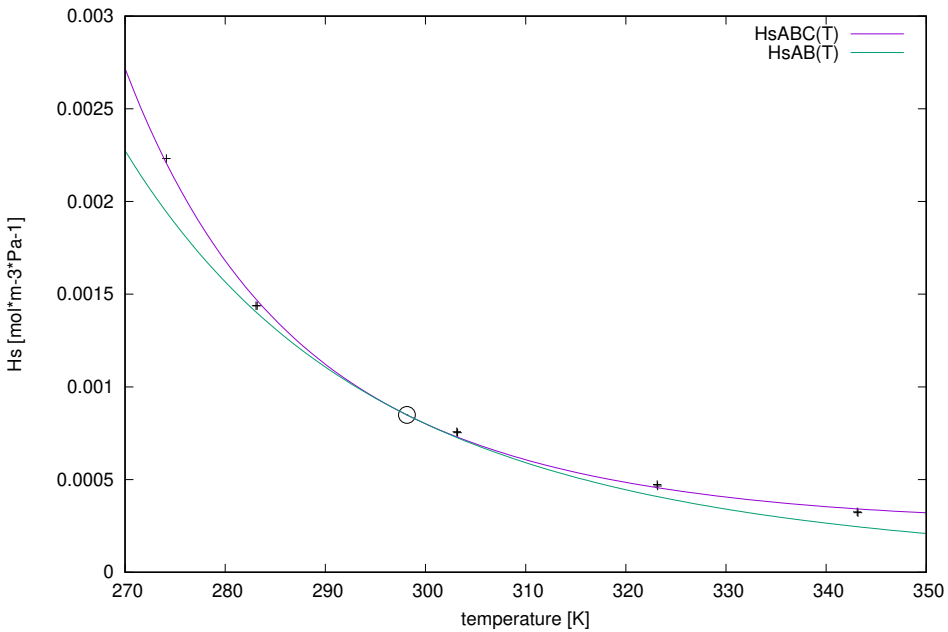

ref = 2013; chem = R290; casrn = 74-98-6; r2 = 1.00000

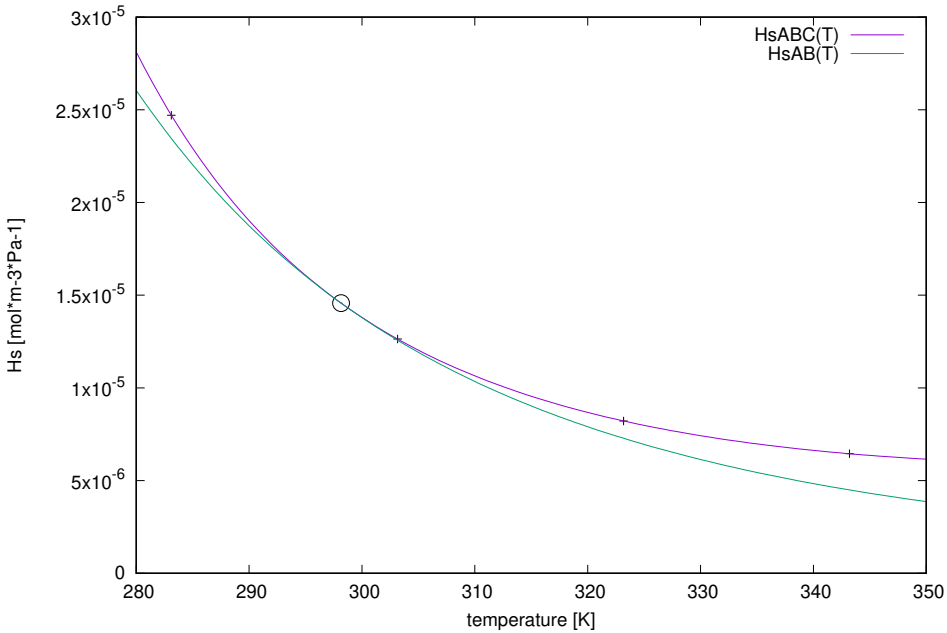

ref = 2013; chem = R160; casrn = 75-00-3; r2 = 0.99962

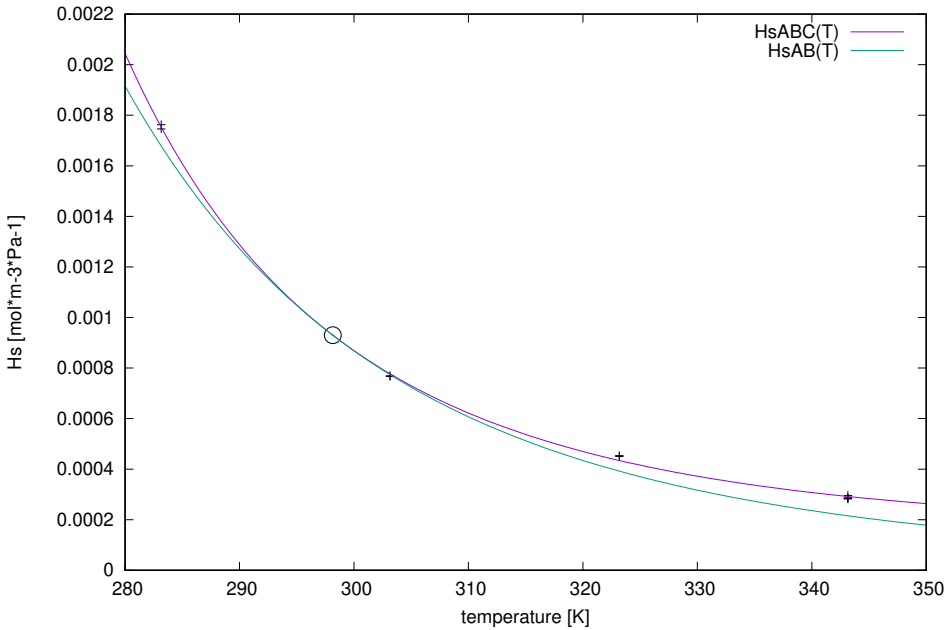

ref = 2013; chem = R32; casrn = 75-10-5; r2 = 1.00000

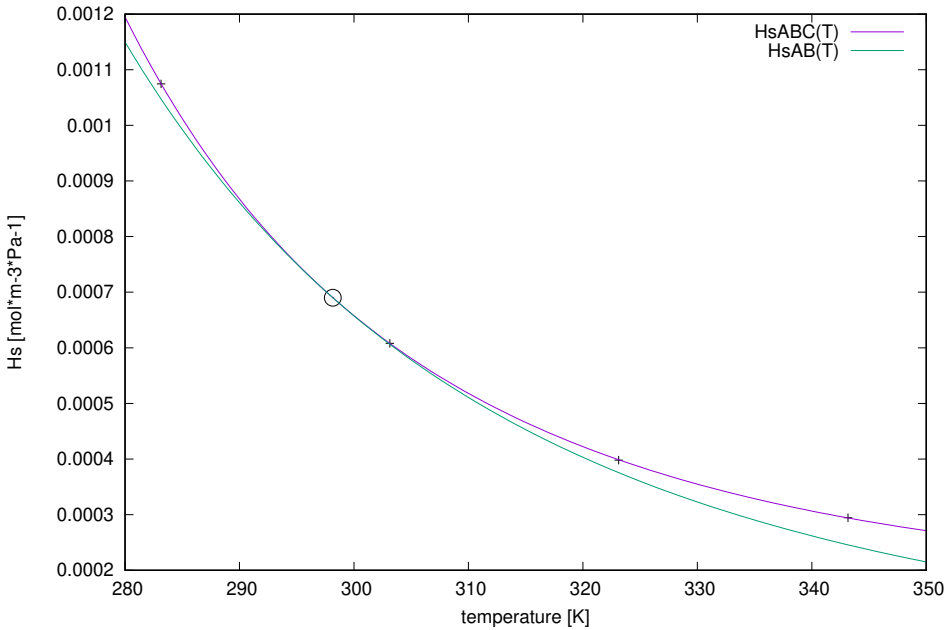

ref = 2013; chem = R152a; casrn = 75-37-6; r2 = 1.00000

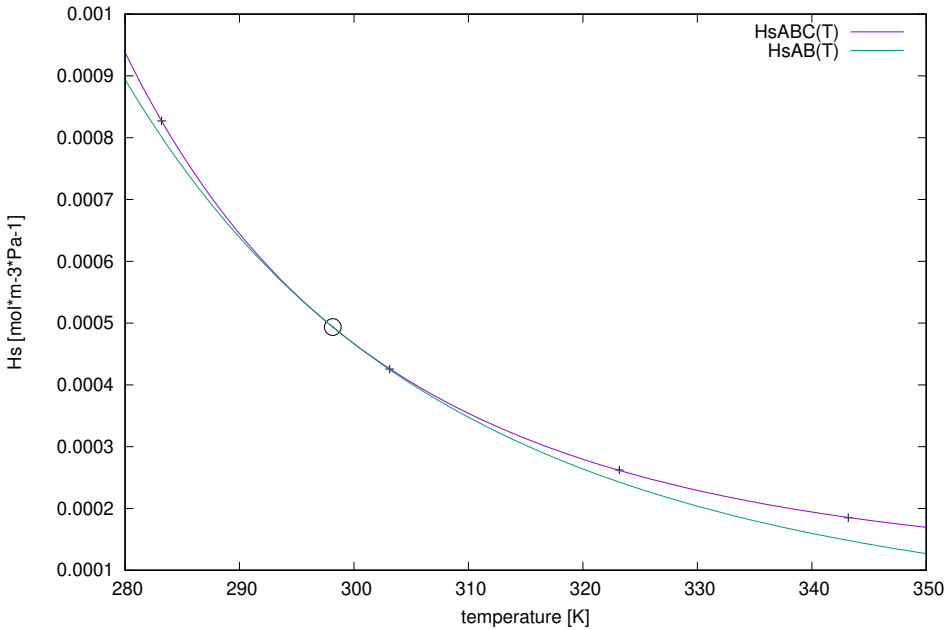

ref = 2013; chem = R22; casrn = 75-45-6; r2 = 0.99748

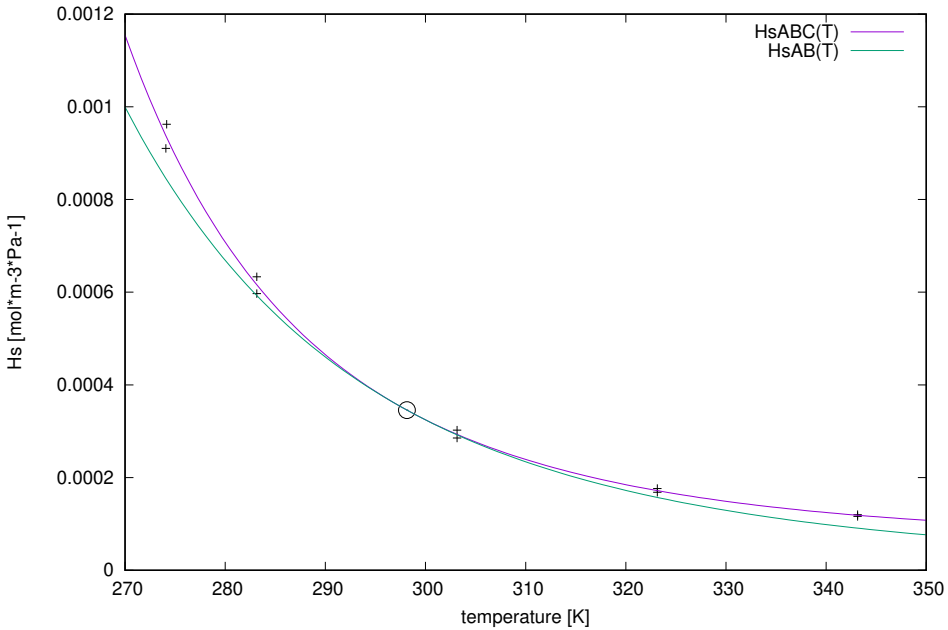

ref = 2013; chem = R142b; casrn = 75-68-3; r2 = 0.99876

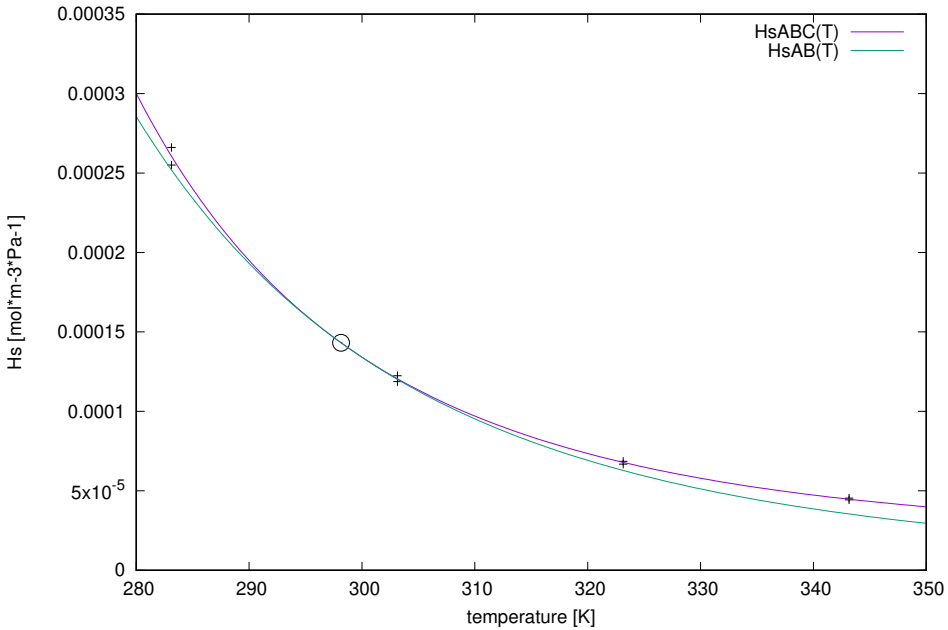

ref = 2013; chem = R11; casrn = 75-69-4; r2 = 0.99797

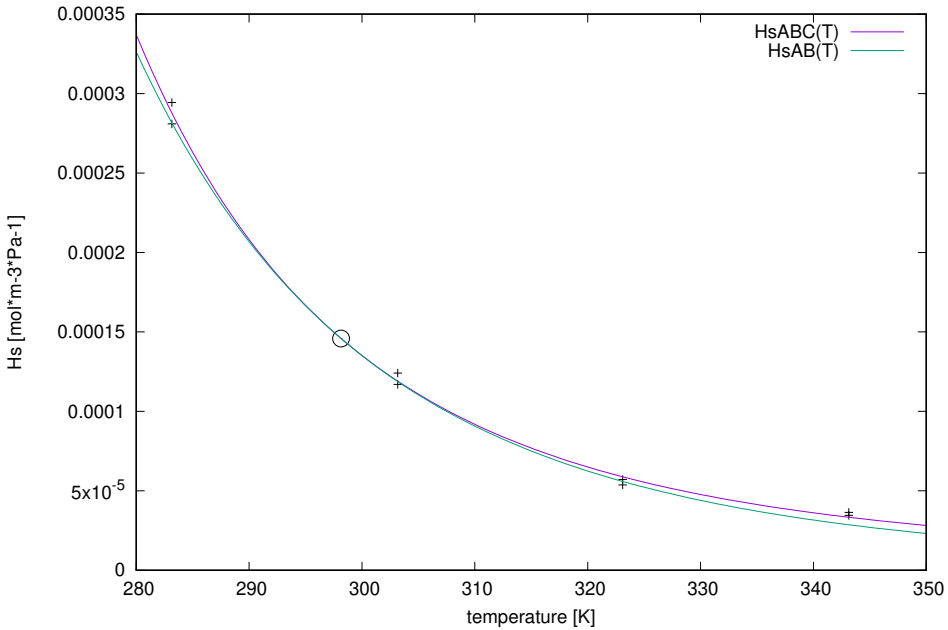



ref = 2013; chem = R12; casrn = 75-71-8; r2 = 0.99978

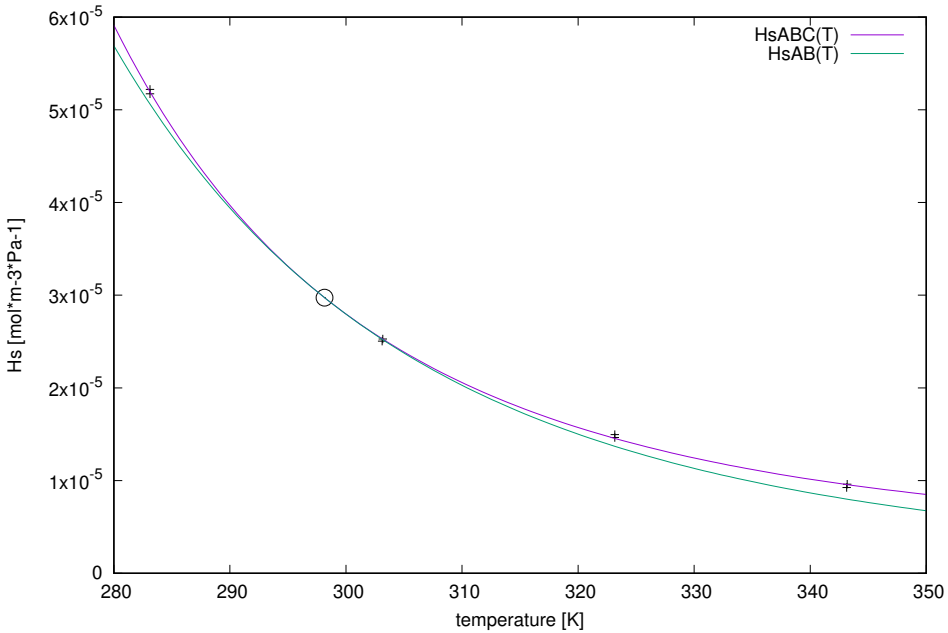

ref = 2013; chem = R13; casrn = 75-72-9; r2 = 0.99899

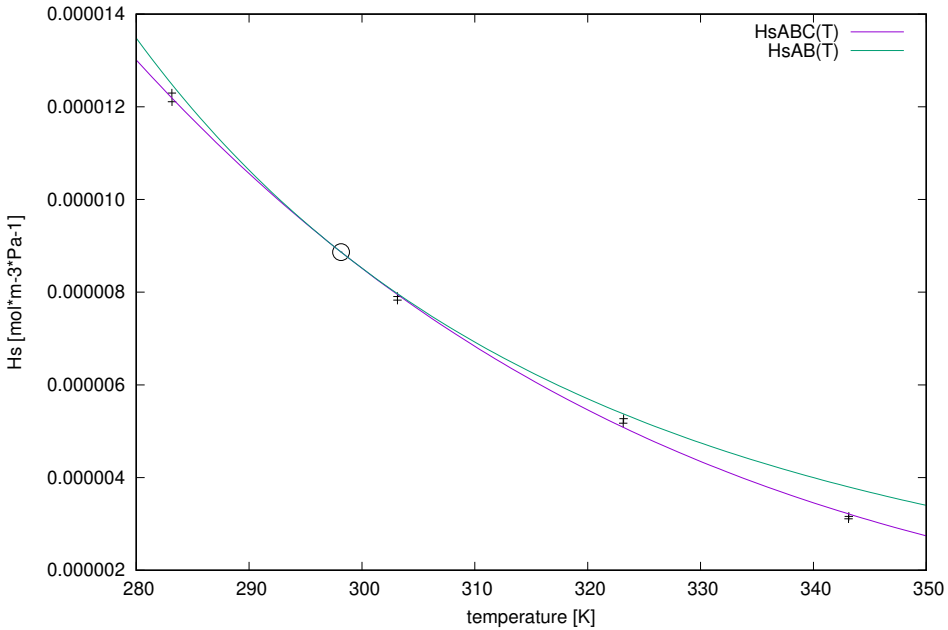

ref = 2013; chem = R14; casrn = 75-73-0; r2 = 0.99998

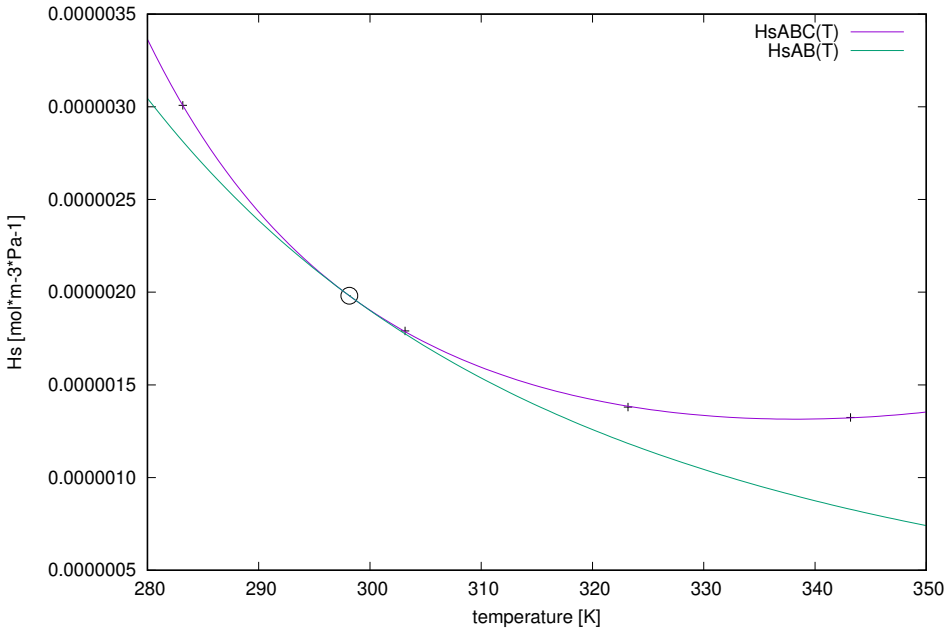

ref = 2013; chem = R133a; casrn = 75-88-7; r2 = 1.00000

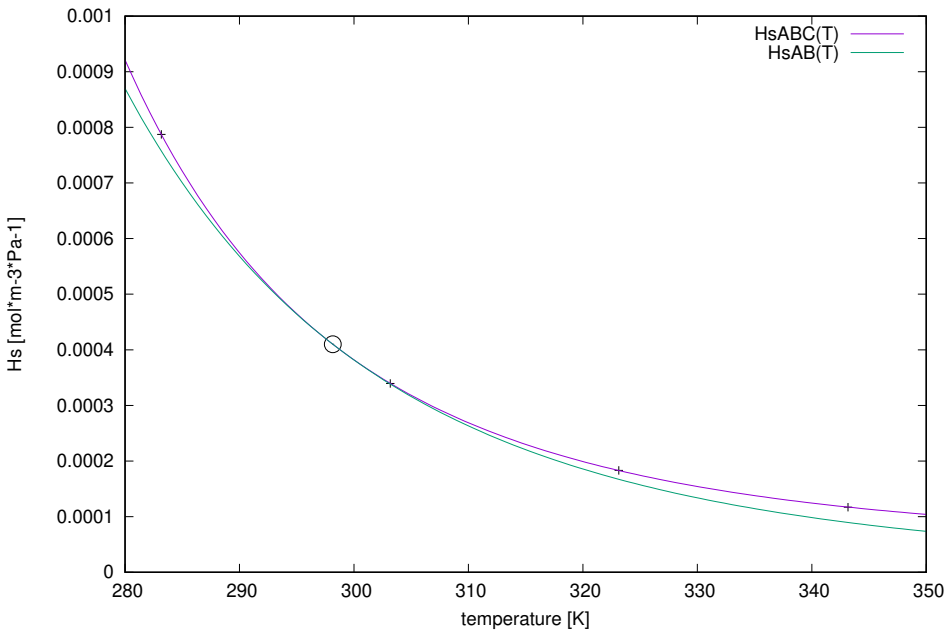

ref = 2013; chem = R113; casrn = 76-13-1; r2 = 1.00000

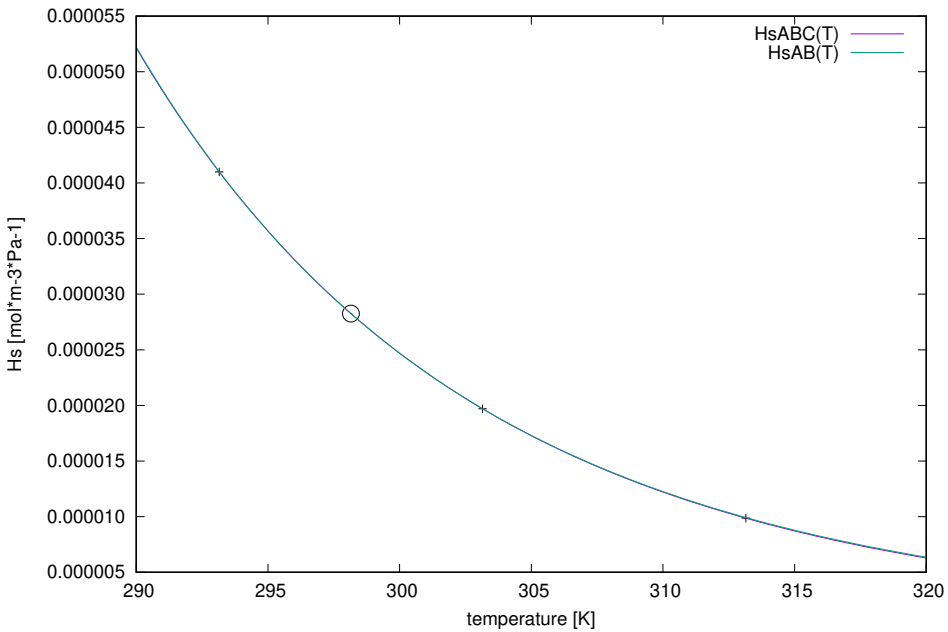

ref = 2013; chem = R114; casrn = 76-14-2; r2 = 0.99998

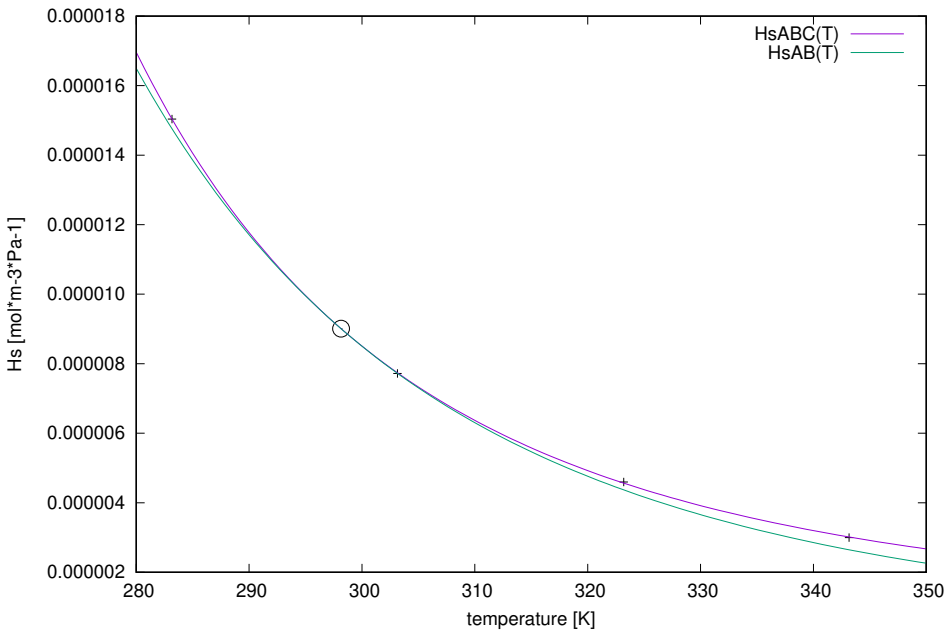

ref = 2013; chem = R115; casrn = 76-15-3; r2 = 0.99977

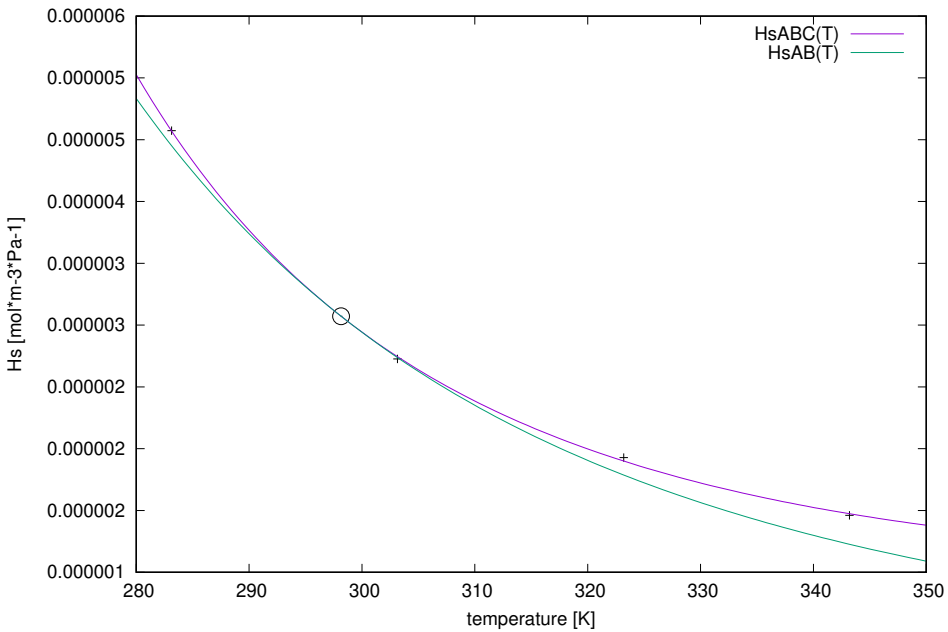

ref = 2013; chem = R134a; casrn = 811-97-2; r2 = 0.99999

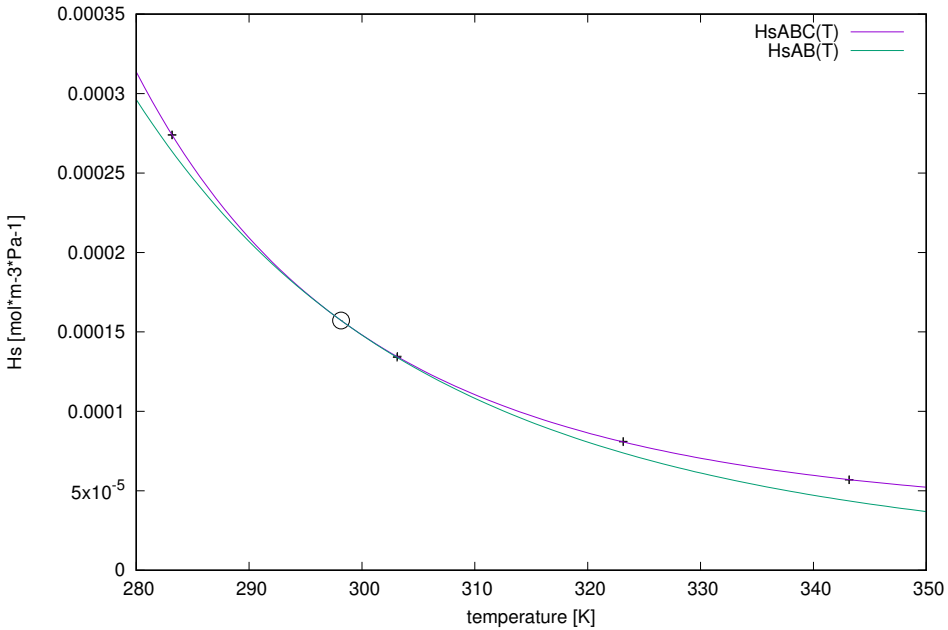



ref = 2121; chem = 2,2-dichloro-1,1,1-trifluoroethane; casrn = 306-83-2; r2 = 0.98783

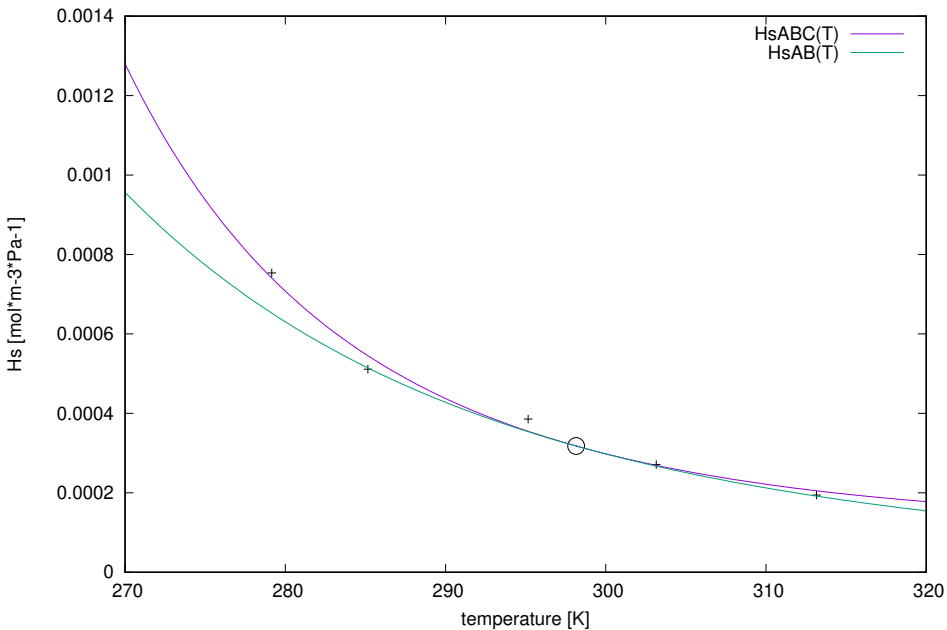

ref = 2121; chem = chlorodifluoromethane; casrn = 75-45-6; r2 = 0.97181

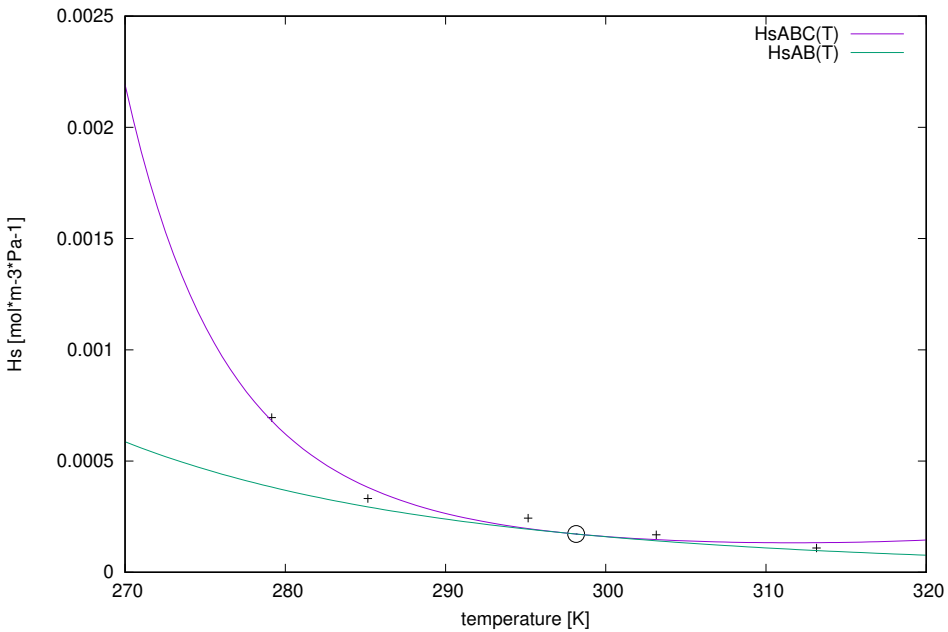

ref = 2121; chem = 1-chloro-1,1-difluoroethane; casrn = 75-68-3; r2 = 0.99926

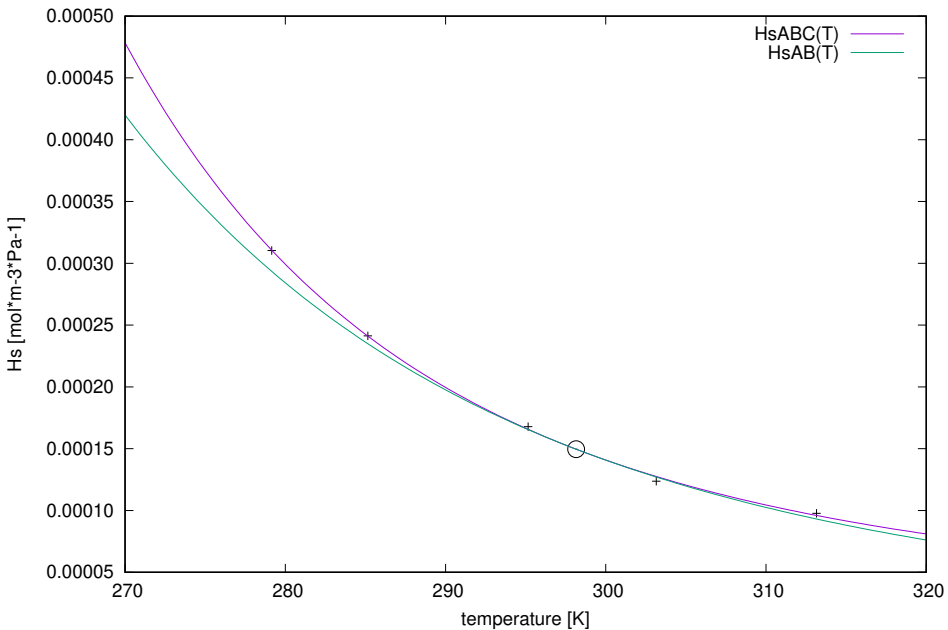

ref = 2121; chem = 1,1,1,2-tetrafluoroethane; casrn = 811-97-2; r2 = 0.99890

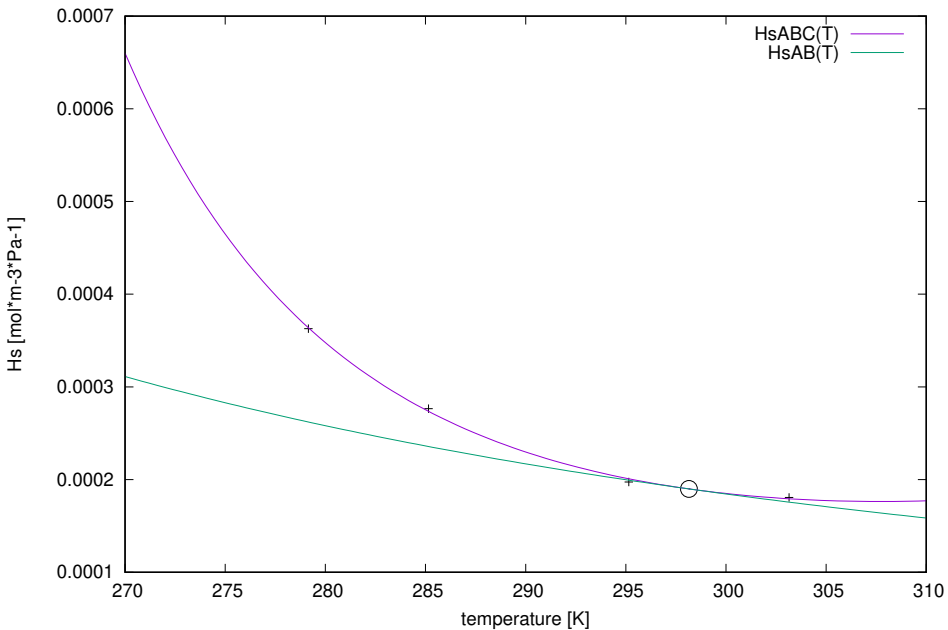

ref = 2122; chem = 1,8-dichlorooctane; casrn = 2162-99-4; r2 = 1.00000

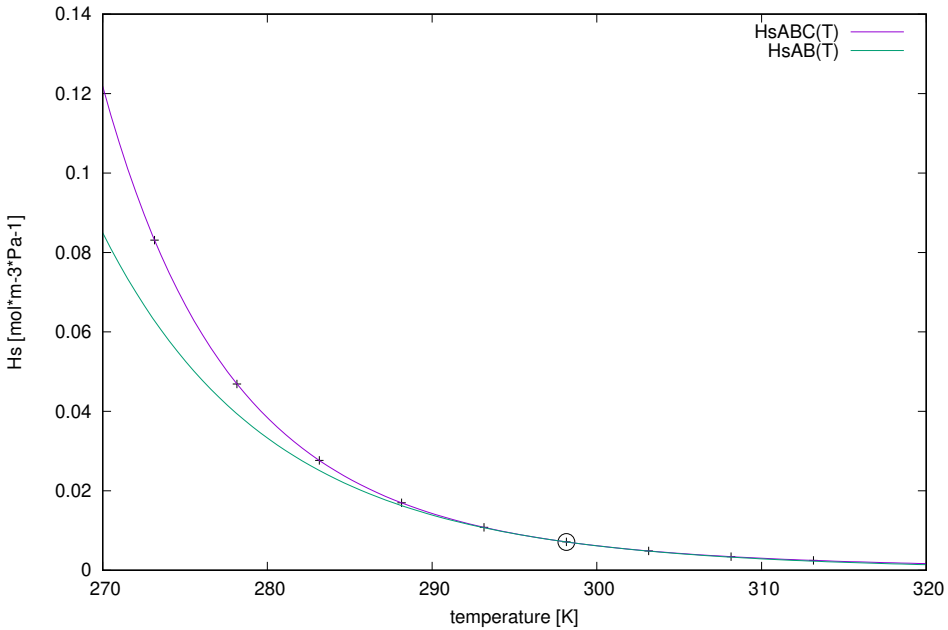

ref = 2122; chem = 1,8-dibromooctane; casrn = 4549-32-0; r2 = 1.00000

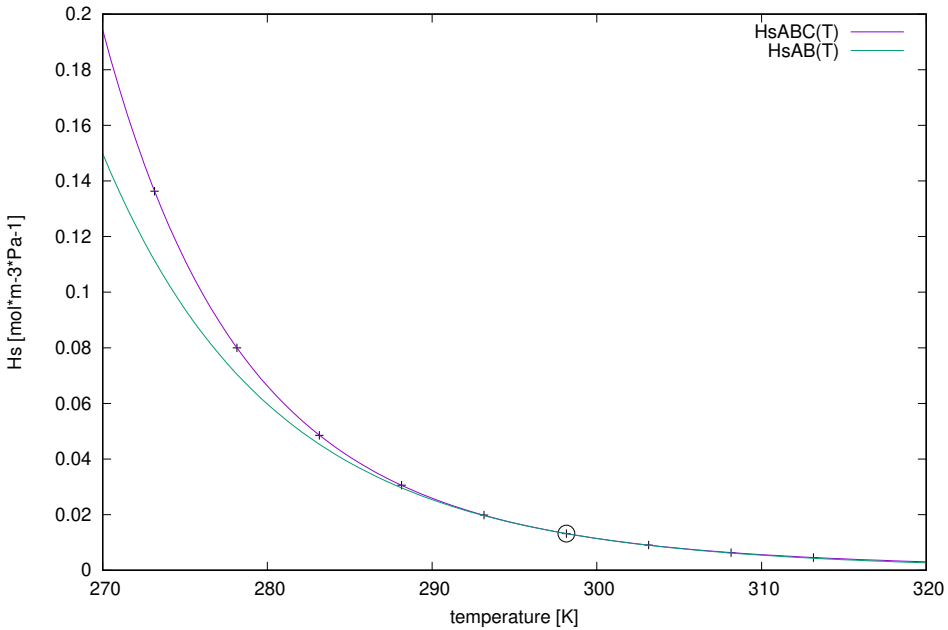

ref = 2171; chem = dimethylmercury; casrn = 593-74-8; r2 = 1.00000

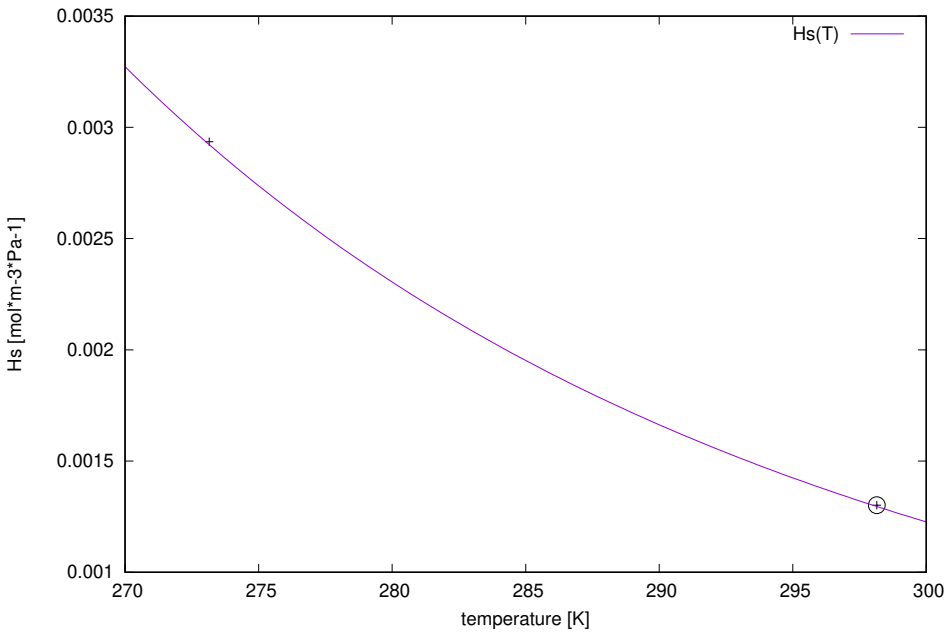

ref = 2171; chem = mercury; casrn = 7439-97-6; r2 = 1.00000

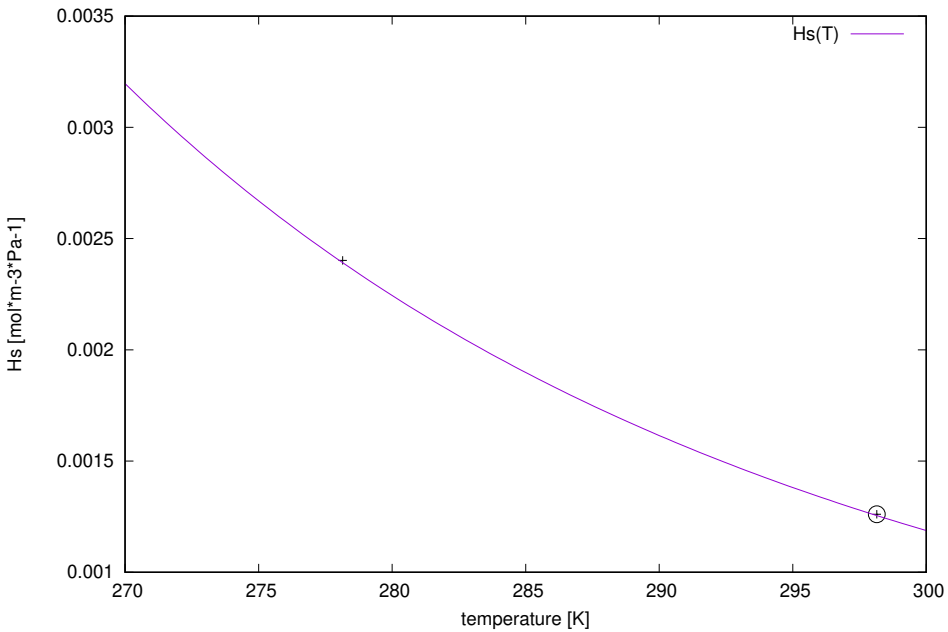



ref = 2203; chem = sulfuryl fluoride; casrn = 2699-79-8; r2 = 1.00000

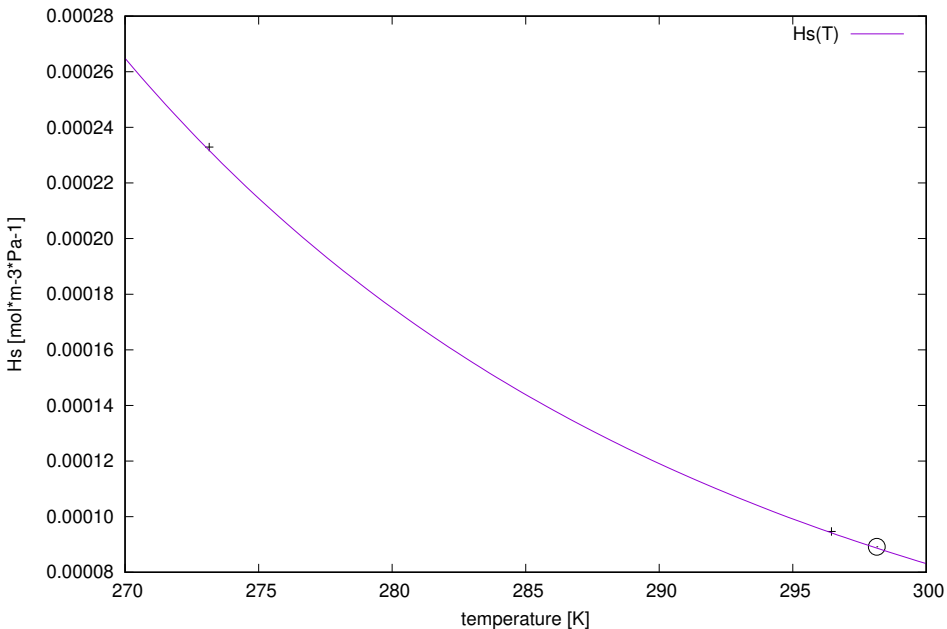

ref = 2216; chem = alpha-HCH; casrn = 319-84-6; r2 = 0.99953

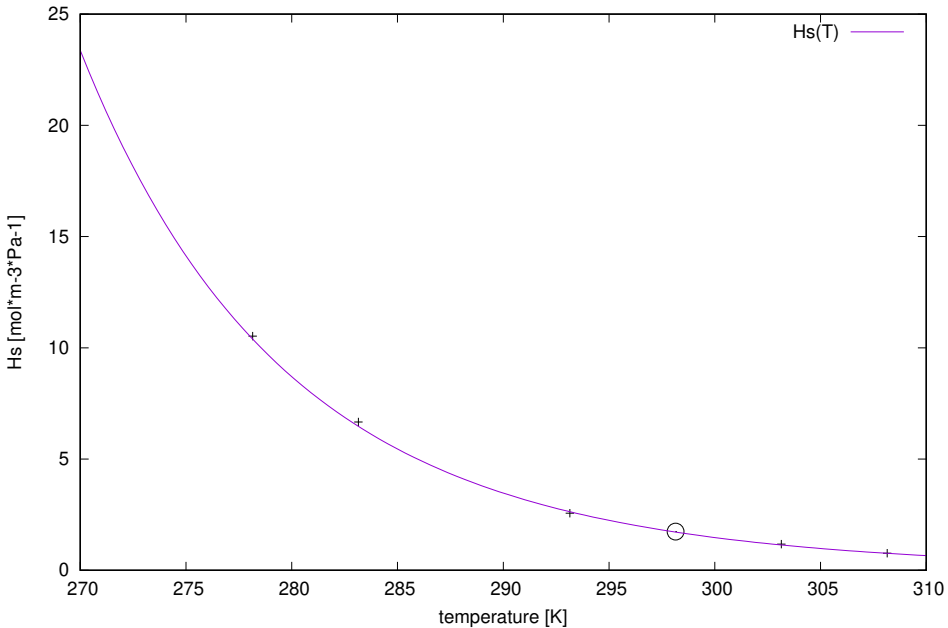

ref = 2216; chem = beta-HCH; casrn = 319-85-7; r2 = 0.99881

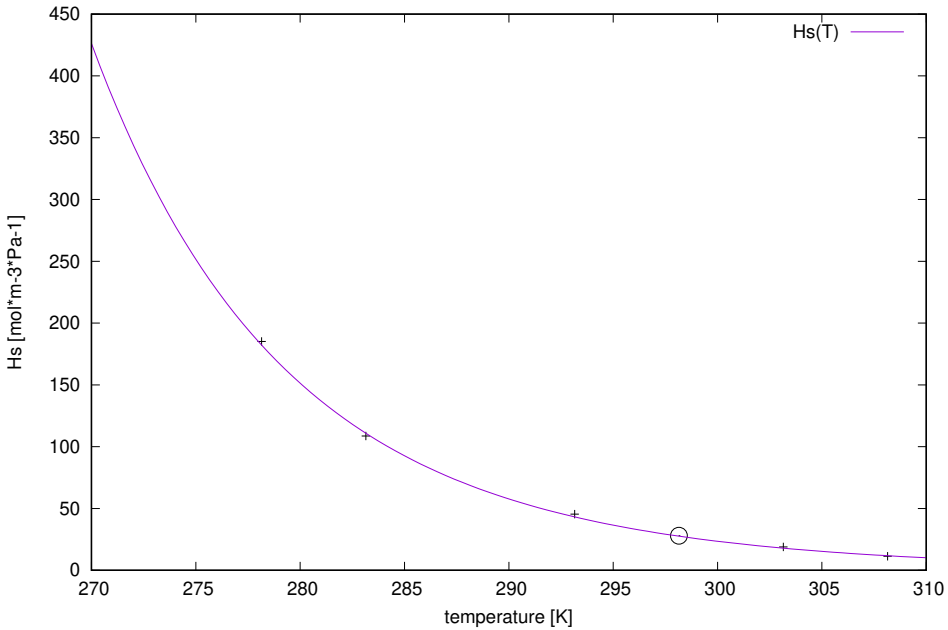

ref = 2216; chem = gamma-HCH; casrn = 58-89-9; r2 = 0.99491

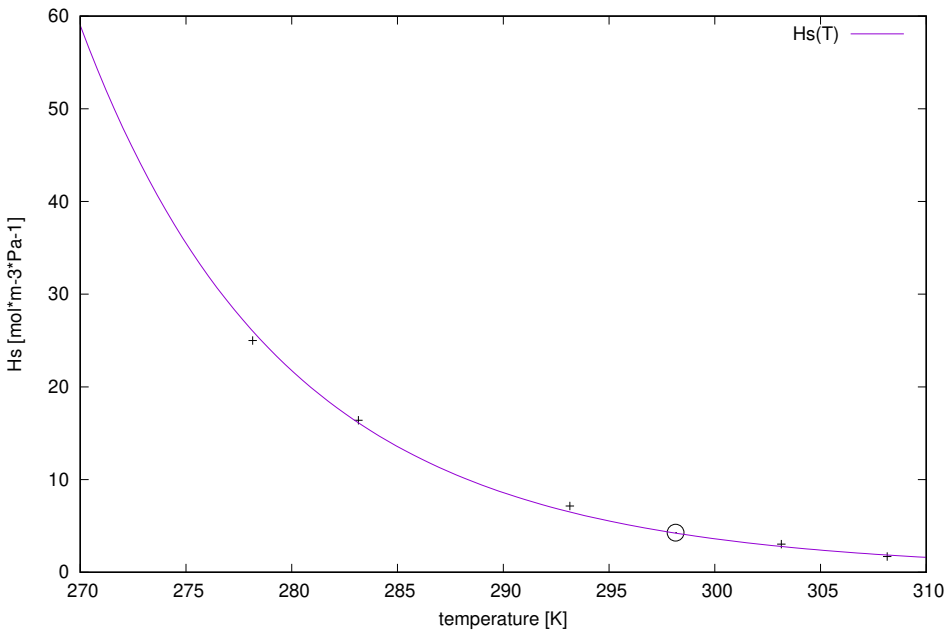

ref = 2222; chem = fluoromethane; casrn = 593-53-3; r2 = 0.99986

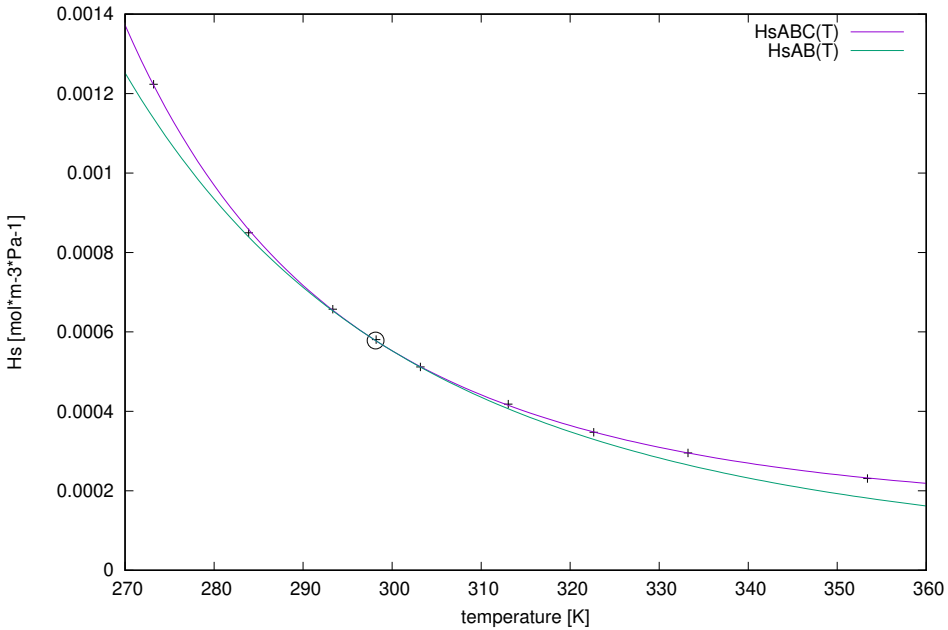

ref = 2222; chem = bromomethane; casrn = 74-83-9; r2 = 0.99962

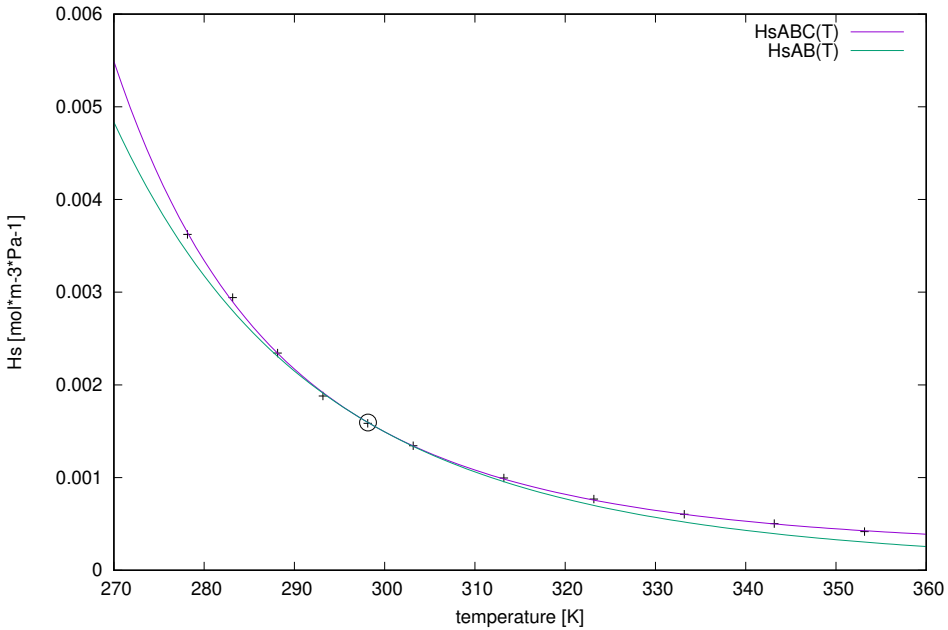

ref = 2222; chem = chloromethane; casrn = 74-87-3; r2 = 0.99994

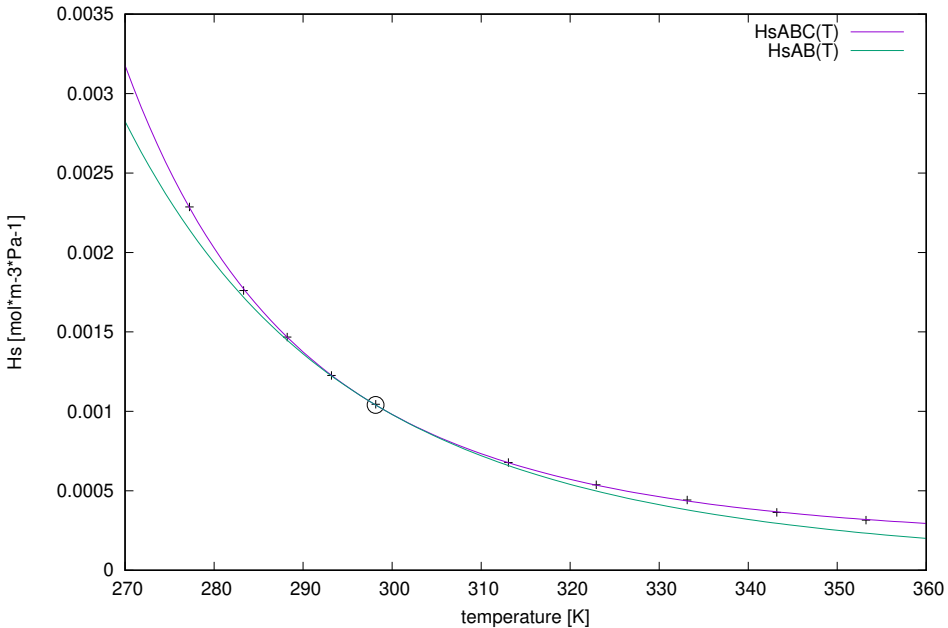

ref = 2222; chem = iodomethane; casrn = 74-88-4; r2 = 0.99869

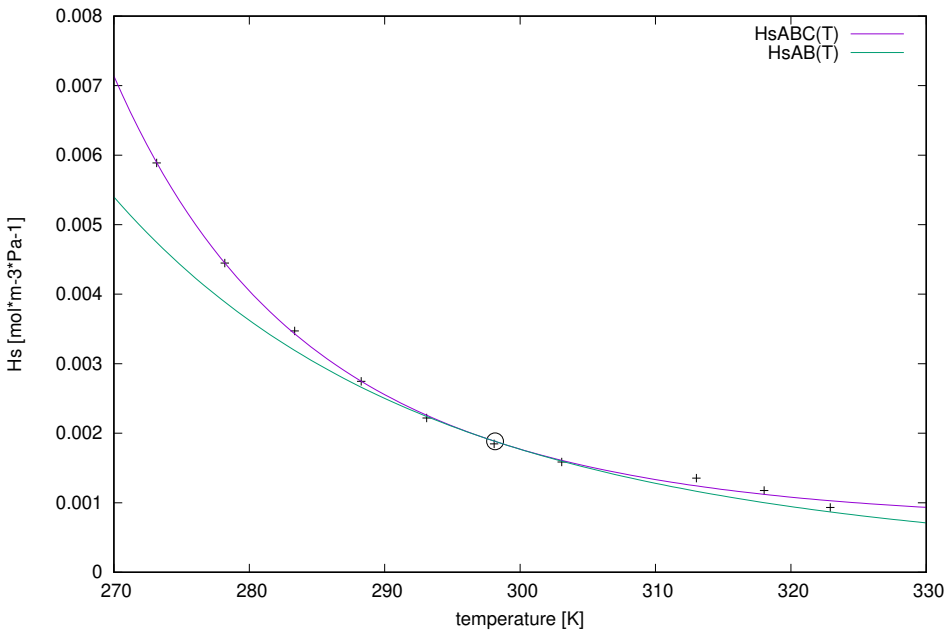



ref = 2288; chem = chloromethylmercury; casrn = 115-09-3; r2 = 0.51174

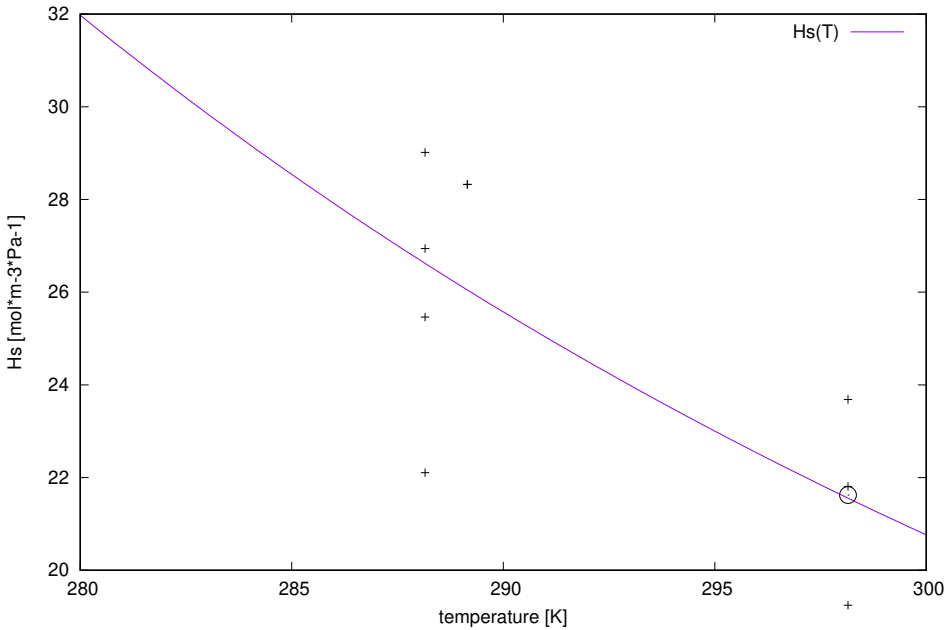

ref = 2289; chem = dimethylmercury; casrn = 593-74-8; r2 = 1.00000



ref = 2290; chem = mercury dihydroxide; casrn = 12135-13-6; r2 = 1.00000

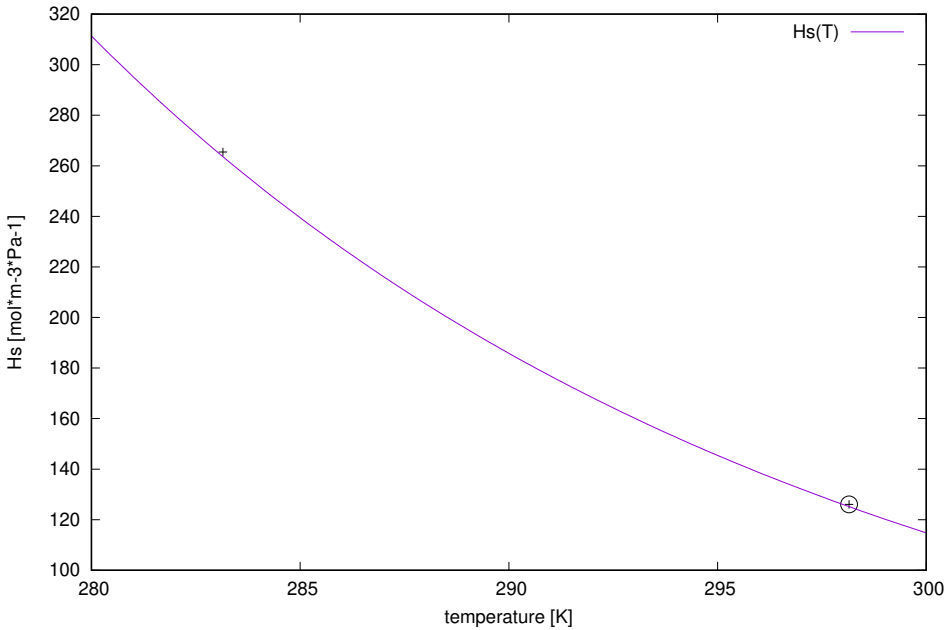

ref = 2290; chem = mercury dichloride; casrn = 7487-94-7; r2 = 1.00000

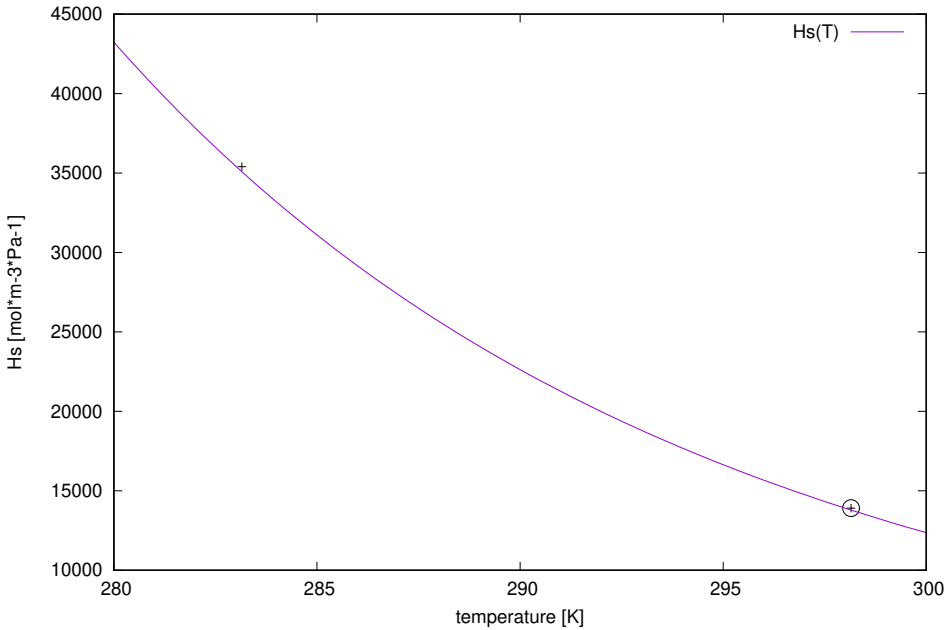

ref = 2431; chem = diisopropyl ether; casrn = 108-20-3; r2 = 1.00000

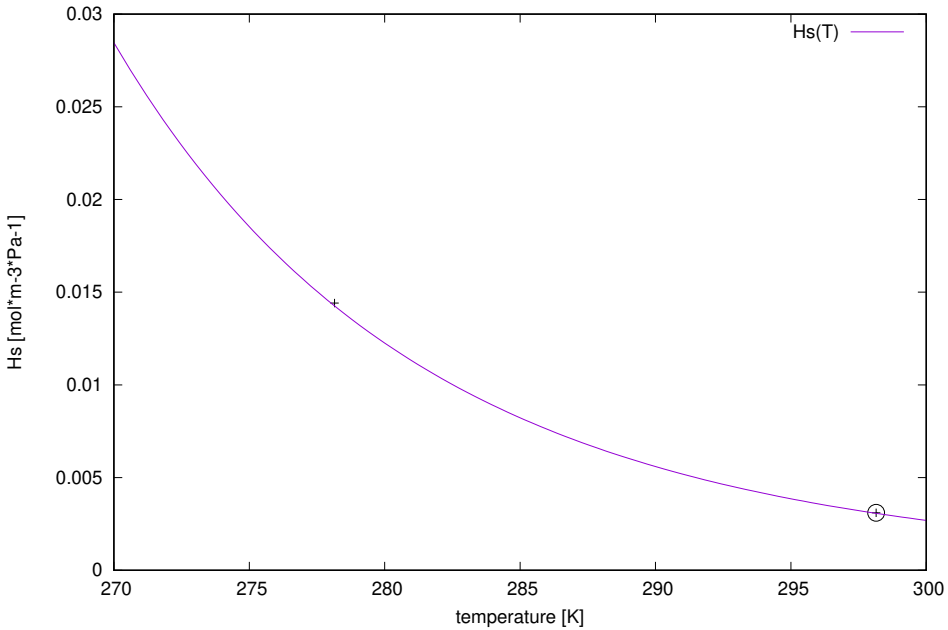

ref = 2431; chem = ethyl tert-butyl ether; casrn = 637-92-3; r2 = 1.00000

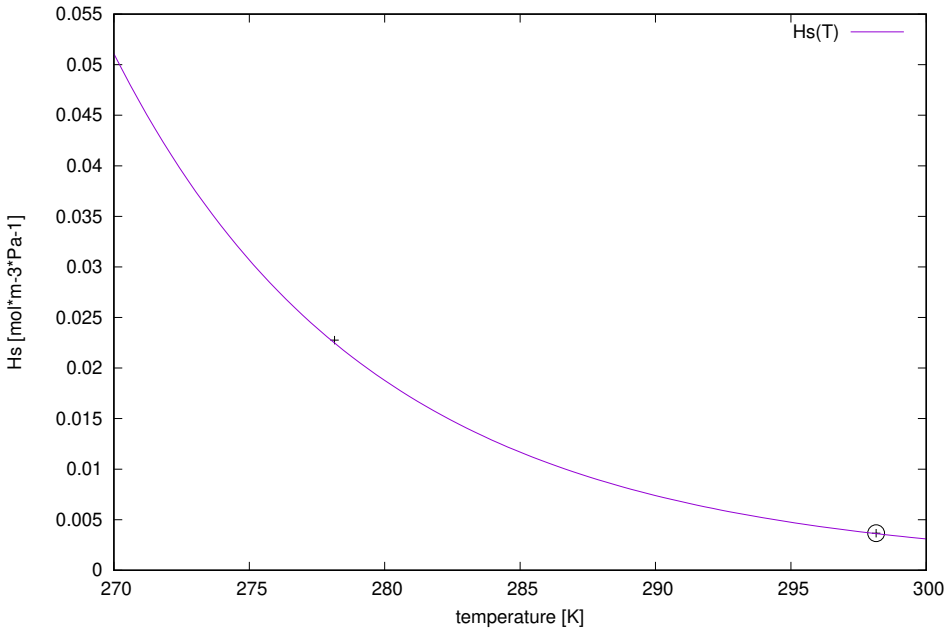

ref = 2431; chem = 2-methyl-2-propanol; casrn = 75-65-0; r2 = 1.00000

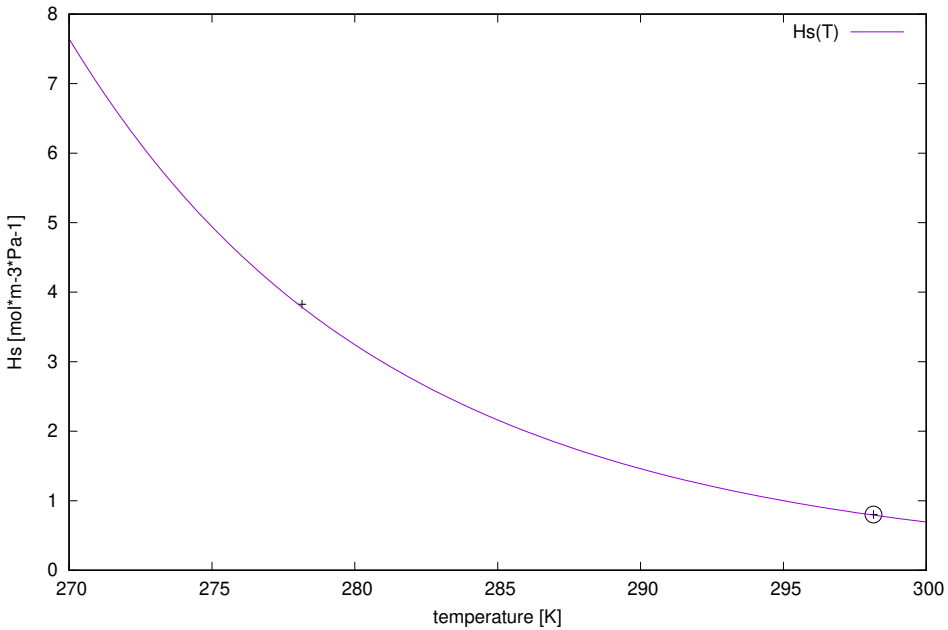

ref = 2431; chem = 2-methoxy-2-methylbutane; casrn = 994-05-8; r2 = 1.00000

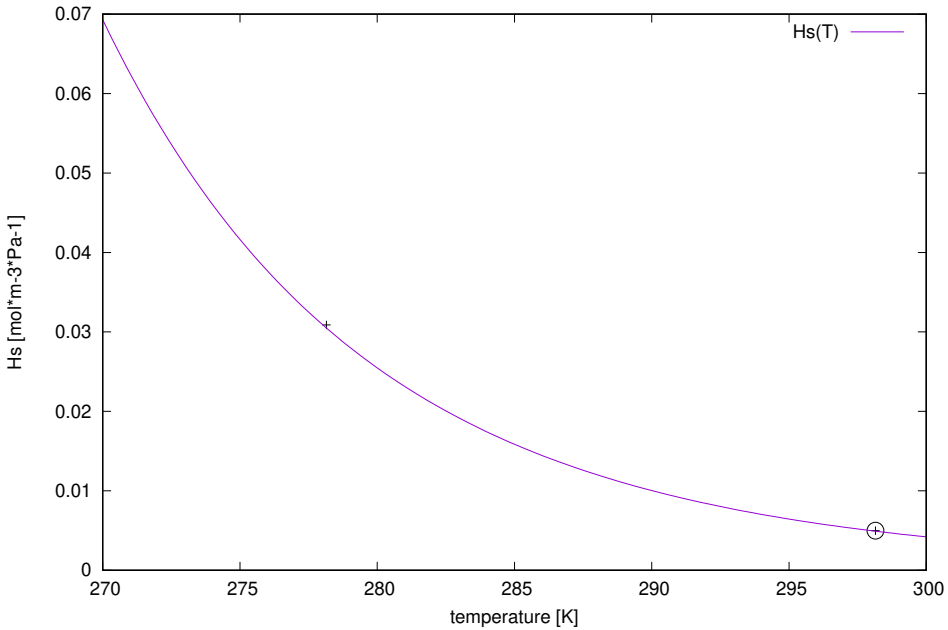



ref = 2434; chem = nitrogen; casrn = 7727-37-9; r2 = 0.99998

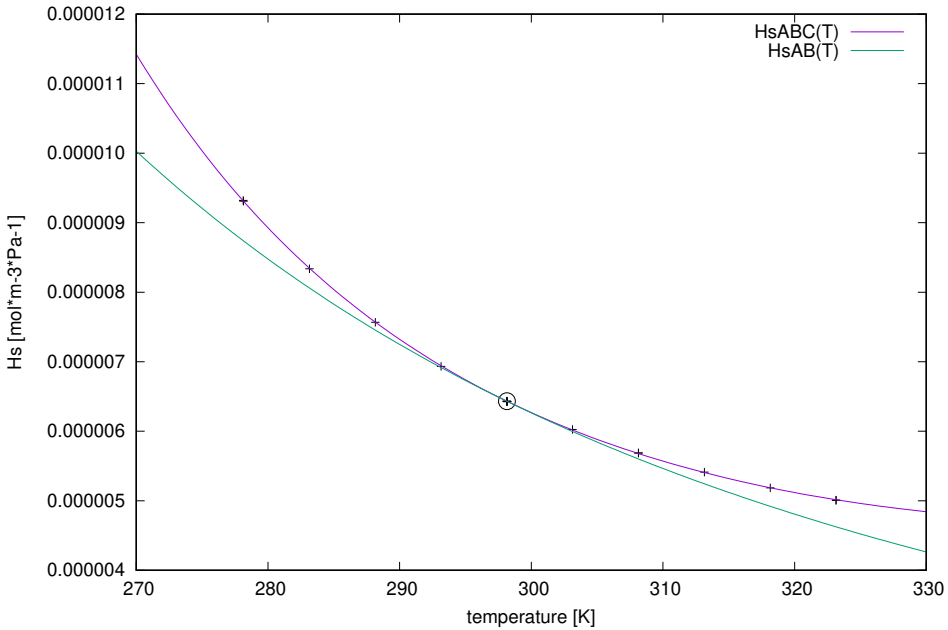

ref = 2435; chem = argon; casrn = 7440-37-1; r2 = 0.99995

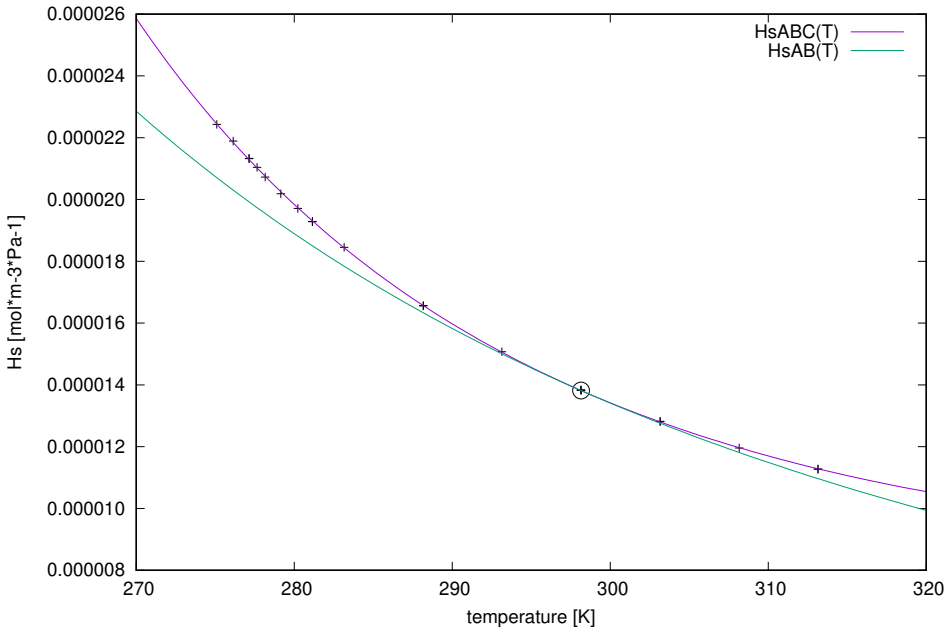

ref = 2445; chem = 1-bromo-1-chloro-2,2,2-trifluoroethane; casrn = 151-67-7; r2 = 0.99998

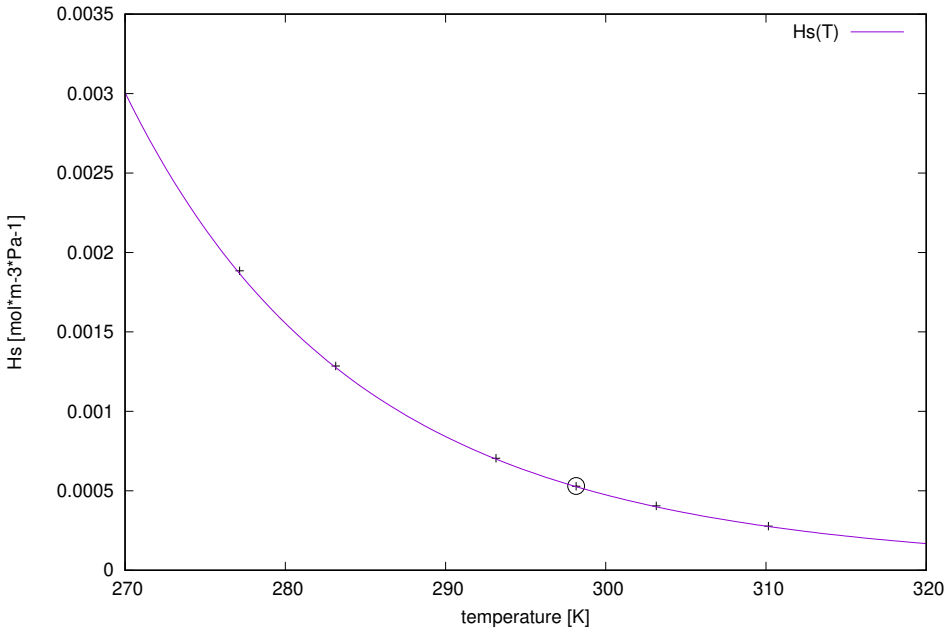

ref = 2445; chem = 1-chloro-2,2,2-trifluoroethyl difluoromethyl ether; casrn = 26675-46-7; r2 = 1.00000

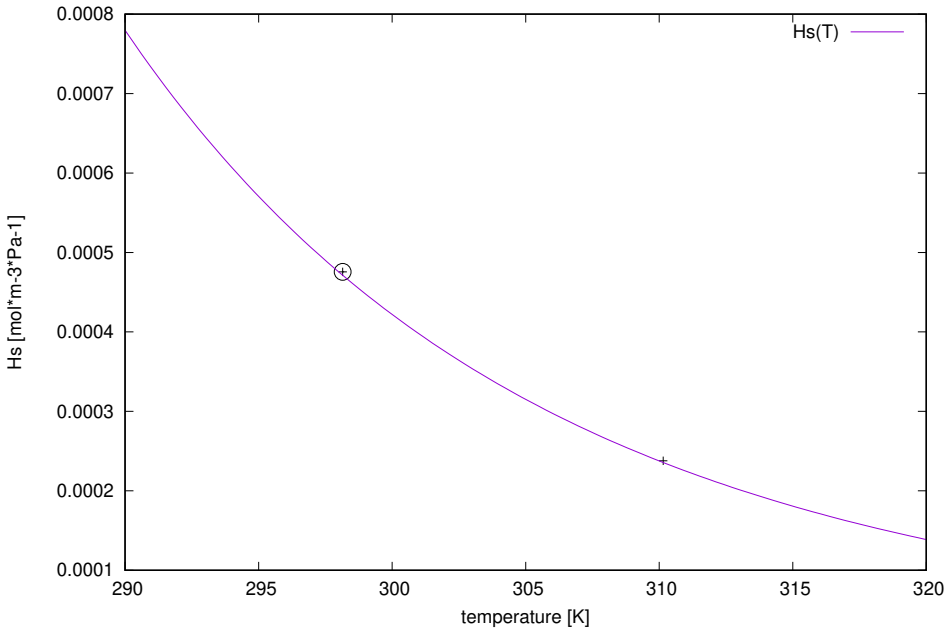

ref = 2445; chem = (2,2,2-trifluoroethoxy)-ethene; casrn = 406-90-6; r2 = 1.00000

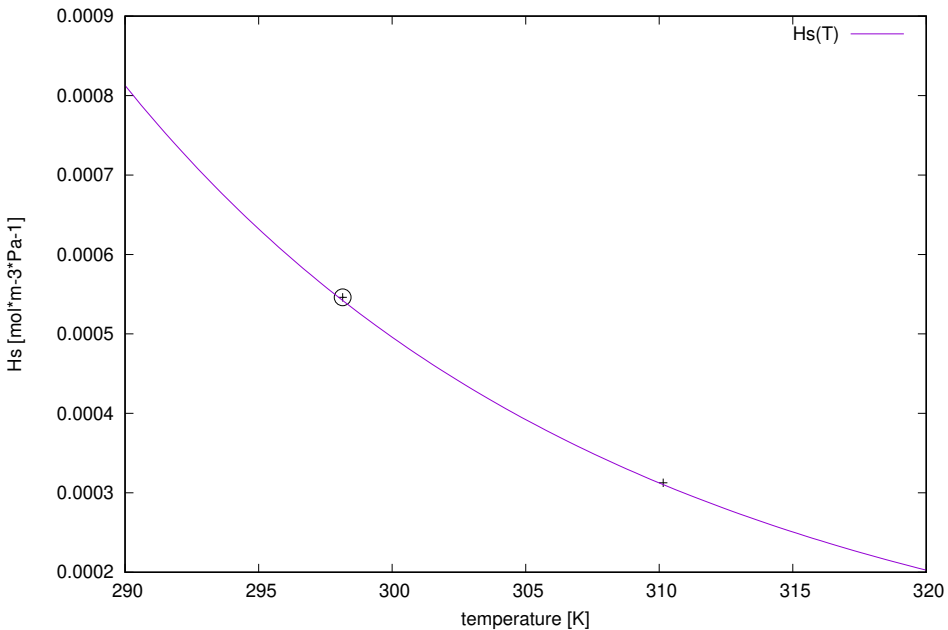

ref = 2445; chem = 2,2-dichloro-1,1-difluoro-1-methoxyethane; casrn = 76-38-0; r2 = 0.99967

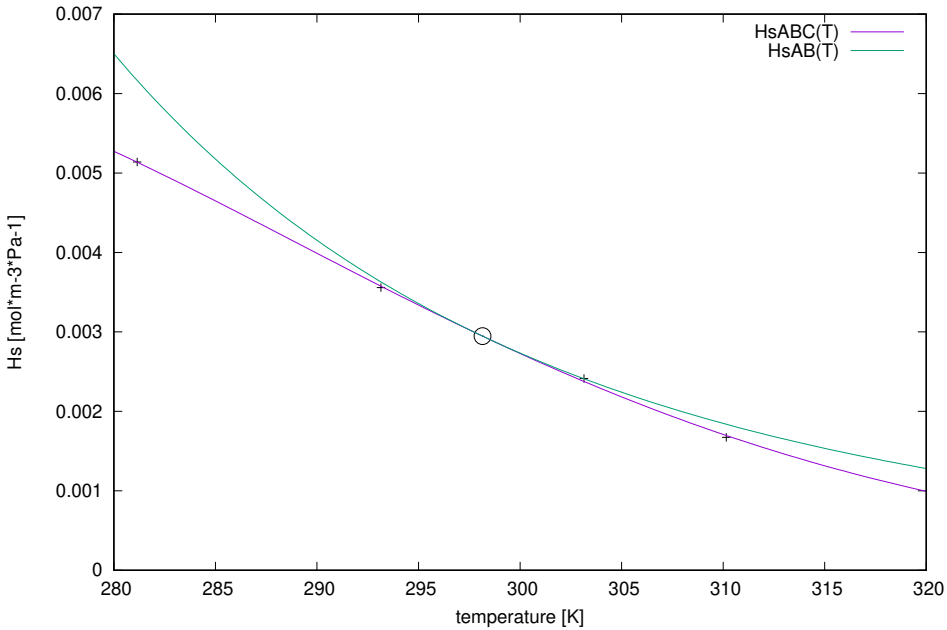

ref = 2447; chem = octafluorocyclobutane; casrn = 115-25-3; r2 = 0.99994

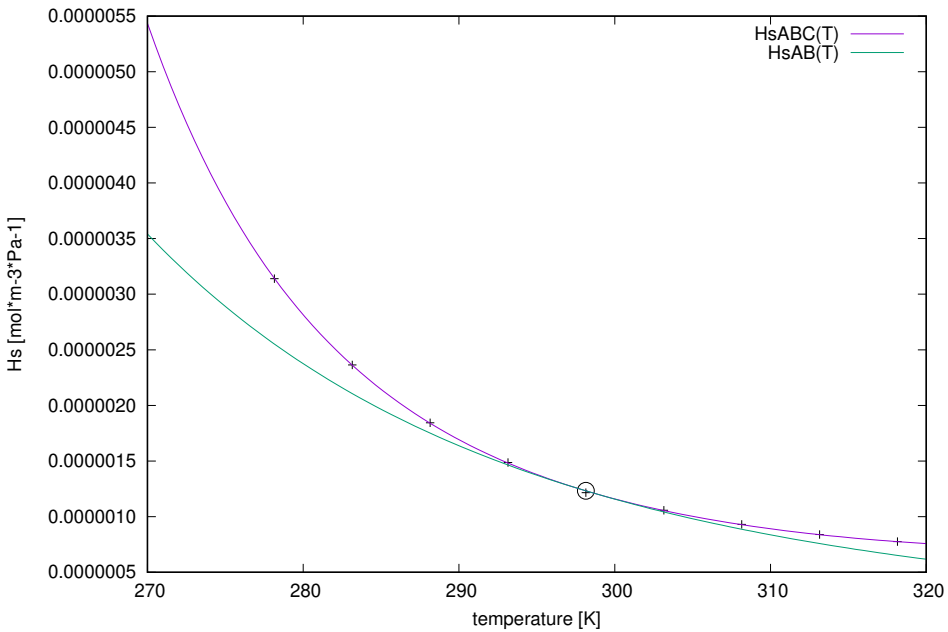

ref = 2447; chem = trifluoro(trifluoromethyl)-oxirane; casrn = 428-59-1; r2 = 0.98951

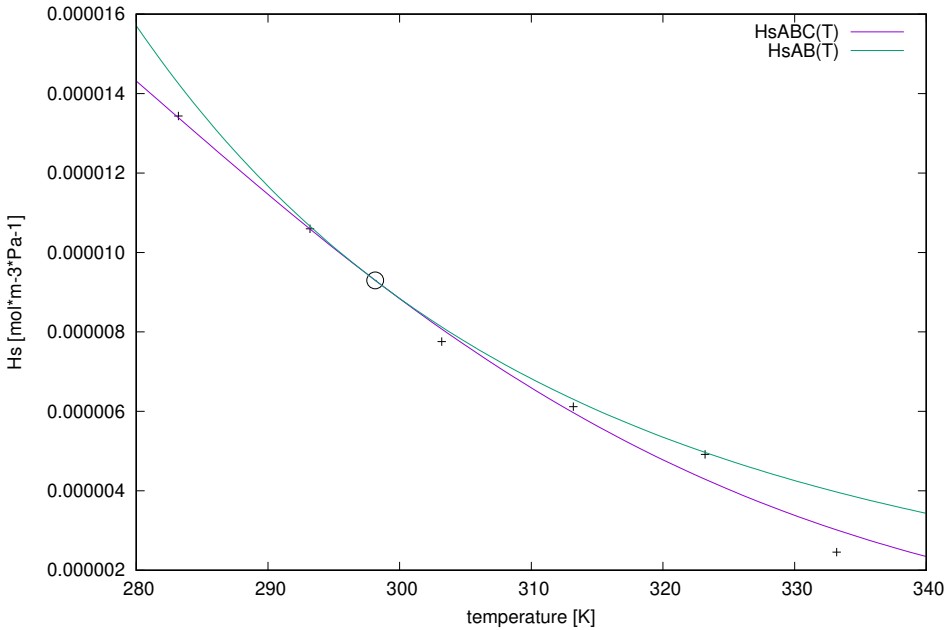



ref = 2451; chem = 4-hydroxychlorobenzene; casrn = 106-48-9; r2 = 0.97156

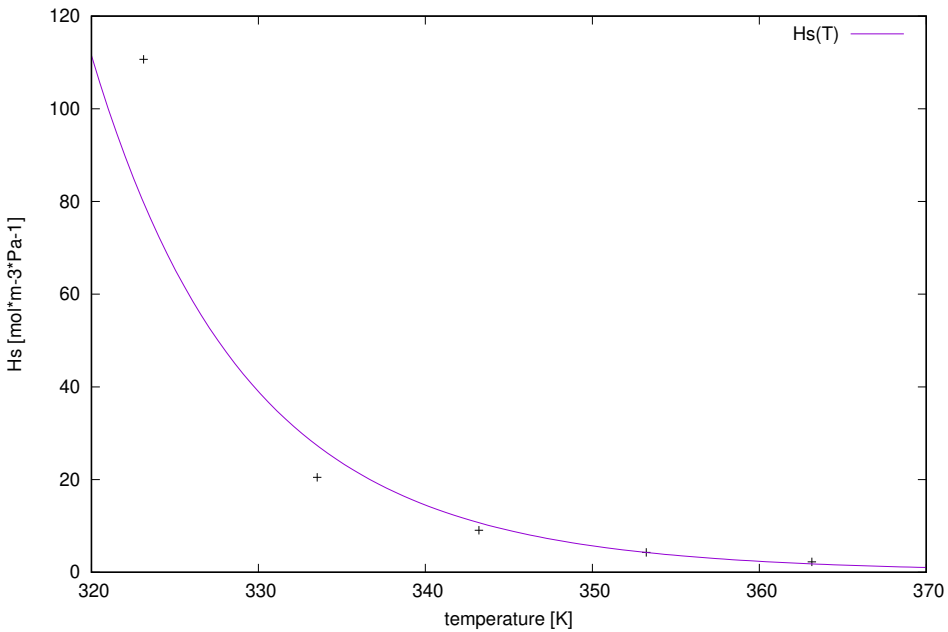

ref = 2451; chem = 3-hydroxychlorobenzene; casrn = 108-43-0; r2 = 0.99974

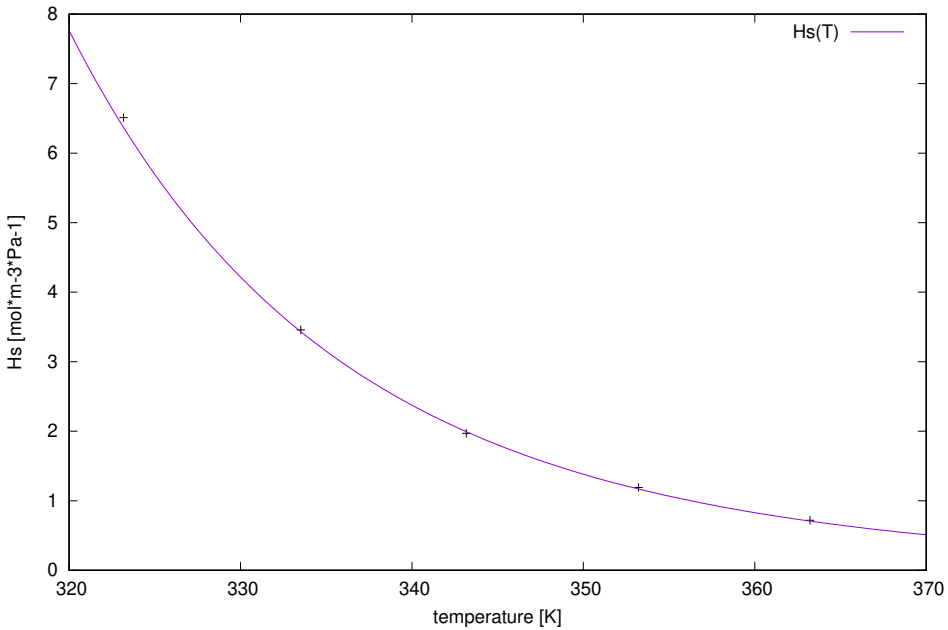

ref = 2451; chem = hydroxybenzene; casrn = 108-95-2; r2 = 0.98593

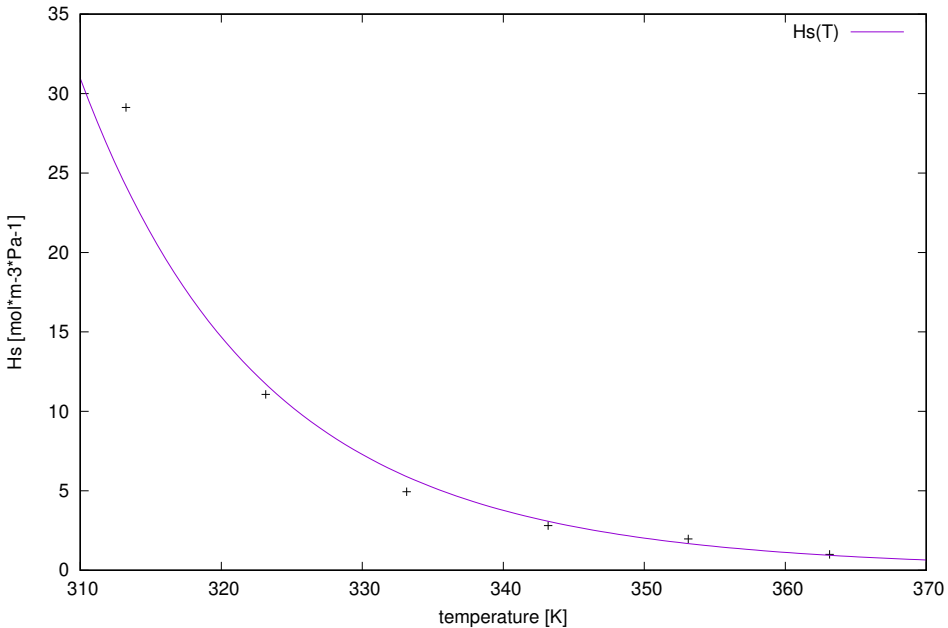

ref = 2451; chem = 2,4-dichlorophenol; casrn = 120-83-2; r2 = 0.99963

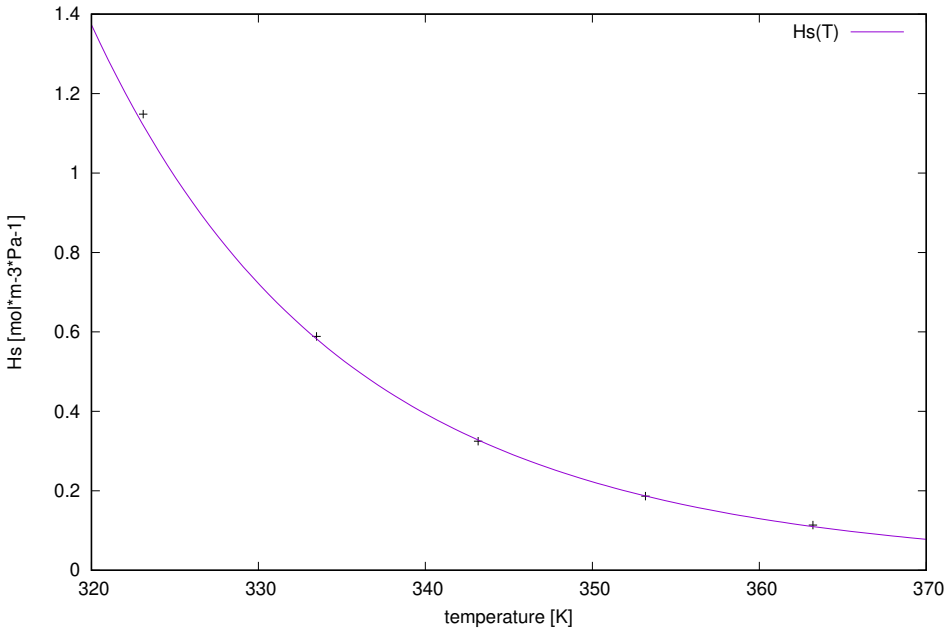

ref = 2451; chem = 2-hydroxychlorobenzene; casrn = 95-57-8; r2 = 0.99943

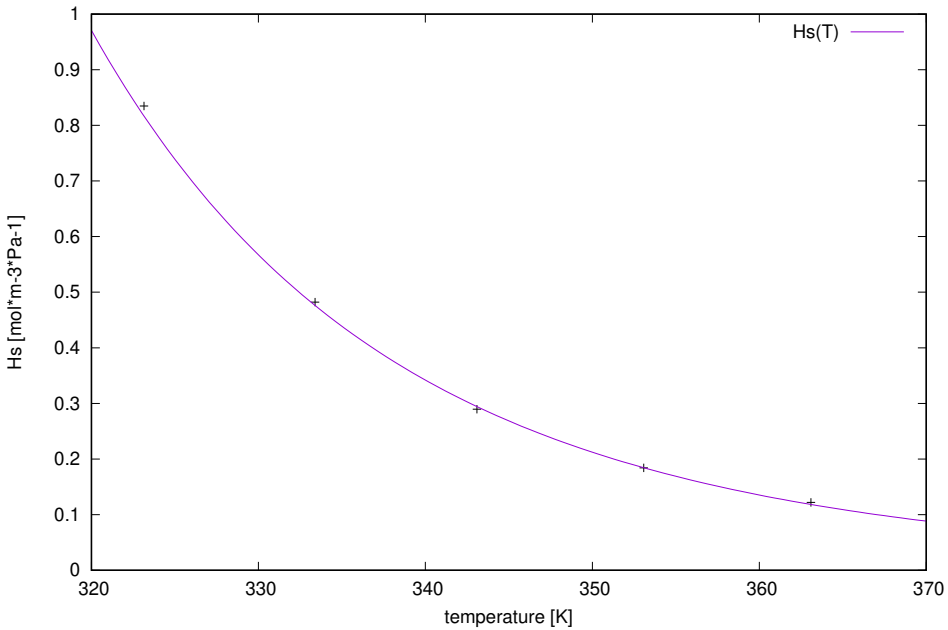

ref = 2453; chem = ethylbenzene; casrn = 100-41-4; r2 = 0.99852

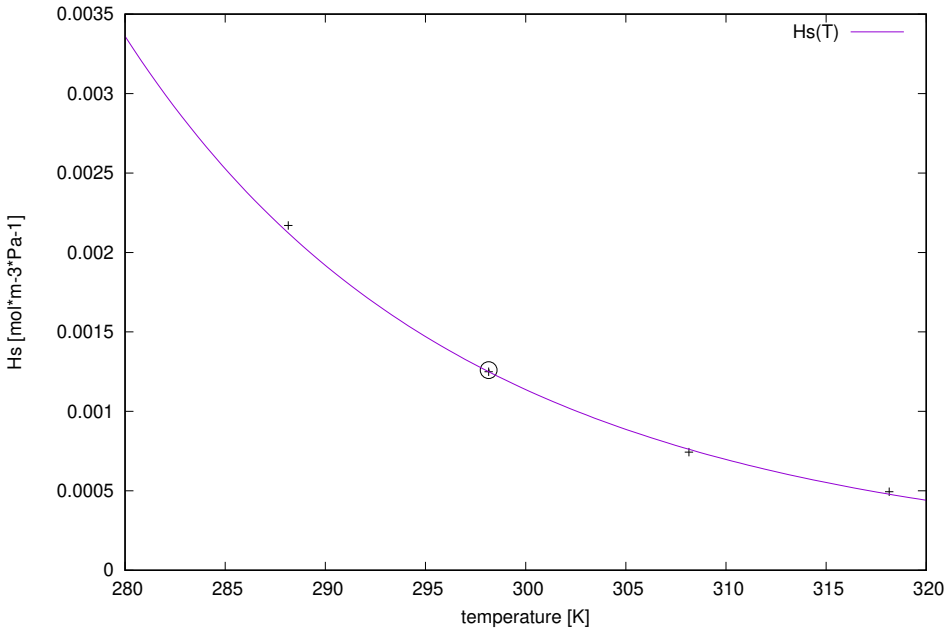

ref = 2453; chem = propylbenzene; casrn = 103-65-1; r2 = 0.99794

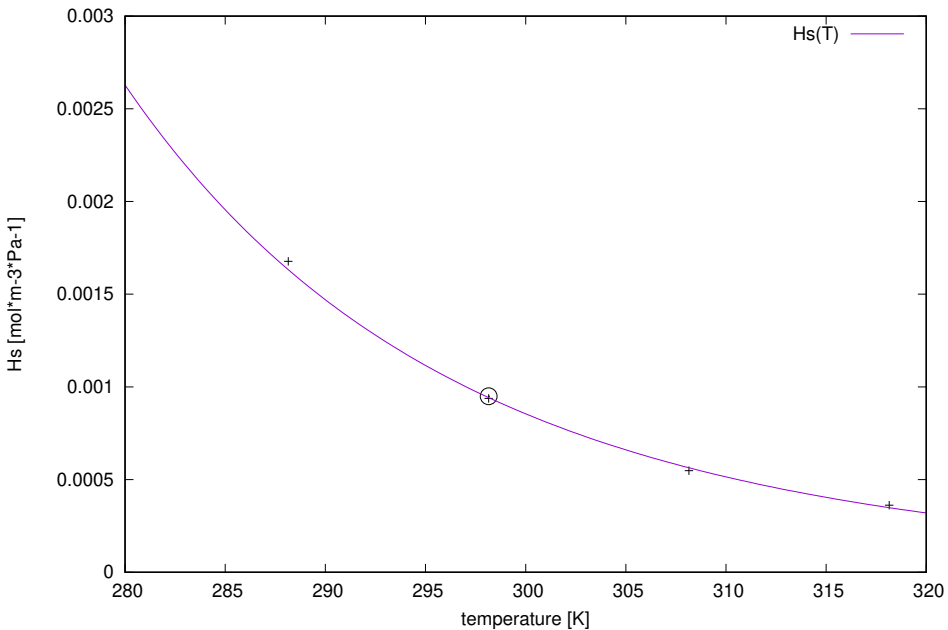

ref = 2453; chem = 1,4-dimethylbenzene; casrn = 106-42-3; r2 = 0.99985

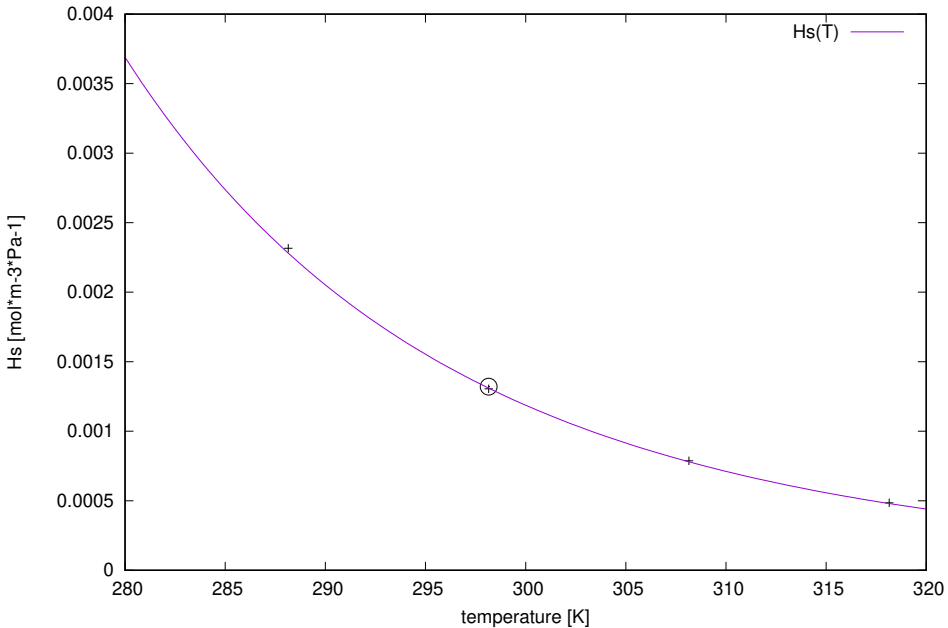



ref = 2453; chem = 1,3-dimethylbenzene; casrn = 108-38-3; r2 = 0.99797

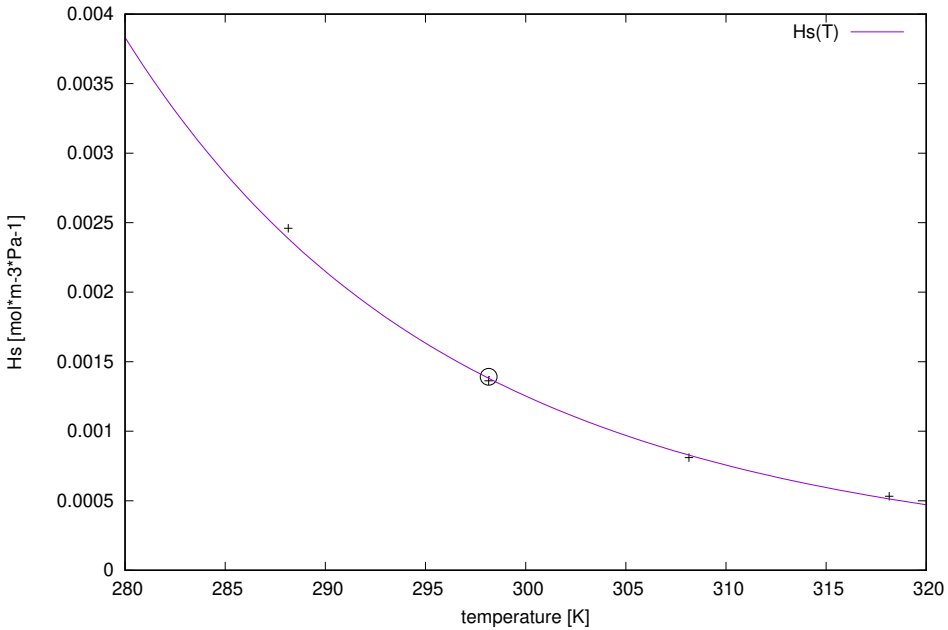

ref = 2453; chem = 1,3,5-trimethylbenzene; casrn = 108-67-8; r2 = 0.99994

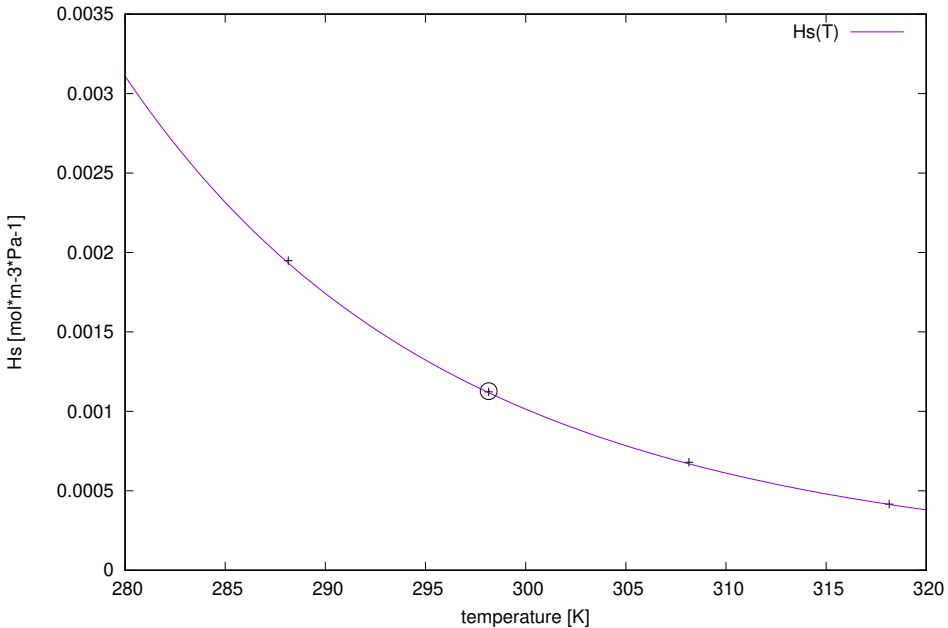

ref = 2453; chem = methylbenzene; casrn = 108-88-3; r2 = 0.99903

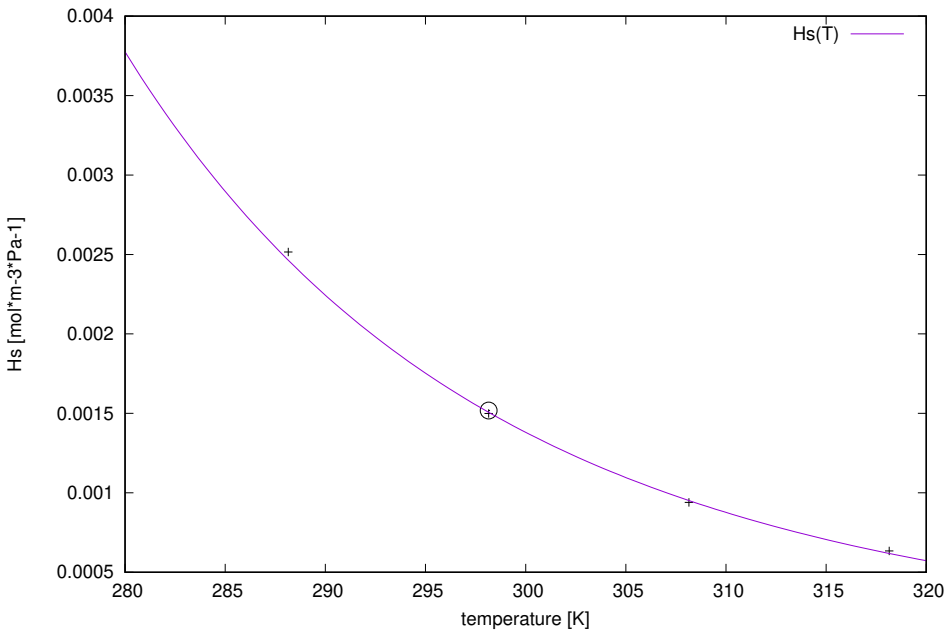

ref = 2453; chem = 1,2,3-trimethylbenzene; casrn = 526-73-8; r2 = 0.99617

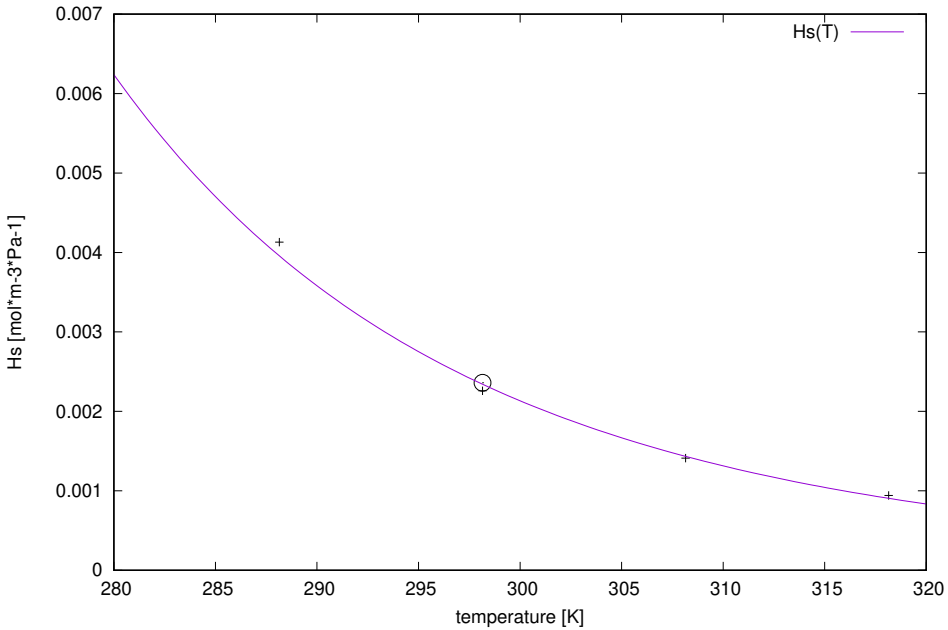

ref = 2453; chem = benzene; casrn = 71-43-2; r2 = 0.99863

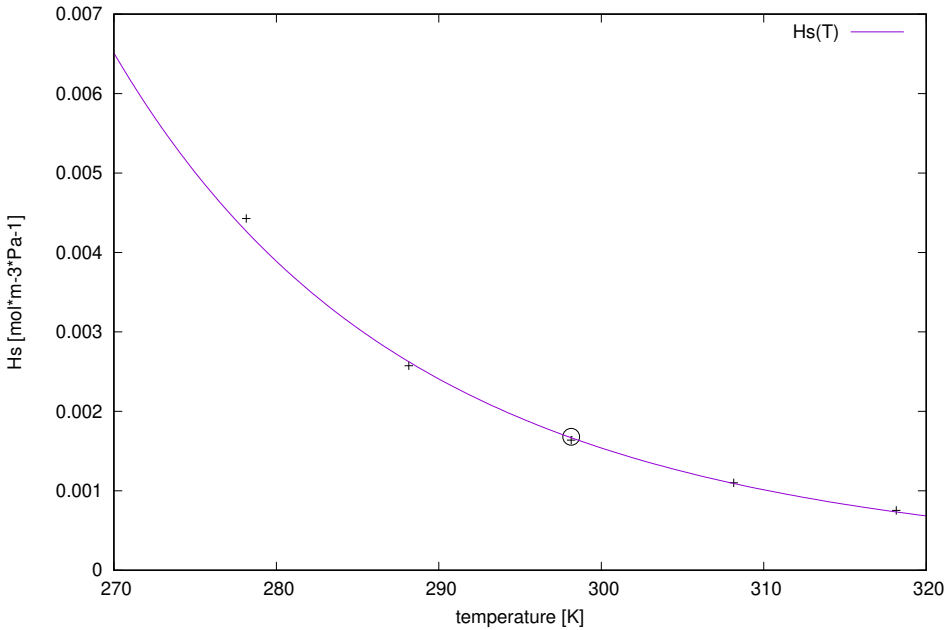

ref = 2453; chem = 1,2-dimethylbenzene; casrn = 95-47-6; r2 = 0.99932

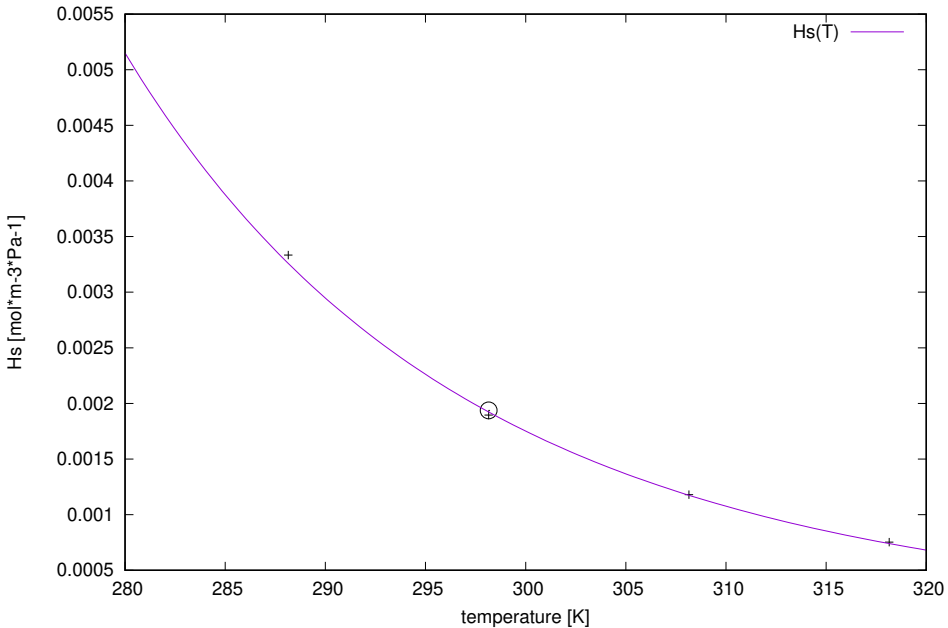

ref = 2453; chem = 1,2,4-trimethylbenzene; casrn = 95-63-6; r2 = 0.99968

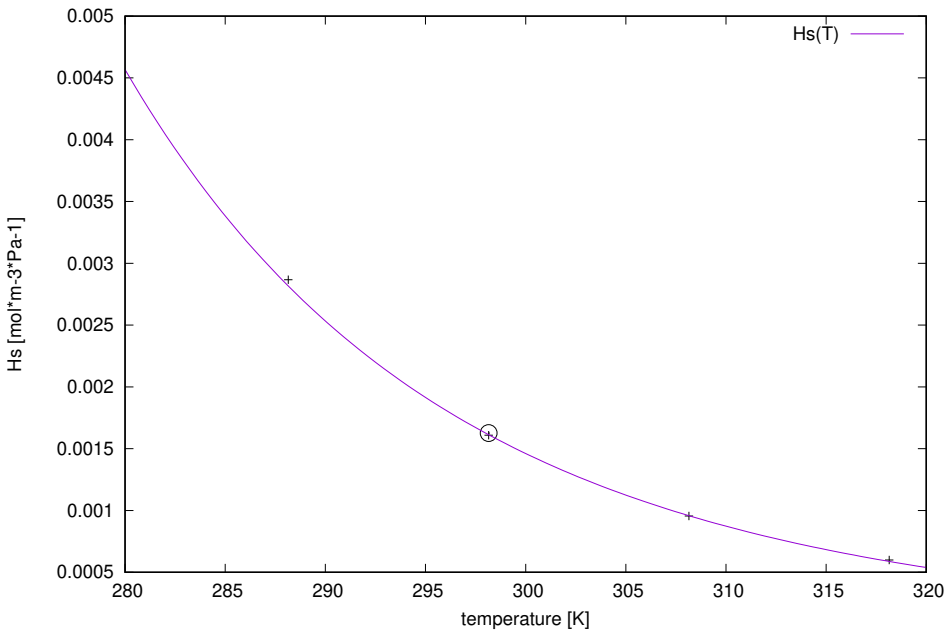

ref = 2453; chem = (2-propyl)-benzene; casrn = 98-82-8; r2 = 0.99803

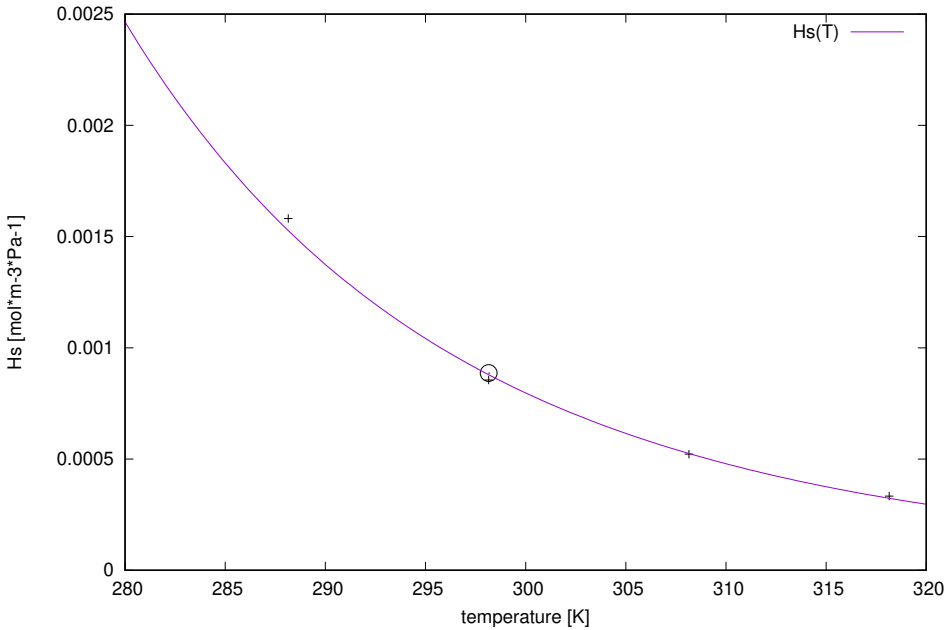



ref = 2458; chem = 1-ethylnaphthalene; casrn = 1127-76-0; r2 = 0.99732

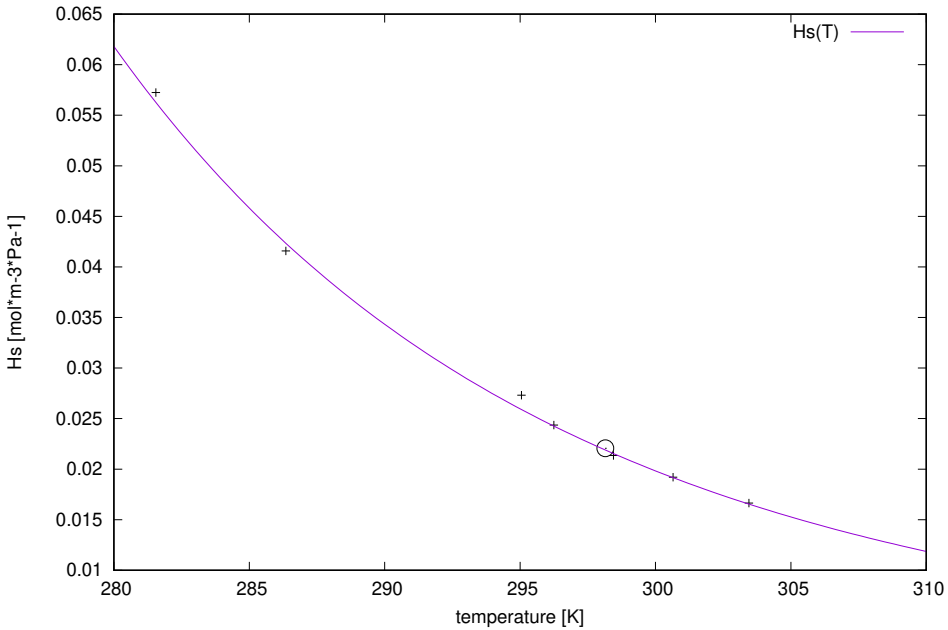

ref = 2458; chem = 1-methylnaphthalene; casrn = 90-12-0; r2 = 0.99379

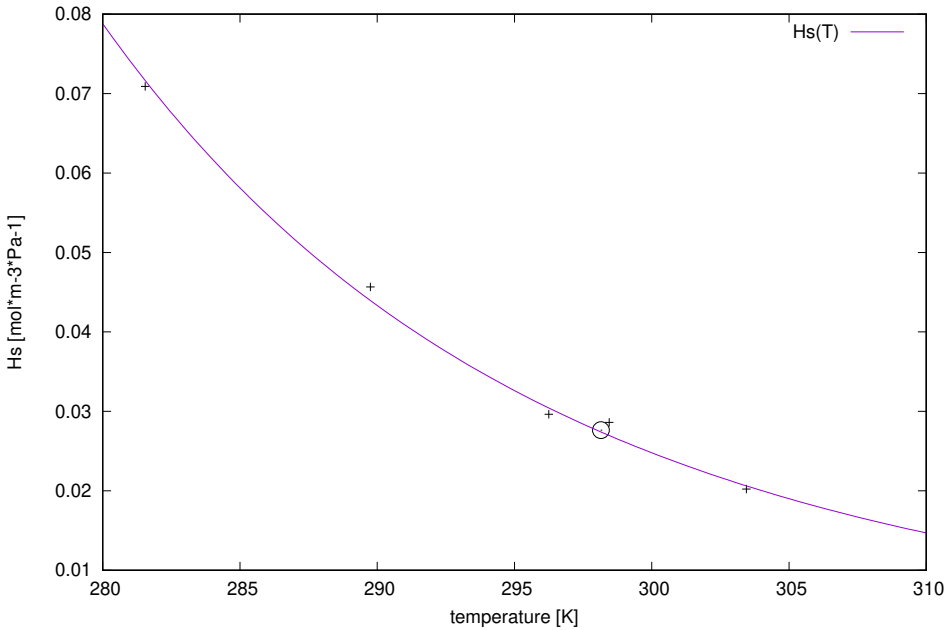

ref = 2458; chem = naphthalene; casrn = 91-20-3; r2 = 0.99768

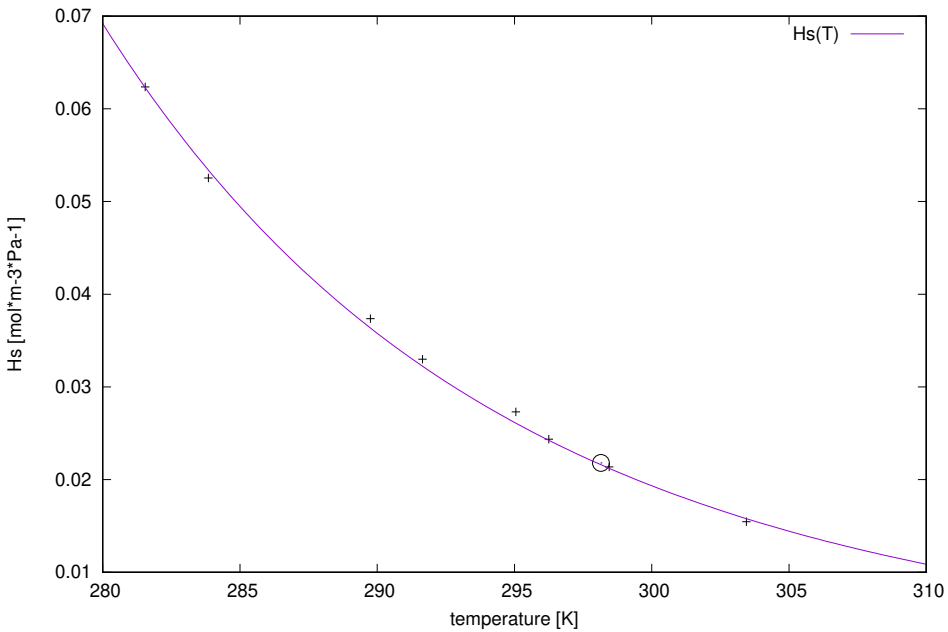

ref = 2463; chem = methylbenzene; casrn = 108-88-3; r2 = 0.98882

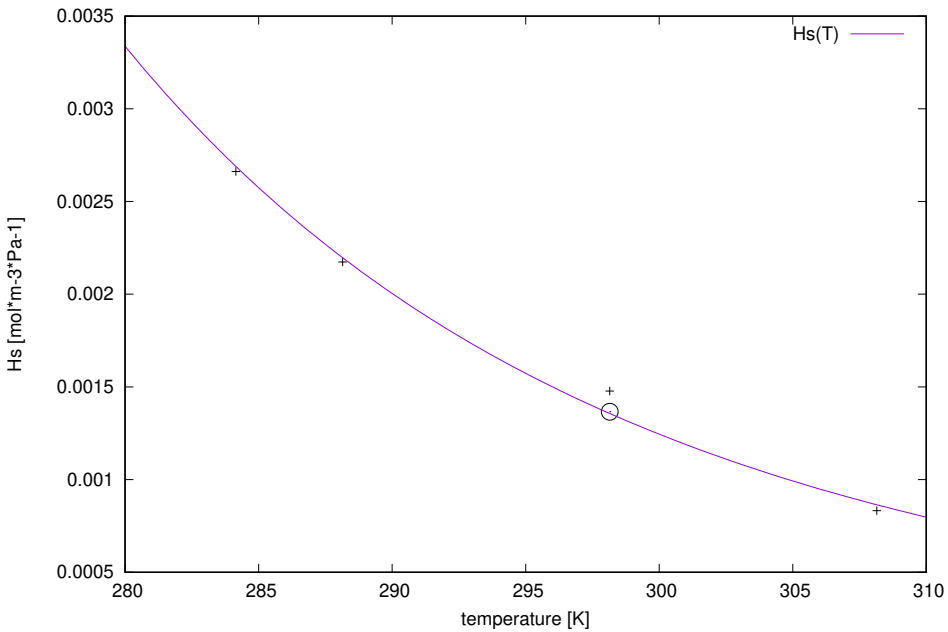

ref = 2463; chem = trichloromethane; casrn = 67-66-3; r2 = 1.00000

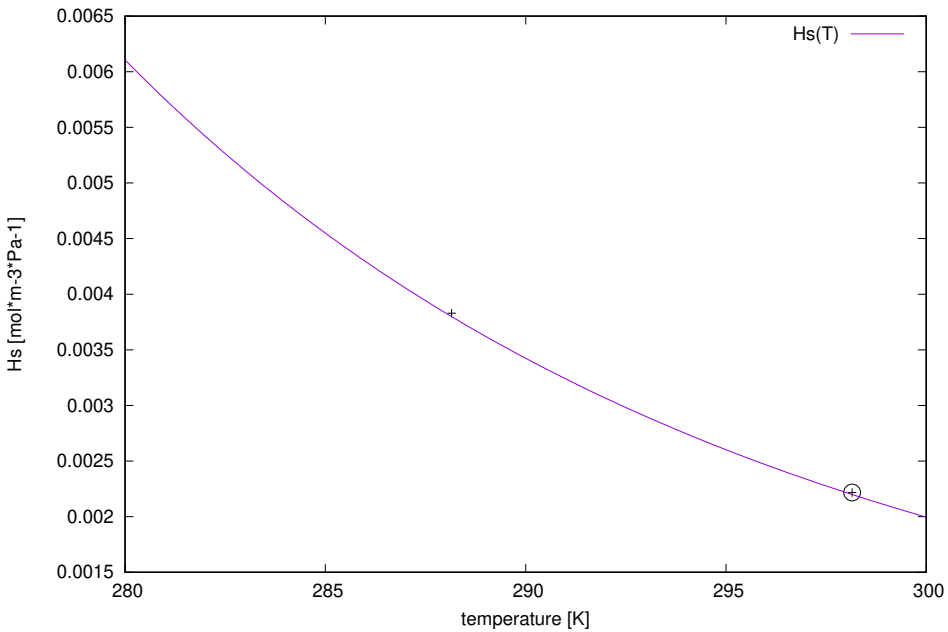

ref = 2463; chem = benzene; casrn = 71-43-2; r2 = 0.99826

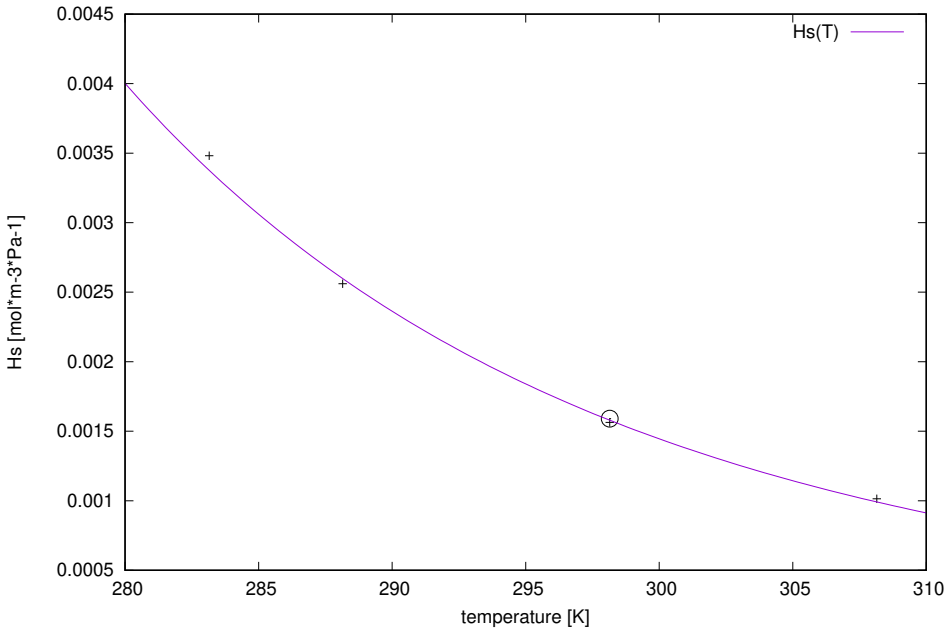

ref = 2464; chem = limonene; casrn = 138-86-3; r2 = 1.00000

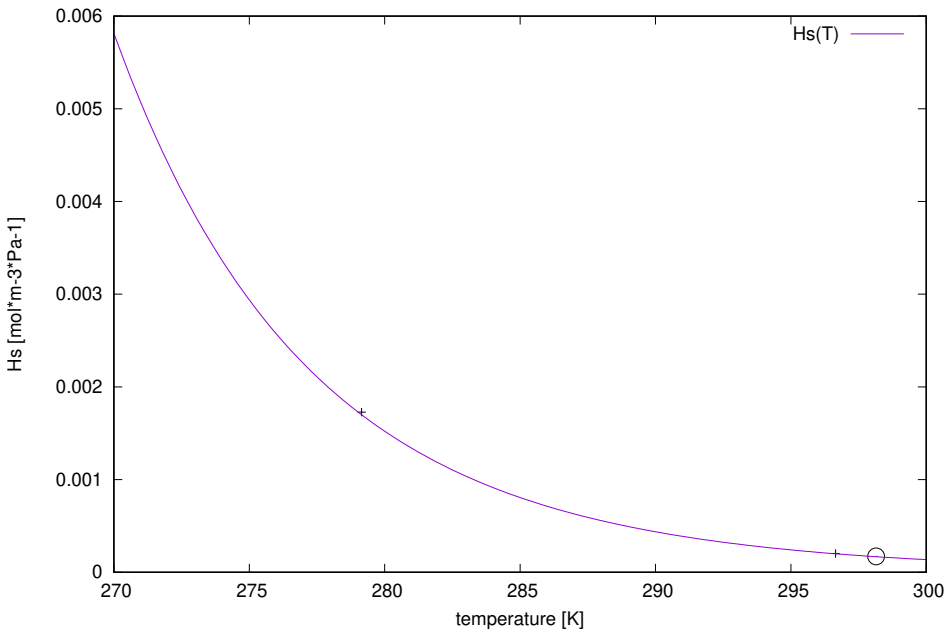

ref = 2464; chem = terpinolene; casrn = 586-62-9; r2 = 1.00000

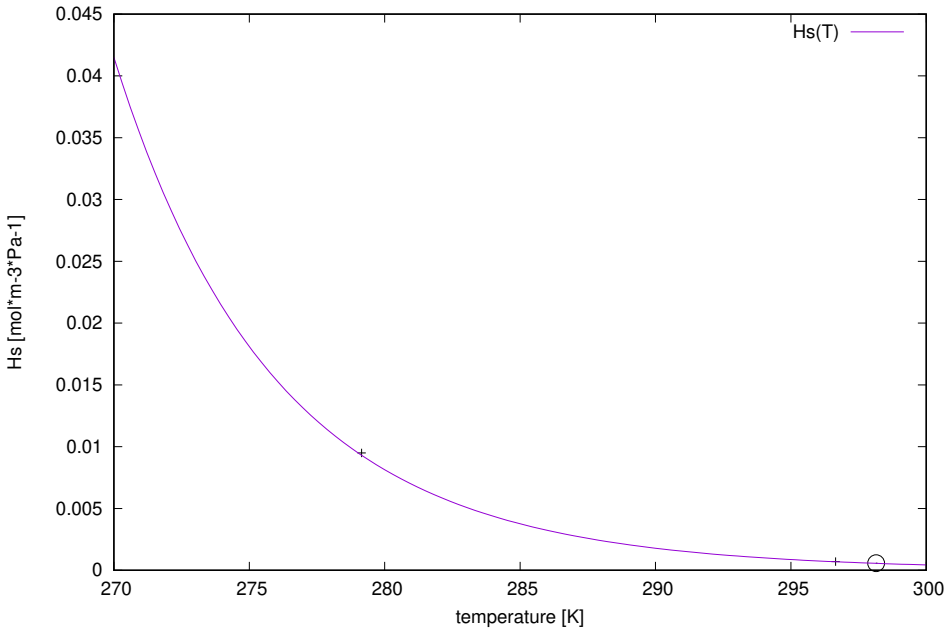



ref = 2464; chem = arbanol; casrn = 7070-15-7; r2 = 1.00000

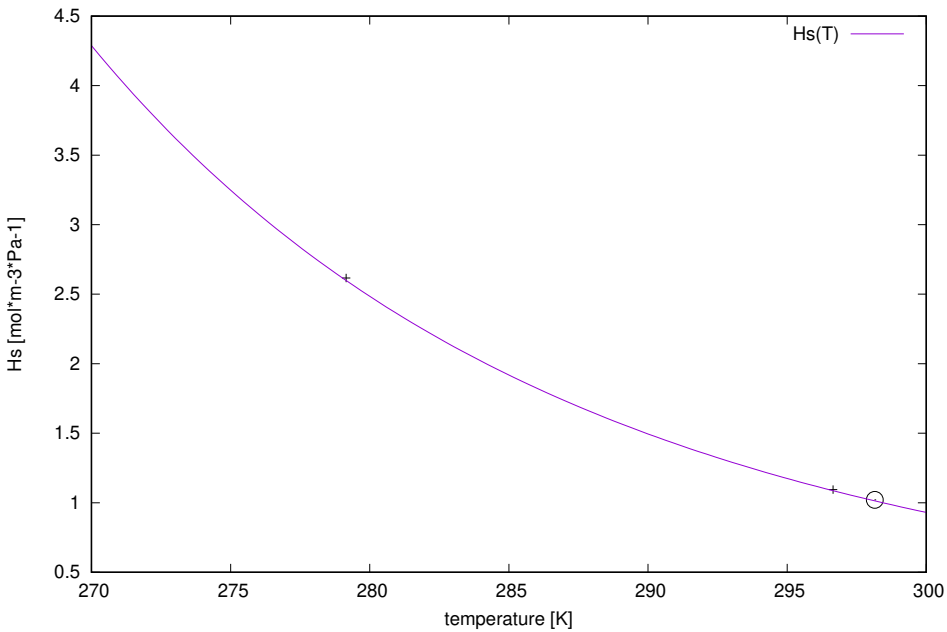

ref = 2464; chem = plinol; casrn = 72402-00-7; r2 = 1.00000

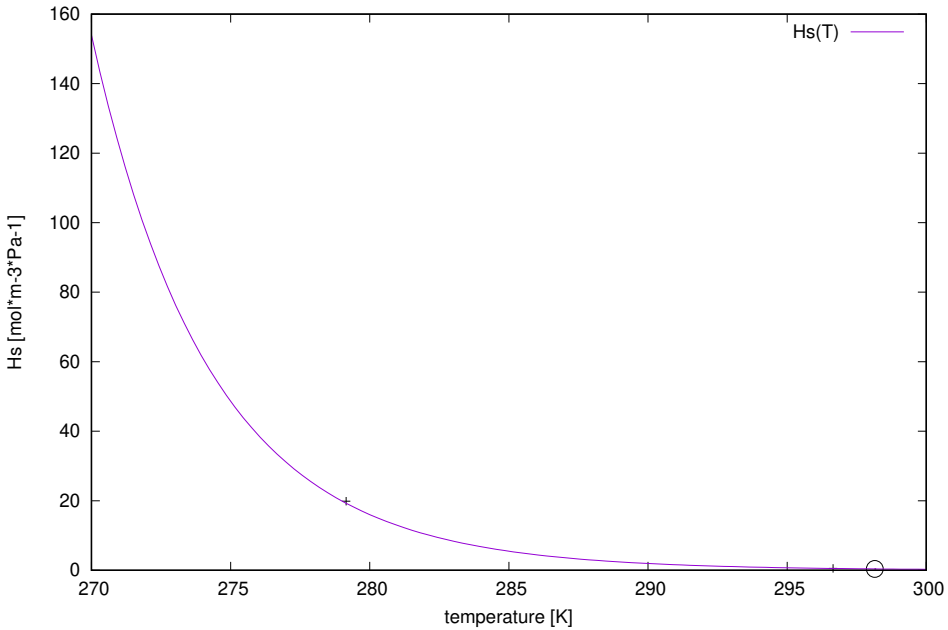

ref = 2464; chem = 3,7-dimethyl-1,6-octadien-3-ol; casrn = 78-70-6; r2 = 1.00000

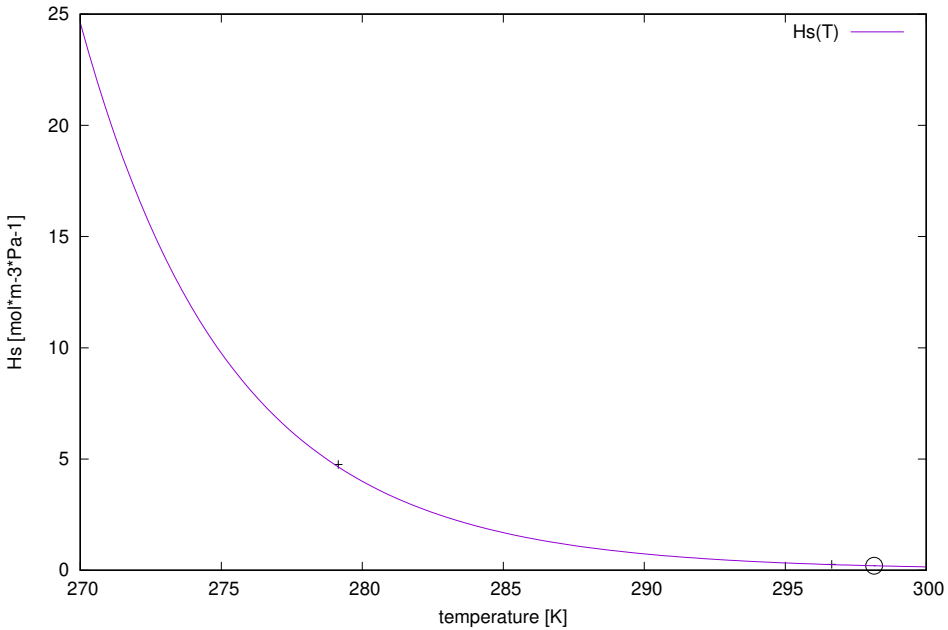

ref = 2464; chem =  $\alpha$ -pinene; casrn = 80-56-8; r2 = 1.00000

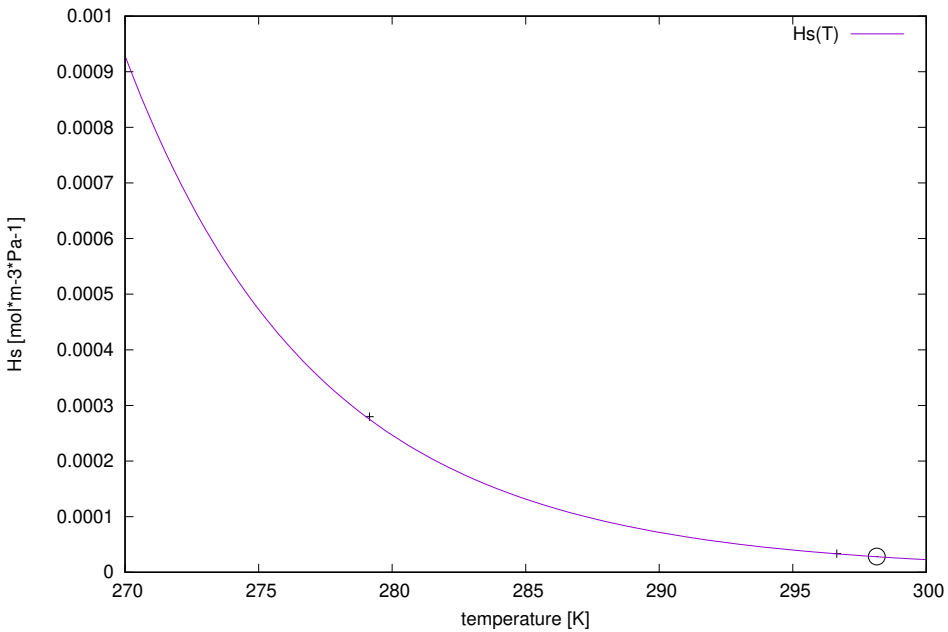

ref = 2464; chem = alpha-terpineol; casrn = 98-55-5; r2 = 1.00000

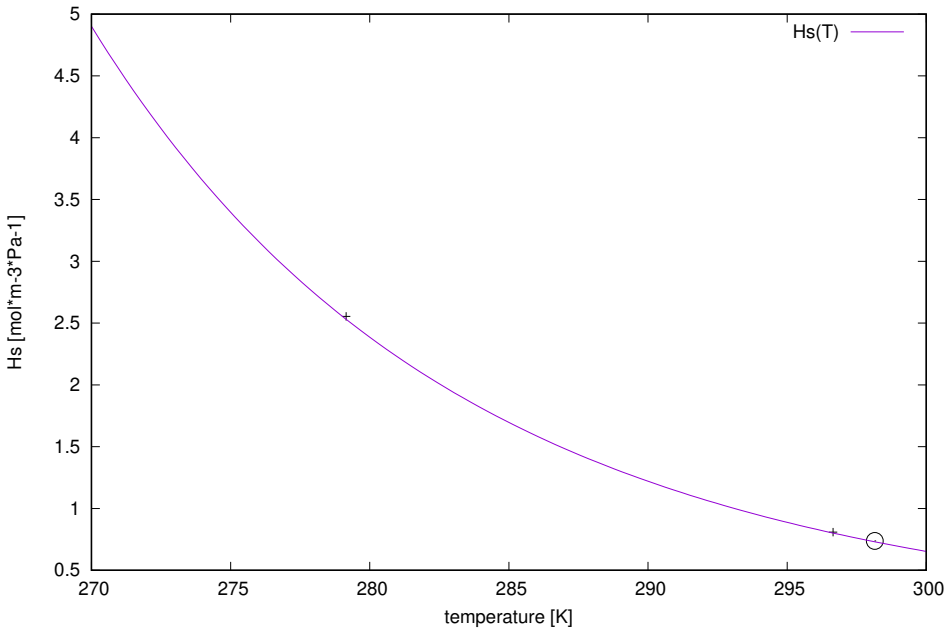

ref = 2464; chem = gamma-terpinene; casrn = 99-85-4; r2 = 1.00000

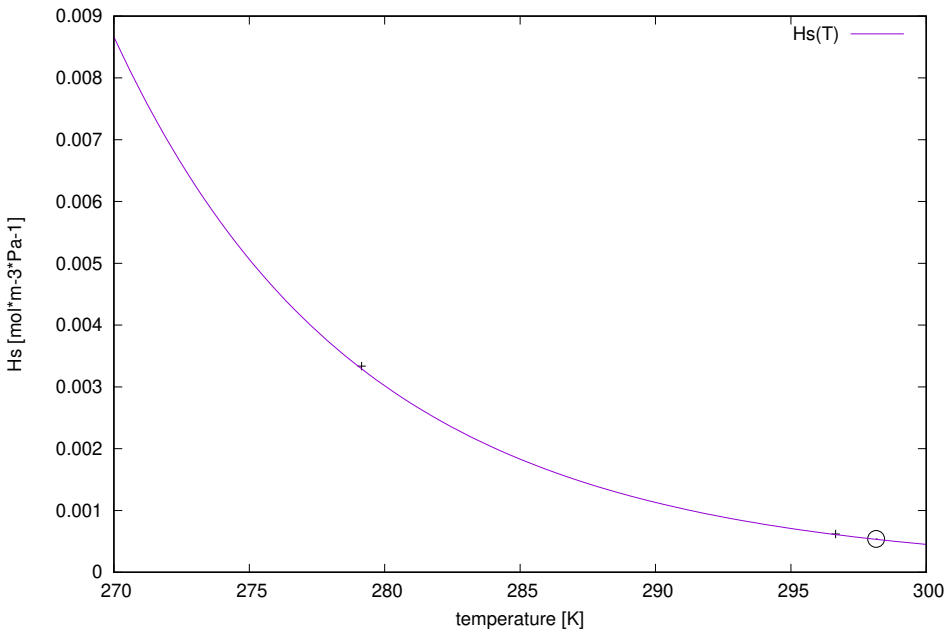

ref = 2471; chem = benzene; casrn = 71-43-2; r2 = 1.00000

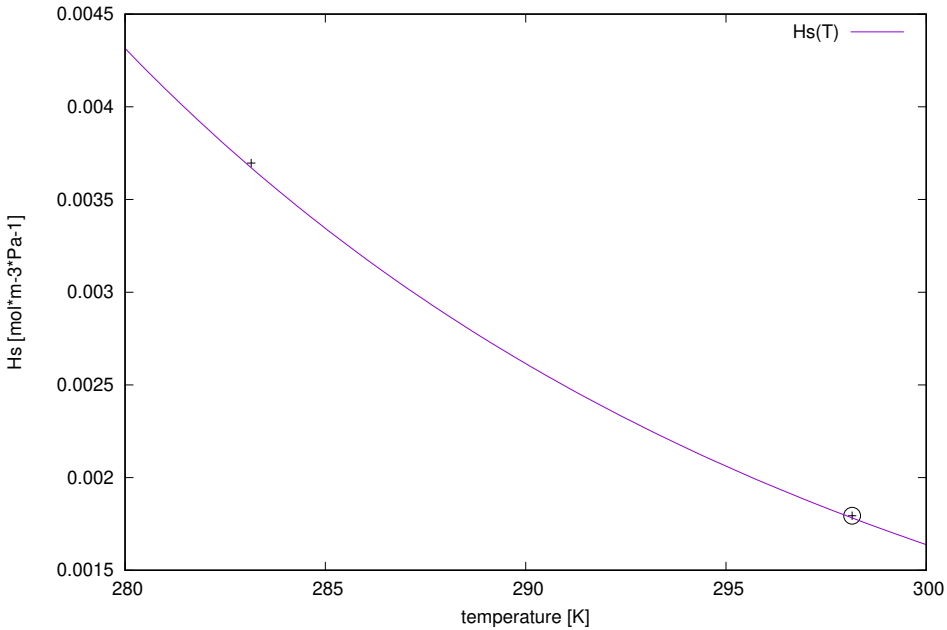

ref = 2477; chem = anthracene; casrn = 120-12-7; r2 = 0.99999

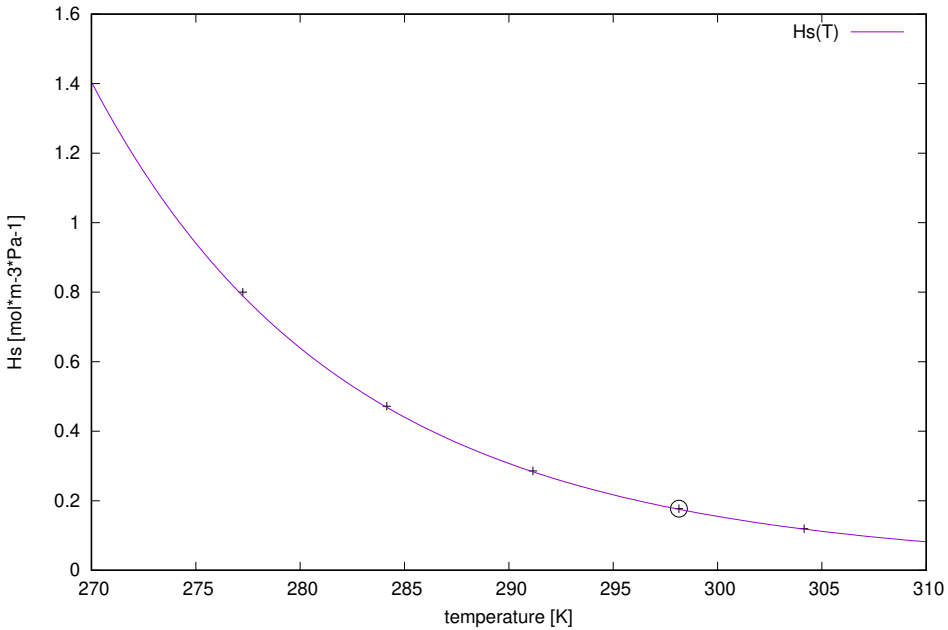



ref = 2477; chem = pyrene; casrn = 129-00-0; r2 = 0.99999

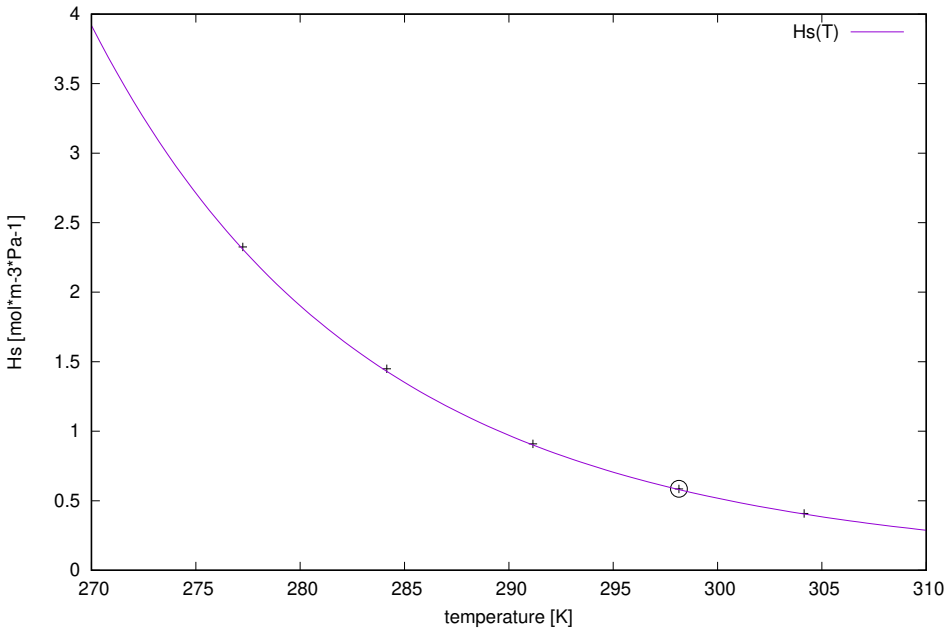

ref = 2477; chem = benzo[jk]fluorene; casrn = 206-44-0; r2 = 0.99998

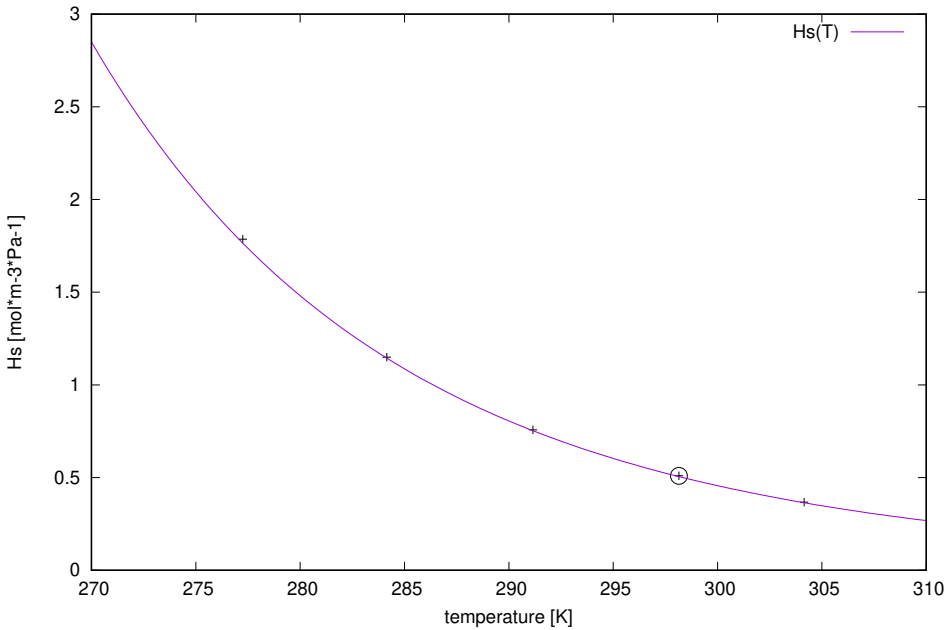

ref = 2477; chem = acenaphthylene; casrn = 208-96-8; r2 = 0.99999

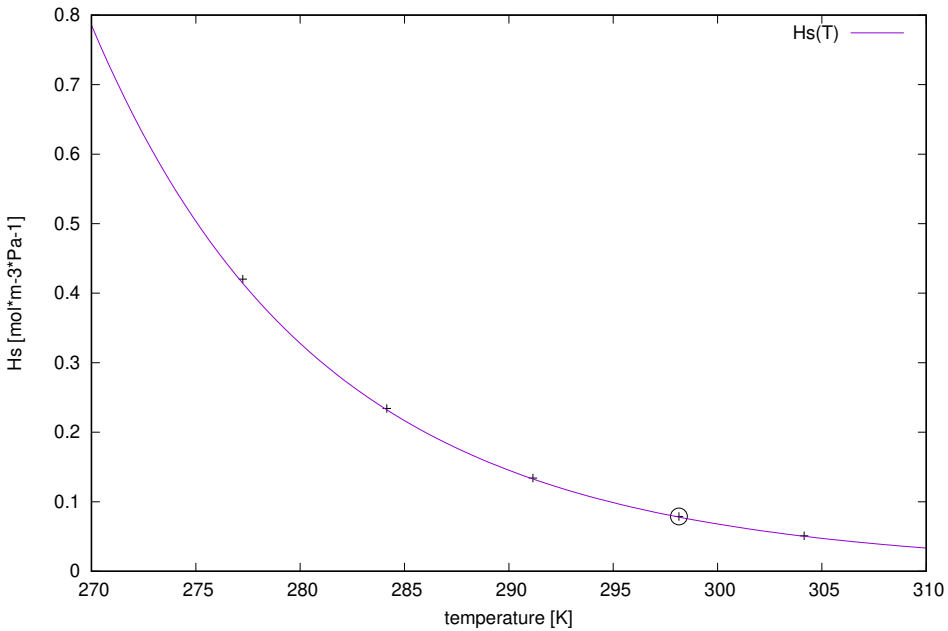

ref = 2477; chem = chrysene; casrn = 218-01-9; r2 = 0.99901

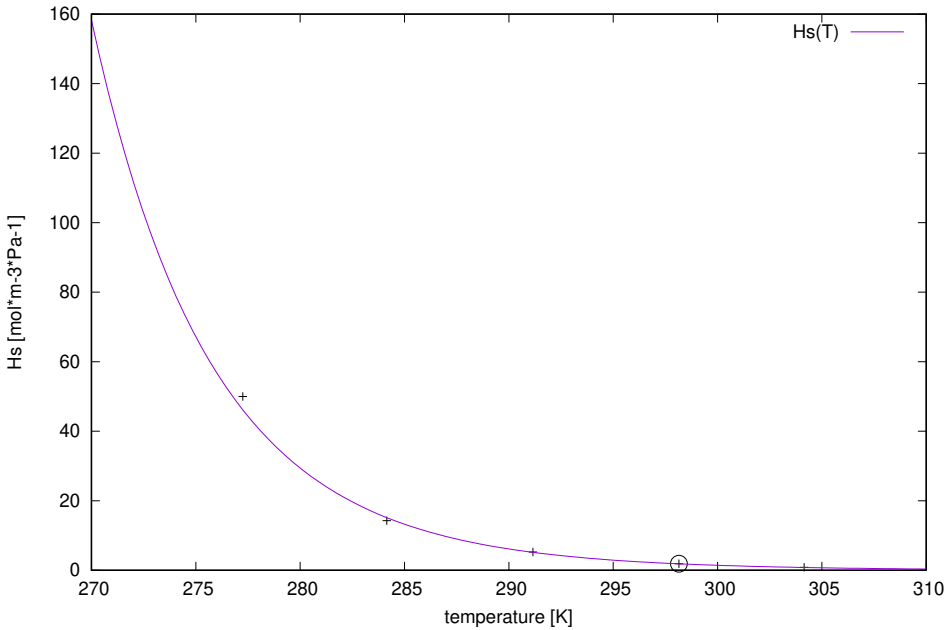

ref = 2477; chem = benzo[a]fluorene; casrn = 238-84-6; r2 = 1.00000

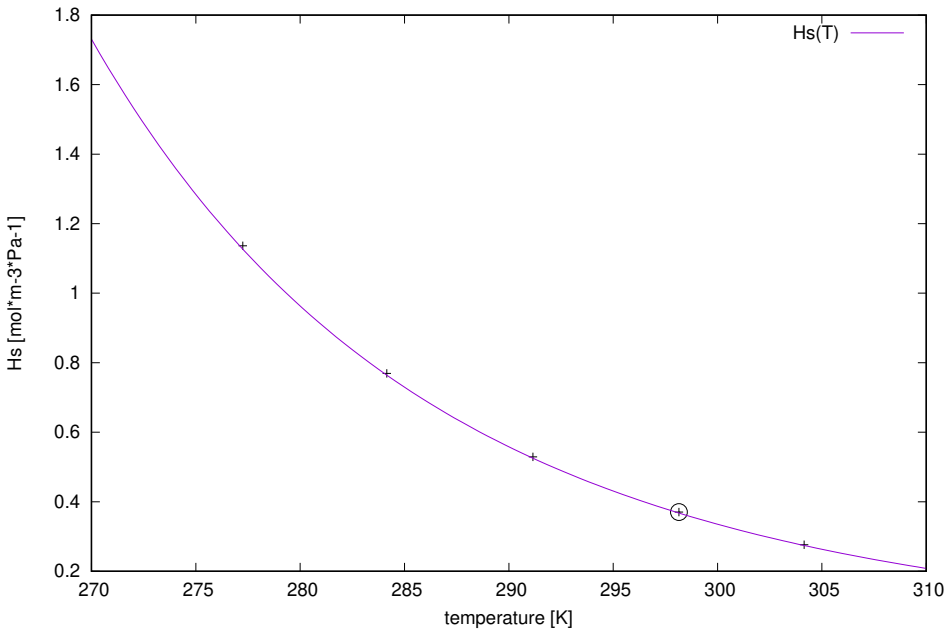

ref = 2477; chem = benz[a]anthracene; casrn = 56-55-3; r2 = 0.99999

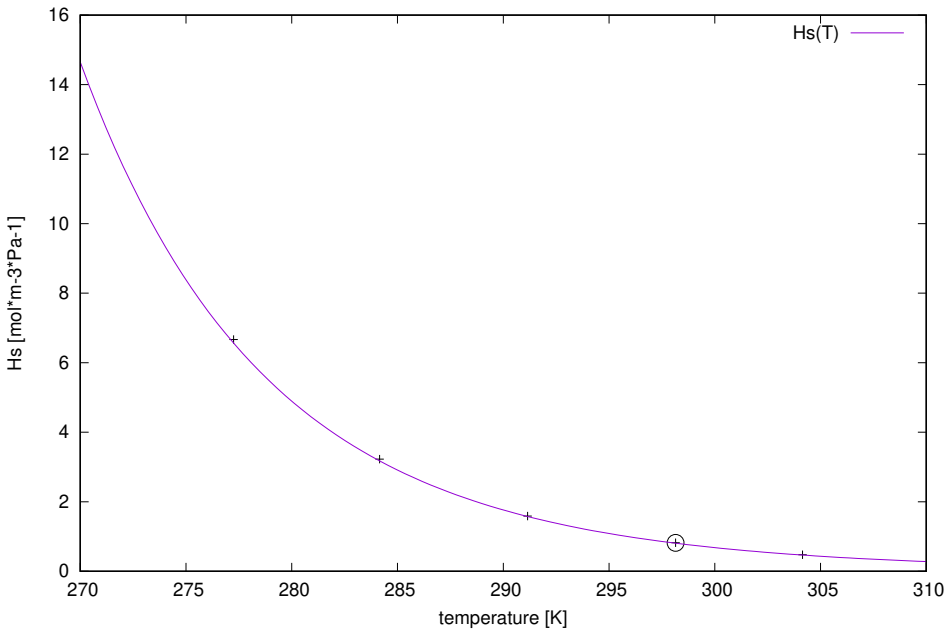

ref = 2477; chem = acenaphthene; casrn = 83-32-9; r2 = 0.99999

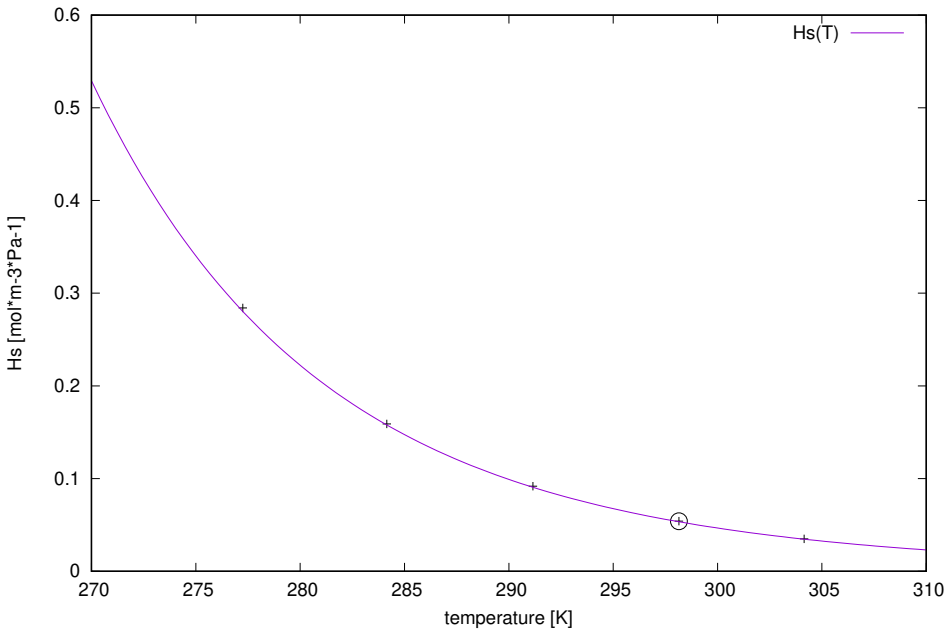

ref = 2477; chem = 1-methylphenanthrene; casrn = 832-69-9; r2 = 1.00000

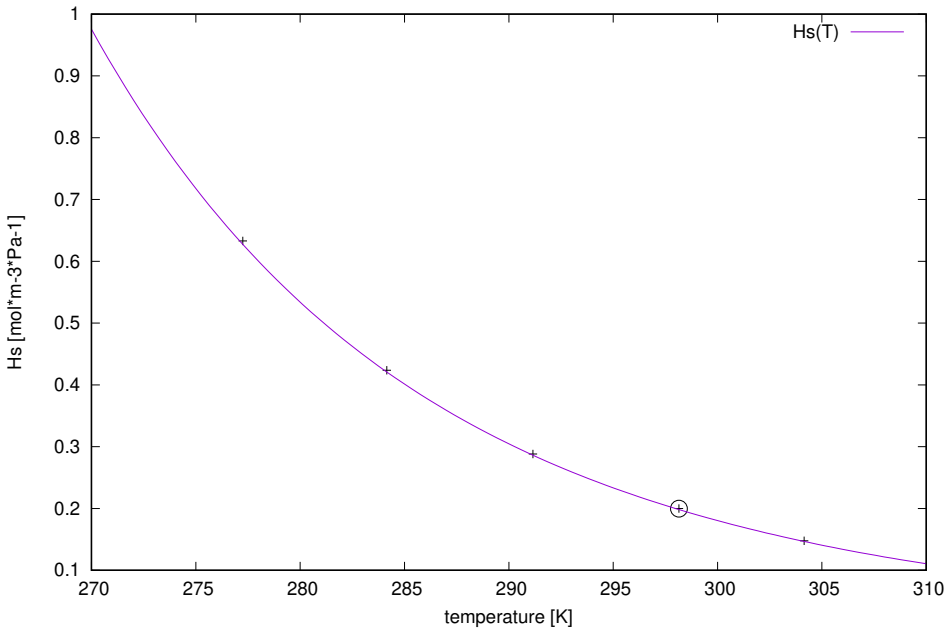



ref = 2477; chem = phenanthrene; casrn = 85-01-8; r2 = 0.99999

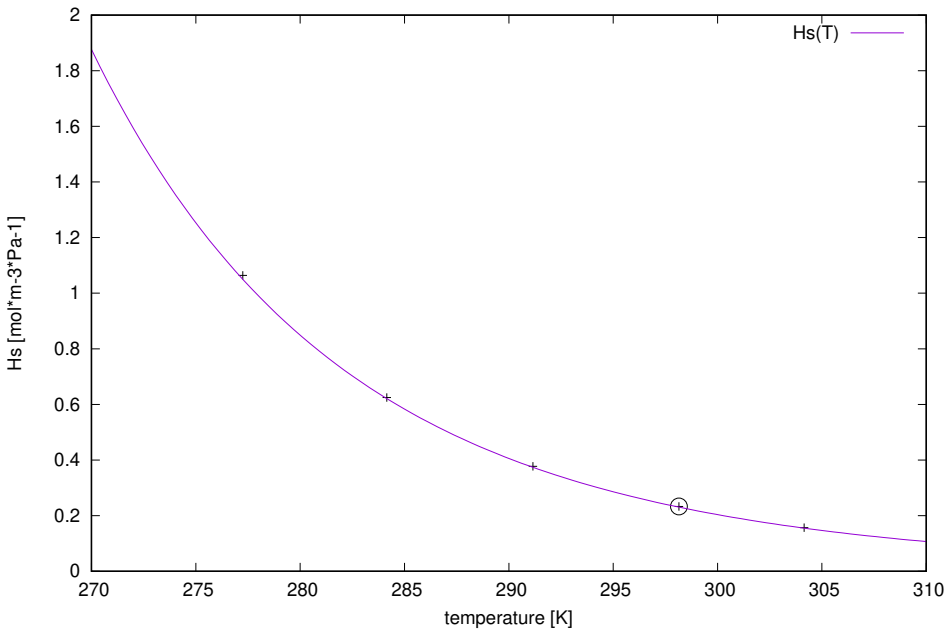

ref = 2477; chem = 2,3-benzindene; casrn = 86-73-7; r2 = 1.00000

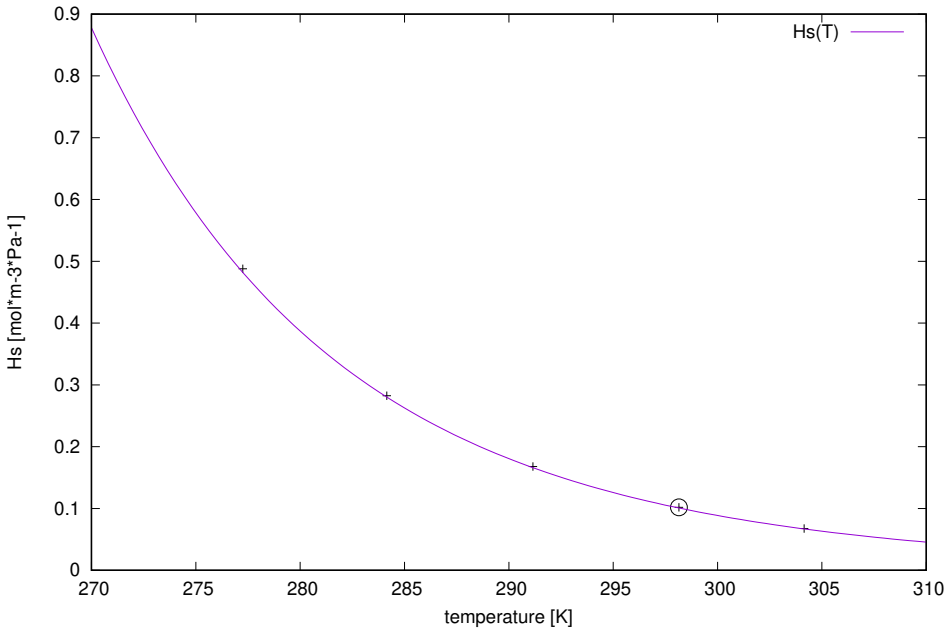

ref = 2477; chem = 1-methylnaphthalene; casrn = 90-12-0; r2 = 0.99999

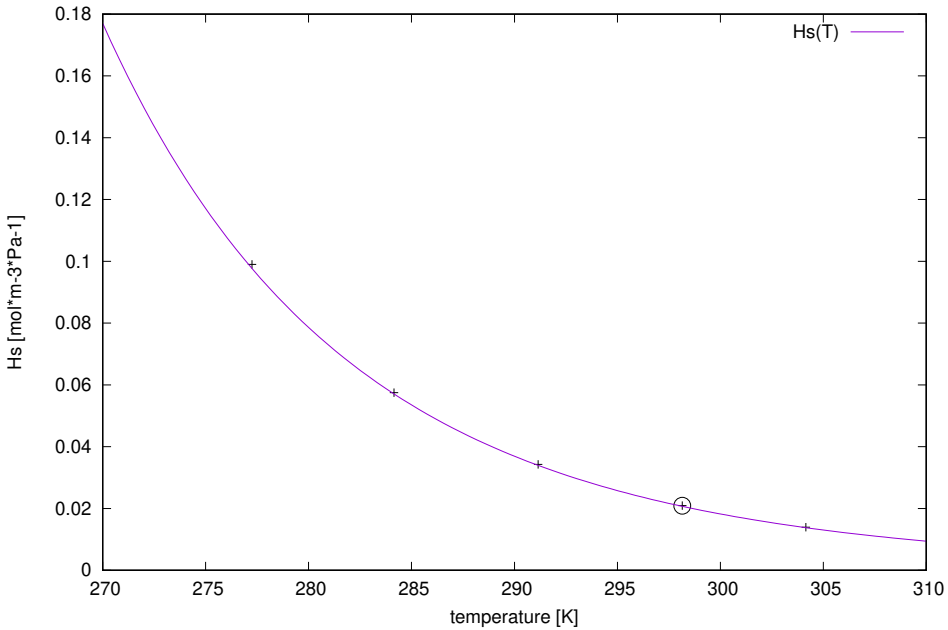

ref = 2477; chem = 2-methylnaphthalene; casrn = 91-57-6; r2 = 0.99999

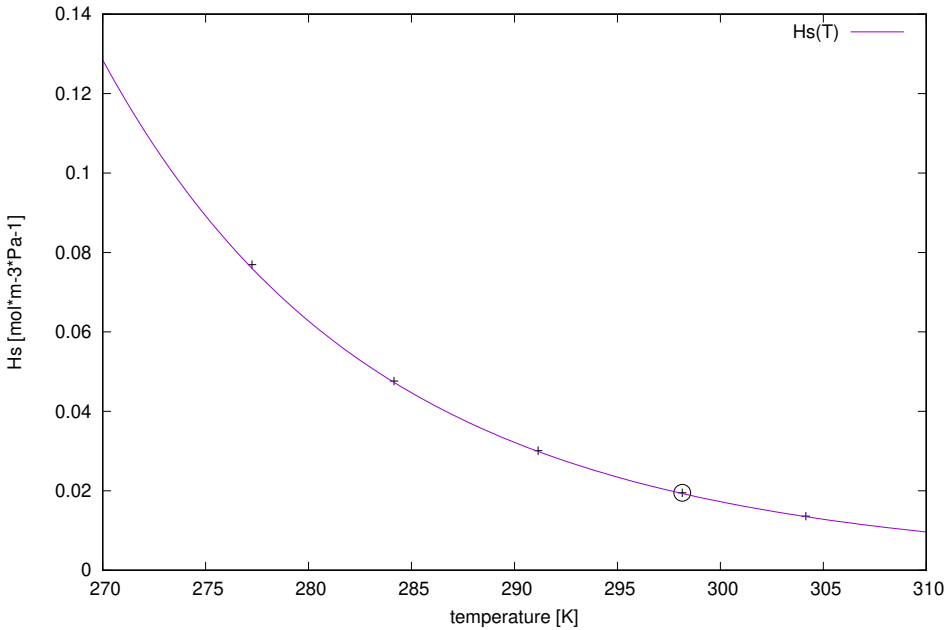

ref = 2484; chem = octafluorocyclobutane; casrn = 115-25-3; r2 = 0.99975

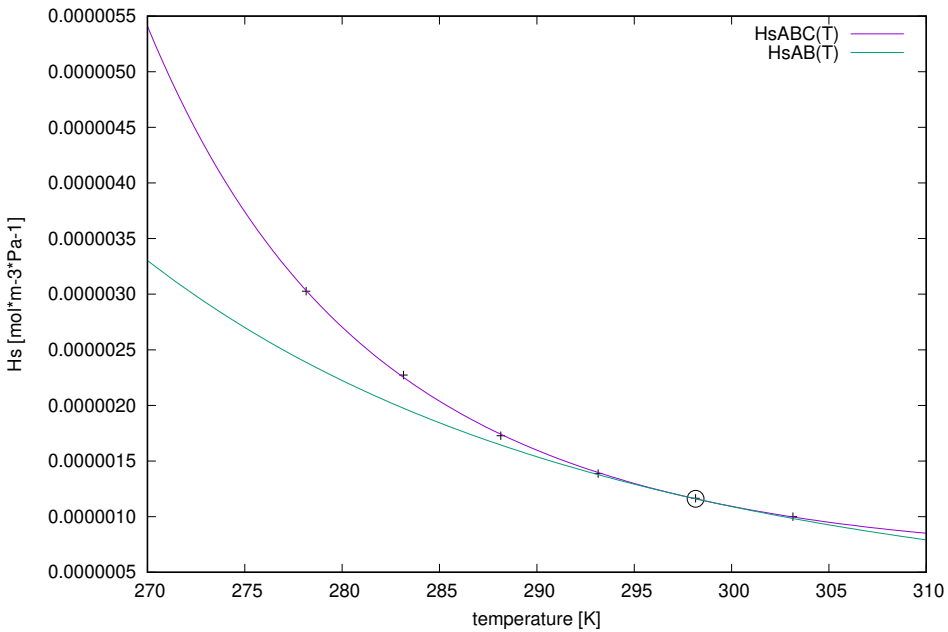

ref = 2484; chem = tetrafluoromethane; casrn = 75-73-0; r2 = 0.99969

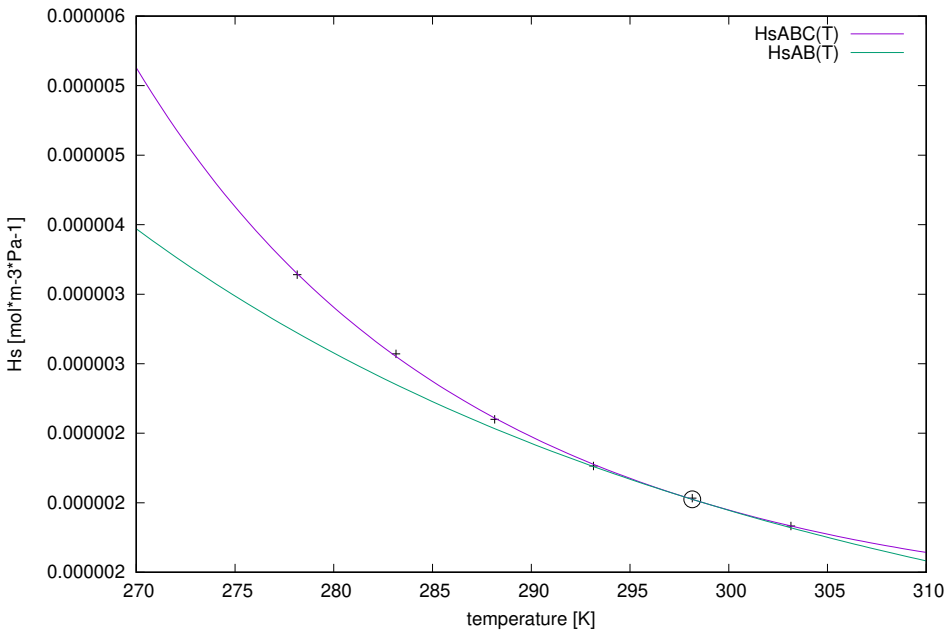

ref = 2484; chem = hexafluoroethane; casrn = 76-16-4; r2 = 0.99546

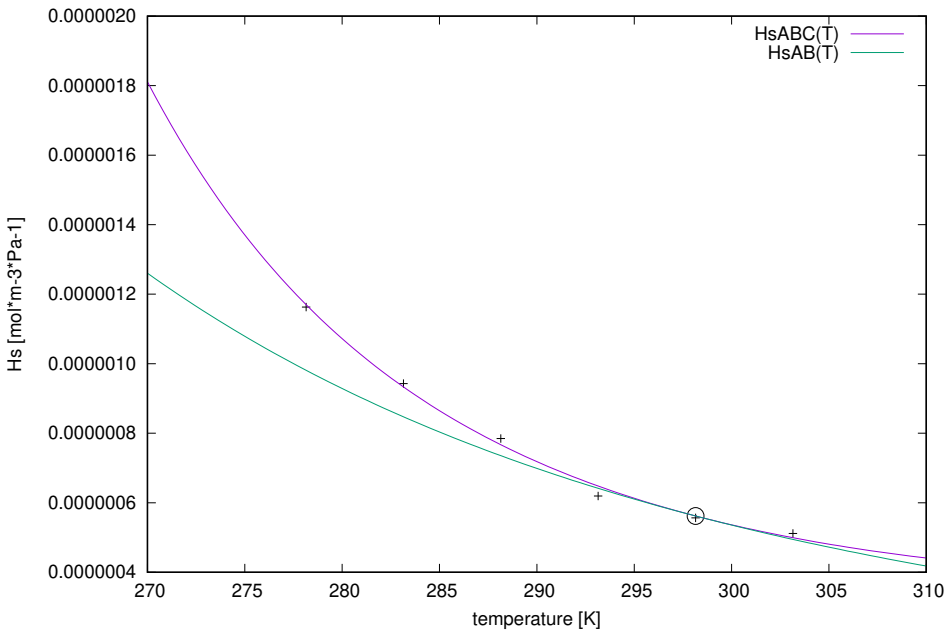

ref = 2484; chem = octafluoropropane; casrn = 76-19-7; r2 = 0.90740

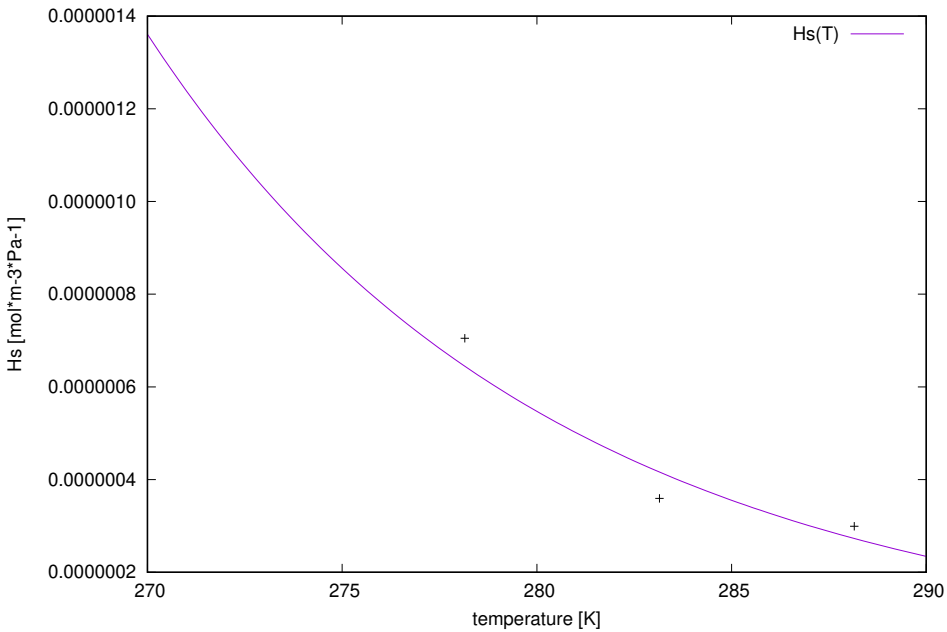



ref = 2485; chem = octafluorocyclobutane; casrn = 115-25-3; r2 = 1.00000

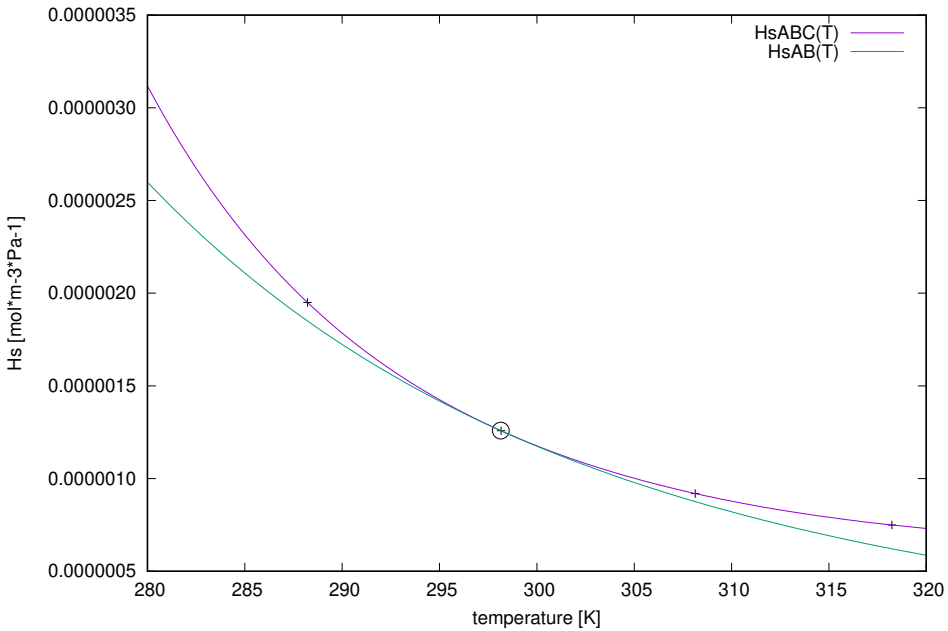

ref = 2485; chem = dichlorodifluoromethane; casrn = 75-71-8; r2 = 0.99933

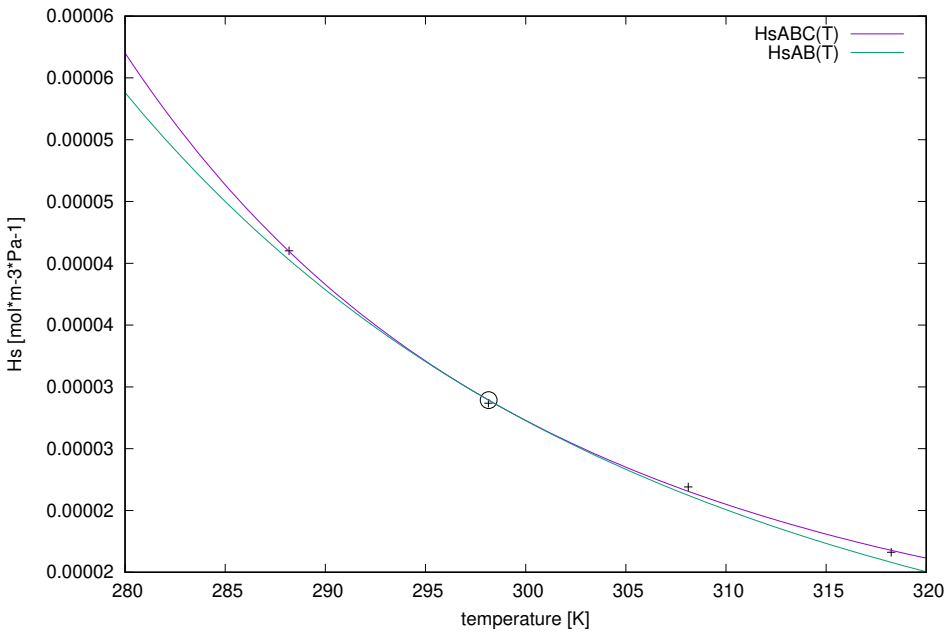

ref = 2485; chem = chlorotrifluoromethane; casrn = 75-72-9; r2 = 0.99955

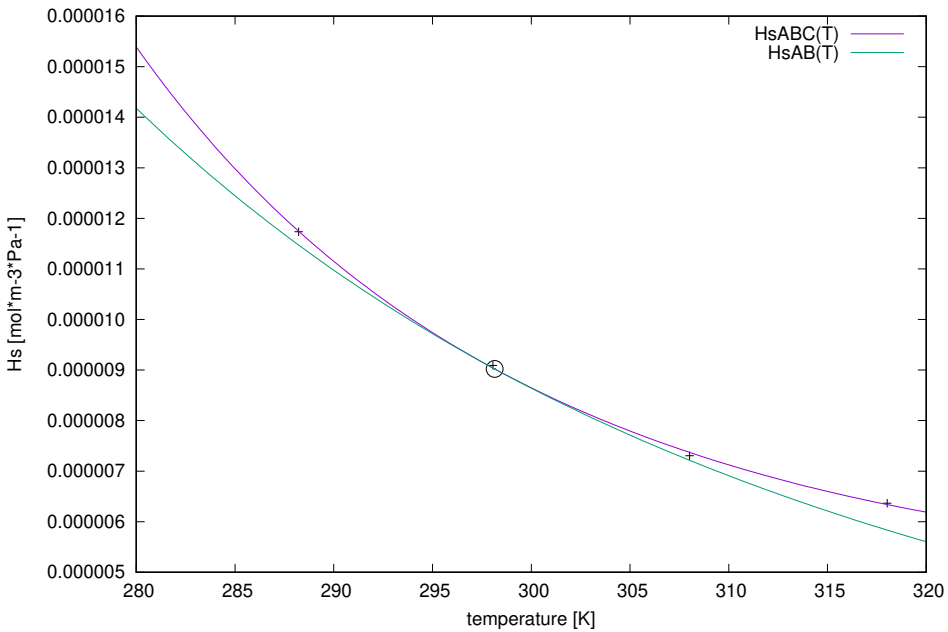

ref = 2485; chem = tetrafluoromethane; casrn = 75-73-0; r2 = 0.99892

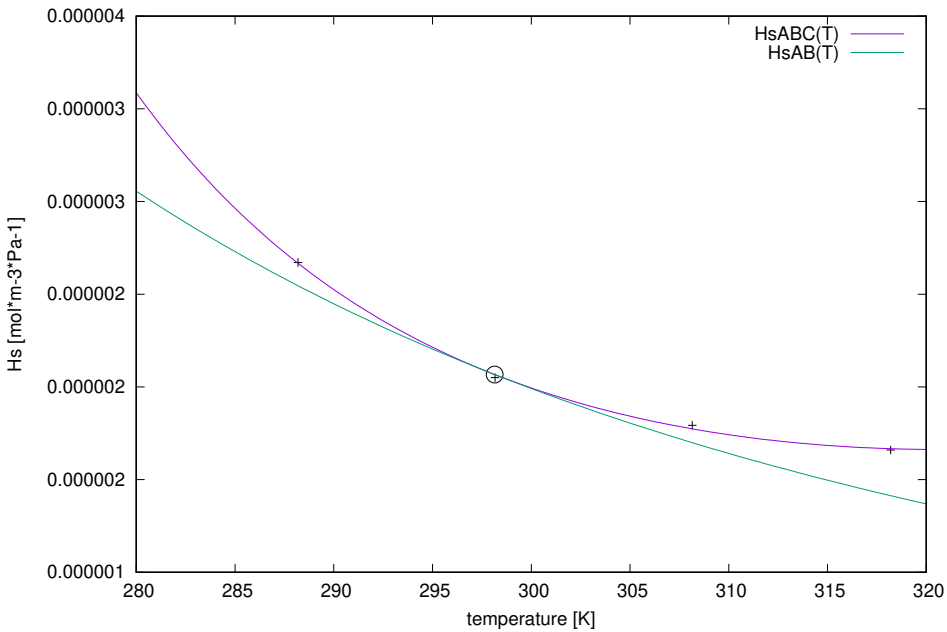

ref = 2489; chem = anthracene; casrn = 120-12-7; r2 = 0.99883

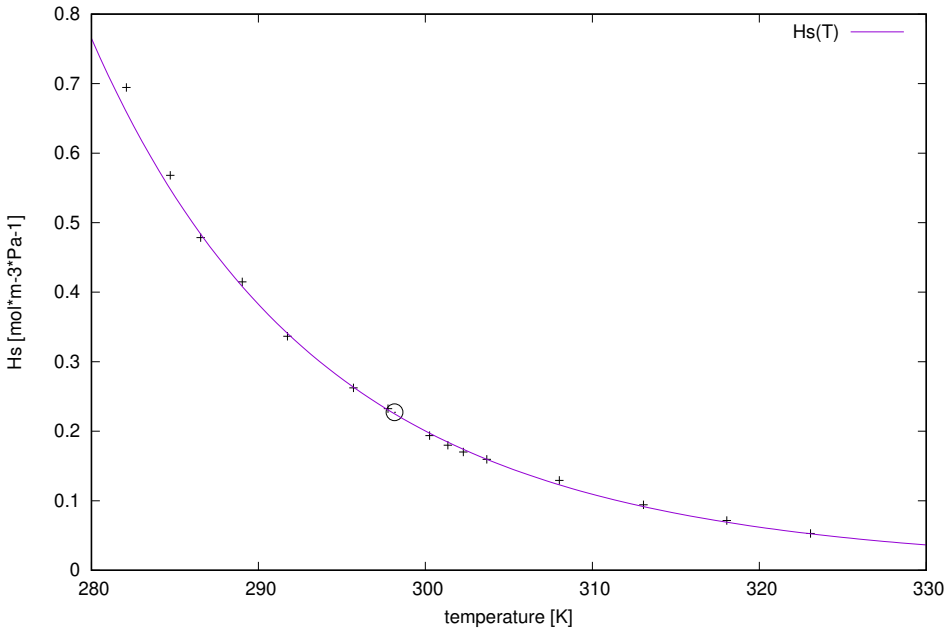

ref = 2489; chem = pyrene; casrn = 129-00-0; r2 = 0.99883

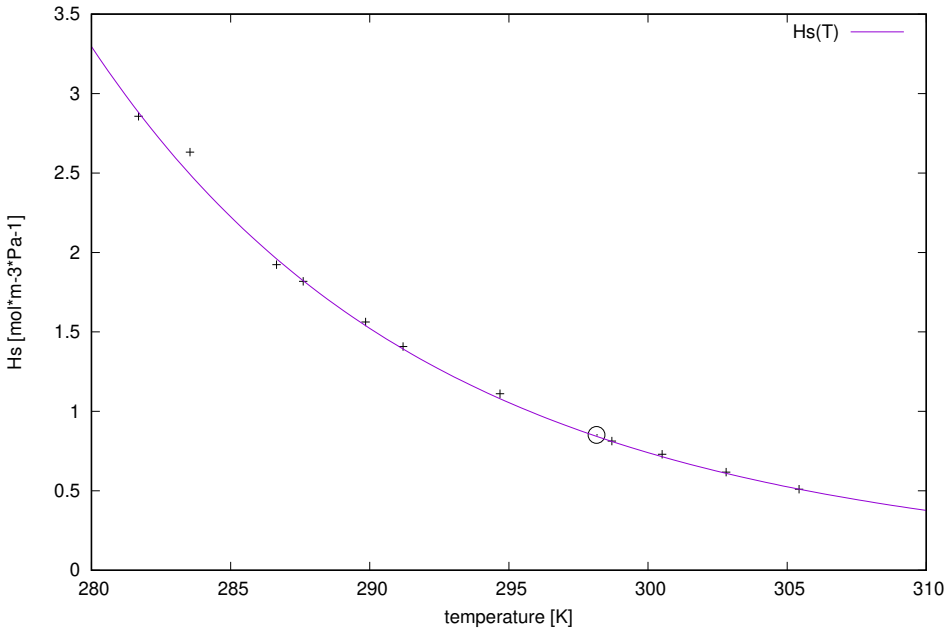

ref = 2489; chem = 9,10-dihydrophenanthrene; casrn = 776-35-2; r2 = 0.99836

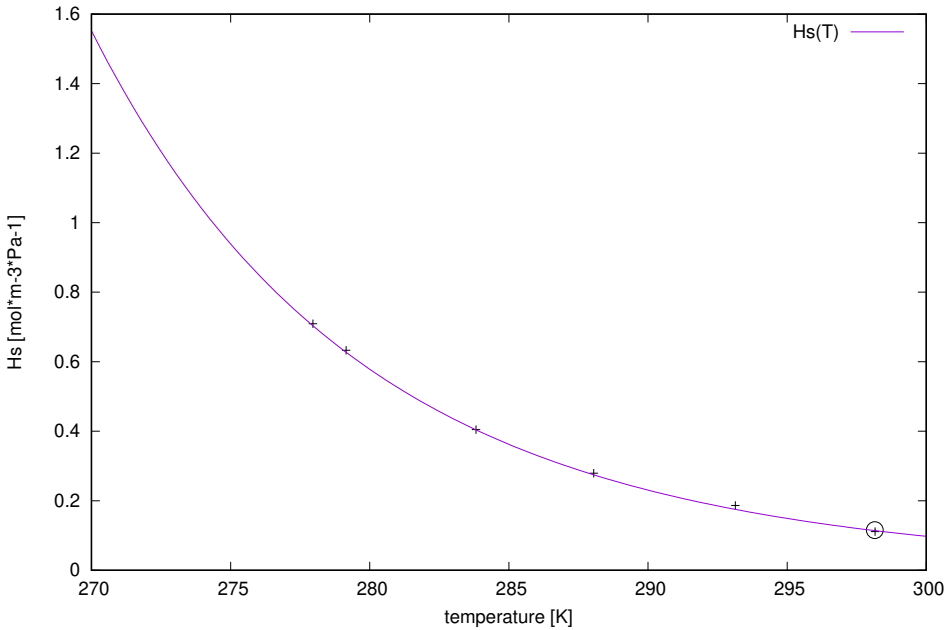

ref = 2496; chem = 4-bromodiphenyl ether; casrn = 101-55-3; r2 = 0.97972

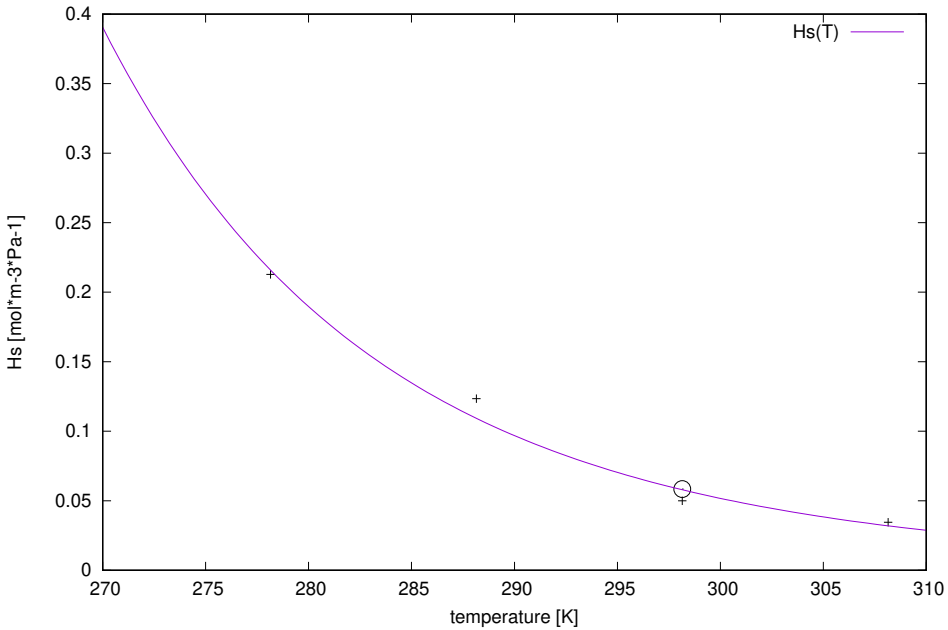



ref = 2496; chem = 2,2',4,4',6-pentabromodiphenyl ether; casrn = 189084-64-8; r2 = 0.00000

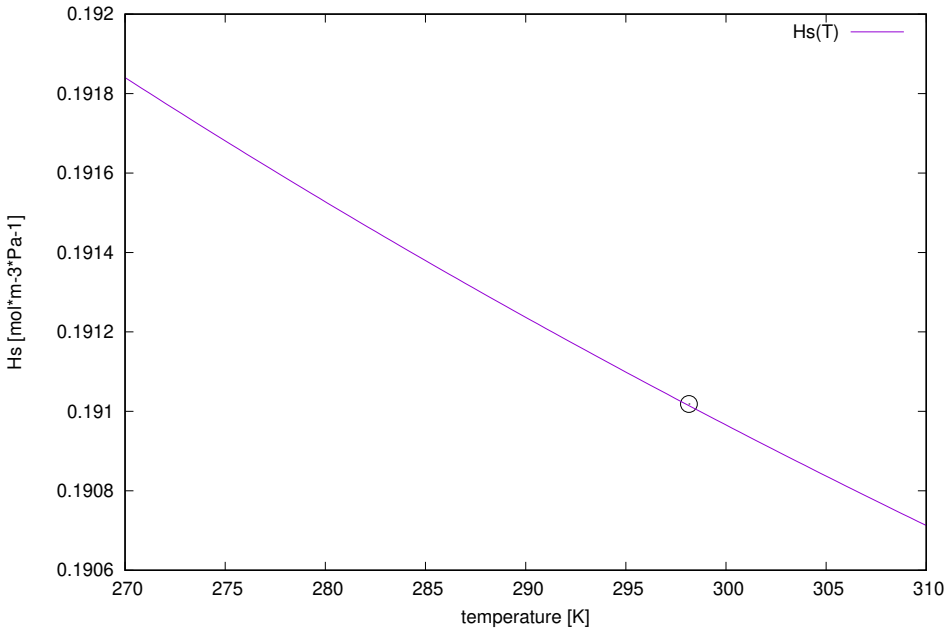

ref = 2496; chem = 4,4'-dibromodiphenyl ether; casrn = 2050-47-7; r2 = 0.98277

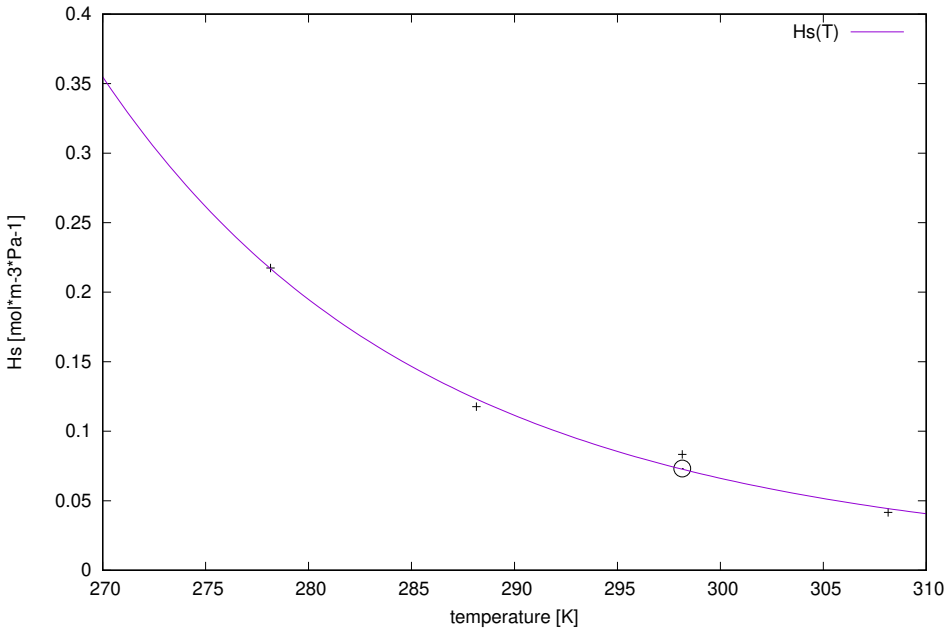

ref = 2496; chem = 4,4'-dichlorobiphenyl; casrn = 2050-68-2; r2 = 0.86096

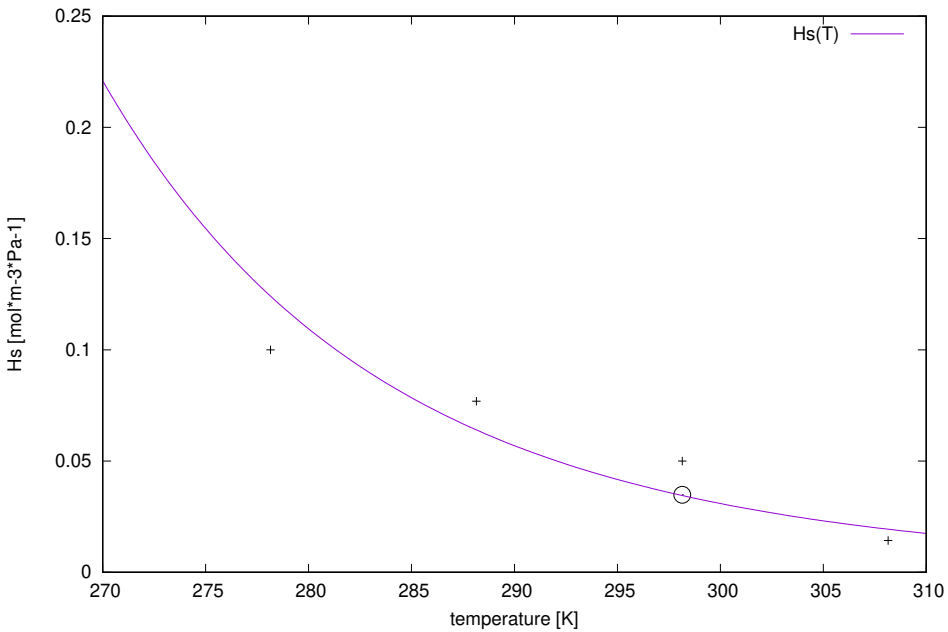

ref = 2496; chem = 2-chlorobiphenyl; casrn = 2051-60-7; r2 = 0.99761

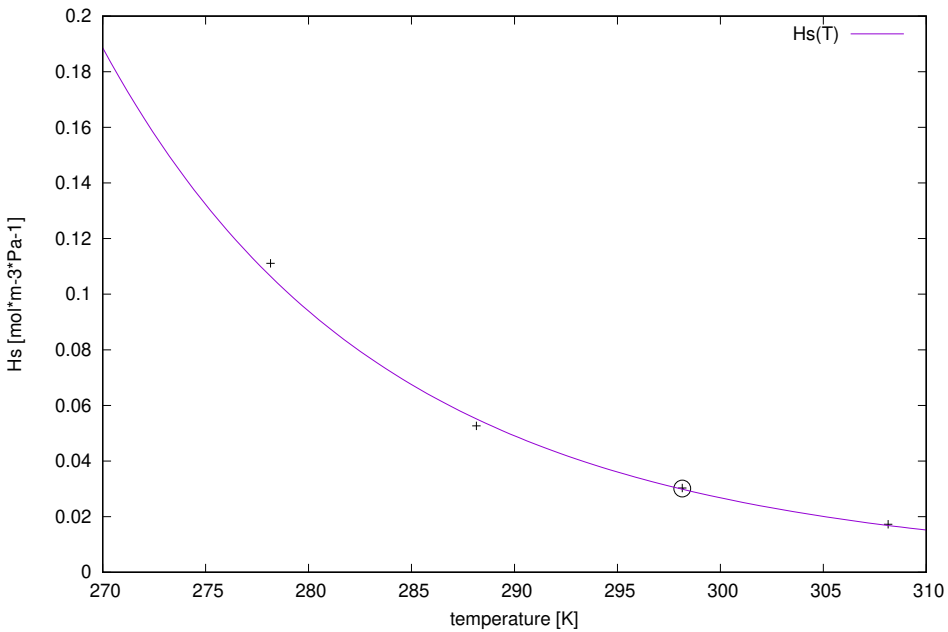

ref = 2496; chem = 4-chlorobiphenyl; casrn = 2051-62-9; r2 = 0.99980

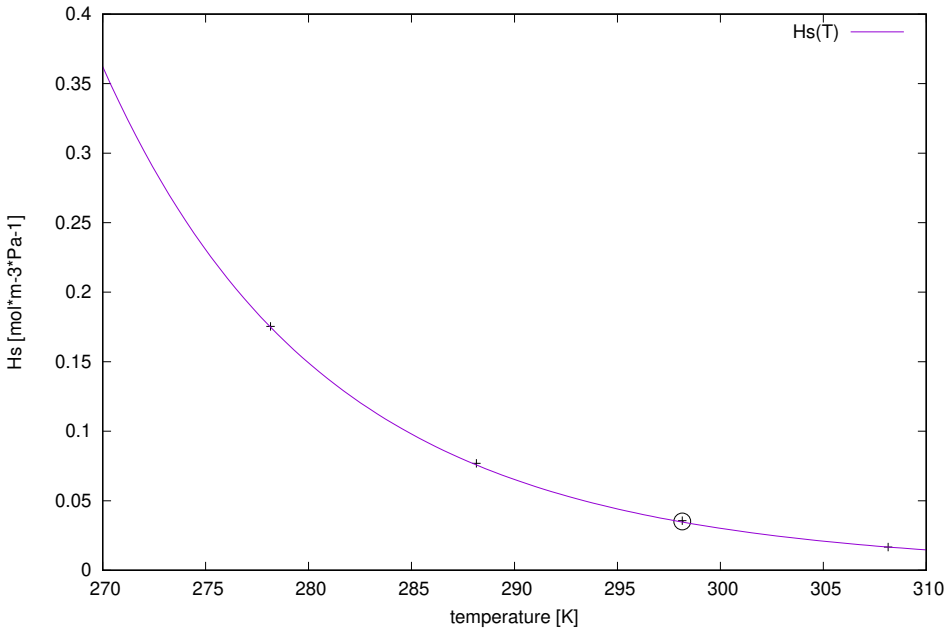

ref = 2496; chem = 2,2',4,4'-tetrachlorobiphenyl; casrn = 2437-79-8; r2 = 0.94571

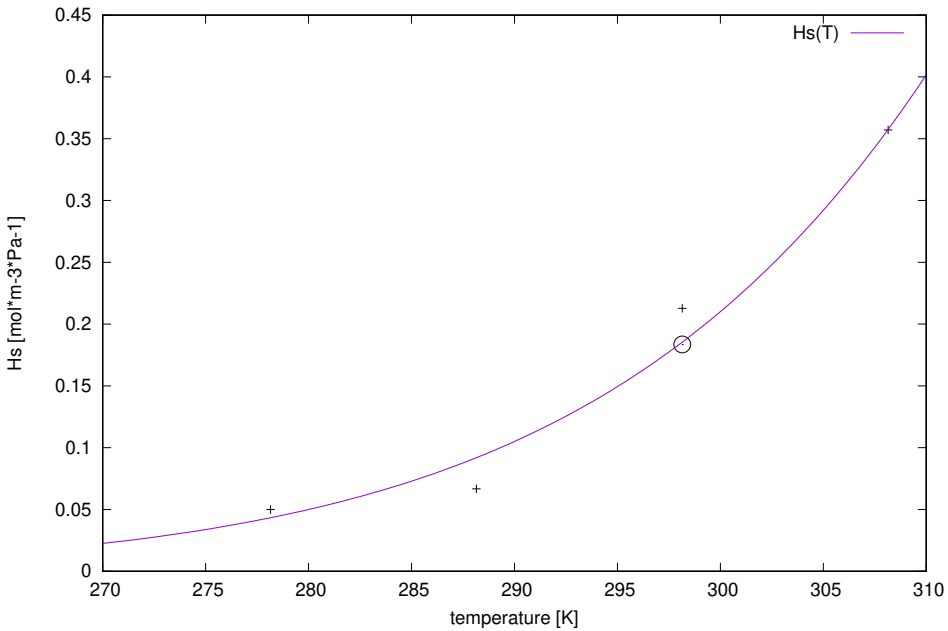

ref = 2496; chem = 2,3',4,4',5-pentachlorobiphenyl; casrn = 31508-00-6; r2 = 0.74654

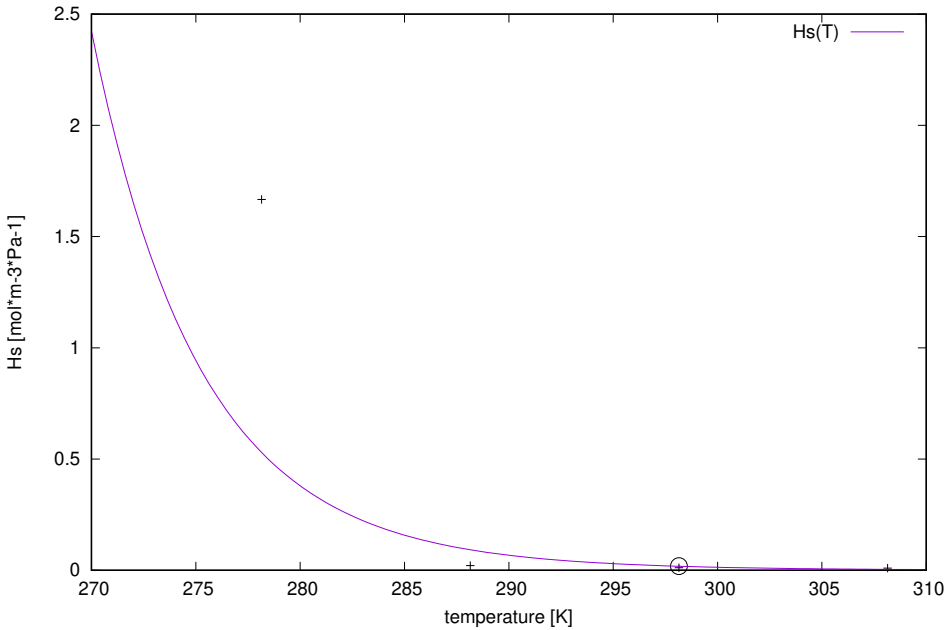

ref = 2496; chem = 3,3',4,4'-tetrachlorobiphenyl; casrn = 32598-13-3; r2 = 0.85100

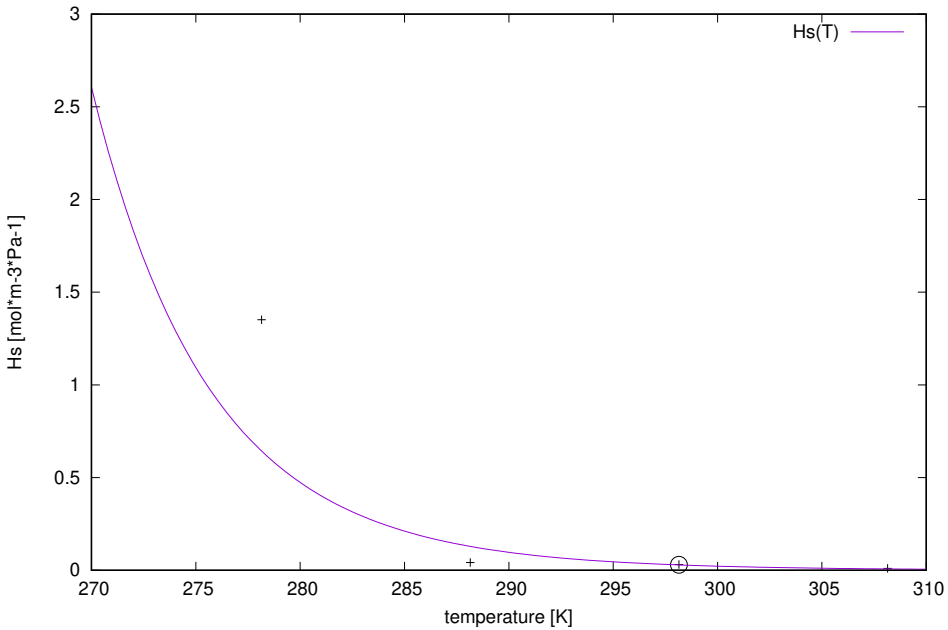



ref = 2496; chem = 2,4'-dichlorobiphenyl; casrn = 34883-43-7; r2 = 0.96199

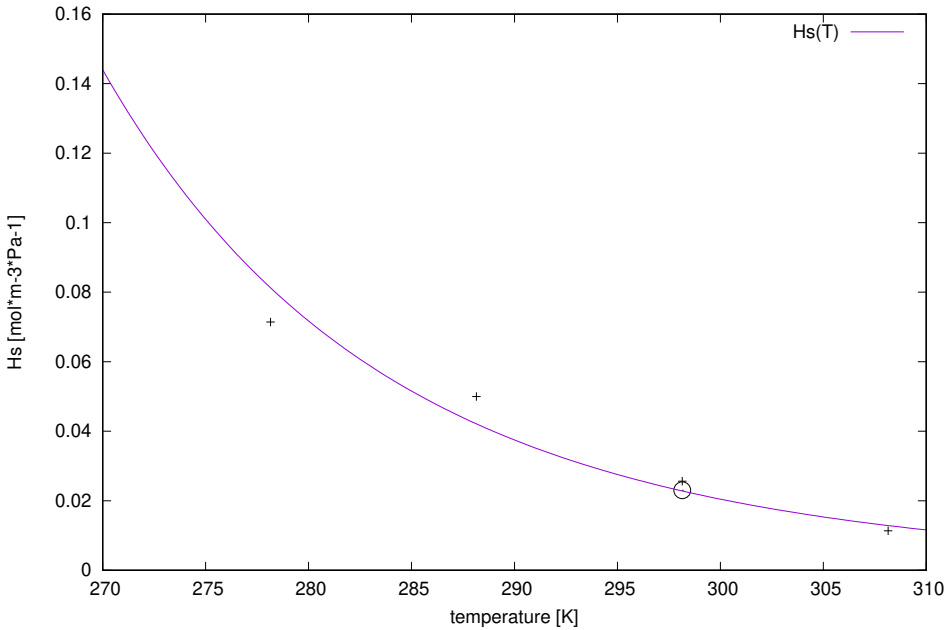

ref = 2496; chem = 2,2',4,4',5-pentachlorobiphenyl; casrn = 38380-01-7; r2 = 0.62073

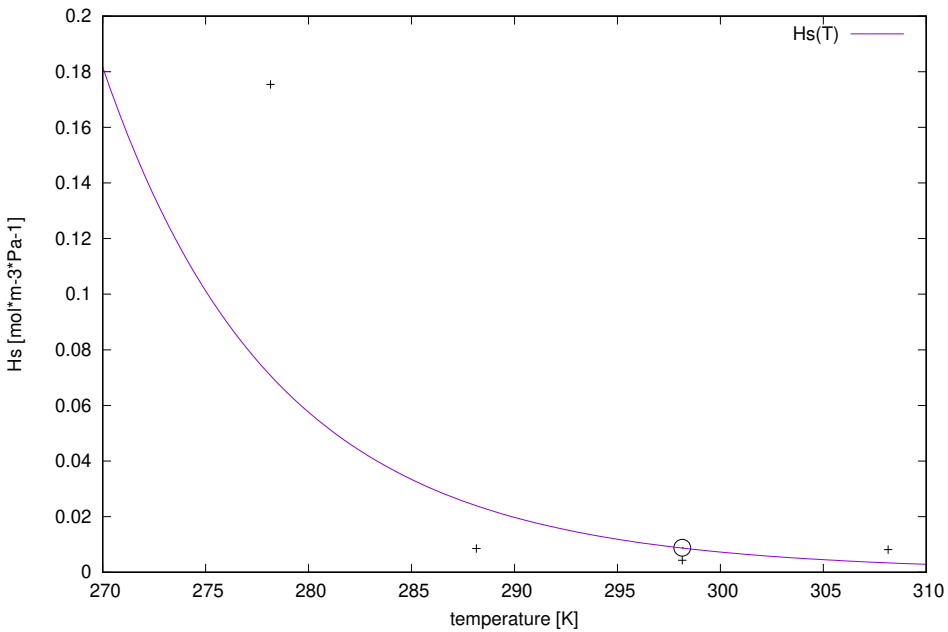

ref = 2496; chem = 2,4,4'-tribromodiphenyl ether; casrn = 41318-75-6; r2 = 0.71730

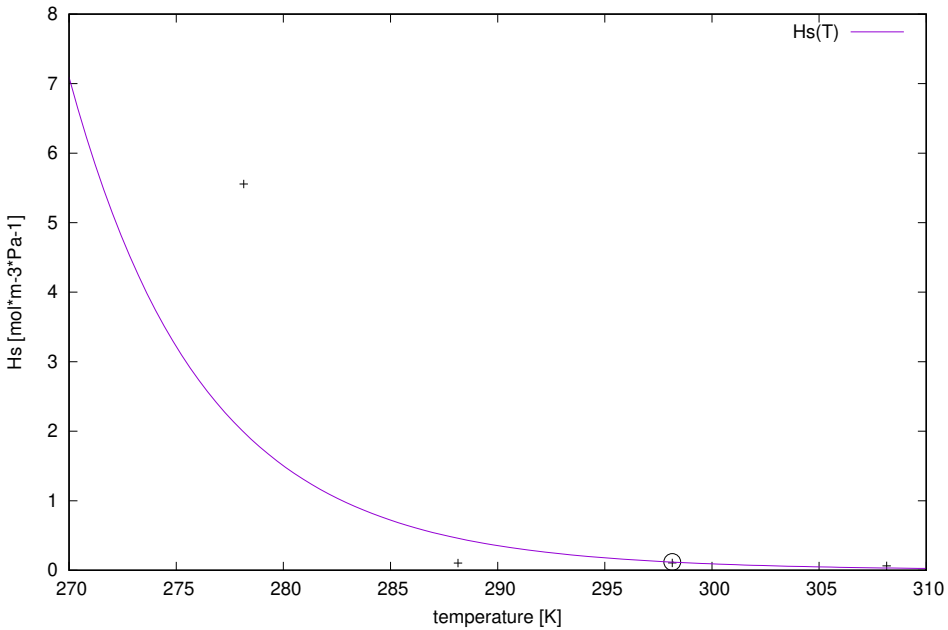

ref = 2496; chem = 2,3',4,4',5-Pentabromodiphenyl ether; casrn = 446254-77-9; r2 = 0.22854

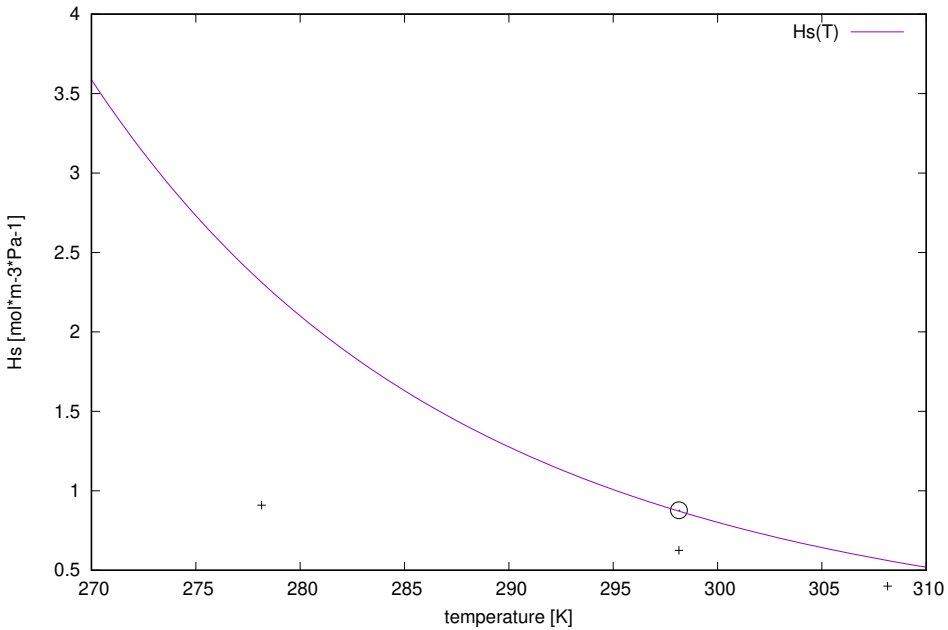

ref = 2496; chem = 2,2',4,4'-tetrabromodiphenyl ether; casrn = 5436-43-1; r2 = 0.01789

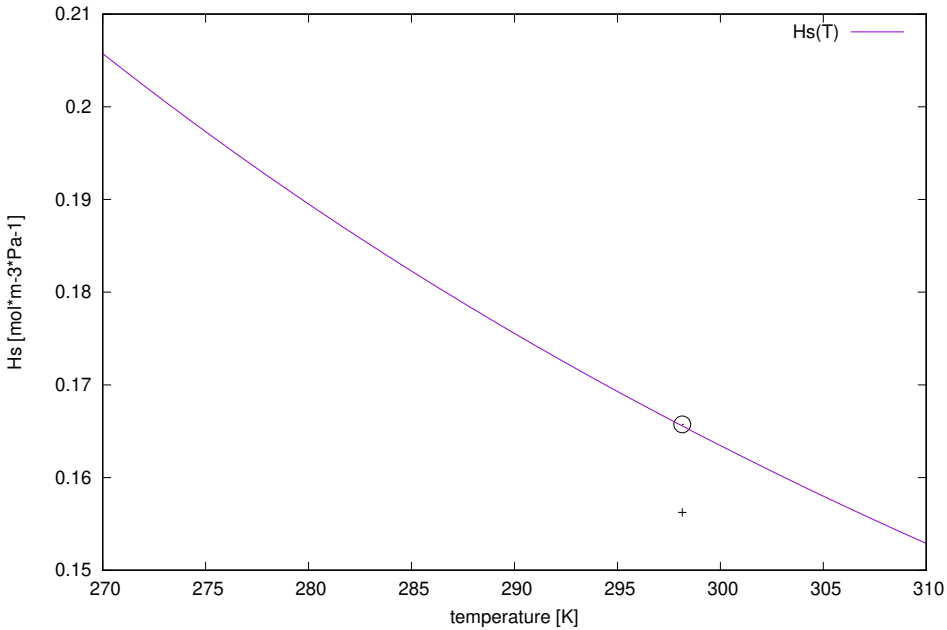

ref = 2496; chem = 2,2',4,4',5-pentabromodiphenyl ether; casrn = 60348-60-9; r2 = 0.44631

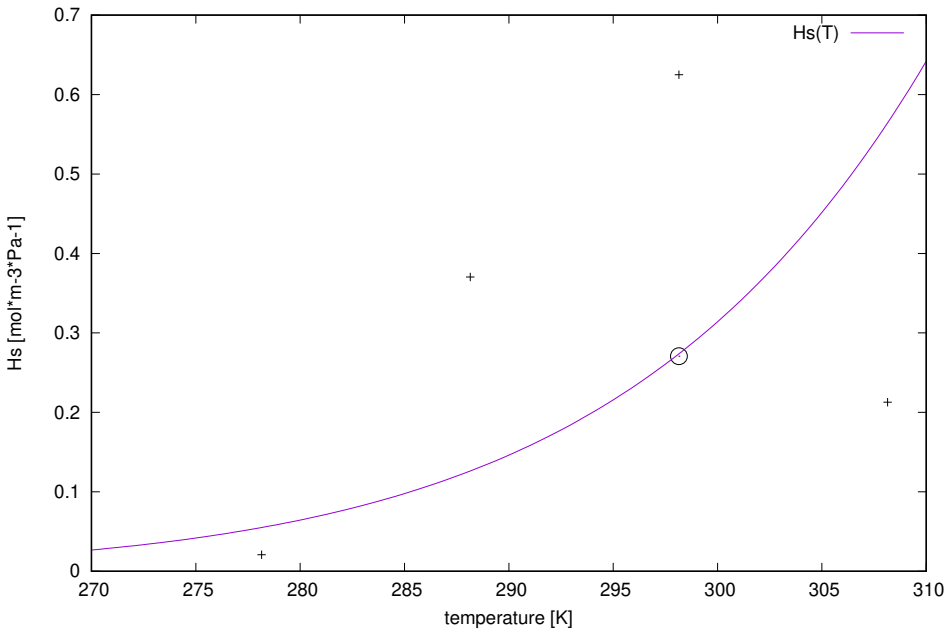

ref = 2496; chem = 2,4,4'-trichlorobiphenyl; casrn = 7012-37-5; r2 = 0.62703

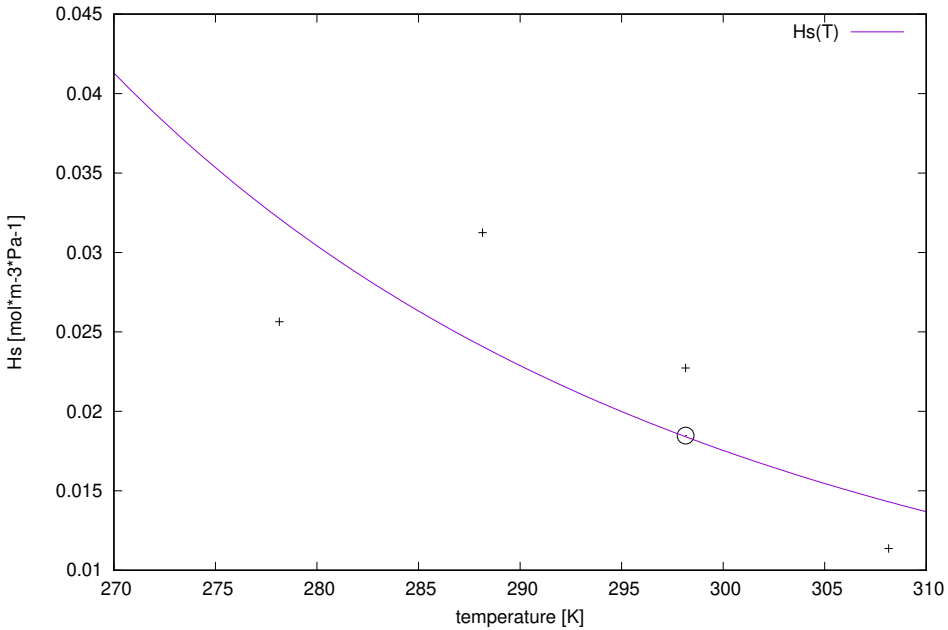

ref = 2534; chem = oxirane; casrn = 75-21-8; r2 = 0.99964

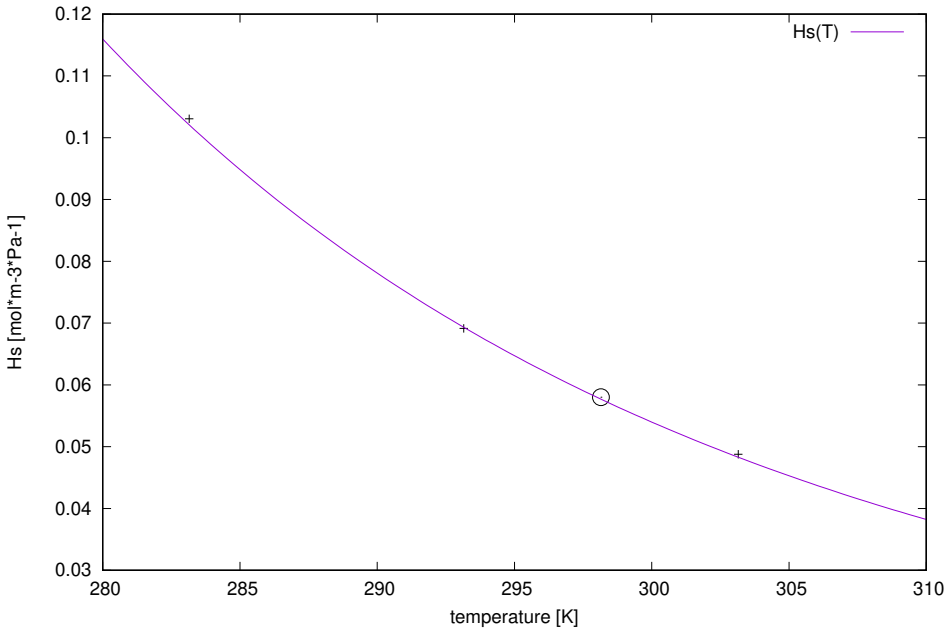



ref = 2551; chem = 1-butyne; casrn = 107-00-6; r2 = 0.96861

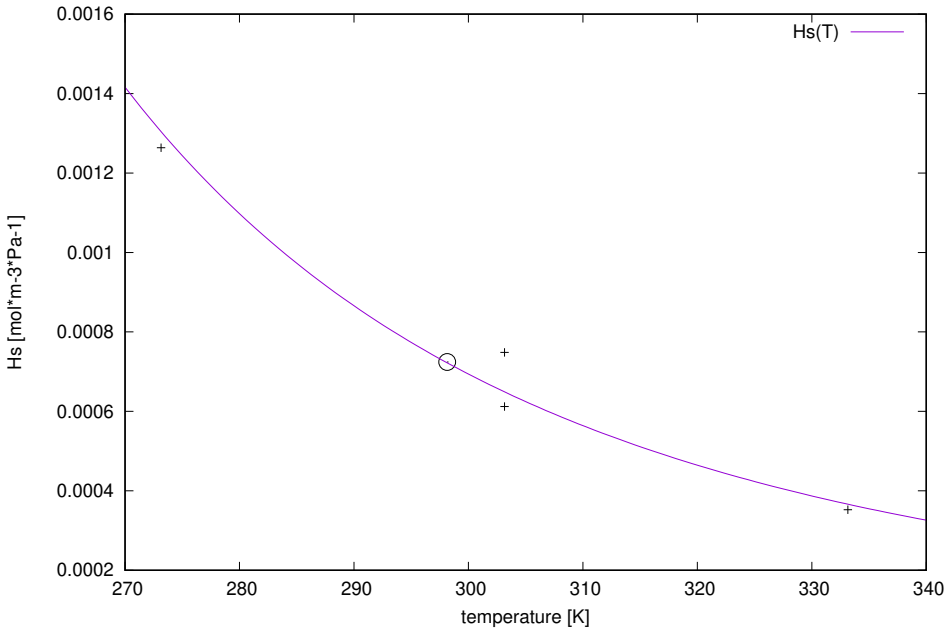

ref = 2551; chem = 3-buten-1-yne; casrn = 689-97-4; r2 = 0.99889

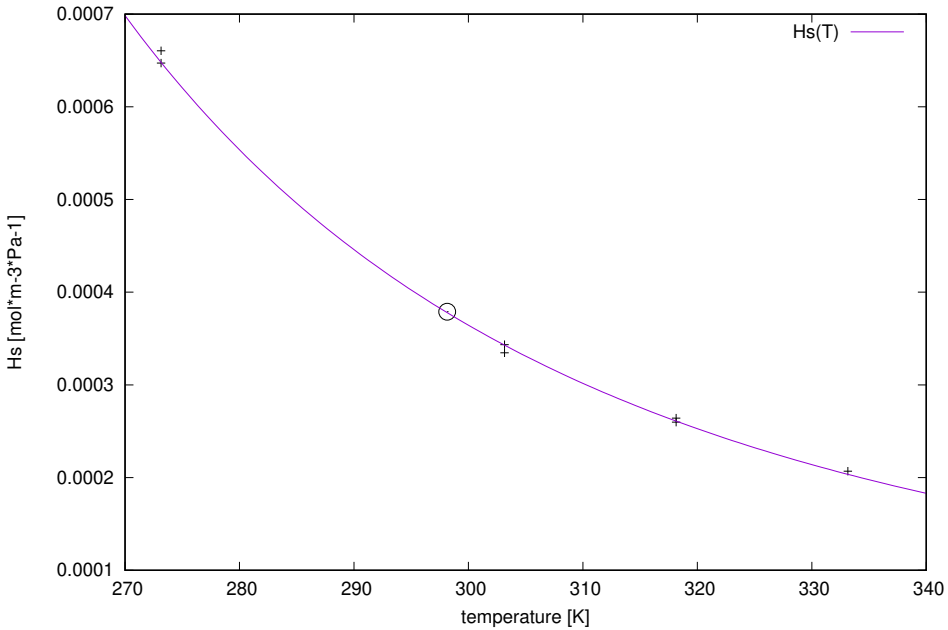

ref = 2551; chem = propyne; casrn = 74-99-7; r2 = 0.99626

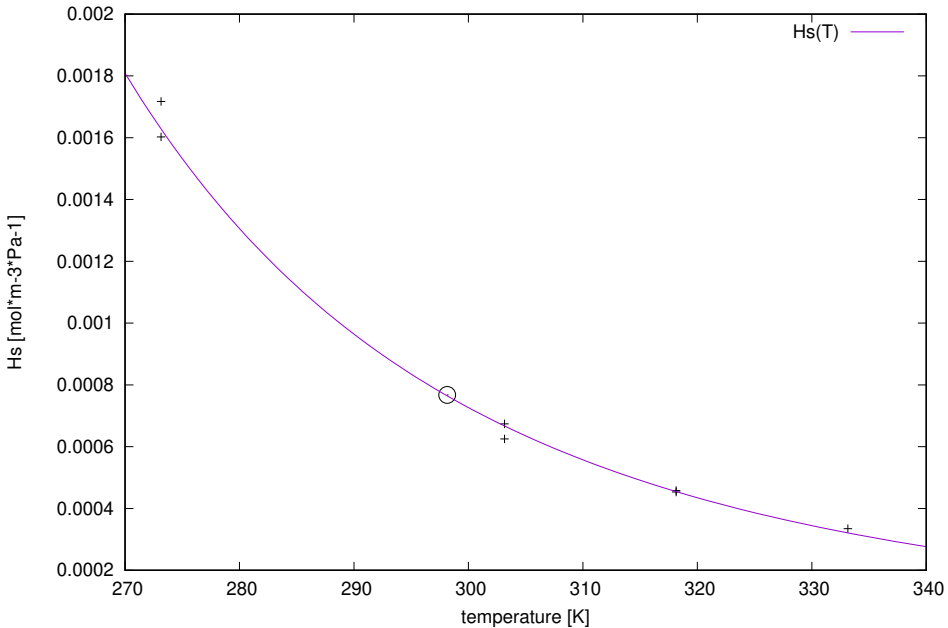

ref = 2552; chem = chlorofluoromethane; casrn = 593-70-4; r2 = 0.99449

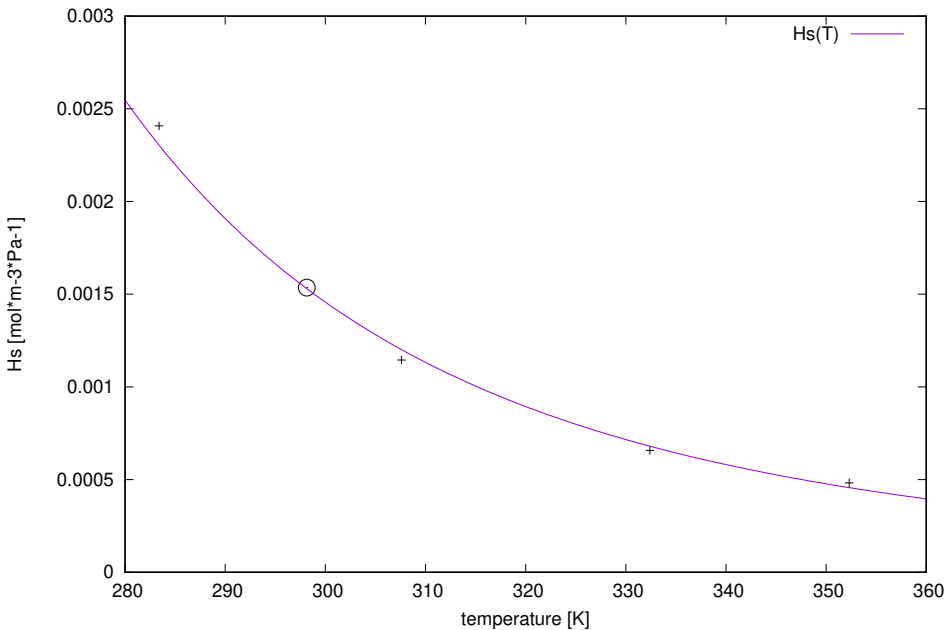

ref = 2552; chem = chloromethane; casrn = 74-87-3; r2 = 0.98342

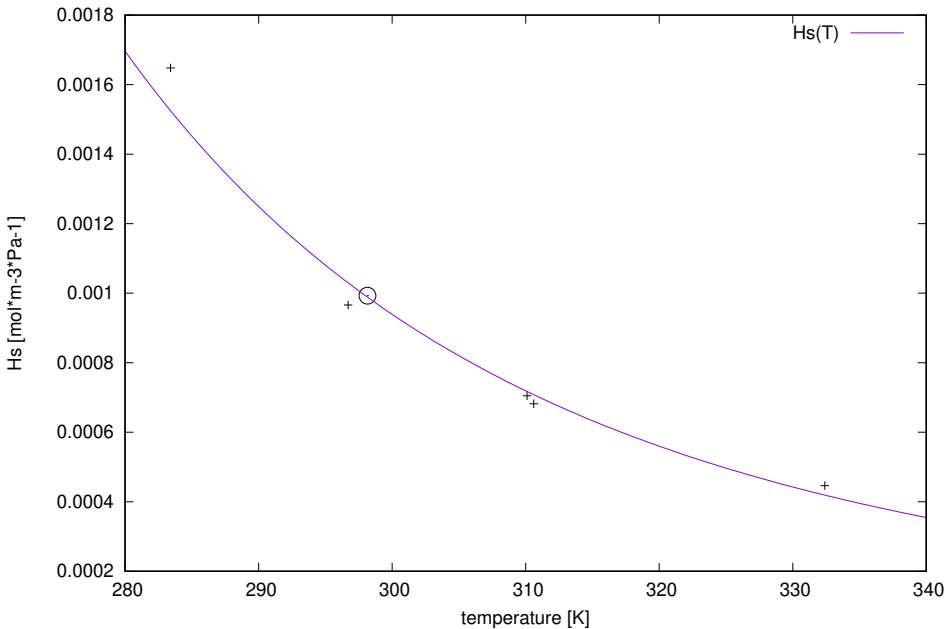

ref = 2552; chem = chlorodifluoromethane; casrn = 75-45-6; r2 = 0.97978

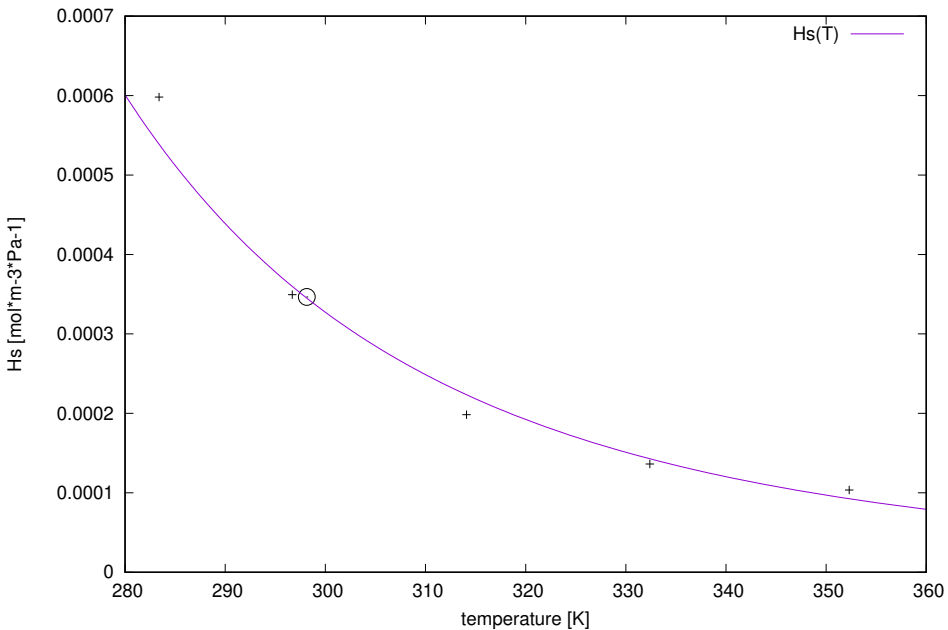

ref = 2570; chem = mercury dichloride; casrn = 7487-94-7; r2 = 1.00000

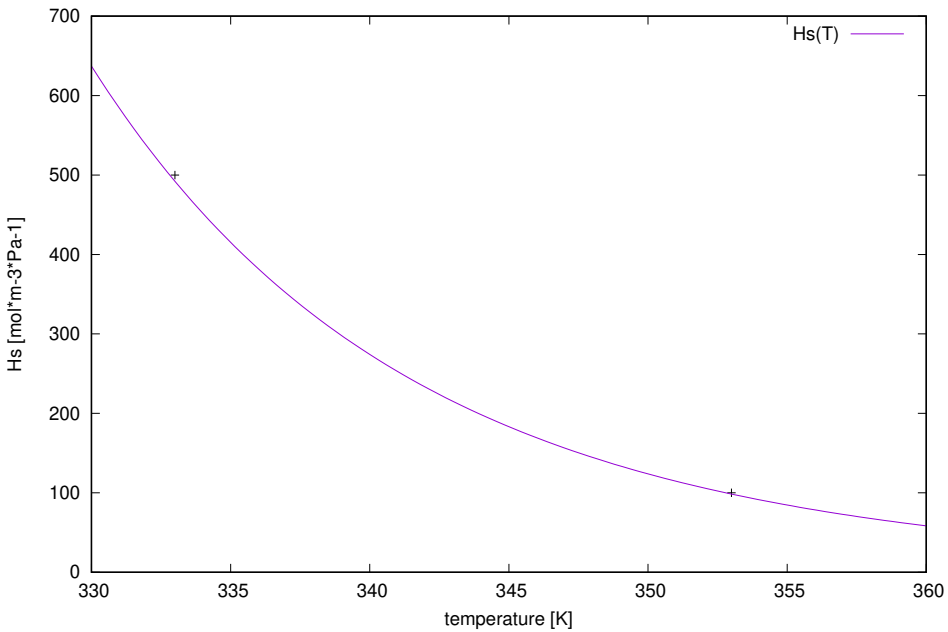

ref = 2576; chem = hydroxymethylmercury; casrn = 1184-57-2; r2 = 1.00000

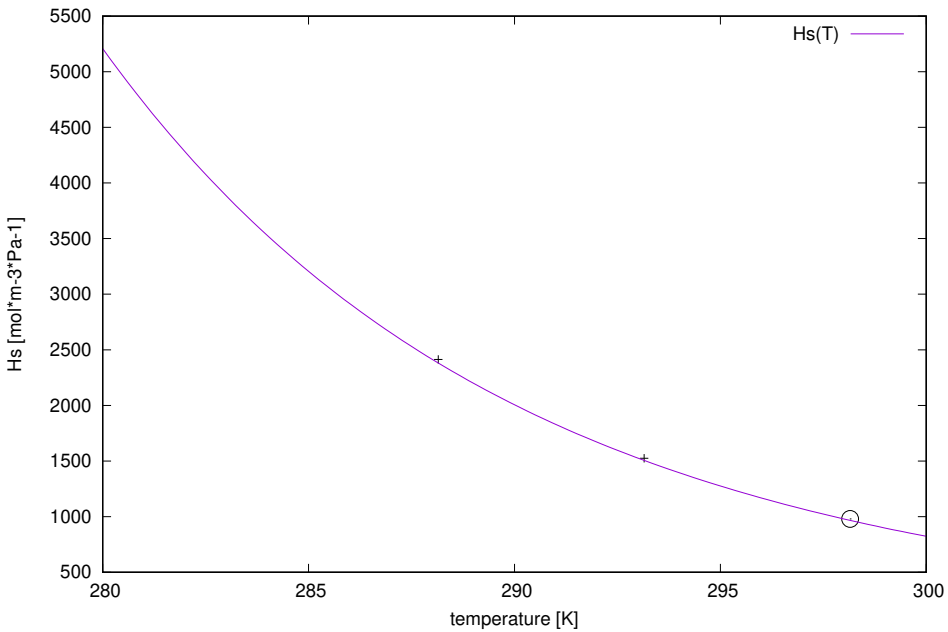



ref = 2610; chem = tetrafluoromethane; casrn = 75-73-0; r2 = 1.00000

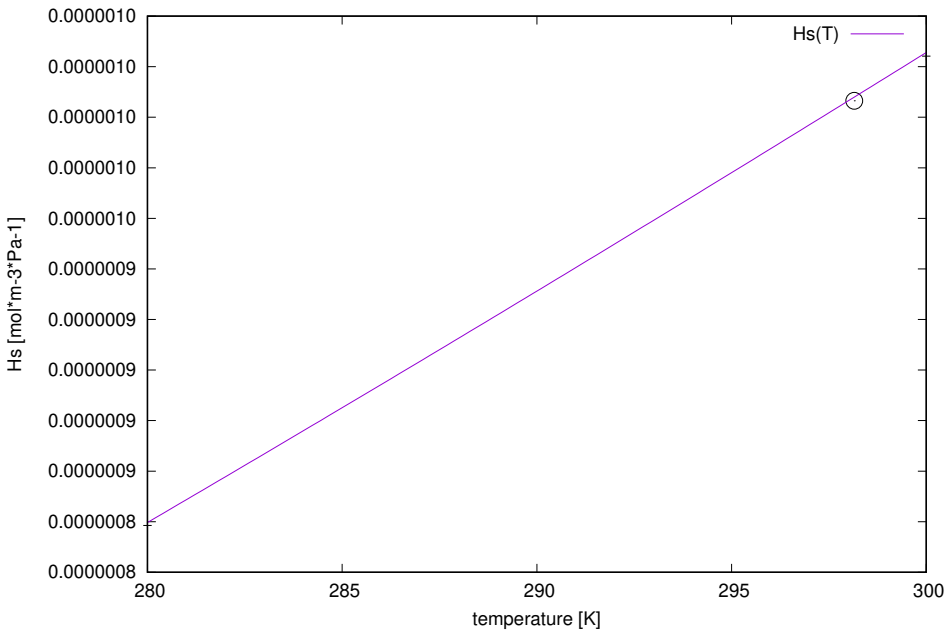

ref = 2610; chem = hexafluoroethane; casrn = 76-16-4; r2 = 1.00000

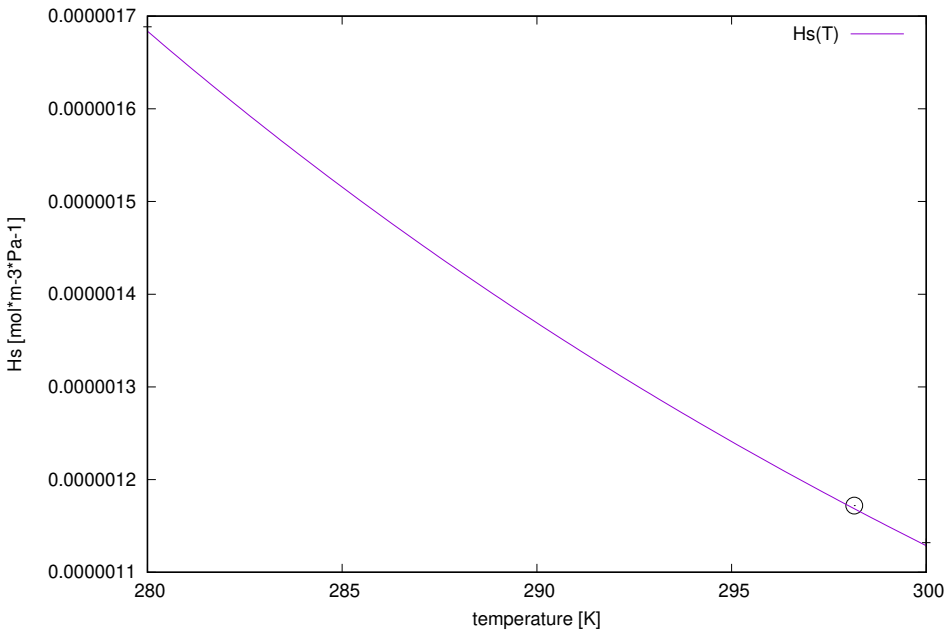

ref = 2631; chem = carbon disulfide; casrn = 75-15-0; r2 = 0.99530

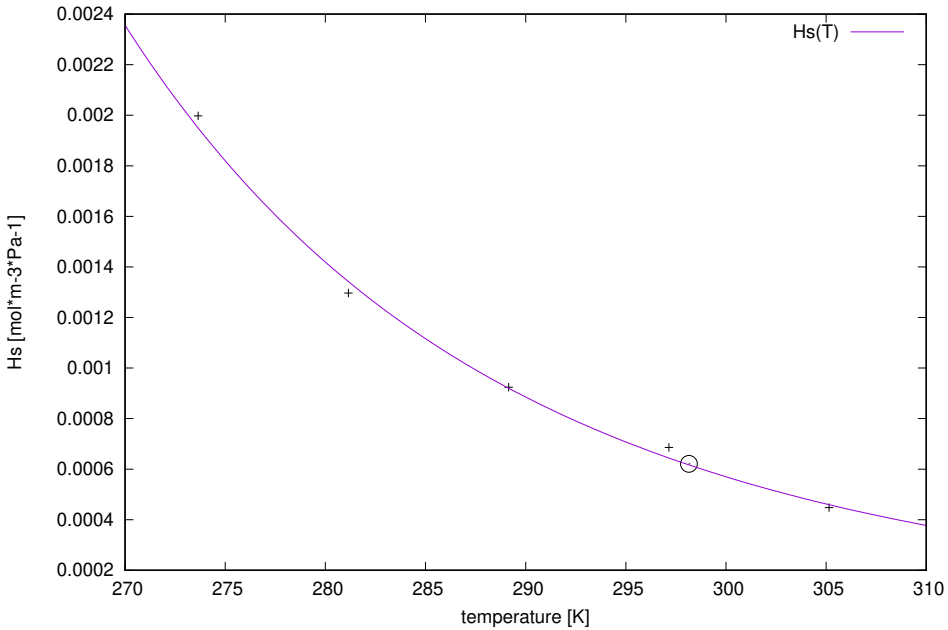

ref = 2645; chem = ethylbenzene; casrn = 100-41-4; r2 = 1.00000

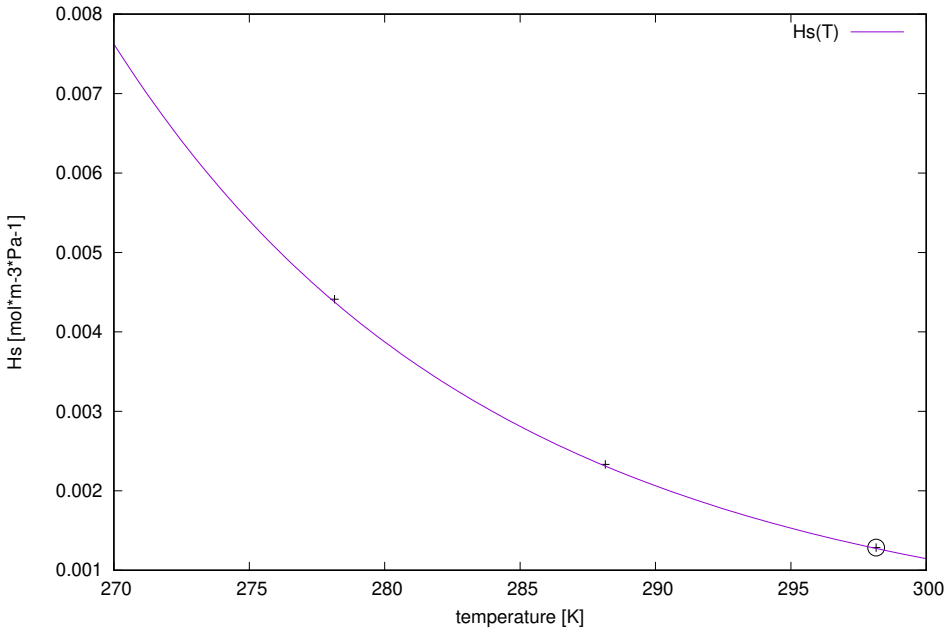

ref = 2645; chem = methylbenzene; casrn = 108-88-3; r2 = 1.00000

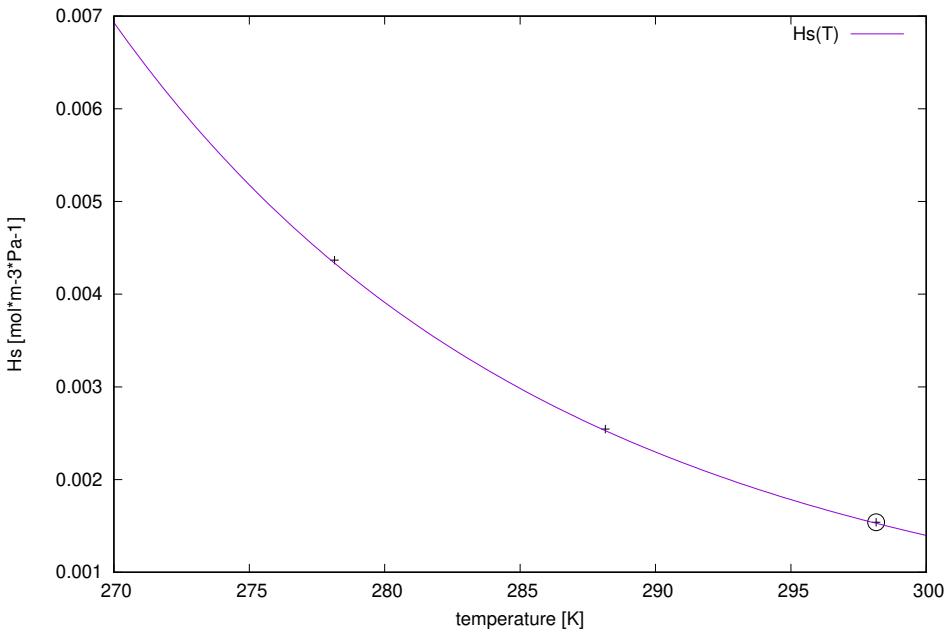

ref = 2645; chem = methyl tert-butyl ether; casrn = 1634-04-4; r2 = 0.99991

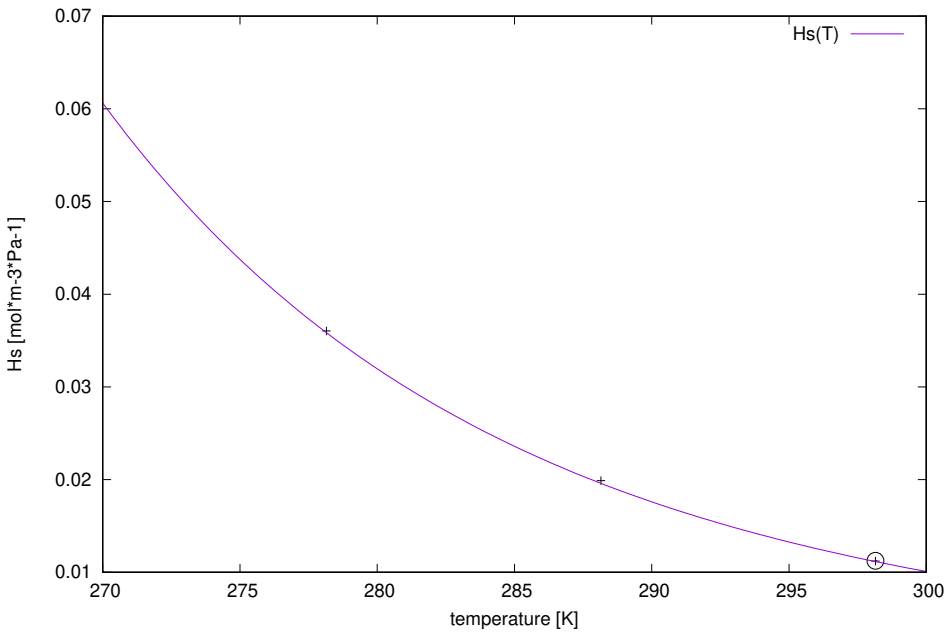

ref = 2645; chem = ethyl tert-butyl ether; casrn = 637-92-3; r2 = 0.99997

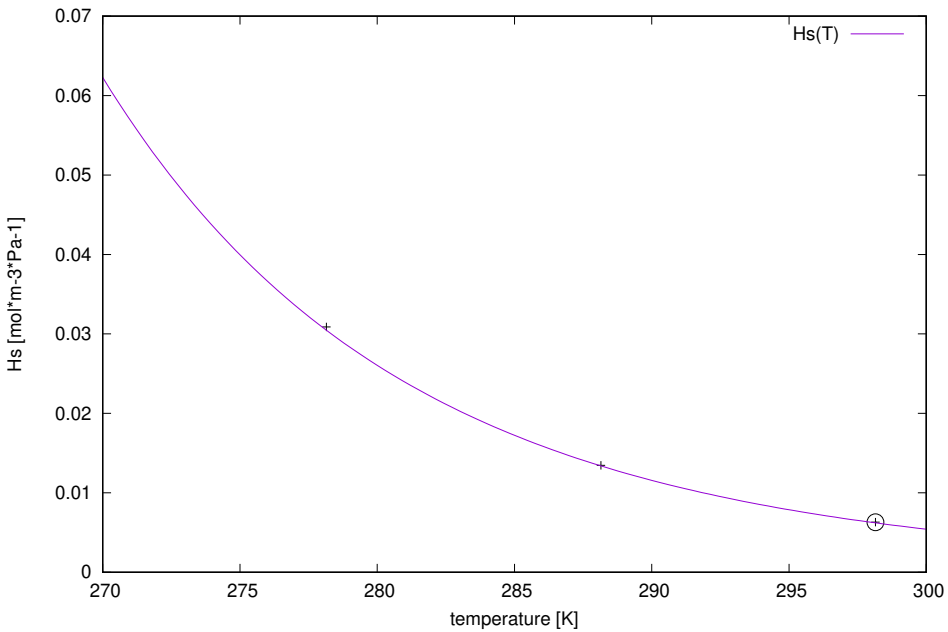

ref = 2645; chem = benzene; casrn = 71-43-2; r2 = 1.00000

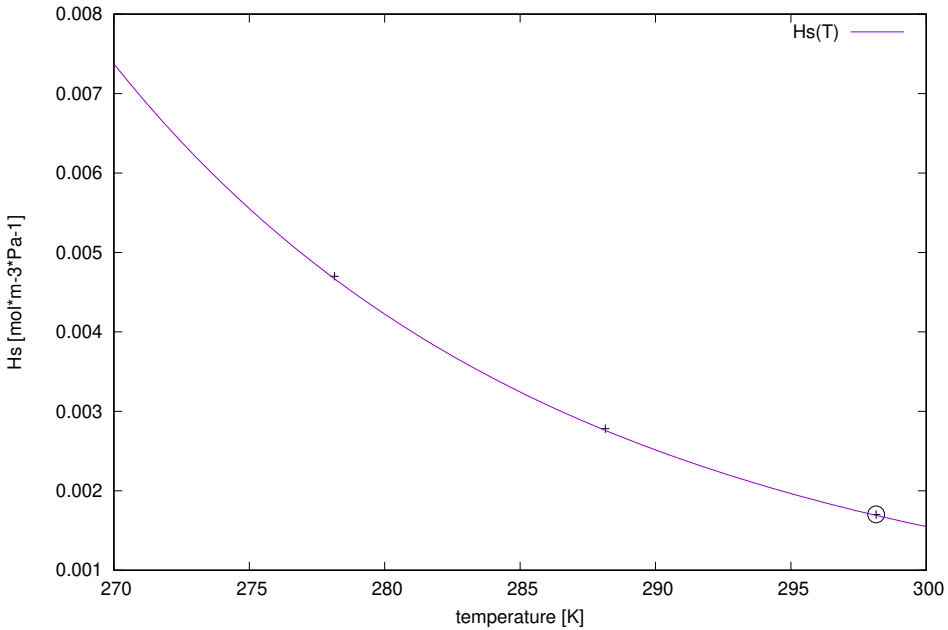



ref = 2645; chem = 1,2-dimethylbenzene; casrn = 95-47-6; r2 = 1.00000

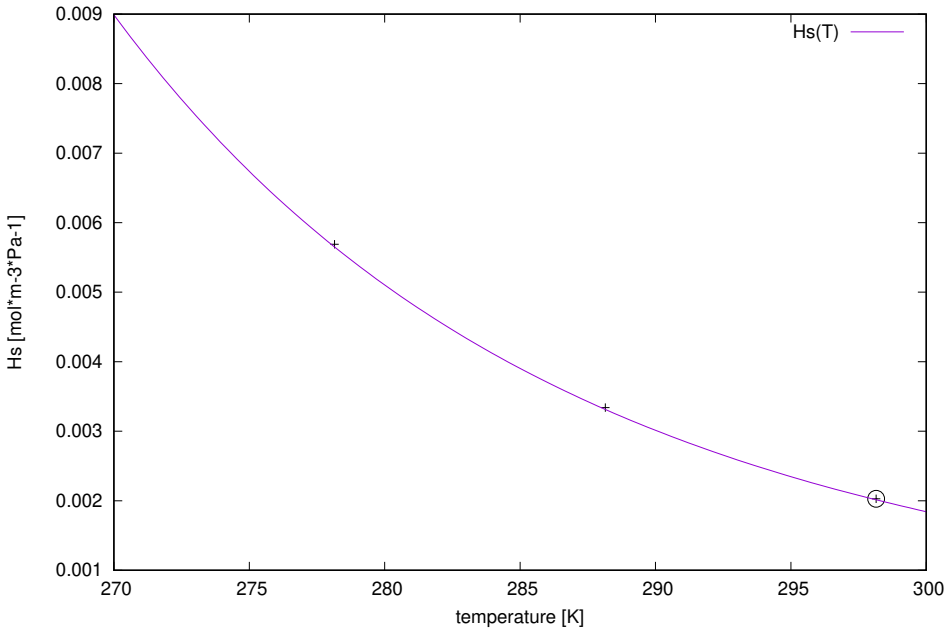

ref = 2647; chem = methyl tert-butyl ether; casrn = 1634-04-4; r2 = 0.97623

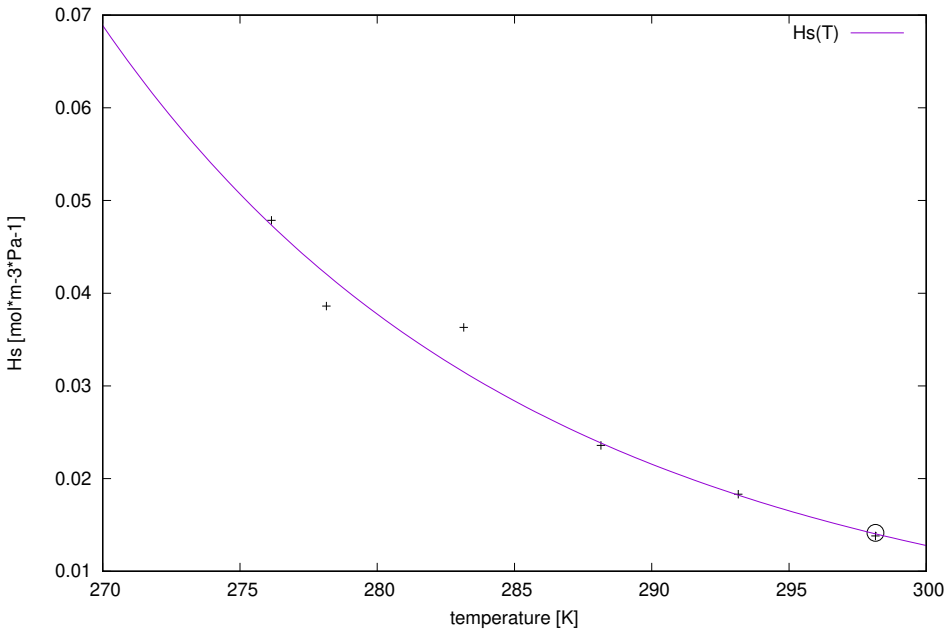

ref = 2808; chem = 2,2,3,3,3-pentafluoro-1-propanol; casrn = 422-05-9; r2 = 0.99989

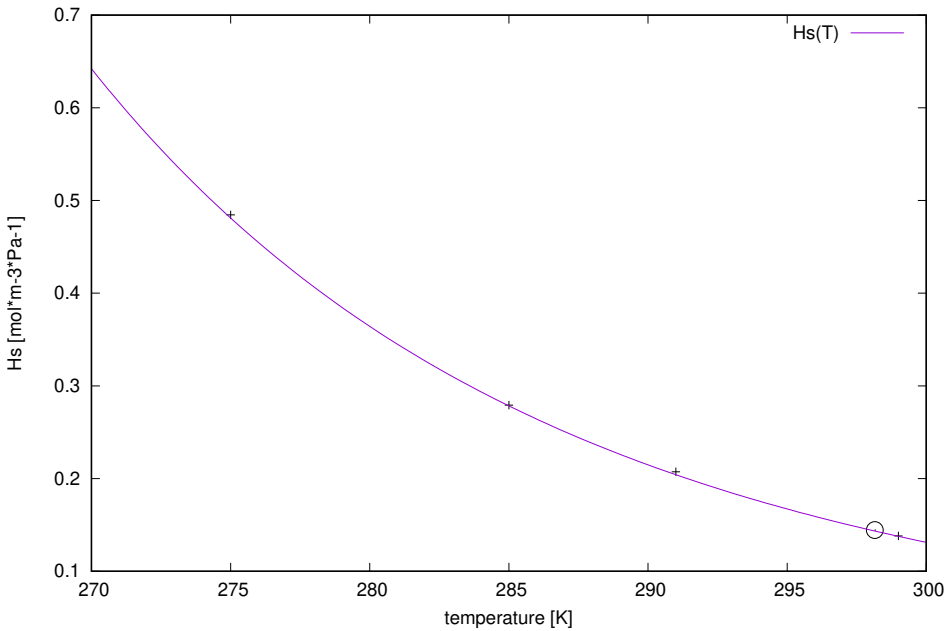

ref = 2808; chem = 2,2,2-trifluoroethanol; casrn = 75-89-8; r2 = 0.99934

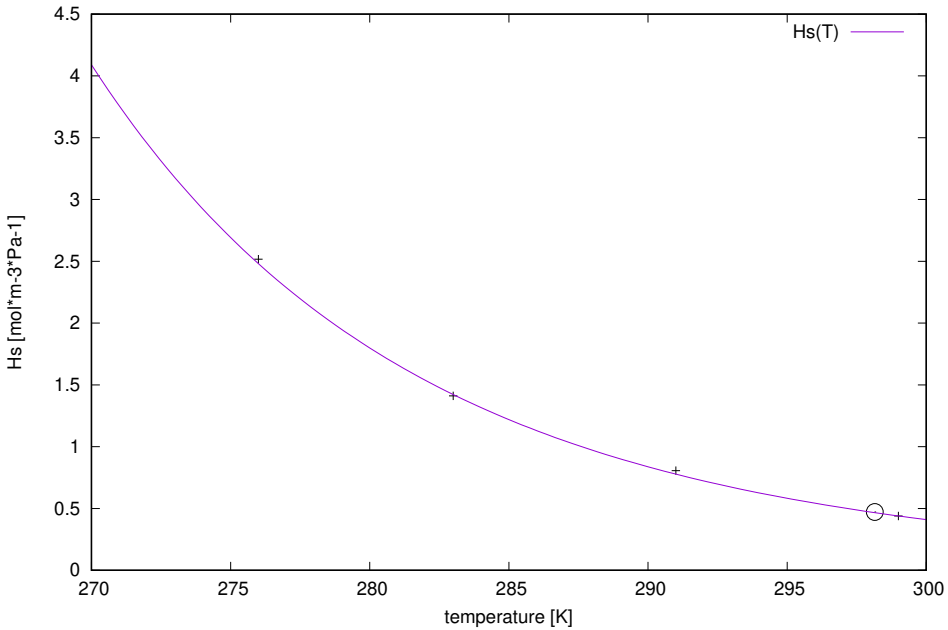

ref = 2808; chem = 2,2,3,3-tetrafluoro-1-propanol; casrn = 76-37-9; r2 = 0.99908

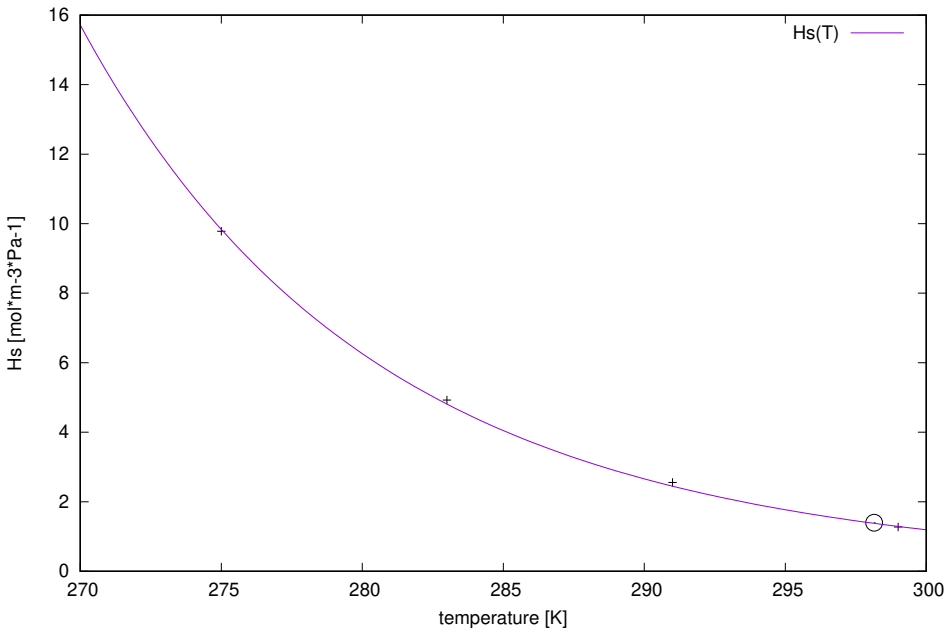

ref = 2820; chem = mercury; casrn = 7439-97-6; r2 = 0.99536

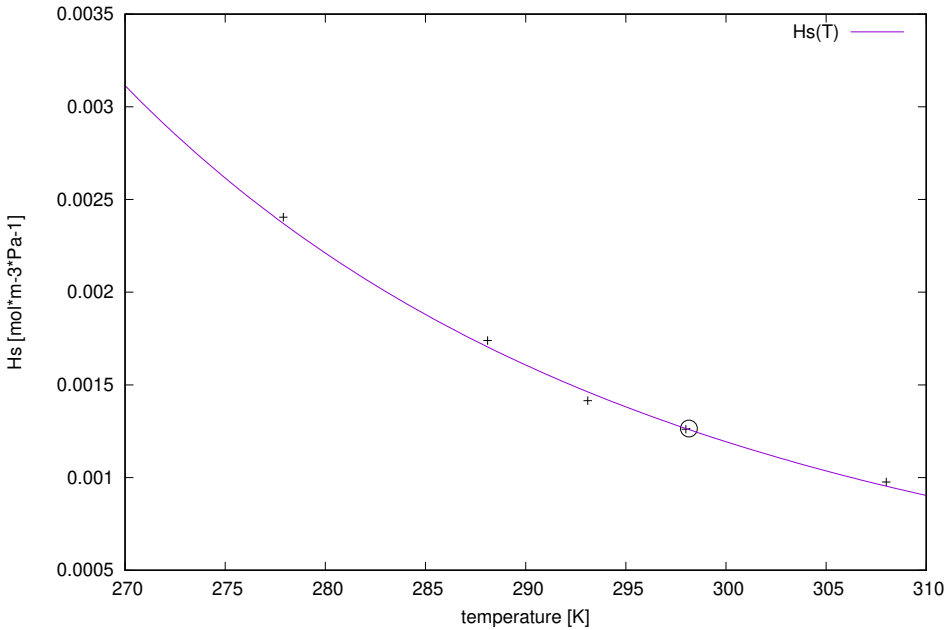

ref = 2825; chem = 2-pentanone; casrn = 107-87-9; r2 = 0.99992

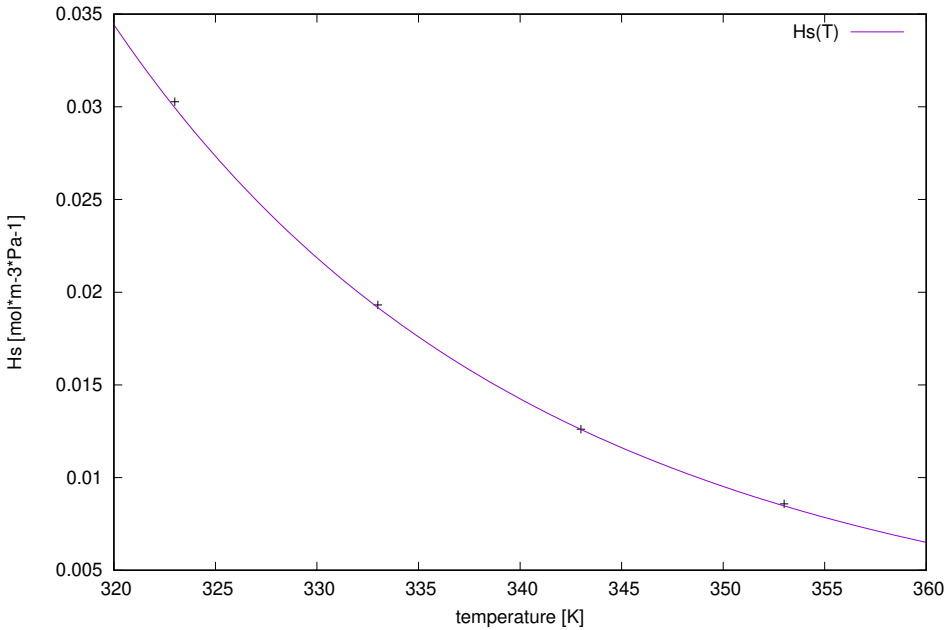

ref = 2825; chem = 2-heptanone; casrn = 110-43-0; r2 = 0.99691

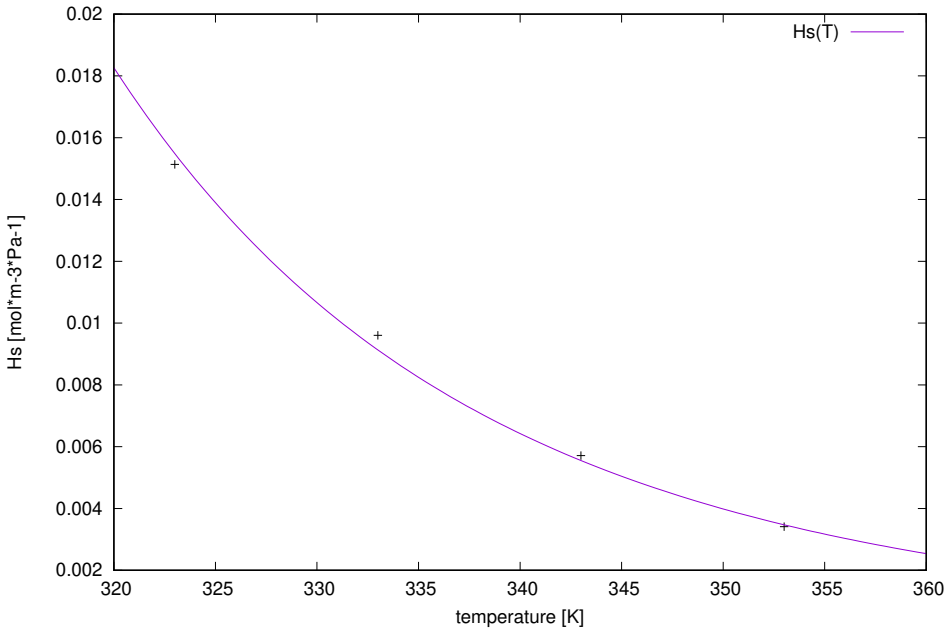



ref = 2825; chem = 2-hexanone; casrn = 591-78-6; r2 = 0.99693

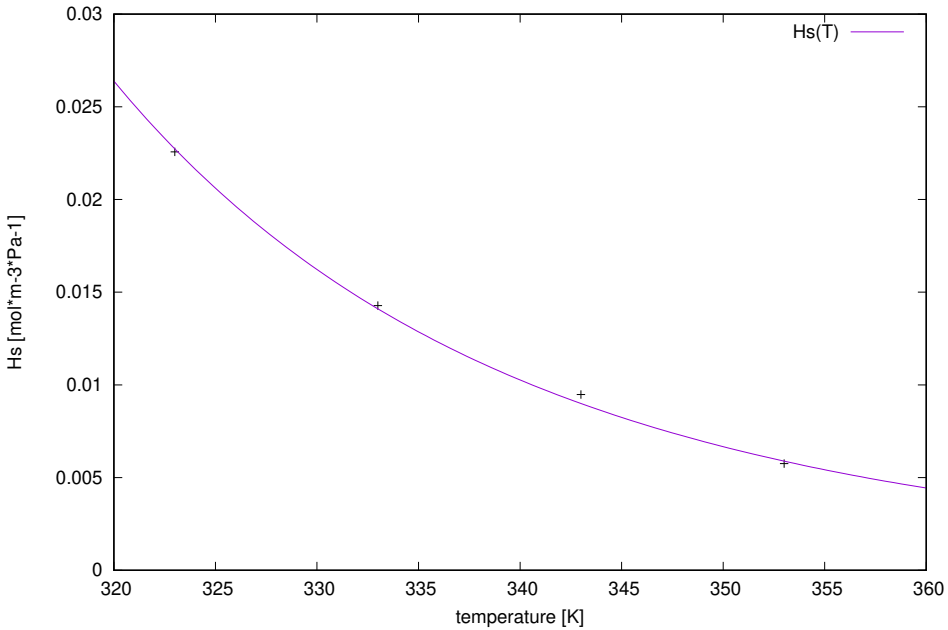

ref = 2825; chem = propanone; casrn = 67-64-1; r2 = 0.99982

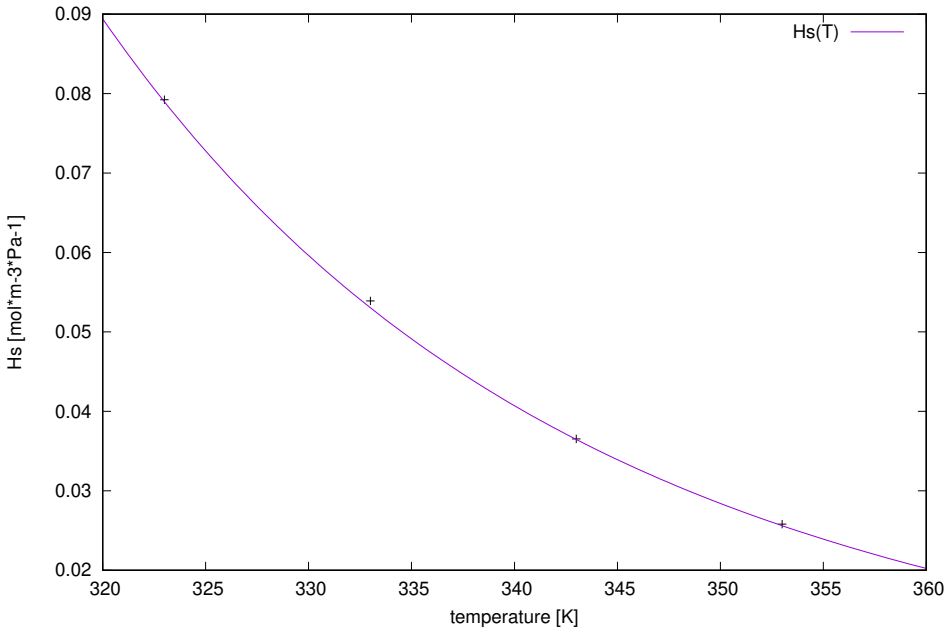

ref = 2825; chem = butanone; casrn = 78-93-3; r2 = 0.99915

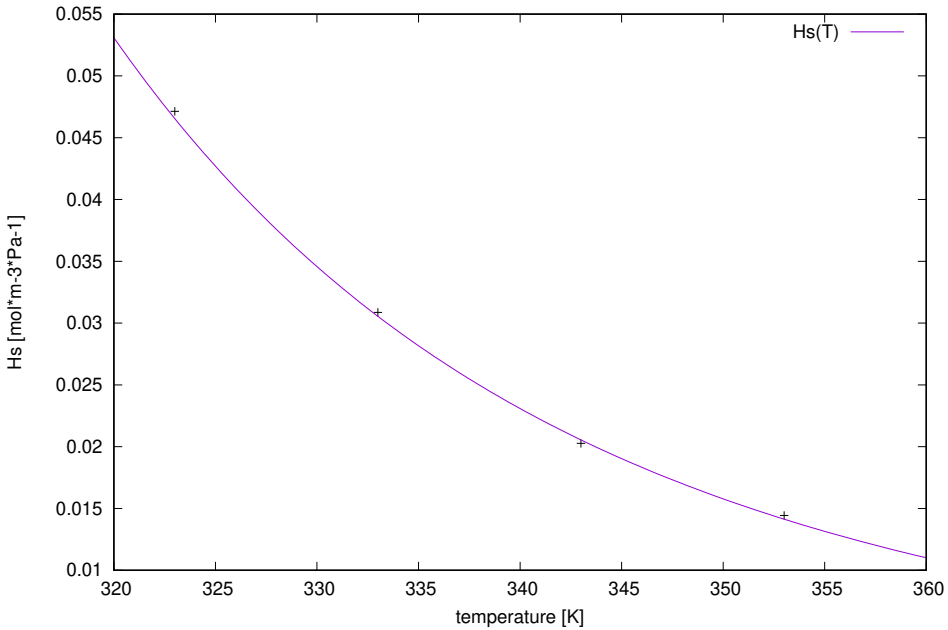

ref = 2830; chem = trichlorofluoromethane; casrn = 75-69-4; r2 = 0.99556

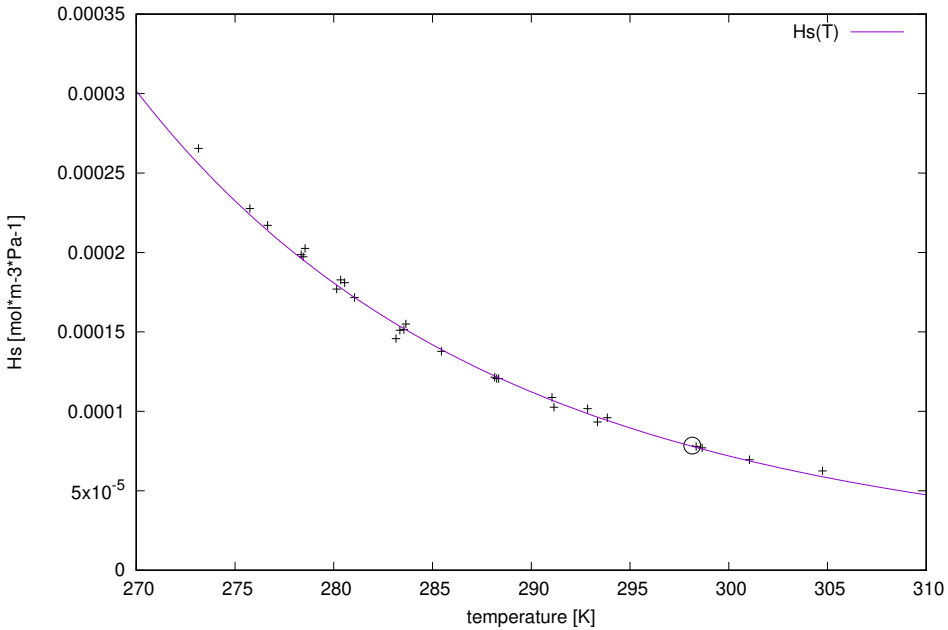

ref = 2830; chem = dichlorodifluoromethane; casrn = 75-71-8; r2 = 0.99330

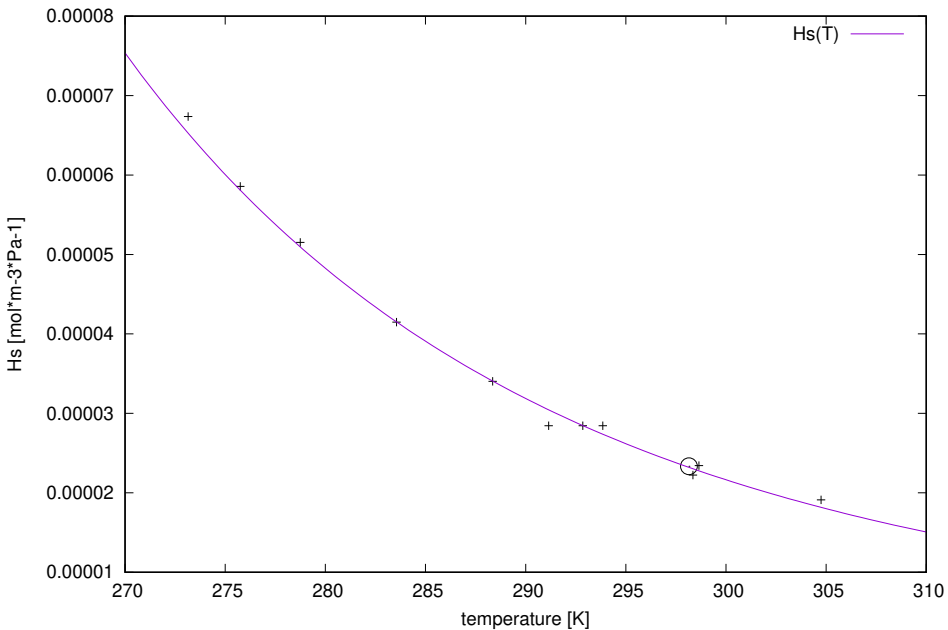

ref = 2831; chem = sulfur hexafluoride; casrn = 2551-62-4; r2 = 0.99990

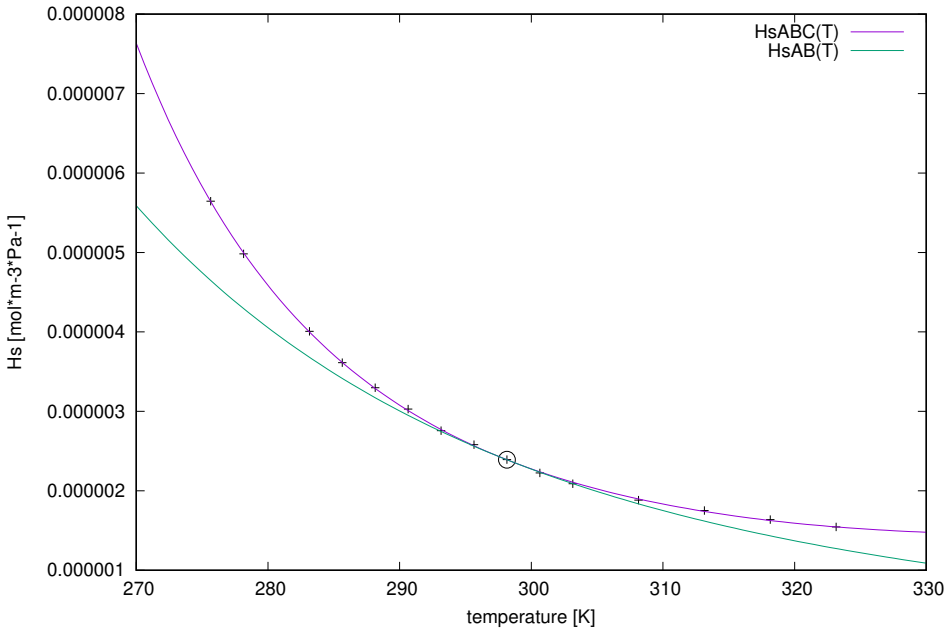

ref = 2831; chem = argon; casrn = 7440-37-1; r2 = 0.99999

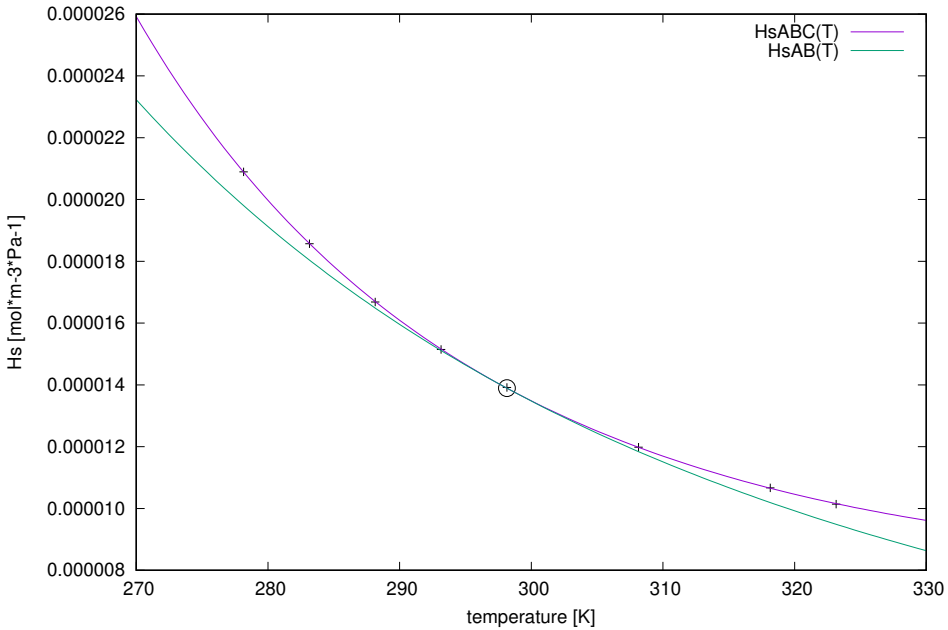

ref = 2831; chem = tetrafluoromethane; casrn = 75-73-0; r2 = 0.99970

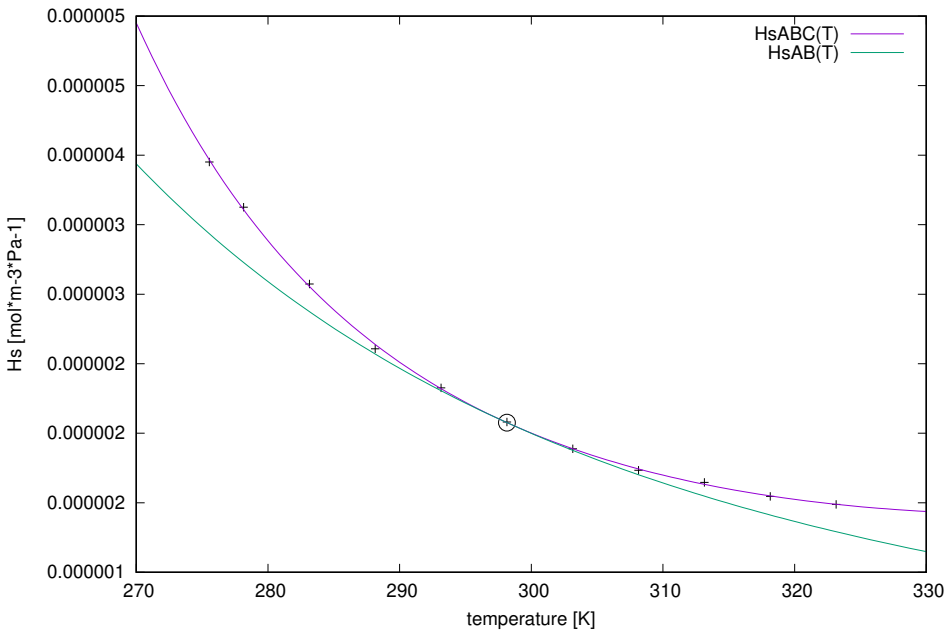



ref = 2831; chem = nitrogen trifluoride; casrn = 7783-54-2; r2 = 0.99969

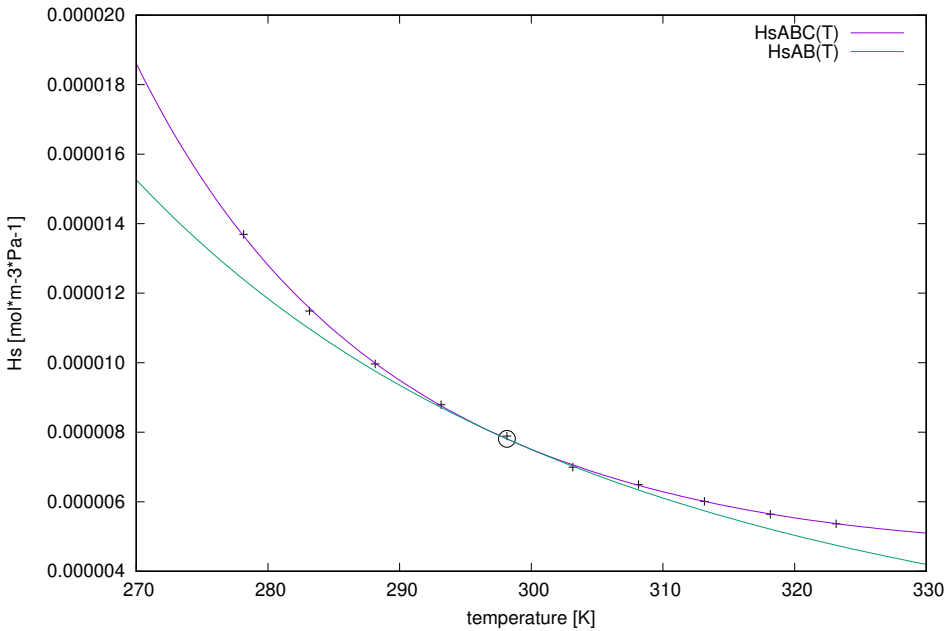

ref = 2832; chem = dinitrogen monoxide; casrn = 10024-97-2; r2 = 0.99999

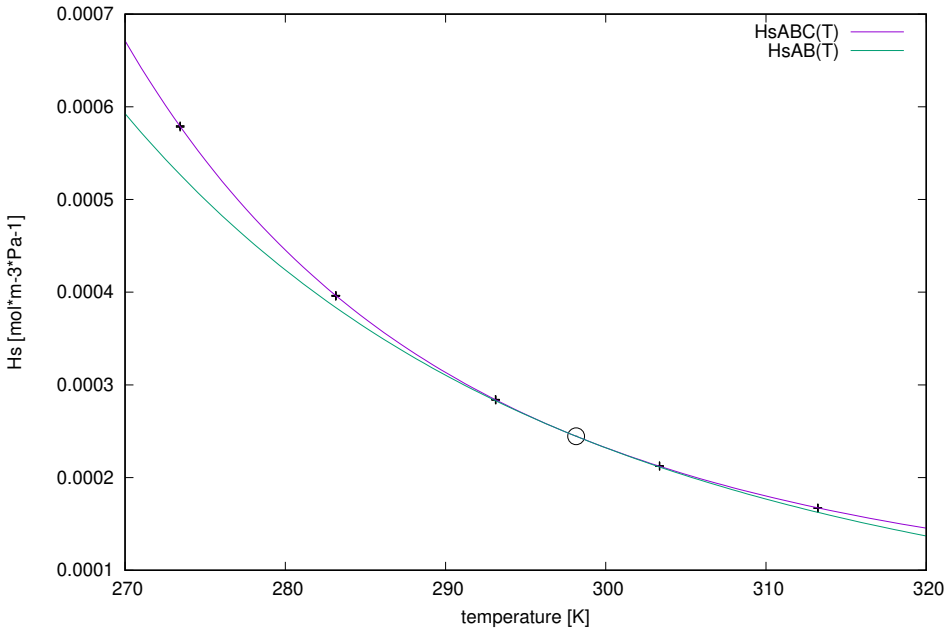

ref = 2834; chem = nitrogen monoxide; casrn = 10102-43-9; r2 = 0.99975

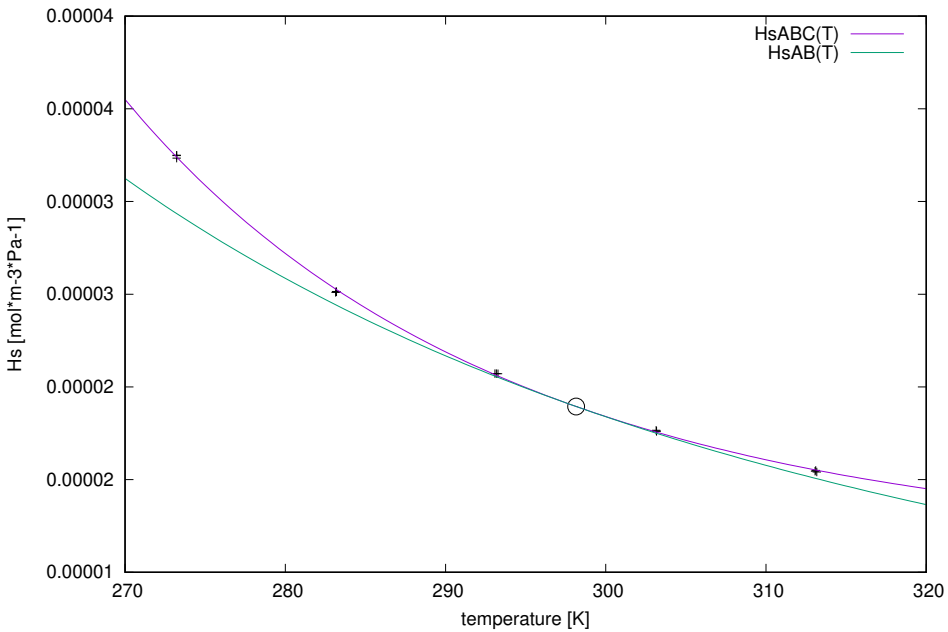

ref = 2834; chem = carbon monoxide; casrn = 630-08-0; r2 = 0.99978

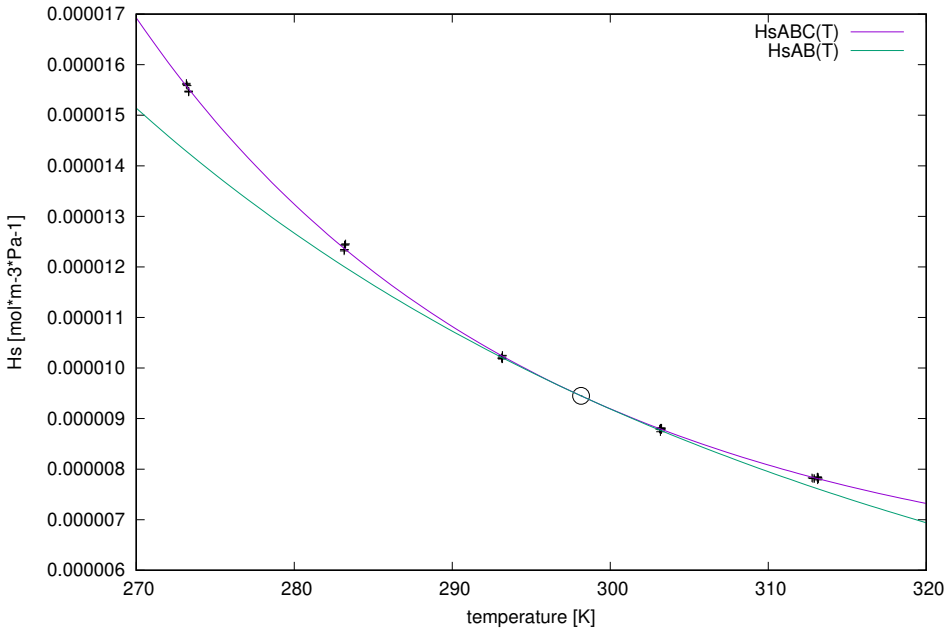

ref = 2834; chem = methane; casrn = 74-82-8; r2 = 0.99993

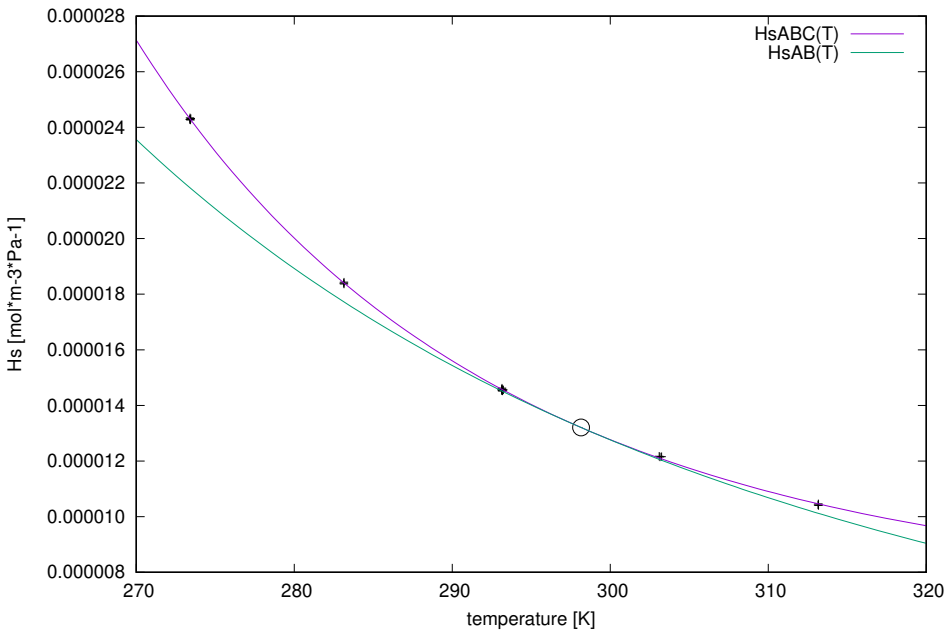

ref = 2834; chem = ethane; casrn = 74-84-0; r2 = 0.99994

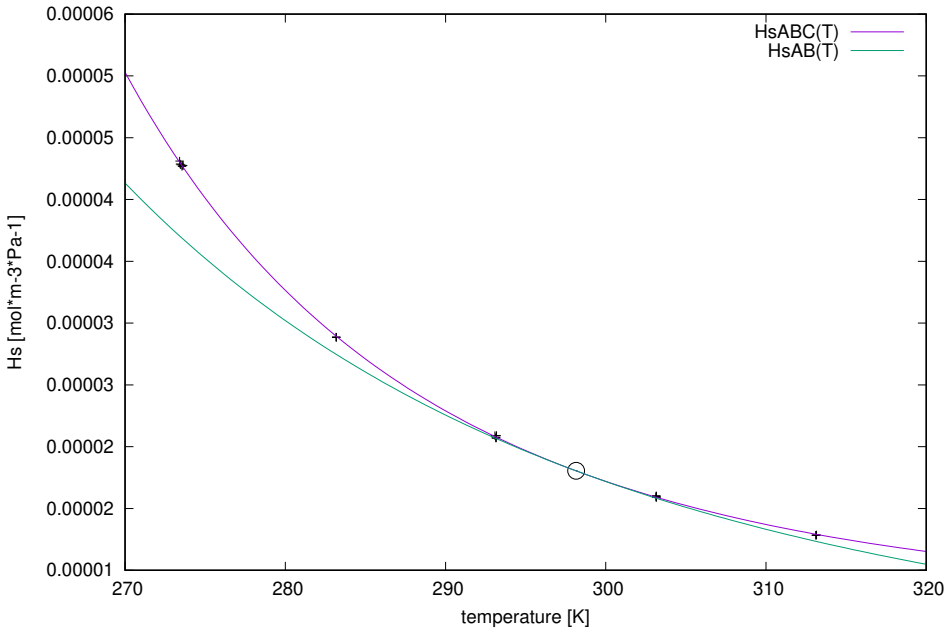

ref = 2837; chem = 3-oxa-1-heptanol; casrn = 111-76-2; r2 = 0.89830

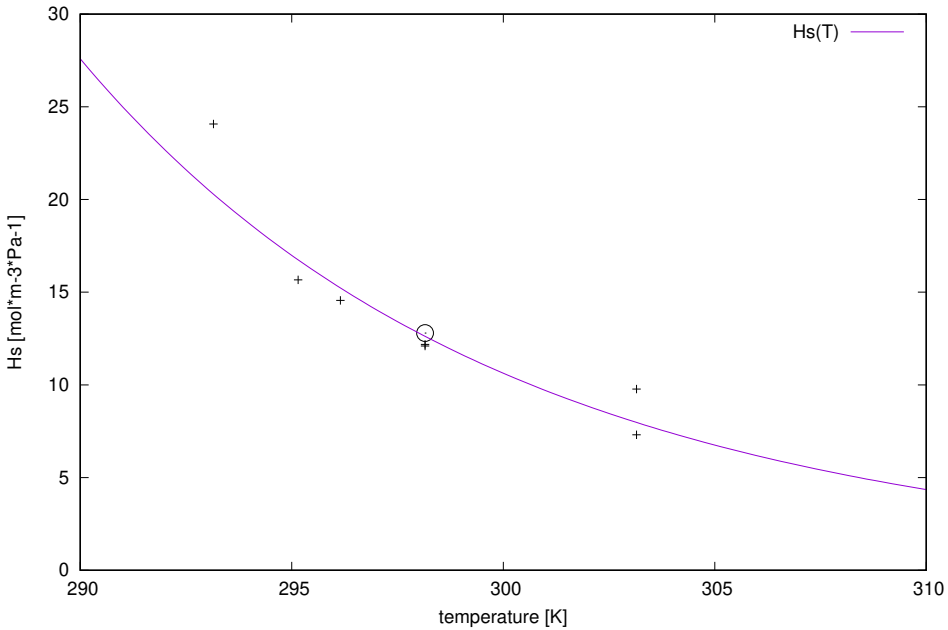

ref = 2837; chem = 2-butoxyethyl ethanoate; casrn = 112-07-2; r2 = 1.00000

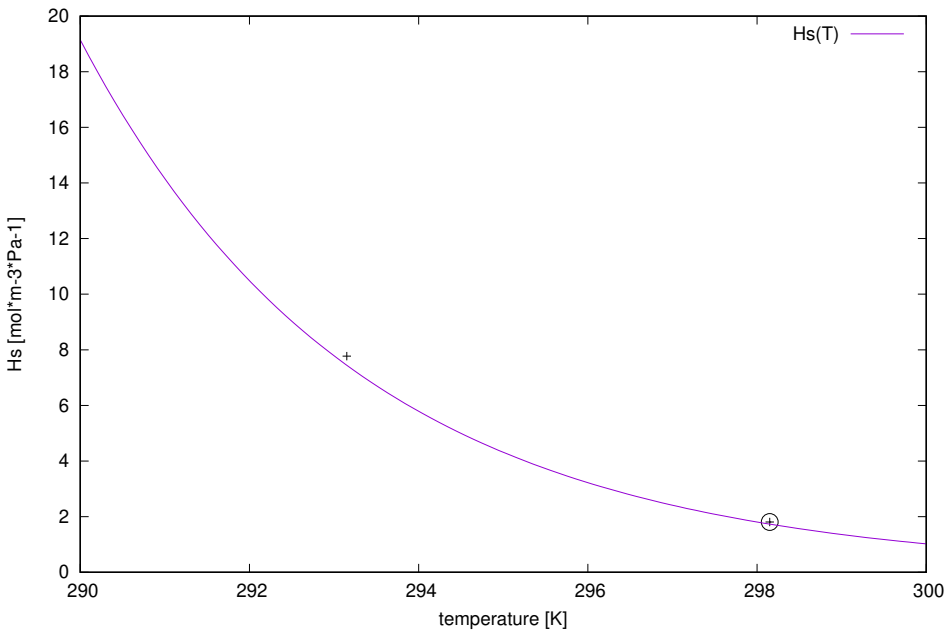



ref = 2841; chem = carbon dioxide; casrn = 124-38-9; r2 = 0.99983

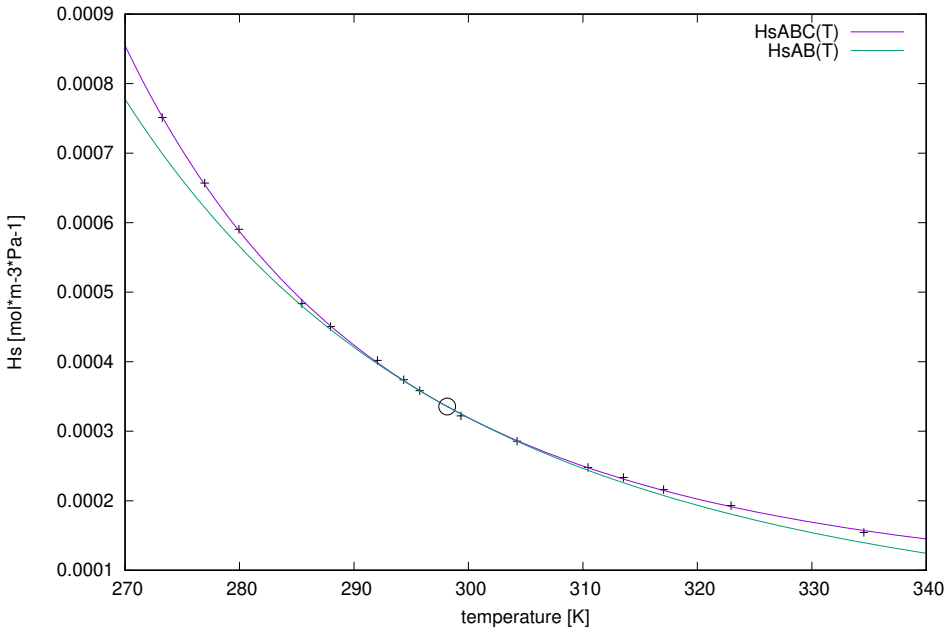

ref = 2895; chem = 1,2-dibromoethane; casrn = 106-93-4; r2 = 0.78036

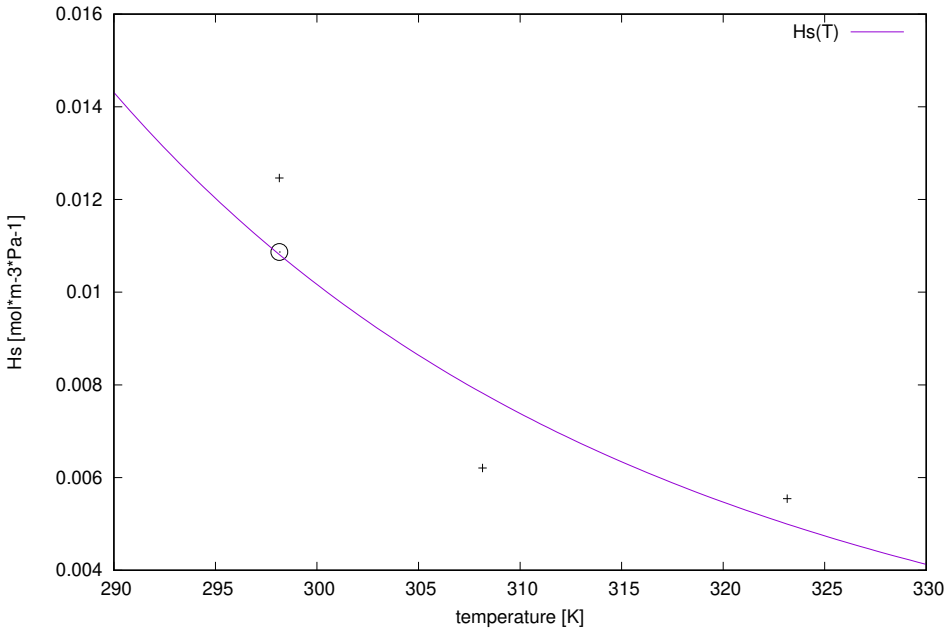

ref = 2895; chem = tribromomethane; casrn = 75-25-2; r2 = 0.99543

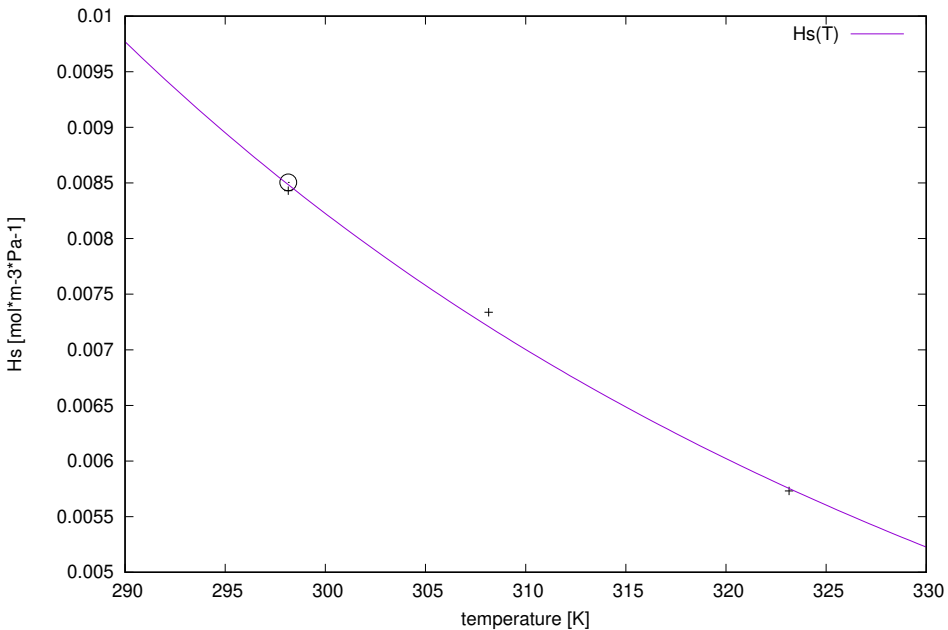

ref = 2895; chem = 1,1,2,2-tetrabromoethane; casrn = 79-27-6; r2 = 0.94649

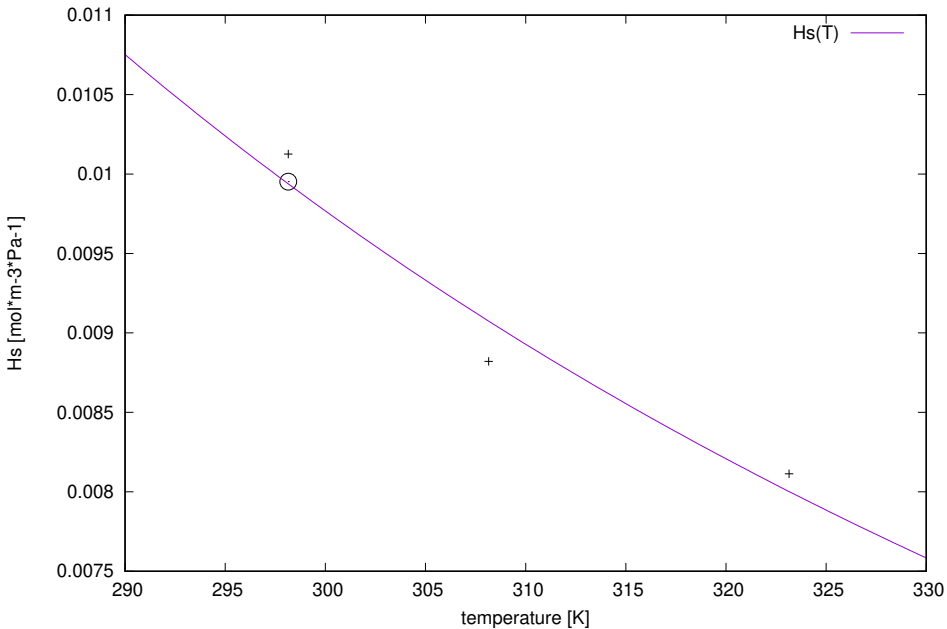

ref = 2896; chem = methylbenzene; casrn = 108-88-3; r2 = 0.98936

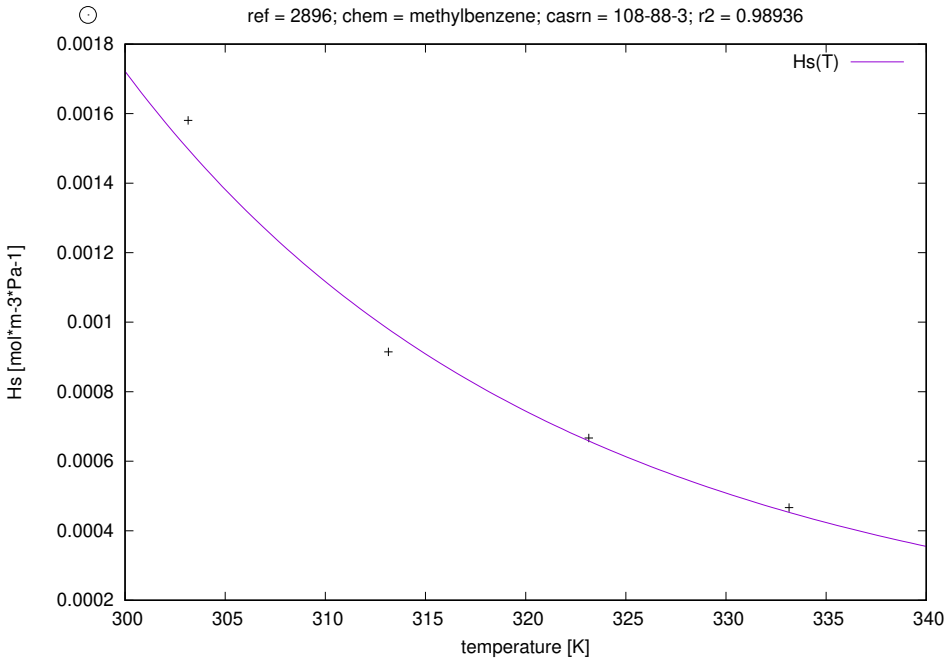

ref = 2896; chem = tetrachloroethene; casrn = 127-18-4; r2 = 0.99433

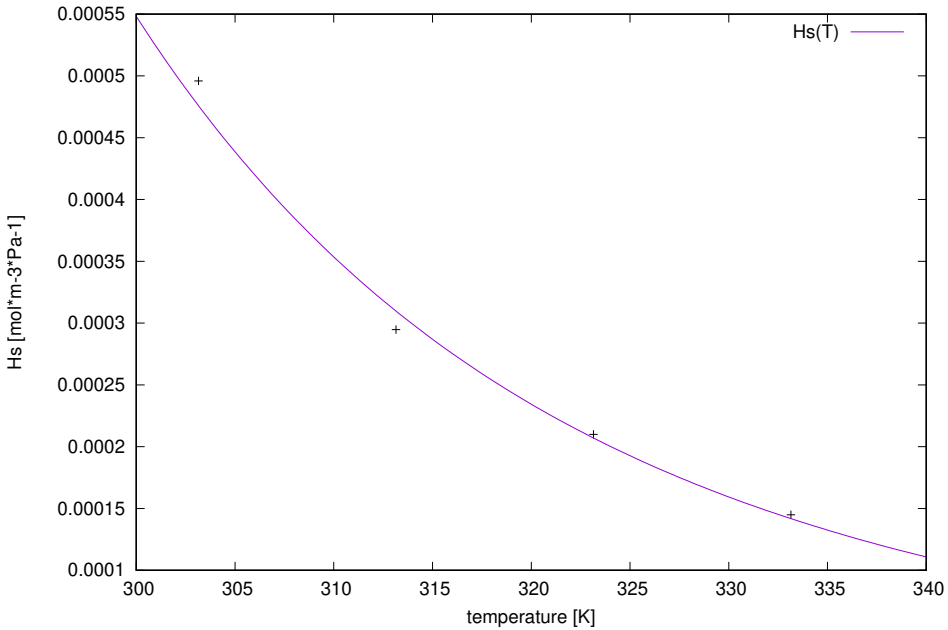

ref = 2896; chem = 1,1,1-trichloroethane; casrn = 71-55-6; r2 = 0.99191

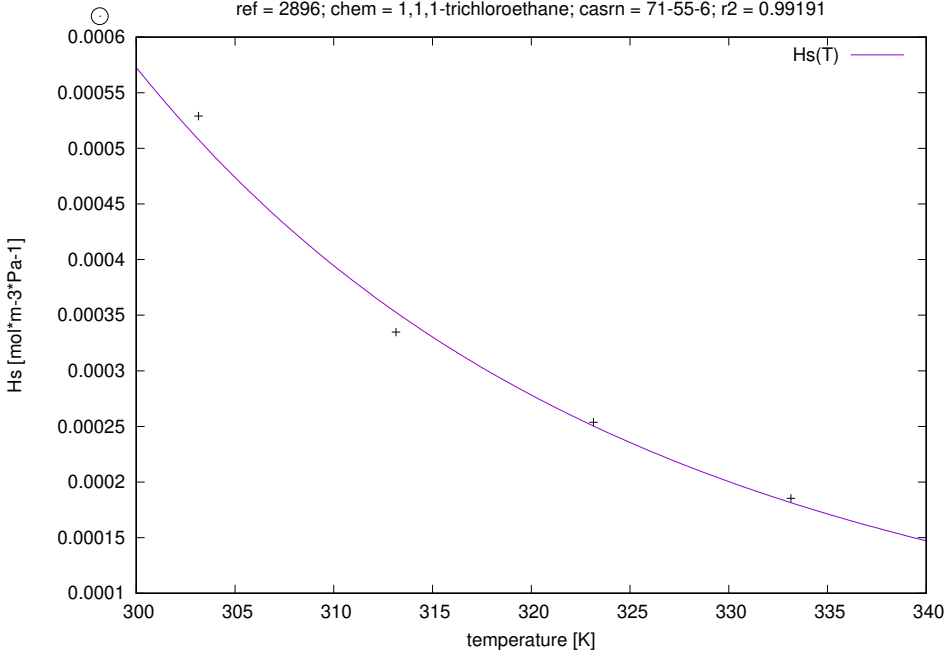

ref = 2896; chem = trichloroethene; casrn = 79-01-6; r2 = 0.99209

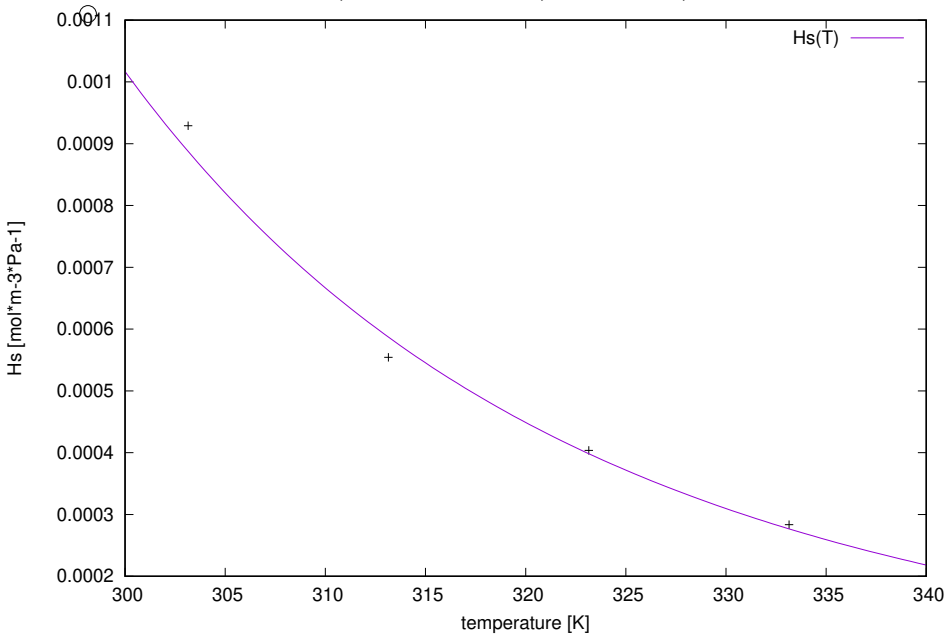



ref = 2897; chem = tetrachloroethene; casrn = 127-18-4; r2 = 0.99598

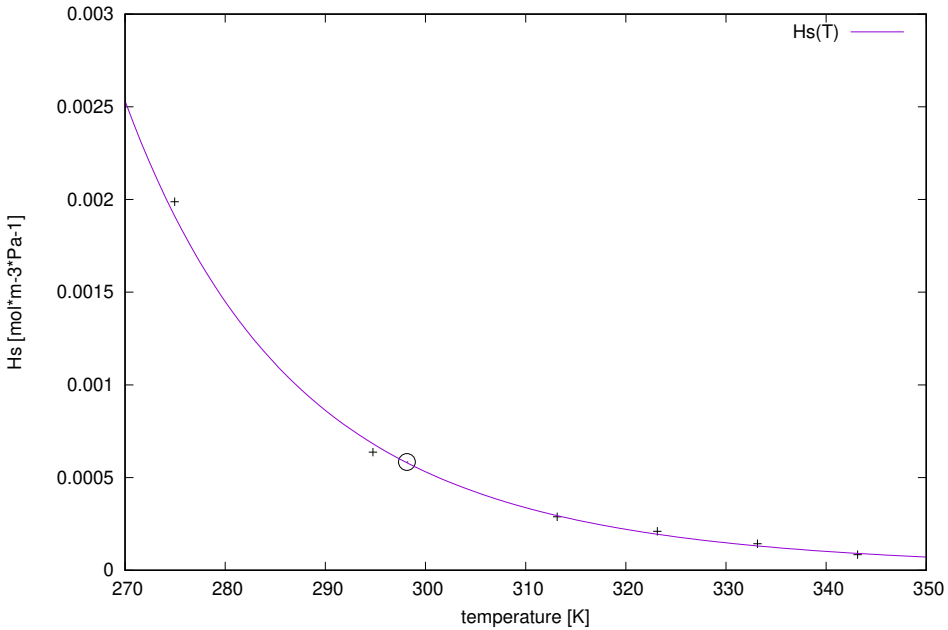

ref = 2897; chem = (\$Z\$)-1,2-dichloroethene; casrn = 156-59-2; r2 = 0.98902

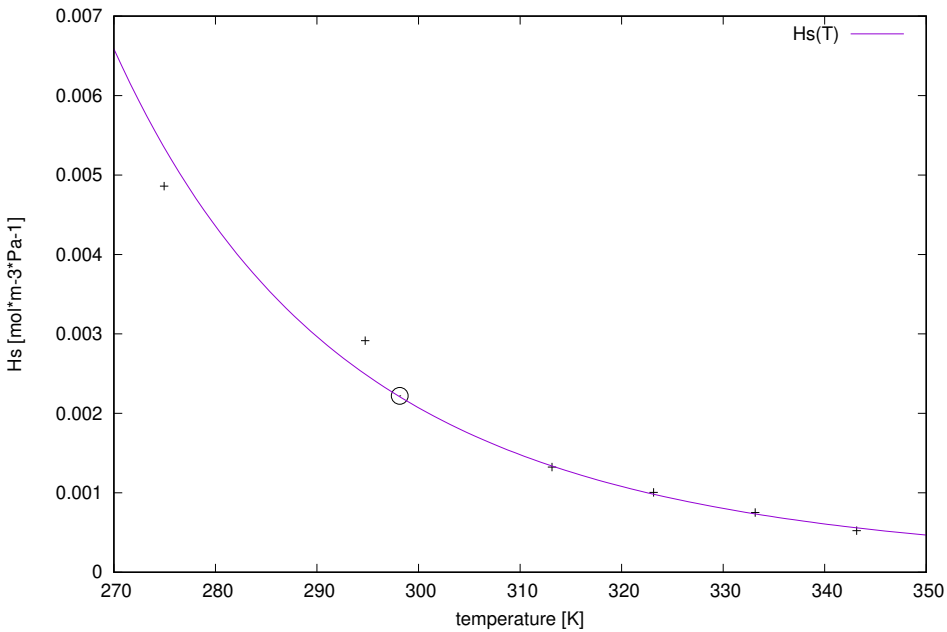

ref = 2897; chem = ( $\text{C}_2\text{H}_2\text{Cl}_2$ )-1,2-dichloroethene; casrn = 156-60-5; r2 = 0.99805

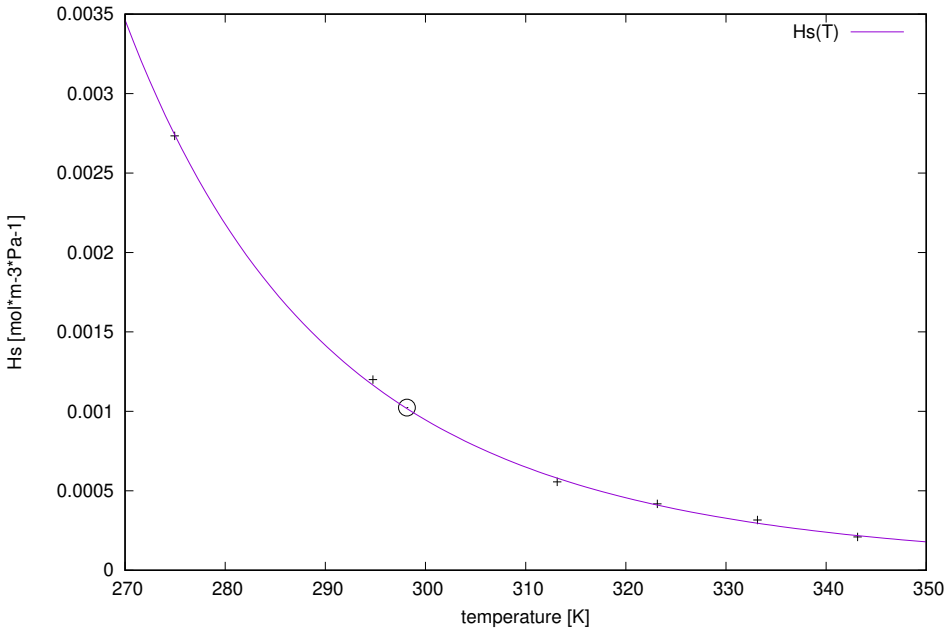

ref = 2897; chem = trichloroethene; casrn = 79-01-6; r2 = 0.99826

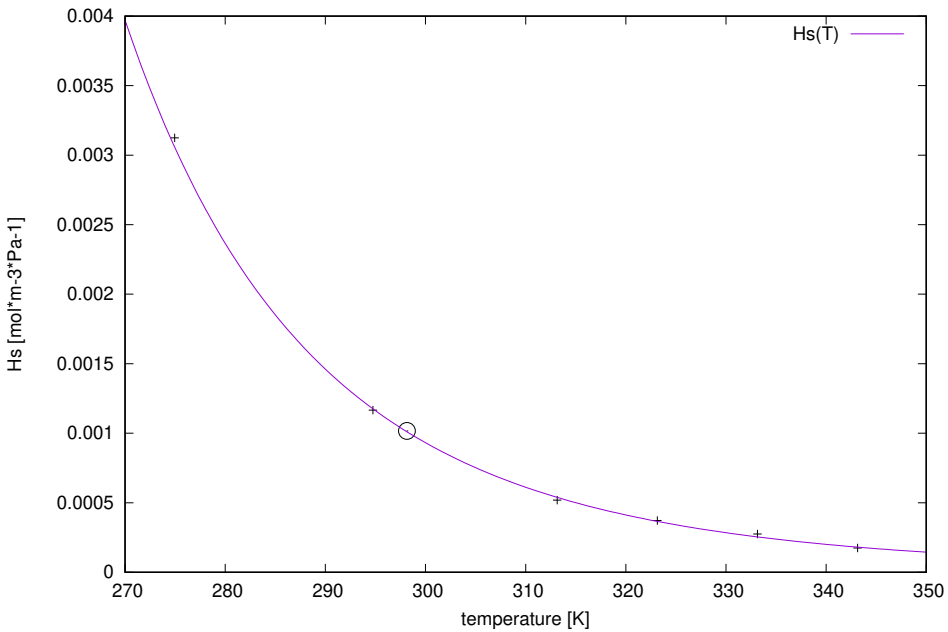

ref = 2901; chem = 1,2-dichloroethane; casrn = 107-06-2; r2 = 1.00000

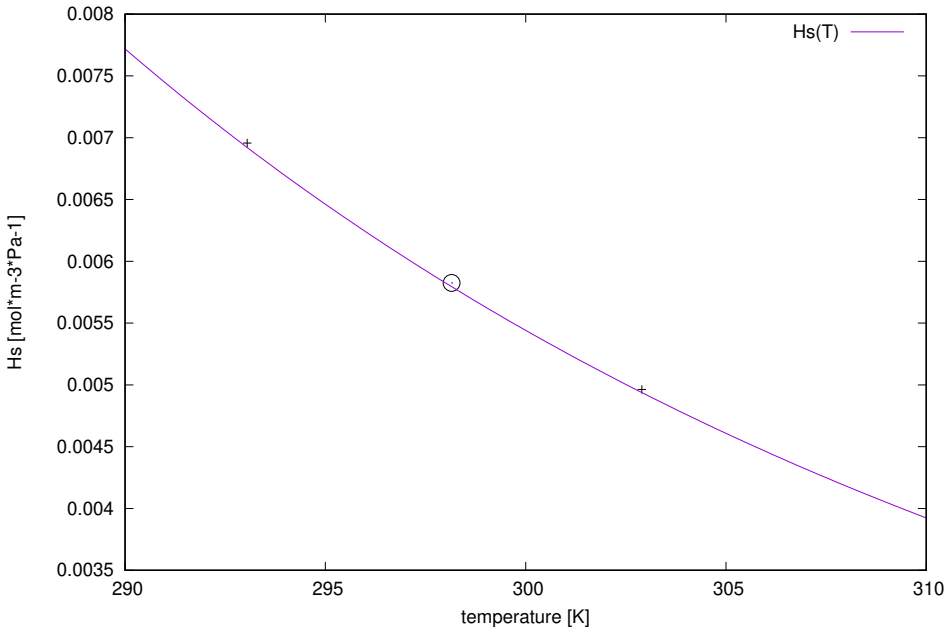

ref = 2901; chem = methylbenzene; casrn = 108-88-3; r2 = 1.00000

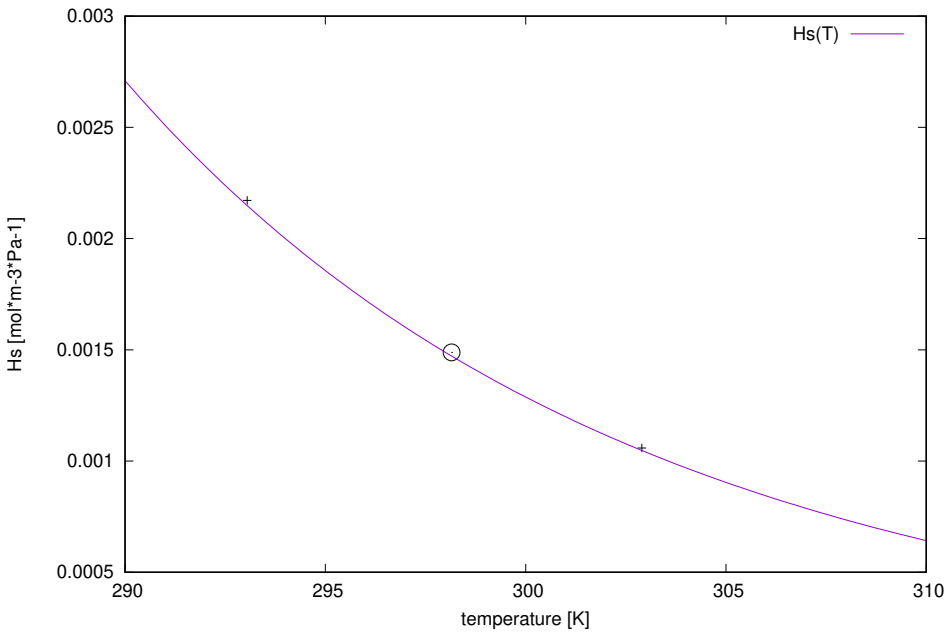

ref = 2901; chem = diethyl ether; casrn = 60-29-7; r2 = 1.00000

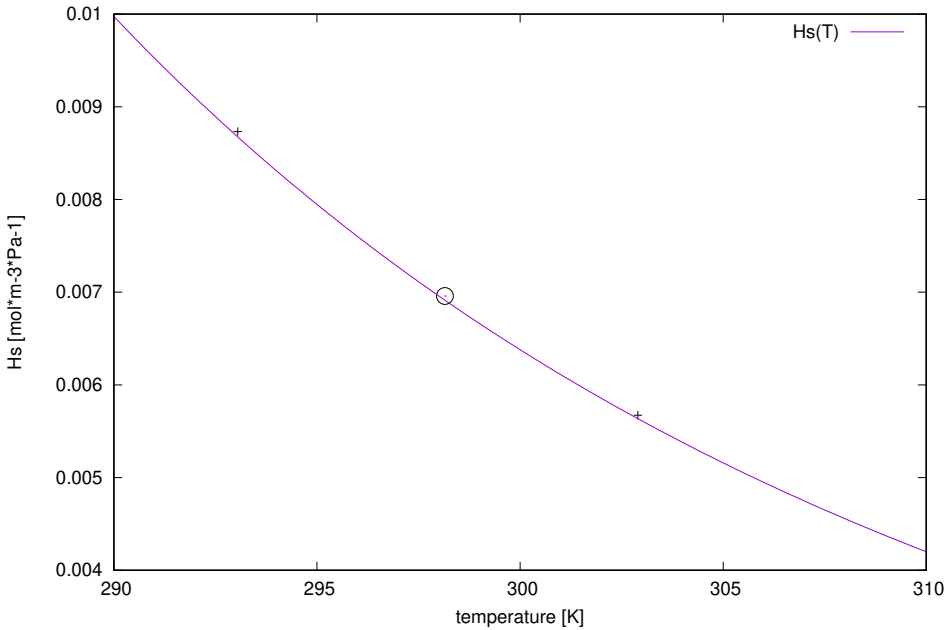

ref = 2901; chem = trichloromethane; casrn = 67-66-3; r2 = 1.00000

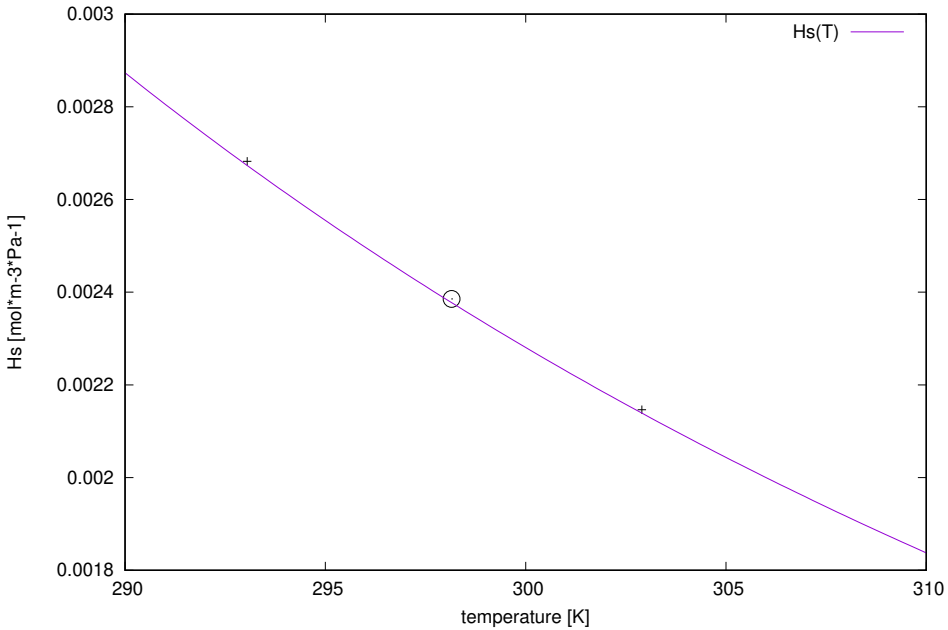



ref = 2901; chem = 1,1-dichloroethane; casrn = 75-34-3; r2 = 1.00000

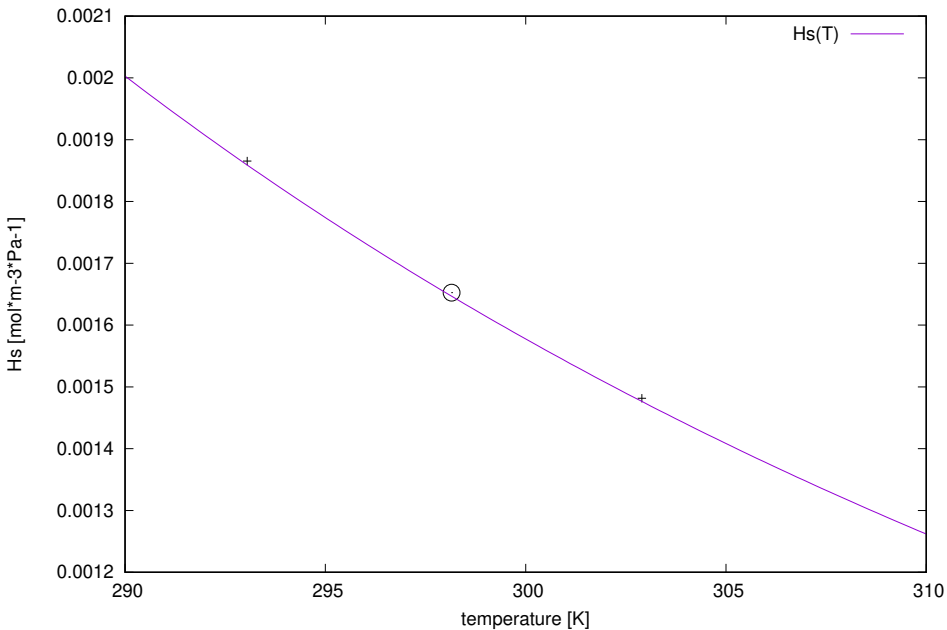

ref = 2901; chem = trichloroethene; casrn = 79-01-6; r2 = 1.00000

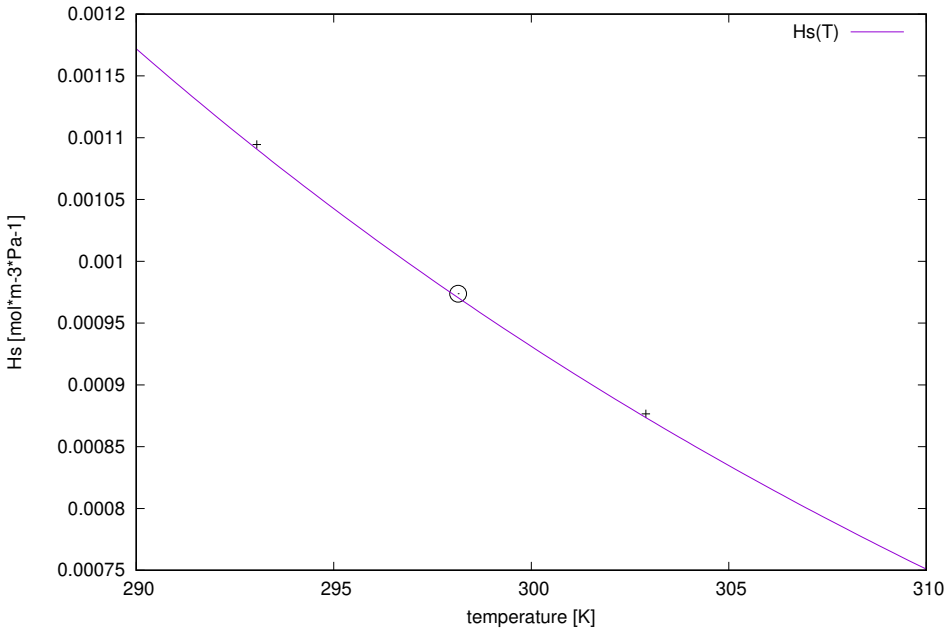

ref = 2904; chem = 1,2,3-trichlorobenzene; casrn = 79-34-5; r2 = 0.94578

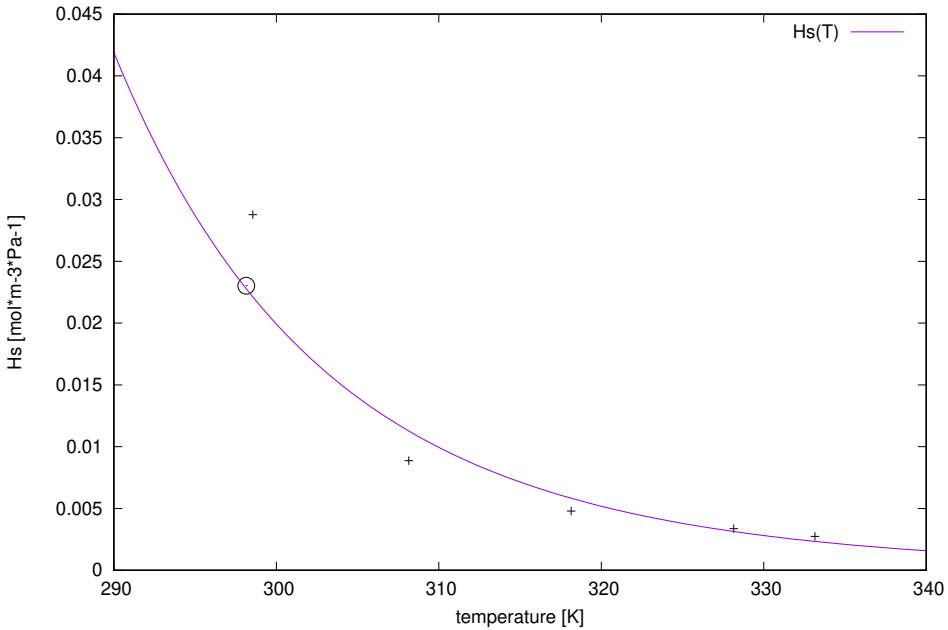

ref = 2904; chem = 1,2,3-trichlorobenzene; casrn = 96-18-4; r2 = 0.99627

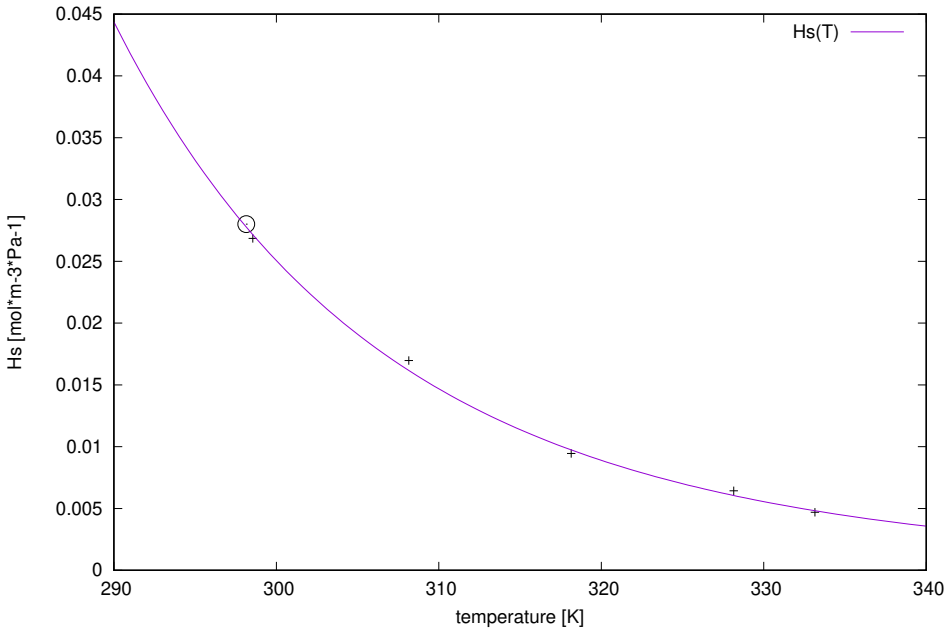

ref = 2904; chem = 1,2,3-trichlorobenzene; casrn = 98-82-8; r2 = 0.98642

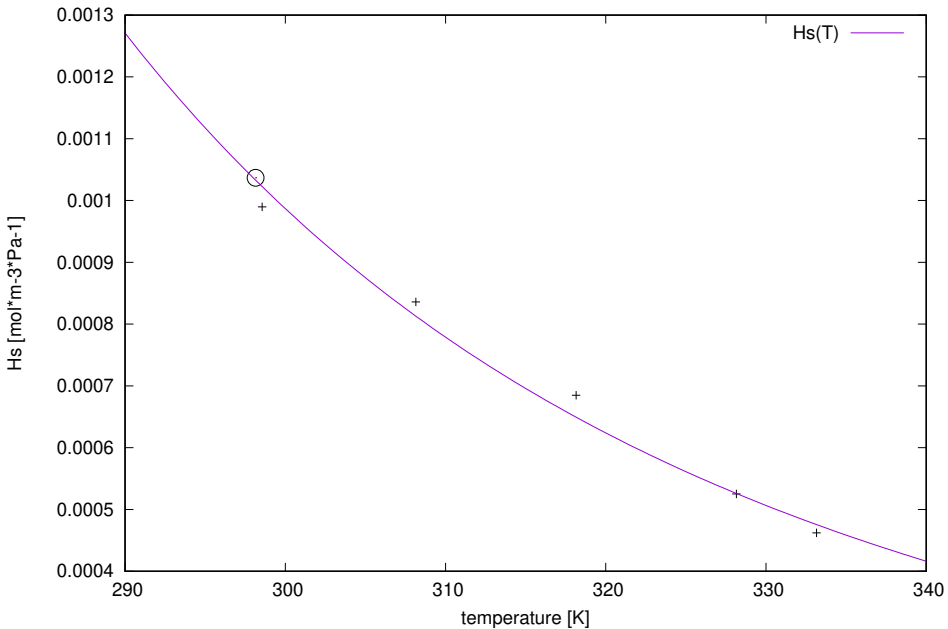

ref = 2905; chem = 1,4-dimethylbenzene; casrn = 106-42-3; r2 = 0.97656

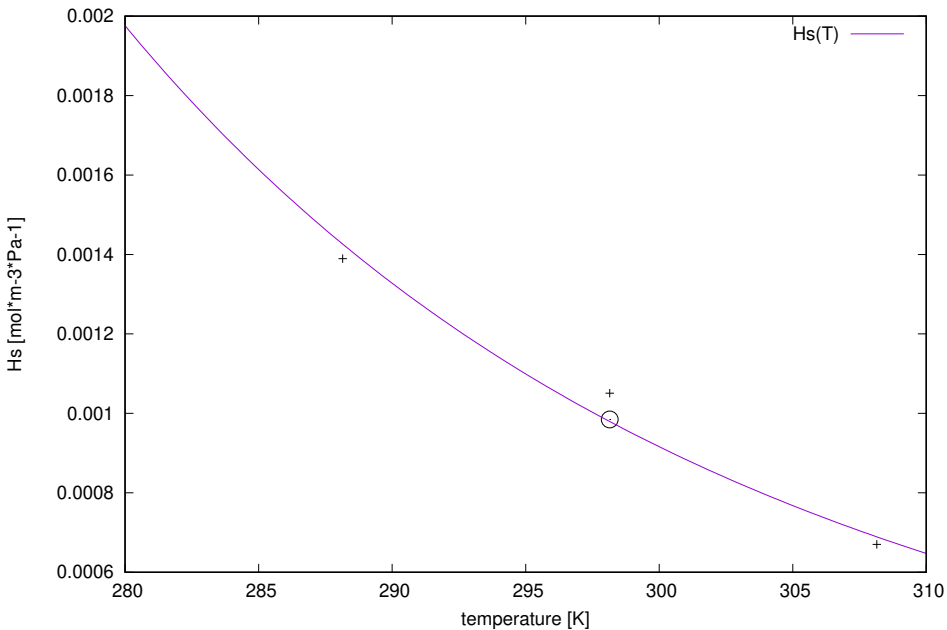

ref = 2905; chem = methylbenzene; casrn = 108-88-3; r2 = 0.99124

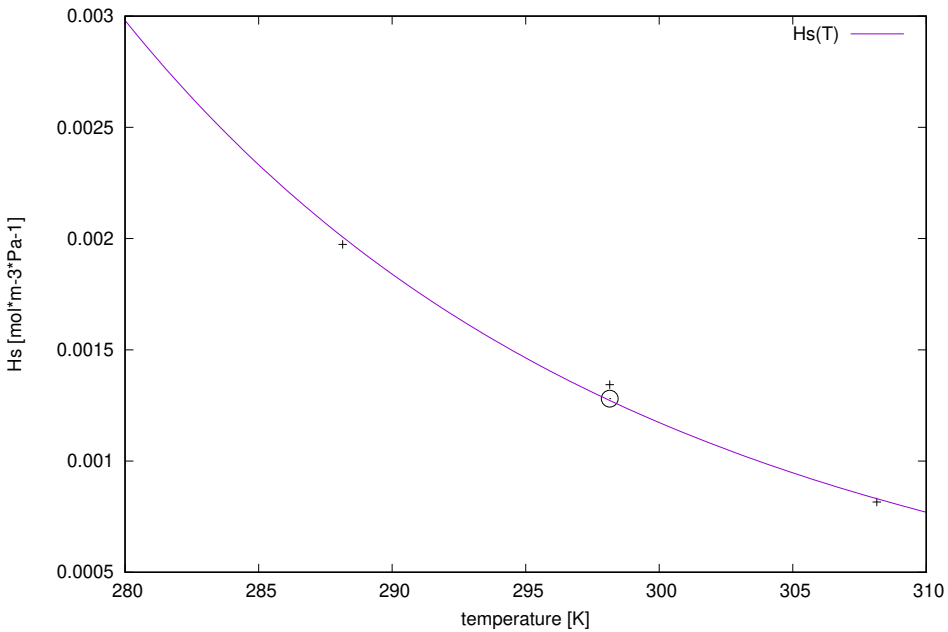

ref = 2905; chem = chlorobenzene; casrn = 108-90-7; r2 = 0.92857

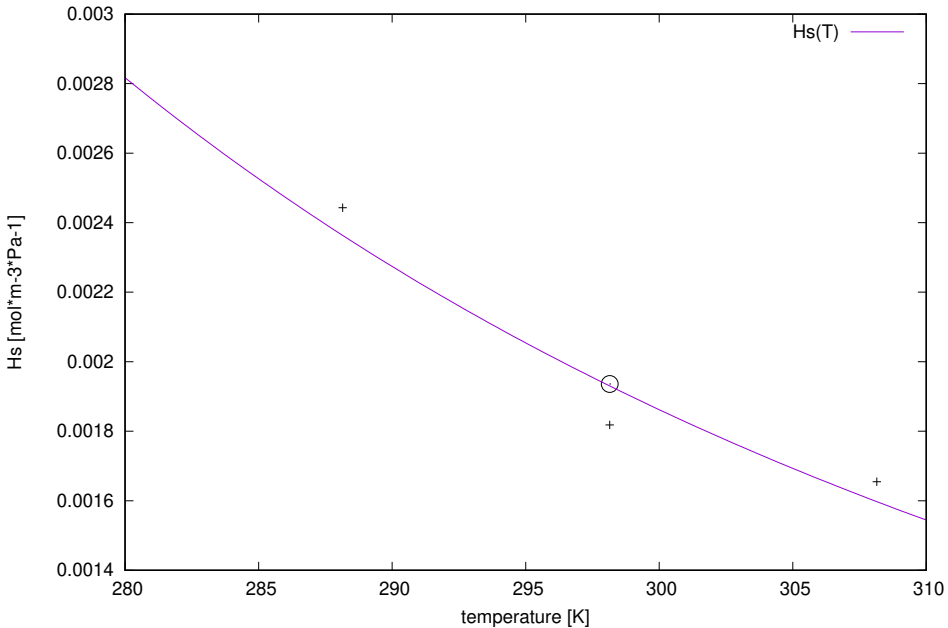



ref = 2905; chem = tetrachloroethene; casrn = 127-18-4; r2 = 0.94071

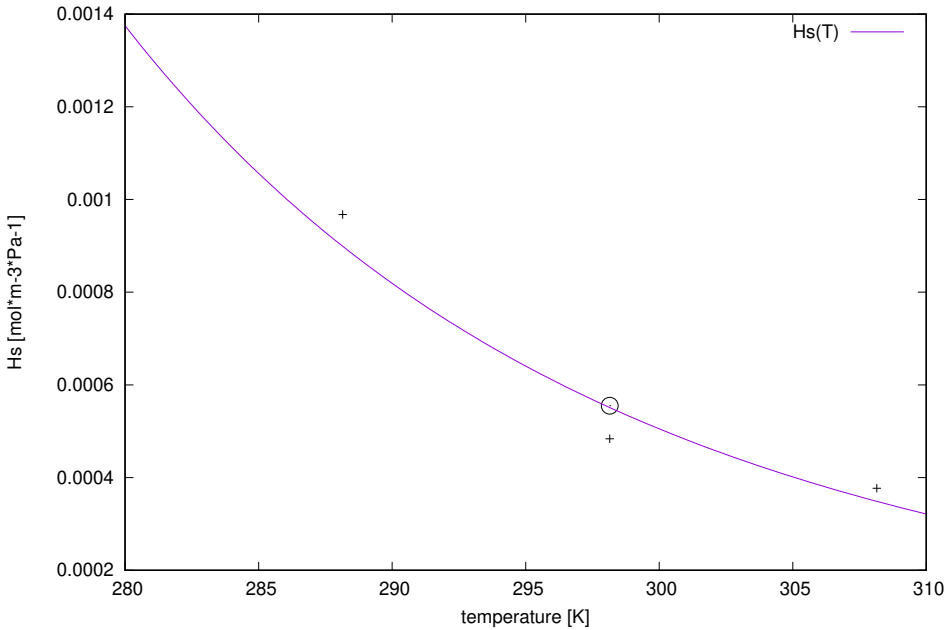

ref = 2905; chem = (\$Z\$)-1,2-dichloroethene; casrn = 156-59-2; r2 = 0.99413

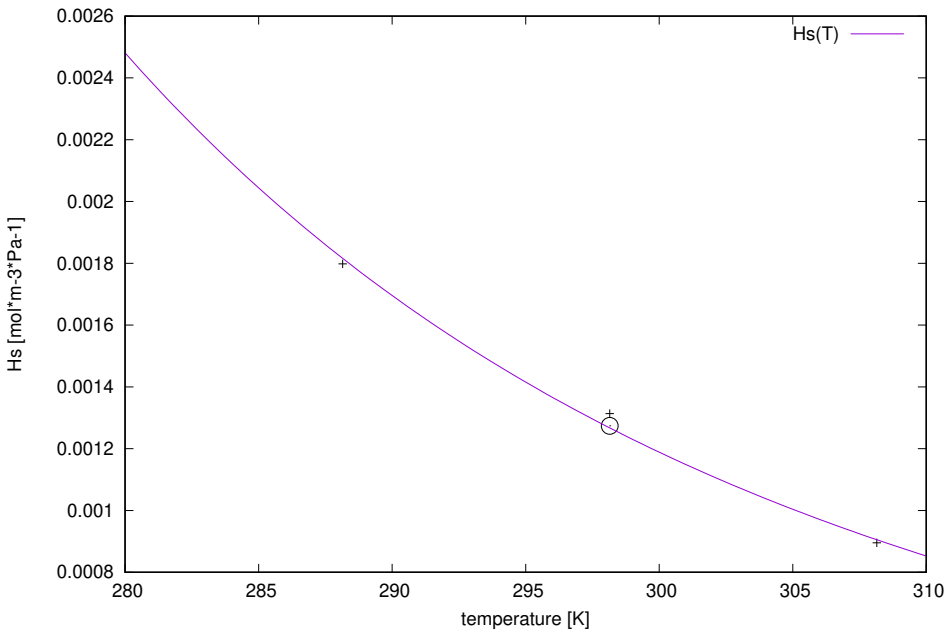

ref = 2905; chem = ( $\text{E}$ )-1,2-dichloroethene; casrn = 156-60-5; r2 = 0.95184

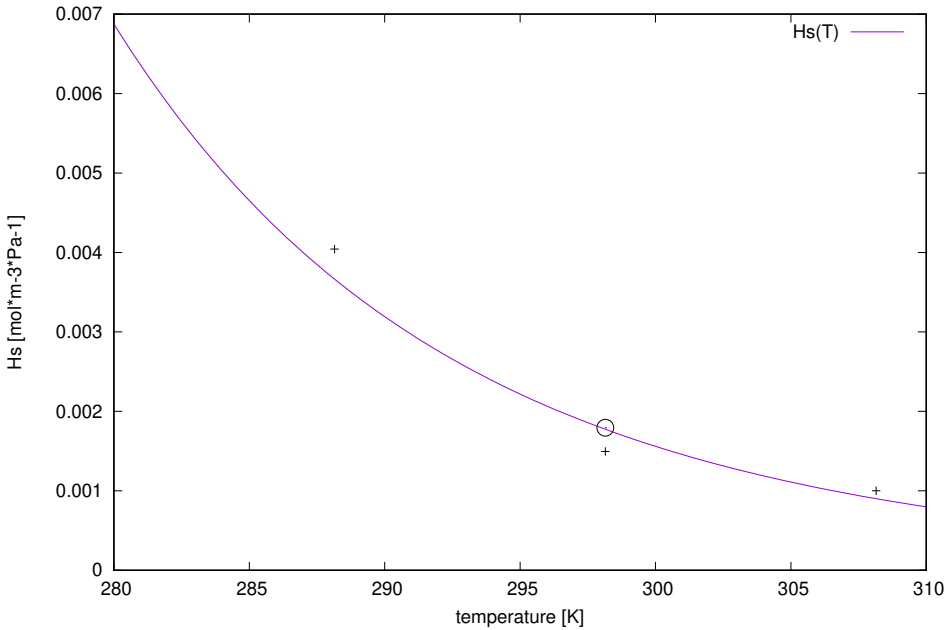

ref = 2905; chem = tetrachloromethane; casrn = 56-23-5; r2 = 0.98886

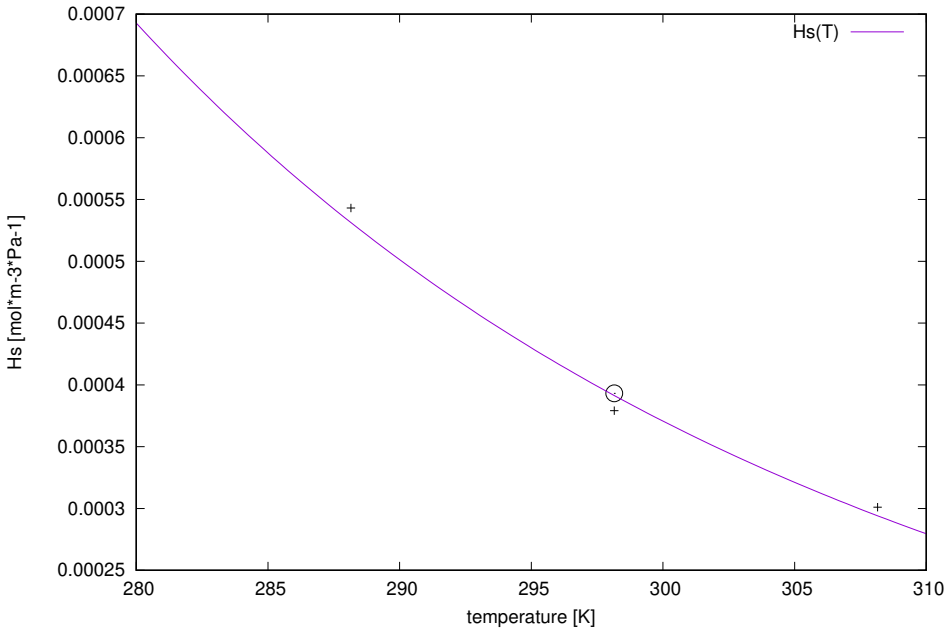

ref = 2905; chem = trichloromethane; casrn = 67-66-3; r2 = 0.99711

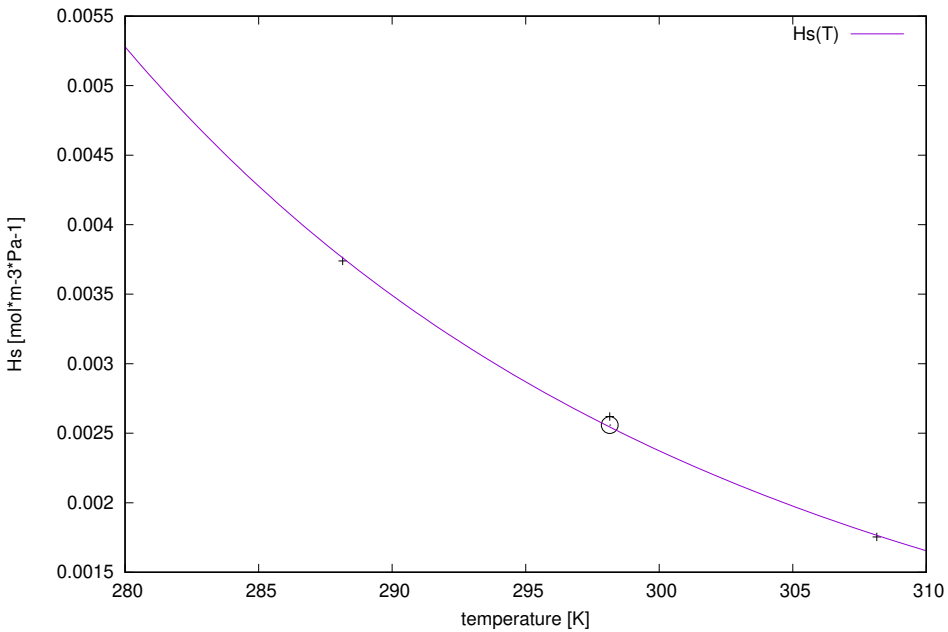

ref = 2905; chem = benzene; casrn = 71-43-2; r2 = 0.96548

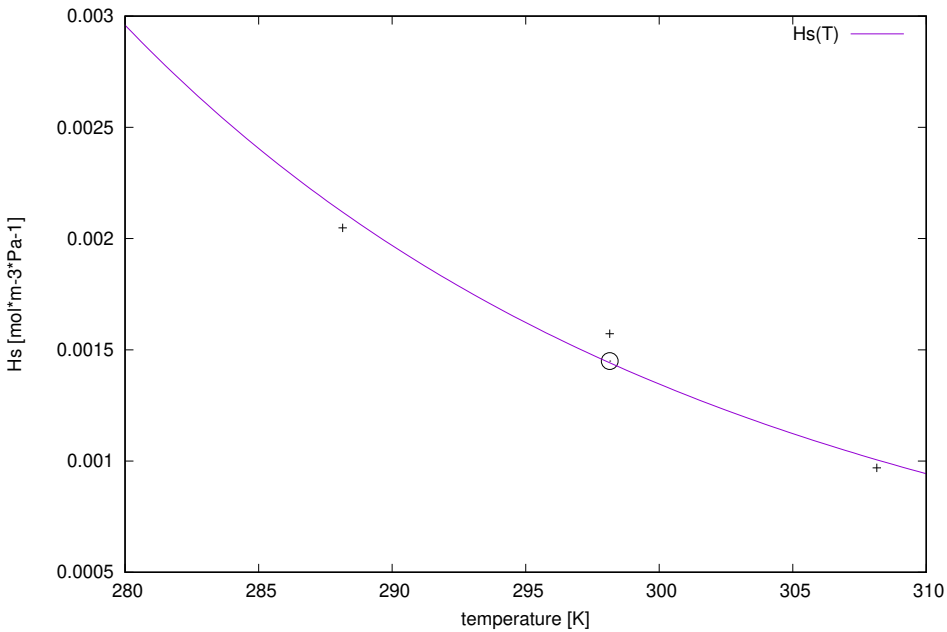

ref = 2905; chem = dichloromethane; casrn = 75-09-2; r2 = 0.99156

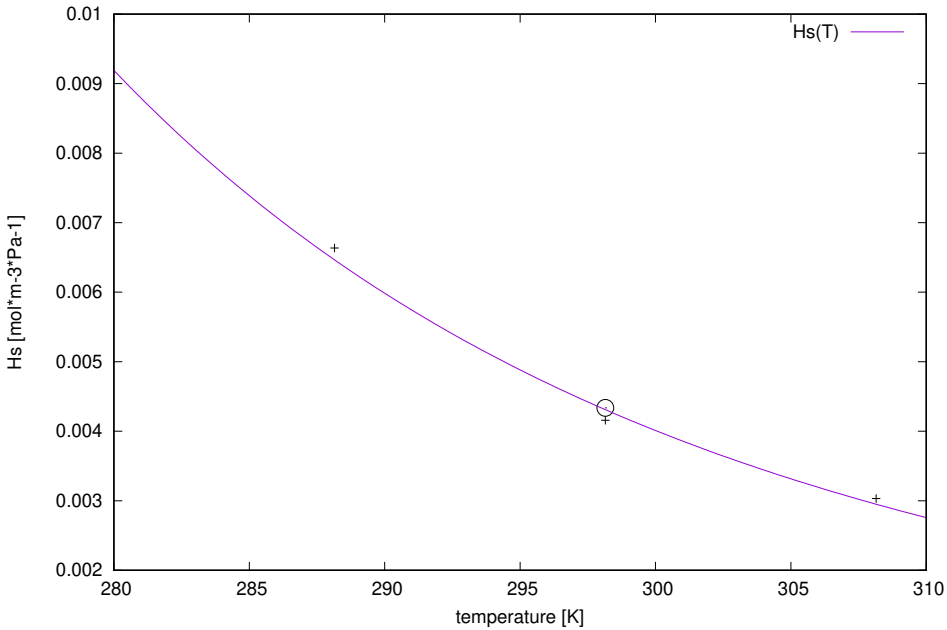

ref = 2905; chem = trichloroethene; casrn = 79-01-6; r2 = 0.99953

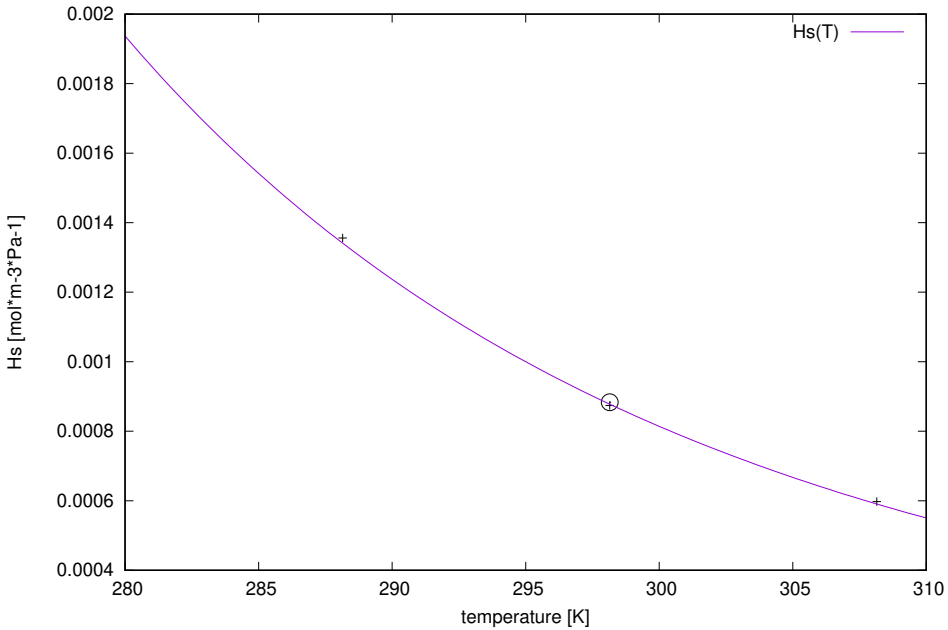



ref = 2905; chem = 1,2-dichlorobenzene; casrn = 95-50-1; r2 = 0.99430

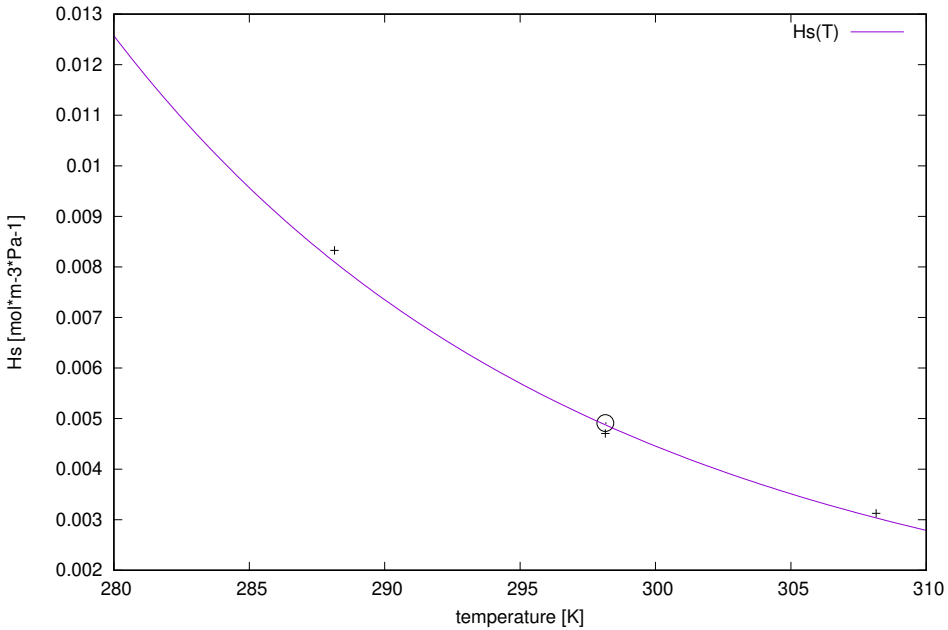

ref = 2909; chem = pentane; casrn = 109-66-0; r2 = 0.98778

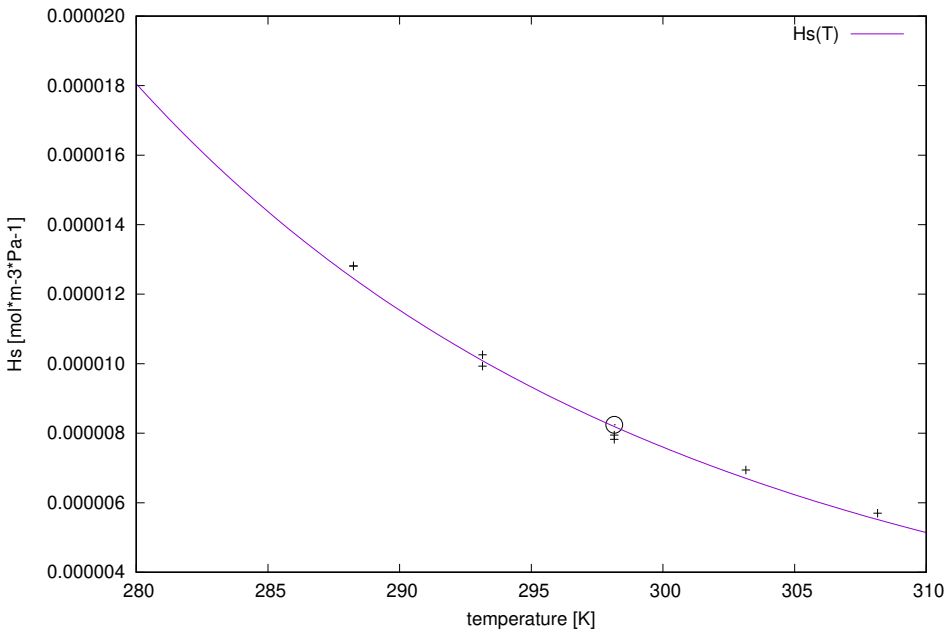

ref = 2909; chem = hexane; casrn = 110-54-3; r2 = 0.99837

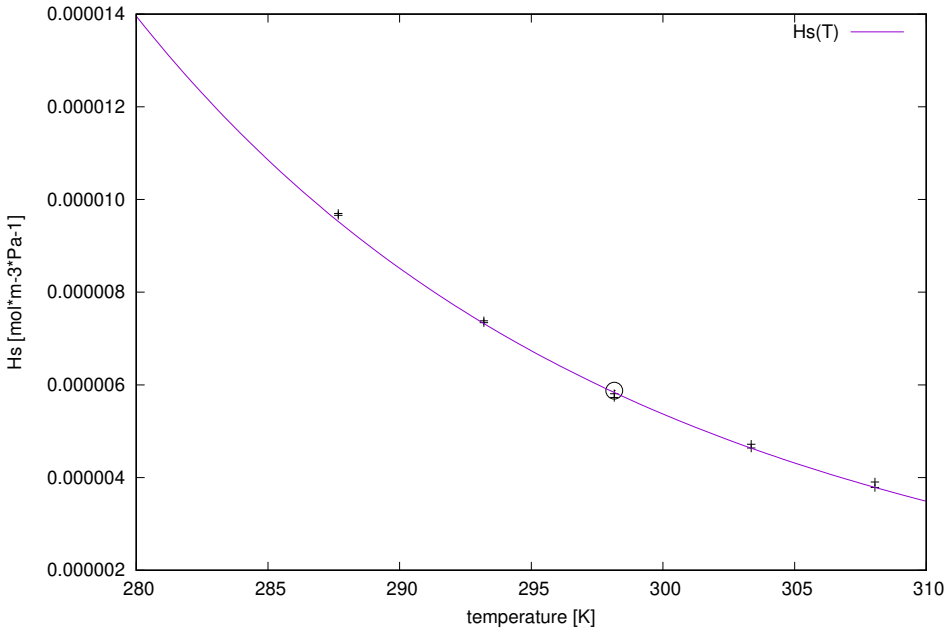

ref = 2909; chem = octane; casrn = 111-65-9; r2 = 0.99334

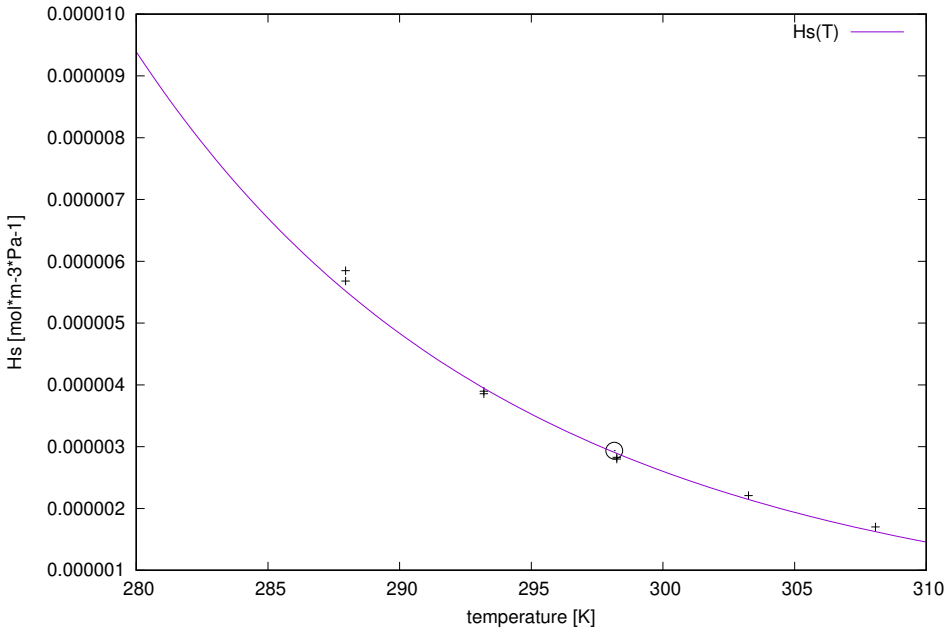

ref = 2909; chem = nonane; casrn = 111-84-2; r2 = 0.97713

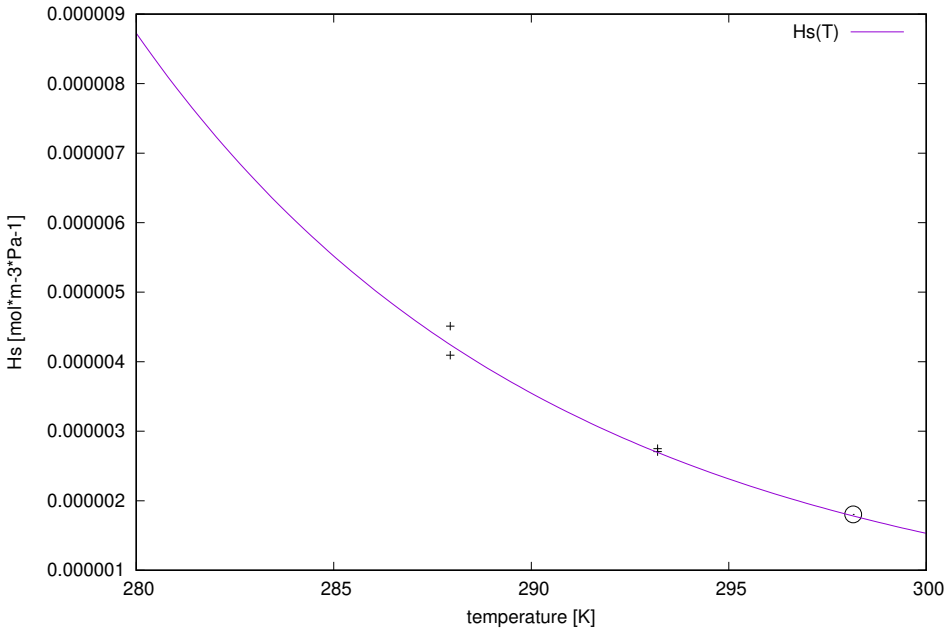

ref = 2909; chem = heptane; casrn = 142-82-5; r2 = 0.99413

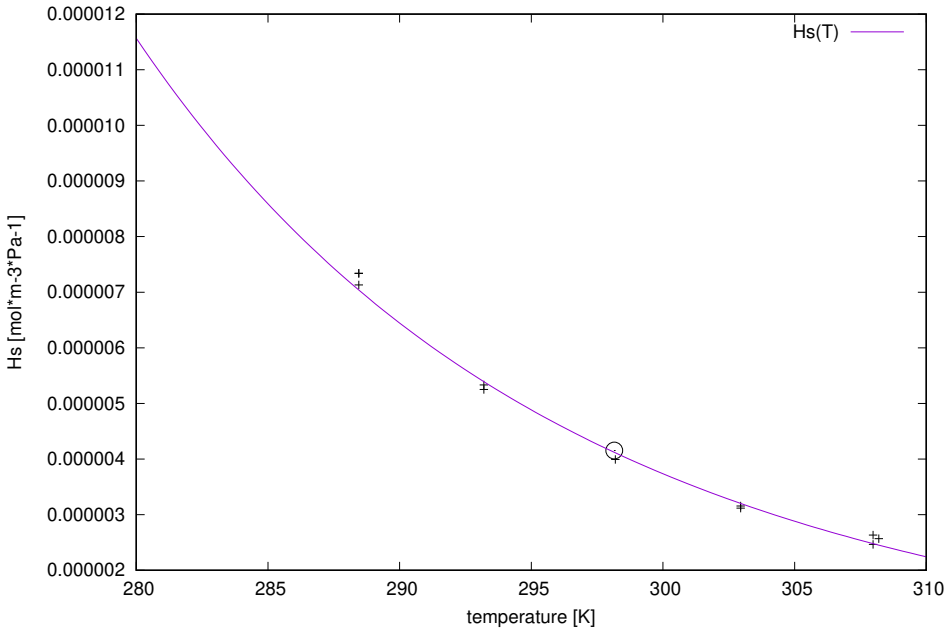

ref = 2910; chem = pentane; casrn = 109-66-0; r2 = 0.99509

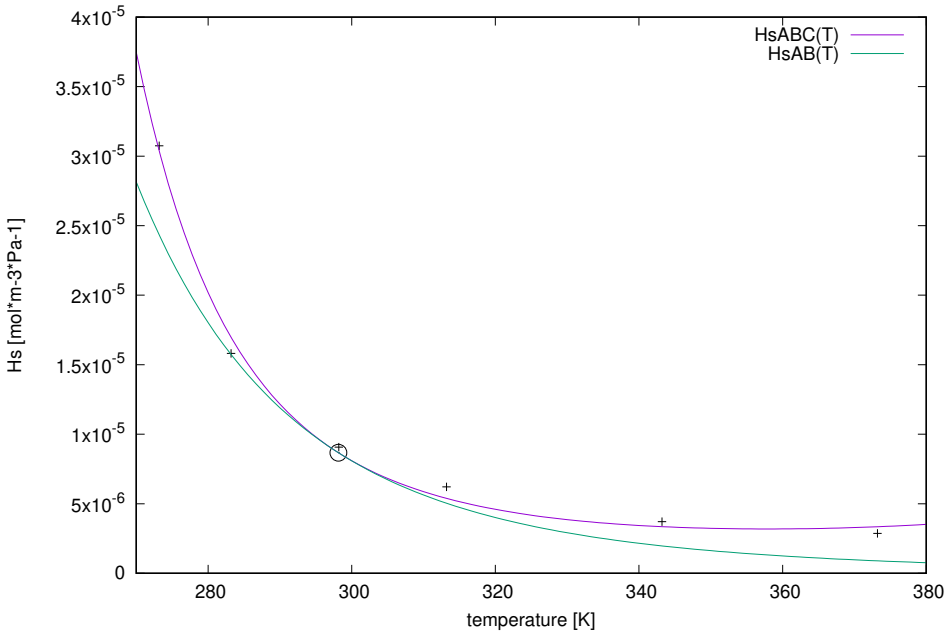

ref = 2914; chem = anthracene; casrn = 120-12-7; r2 = 1.00000

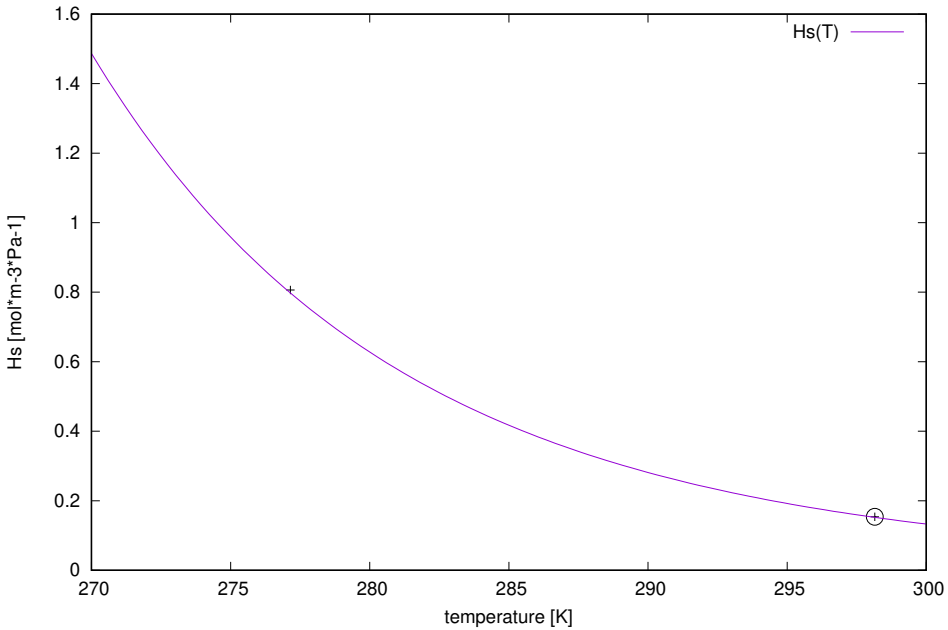



ref = 2914; chem = phenanthrene; casrn = 85-01-8; r2 = 1.00000

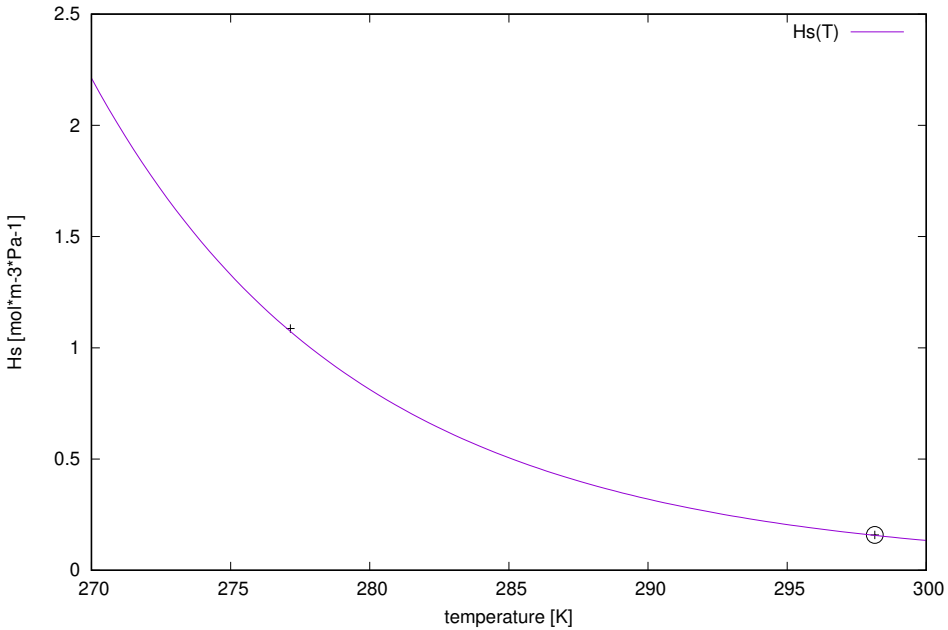

ref = 2914; chem = 2,3-benzindene; casrn = 86-73-7; r2 = 1.00000

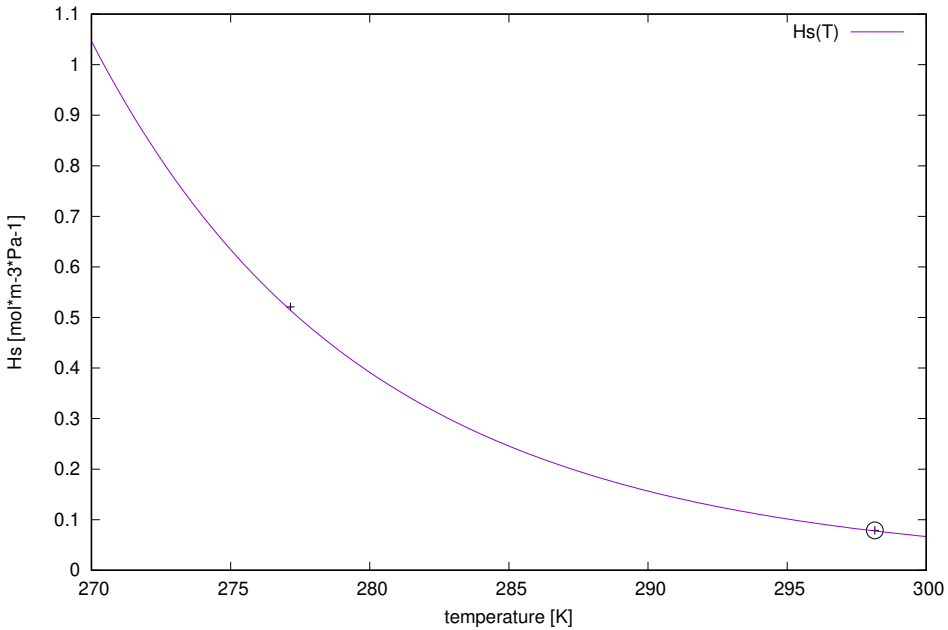

ref = 2921; chem = ethylbenzene; casrn = 100-41-4; r2 = 1.00000

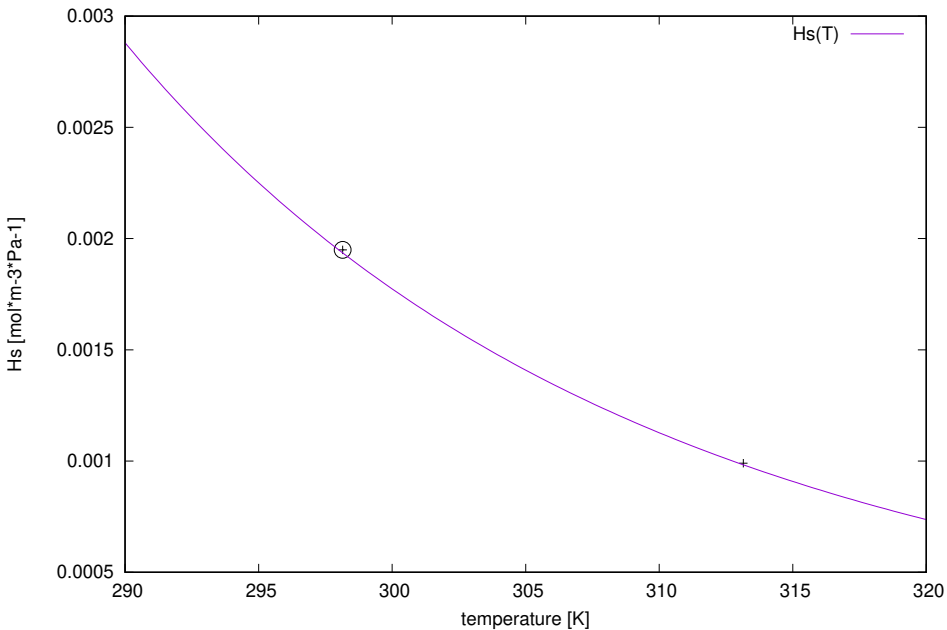

ref = 2921; chem = MTBE; casrn = 1634-04-4; r2 = 1.00000

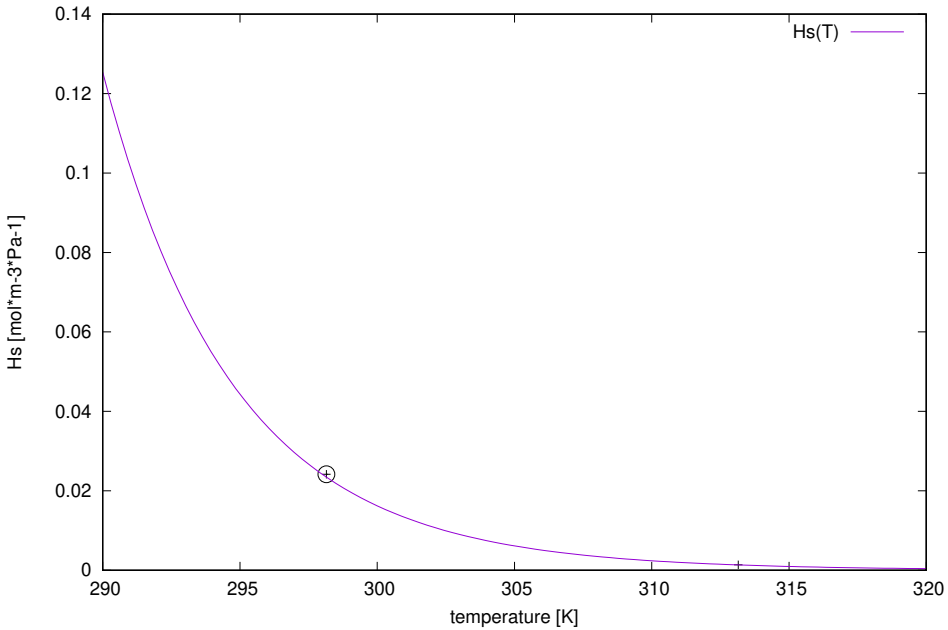

ref = 2921; chem = benzene; casrn = 71-43-2; r2 = 0.99129

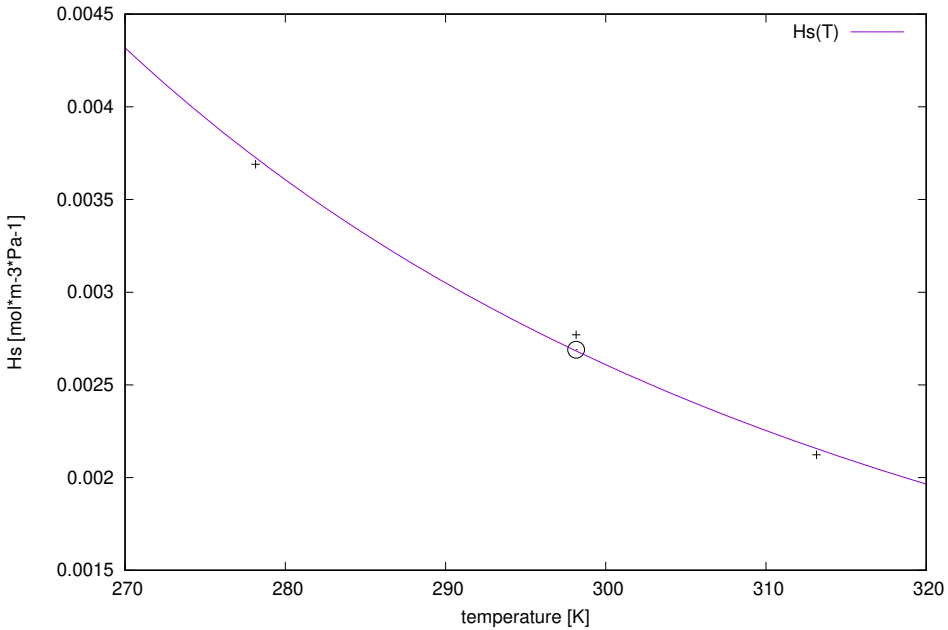

ref = 2921; chem = trichloroethene; casrn = 79-01-6; r2 = 0.99974

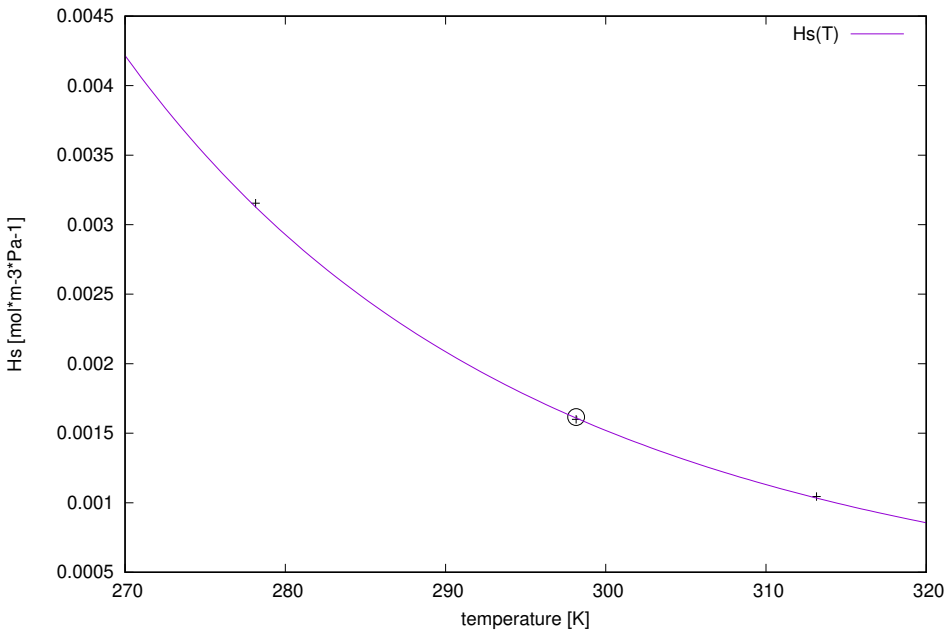

ref = 2921; chem = 1,2-dimethylbenzene; casrn = 95-47-6; r2 = 1.00000

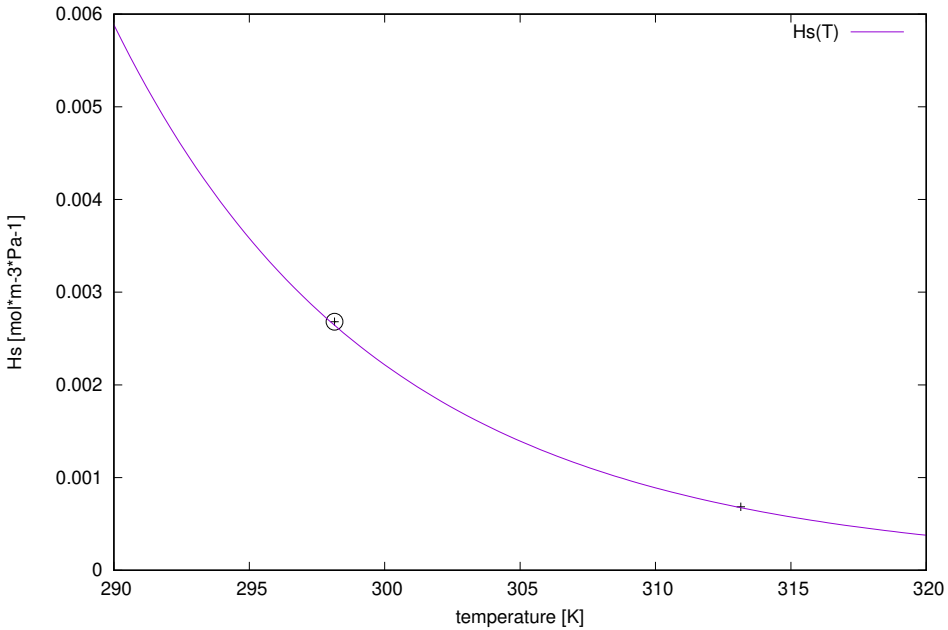

ref = 2922; chem = 1,3-dimethylbenzene; casrn = 108-38-3; r2 = 0.96737

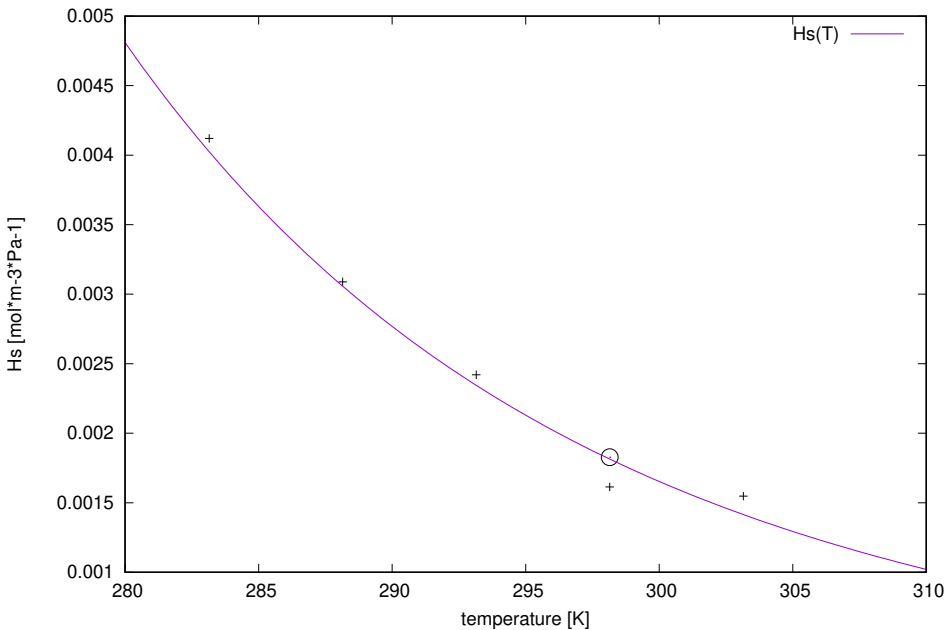



ref = 2922; chem = methylbenzene; casrn = 108-88-3; r2 = 0.99850

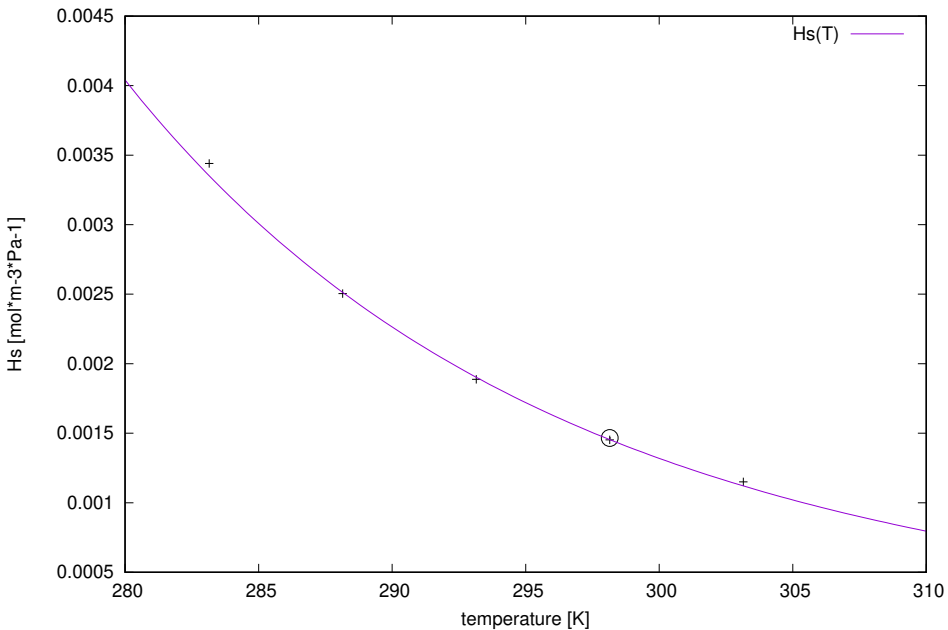

ref = 2922; chem = benzene; casrn = 71-43-2; r2 = 0.99641

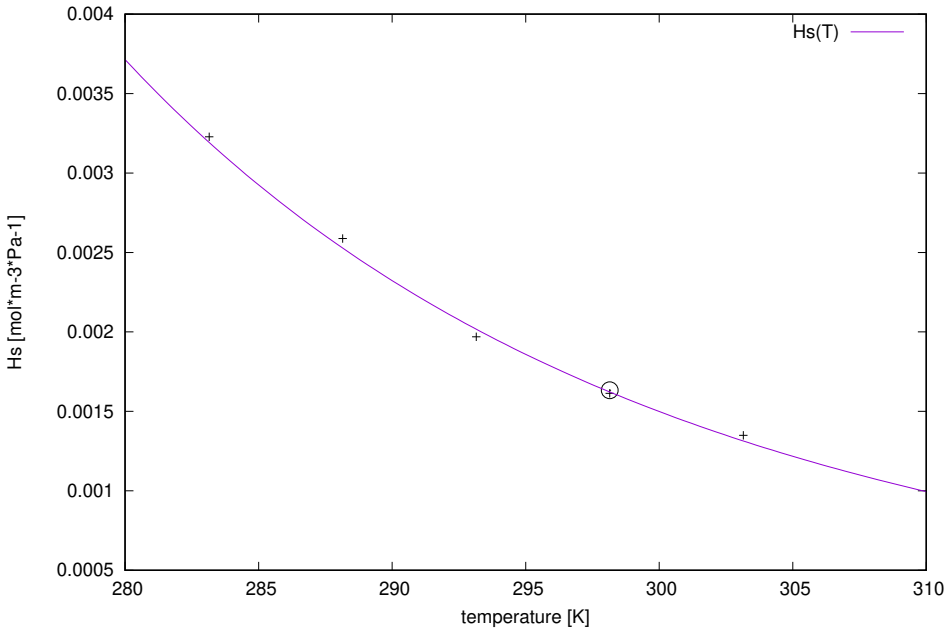

ref = 2926; chem = methoxybenzene; casrn = 100-66-3; r2 = 0.99904

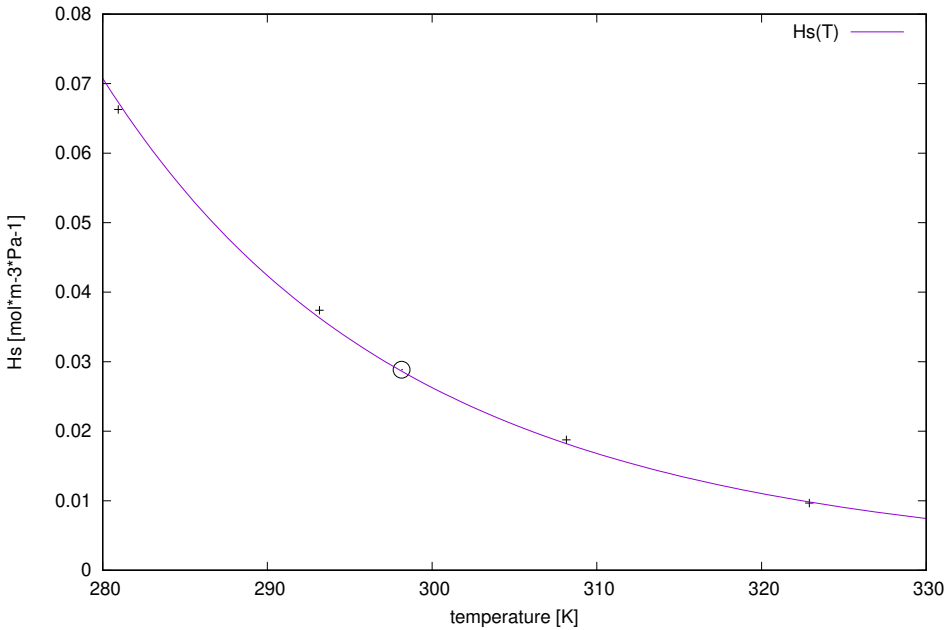

ref = 2926; chem = 1-bromo-4-methylbenzene; casrn = 106-38-7; r2 = 0.99379

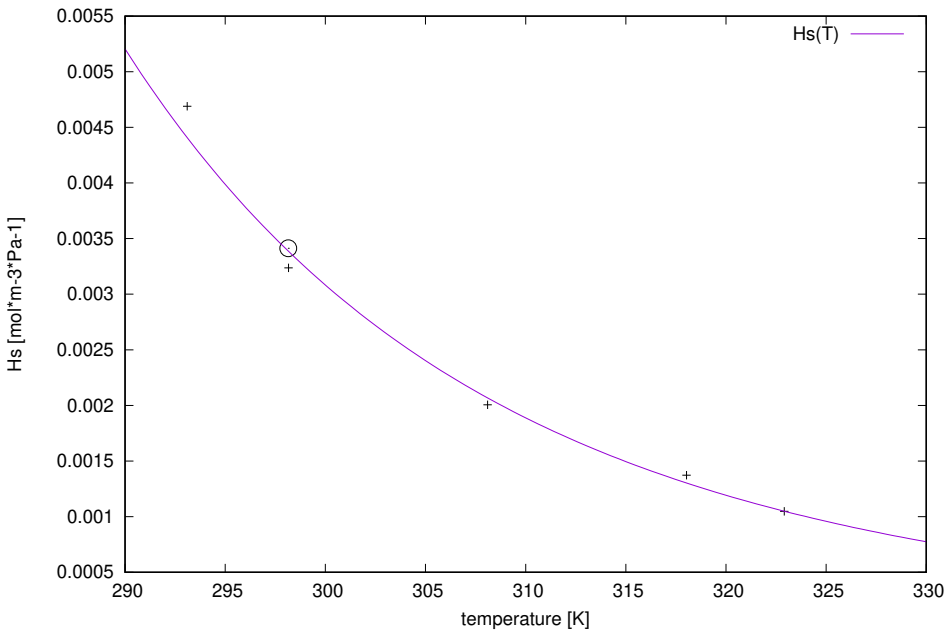

ref = 2926; chem = 1,2-difluorobenzene; casrn = 367-11-3; r2 = 0.99452

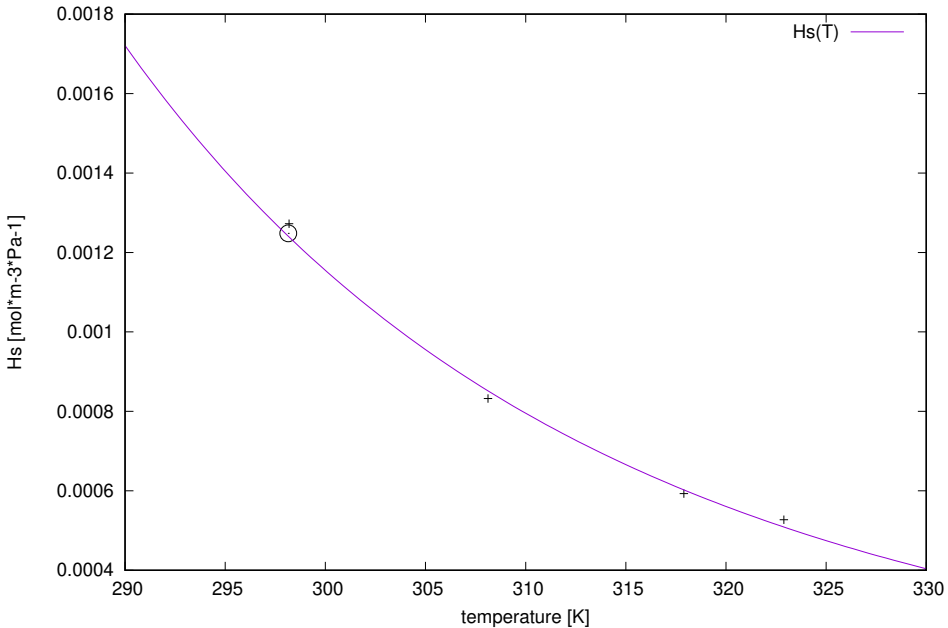

ref = 2926; chem = 1,2,3-trichlorobenzene; casrn = 87-61-6; r2 = 0.99966

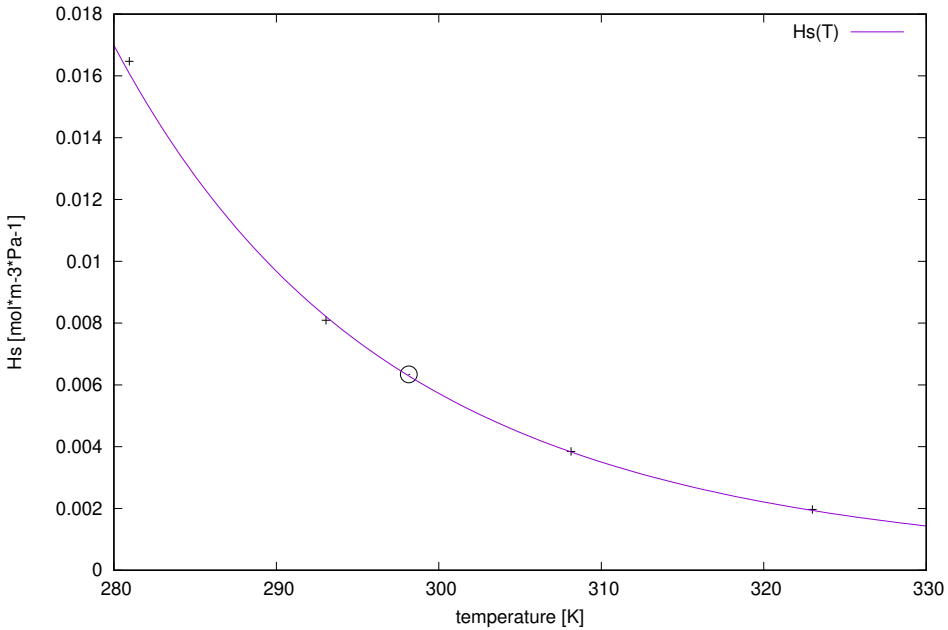

ref = 2926; chem = 1-methyl-2,4-dichlorobenzene; casrn = 95-73-8; r2 = 0.99480

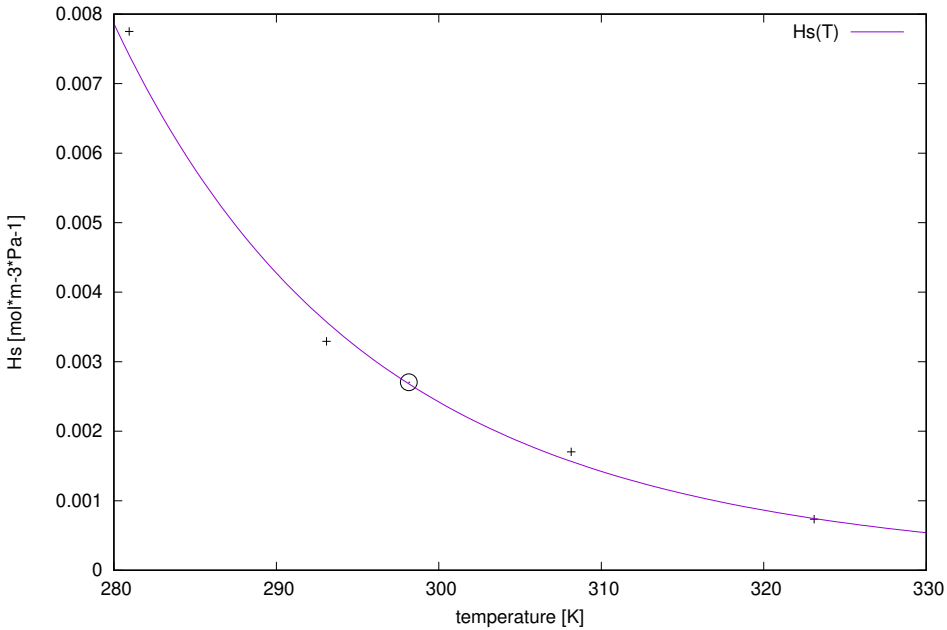

ref = 2928; chem = hydrogen sulfide; casrn = 7783-06-4; r2 = 0.98658

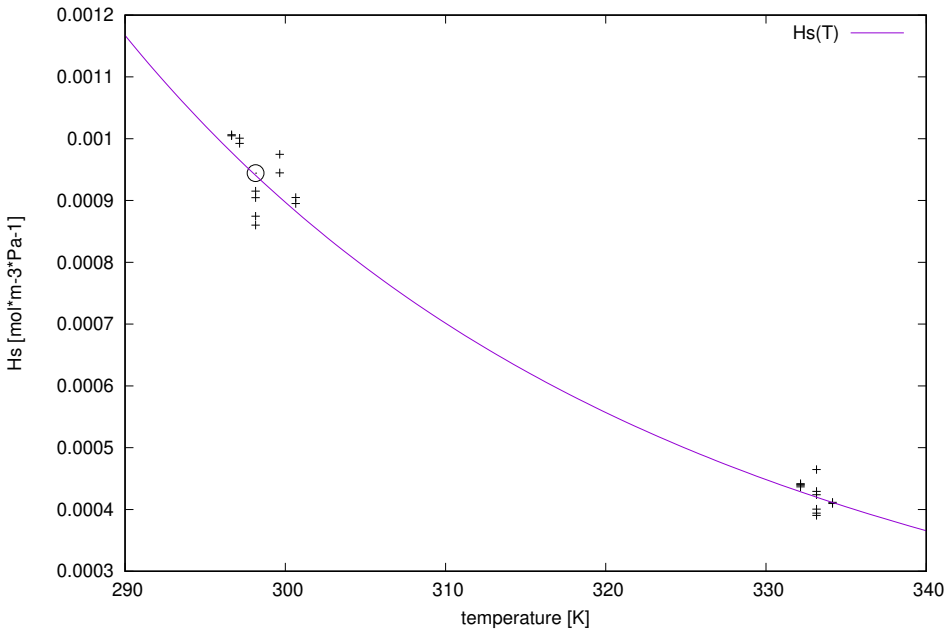



ref = 2929; chem = hydrogen sulfide; casrn = 7783-06-4; r2 = 0.99002

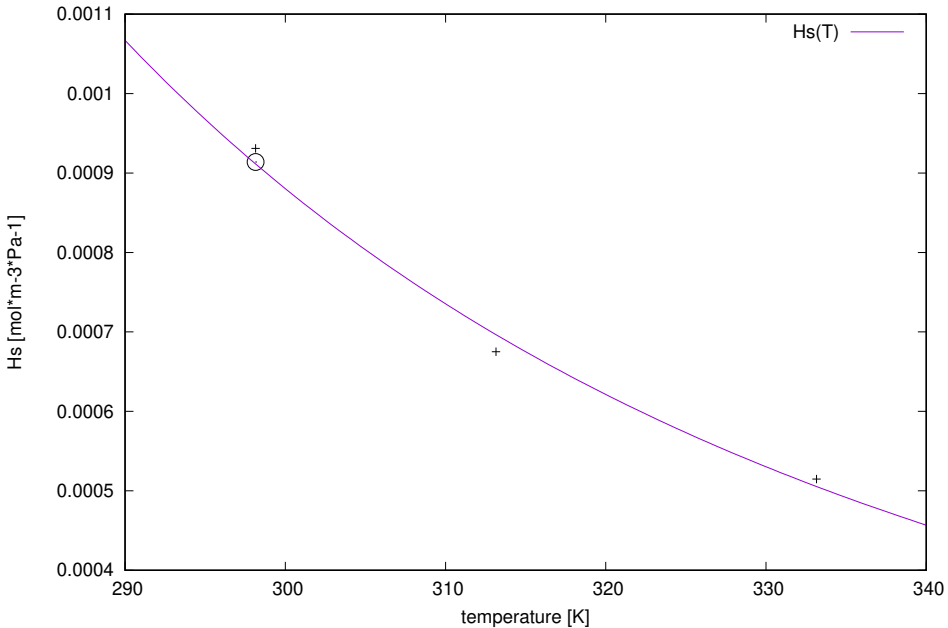

ref = 2931; chem = chlorobenzene; casrn = 108-90-7; r2 = 0.99999

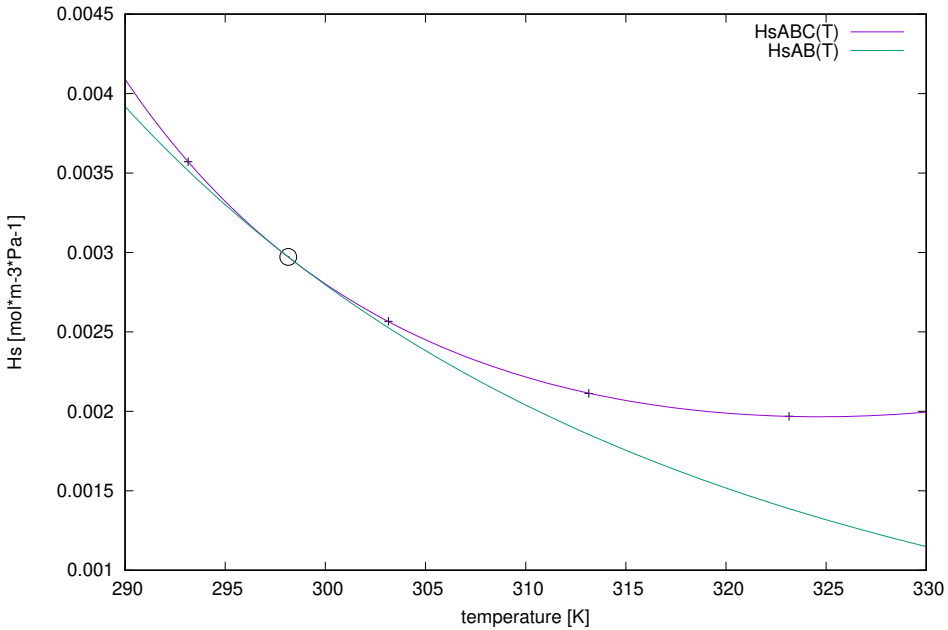

ref = 2931; chem = (\$E\$)-1,2-dichloroethene; casrn = 156-60-5; r2 = 0.99964

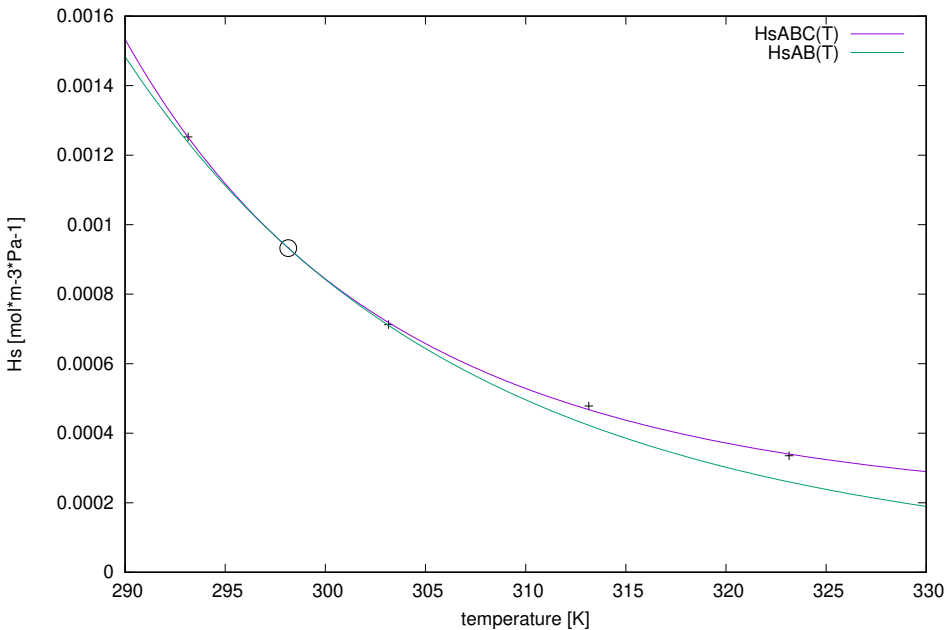

ref = 2931; chem = benzene; casrn = 71-43-2; r2 = 0.99998

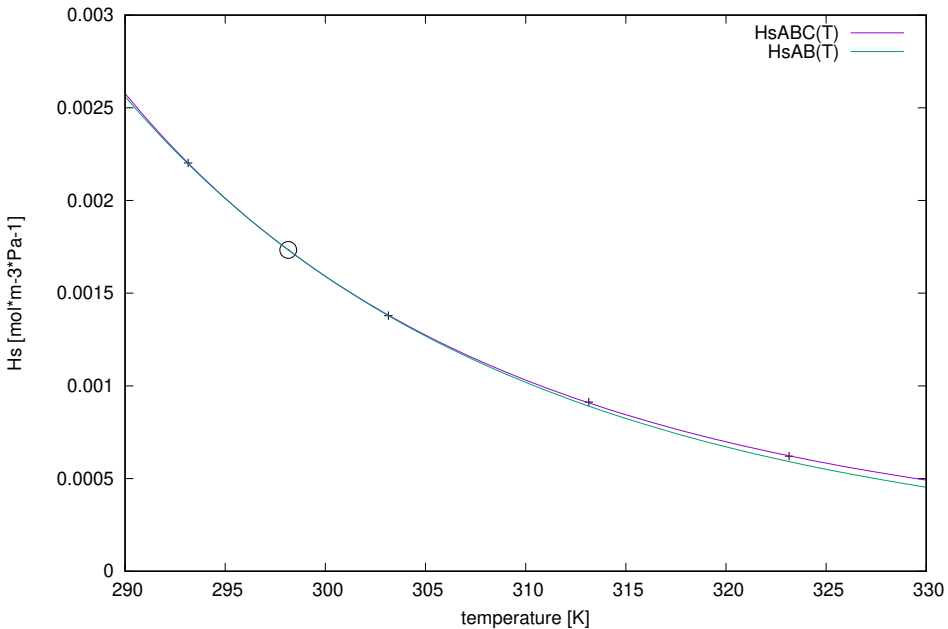

ref = 2931; chem = trichloroethene; casrn = 79-01-6; r2 = 0.99954

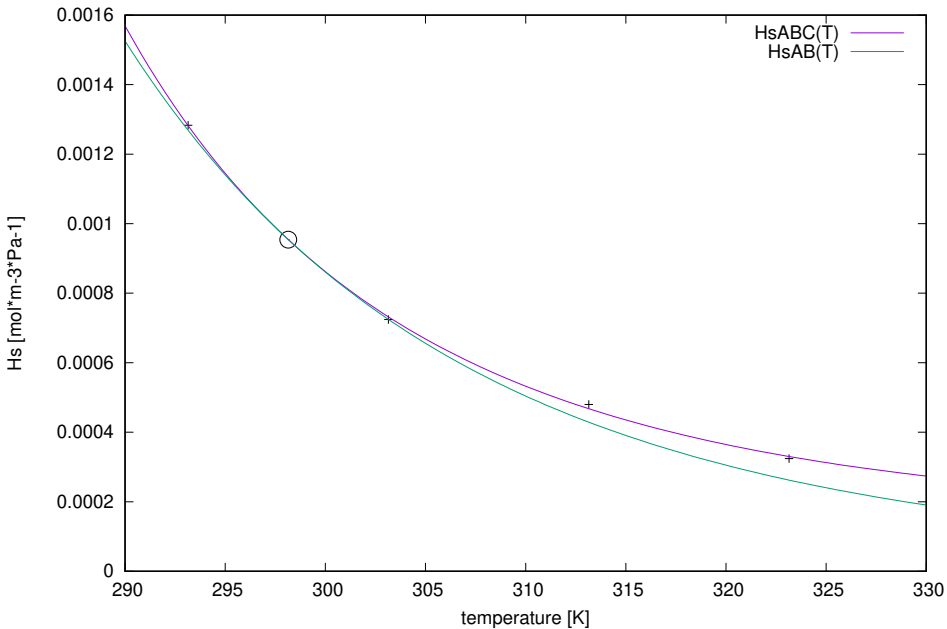

ref = 2936; chem = ethylcyclohexane; casrn = 1678-91-7; r2 = 1.00000

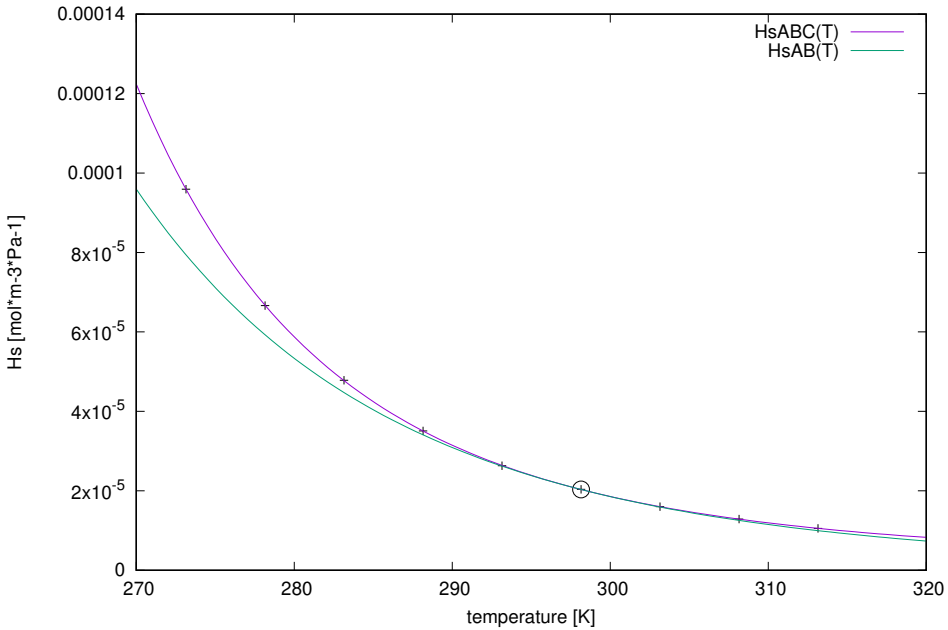

ref = 2936; chem = cis-1,2-dimethylcyclohexane; casrn = 2207-01-4; r2 = 1.00000

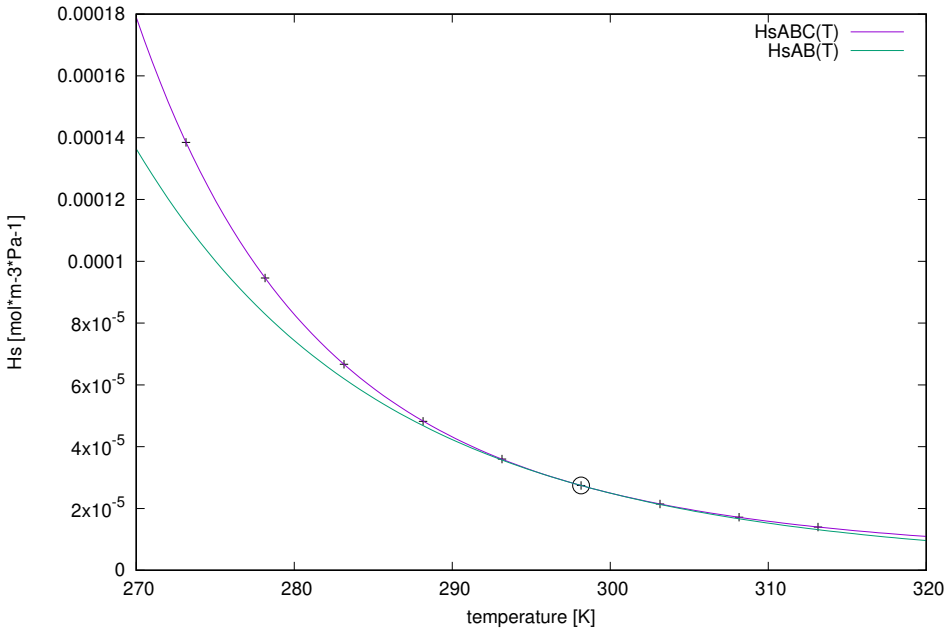

ref = 2936; chem = cyclooctane; casrn = 292-64-8; r2 = 1.00000

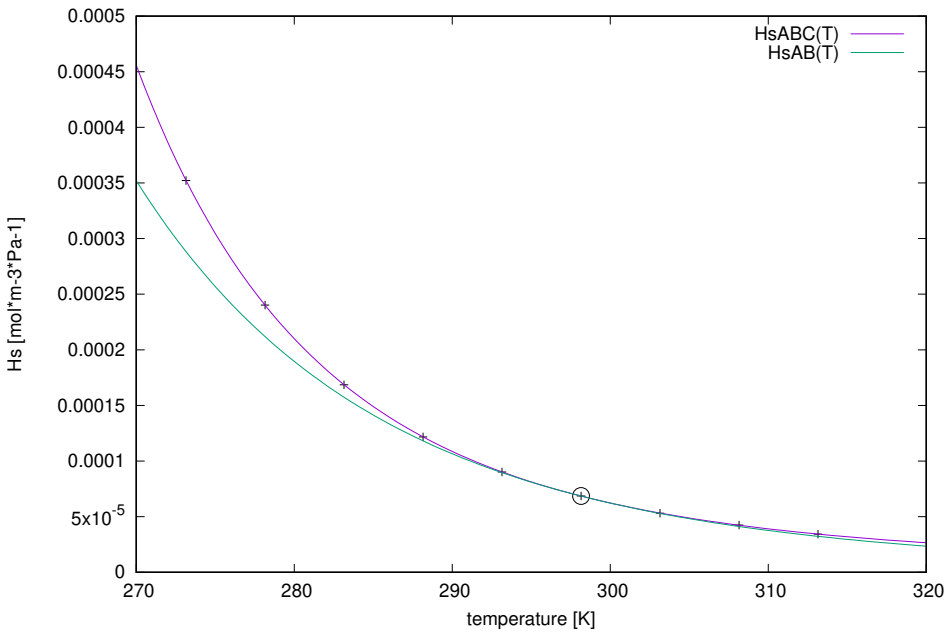



ref = 2936; chem = 2,2-dimethylhexane; casrn = 590-73-8; r2 = 1.00000

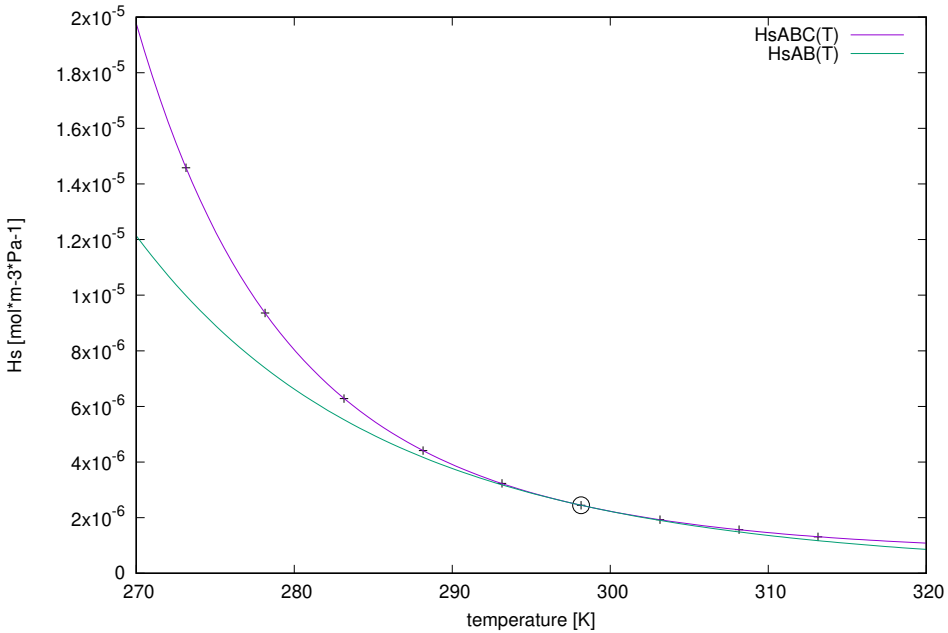

ref = 2936; chem = 2,5-dimethylhexane; casrn = 592-13-2; r2 = 1.00000

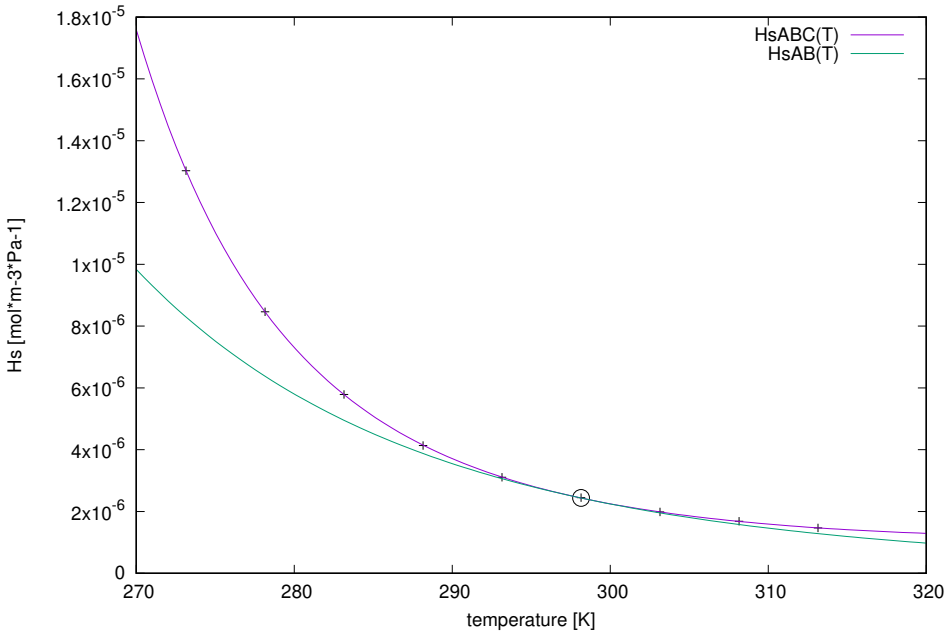

ref = 2936; chem = trans-1,2-dimethylcyclohexane; casrn = 6876-23-9; r2 = 1.00000

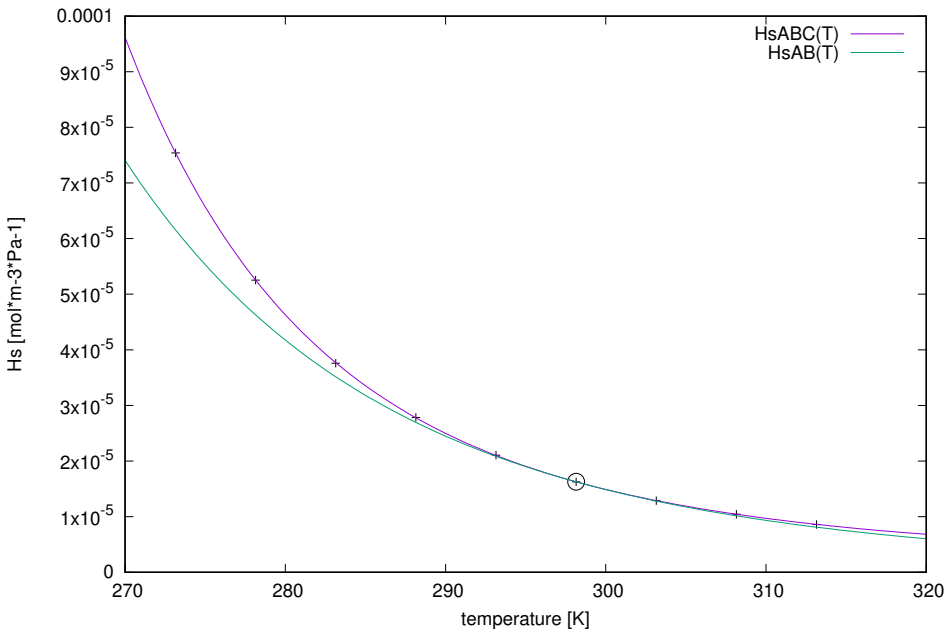

ref = 2936; chem = cyclooctene; casrn = 931-88-4; r2 = 1.00000

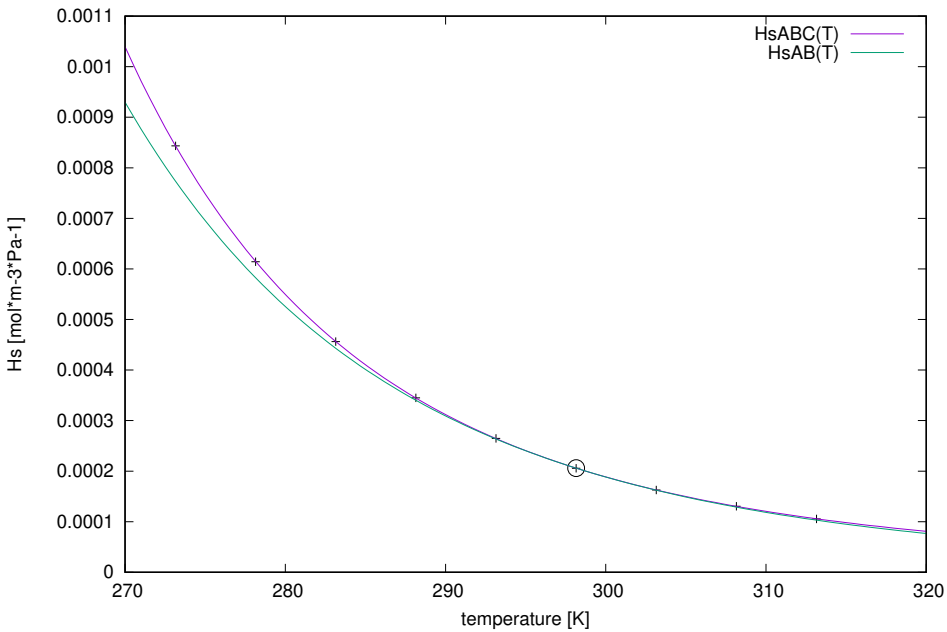

ref = 2939; chem = 1,1-dichloro-1-fluoroethane; casrn = 1717-00-6; r2 = 1.00000

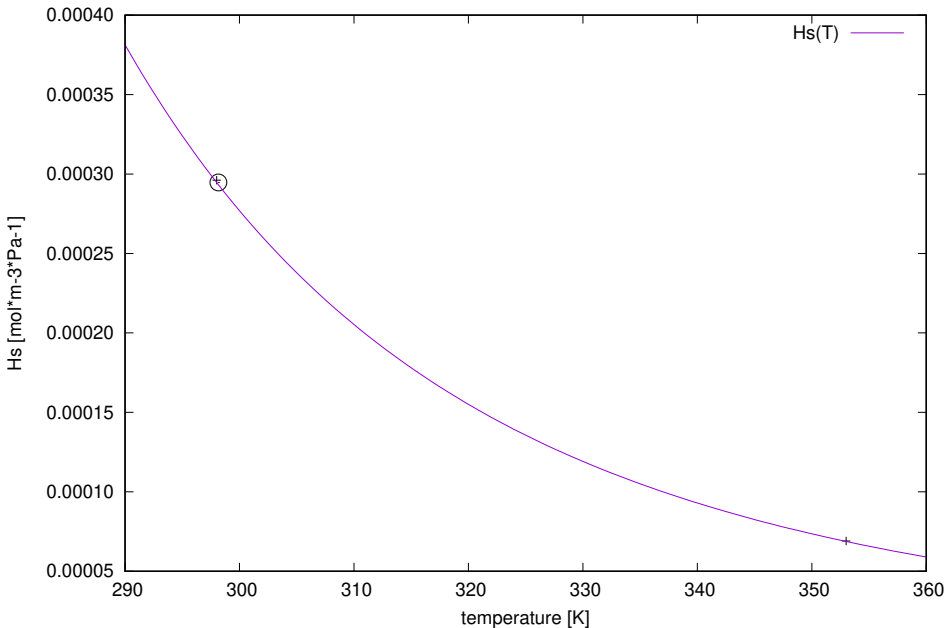

ref = 2939; chem = 1-chloro-1,2,2,2-tetrafluoroethane; casrn = 2837-89-0; r2 = 1.00000

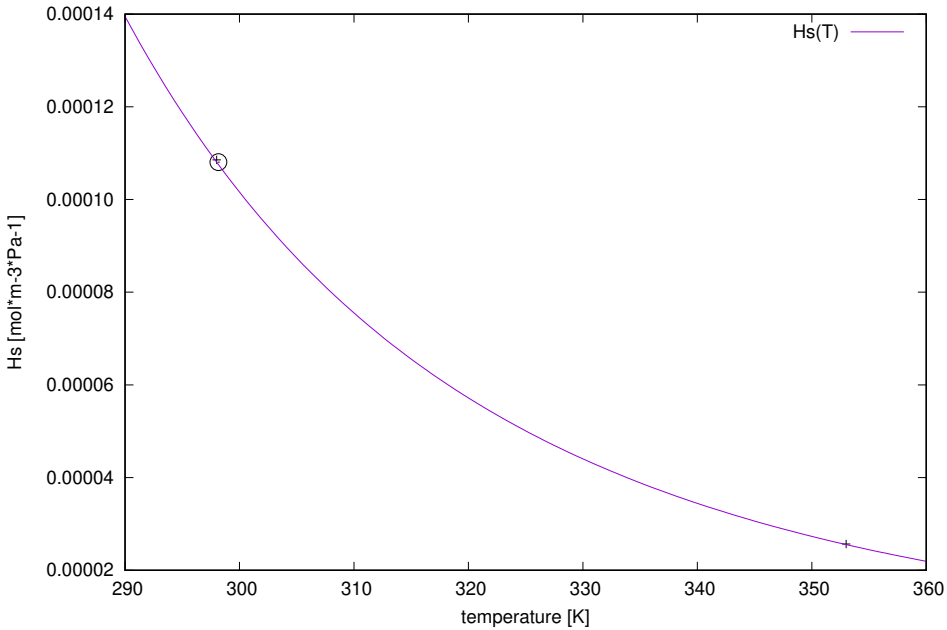

ref = 2939; chem = 2,2-dichloro-1,1,1-trifluoroethane; casrn = 306-83-2; r2 = 1.00000

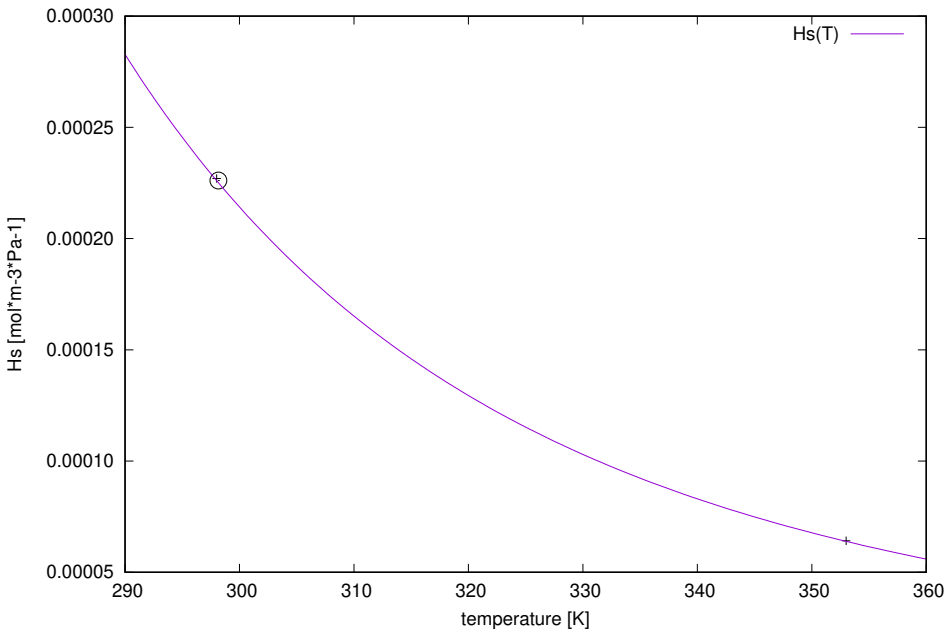

ref = 2939; chem = CF<sub>3</sub>CF<sub>2</sub>CHCl<sub>2</sub>; casrn = 422-56-0; r2 = 1.00000

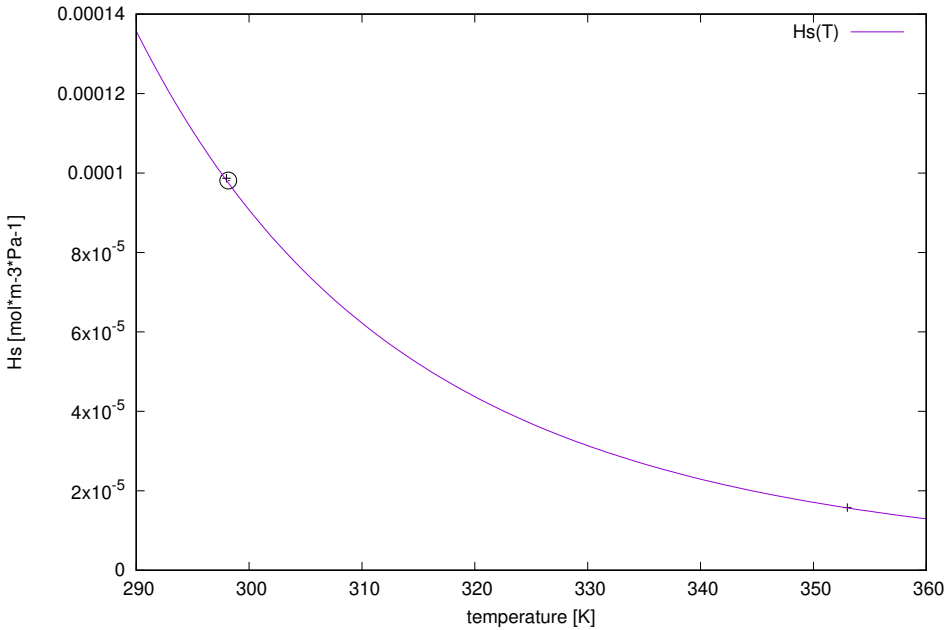



ref = 2939; chem = CCIF2CF2CHClF; casrn = 507-55-1; r2 = 1.00000

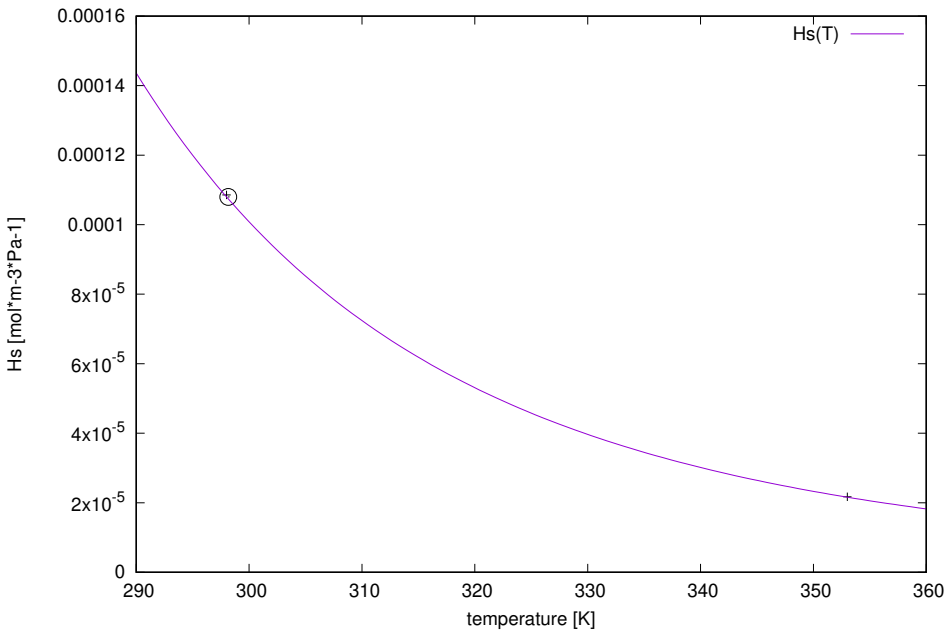

ref = 2939; chem = 1-chloro-1,1-difluoroethane; casrn = 75-68-3; r2 = 1.00000

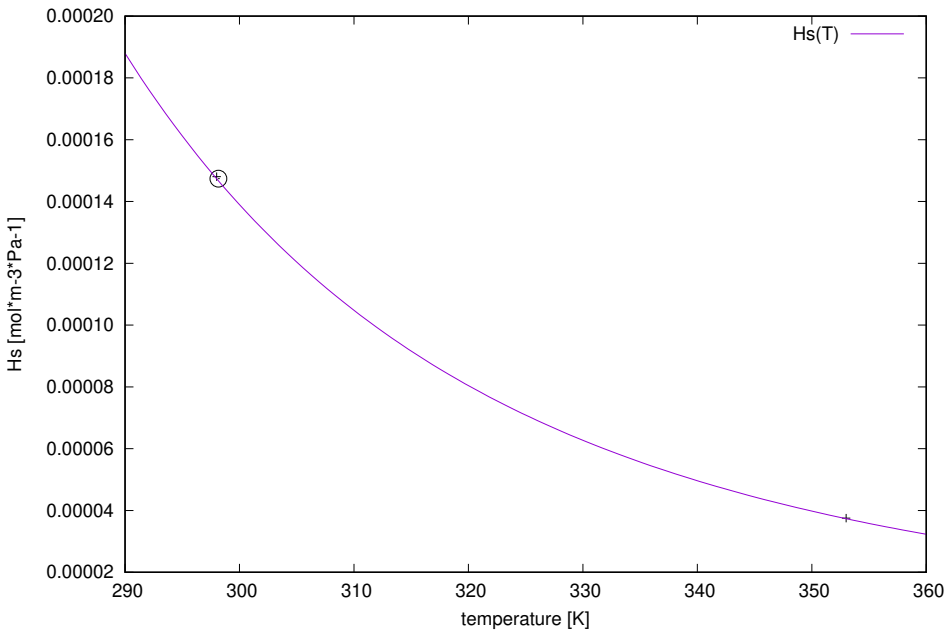

ref = 2942; chem = benzene; casrn = 71-43-2; r2 = 0.99949

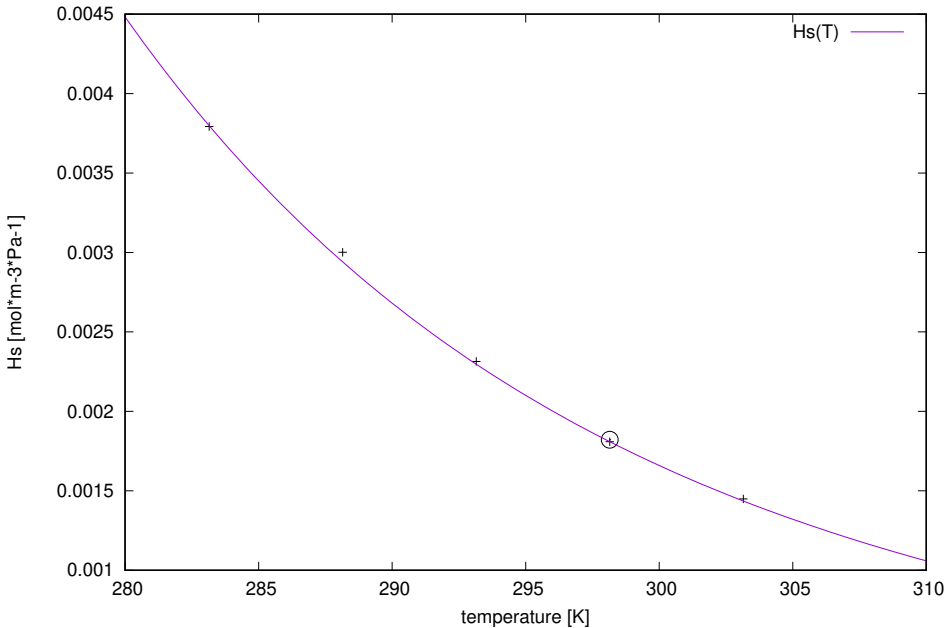

ref = 2952; chem = tetrachloromethane; casrn = 56-23-5; r2 = 0.99556

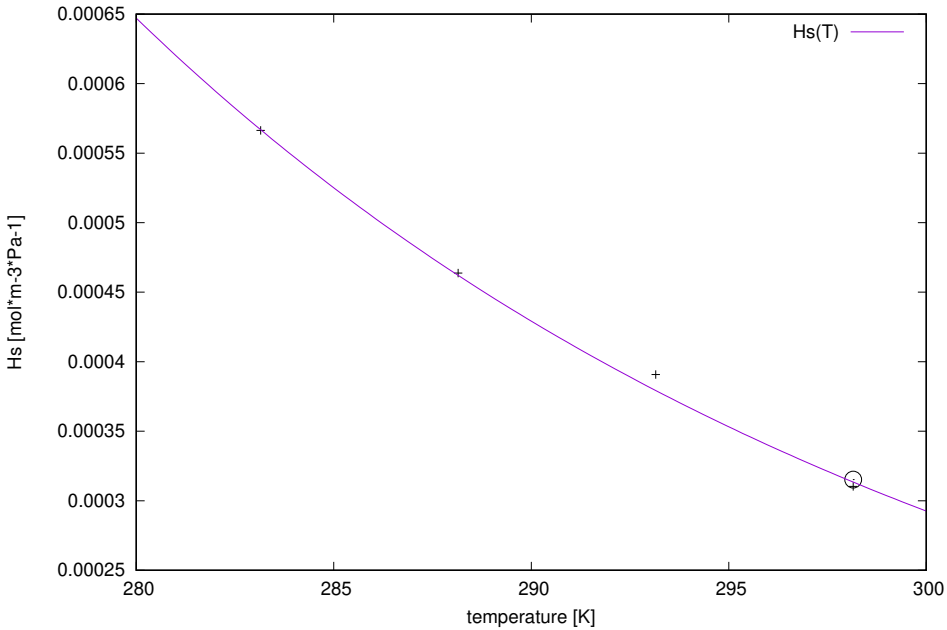

ref = 2952; chem = trichloromethane; casrn = 67-66-3; r2 = 1.00000

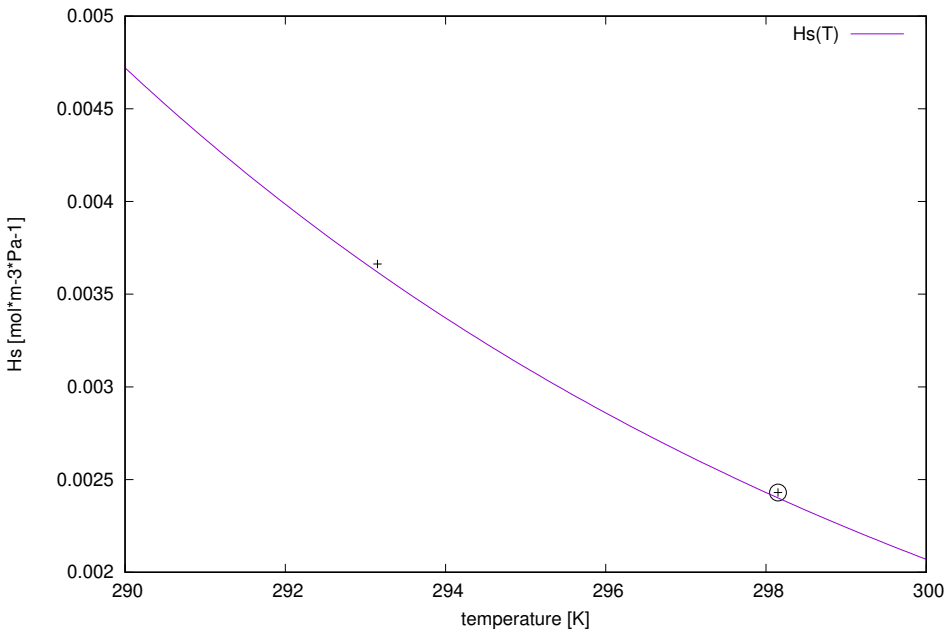

ref = 2952; chem = iodomethane; casrn = 74-88-4; r2 = 0.99112

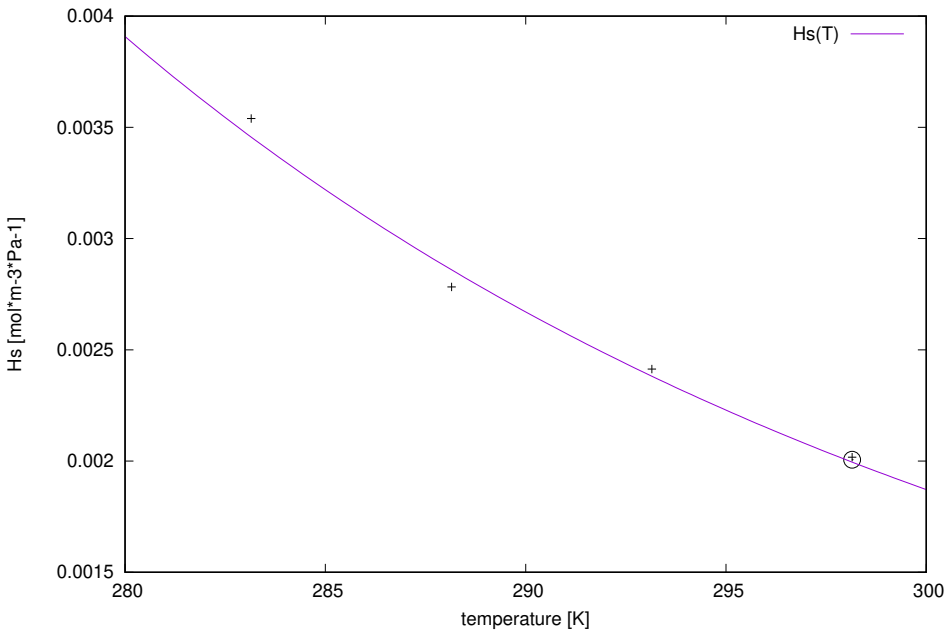

ref = 2952; chem = trichlorofluoromethane; casrn = 75-69-4; r2 = 0.96053

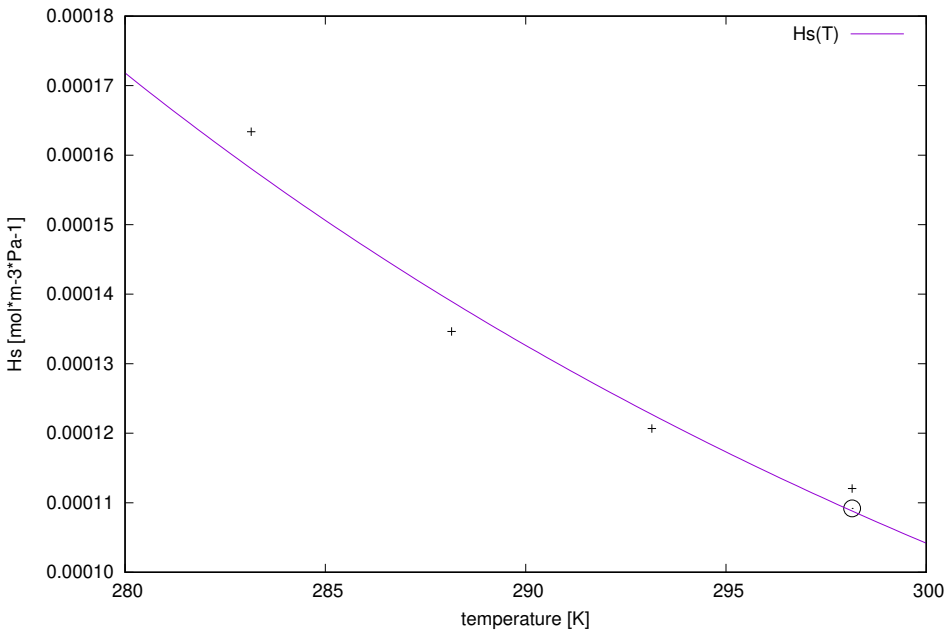

ref = 2953; chem = methylbenzene; casrn = 108-88-3; r2 = 0.99844

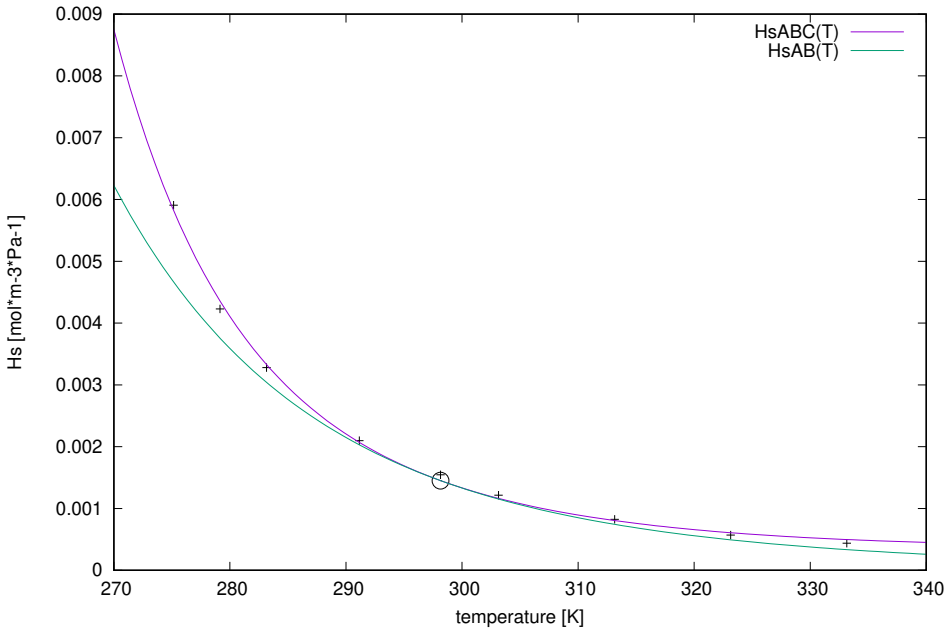



ref = 2953; chem = trichloromethane; casrn = 67-66-3; r2 = 0.99760

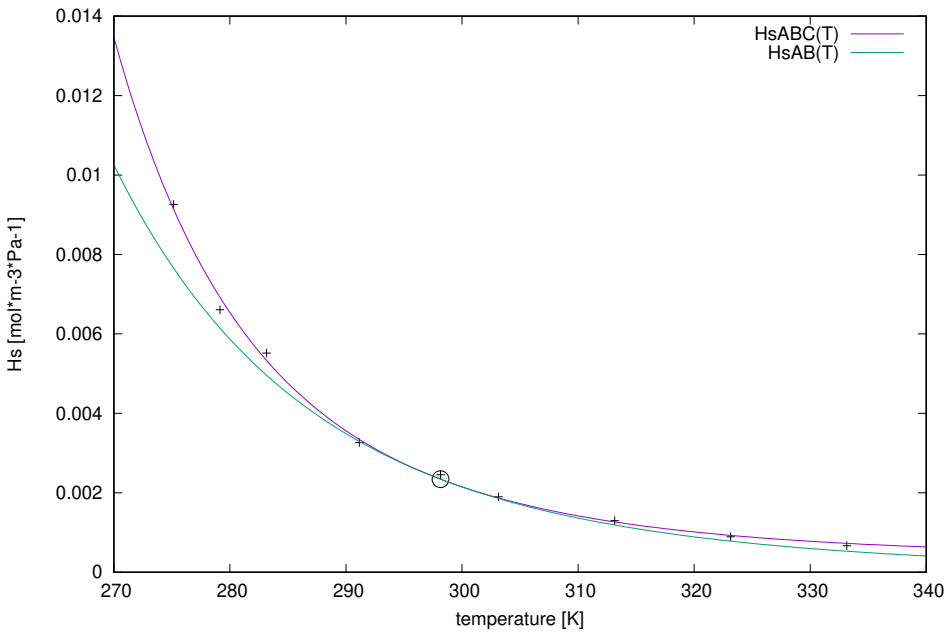

ref = 2953; chem = benzene; casrn = 71-43-2; r2 = 0.99768

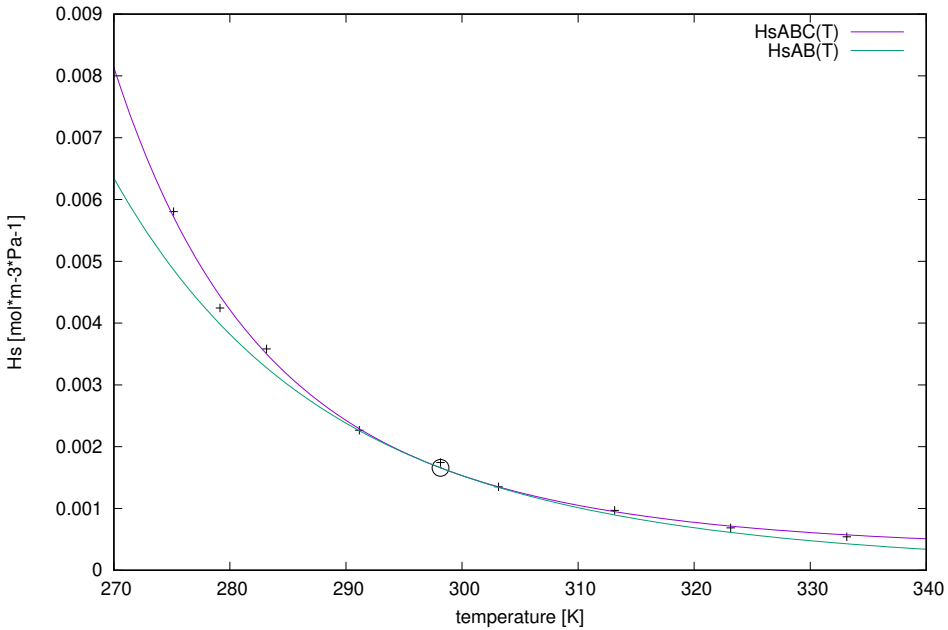

ref = 2953; chem = 1,1-dichloroethane; casrn = 75-34-3; r2 = 0.99731

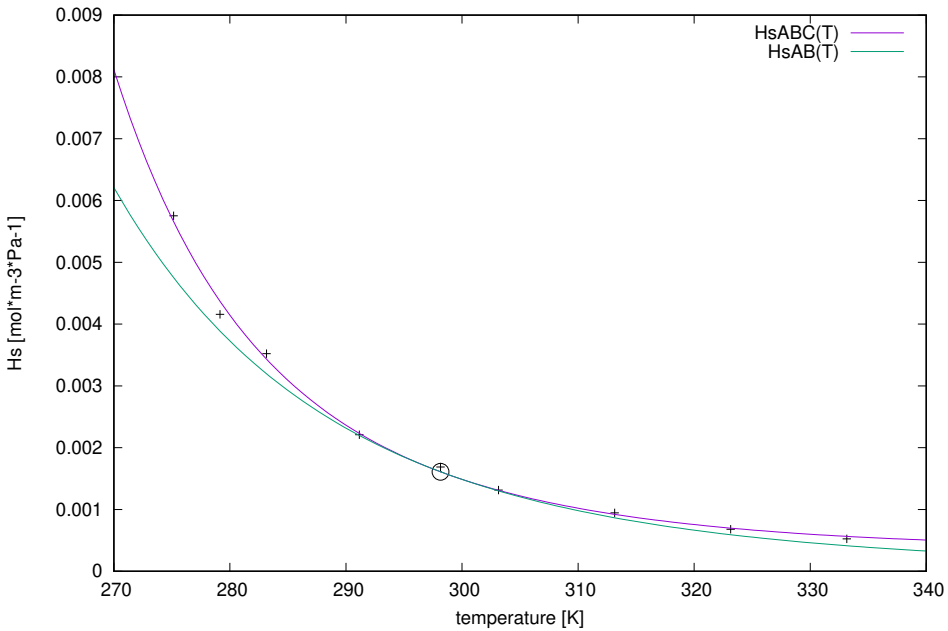

ref = 2953; chem = trichloroethene; casrn = 79-01-6; r2 = 0.99863

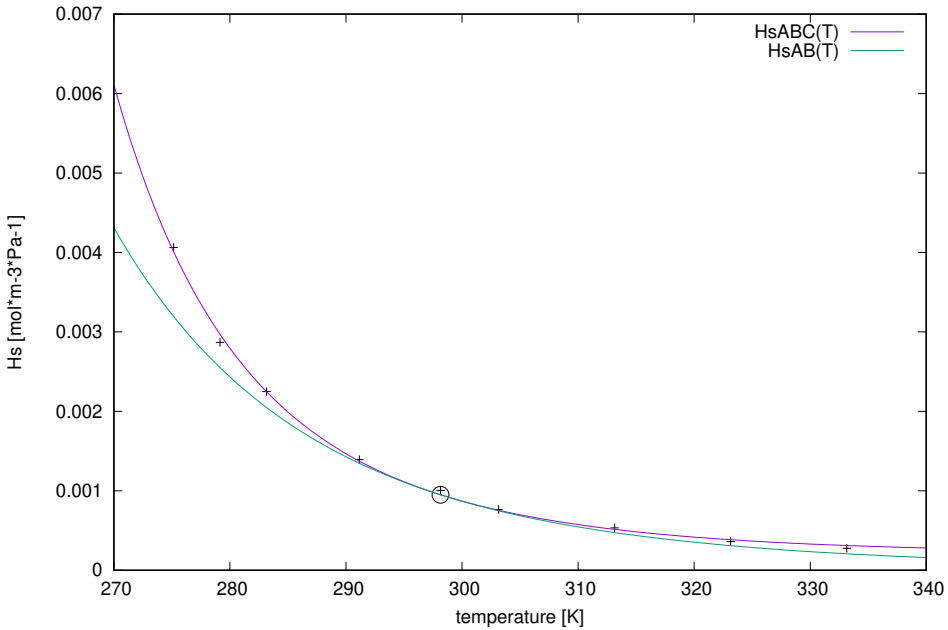

ref = 2980; chem = cyclohexane; casrn = 110-82-7; r2 = 0.99773

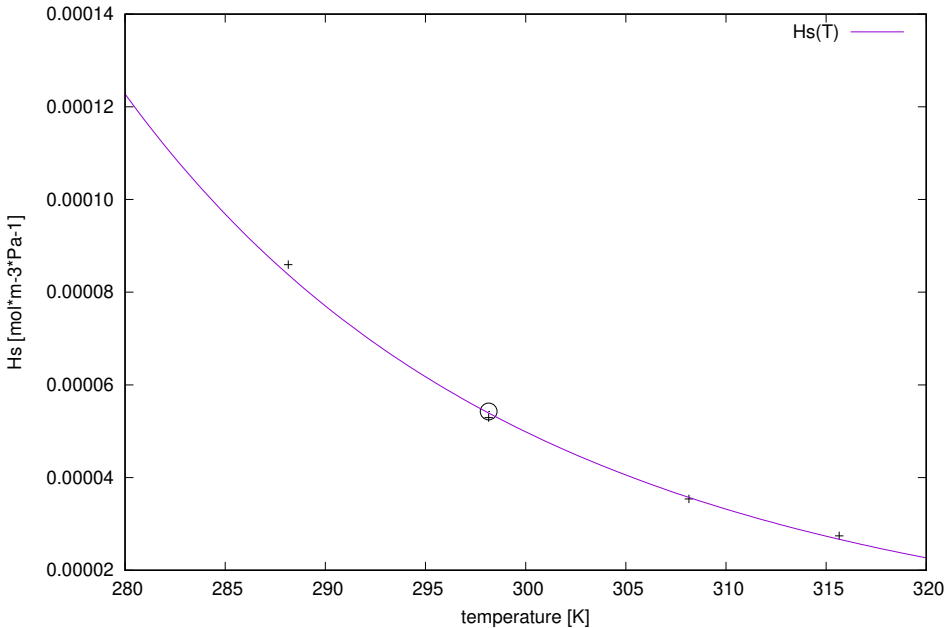

ref = 2981; chem = ethylbenzene; casrn = 100-41-4; r2 = 0.99803

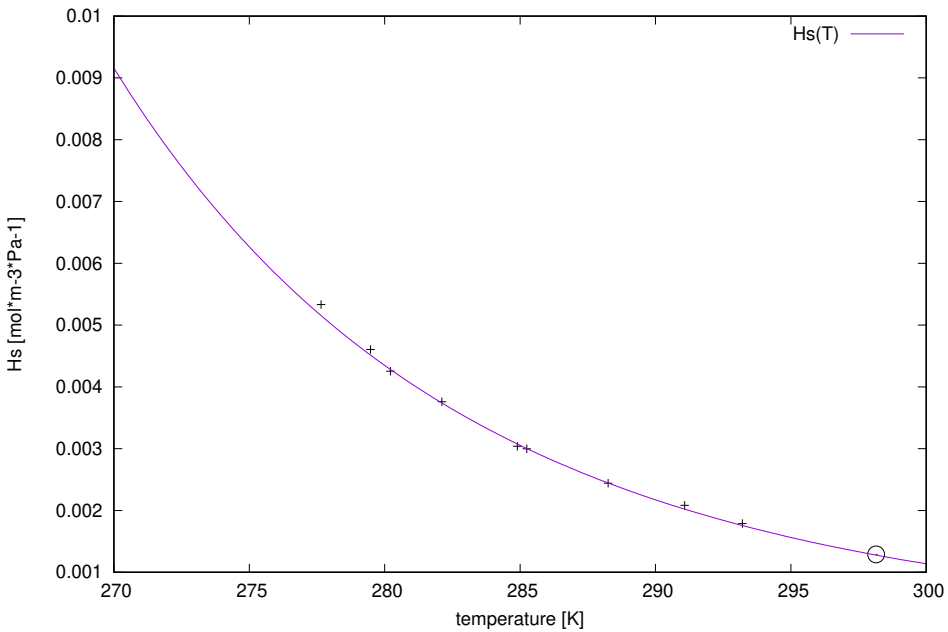

ref = 2981; chem = methylbenzene; casrn = 108-88-3; r2 = 0.99818

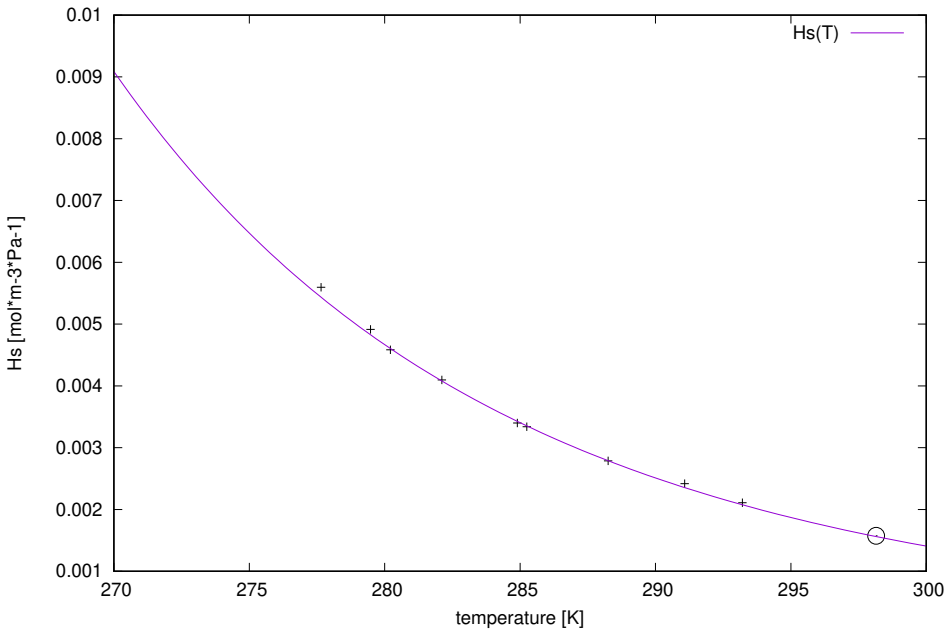

ref = 2981; chem = benzene; casrn = 71-43-2; r2 = 0.99806

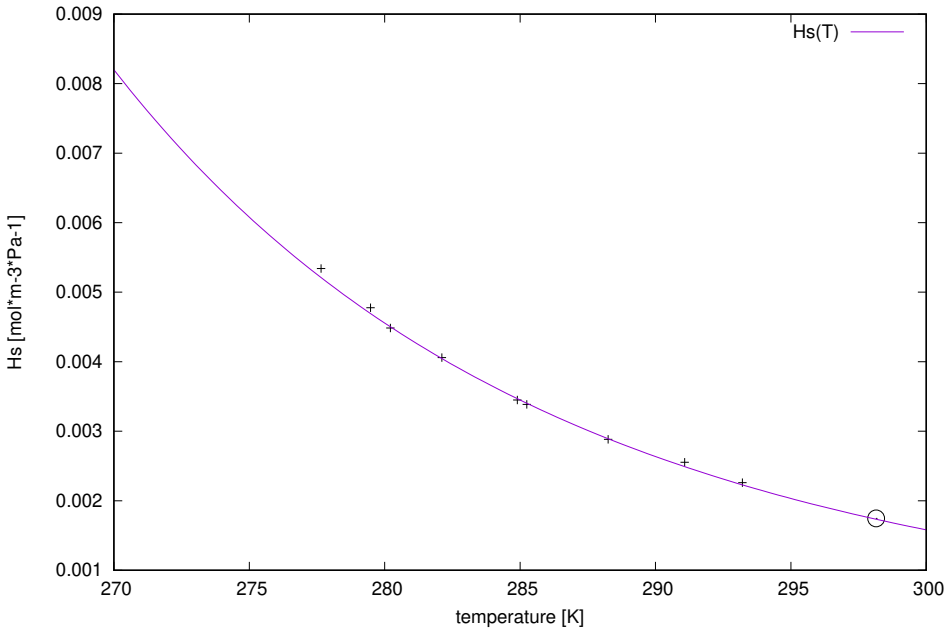



ref = 2982; chem = bromobenzene; casrn = 108-86-1; r2 = 0.98547

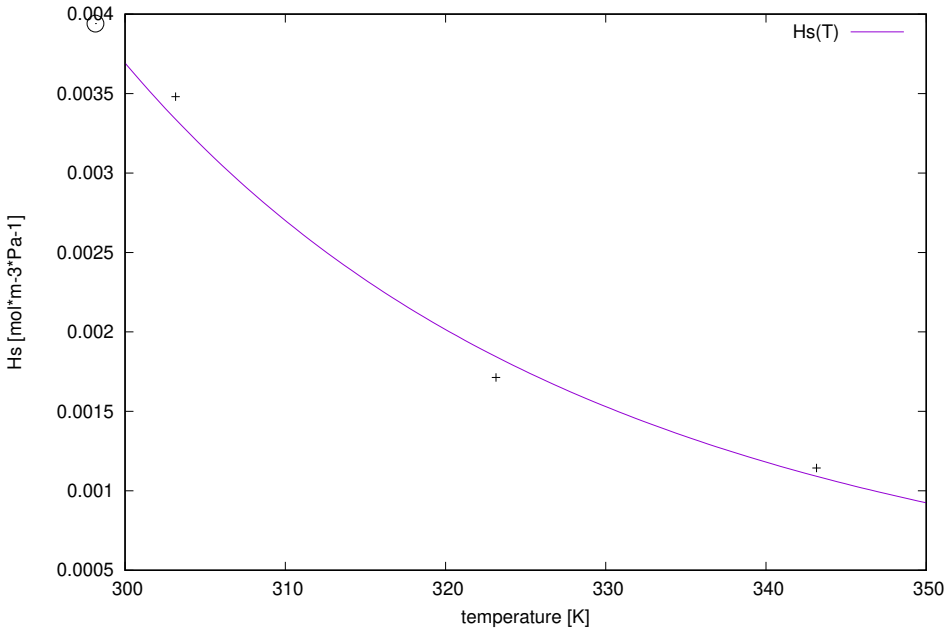

ref = 2982; chem = methylbenzene; casrn = 108-88-3; r2 = 0.99998

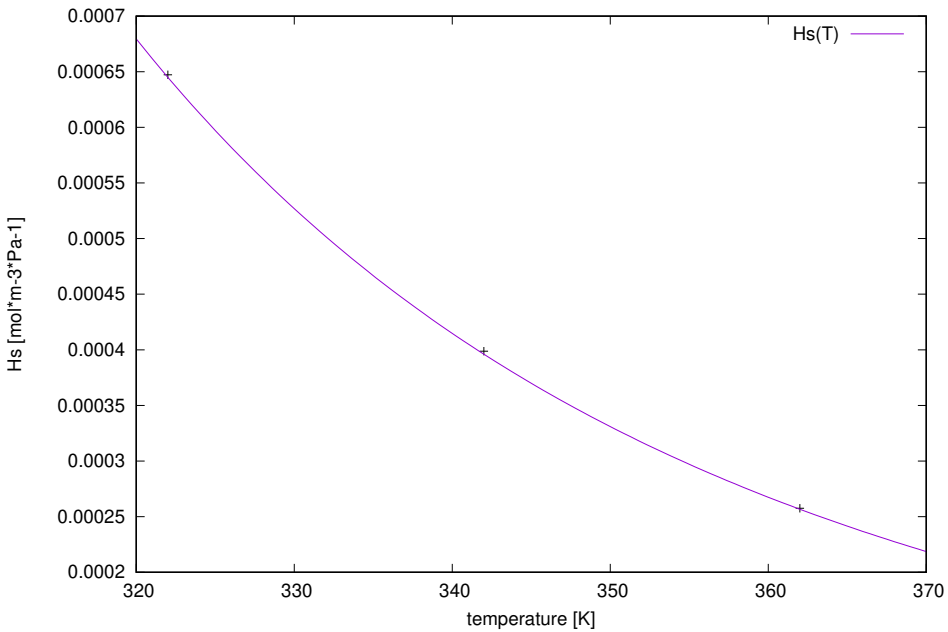

ref = 2982; chem = chlorobenzene; casrn = 108-90-7; r2 = 0.86507

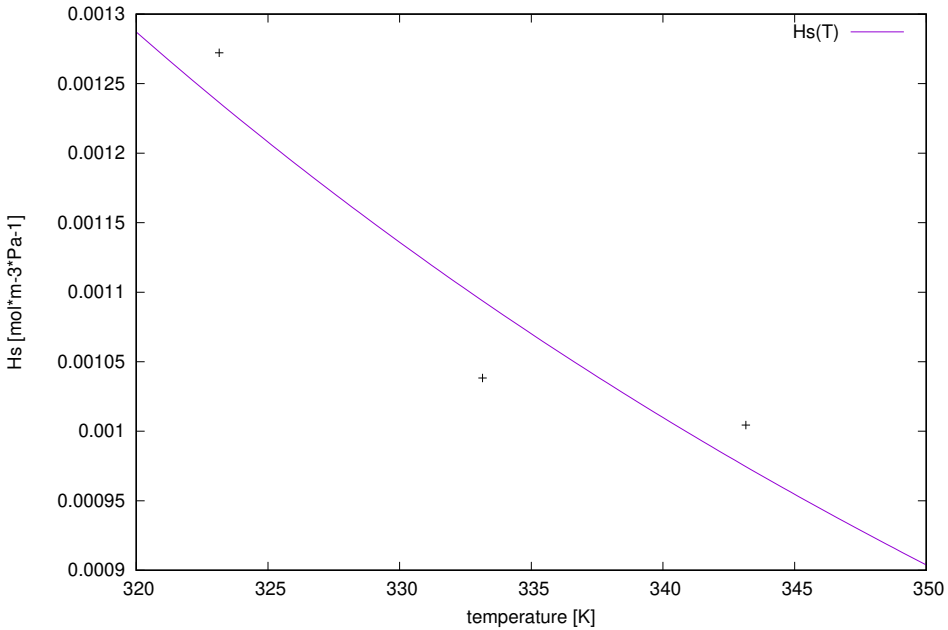

ref = 2982; chem = benzene; casrn = 71-43-2; r2 = 0.99816

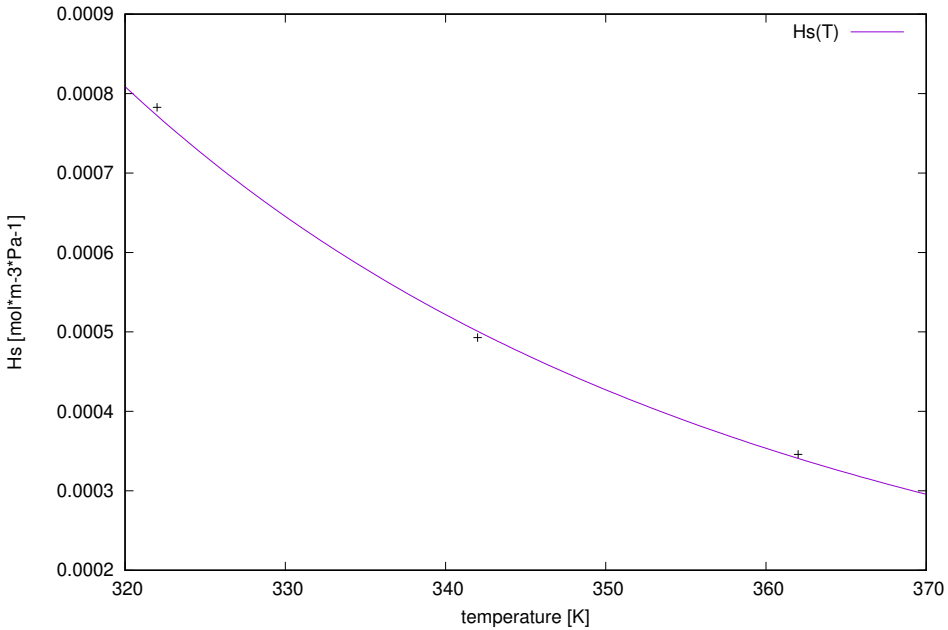

ref = 2984; chem = ethylbenzene; casrn = 100-41-4; r2 = 0.99767

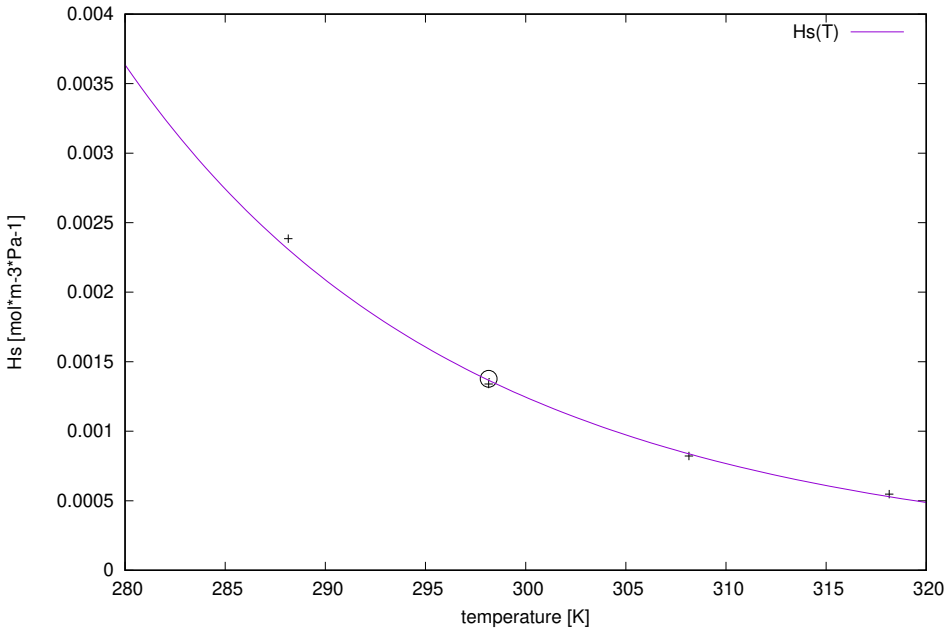

ref = 2984; chem = 1,3,5-trimethylbenzene; casrn = 108-67-8; r2 = 0.99963

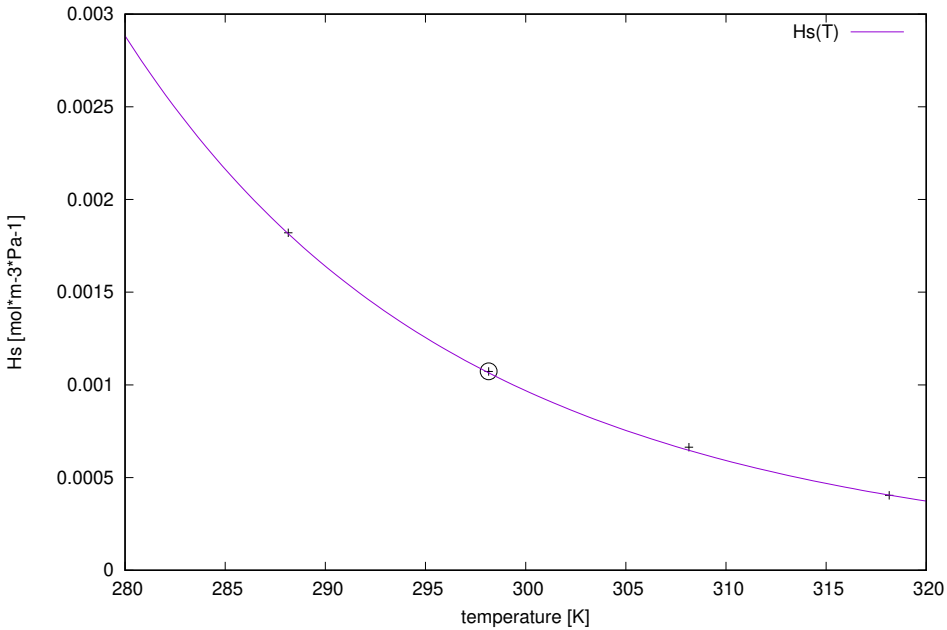

ref = 2984; chem = methylbenzene; casrn = 108-88-3; r2 = 0.99917

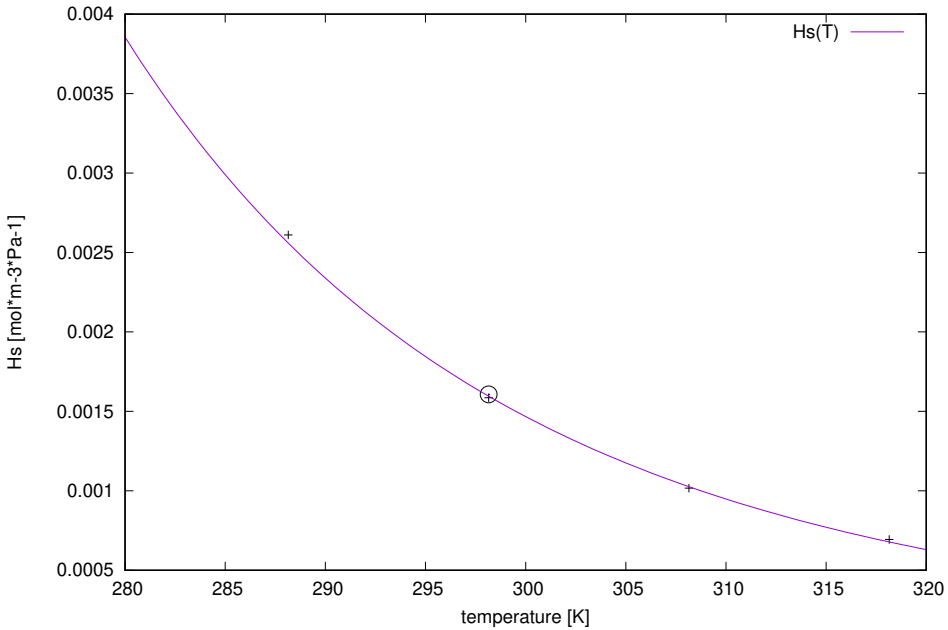

ref = 2984; chem = benzene; casrn = 71-43-2; r2 = 0.99958

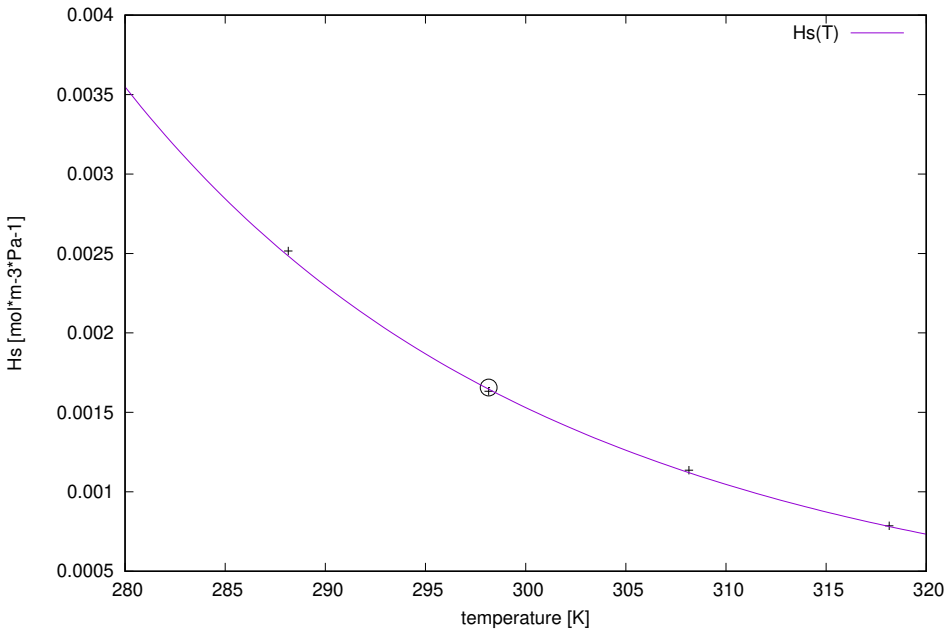



ref = 2987; chem = benzenenitrile; casrn = 100-47-0; r2 = 0.99200

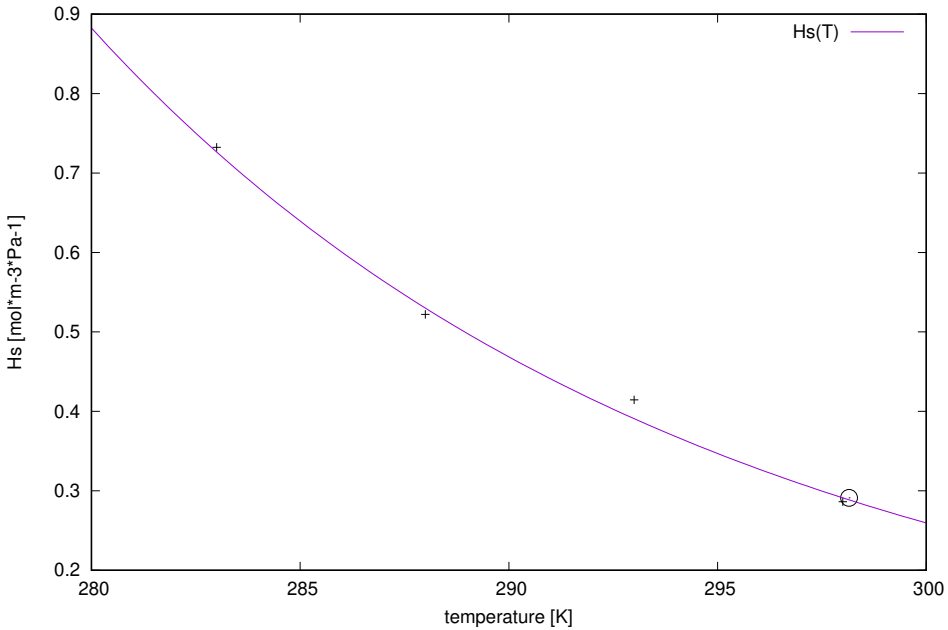

ref = 2987; chem = methylbenzene; casrn = 108-88-3; r2 = 0.91594

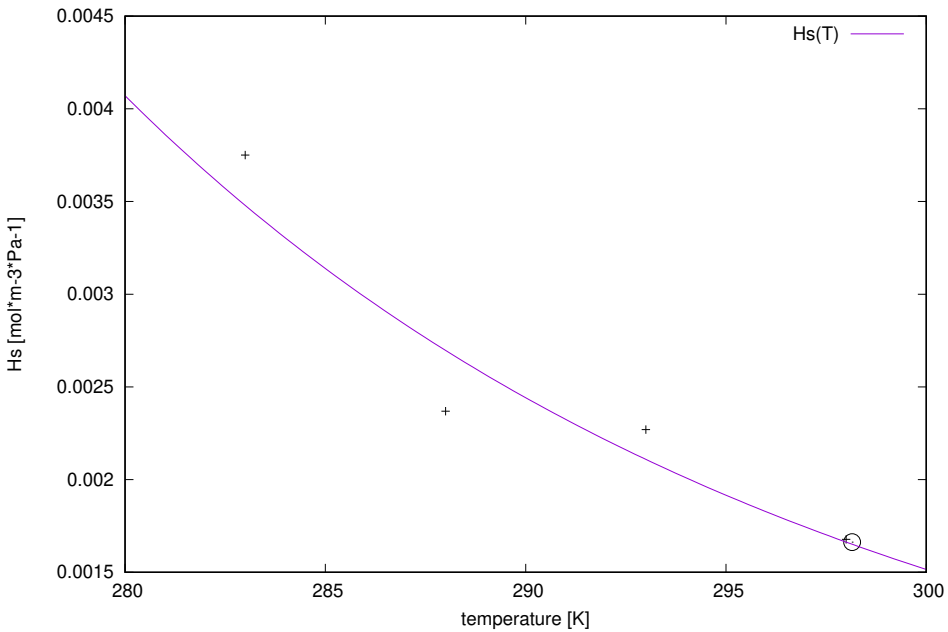

ref = 2993; chem = 4:2 FTO; casrn = 19430-93-4; r2 = 0.99779

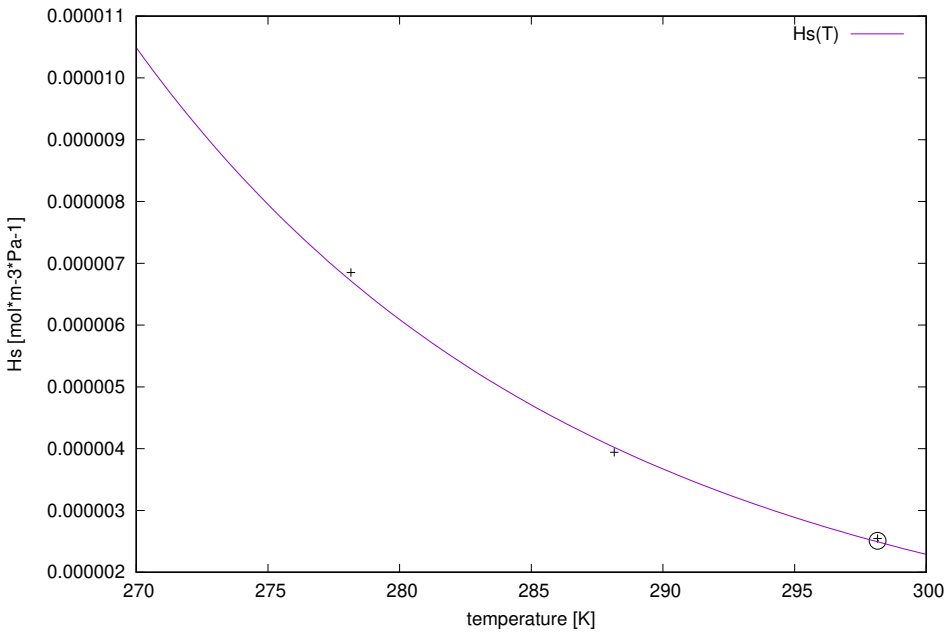

ref = 2993; chem = 4:2 FTOH; casrn = 2043-47-2; r2 = 0.99886

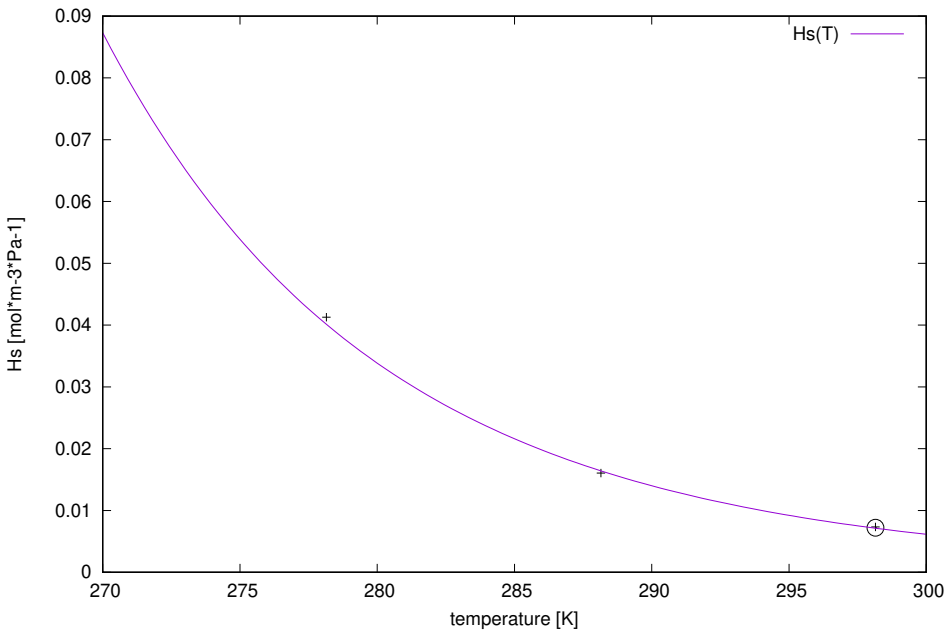

ref = 2993; chem = 8:2 FTO; casrn = 21652-58-4; r2 = 0.98709

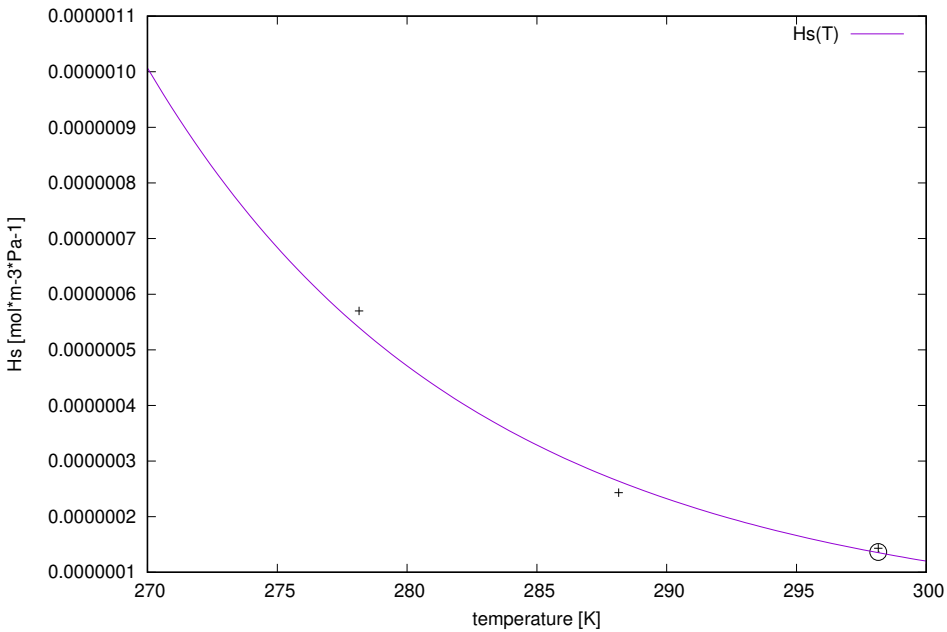

ref = 2993; chem = 6:2 FTO; casrn = 25291-17-2; r2 = 0.99337

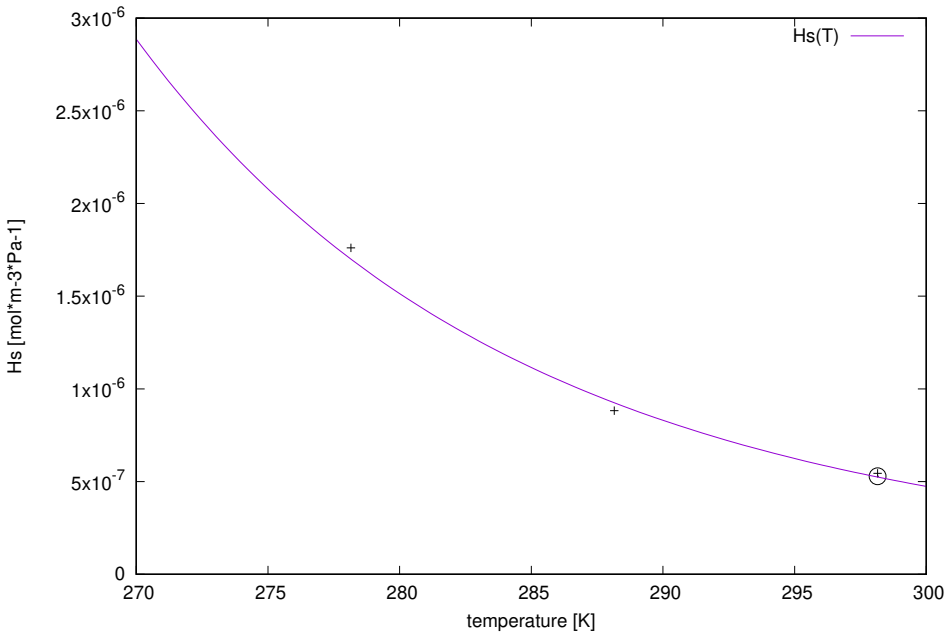

ref = 2993; chem = 10:2 FTO; casrn = 30389-25-4; r2 = 0.98684

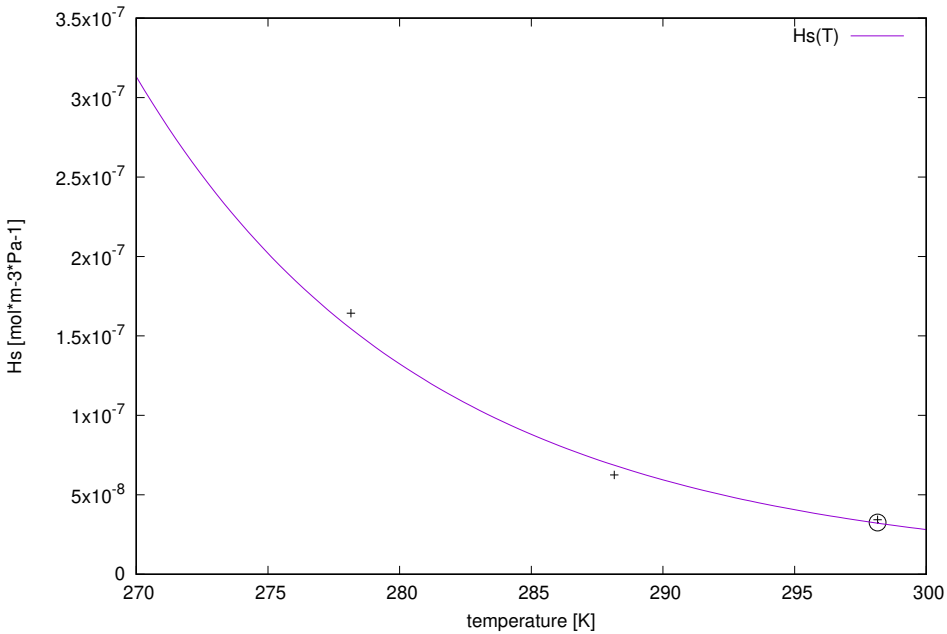

ref = 2993; chem = 6:2 FTOH; casrn = 647-42-7; r2 = 0.99613

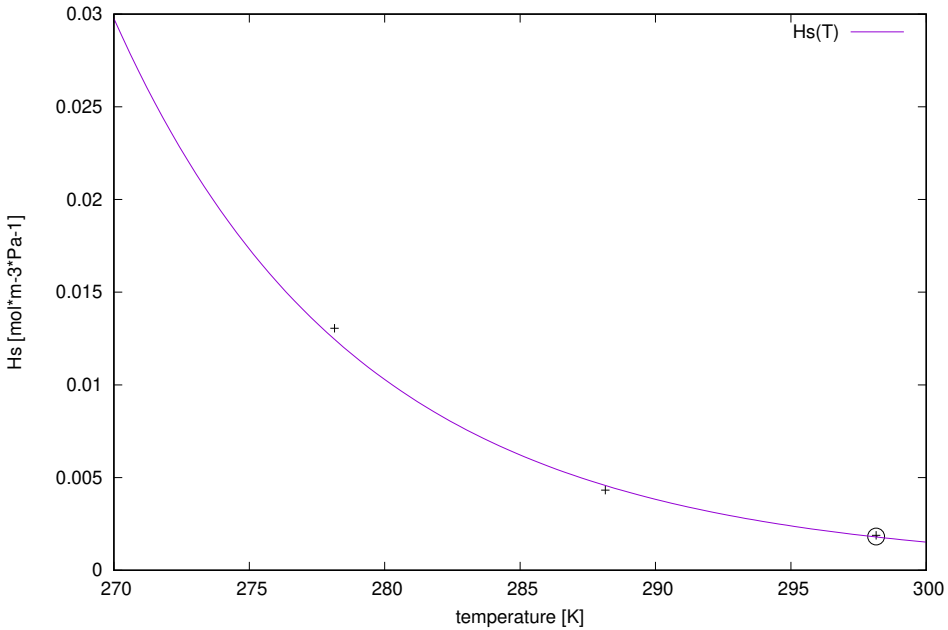



ref = 2993; chem = 8:2 FTOH; casrn = 678-39-7; r2 = 0.99325

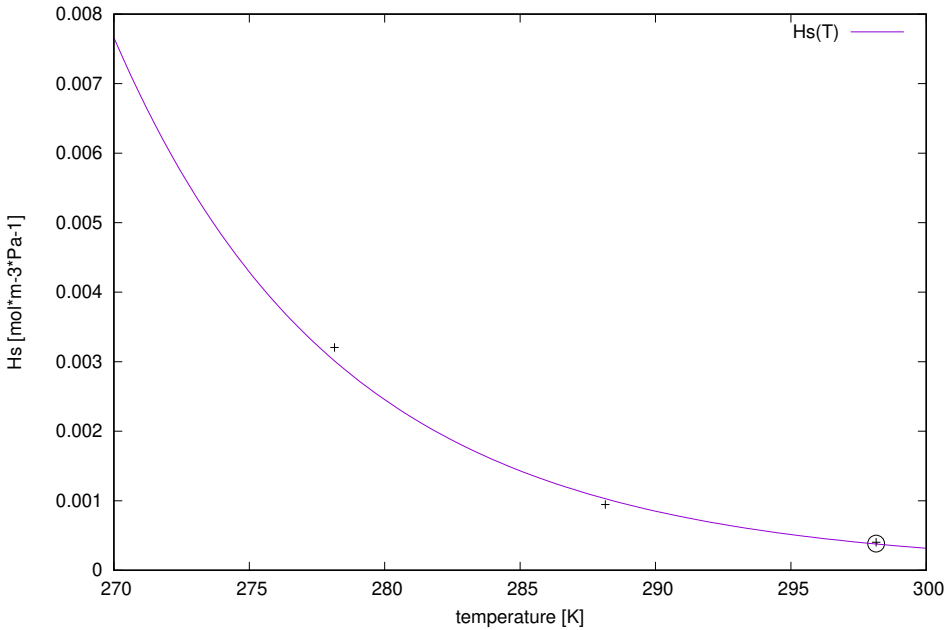

ref = 2993; chem = 10:2 FTOH; casrn = 865-86-1; r2 = 0.99102

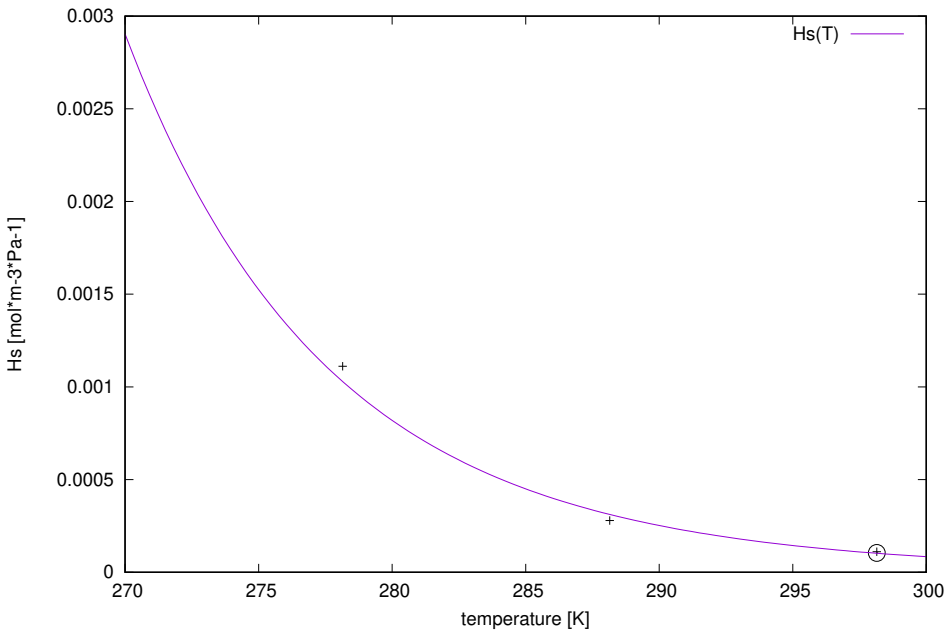

ref = 2996; chem = methylbenzene; casrn = 108-88-3; r2 = 0.99742

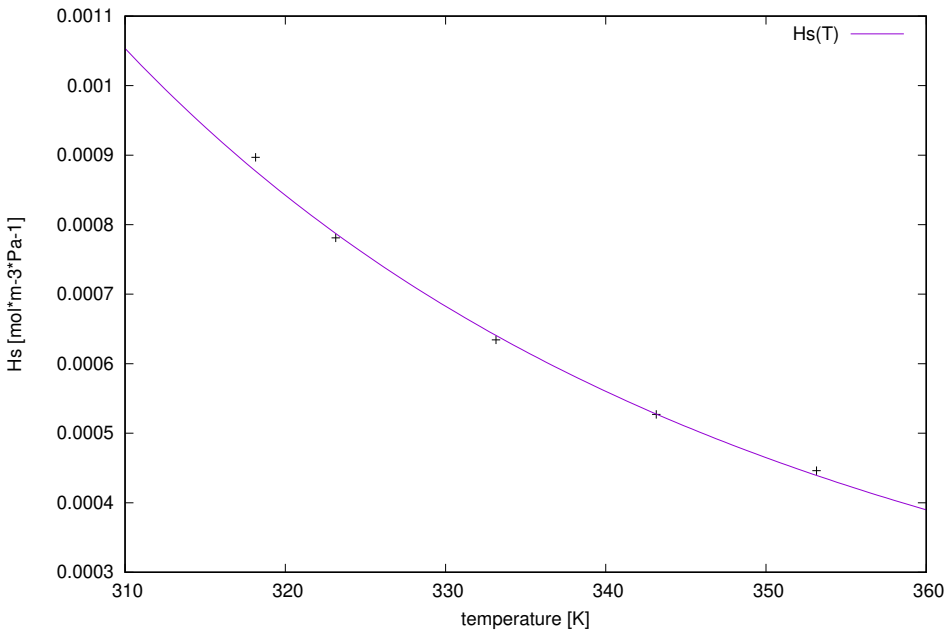

ref = 2996; chem = chlorobenzene; casrn = 108-90-7; r2 = 0.99780

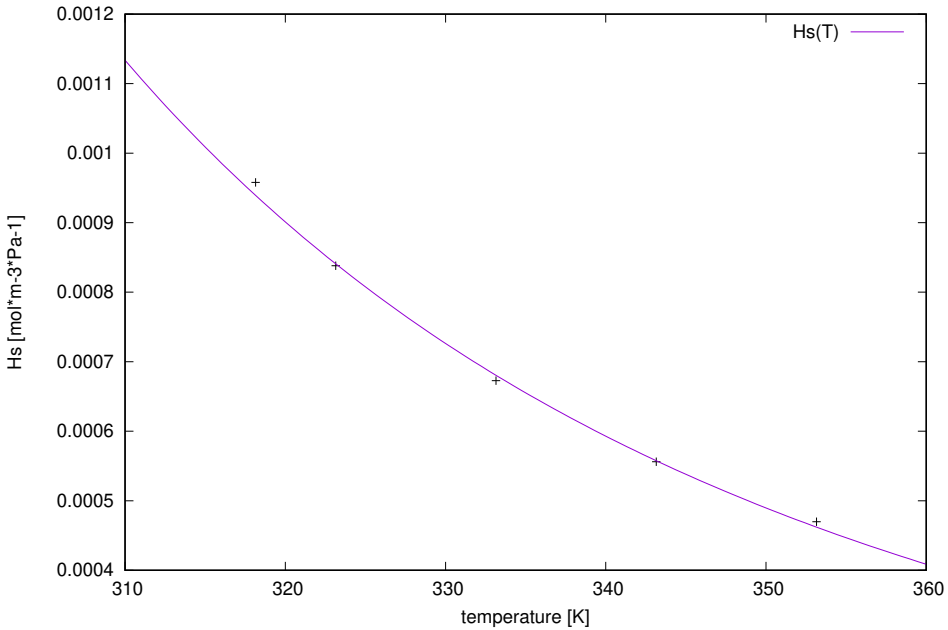

ref = 2996; chem = 4:2 FTOH; casrn = 2043-47-2; r2 = 0.99642

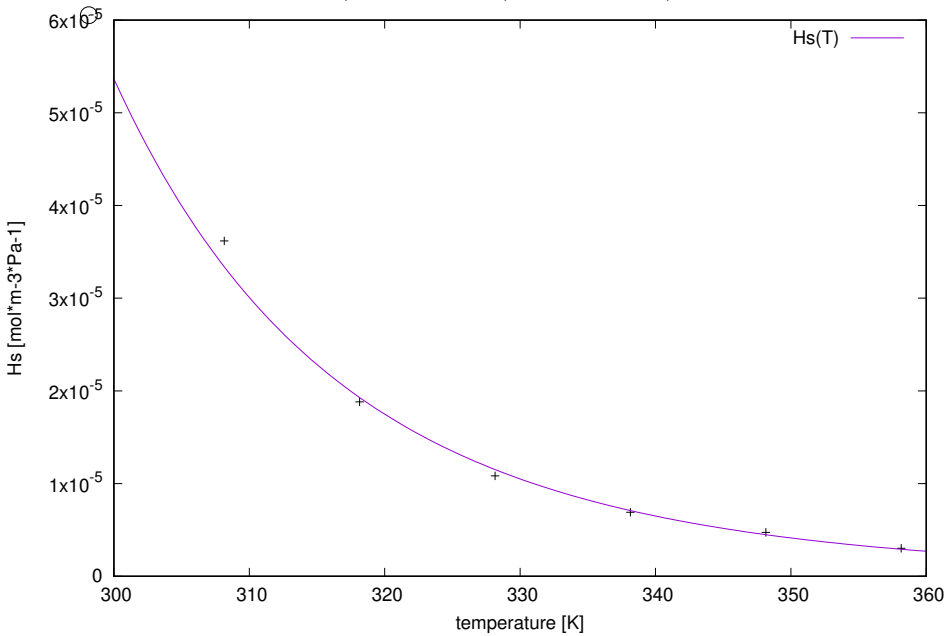

ref = 2996; chem = 6:2 FTOH; casrn = 647-42-7; r2 = 0.99799

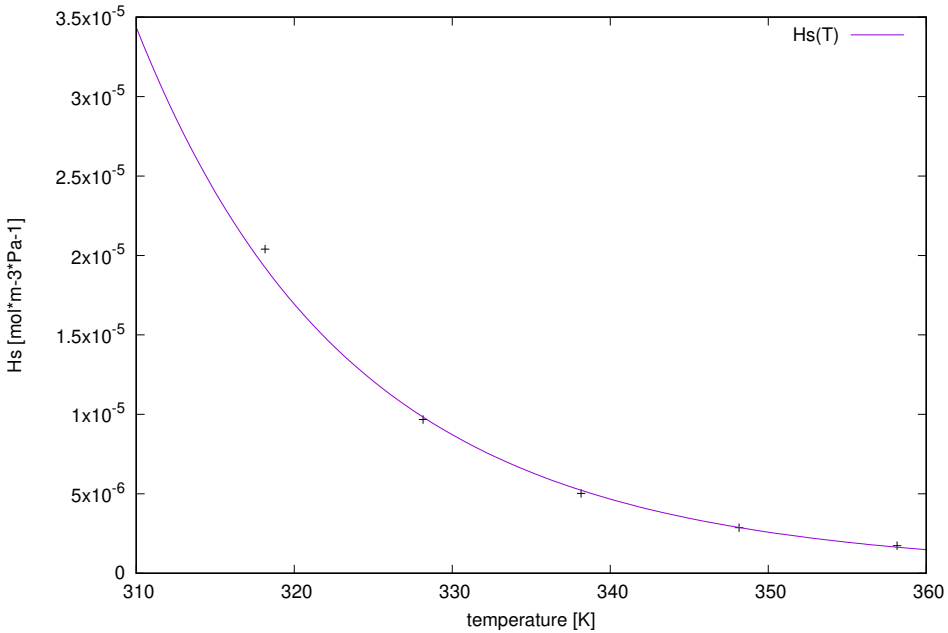

ref = 2996; chem = 8:2 FTOH; casrn = 678-39-7; r2 = 0.99944

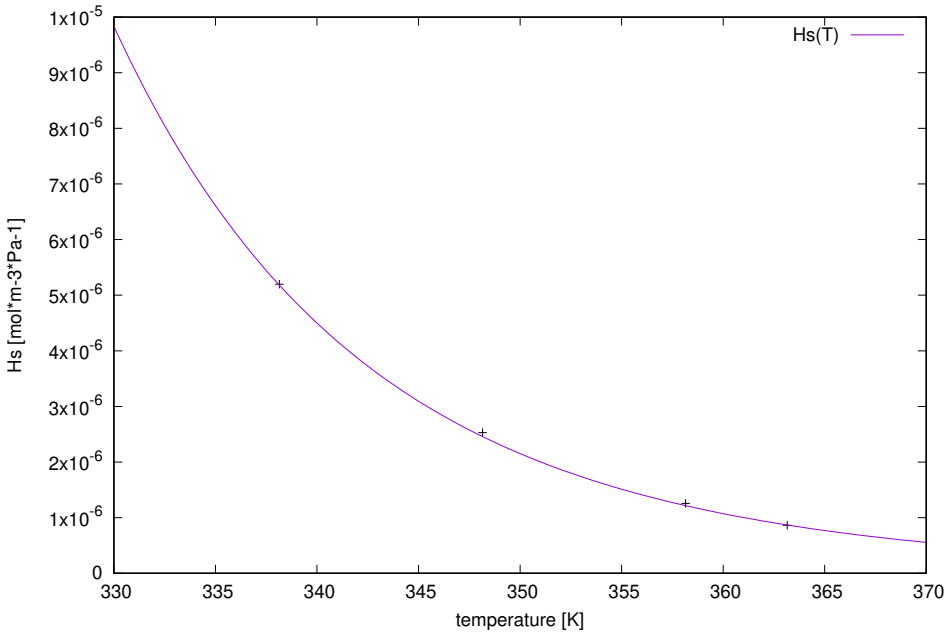

ref = 2996; chem = benzene; casrn = 71-43-2; r2 = 0.99783

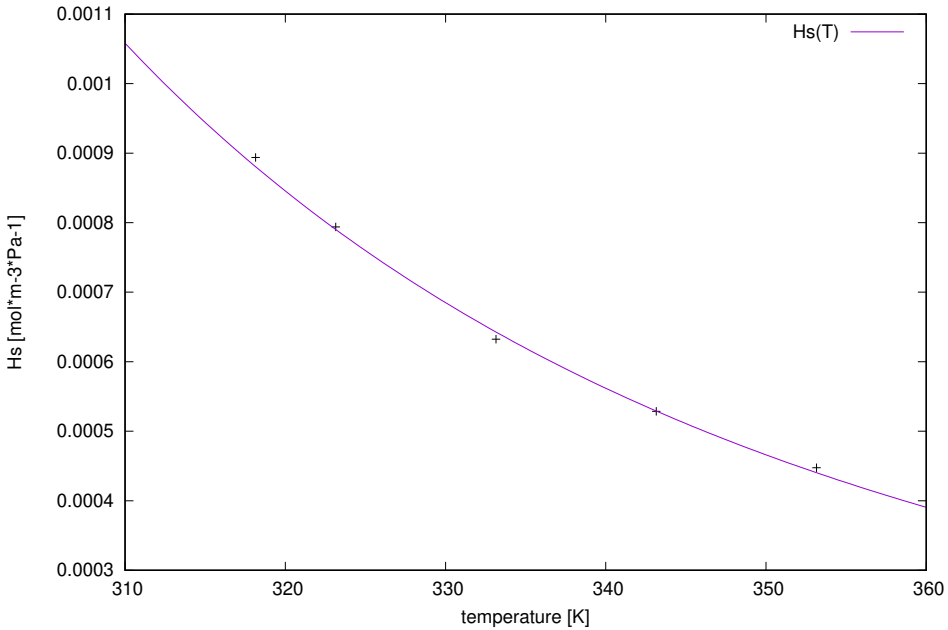



ref = 2997; chem = 1-hexanol; casrn = 111-27-3; r2 = 0.99924

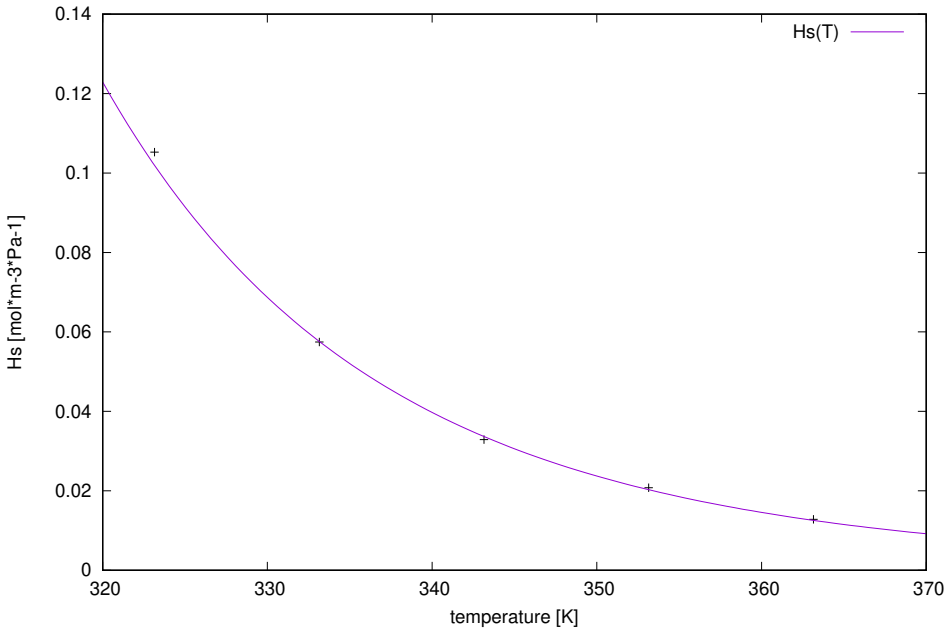

ref = 2997; chem = 1-heptanol; casrn = 111-70-6; r2 = 0.99967

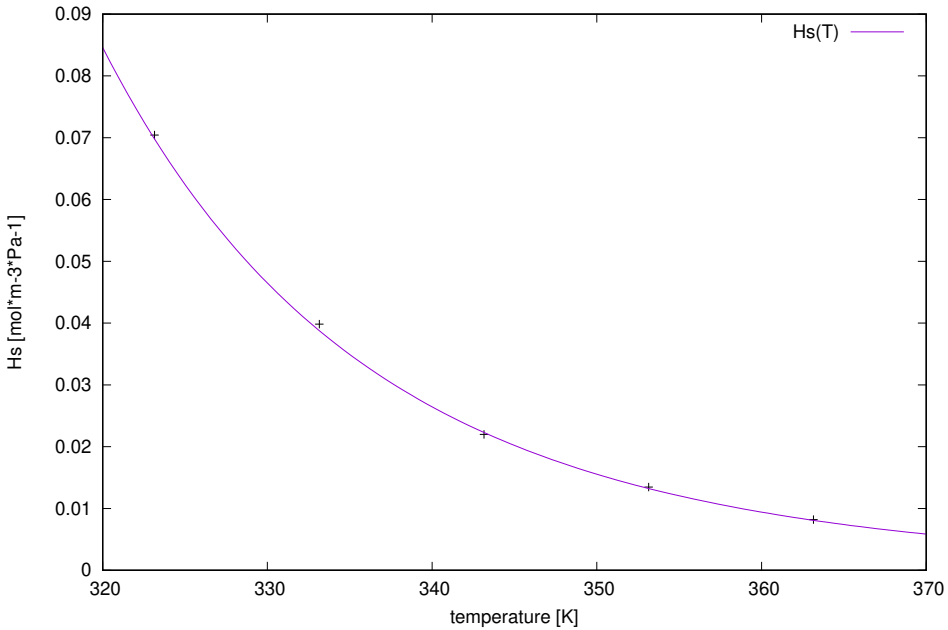

ref = 2997; chem = 1-octanol; casrn = 111-87-5; r2 = 0.99628

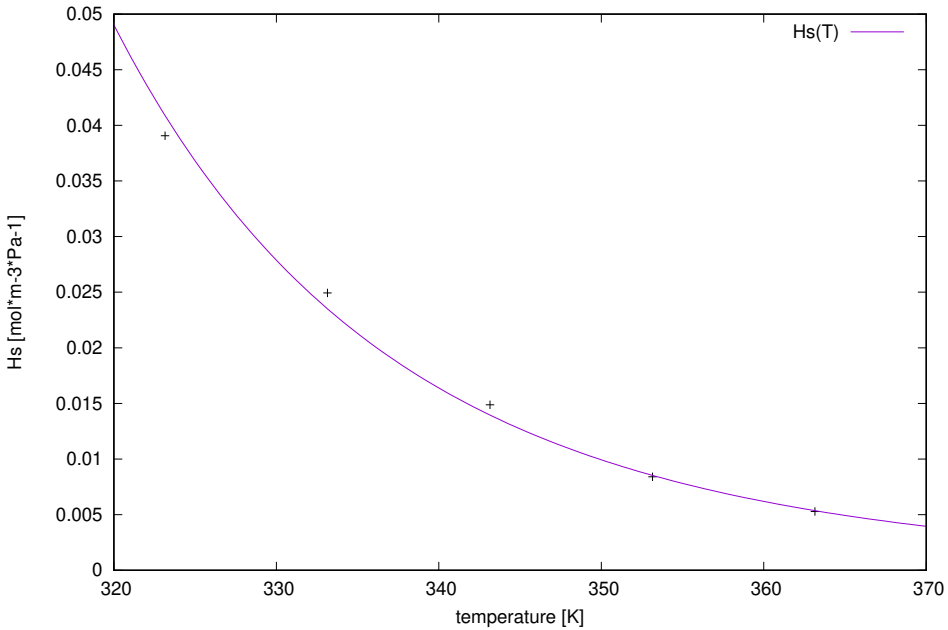

ref = 2997; chem = 1-decanol; casrn = 112-30-1; r2 = 0.99638

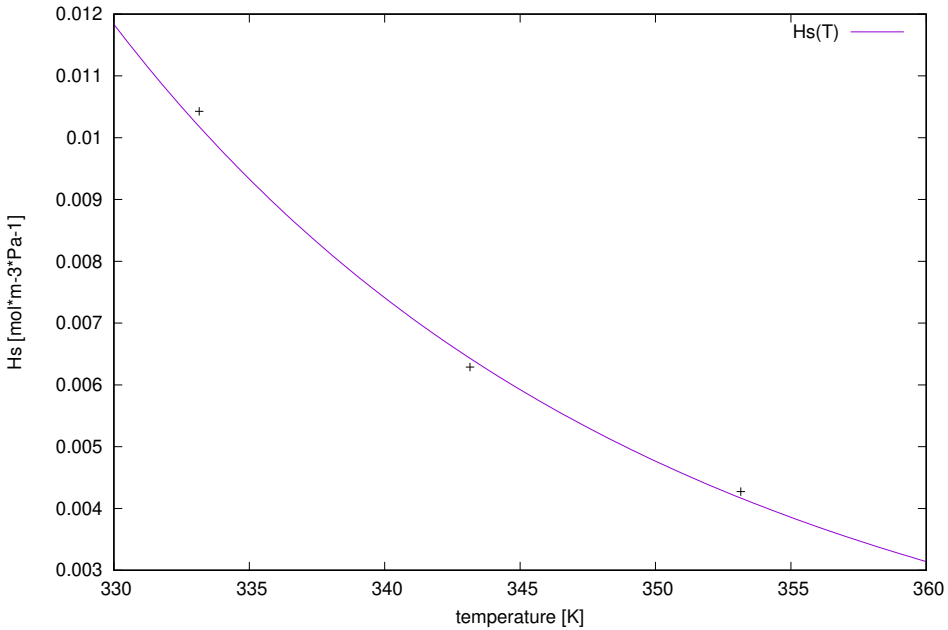

ref = 2997; chem = 1-nonanol; casrn = 143-08-8; r2 = 0.98600

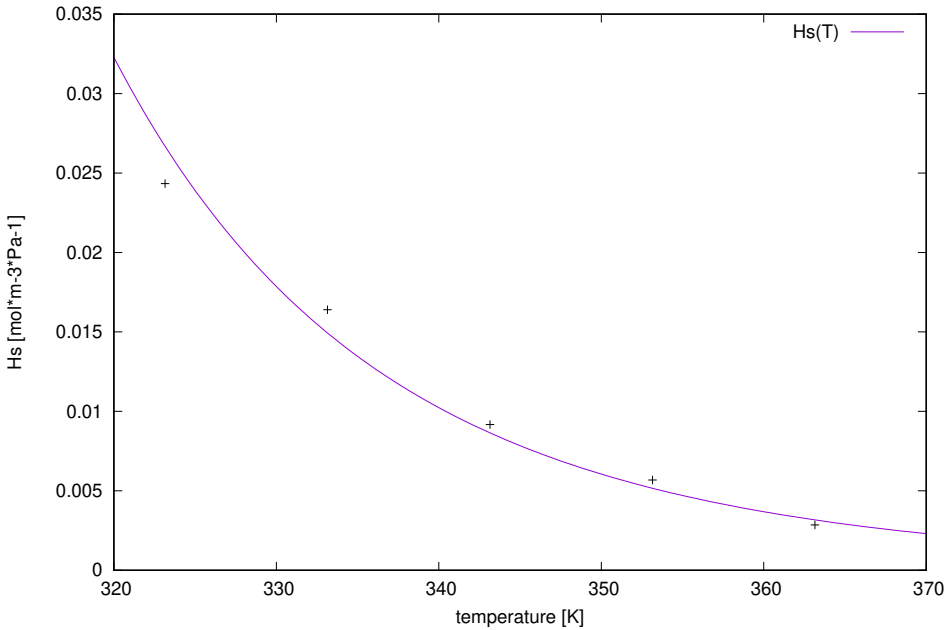

ref = 2997; chem = 1-butanol; casrn = 71-36-3; r2 = 0.99097

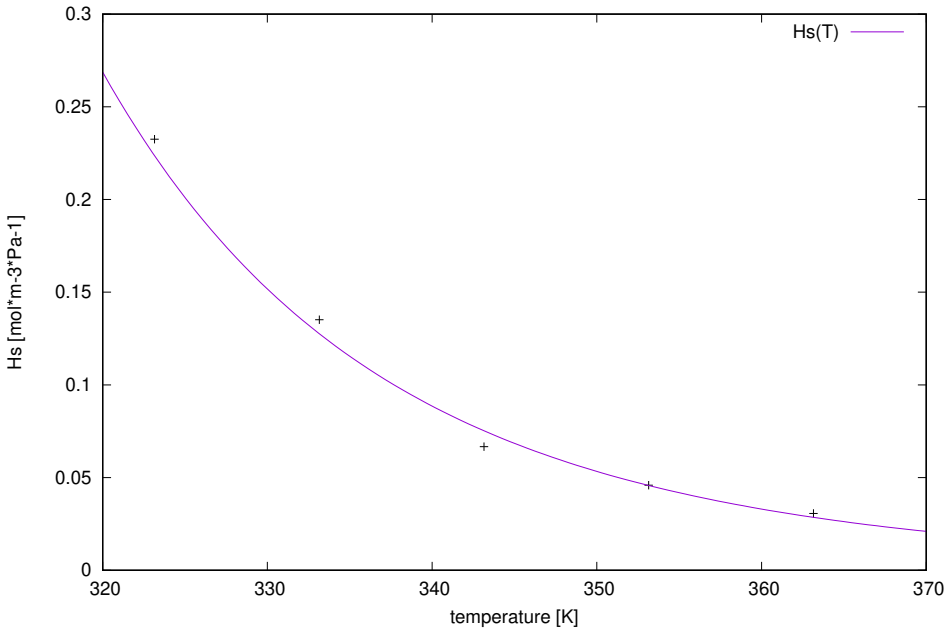

ref = 2997; chem = 1-pentanol; casrn = 71-41-0; r2 = 0.99944

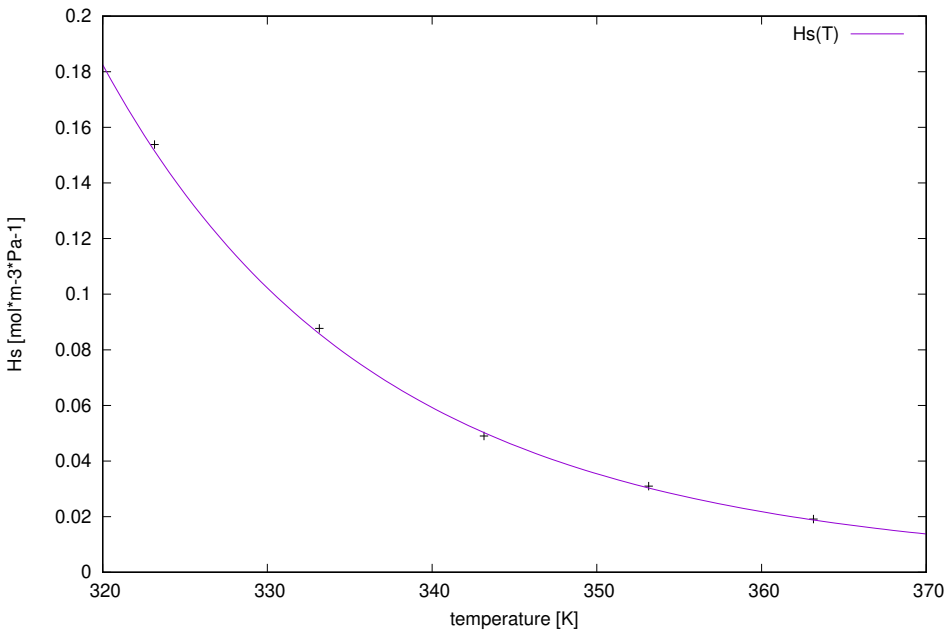

ref = 2999; chem = 1-hexanol; casrn = 111-27-3; r2 = 0.99760

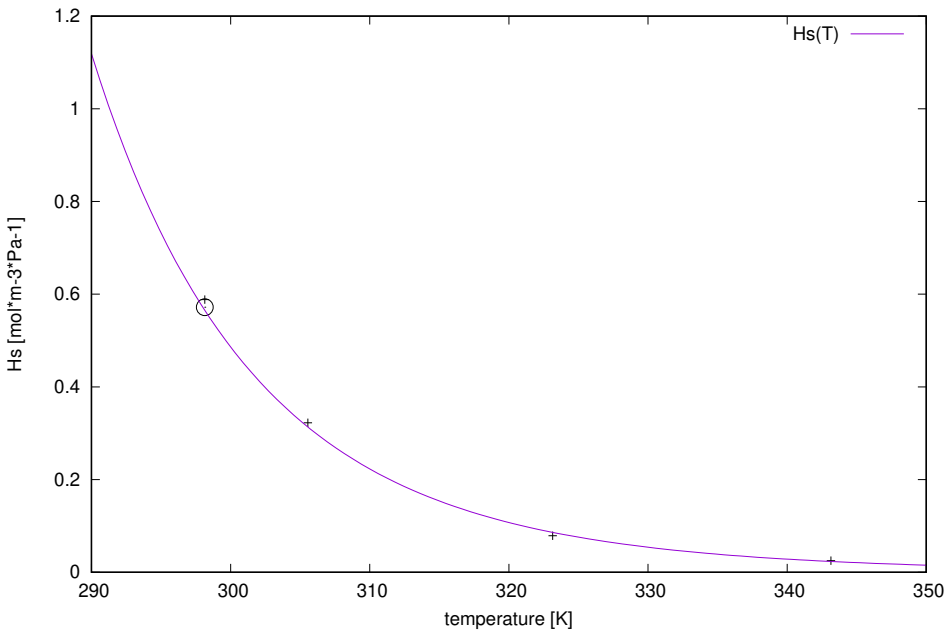



ref = 2999; chem = 1-heptanol; casrn = 111-70-6; r2 = 0.99721

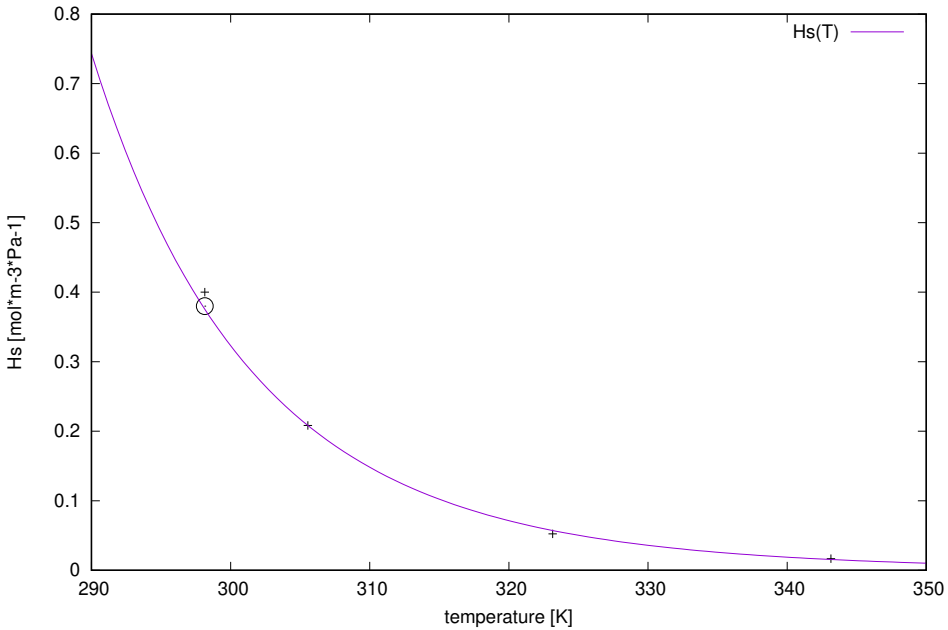

ref = 2999; chem = 1-octanol; casrn = 111-87-5; r2 = 0.99670

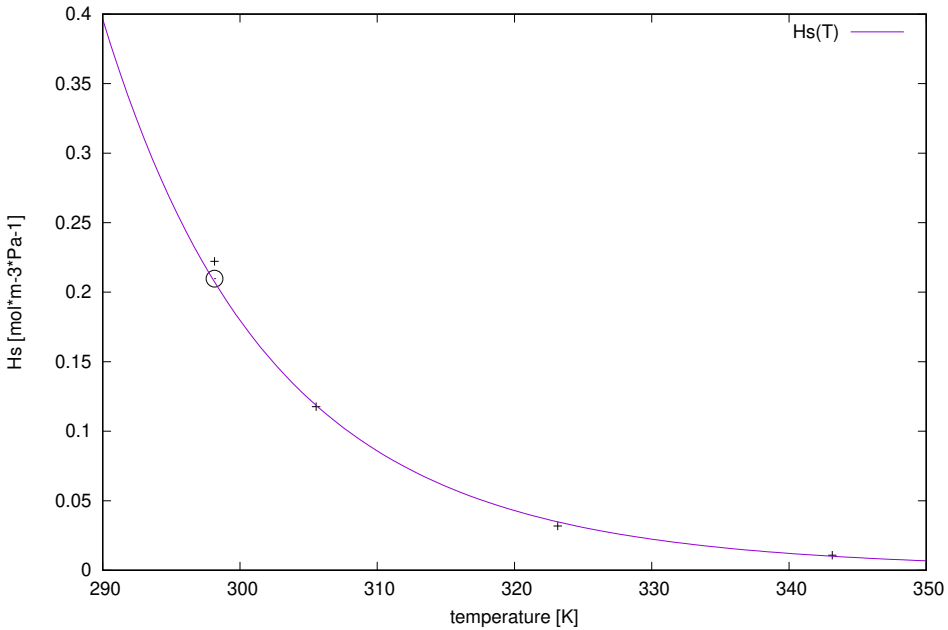

ref = 2999; chem = 1-decanol; casrn = 112-30-1; r2 = 0.98252

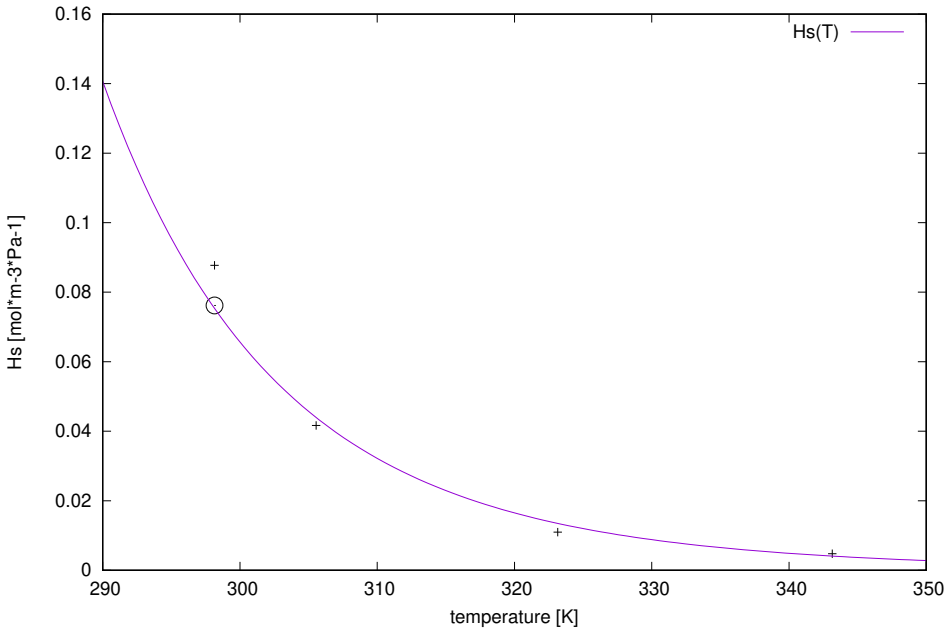

ref = 2999; chem = 1-nonanol; casrn = 143-08-8; r2 = 0.99236

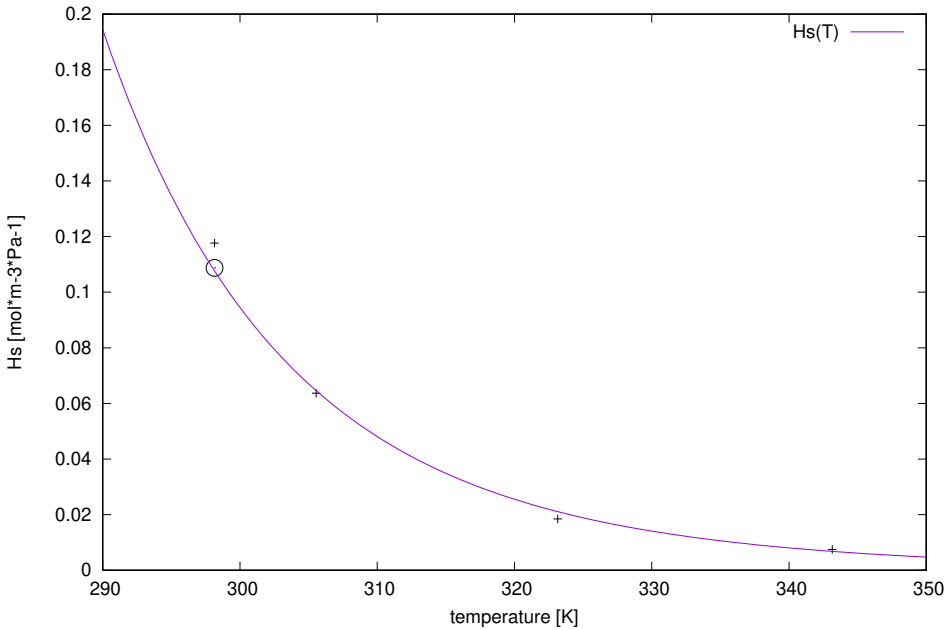

ref = 2999; chem = 1-butanol; casrn = 71-36-3; r2 = 0.99883

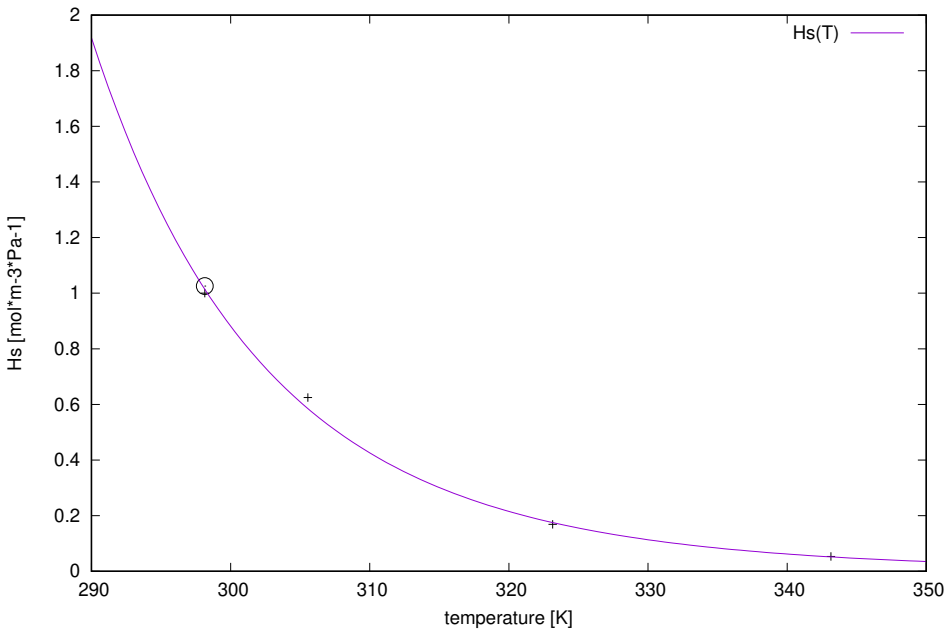

ref = 2999; chem = 1-pentanol; casrn = 71-41-0; r2 = 0.99815

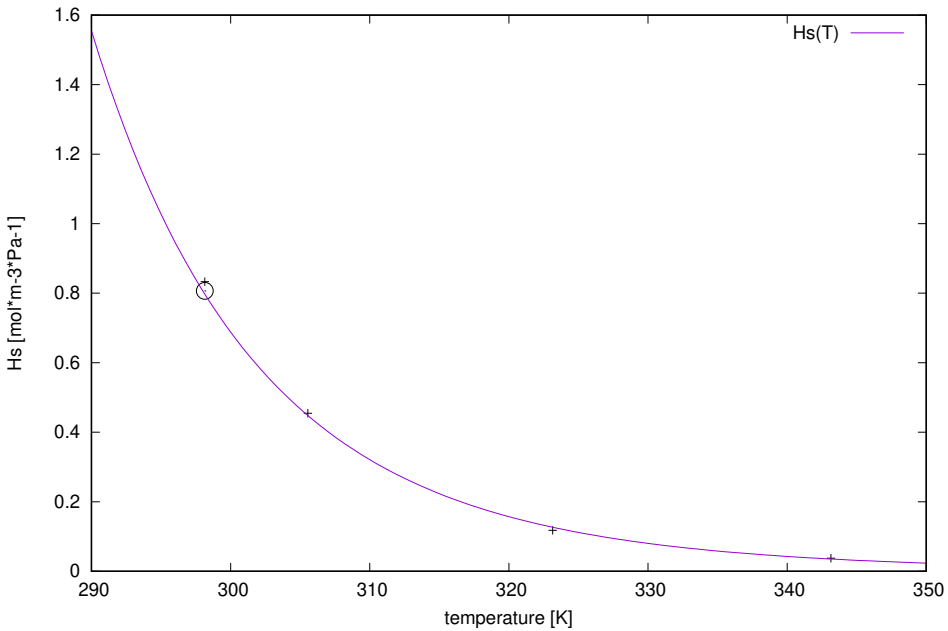

ref = 3006; chem = fluoranthene; casrn = 206-44-0; r2 = 0.99828

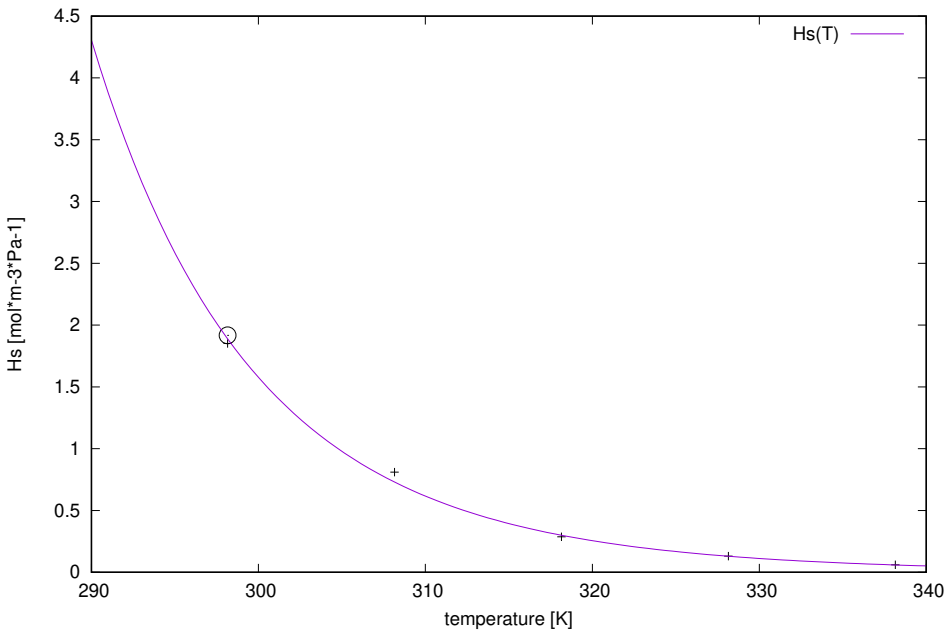

ref = 3006; chem = 1,2,3,4-dibenzanthracene DBA(a,c); casrn = 215-58-7; r2 = 0.97916

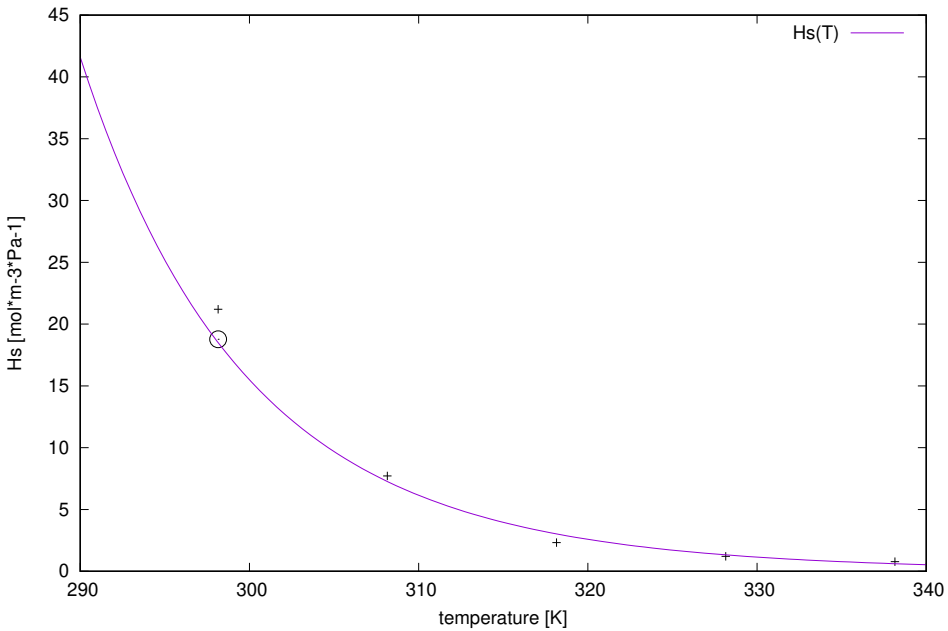



ref = 3006; chem = 1,2,5,6-dibenzanthracene DBA(a,h); casrn = 53-70-3; r2 = 0.99829

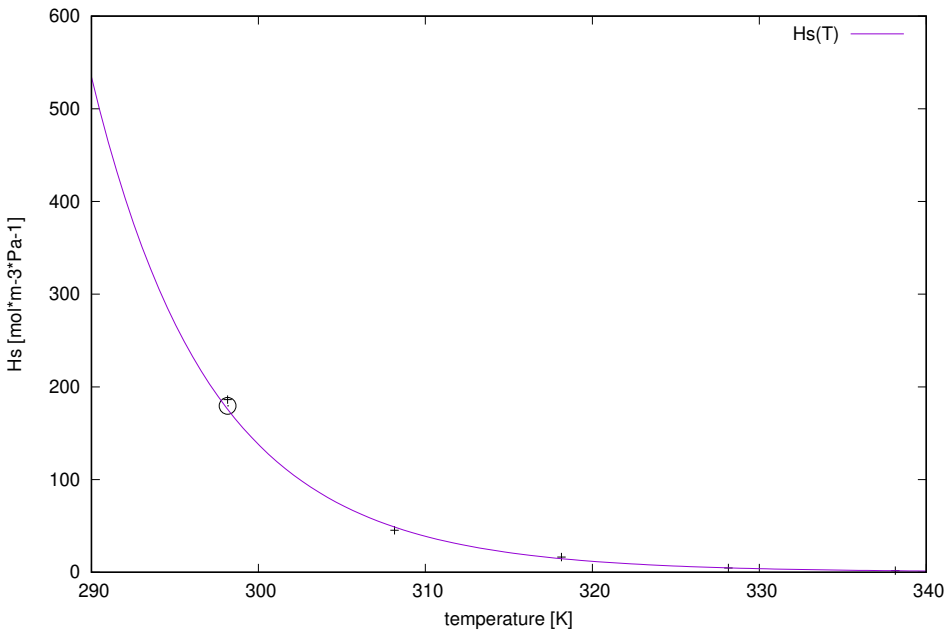

ref = 3008; chem = limonene; casrn = 138-86-3; r2 = 0.99753

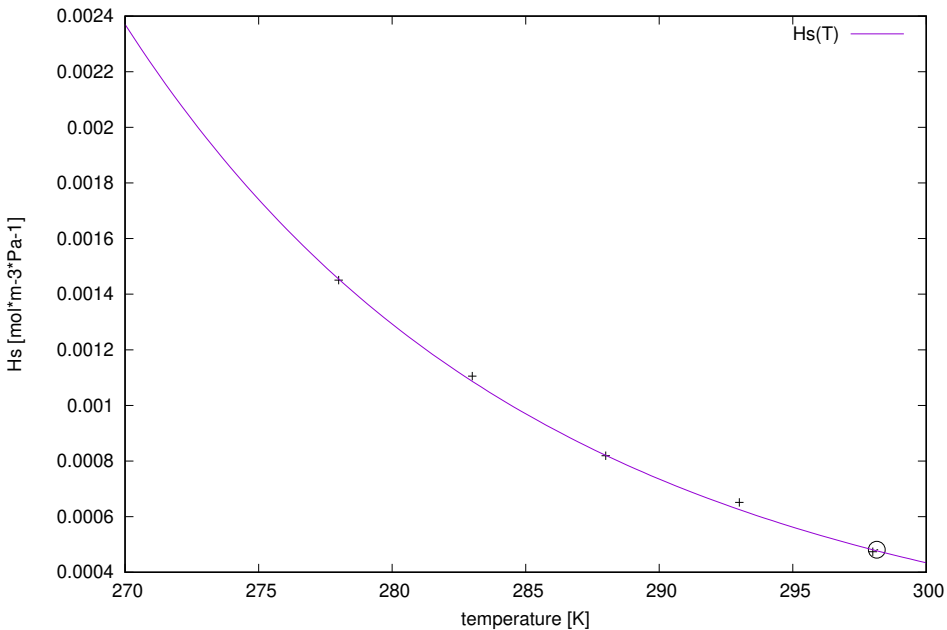

ref = 3008; chem = linalool; casrn = 78-70-6; r2 = 0.99286

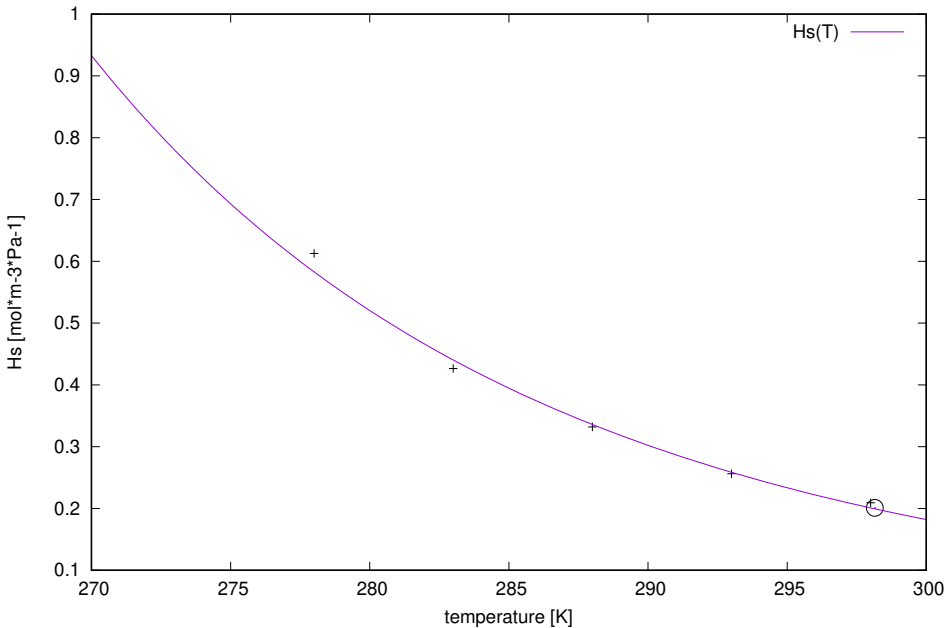

ref = 3008; chem = isoprene; casrn = 78-79-5; r2 = 0.99402

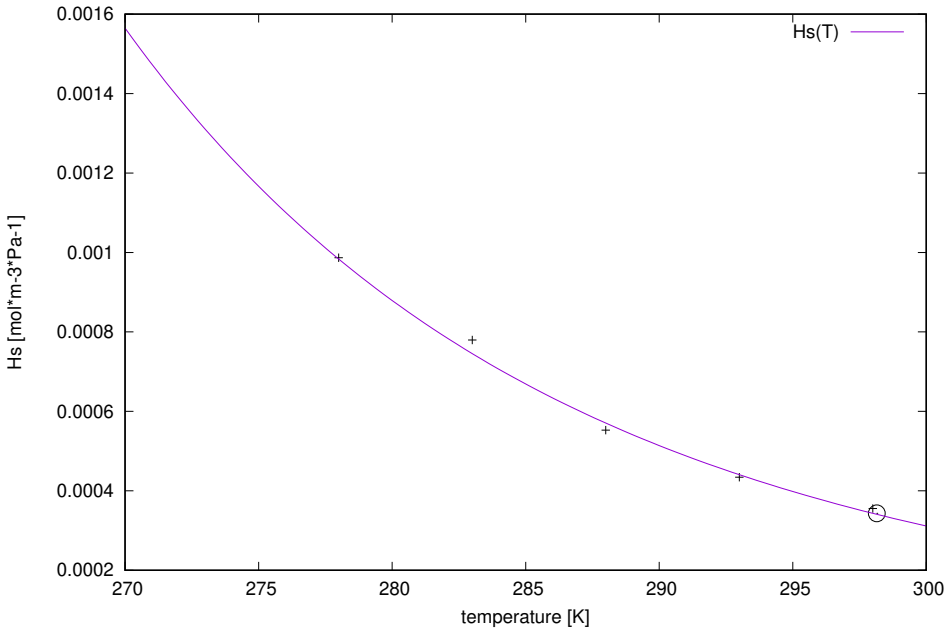

ref = 3008; chem = alpha-pinene; casrn = 80-56-8; r2 = 0.97562

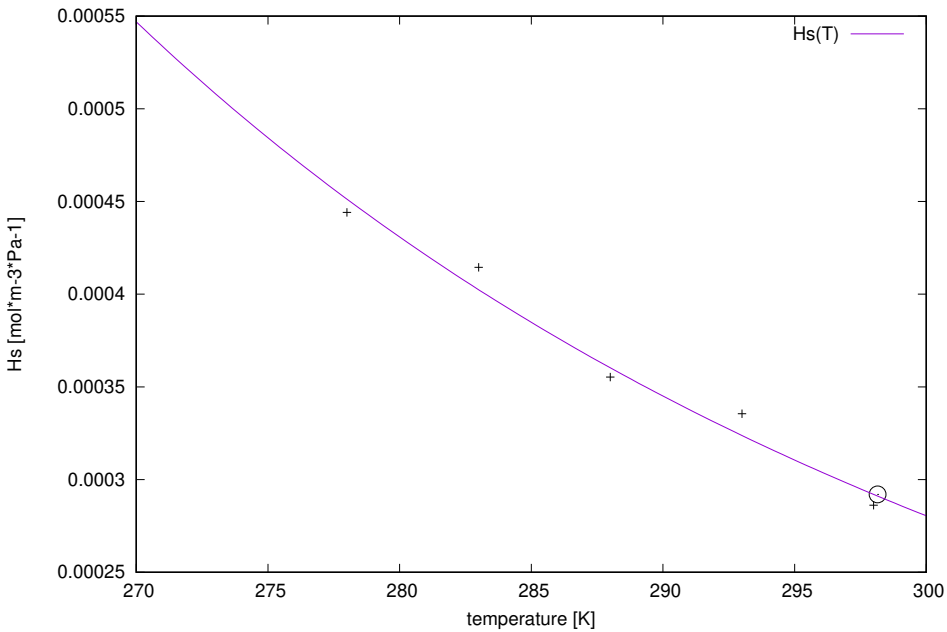

ref = 3013; chem = 4-2FTOH; casrn = 2043-47-2; r2 = 0.98533

Hs [mol\*m<sup>-3</sup>\*Pa<sup>-1</sup>]

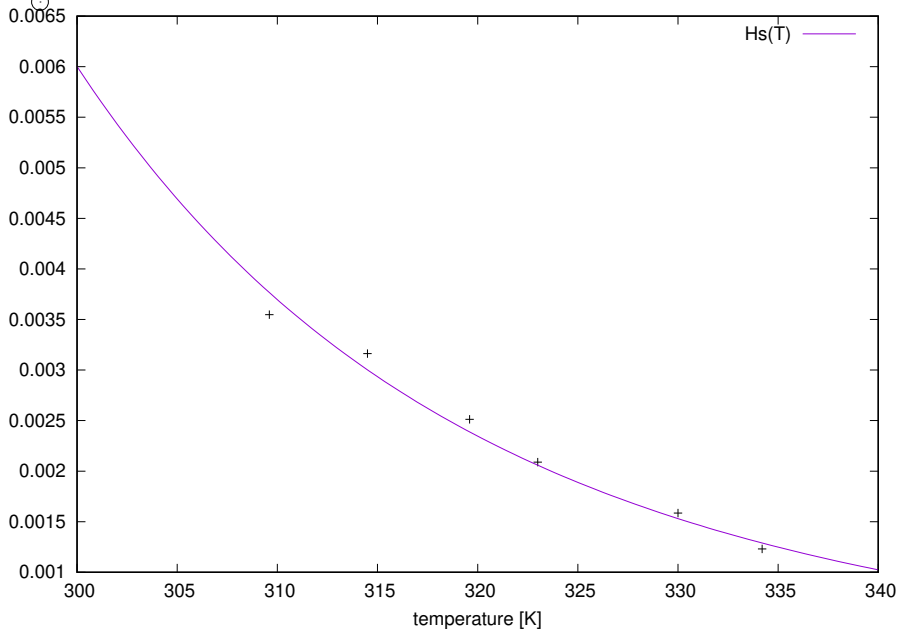

ref = 3013; chem = 6-2FTOH; casrn = 647-42-7; r2 = 0.94359

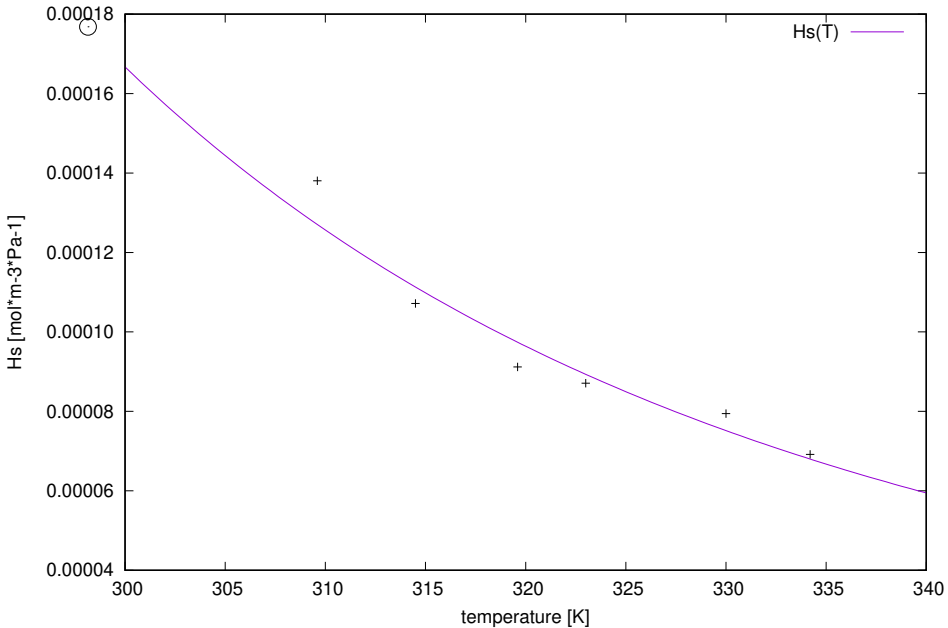

ref = 3013; chem = 8-2FTOH; casrn = 678-39-7; r2 = 0.98955

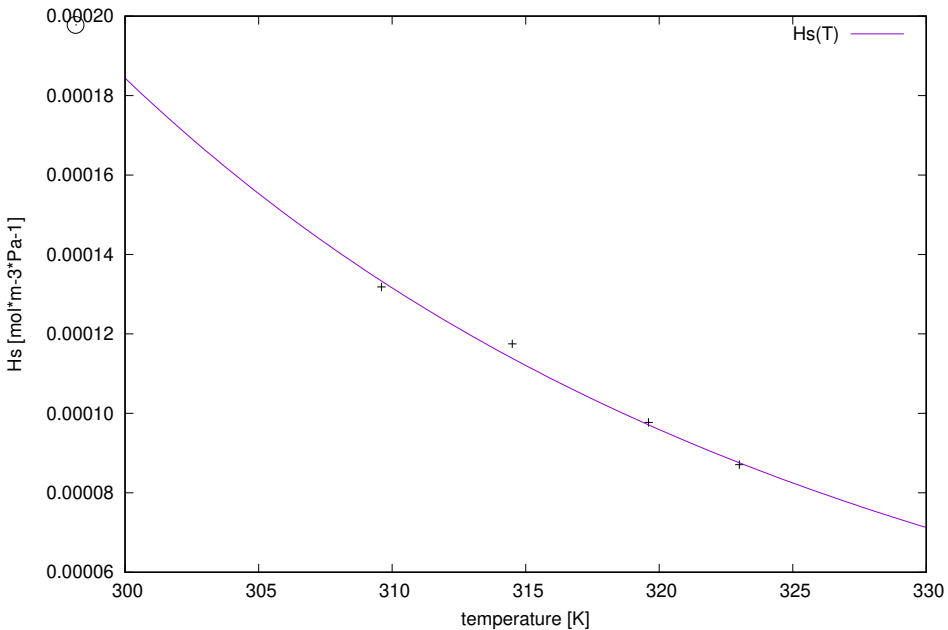



ref = 3013; chem = 10-2FTOH; casrn = 865-86-1; r2 = 0.94465

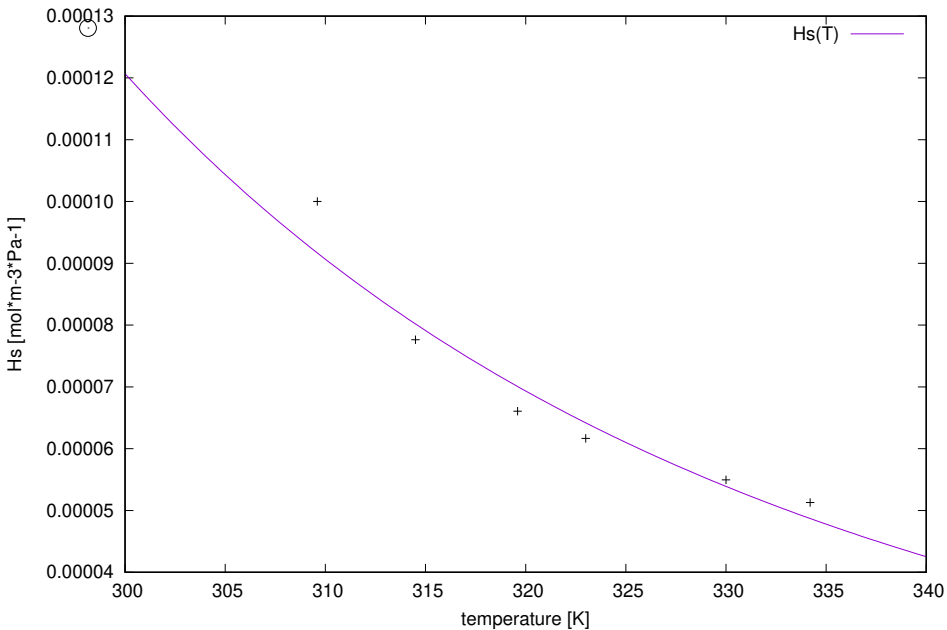

ref = 3015; chem = silicic acid; casrn = 10193-36-9; r2 = 0.99903

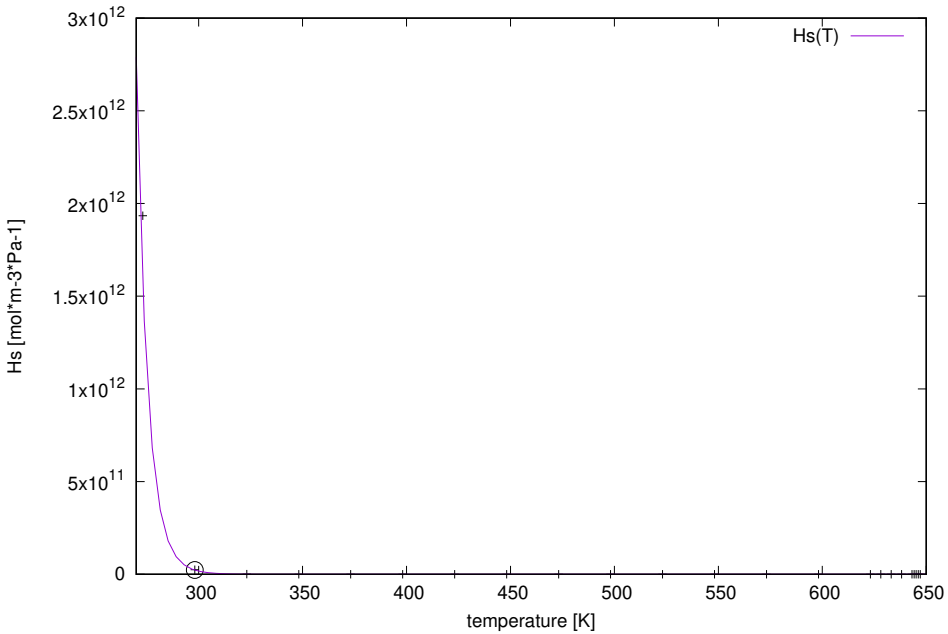

ref = 3026; chem = hydrogen; casrn = 1333-74-0; r2 = 0.99635

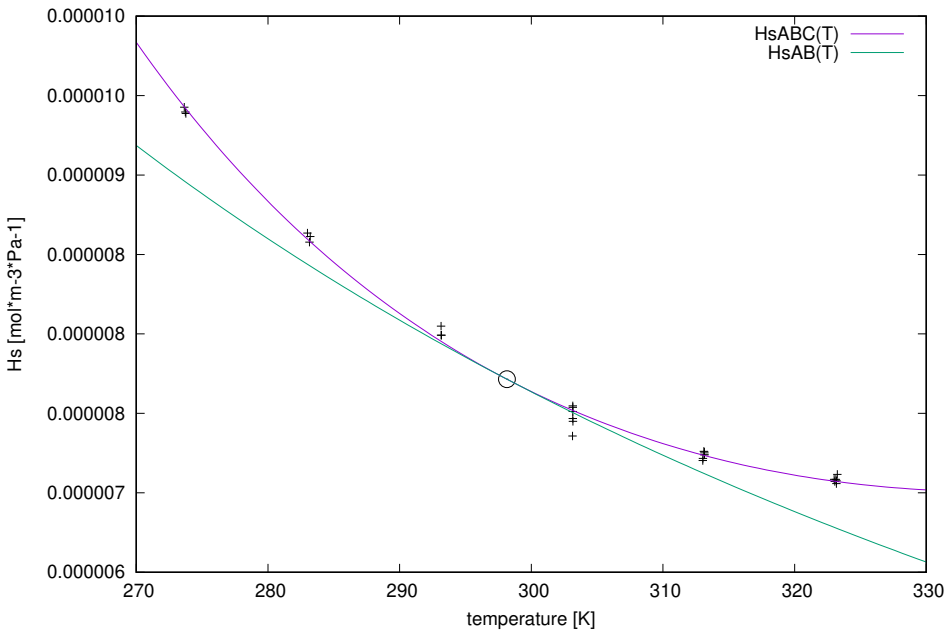

ref = 3027; chem = nitrogen; casrn = 7727-37-9; r2 = 0.99969

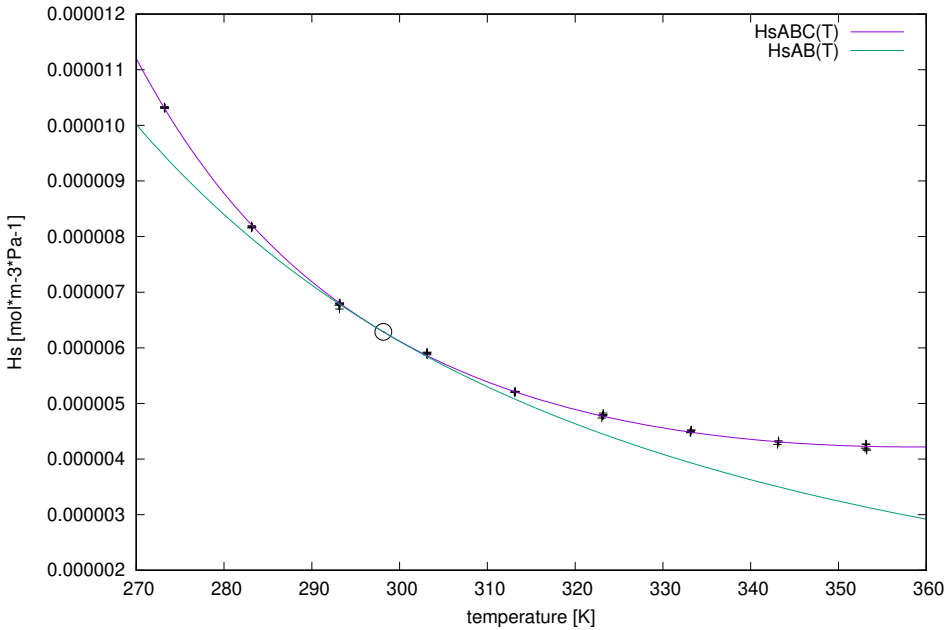

ref = 3027; chem = oxygen; casrn = 7782-44-7; r2 = 0.99919

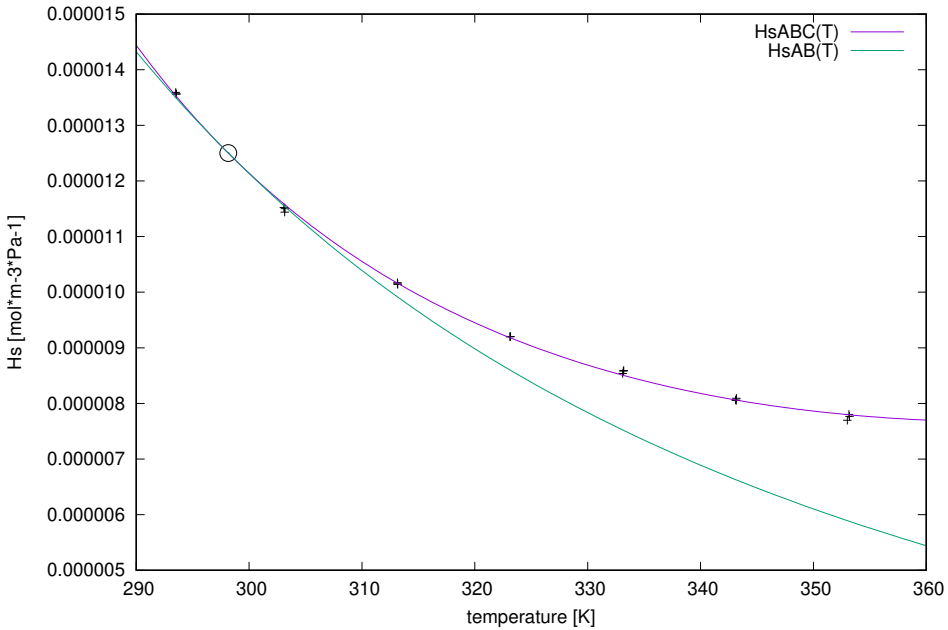

ref = 3033; chem = phosphorus trihydride; casrn = 7803-51-2; r2 = 0.99757

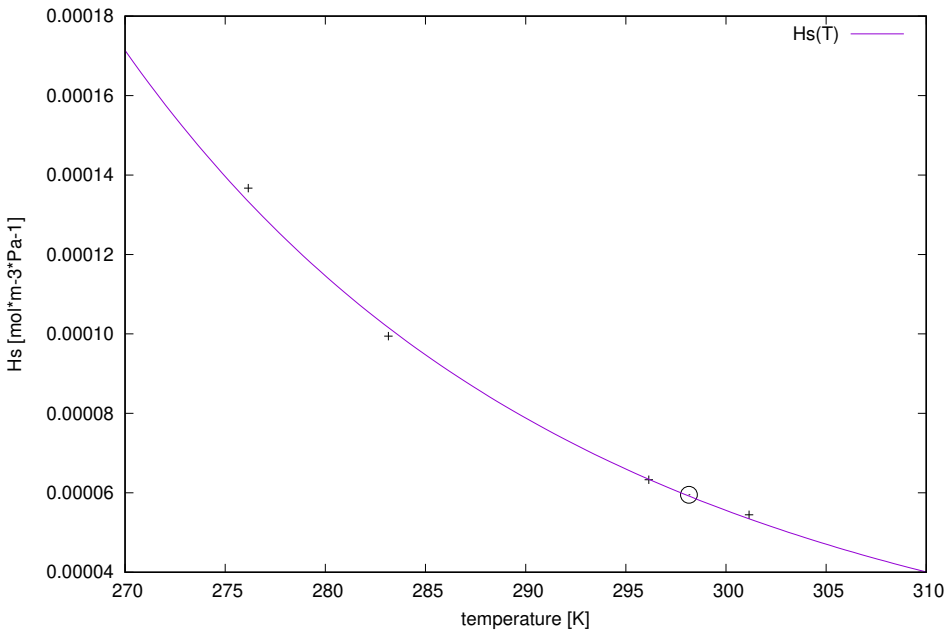

ref = 3070; chem = chloromethylmercury; casrn = 115-09-3; r2 = 0.81090

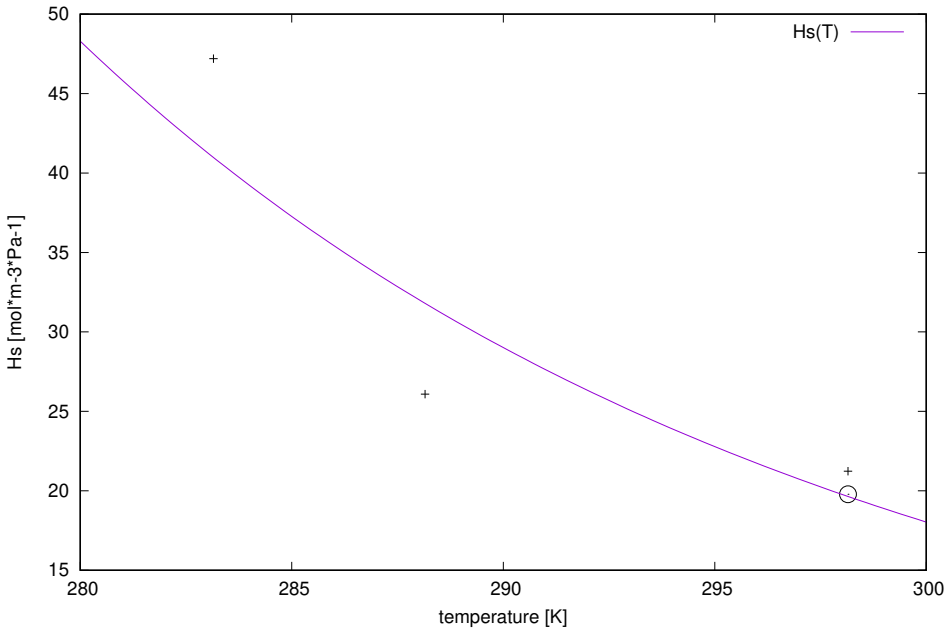

ref = 3070; chem = mercury dihydroxide; casrn = 12135-13-6; r2 = 1.00000





ref = 3070; chem = dimethylmercury; casrn = 593-74-8; r2 = 1.00000



ref = 3070; chem = mercury dichloride; casrn = 7487-94-7; r2 = 1.00000



ref = 3077; chem = tetraethyllead; casrn = 78-00-2; r2 = 0.97076

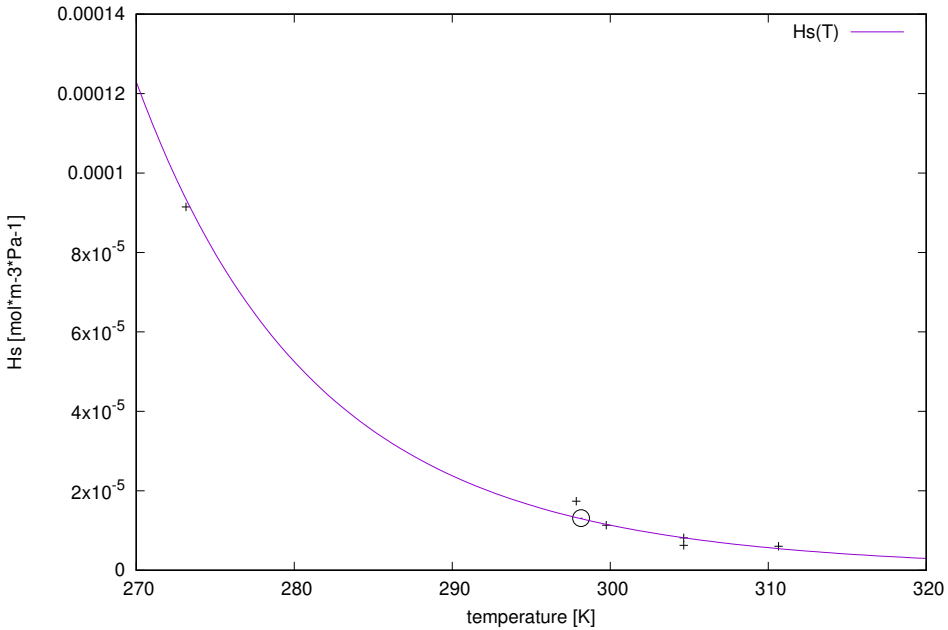

ref = 3080; chem = N-ethyl-N-nitroso-ethanamine; casrn = 55-18-5; r2 = 0.99494

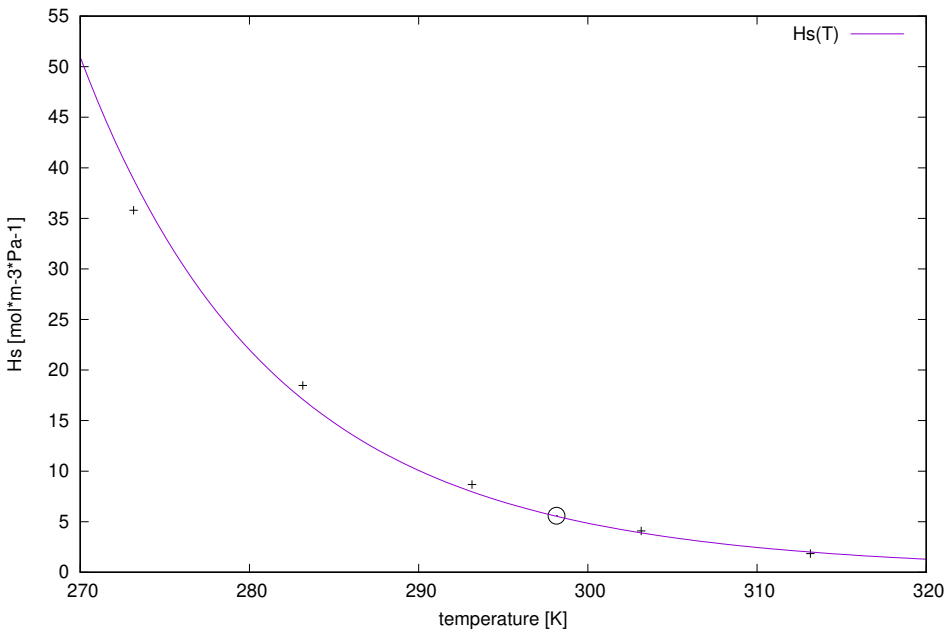

ref = 3080; chem = N-nitrosodimethylamine; casrn = 62-75-9; r2 = 0.98803

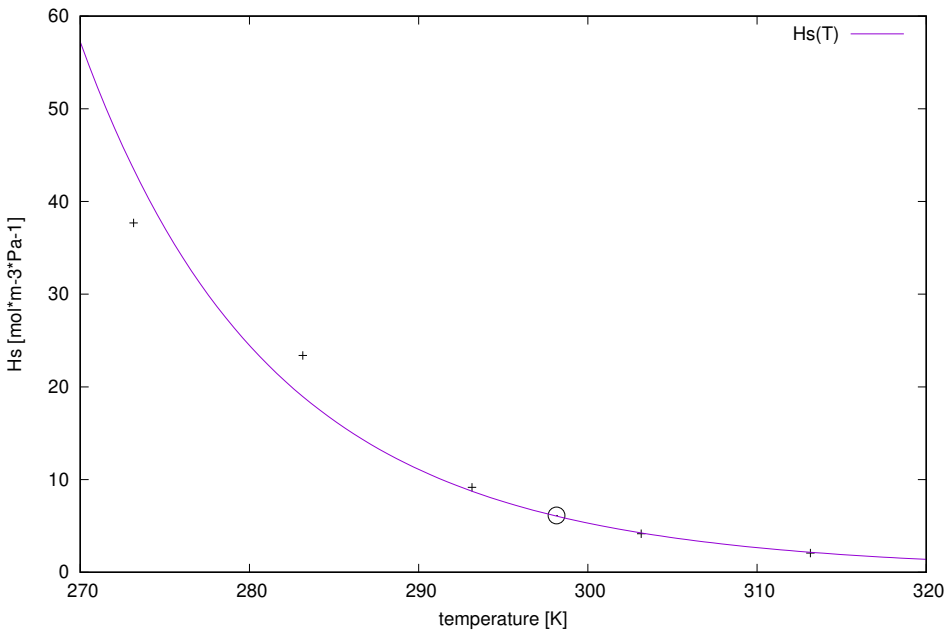

ref = 3080; chem = N-nitrosopyrrolidine; casrn = 930-55-2; r2 = 0.97372

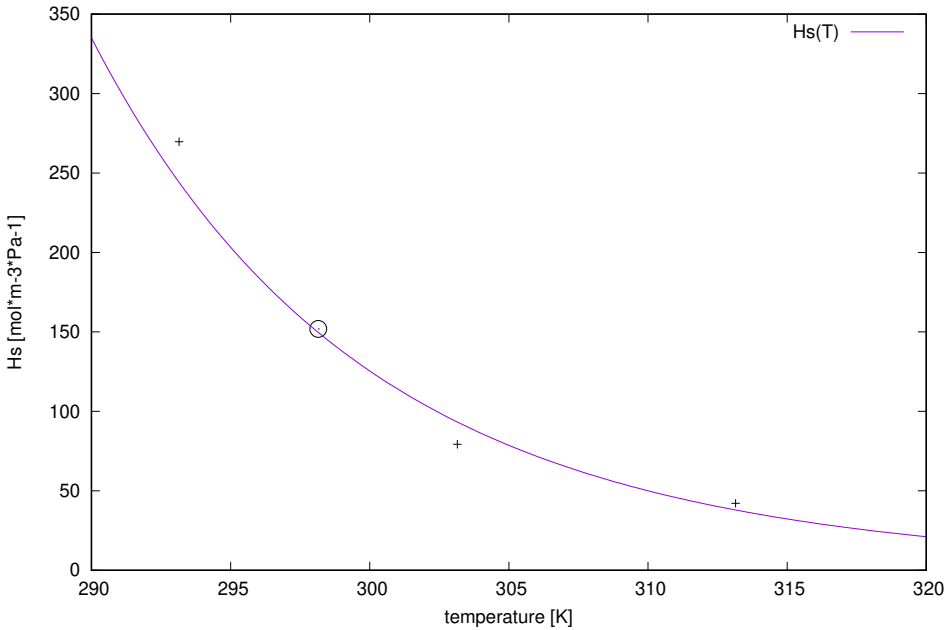

ref = 3086; chem = cis-1,3-dichloropropene; casrn = 10061-01-5; r2 = 0.99879

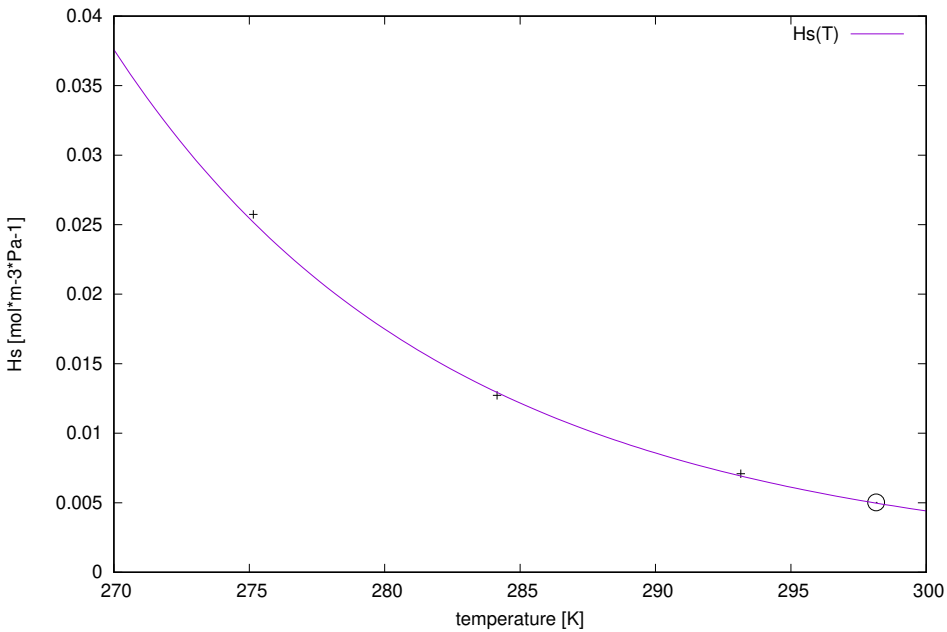

ref = 3086; chem = trans-1,3-dichloropropene; casrn = 10061-02-6; r2 = 0.99840

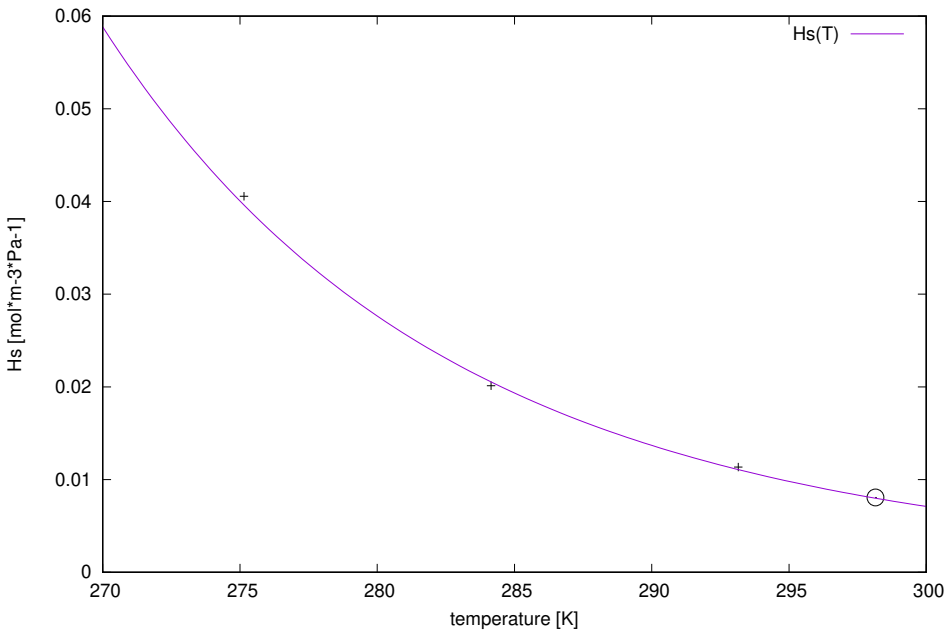



ref = 3100; chem = propyne; casrn = 74-99-7; r2 = 0.99961

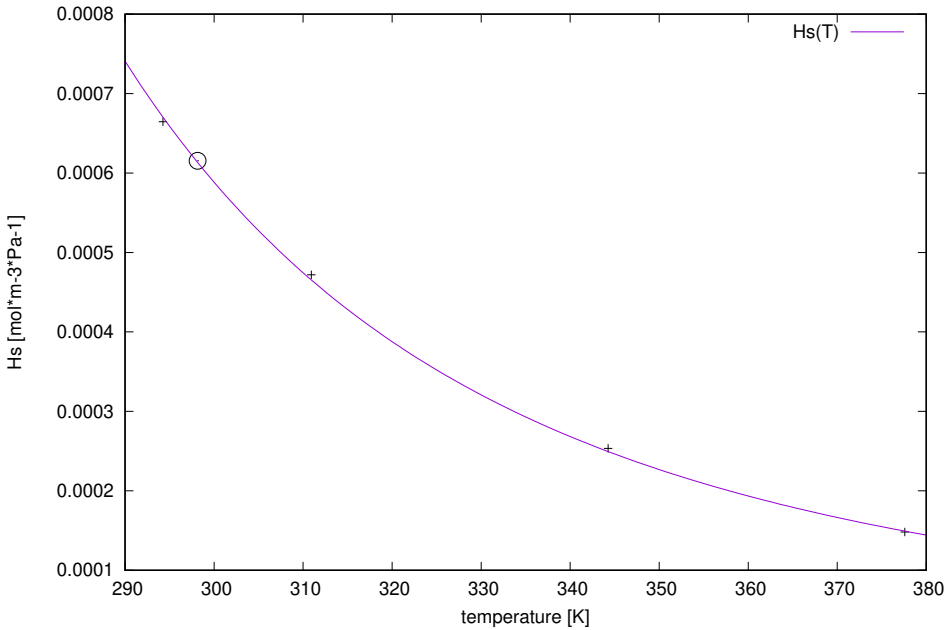

ref = 3111; chem = methanal; casrn = 50-00-0; r2 = 0.98854

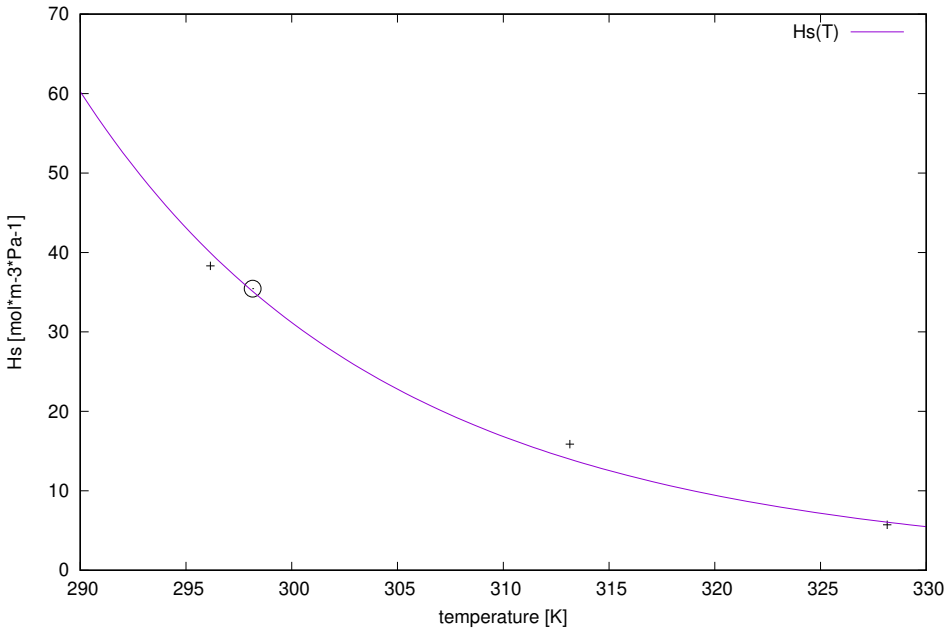

ref = 3112; chem = 2-pentanone; casrn = 107-87-9; r2 = 0.99959

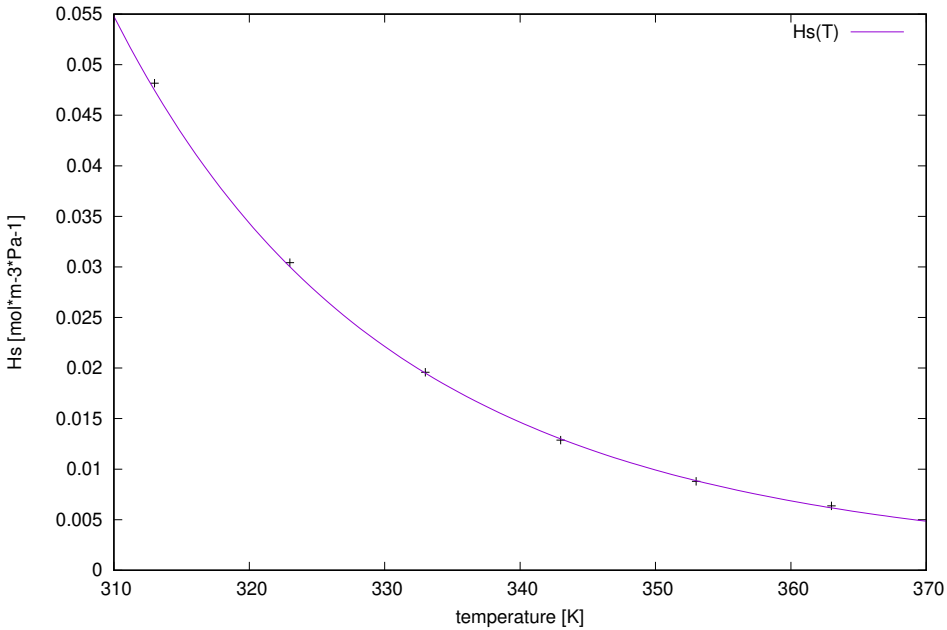

ref = 3112; chem = 2-heptanone; casrn = 110-43-0; r2 = 0.99762

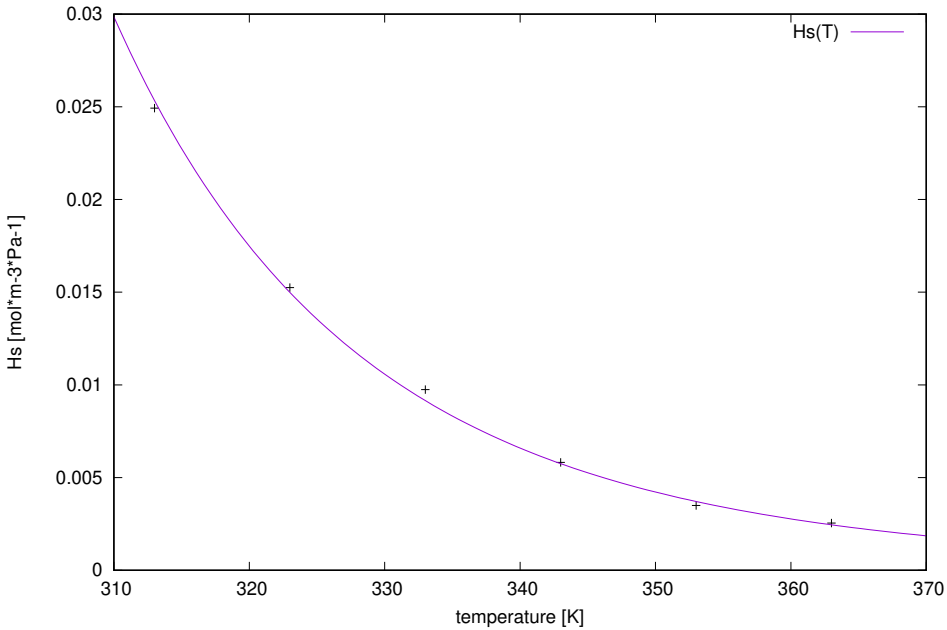

ref = 3112; chem = 1-hexanol; casrn = 111-27-3; r2 = 0.99861

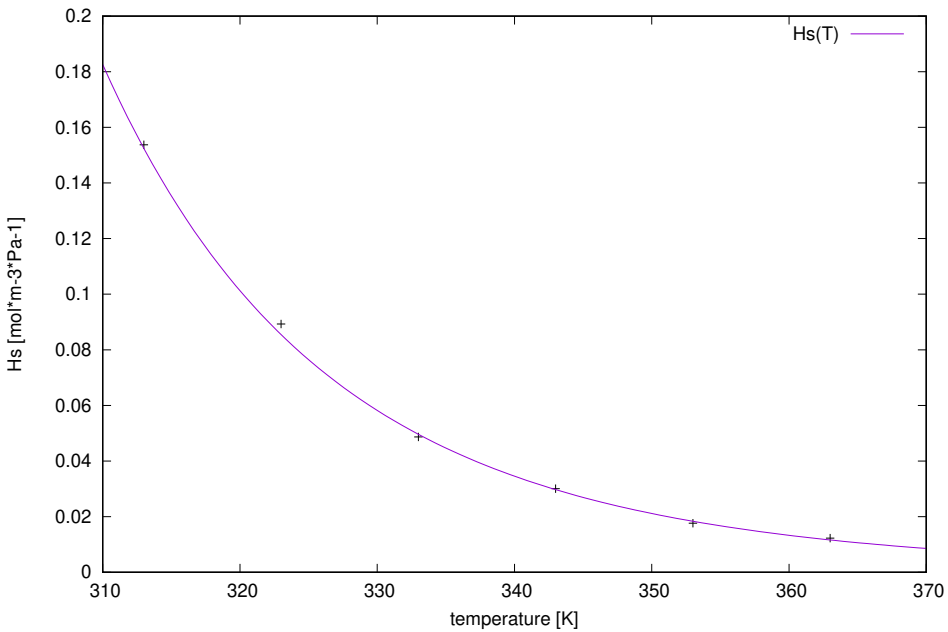

ref = 3112; chem = 2-hexanone; casrn = 591-78-6; r2 = 0.99687

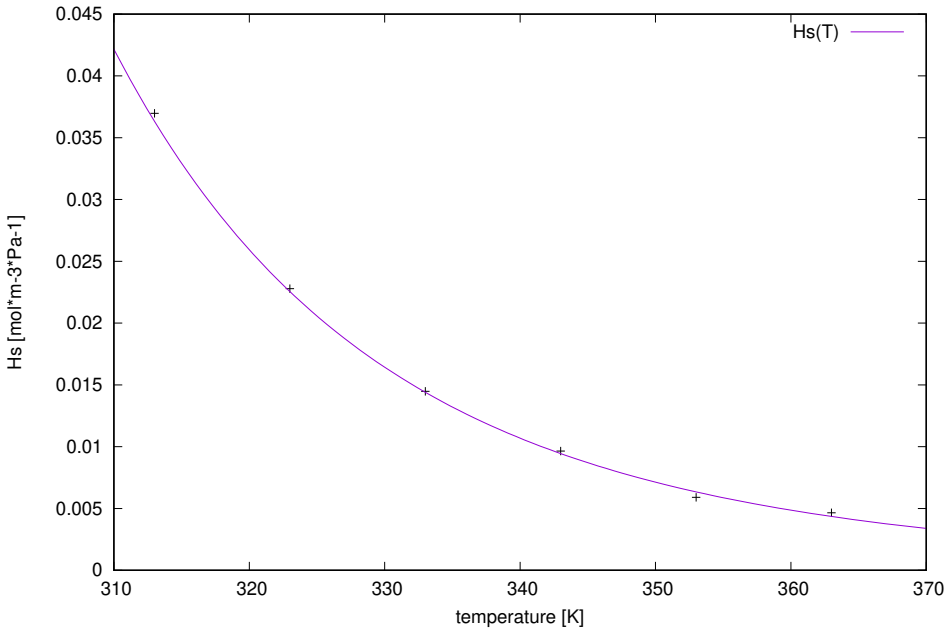

ref = 3112; chem = ethanol; casrn = 64-17-5; r2 = 0.99487

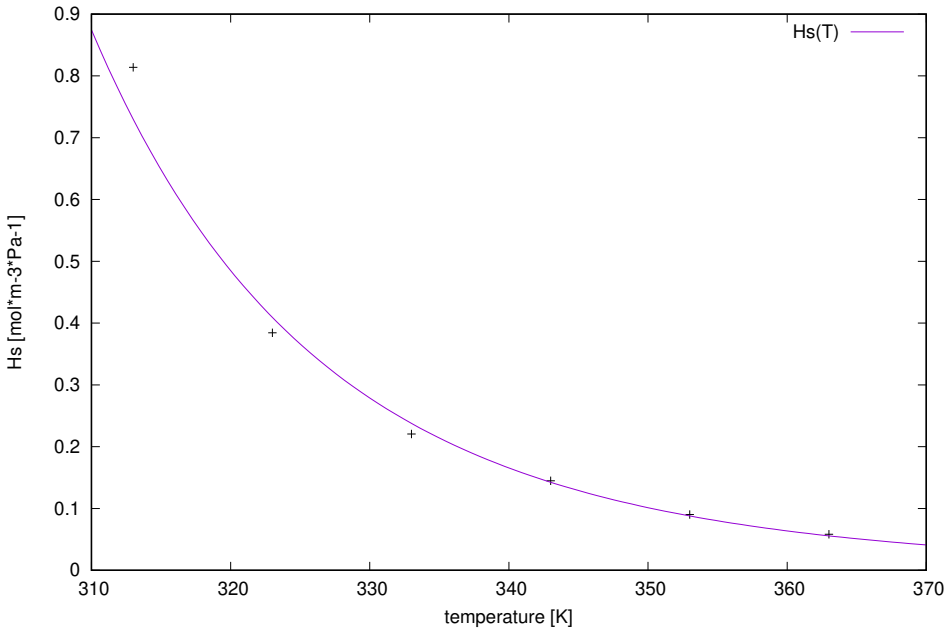

ref = 3112; chem = propanone; casrn = 67-64-1; r2 = 0.99995

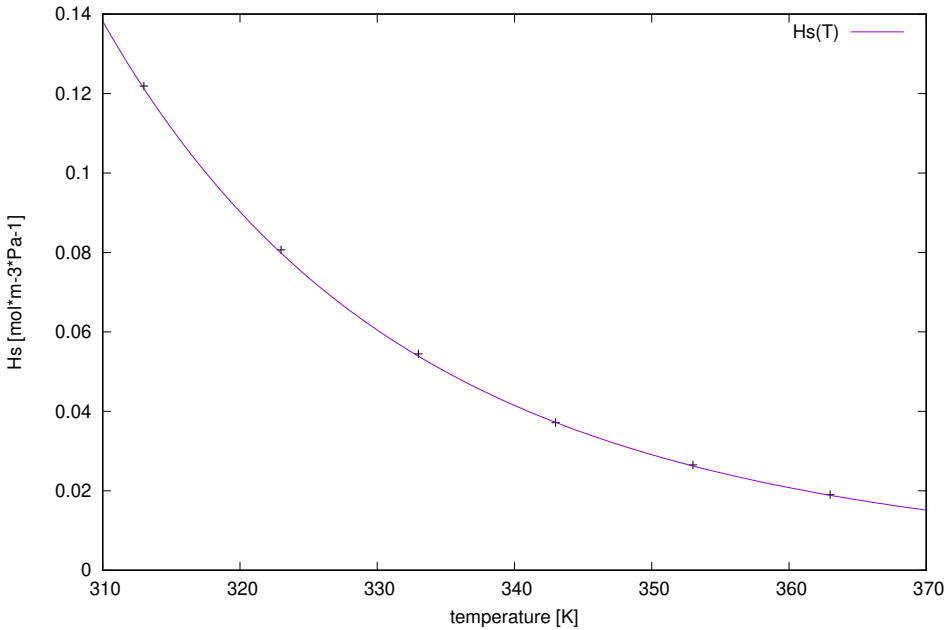



ref = 3112; chem = 1-propanol; casrn = 71-23-8; r2 = 0.99561

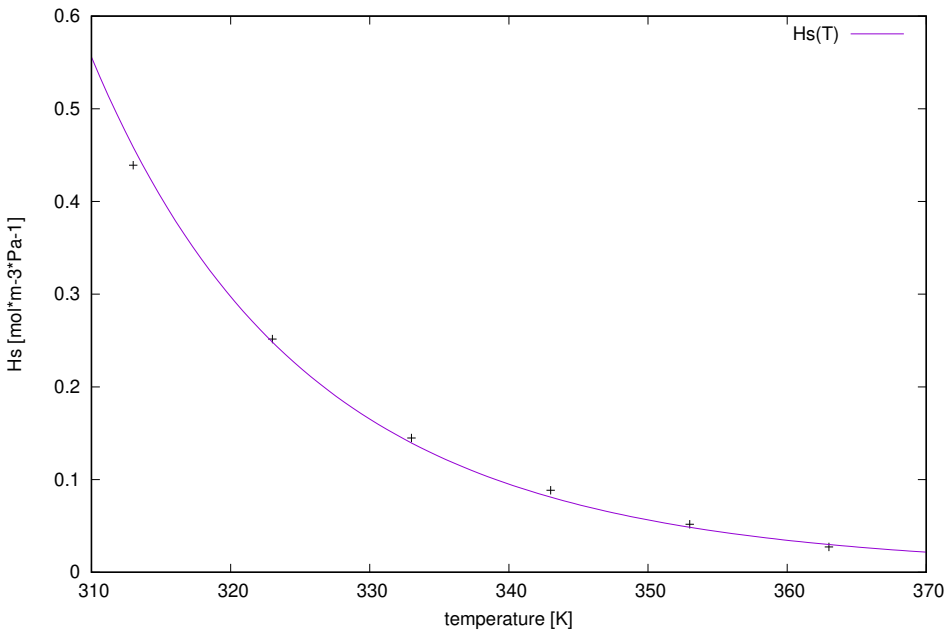

ref = 3112; chem = 1-butanol; casrn = 71-36-3; r2 = 0.99817

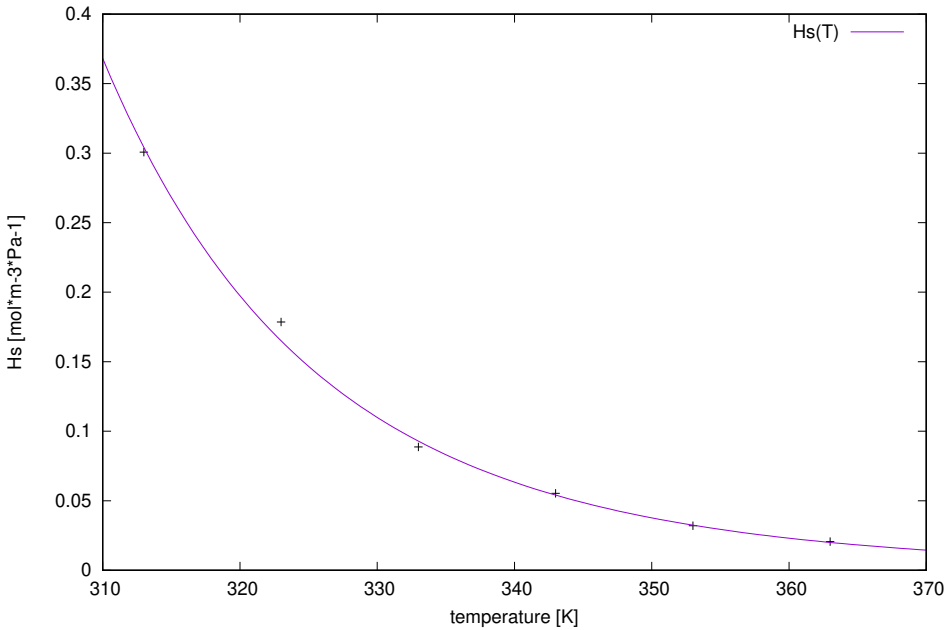

ref = 3112; chem = 1-pentanol; casrn = 71-41-0; r2 = 0.99716

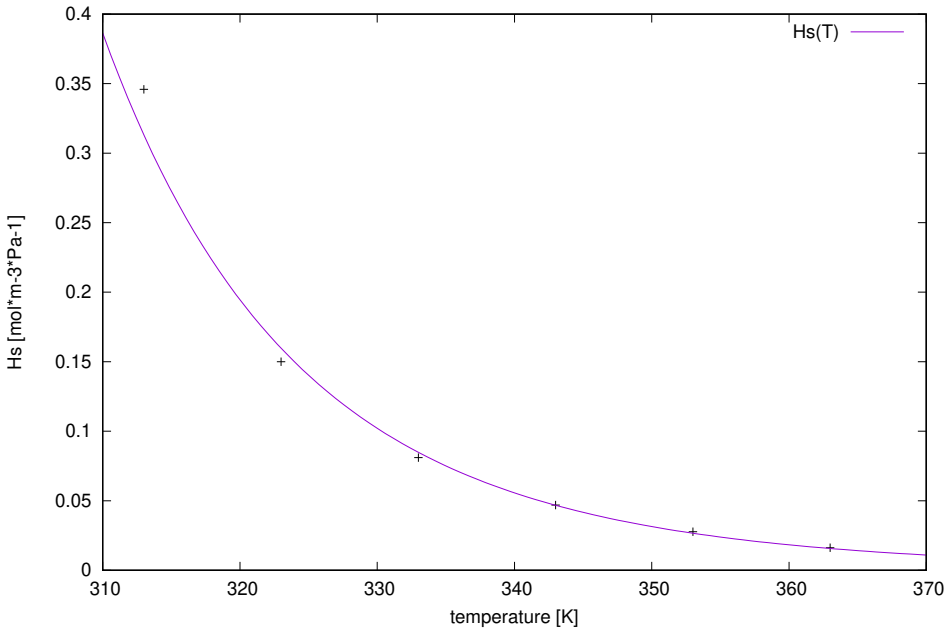

ref = 3112; chem = butanone; casrn = 78-93-3; r2 = 0.99778

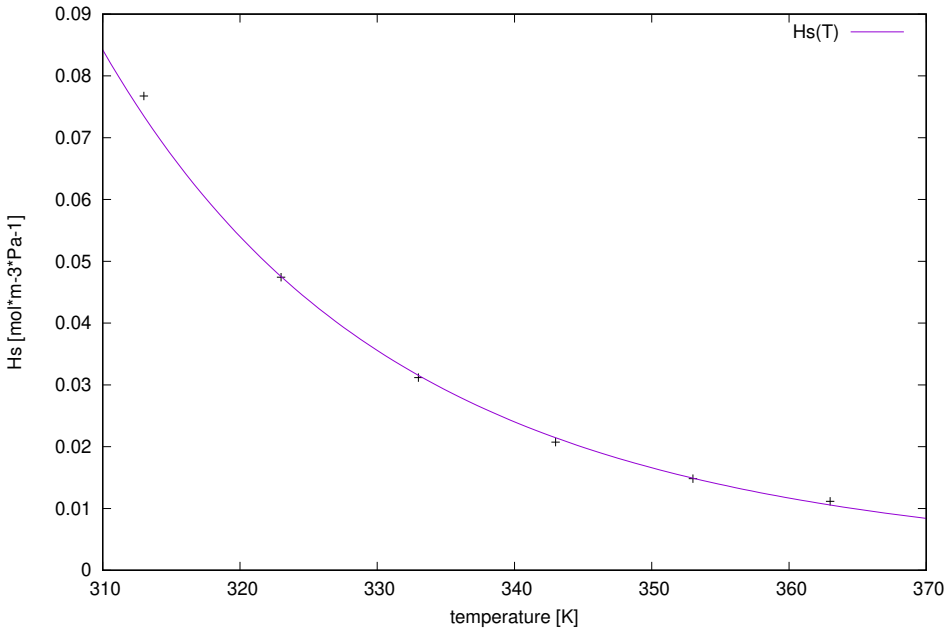

ref = 3115; chem = dimethyl disulfide; casrn = 624-92-0; r2 = 0.99715

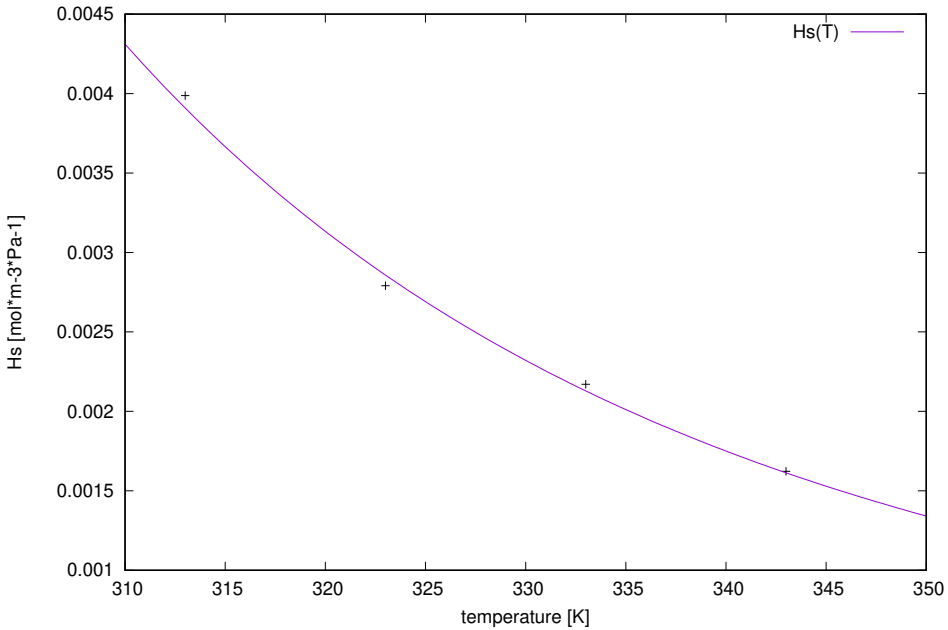

ref = 3115; chem = dimethyl sulfide; casrn = 75-18-3; r2 = 0.99496

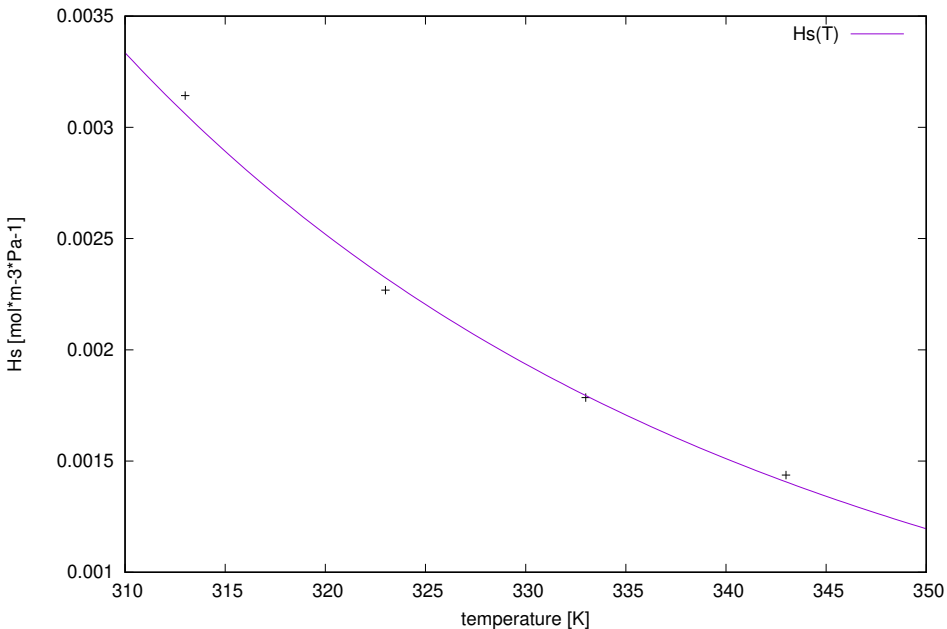

ref = 3116; chem = ethylbenzene; casrn = 100-41-4; r2 = 0.99469

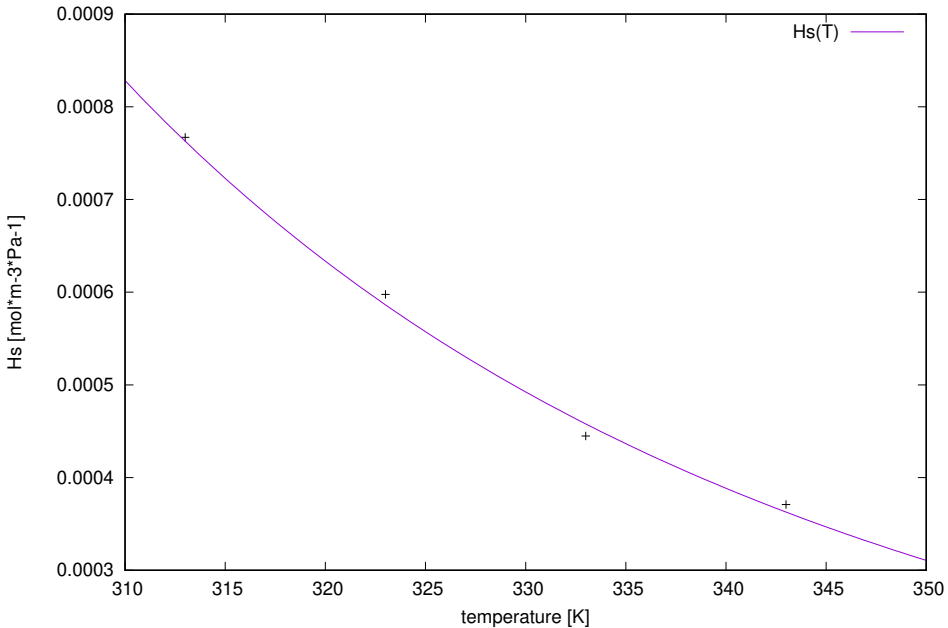

ref = 3116; chem = methylbenzene; casrn = 108-88-3; r2 = 0.99788

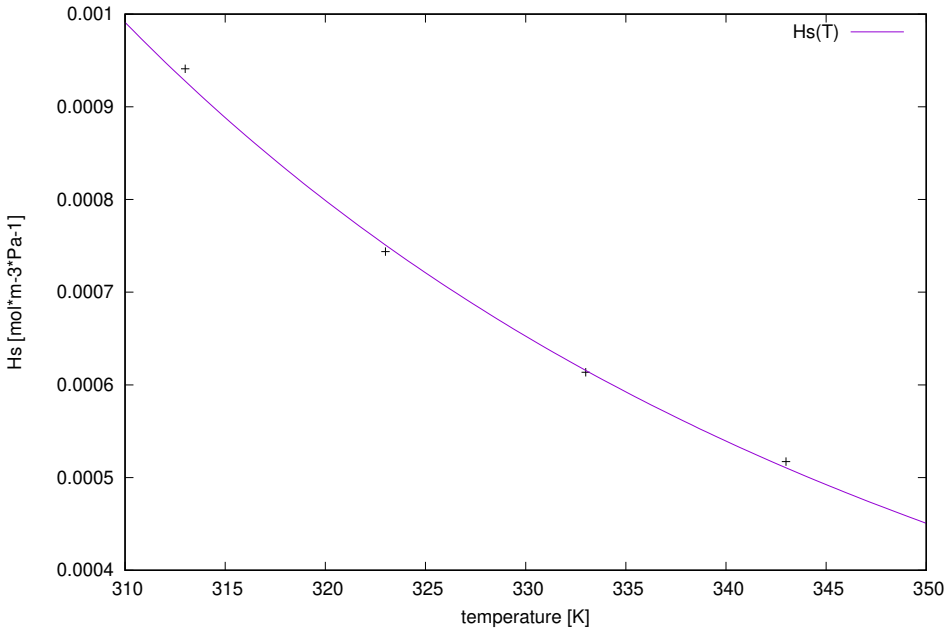



ref = 3116; chem = methyl t-butyl ether; casrn = 1634-04-4; r2 = 0.99940

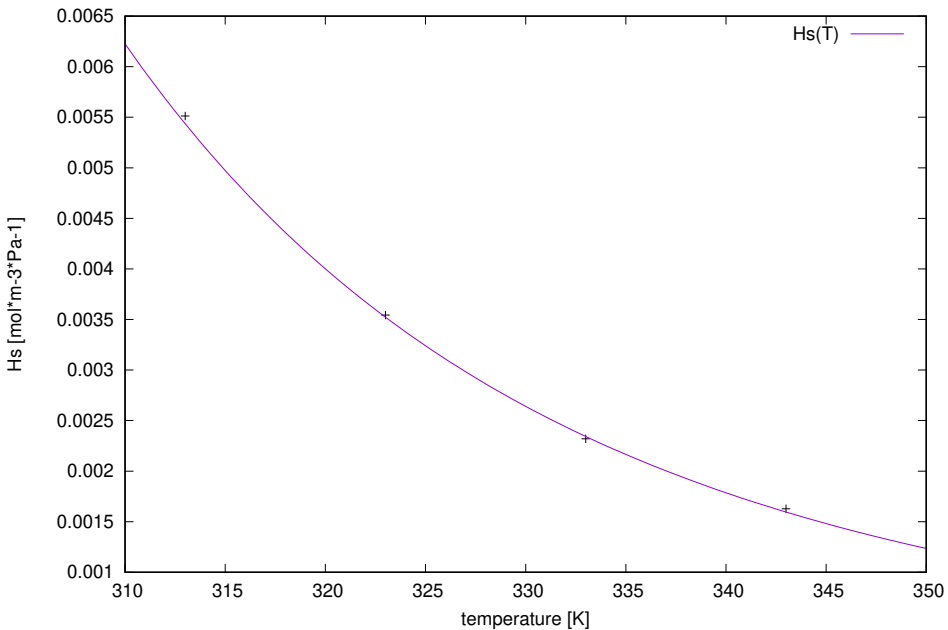

ref = 3116; chem = ethyl t-butyl ether; casrn = 637-92-3; r2 = 0.97840

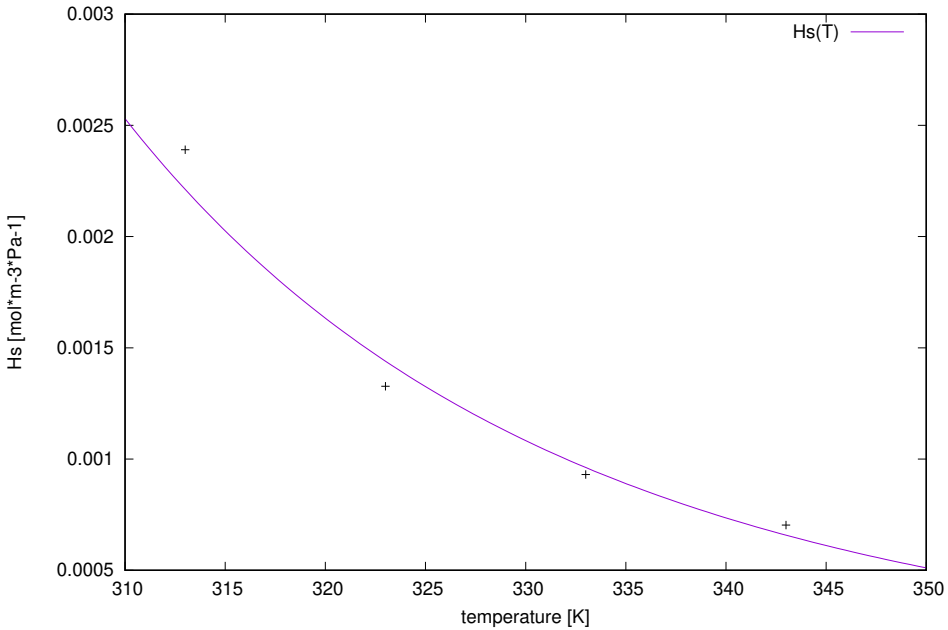

ref = 3116; chem = 1,2-dimethylbenzene; casrn = 95-47-6; r2 = 0.97704

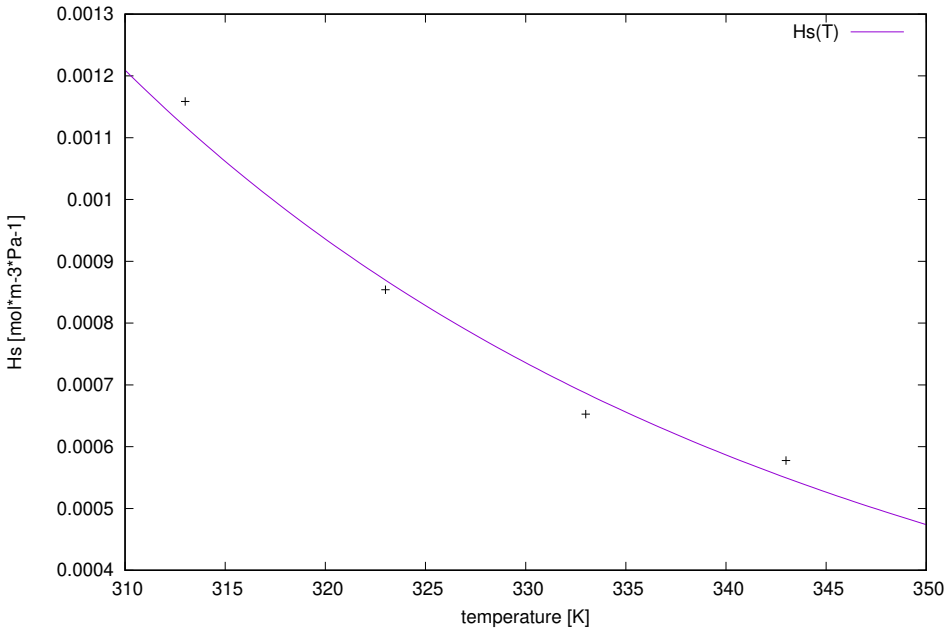

ref = 3117; chem = 2-methylpropane; casrn = 75-28-5; r2 = 0.97211

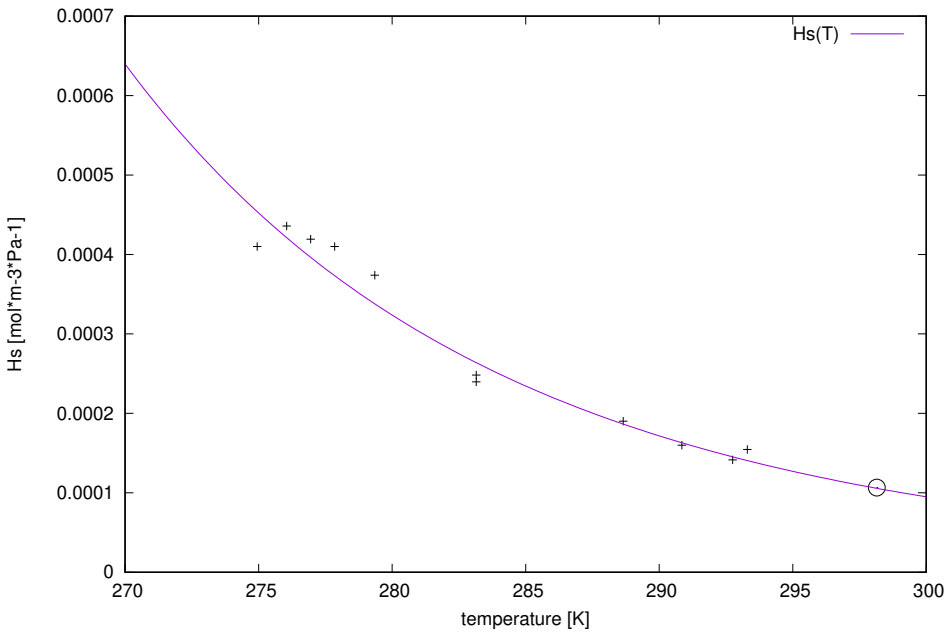

ref = 3118; chem = 6-bromo-2,5-dichloroanisole; casrn = 174913-14-5; r2 = 1.00000

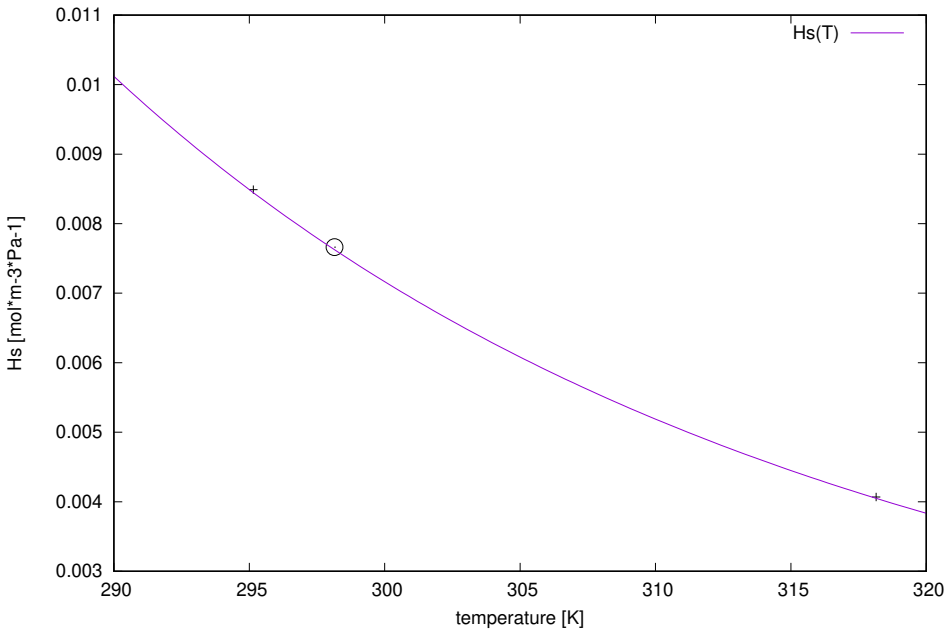

ref = 3118; chem = 3-bromo-2,6-dichloroanisole; casrn = 174913-18-9; r2 = 1.00000

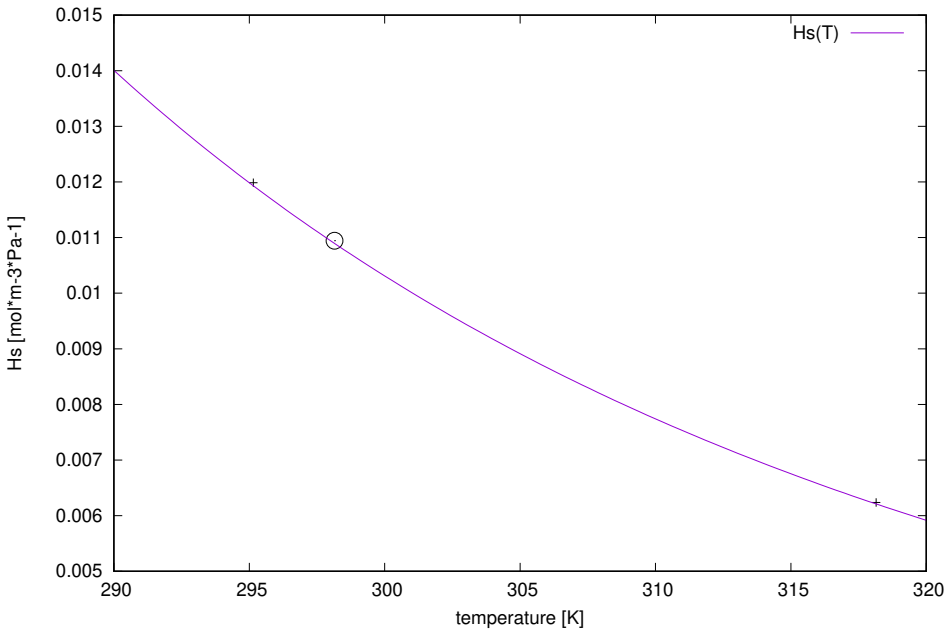

ref = 3118; chem = 2,6-dibromo-4-chloroanisole; casrn = 174913-44-1; r2 = 1.00000

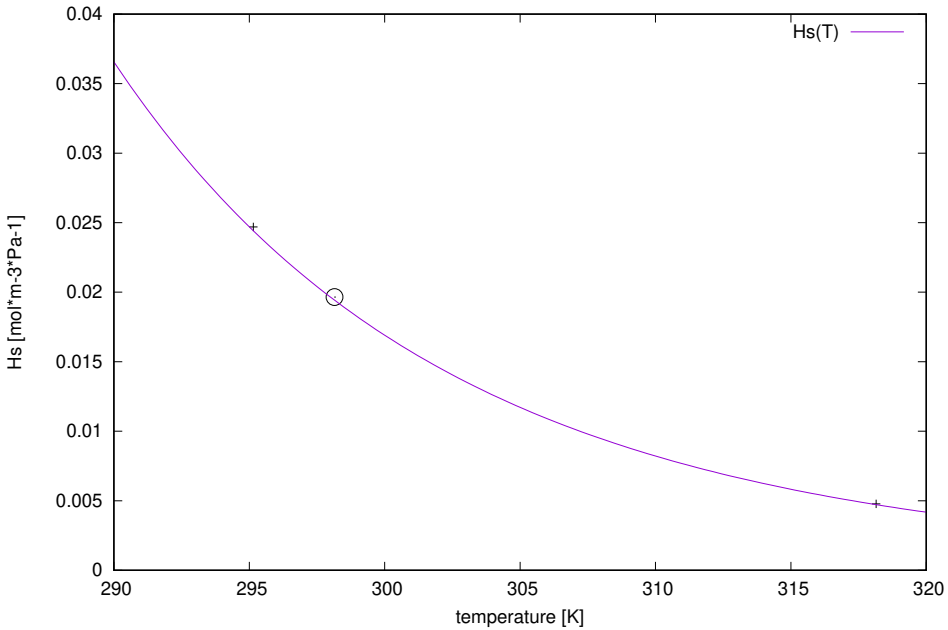

ref = 3118; chem = 4-bromo-2,6-dichloroanisol; casrn = 19240-91-6; r2 = 1.00000

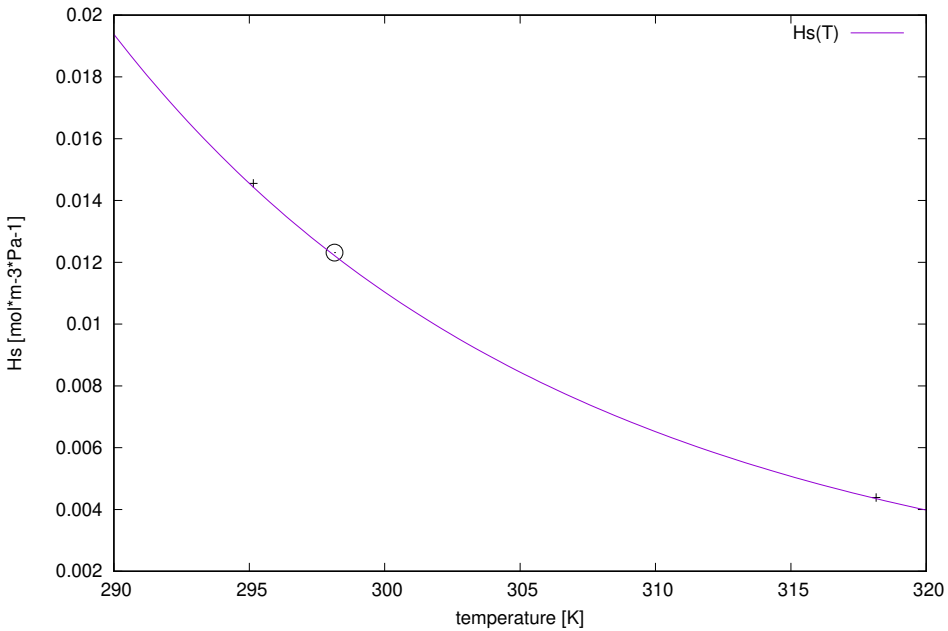



ref = 3118; chem = 2,3,6-trichloroanisole; casrn = 50375-10-5; r2 = 1.00000

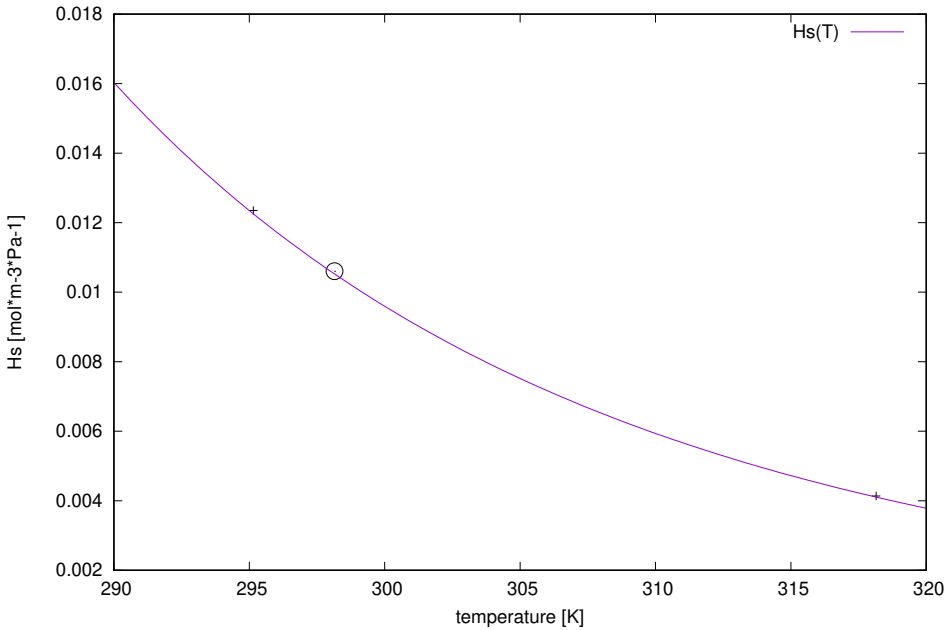

ref = 3118; chem = 6-bromo-2,4-dichloroanisole; casrn = 60633-26-3; r2 = 1.00000

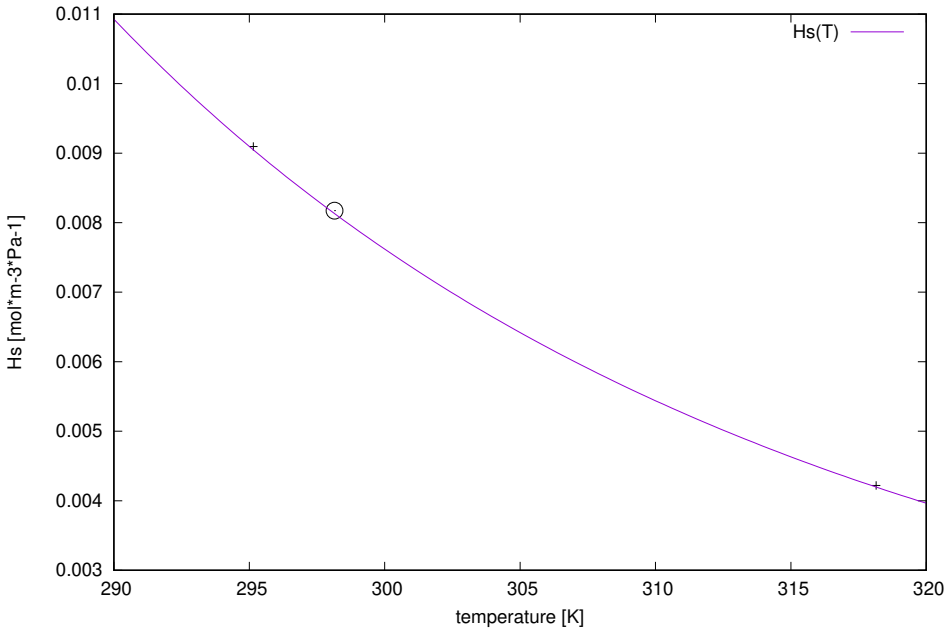

ref = 3118; chem = 2,4,6-tribromoanisole; casrn = 607-99-8; r2 = 1.00000

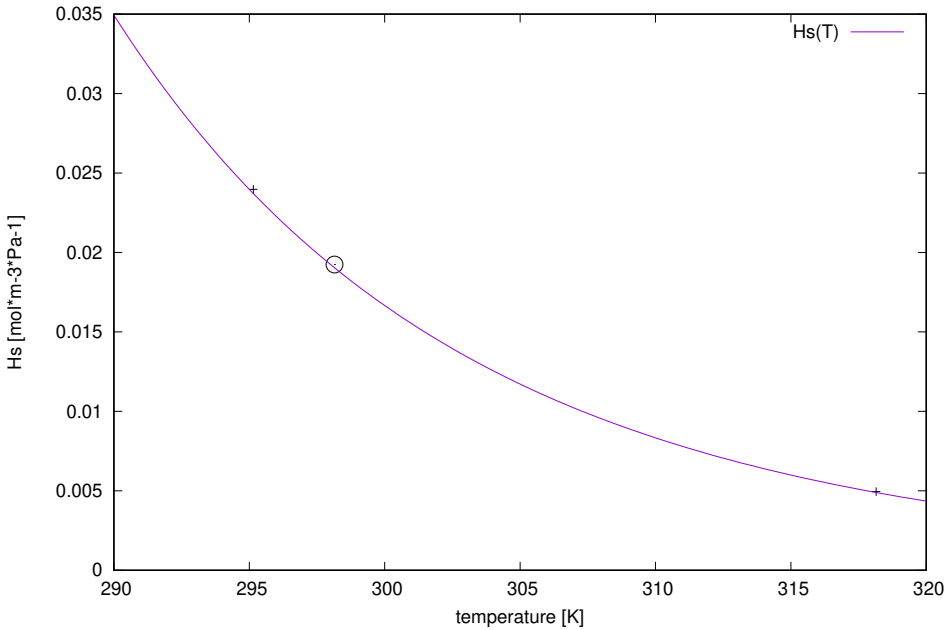

ref = 3118; chem = 2,4,6-trichloroanisole; casrn = 87-40-1; r2 = 1.00000

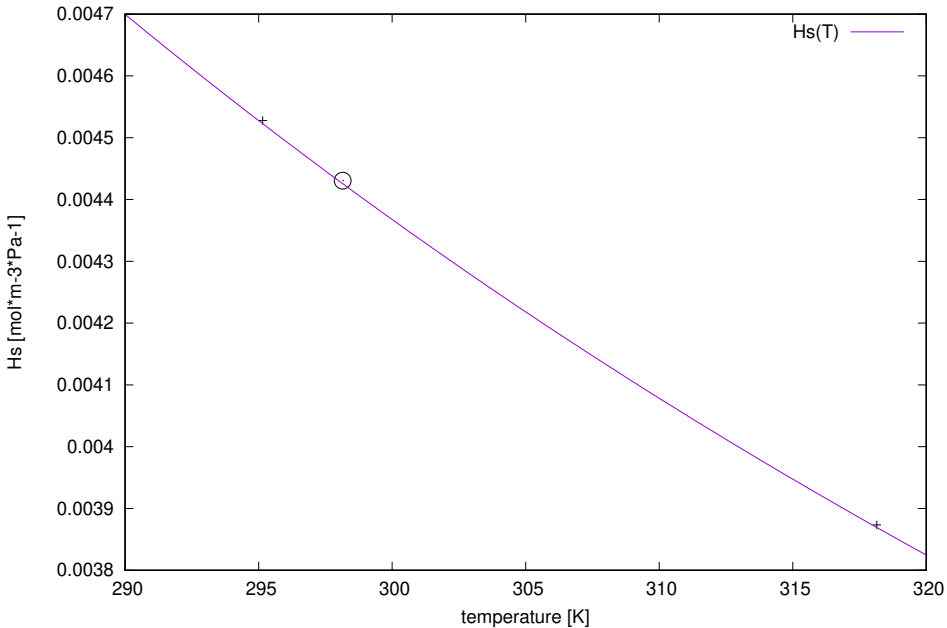

ref = 3118; chem = 2,3,6-tribromoanisole; casrn = 95970-19-7; r2 = 1.00000

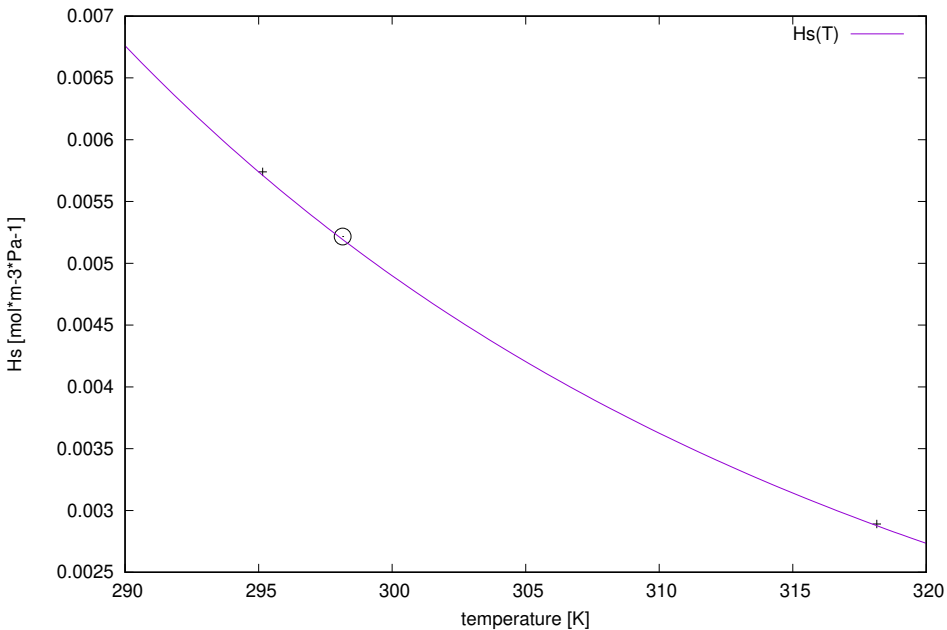

ref = 3118; chem = 2,6-dibromo-3-chloroanisole; casrn = ; r2 = 1.00000

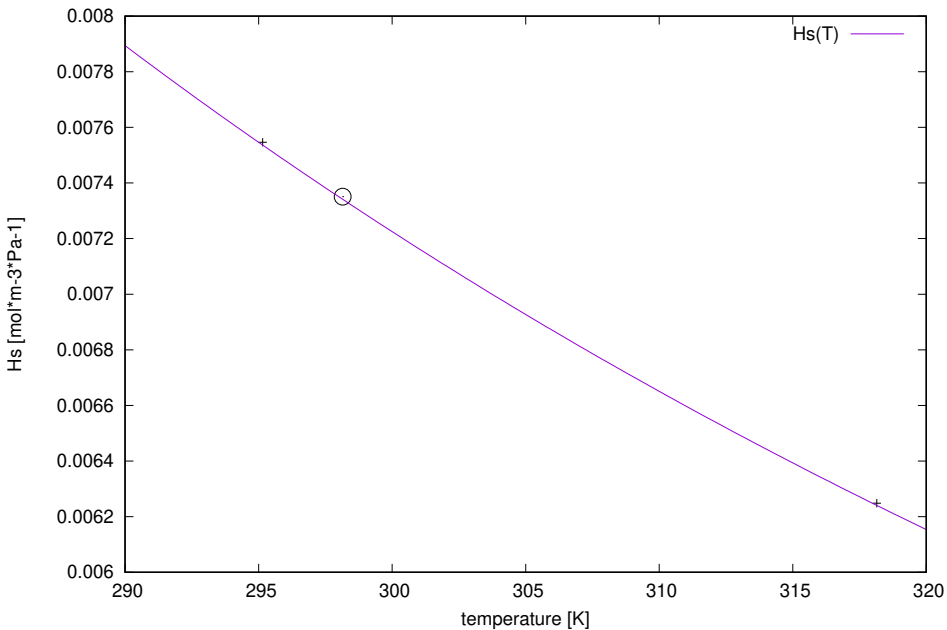

ref = 3119; chem = carbon oxide sulfide; casrn = 463-58-1; r2 = 0.99464

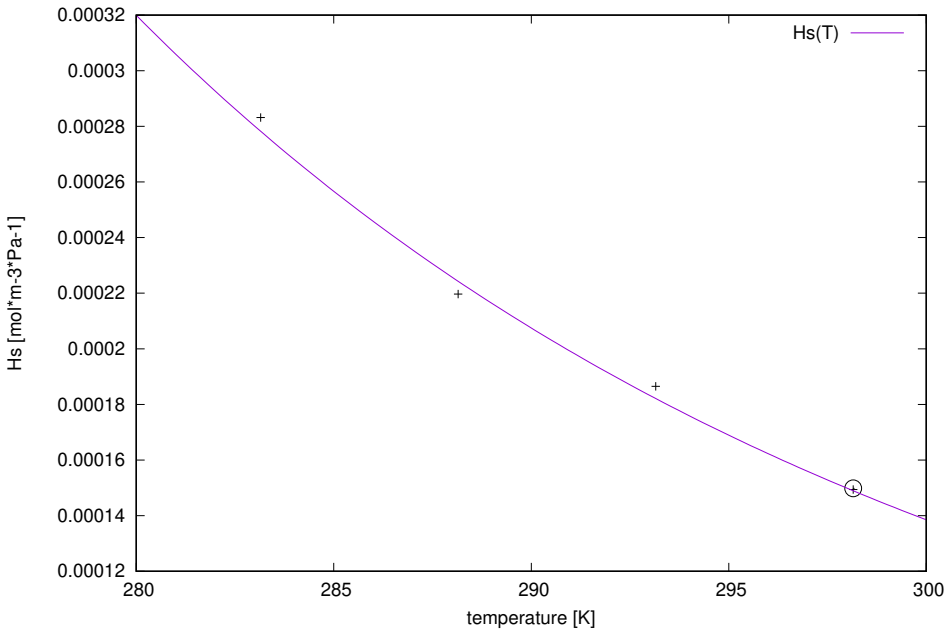

ref = 3123; chem = dinitrogen tetroxide; casrn = 10544-72-6; r2 = 1.00000

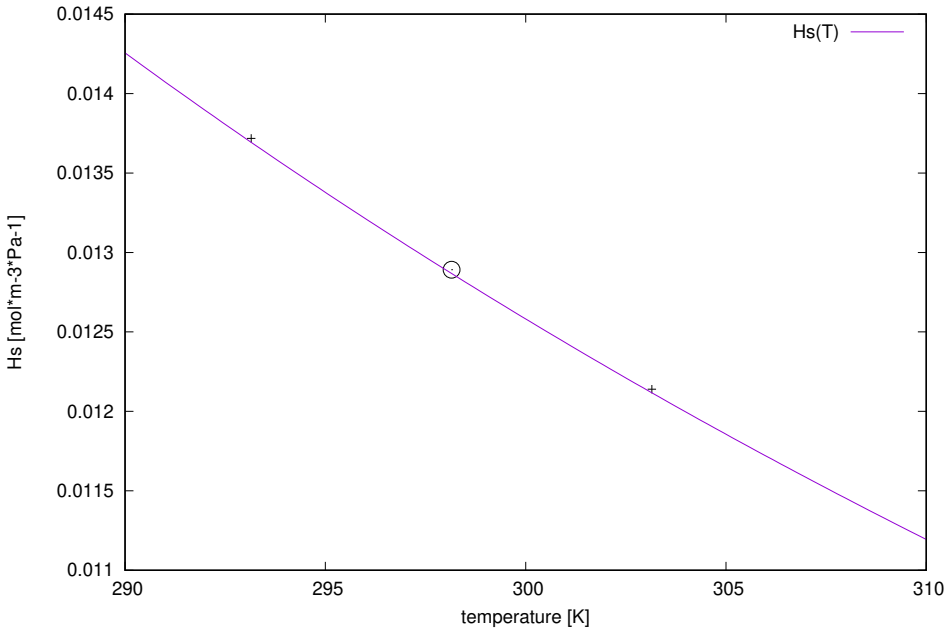



ref = 3126; chem = methane; casrn = 74-82-8; r2 = 0.99889

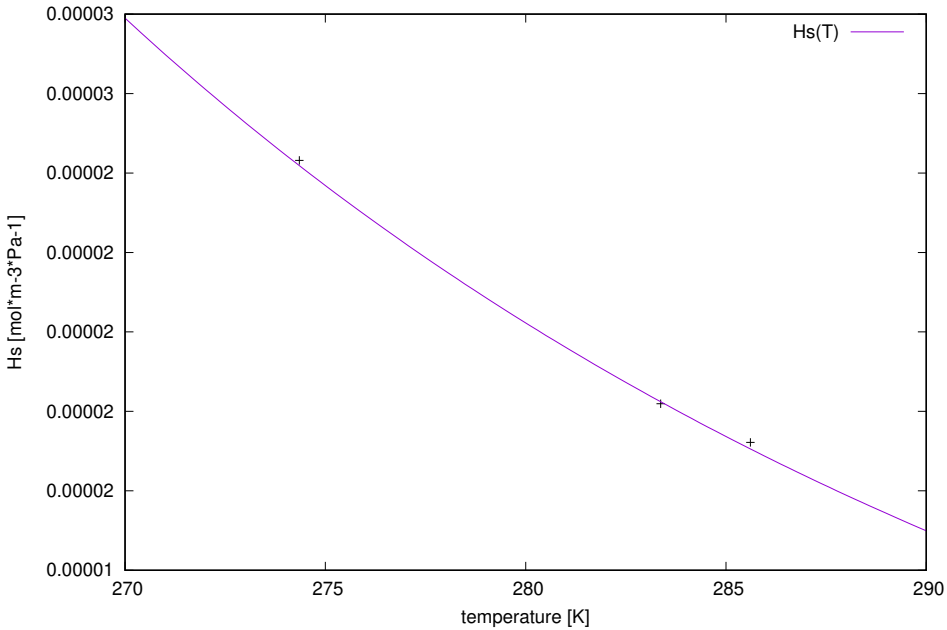

ref = 3132; chem = methanol; casrn = 67-56-1; r2 = 0.99841

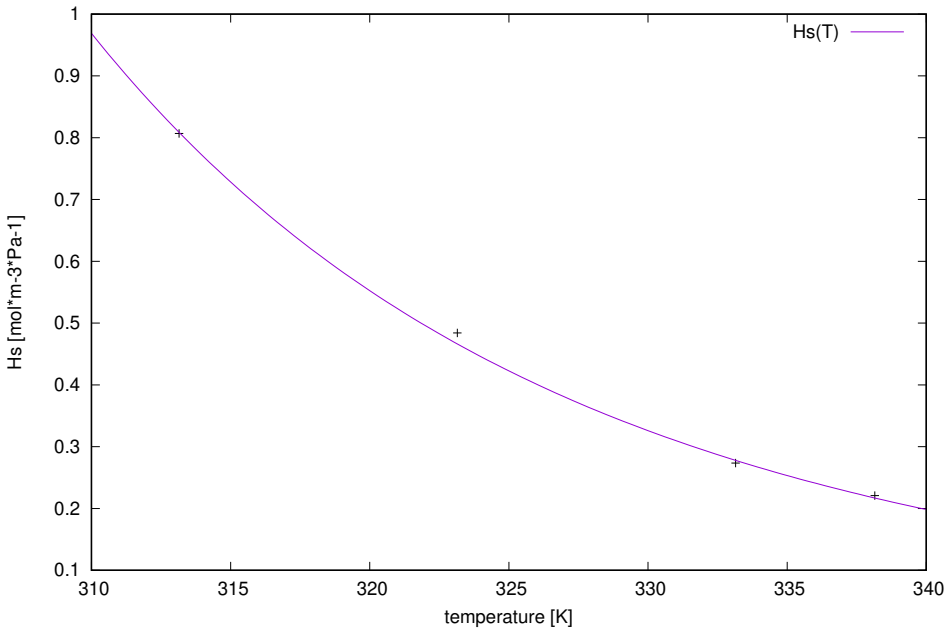

ref = 3214; chem = methyl lactate; casrn = 547-64-8; r2 = 0.99982

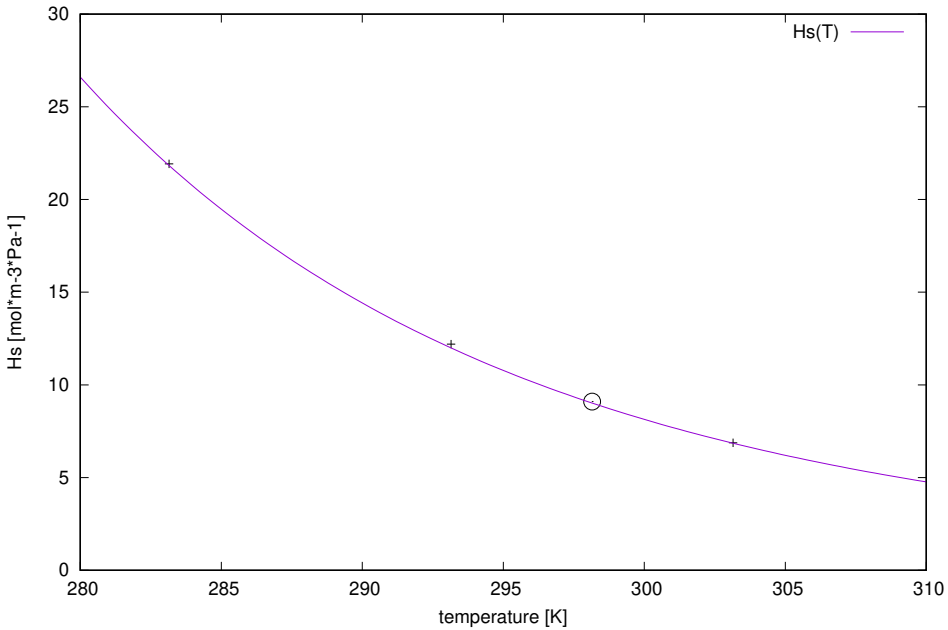

ref = 3215; chem = Ethyl-3-methyl butanoate; casrn = 108-64-5; r2 = 1.00000

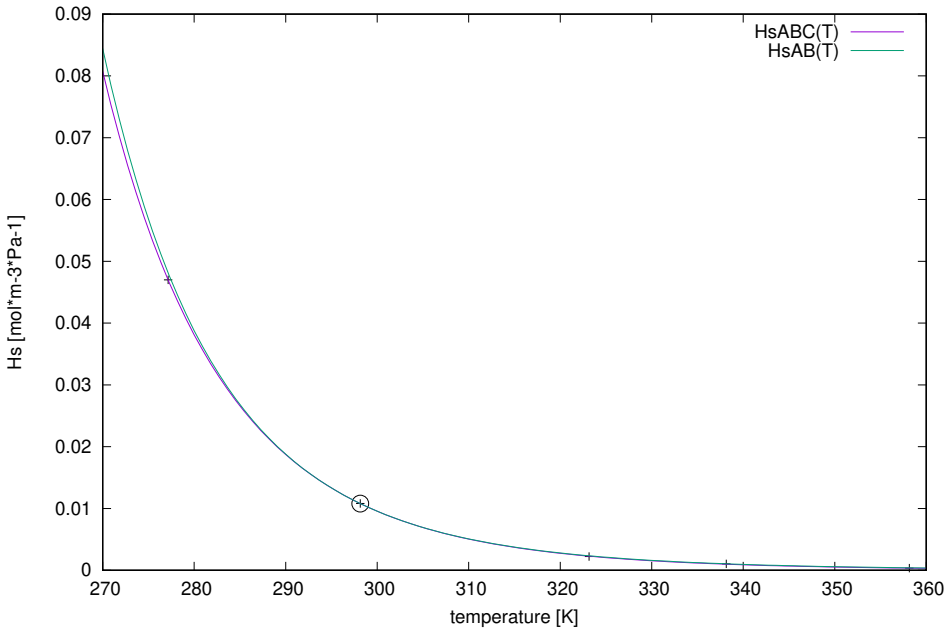

ref = 3215; chem = 2-Ethyl-3,5-dimethylpyrazine; casrn = 13925-07-0; r2 = 1.00000

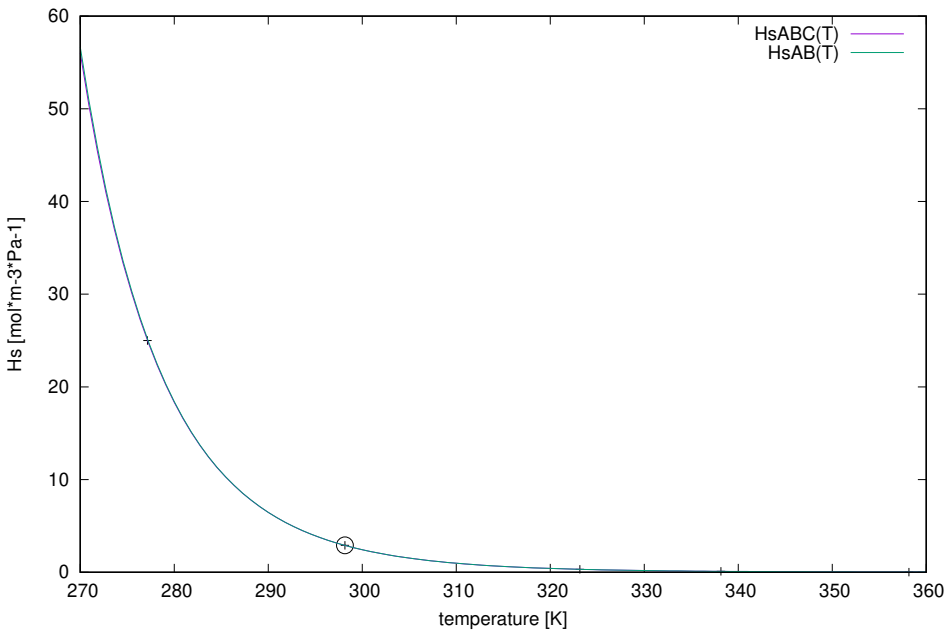

ref = 3215; chem = (E)-beta-damascenone; casrn = 23726-93-4; r2 = 0.99997

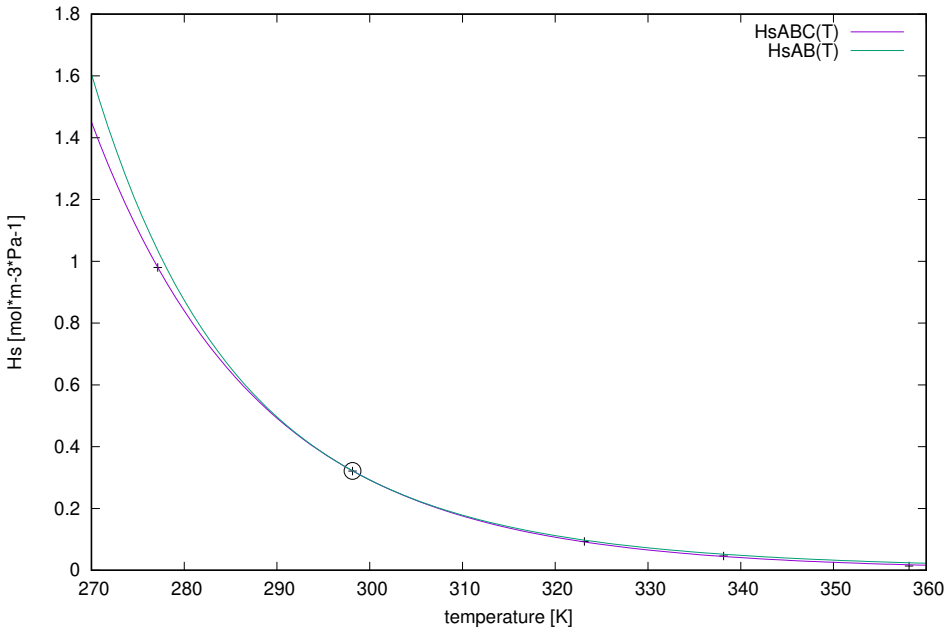

ref = 3215; chem = 2,3-Butanedione; casrn = 431-03-8; r2 = 1.00000

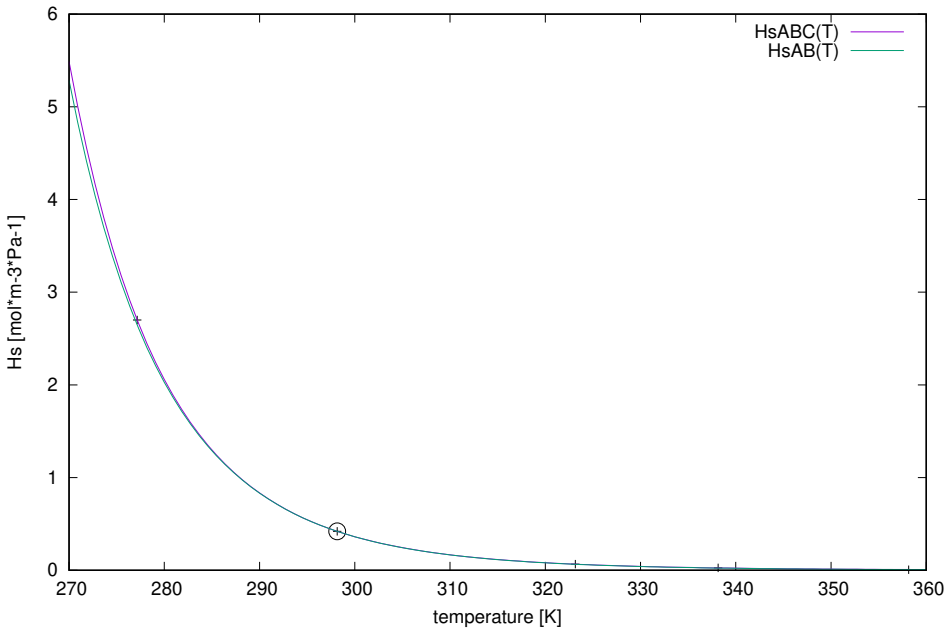

ref = 3215; chem = 2-Methylfuran; casrn = 534-22-5; r2 = 0.99907

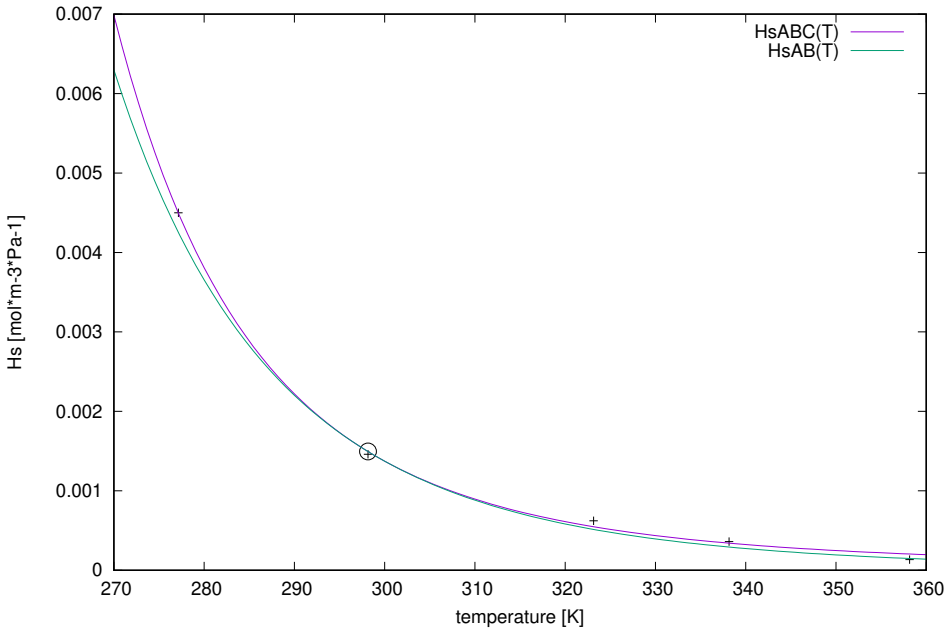



ref = 3215; chem = 3-Methylbutanal; casrn = 590-86-3; r2 = 0.99998

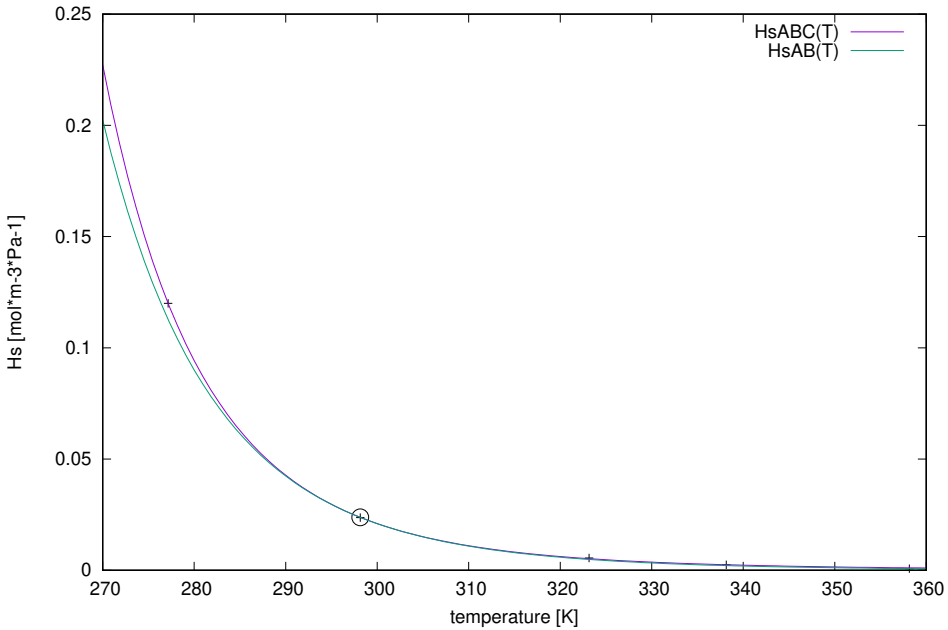

ref = 3215; chem = Acetaldehyde; casrn = 75-07-0; r2 = 0.99996

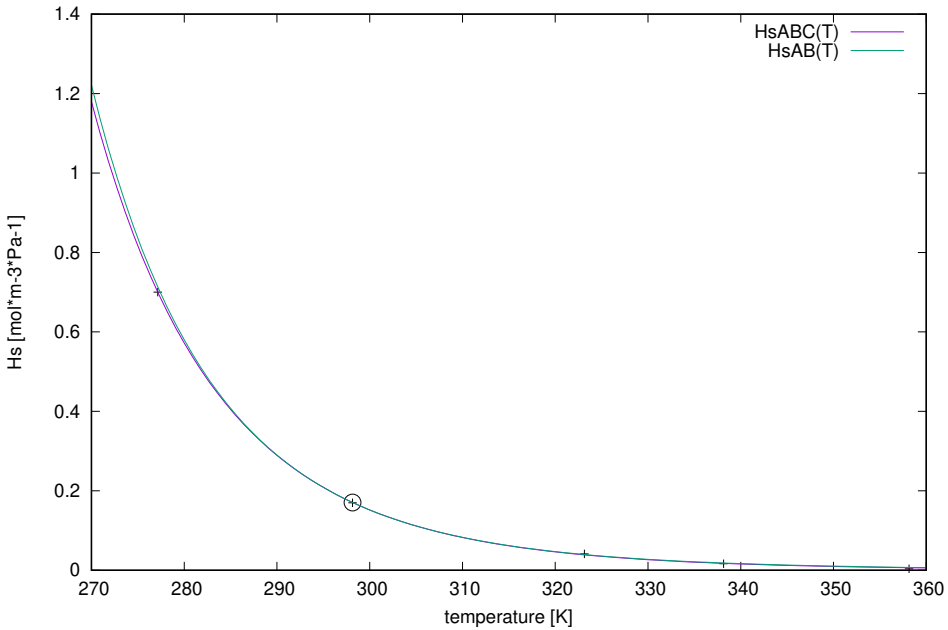

ref = 3215; chem = Guaiacol; casrn = 90-05-1; r2 = 1.00000

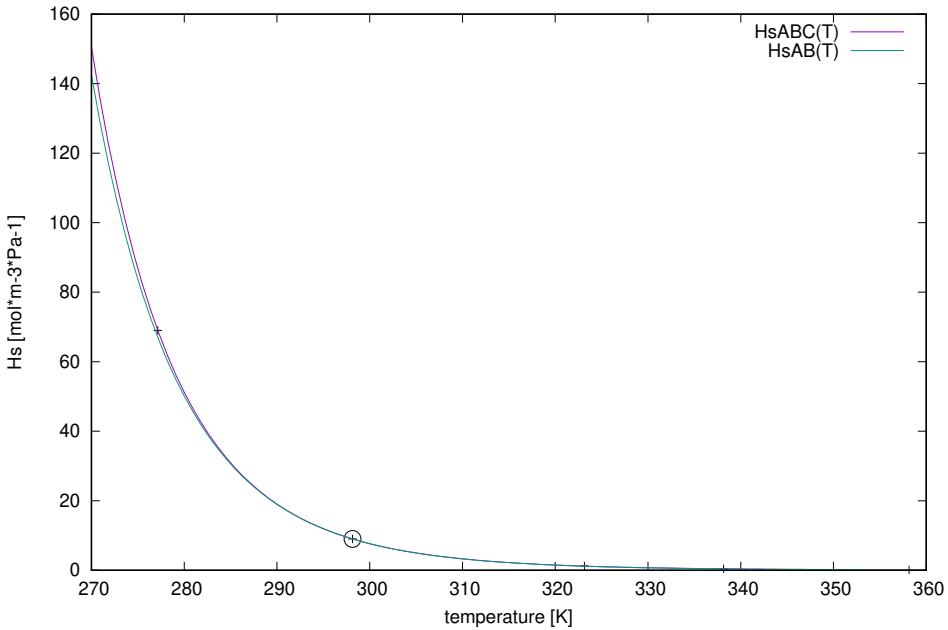

ref = 3261; chem = pentafluoroethane; casrn = 354-33-6; r2 = 0.99010

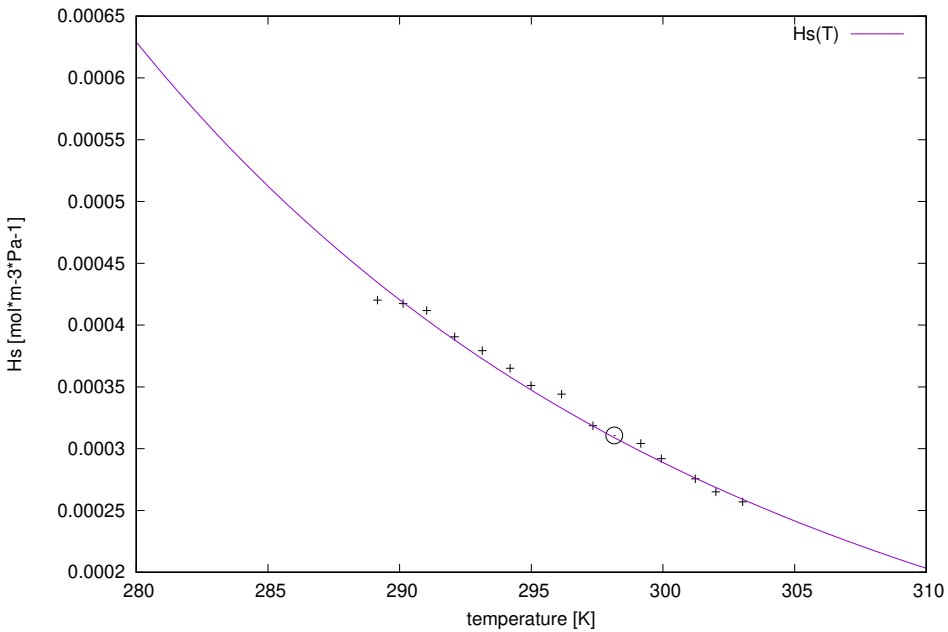

ref = 3261; chem = difluoromethane; casrn = 75-10-5; r2 = 0.98977

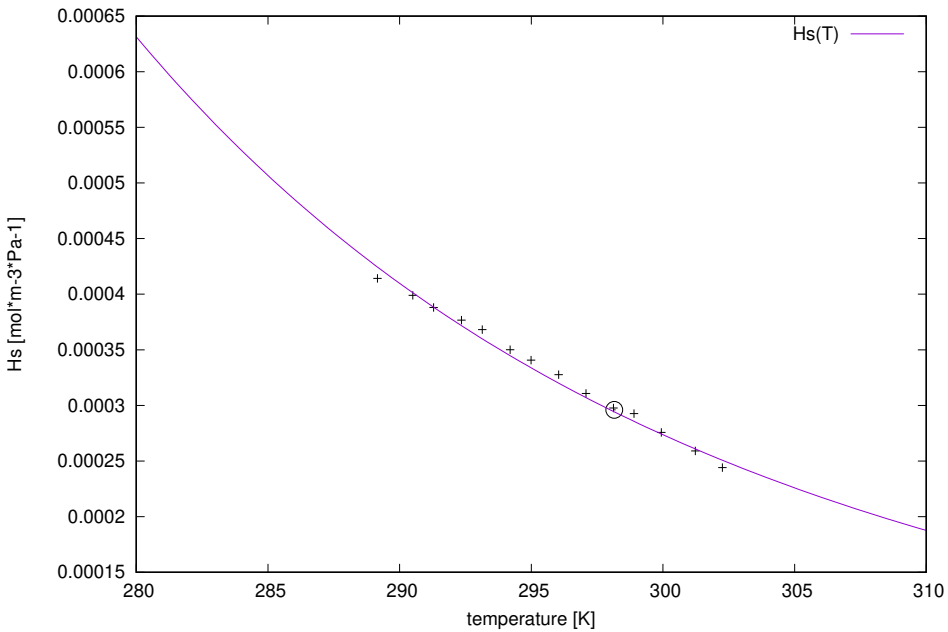

ref = 3261; chem = trifluoromethane; casrn = 75-46-7; r2 = 0.99791

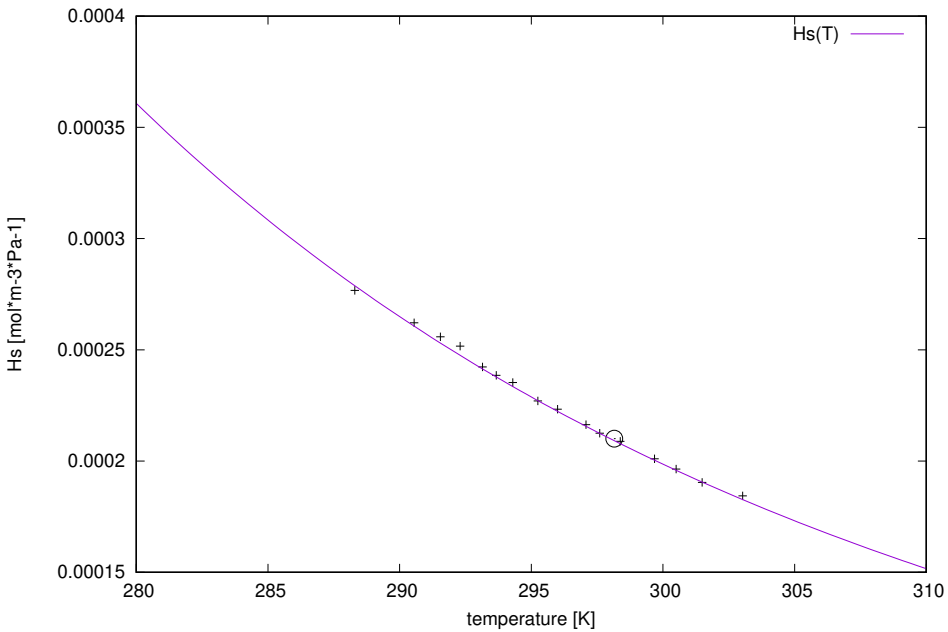

ref = 3262; chem = difluoromethane; casrn = 75-10-5; r2 = 0.99716

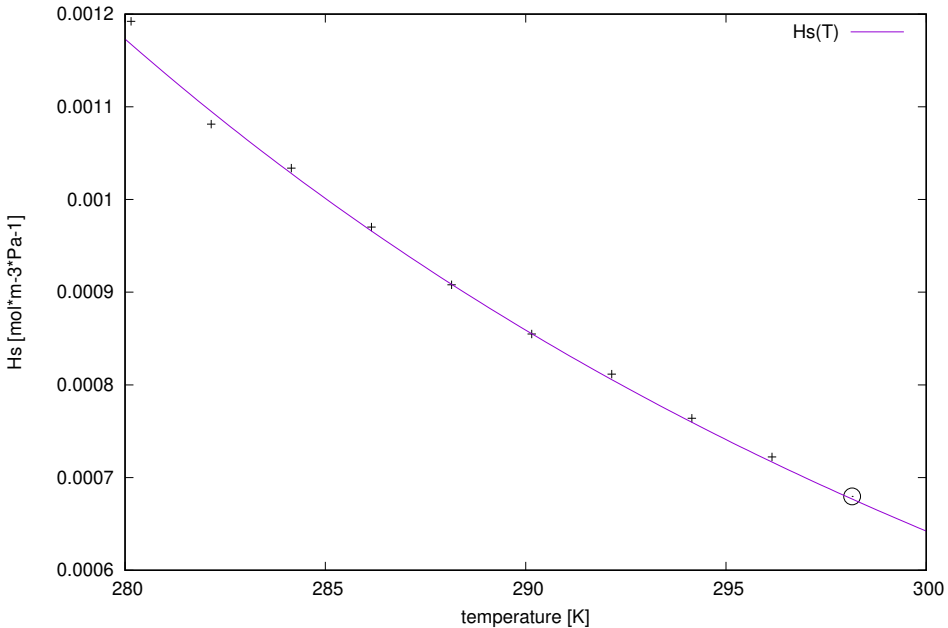

ref = 3303; chem = geosmin; casrn = 19700-21-1; r2 = 0.99420

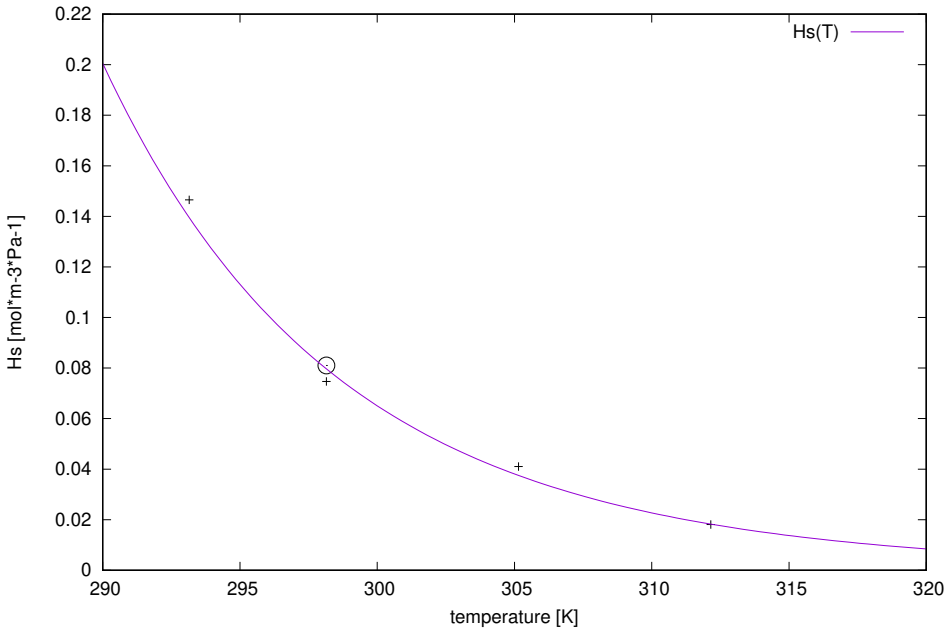



ref = 3303; chem = 2-methylisoborneol; casrn = 2371-42-8; r2 = 0.99406

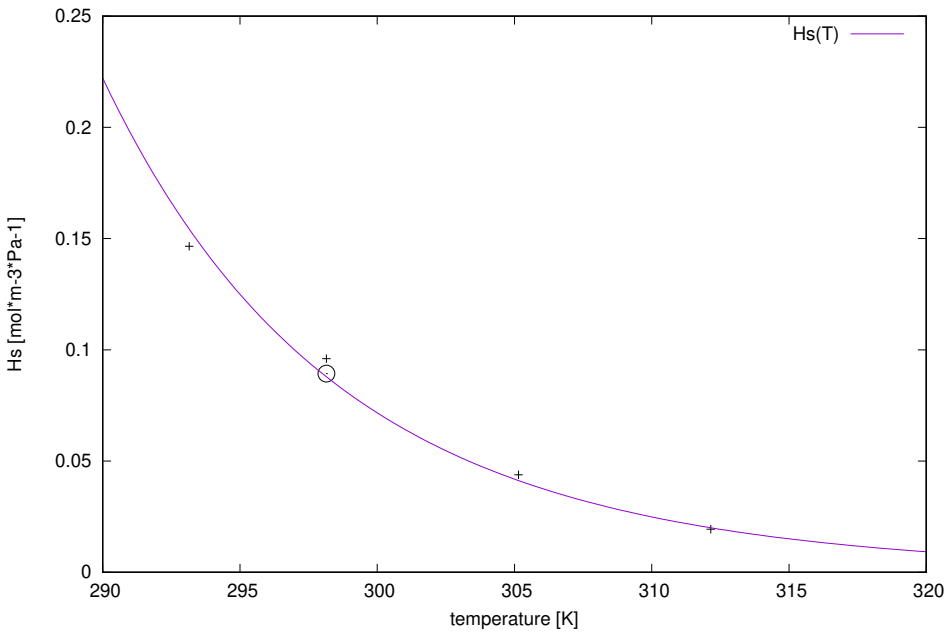

ref = 3303; chem = trans-2,cis-6-nonadienal; casrn = 557-48-2; r2 = 0.98491

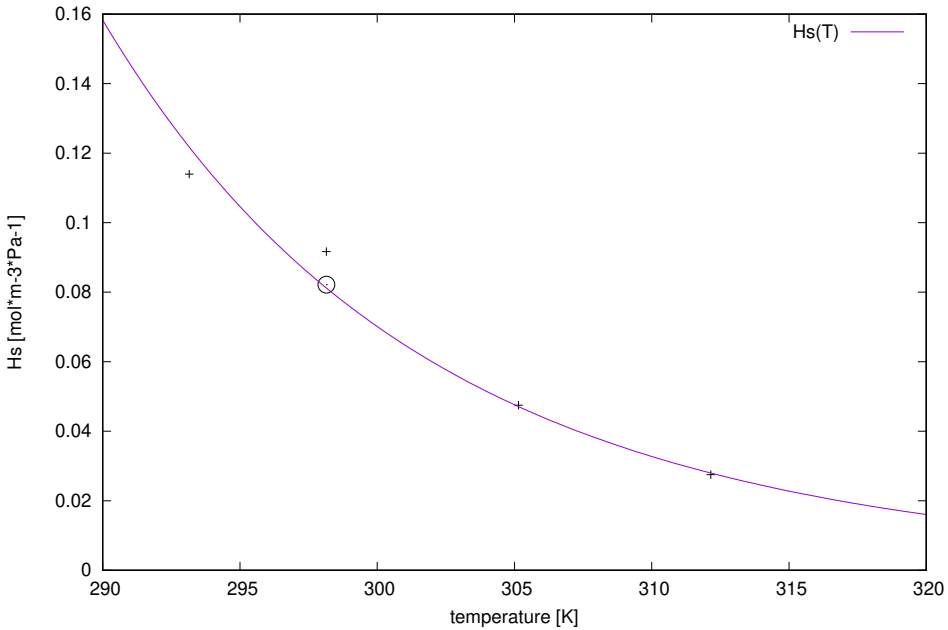

ref = 3304; chem = 1-propanethiol; casrn = 107-03-9; r2 = 0.99976

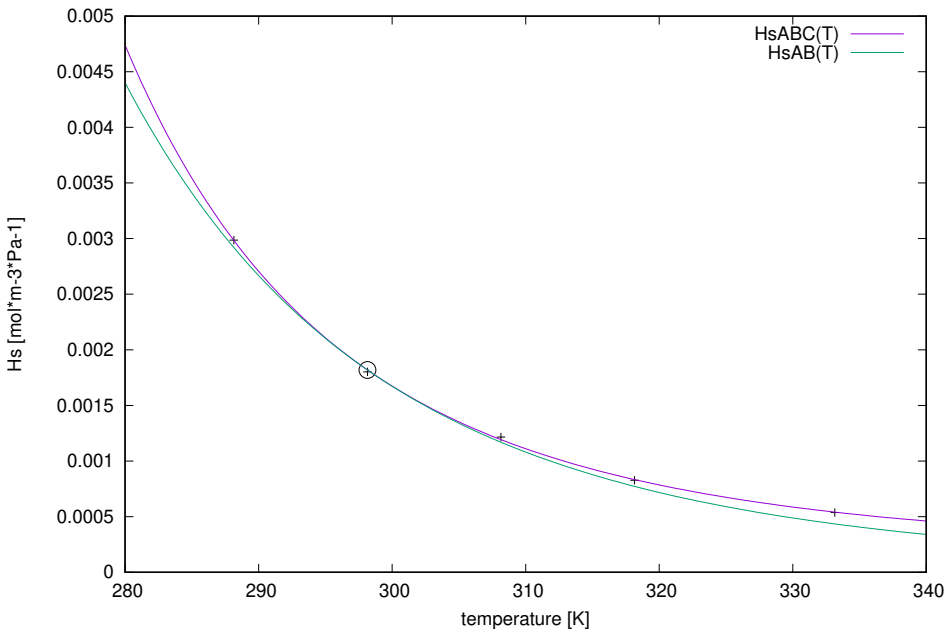

ref = 3304; chem = 1-butanethiol; casrn = 109-79-5; r2 = 0.99991

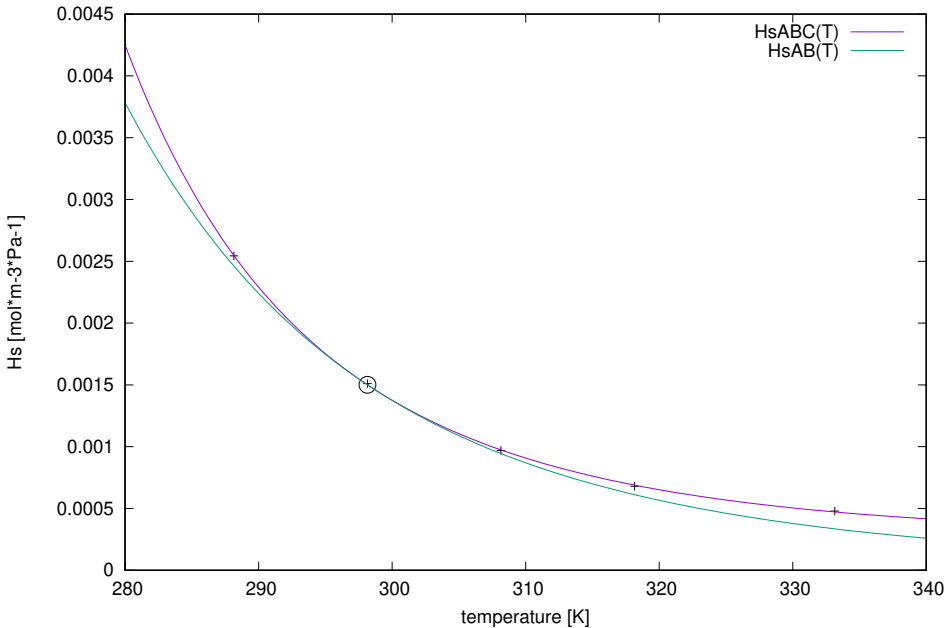

ref = 3304; chem = thiophene; casrn = 110-02-1; r2 = 0.99941

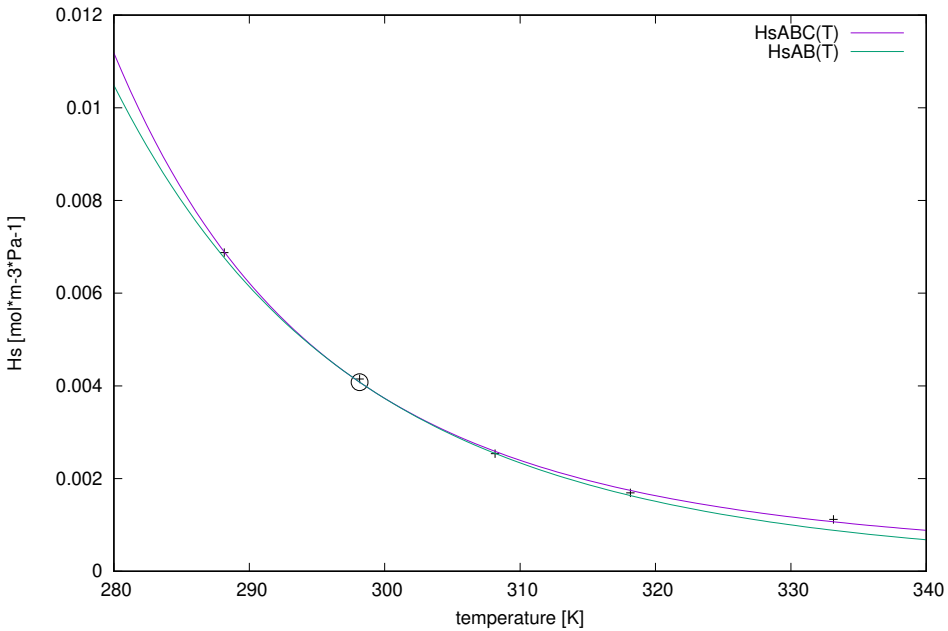

ref = 3304; chem = methyl tert-butyl ether; casrn = 1634-04-4; r2 = 0.99967

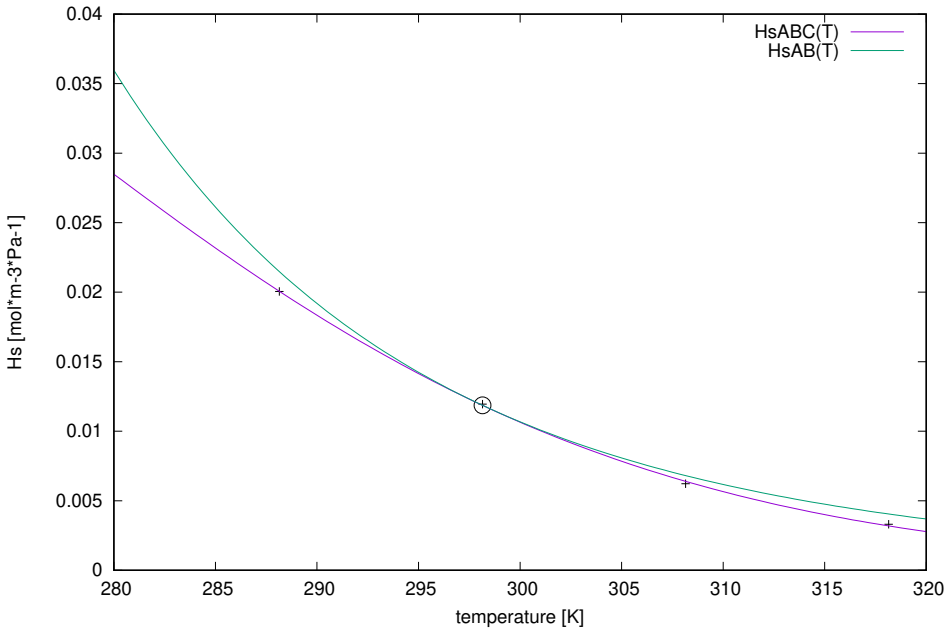

ref = 3304; chem = 2-ethoxy-2,4,4-trimethylpentane; casrn = 187103-12-4; r2 = 0.99998

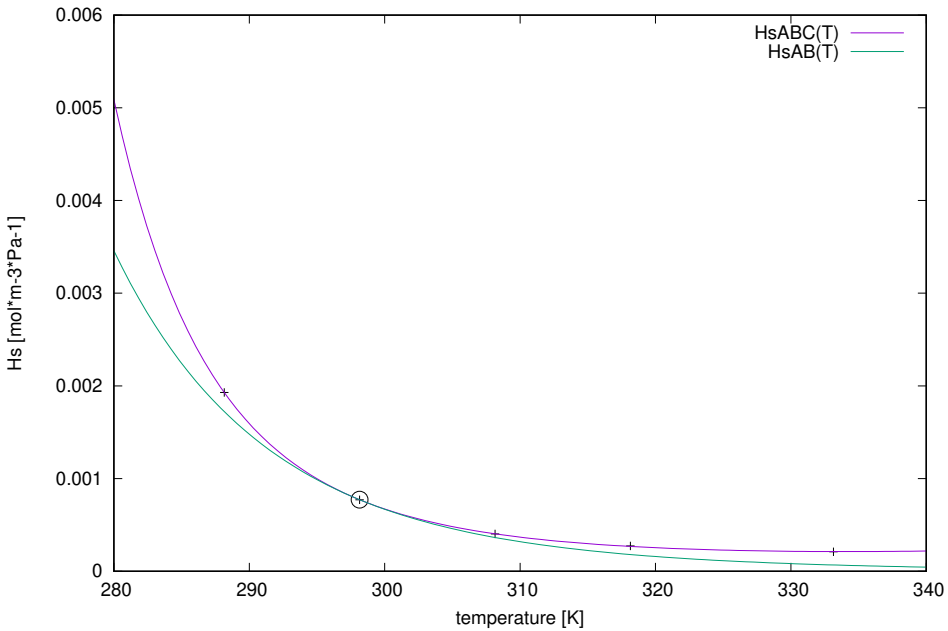

ref = 3304; chem = ethyl tert-butyl ether; casrn = 637-92-3; r2 = 0.99972

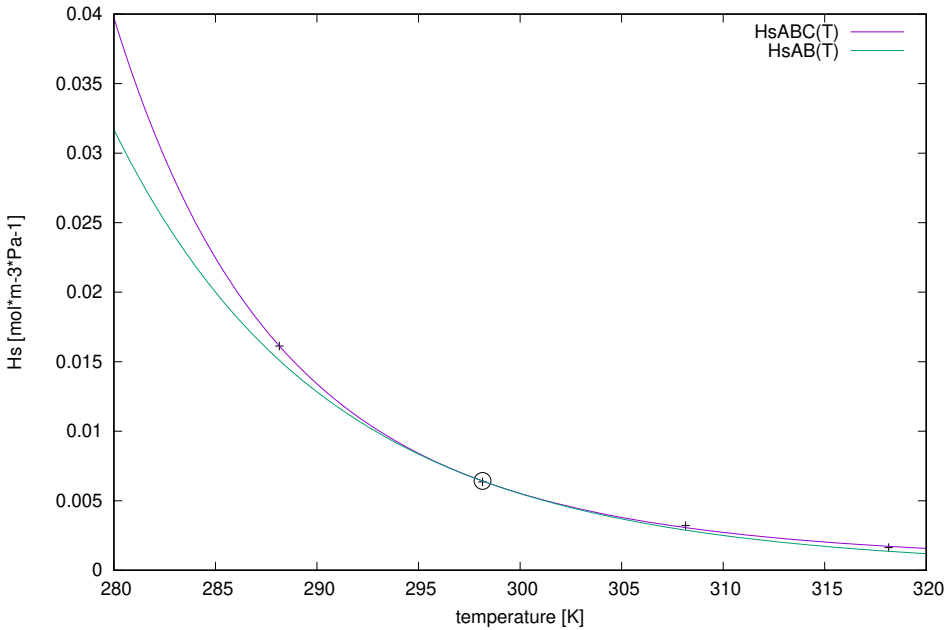



ref = 3304; chem = 2-propanethiol; casrn = 75-33-2; r2 = 0.99932

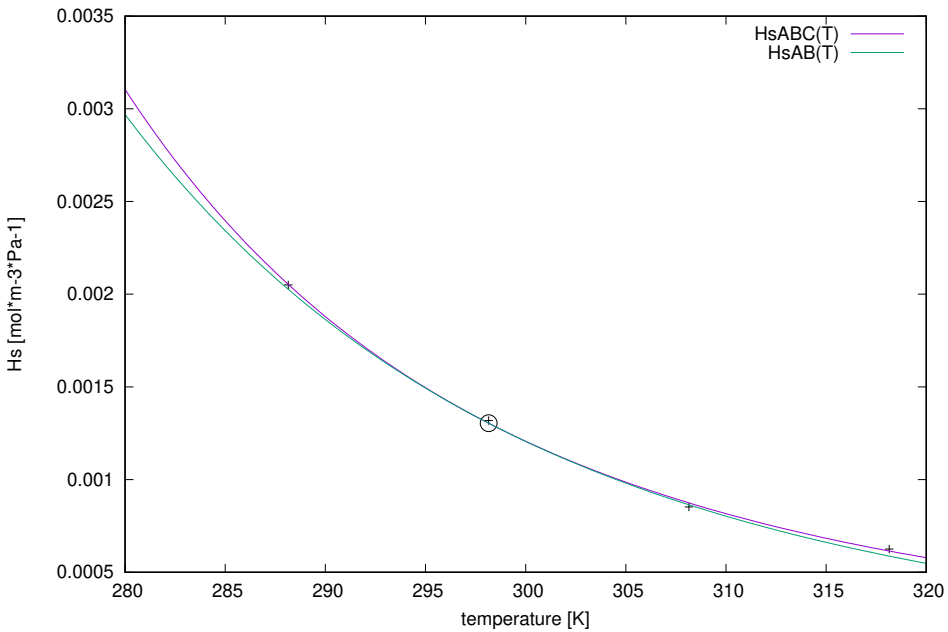

ref = 3304; chem = 2-methoxy-2-methylheptane; casrn = 76589-16-7; r2 = 0.99978

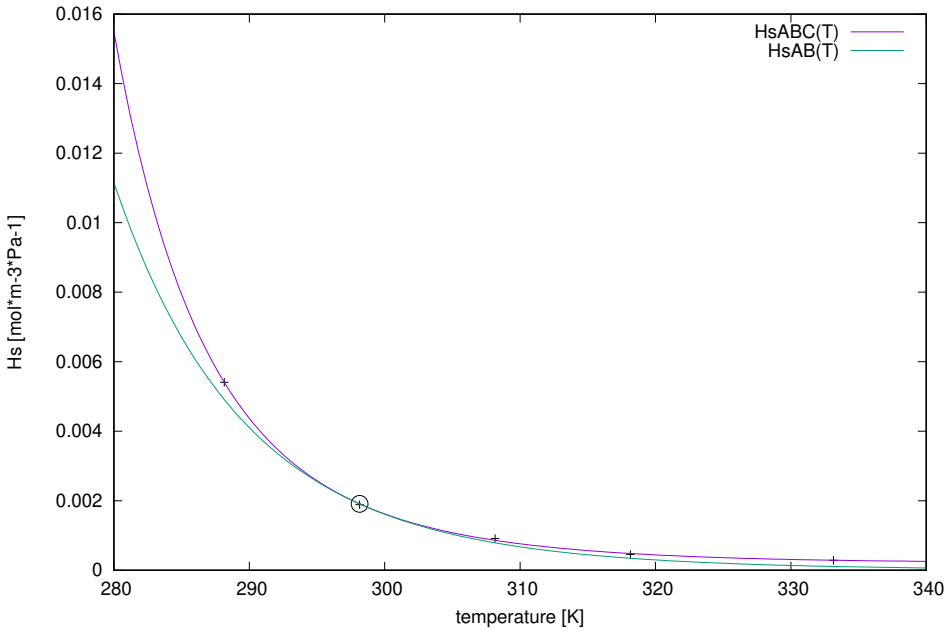

ref = 3304; chem = 2-ethoxy-2-methylbutane; casrn = 919-94-8; r2 = 0.99987

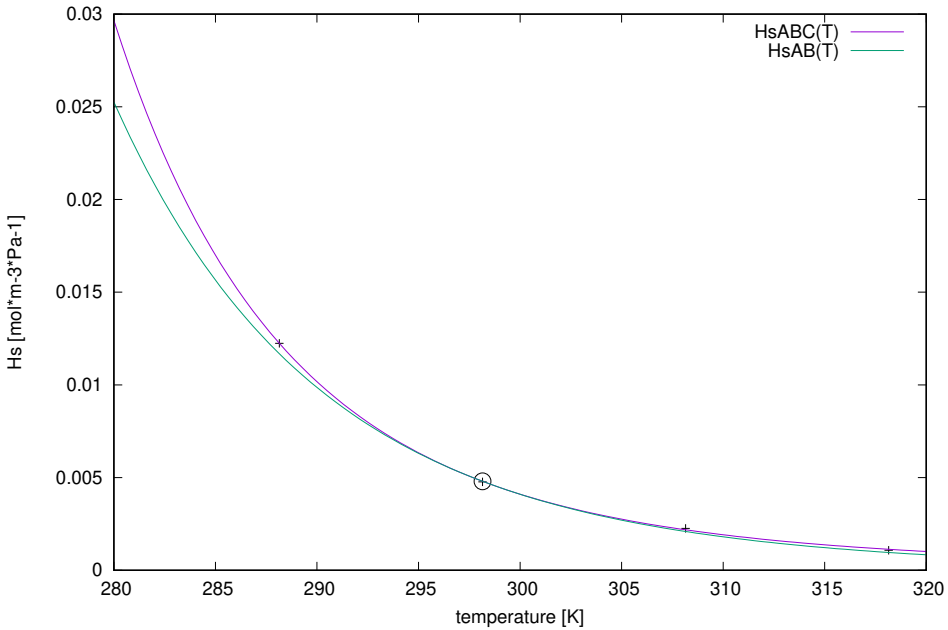

ref = 3304; chem = 2-methoxy-2-methylbutane; casrn = 994-05-8; r2 = 0.99997

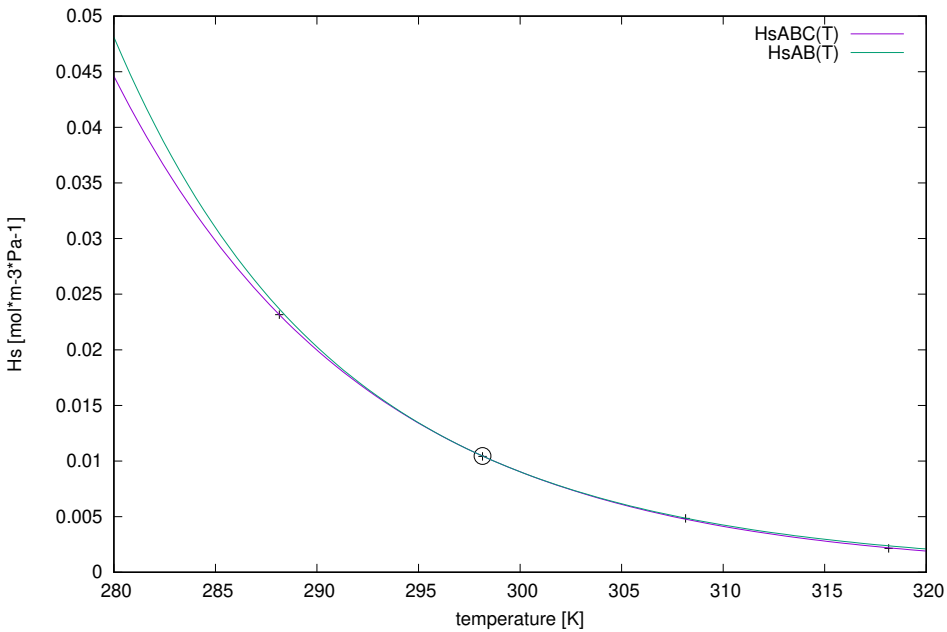

ref = 3306; chem = 2-methyl-1-propanethiol; casrn = 513-44-0; r2 = 0.99965

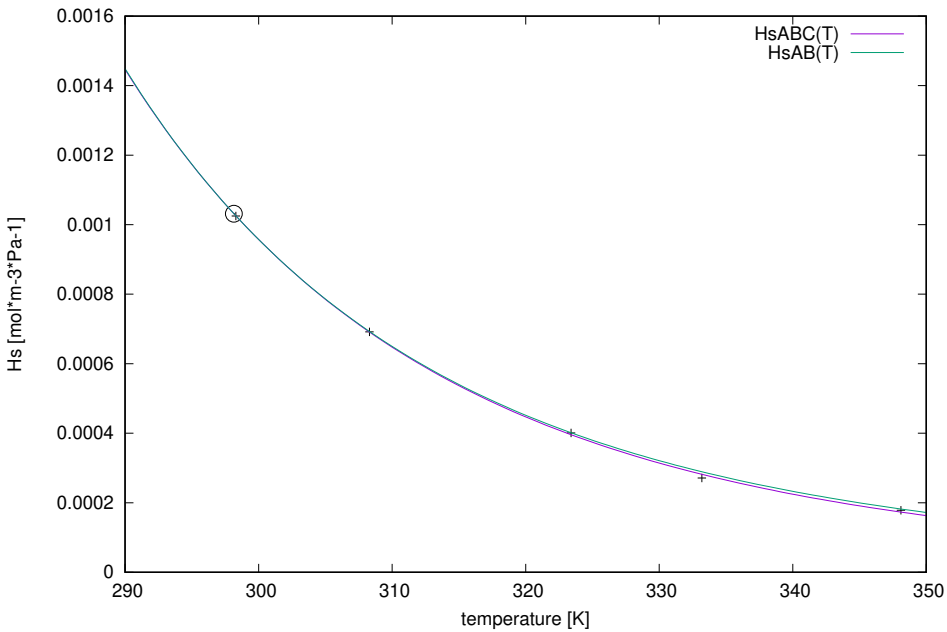

ref = 3306; chem = 2-propanethiol; casrn = 75-33-2; r2 = 0.99840

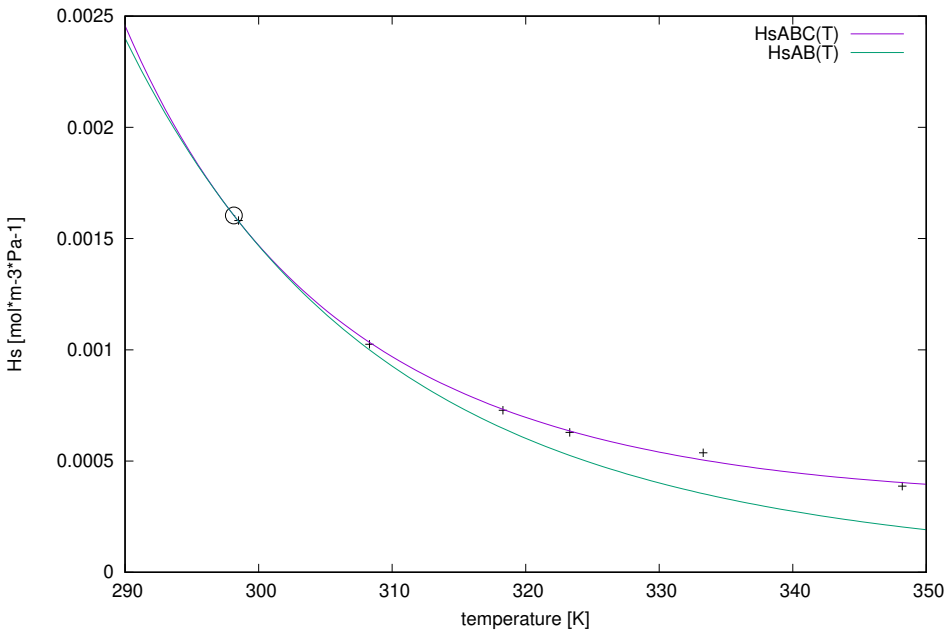

ref = 3407; chem = N2; casrn = 7727-37-9; r2 = 0.99020

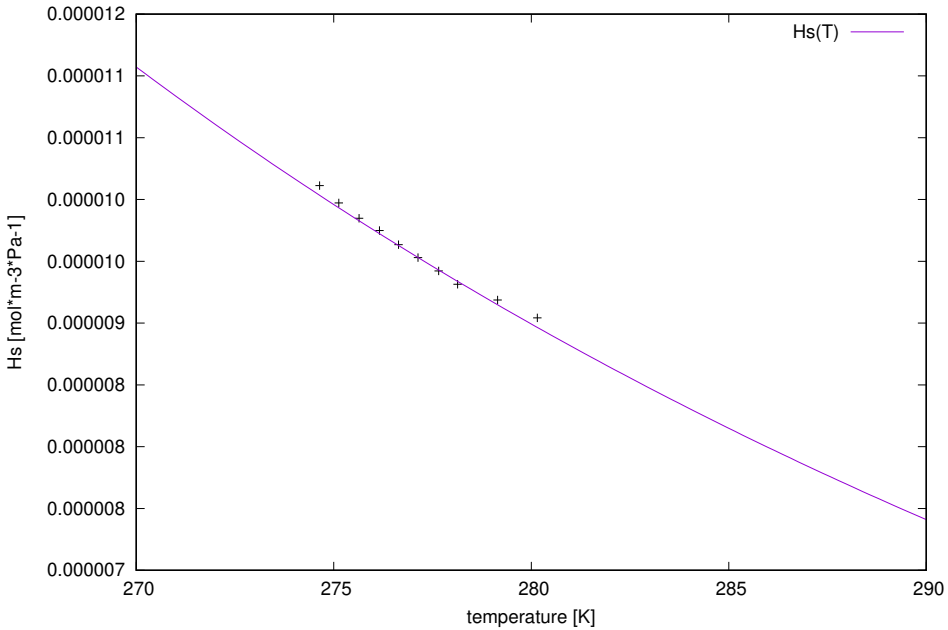

ref = 3412; chem = oxygen; casrn = 7782-44-7; r2 = 0.99999

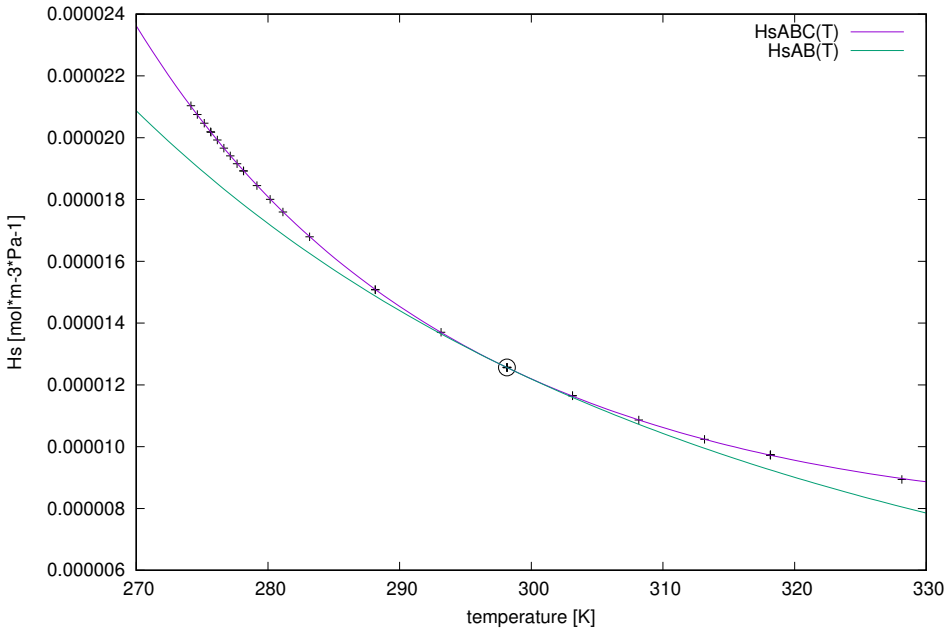



ref = 3414; chem = ozone; casrn = 10028-15-6; r2 = 0.91033

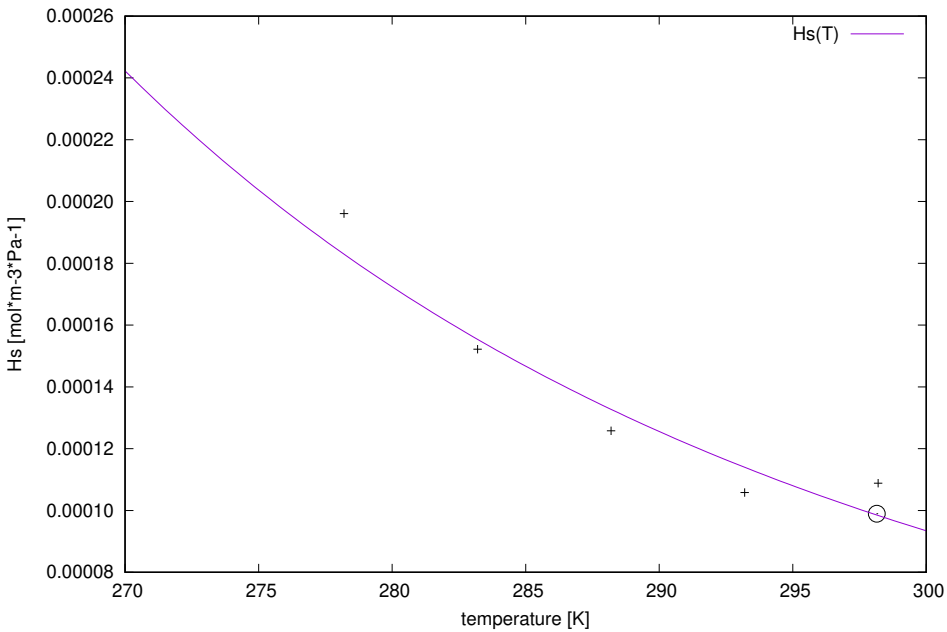

ref = 3506; chem = pyrimethanil; casrn = 53112-28-0; r2 = 0.97810

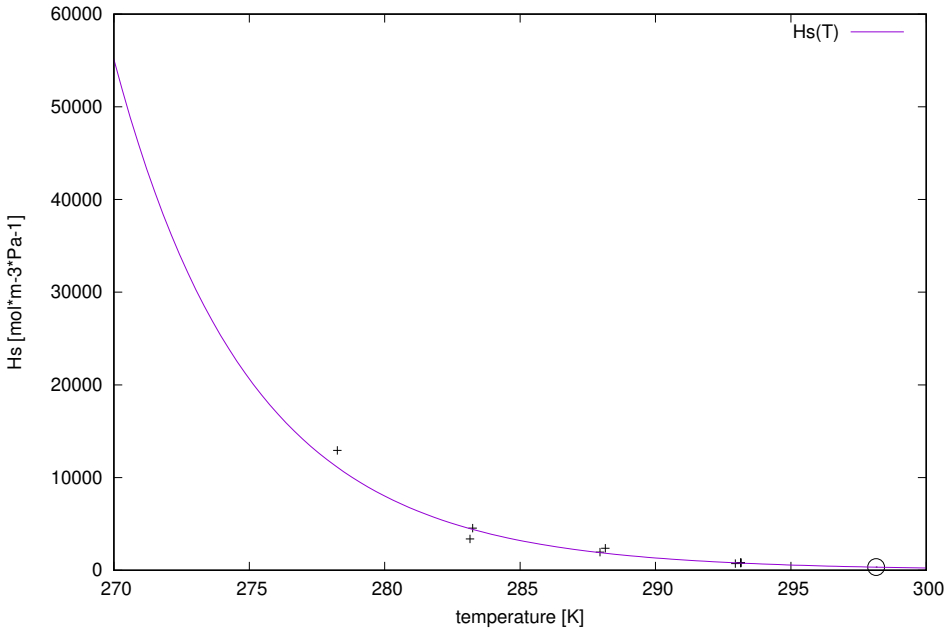

ref = 3506; chem = fenpropidin; casrn = 67306-00-7; r2 = 0.78736

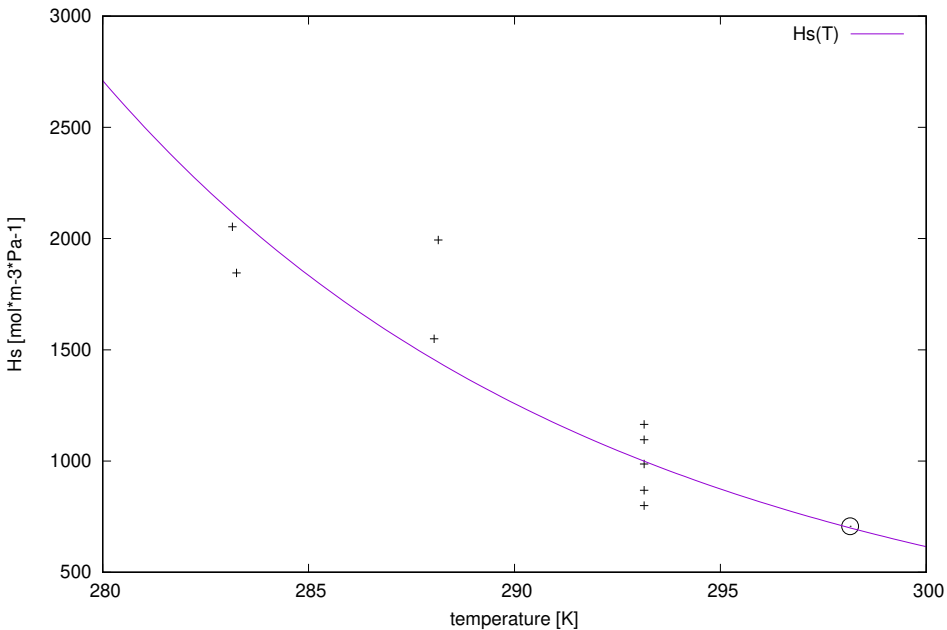

ref = 3508; chem = 3-methylbutanal; casrn = 590-86-3; r2 = 0.50907

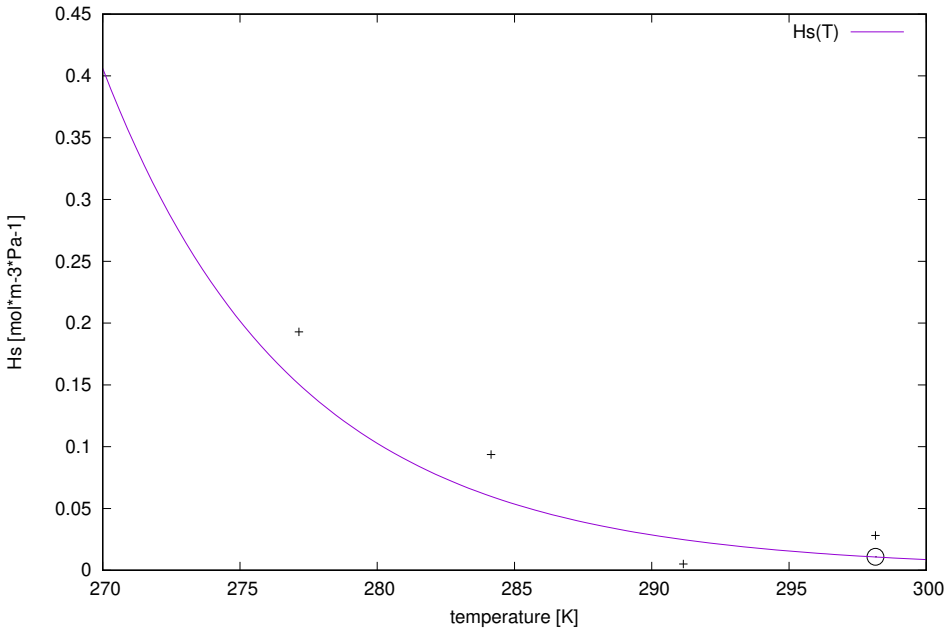

ref = 3508; chem = dimethyl disulfide; casrn = 624-92-0; r2 = 0.99847

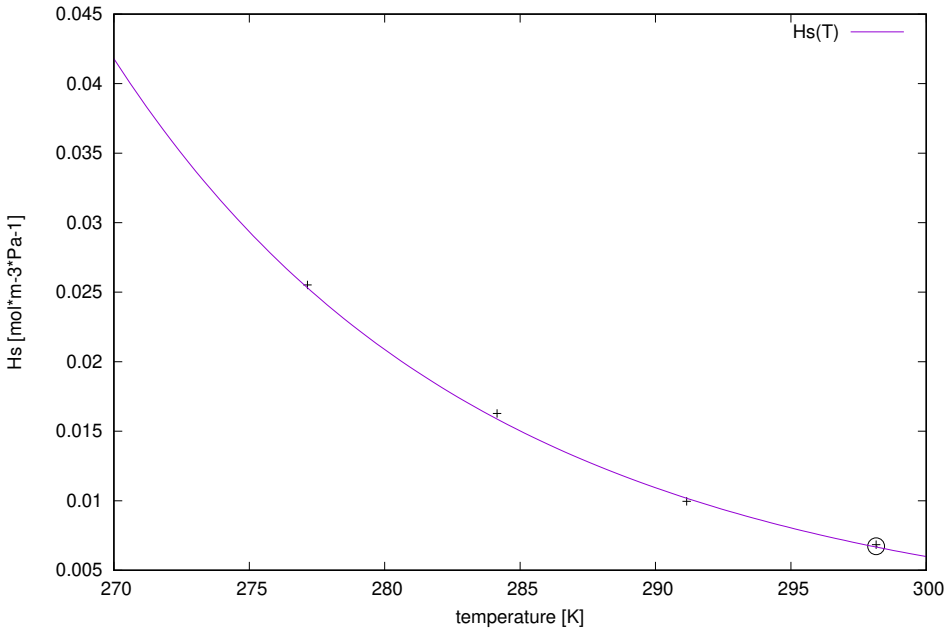

ref = 3508; chem = hexanal; casrn = 66-25-1; r2 = 0.99940

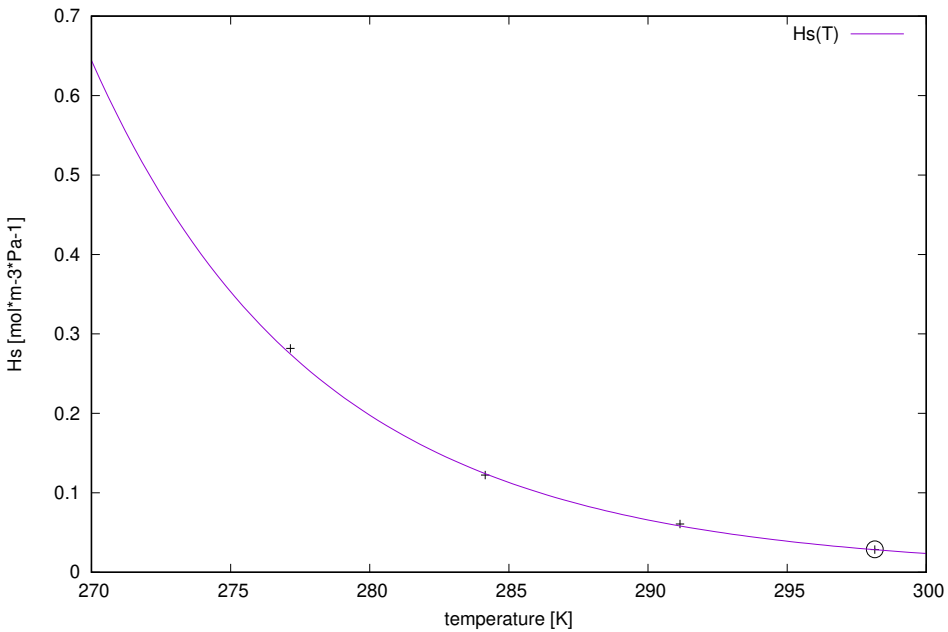

ref = 3508; chem = dimethyl sulfide; casrn = 75-18-3; r2 = 0.99989

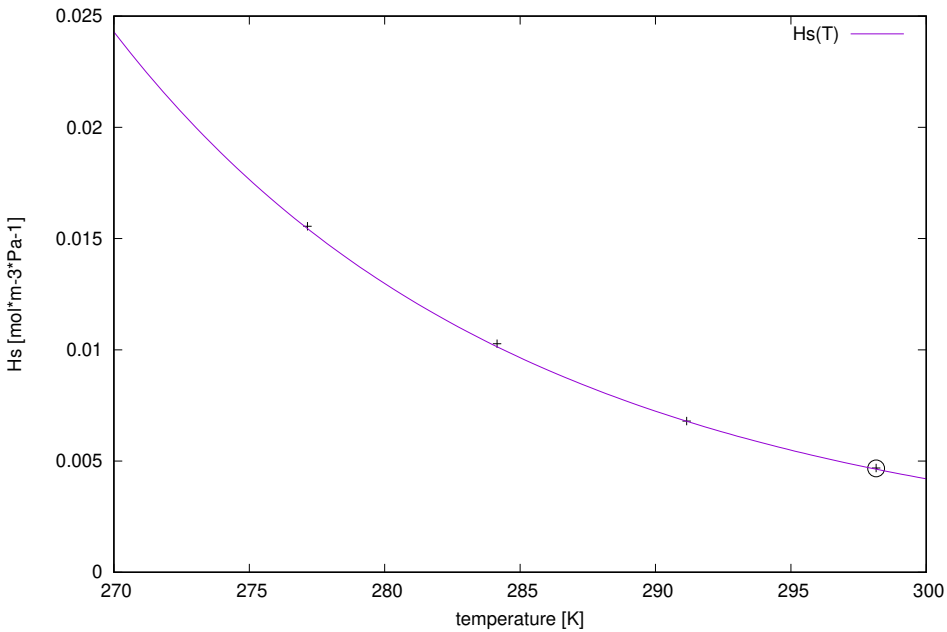

ref = 3508; chem = 2-methylpropanal; casrn = 78-84-2; r2 = 0.99970

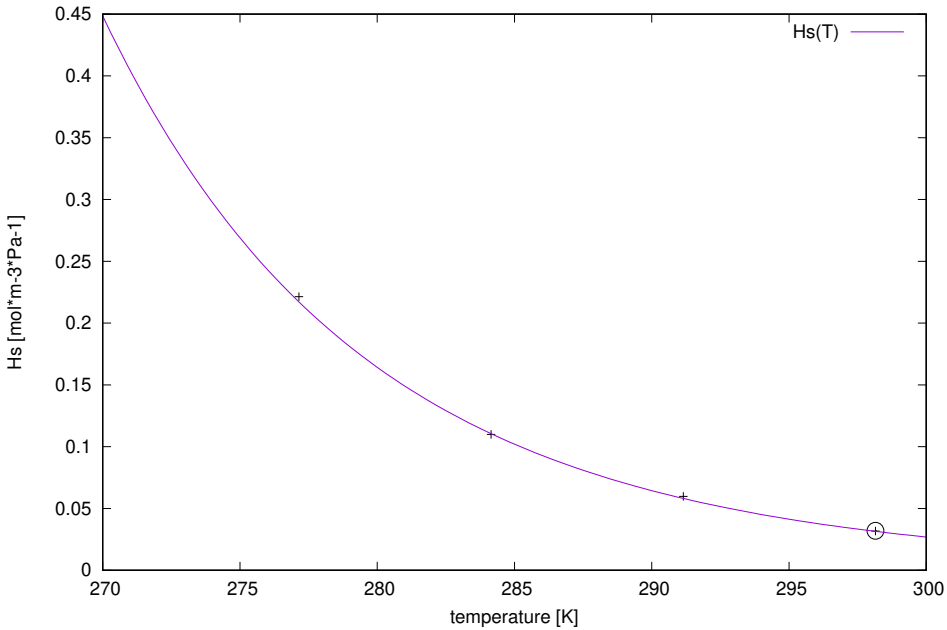



ref = 3517; chem = radon; casrn = 10043-92-2; r2 = 0.99993

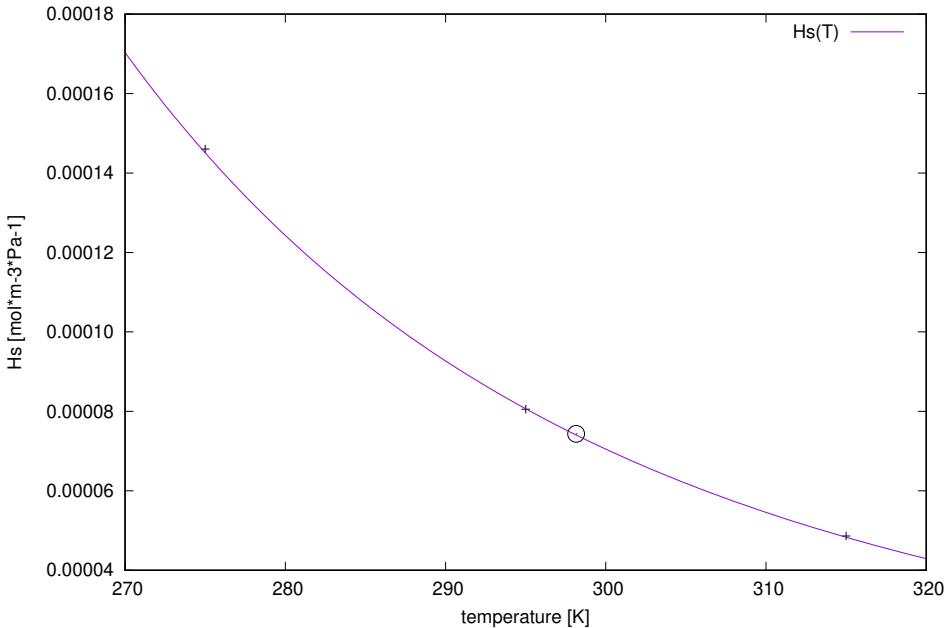

ref = 3517; chem = krypton; casrn = 7439-90-9; r2 = 0.98432

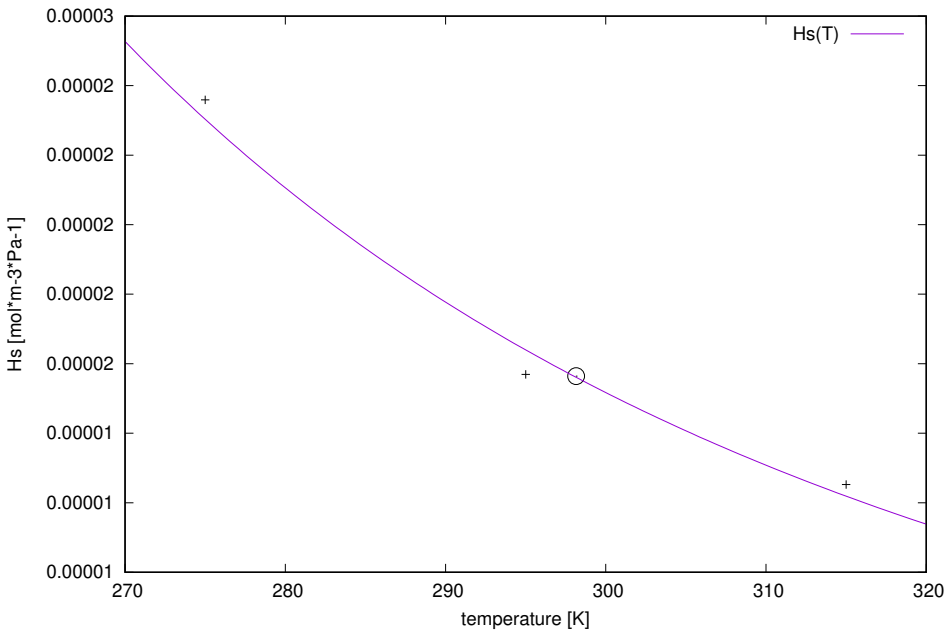

ref = 3517; chem = neon; casrn = 7440-01-9; r2 = 0.89968

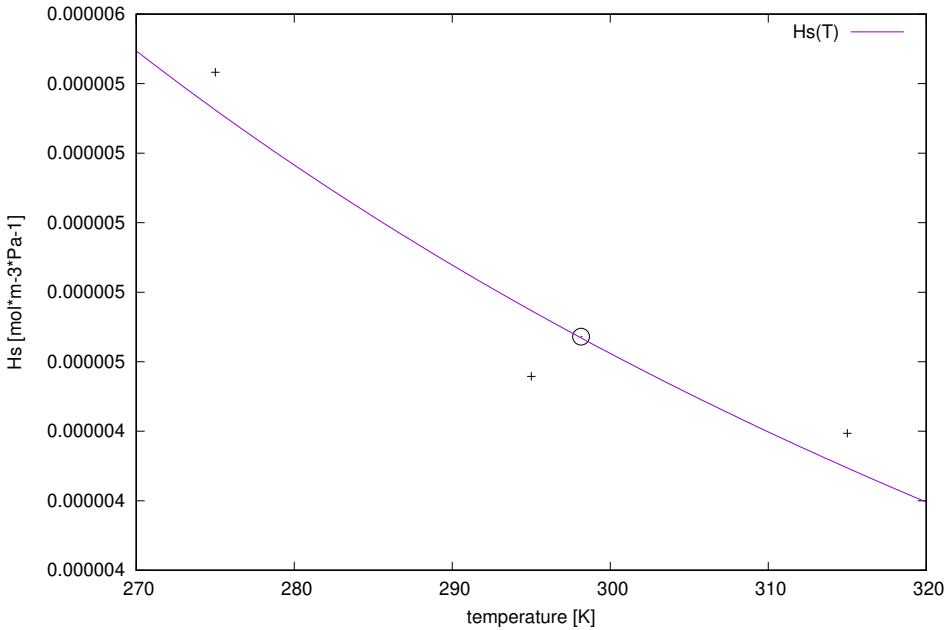

ref = 3517; chem = argon; casrn = 7440-37-1; r2 = 0.97262

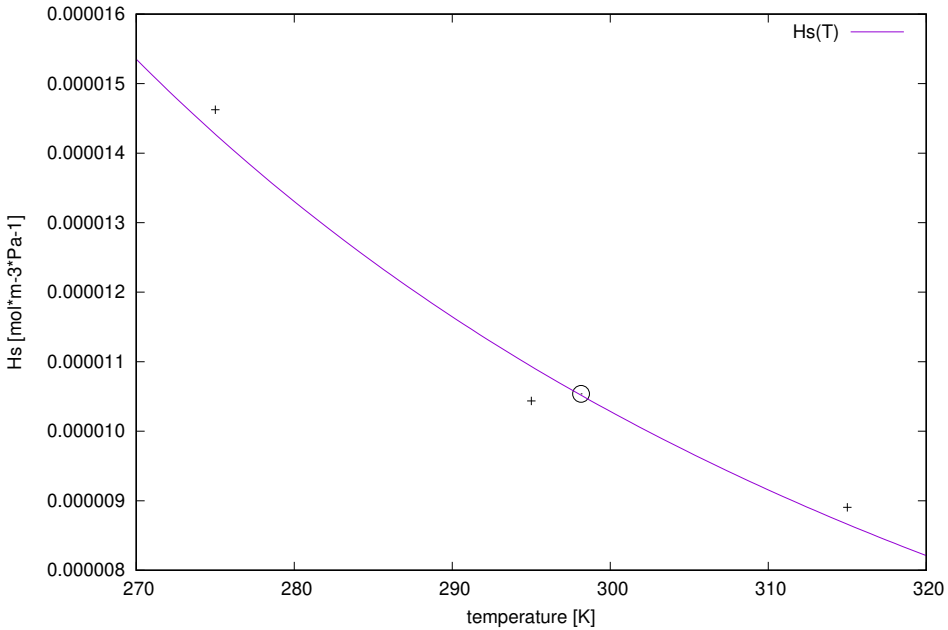

ref = 3517; chem = helium; casrn = 7440-59-7; r2 = 0.22284

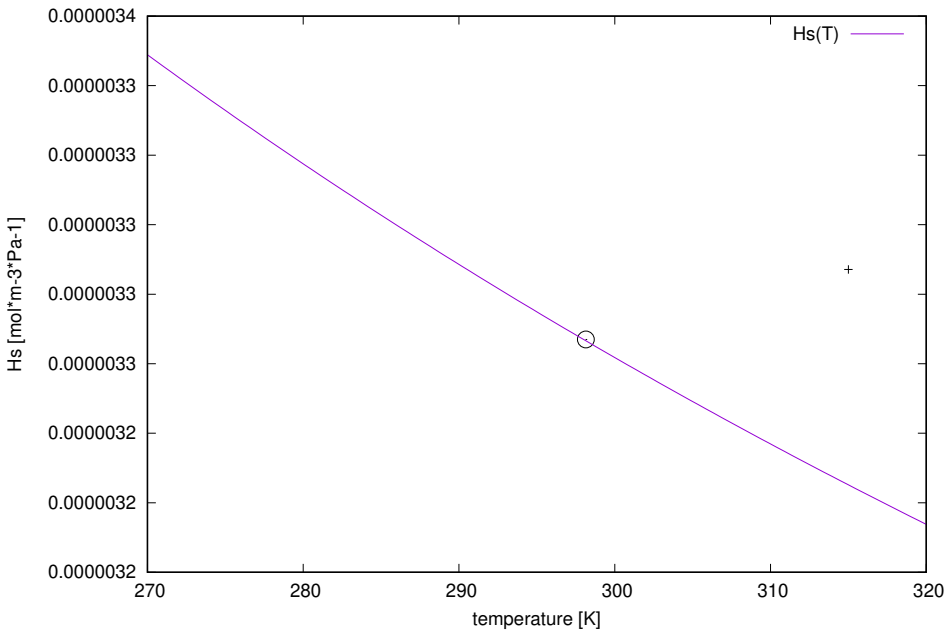

ref = 3517; chem = xenon; casrn = 7440-63-3; r2 = 0.99725

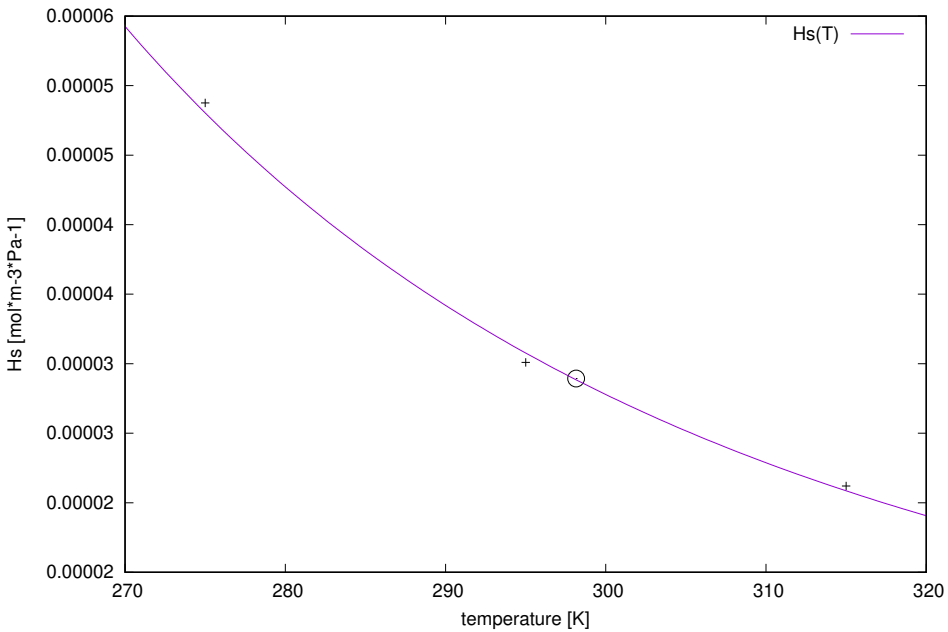

ref = 3525; chem = isocyanic acid; casrn = 75-13-8; r2 = 0.98890

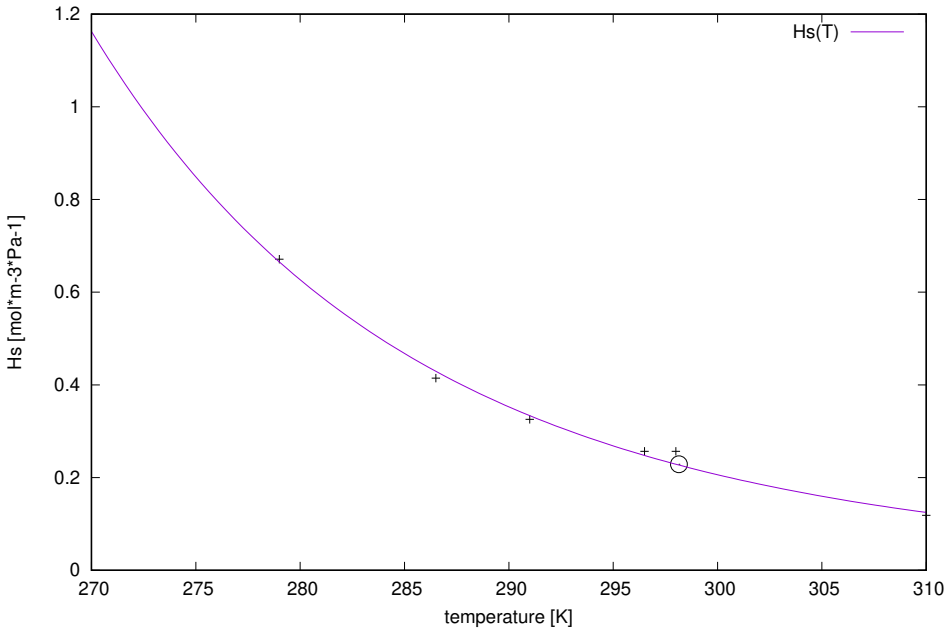

ref = 3526; chem = ethanol; casrn = 64-17-5; r2 = 0.99357

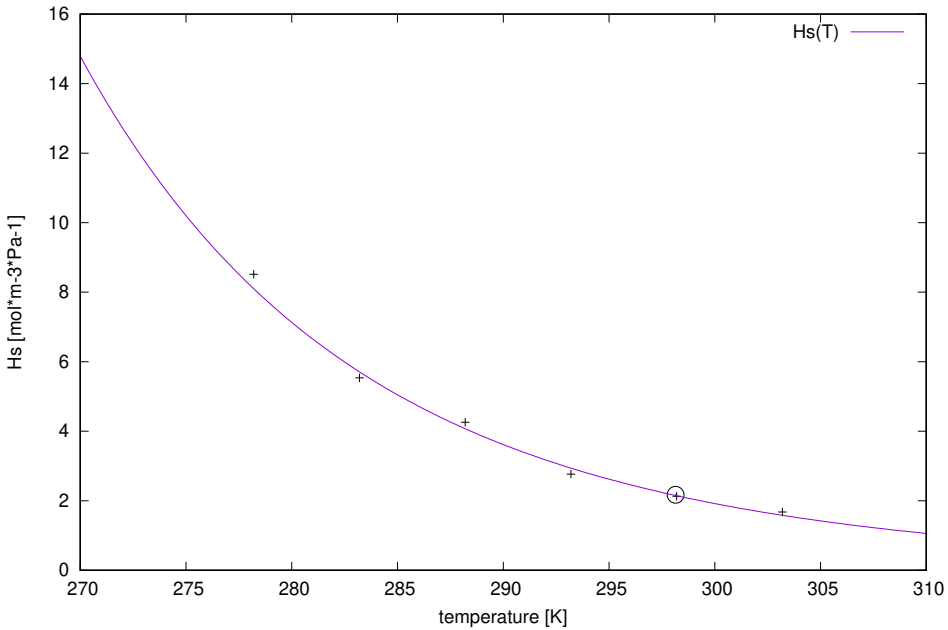



ref = 3526; chem = methanol; casrn = 67-56-1; r2 = 0.98290

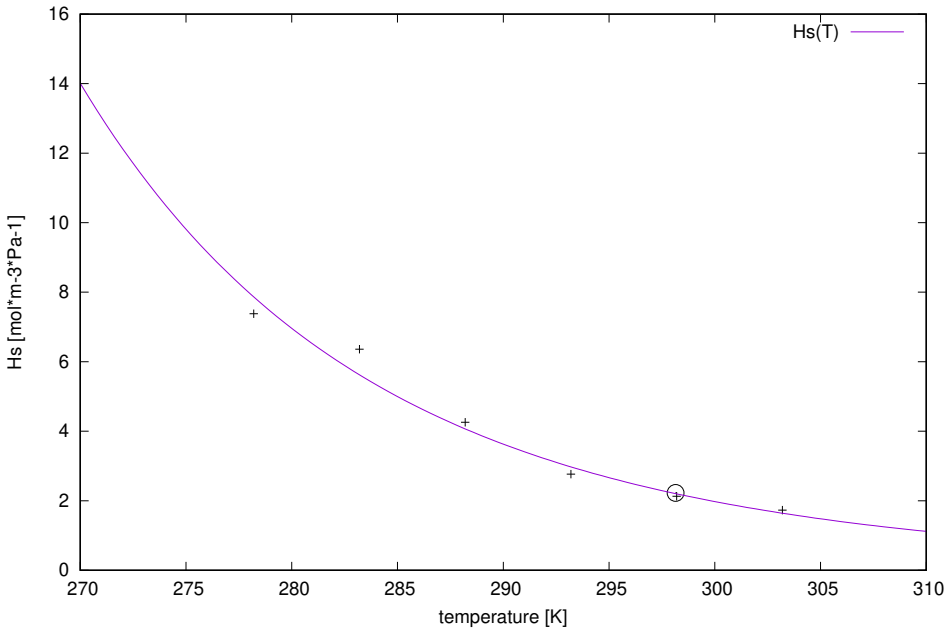

ref = 3526; chem = propanone; casrn = 67-64-1; r2 = 0.99926

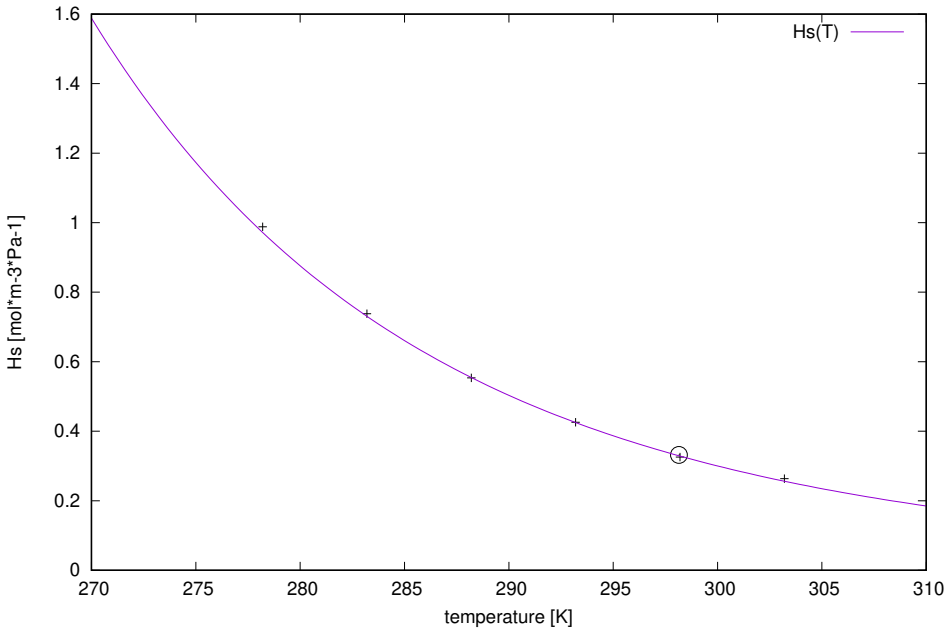

ref = 3528; chem = ethyne; casrn = 74-86-2; r2 = 0.99541

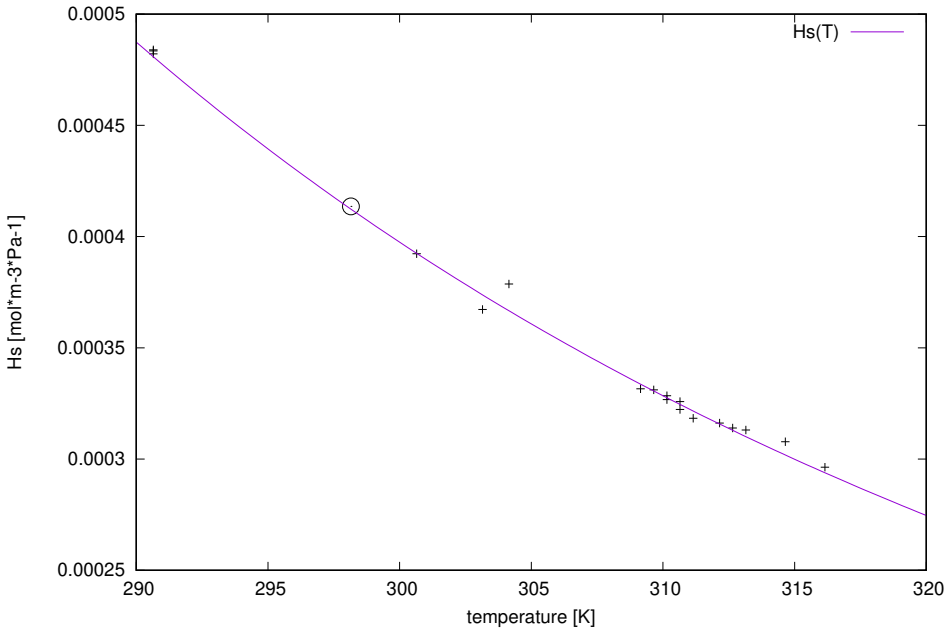

ref = 3529; chem = carbon monoxide; casrn = 630-08-0; r2 = 0.99998

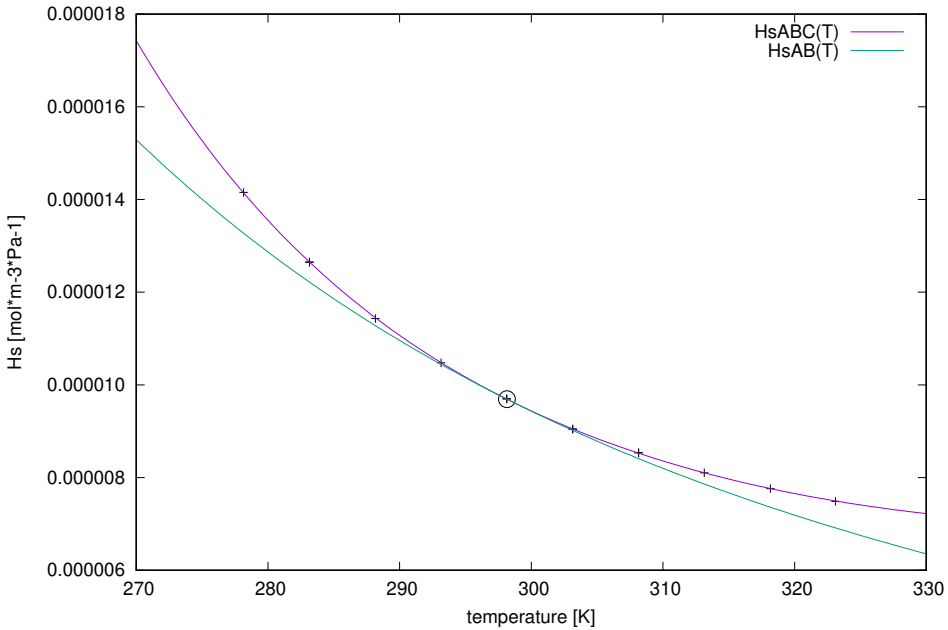

ref = 3534; chem = hydrogen sulfide; casrn = 7783-06-4; r2 = 1.00000

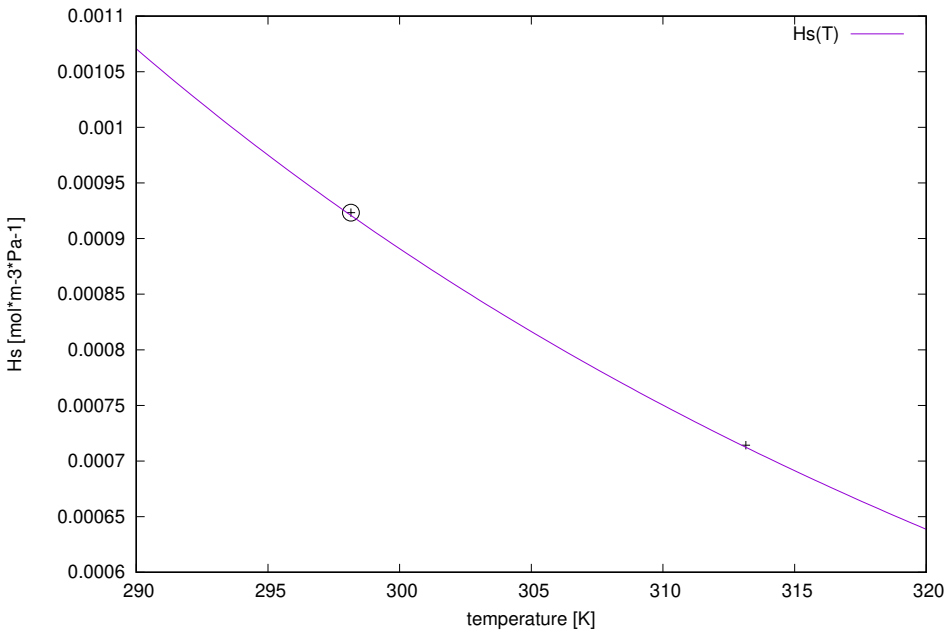

ref = 3535; chem = chlorine (molecular); casrn = 7782-50-5; r2 = 0.99971

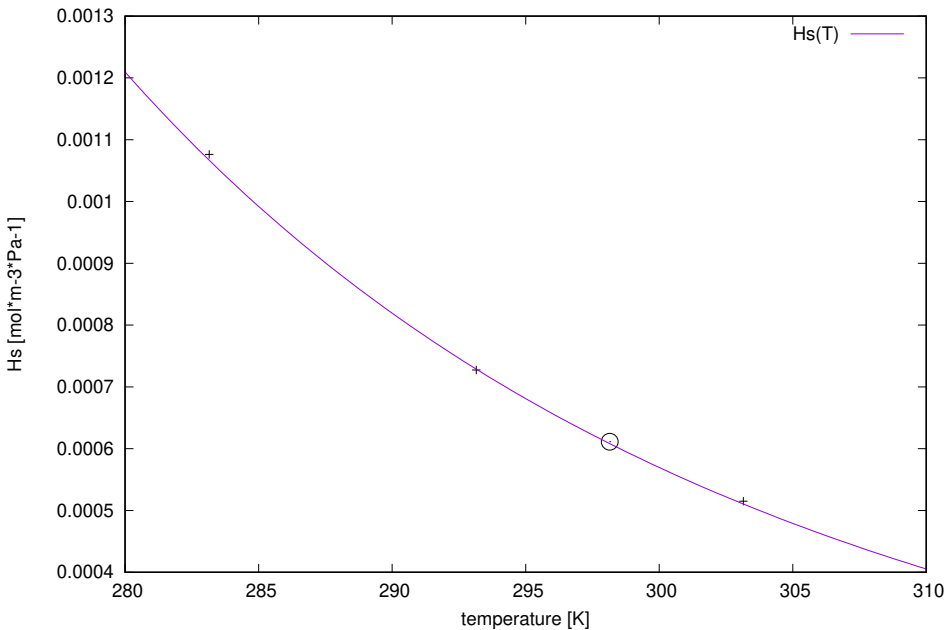

ref = 3541; chem = chlorine (molecular); casrn = 7782-50-5; r2 = 0.99886

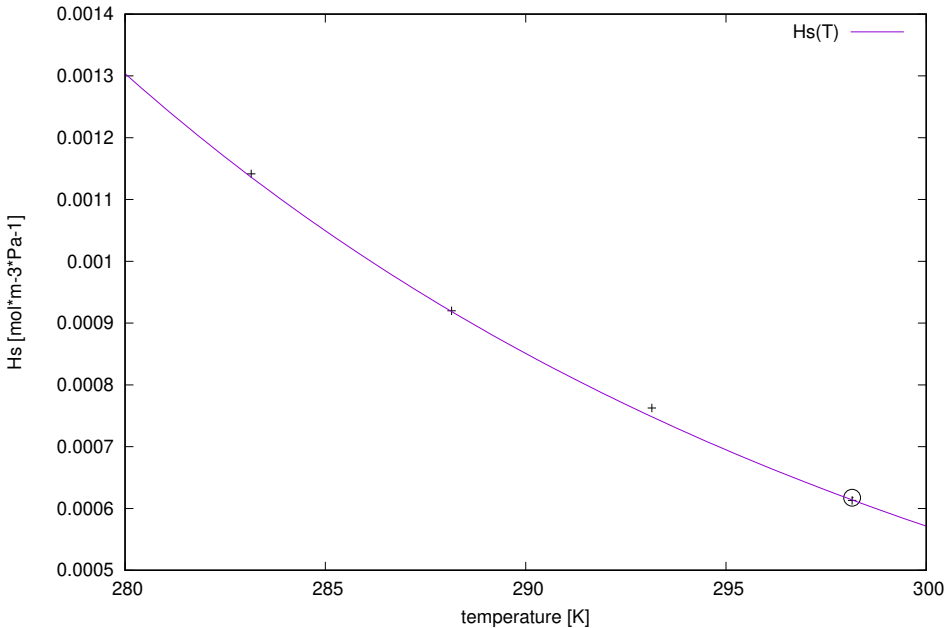

ref = 3545; chem = radon; casrn = 10043-92-2; r2 = 0.99150

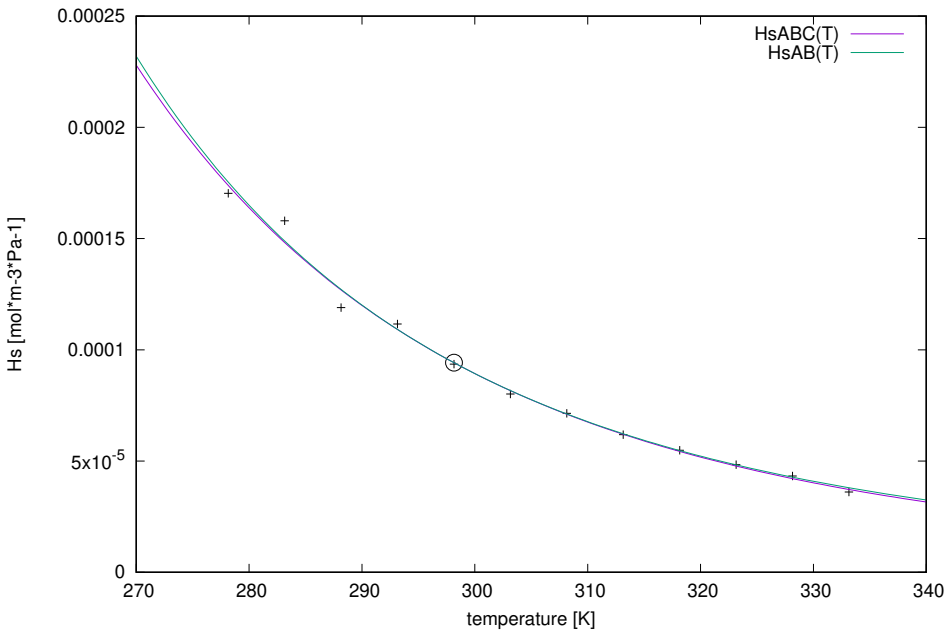



ref = 3546; chem = radon; casrn = 10043-92-2; r2 = 0.99812

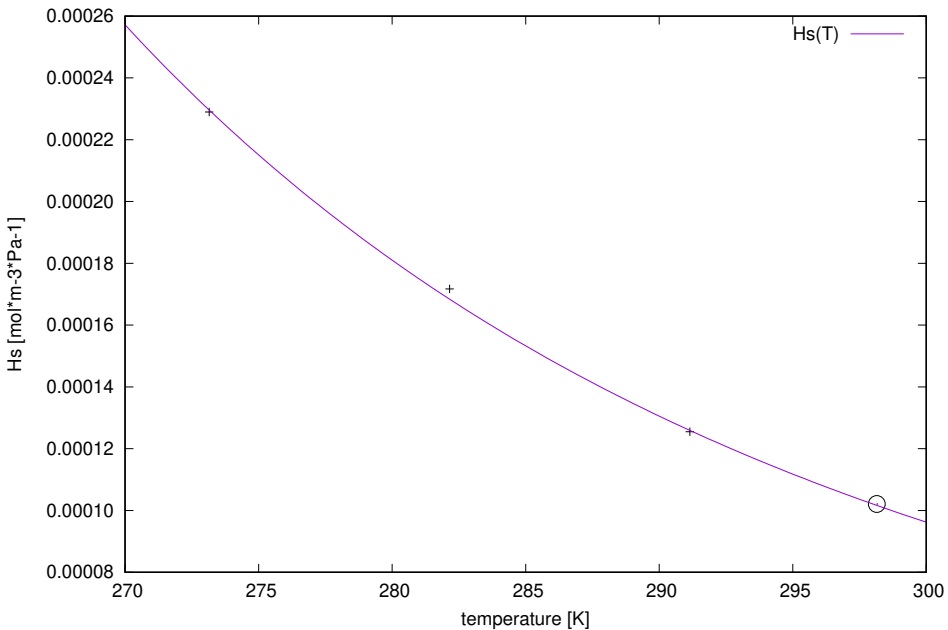

ref = 3547; chem = argon; casrn = 7440-37-1; r2 = 0.99314

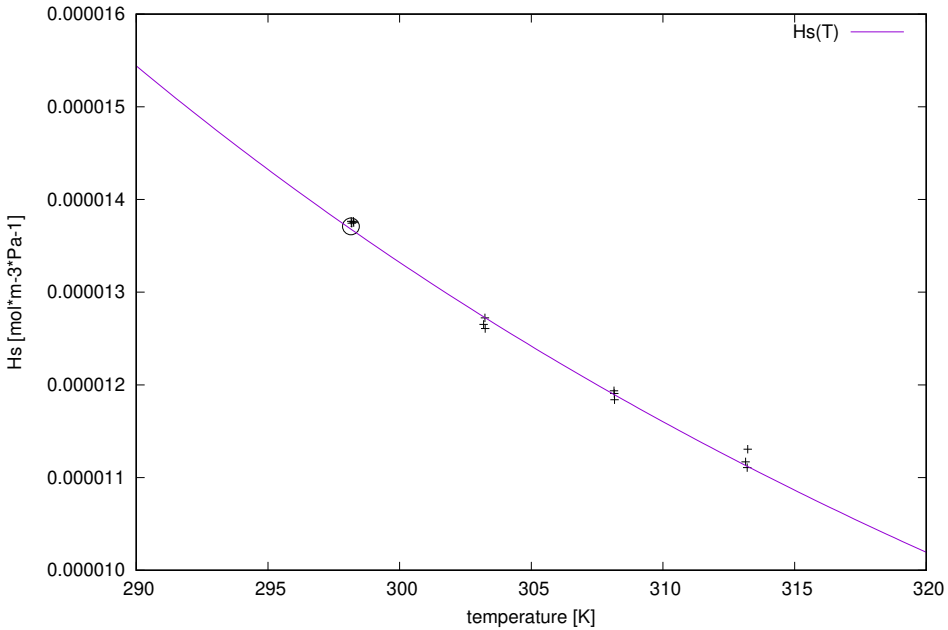

ref = 3548; chem = helium; casrn = 7440-59-7; r2 = 0.91807

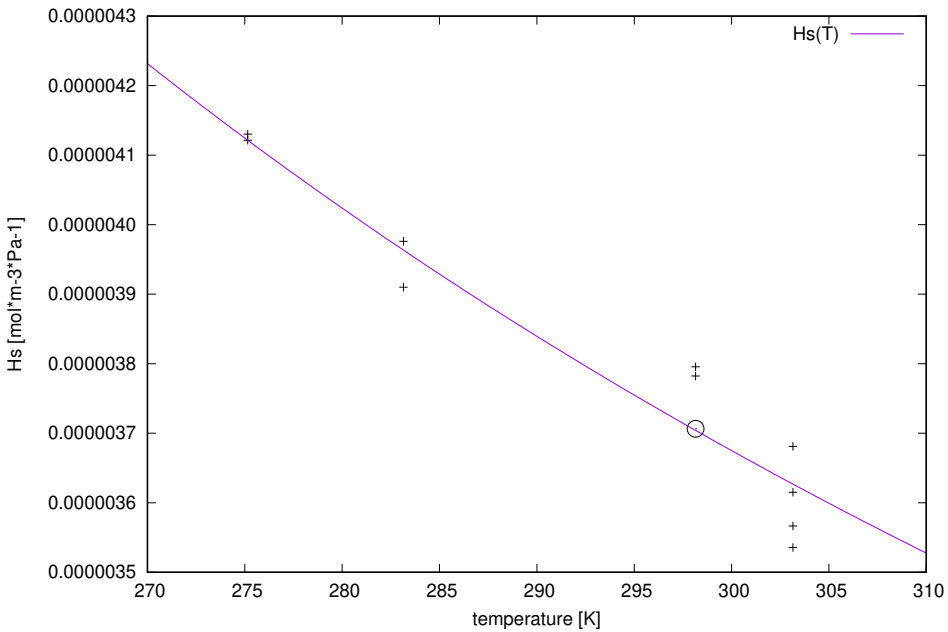

ref = 3556; chem = ethanethiol; casrn = 75-08-1; r2 = 0.99962

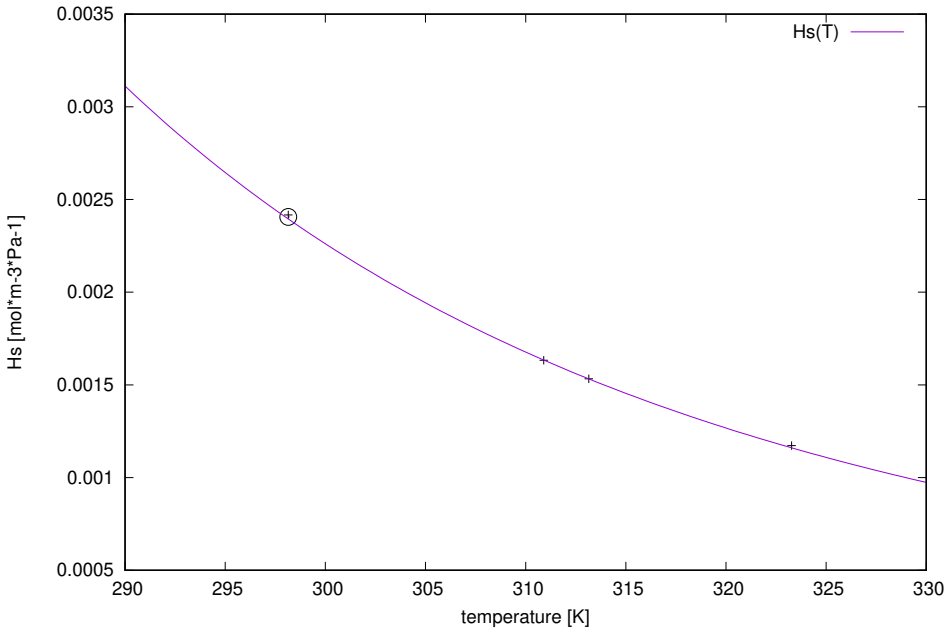

ref = 3565; chem = nitrogen; casrn = 7727-37-9; r2 = 0.99994

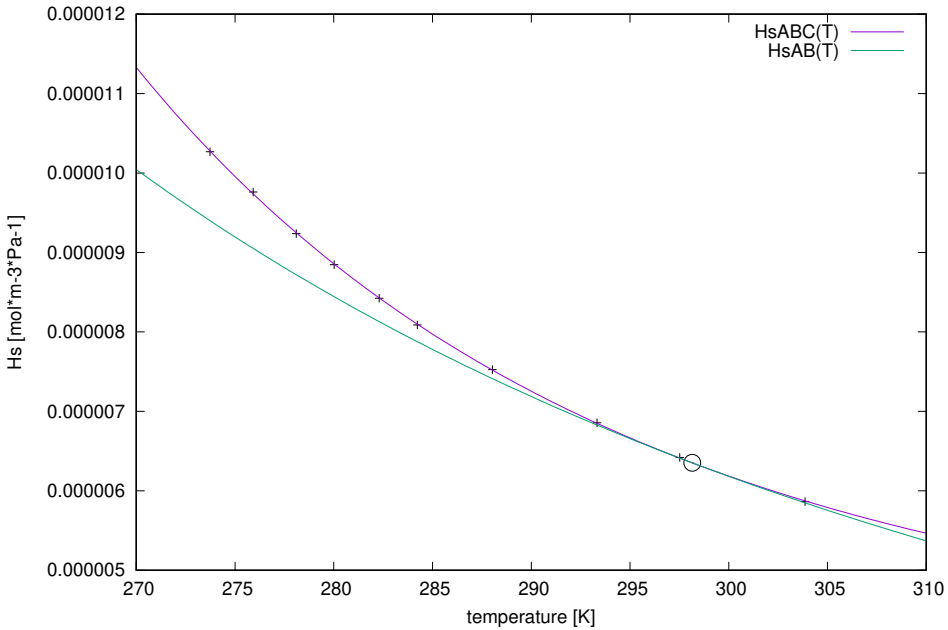

ref = 3566; chem = oxygen; casrn = 7782-44-7; r2 = 0.99991

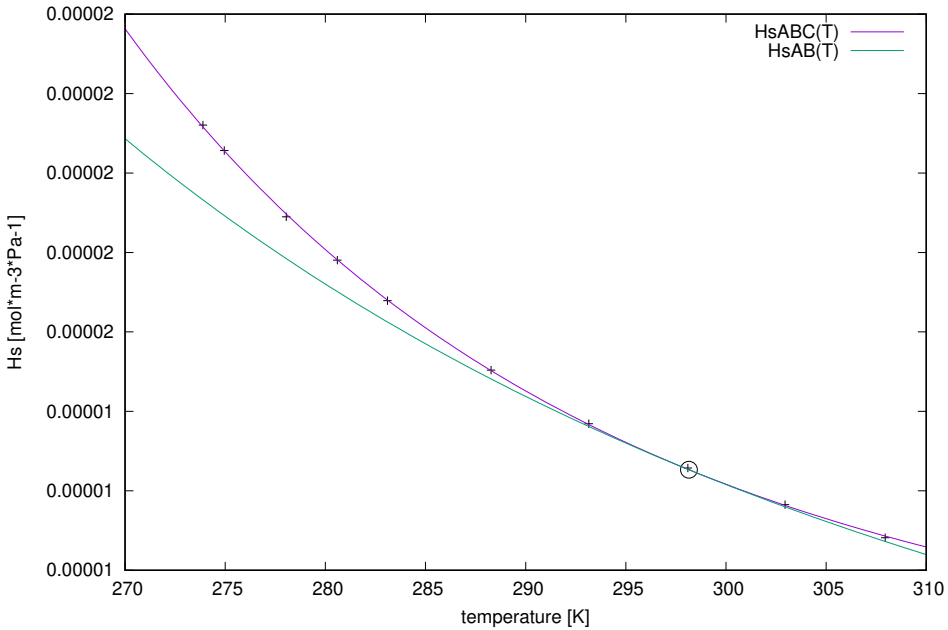

ref = 3567; chem = argon; casrn = 7440-37-1; r2 = 0.99877

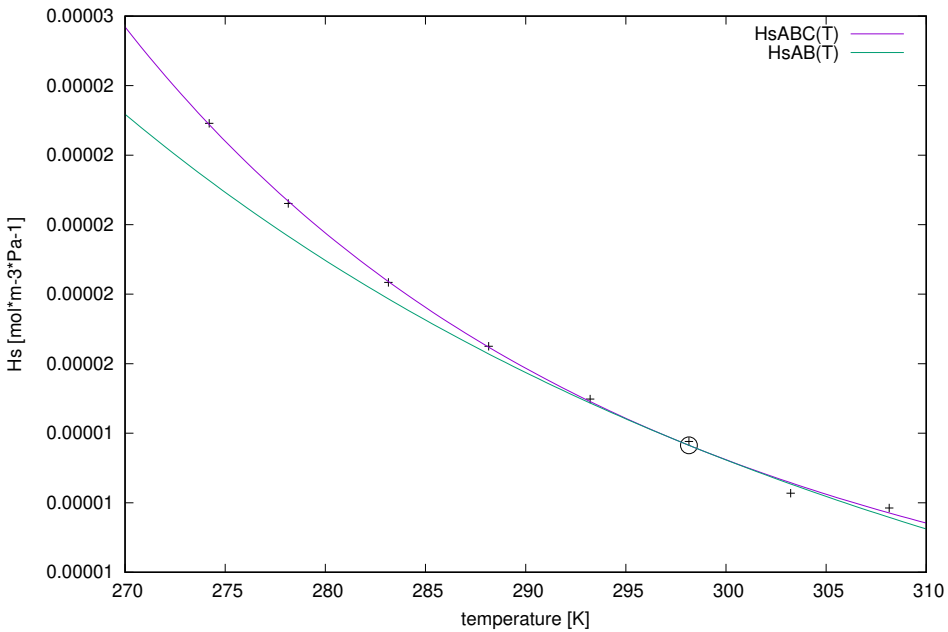

ref = 3568; chem = carbon dioxide; casrn = 124-38-9; r2 = 0.99997

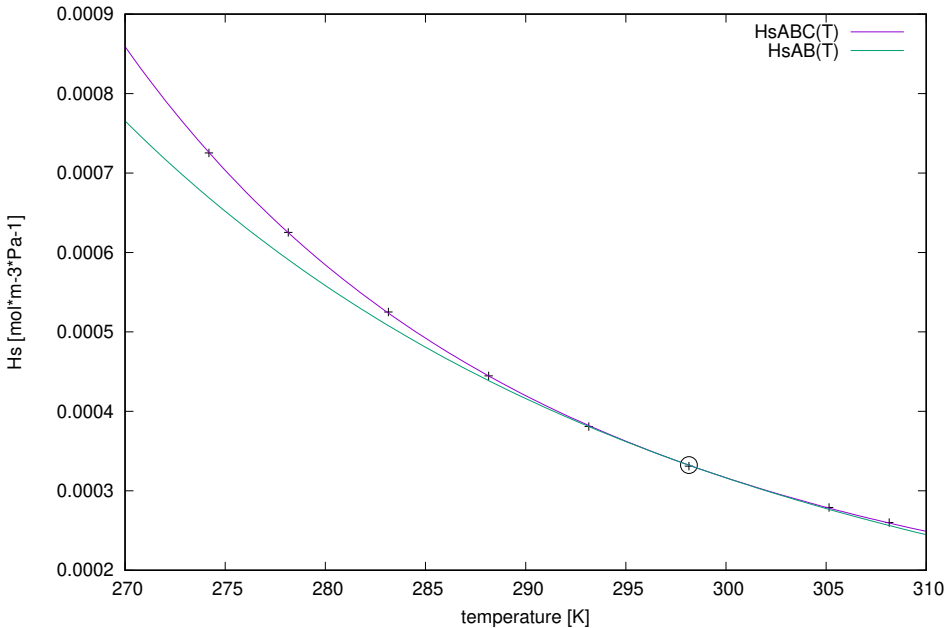



ref = 3569; chem = methane; casrn = 74-82-8; r2 = 1.00000

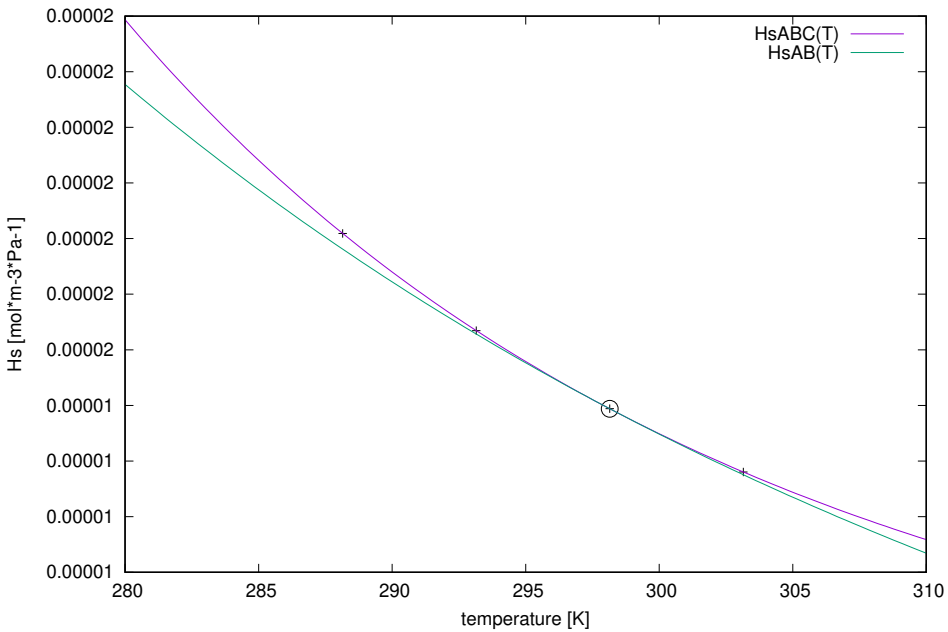

ref = 3569; chem = dichlorodifluoromethane; casrn = 75-71-8; r2 = 0.99933



ref = 3569; chem = chlorotrifluoromethane; casrn = 75-72-9; r2 = 0.99955



ref = 3569; chem = tetrafluoromethane; casrn = 75-73-0; r2 = 0.99892



ref = 3571; chem = tetrachloromethane; casrn = 56-23-5; r2 = 0.99920

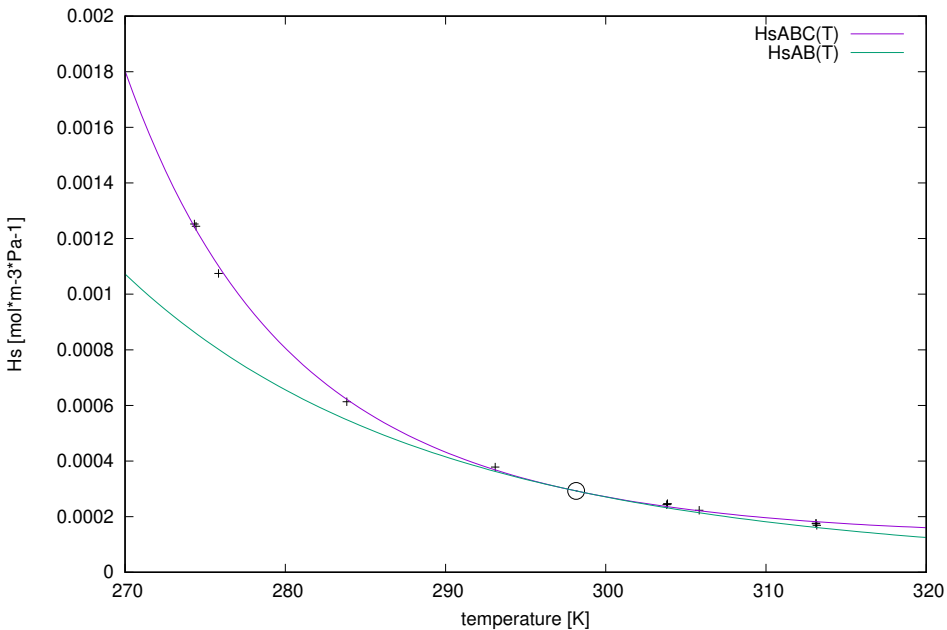

ref = 3573; chem = bromomethane; casrn = 74-83-9; r2 = 0.99655

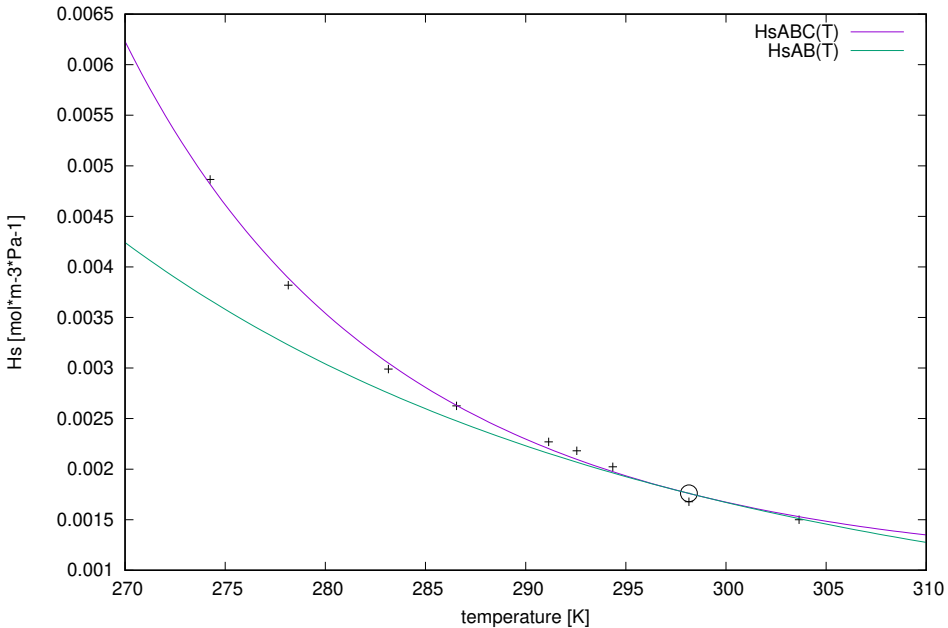

ref = 3578; chem = ISOPDOOH; casrn = ; r2 = 1.00000

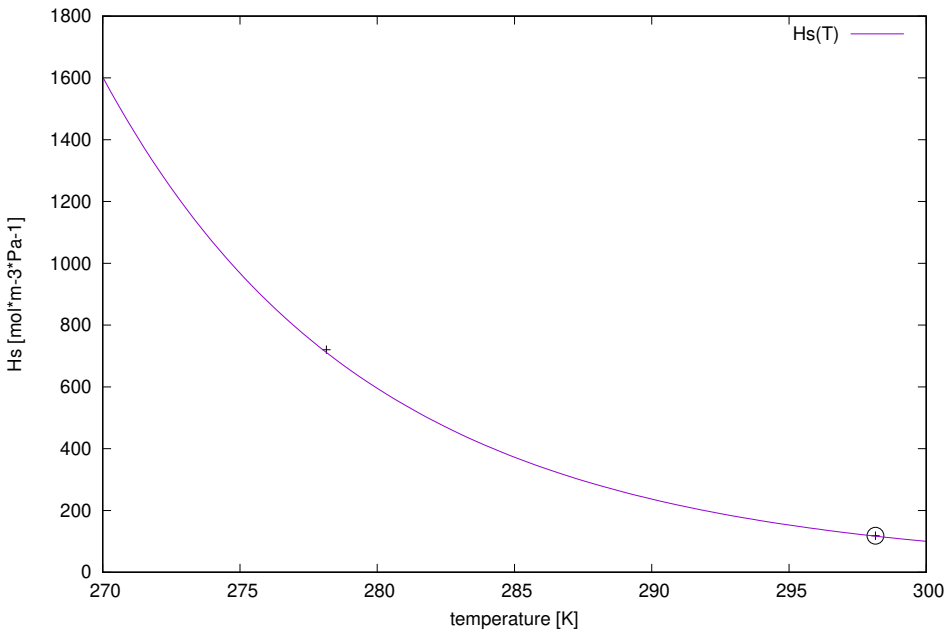

ref = 3578; chem = H2O2; casrn = ; r2 = 1.00000

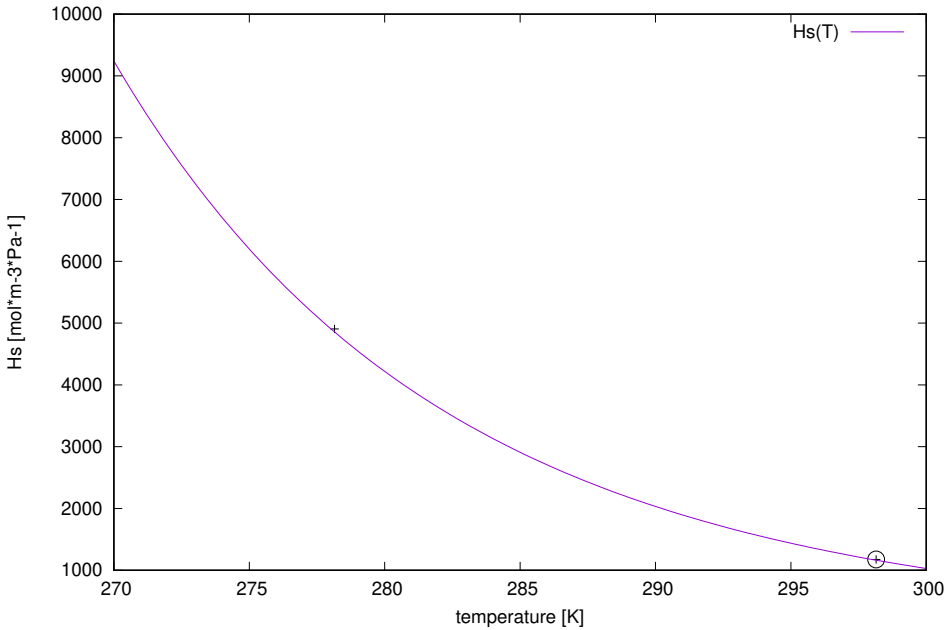



ref = 3578; chem = ISOPBOOH; casrn = ; r2 = 1.00000

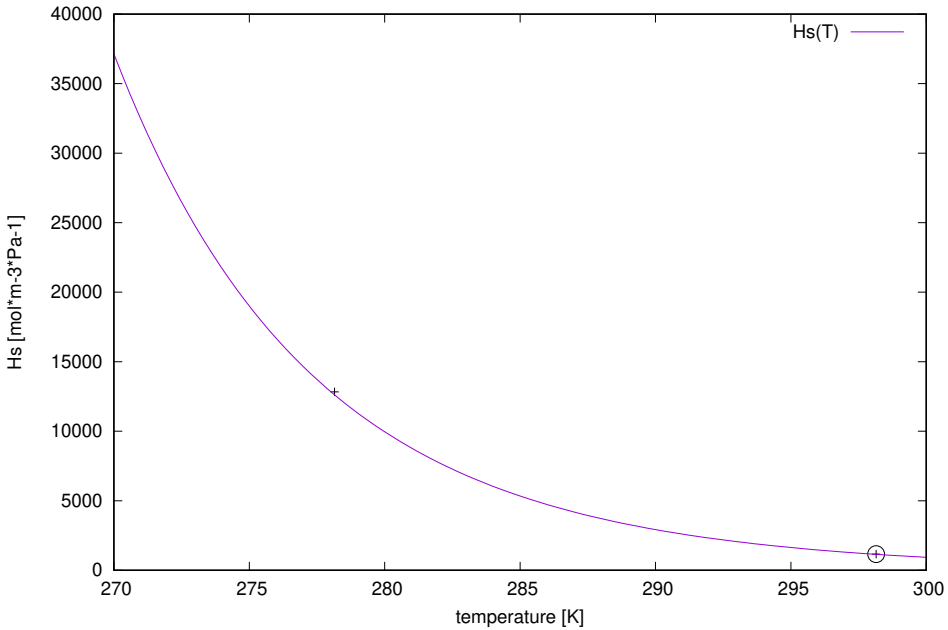

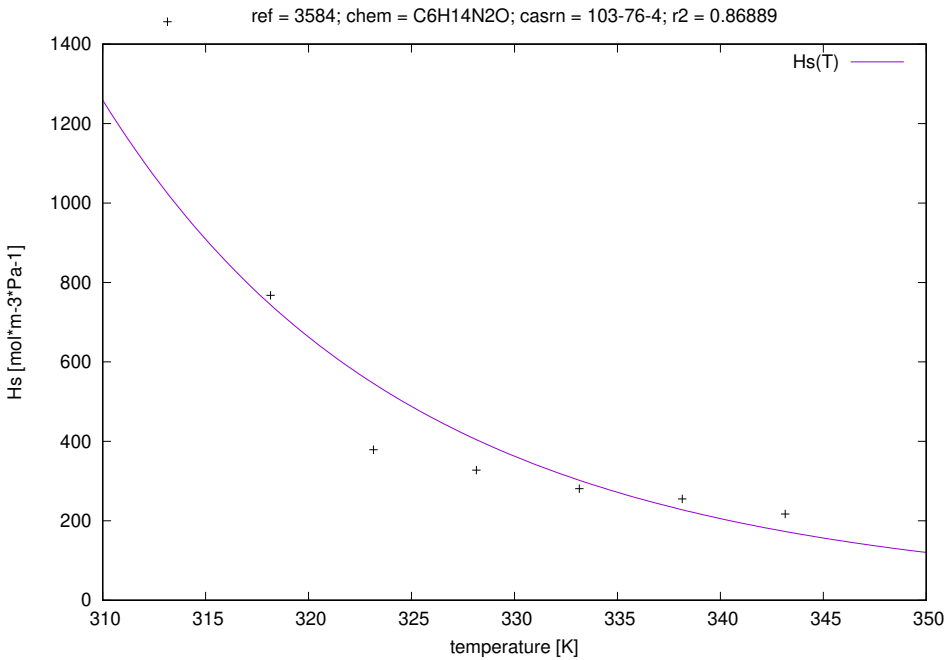

ref = 3584; chem = N-methyl-diethanolamine; casrn = 105-59-9; r2 = 0.94301

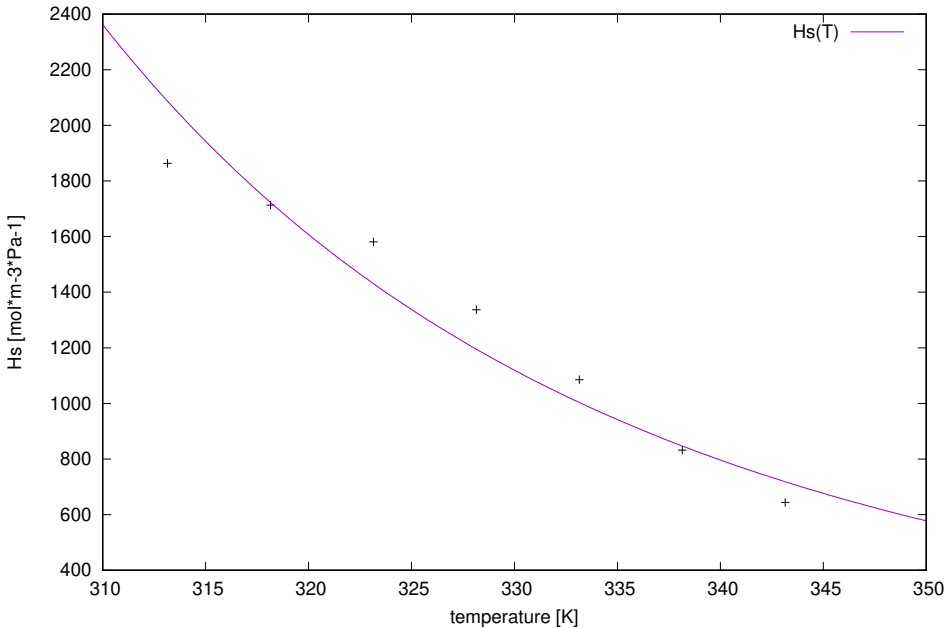

ref = 3584; chem = N,N'-dimethylpiperazine; casrn = 106-58-1; r2 = 0.99941

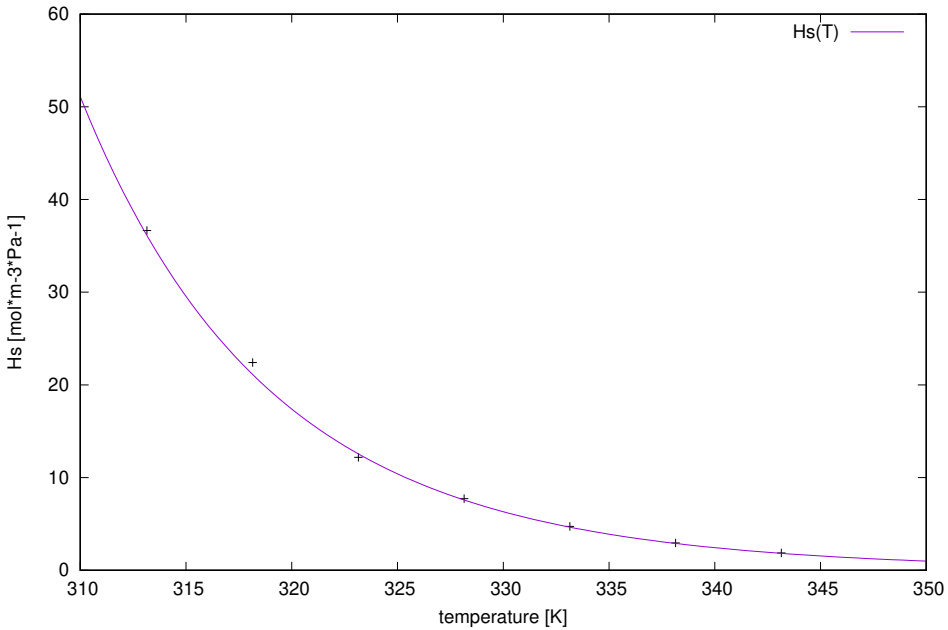

ref = 3584; chem = ethylenediamine; casrn = 107-15-3; r2 = 0.98809

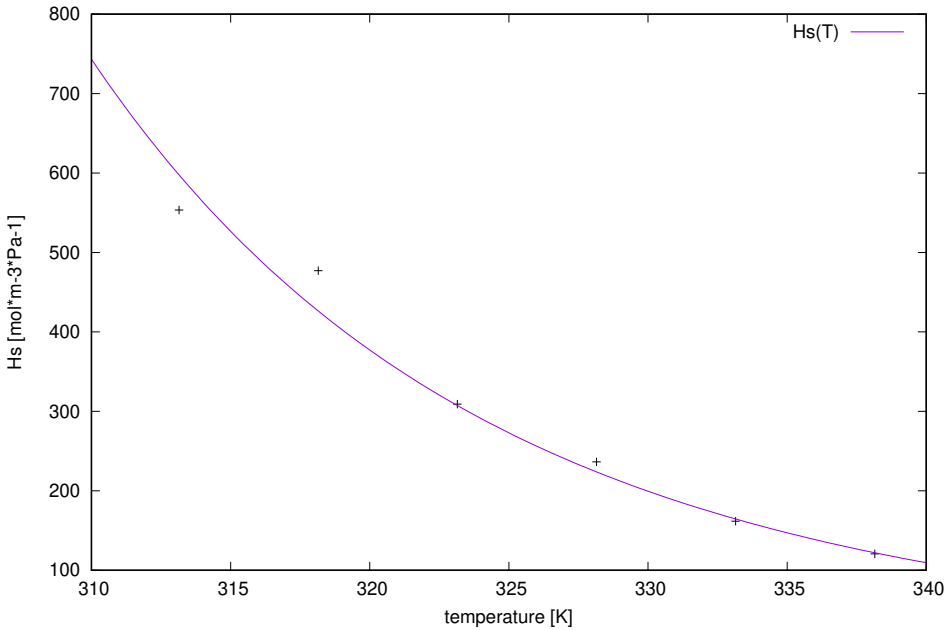

ref = 3584; chem = C4H11NO; casrn = 108-01-0; r2 = 0.99972

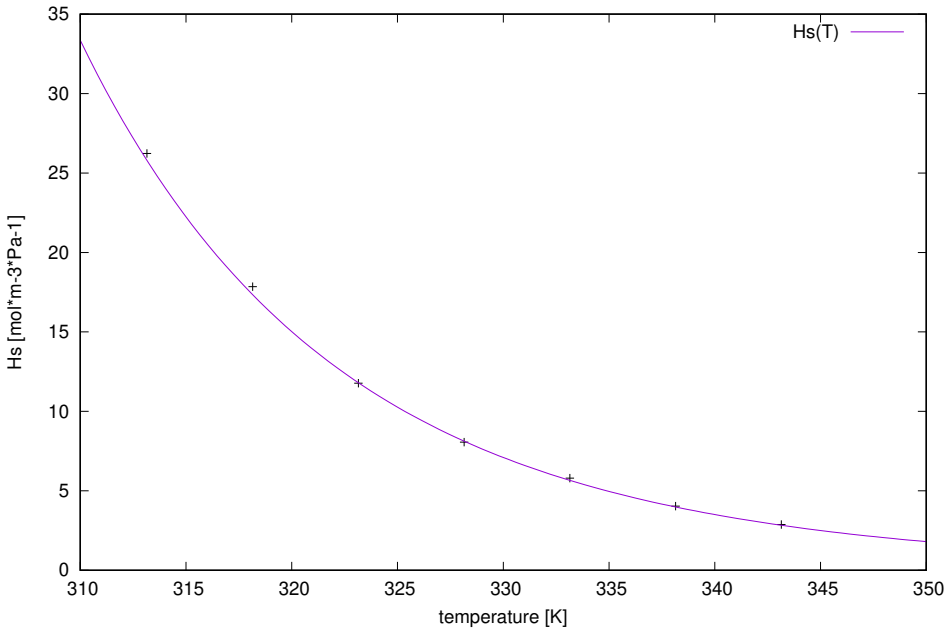

ref = 3584; chem = N-methylpiperazine; casrn = 109-01-3; r2 = 0.99788

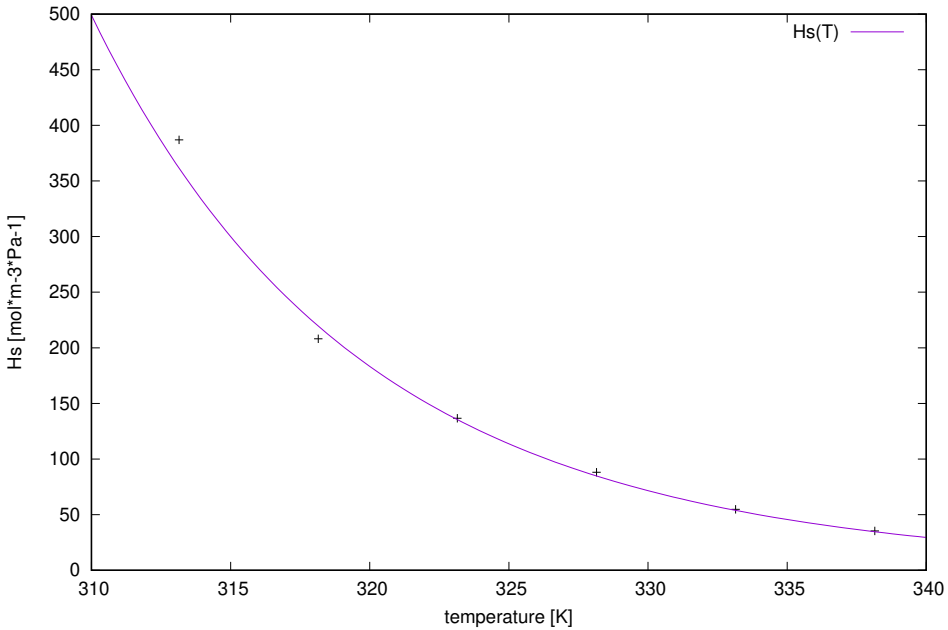

ref = 3584; chem = C5H12N2; casrn = 109-07-9; r2 = 0.99733

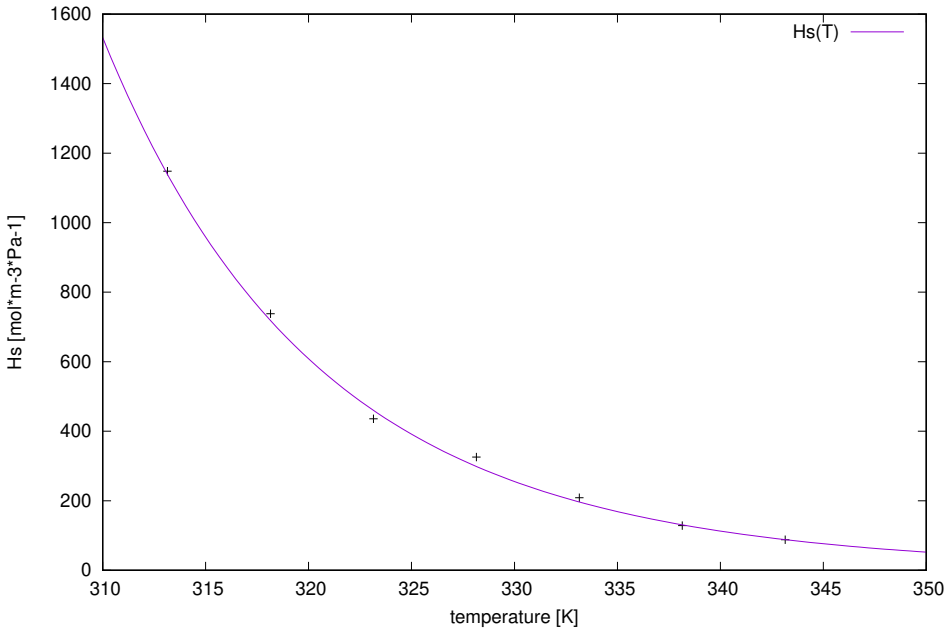



ref = 3584; chem = 1,4-diazacyclohexane; casrn = 110-85-0; r2 = 0.98055

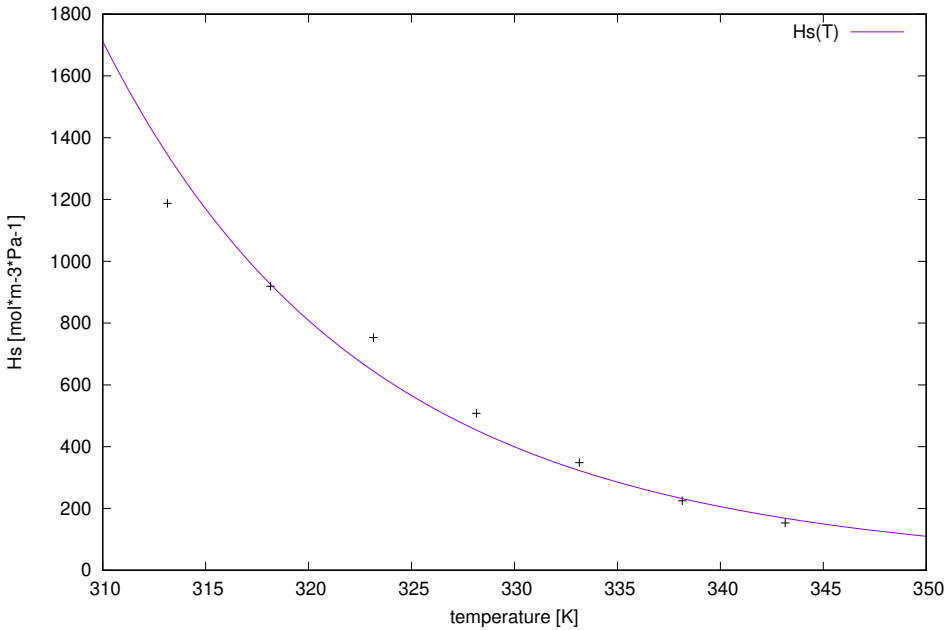

ref = 3584; chem = 1-oxa-4-azacyclohexane; casrn = 110-91-8; r2 = 0.99967

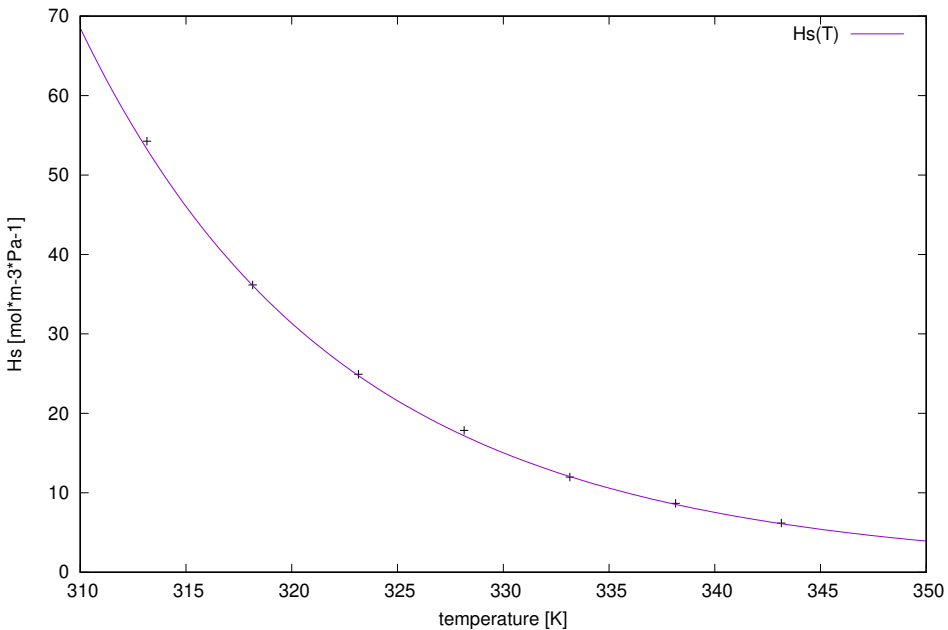

ref = 3584; chem = C4H11NO2; casrn = 111-42-2; r2 = 0.94779

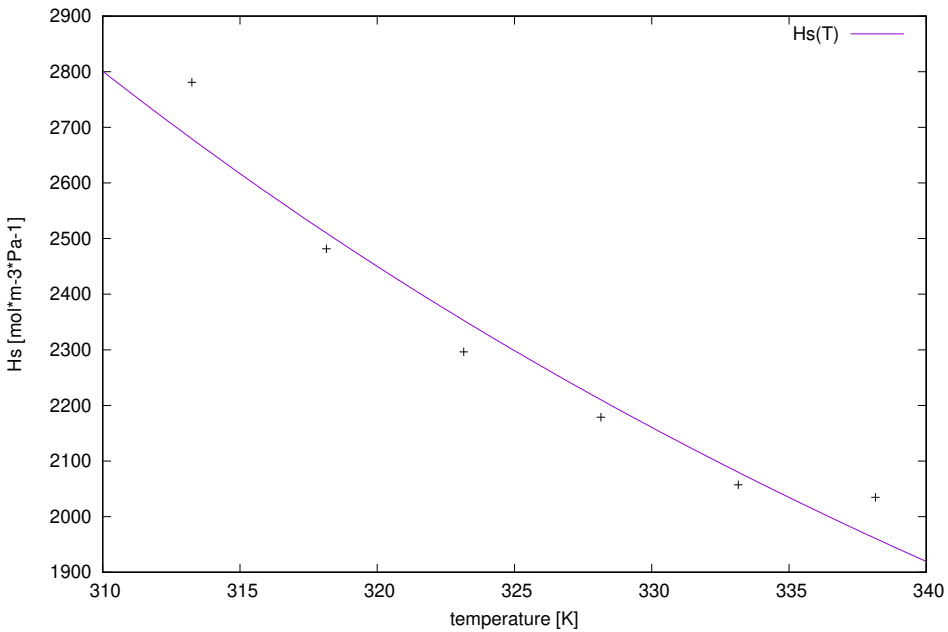

ref = 3584; chem = C6H16N2; casrn = 124-09-4; r2 = 0.90424

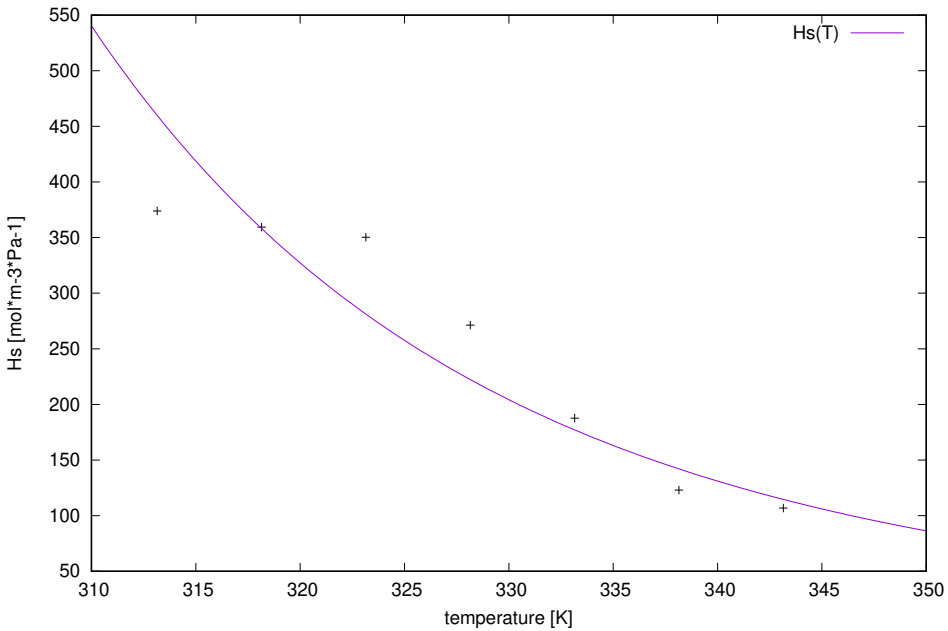

ref = 3584; chem = 2-amino-2-methyl-1-propanol; casrn = 124-68-5; r2 = 0.99916

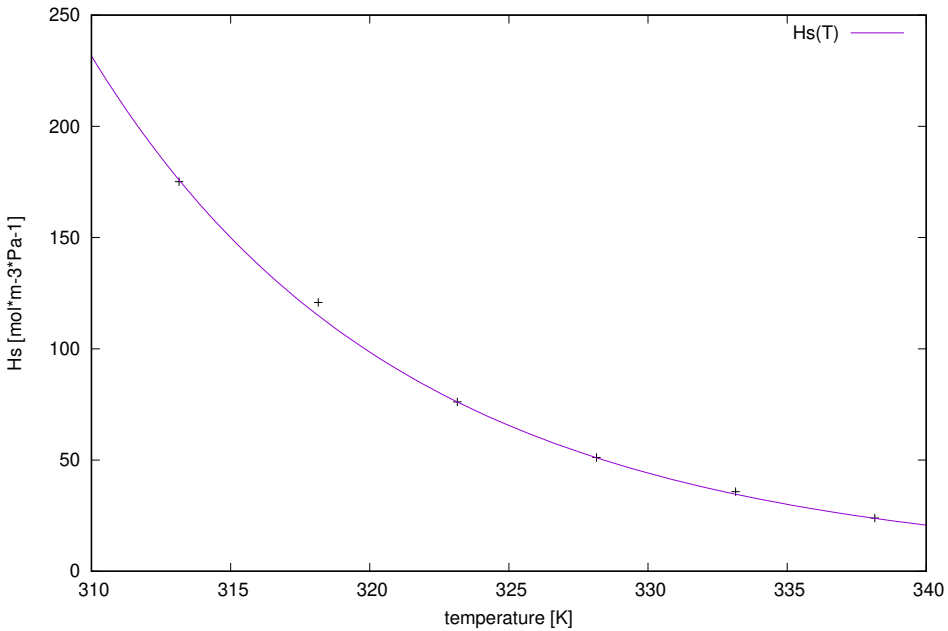

ref = 3584; chem = ethanolamine; casrn = 141-43-5; r2 = 0.98134

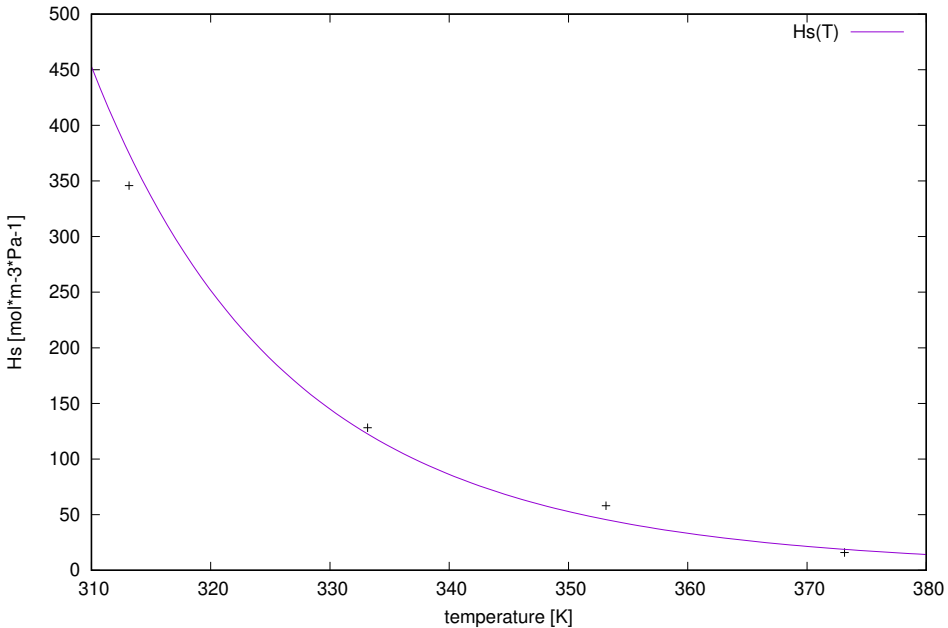

ref = 3584; chem = dimethylaminoethoxyethanol; casrn = 1704-62-7; r2 = 0.96571

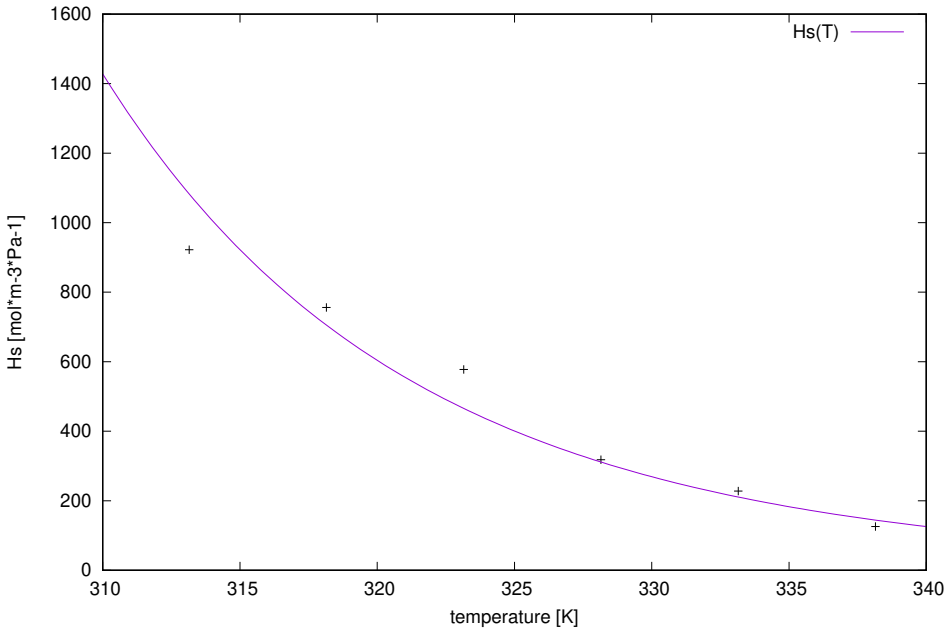

ref = 3584; chem = C3H9NO; casrn = 6168-72-5; r2 = 0.97426

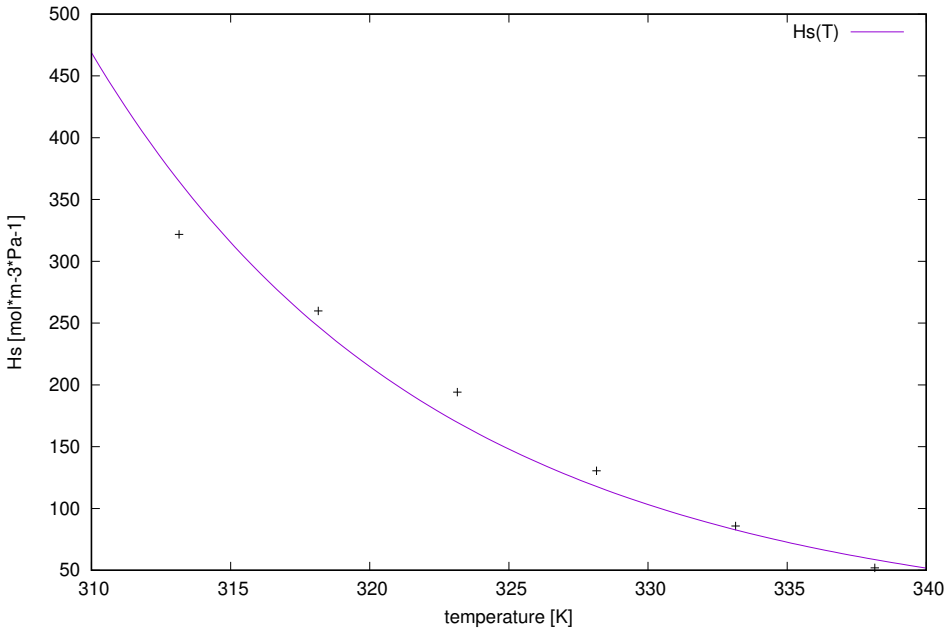



ref = 3584; chem = C4H12N2; casrn = 6291-84-5; r2 = 0.98847

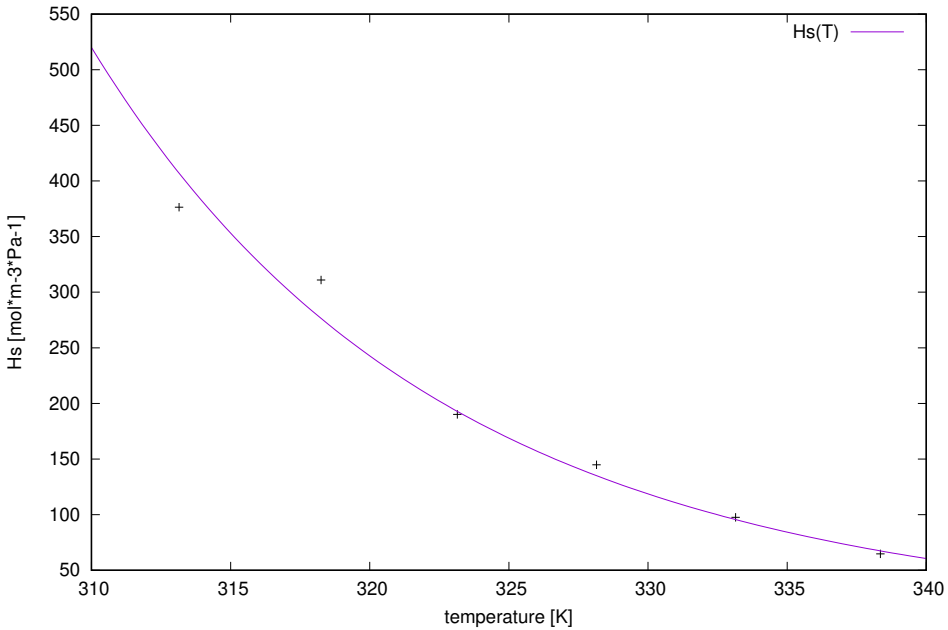

ref = 3584; chem = C12H24N2O3; casrn = 6425-39-4; r2 = 0.95800

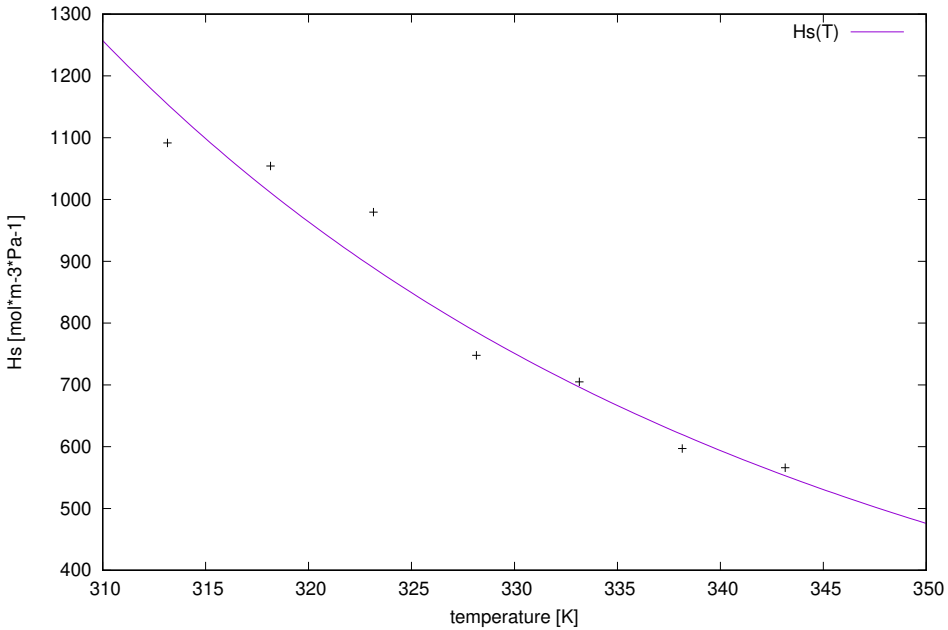

ref = 3584; chem = C3H10N2; casrn = 78-90-0; r2 = 0.98135

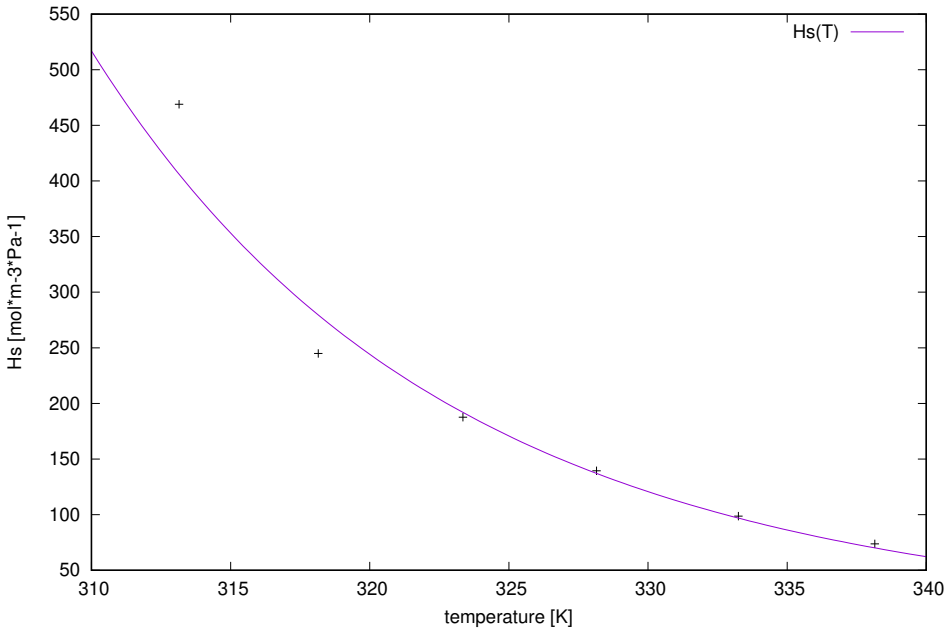

ref = 3584; chem = diglycolamine; casrn = 929-06-6; r2 = 0.86366

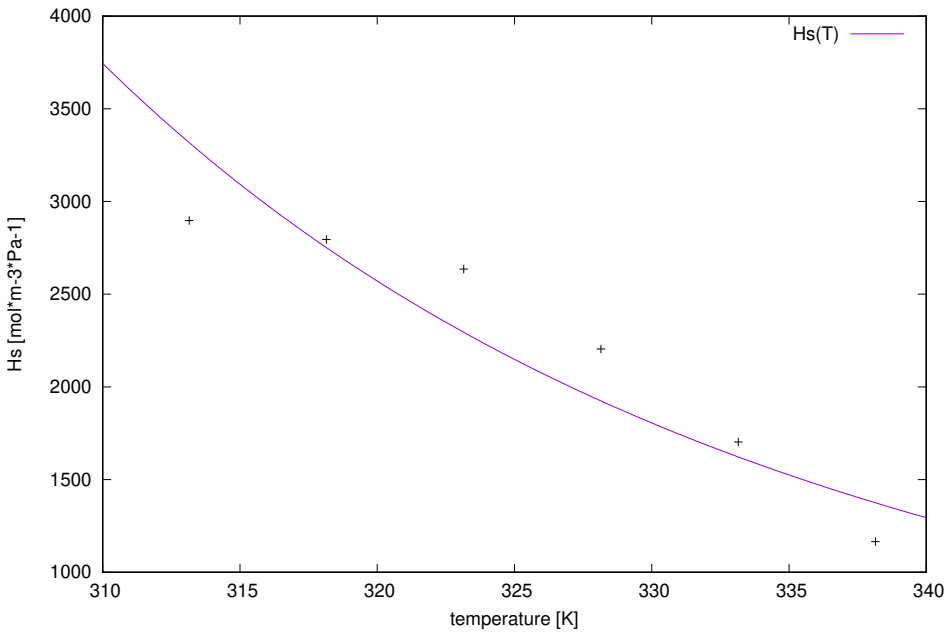

ref = 3592; chem = ozone; casrn = 10028-15-6; r2 = 0.99582

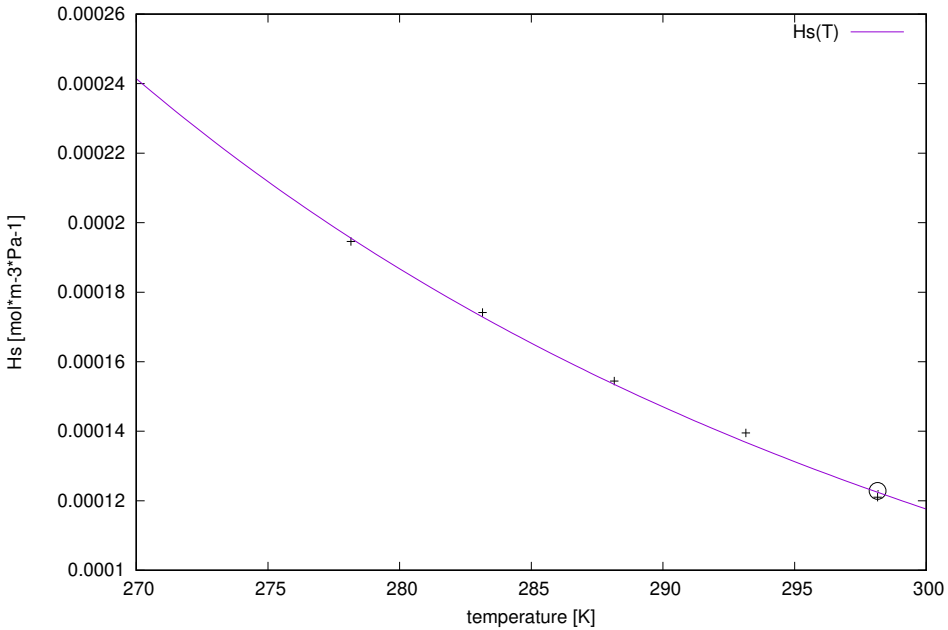

ref = 3593; chem = ozone; casrn = 10028-15-6; r2 = 0.96435

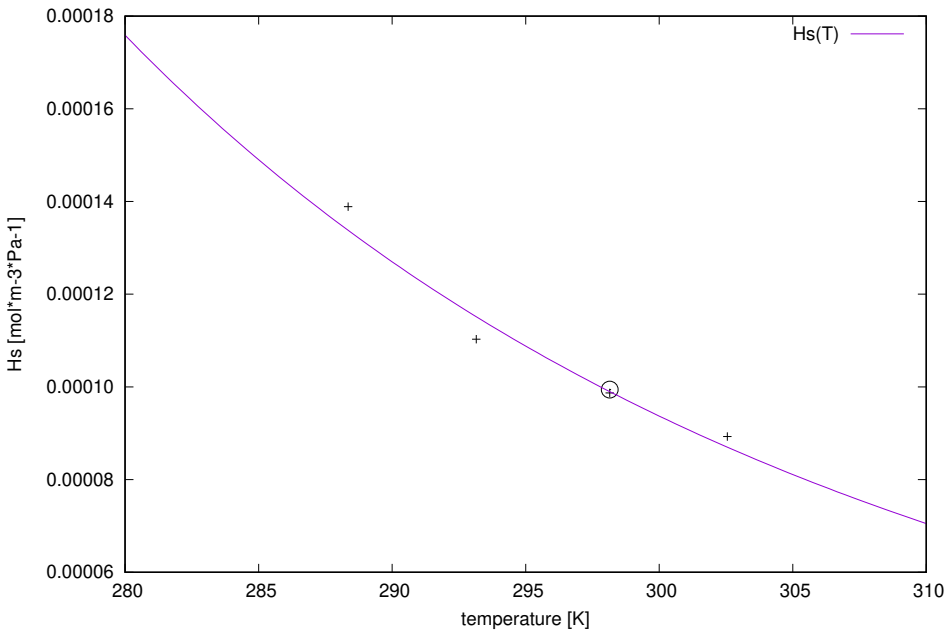

ref = 3595; chem = ozone; casrn = 10028-15-6; r2 = 1.00000

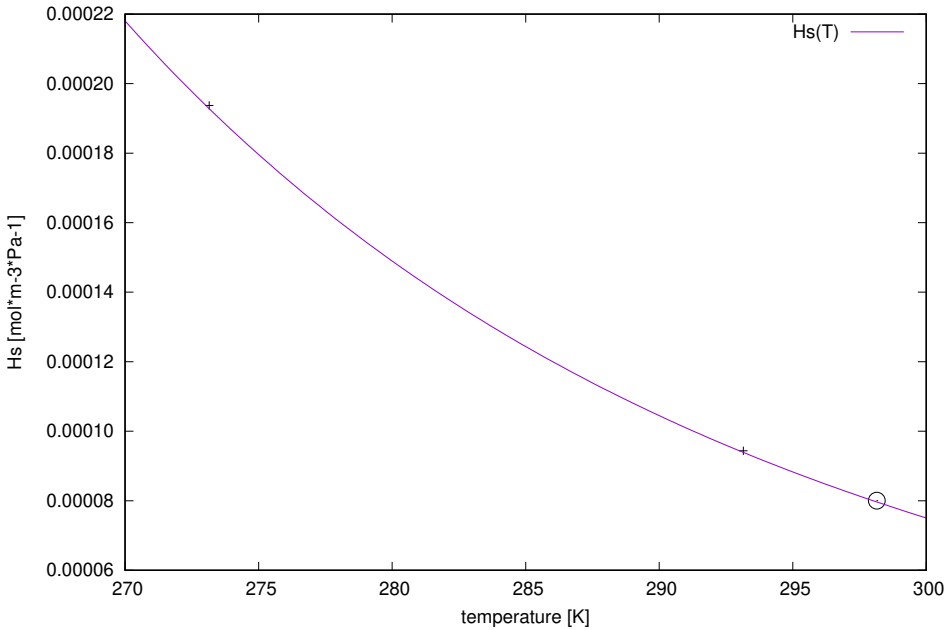

ref = 3596; chem = ozone; casrn = 10028-15-6; r2 = 1.00000

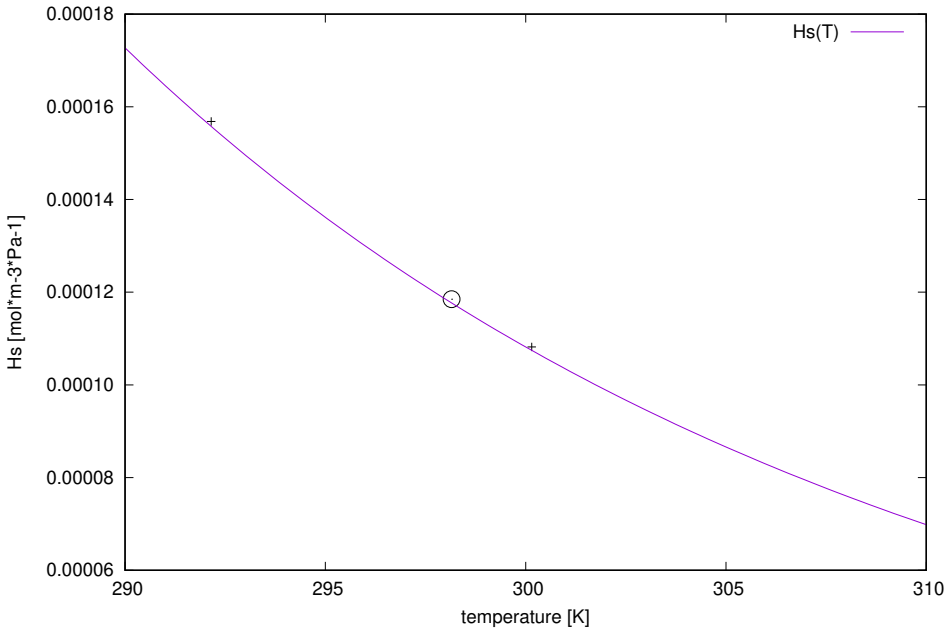



ref = 3601; chem = sulfur hexafluoride; casrn = 2551-62-4; r2 = 0.27057

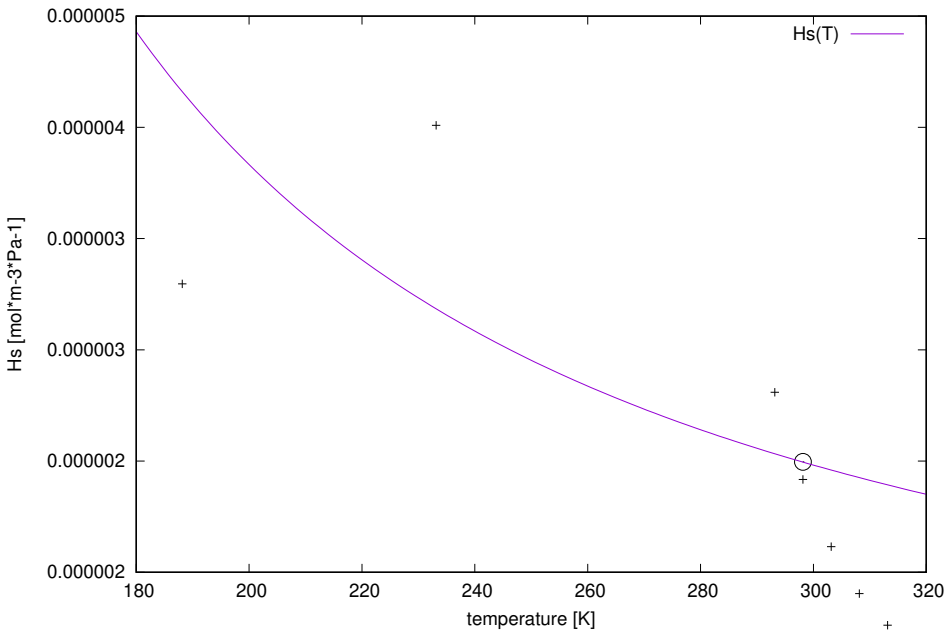

ref = 3601; chem = methane; casrn = 74-82-8; r2 = 0.98139

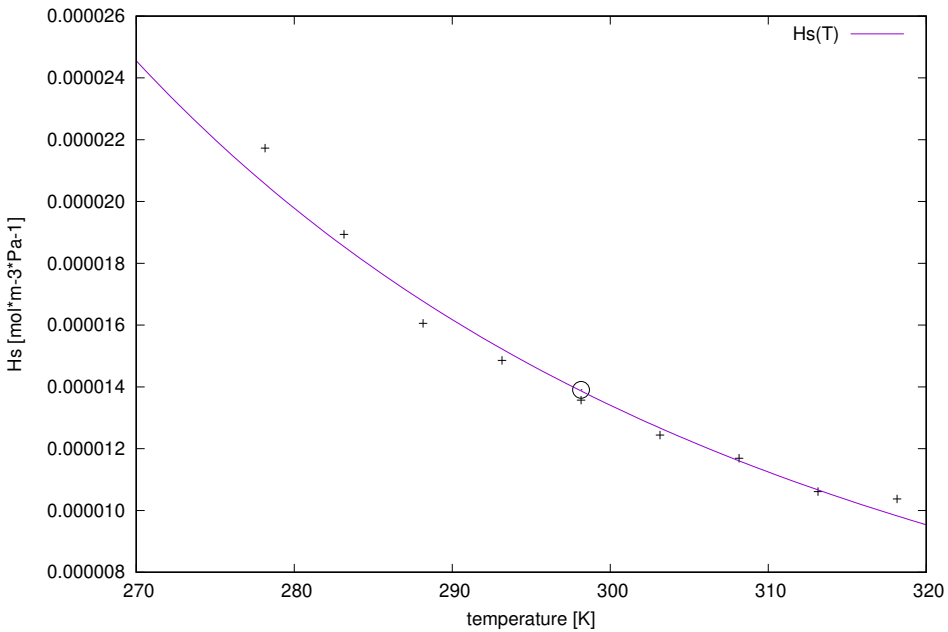

ref = 3601; chem = ethane; casrn = 74-84-0; r2 = 0.99566

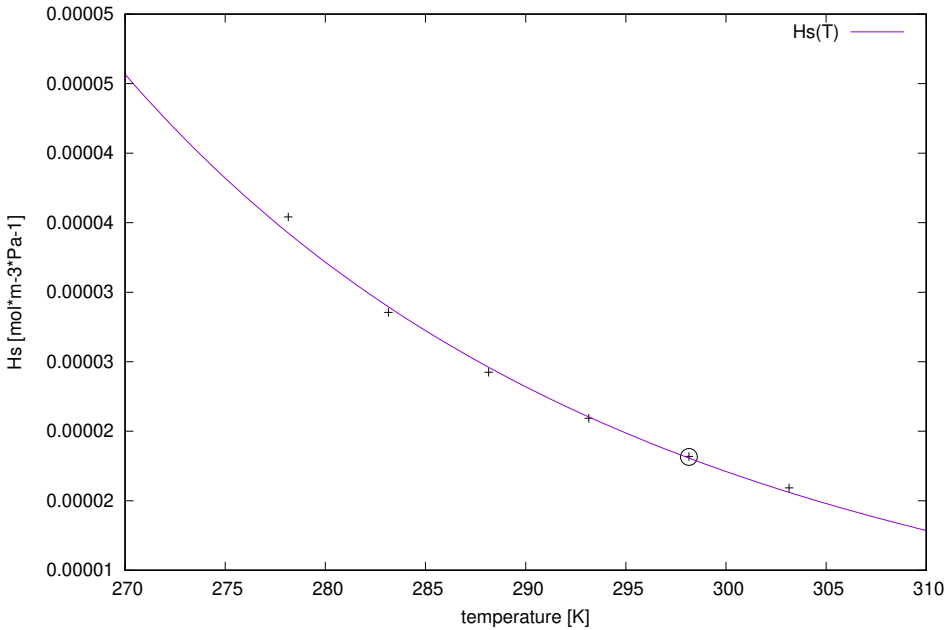

ref = 3601; chem = krypton; casrn = 7439-90-9; r2 = 0.98742

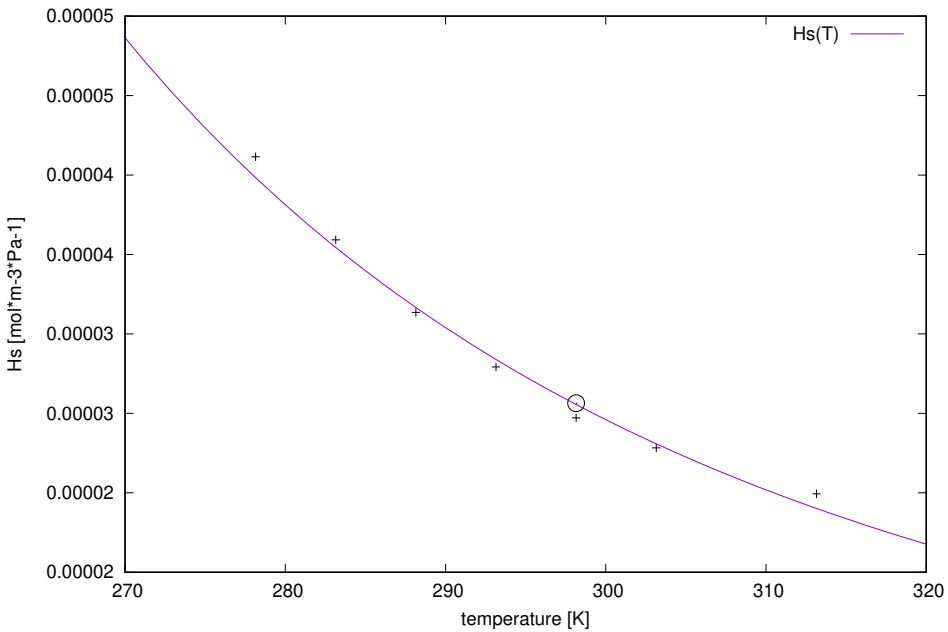

ref = 3601; chem = argon; casrn = 7440-37-1; r2 = 0.91279

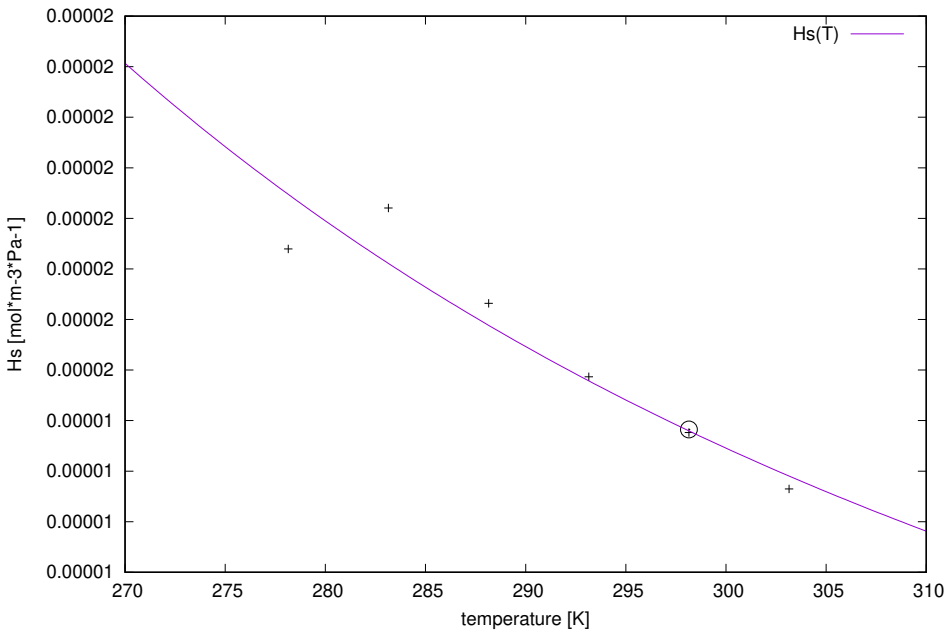

ref = 3601; chem = tetrafluoromethane; casrn = 75-73-0; r2 = 0.98885

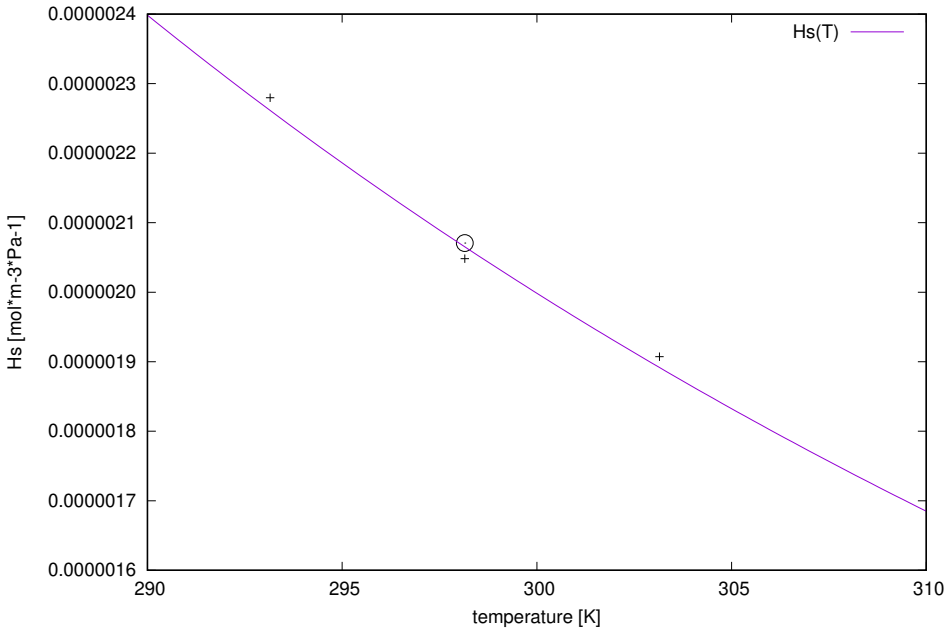

ref = 3601; chem = nitrogen; casrn = 7727-37-9; r2 = 0.98810

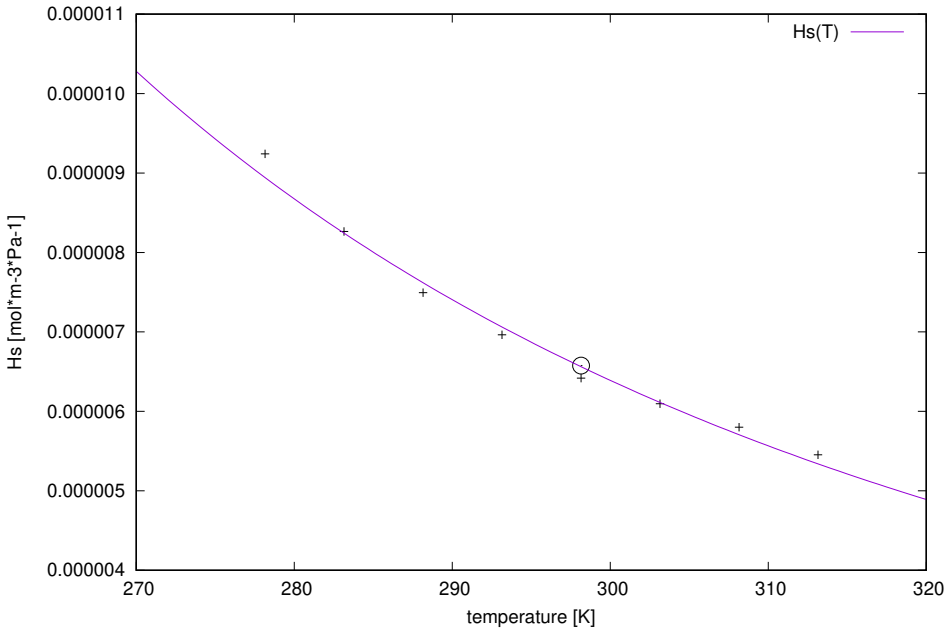

ref = 3601; chem = oxygen; casrn = 7782-44-7; r2 = 0.98760

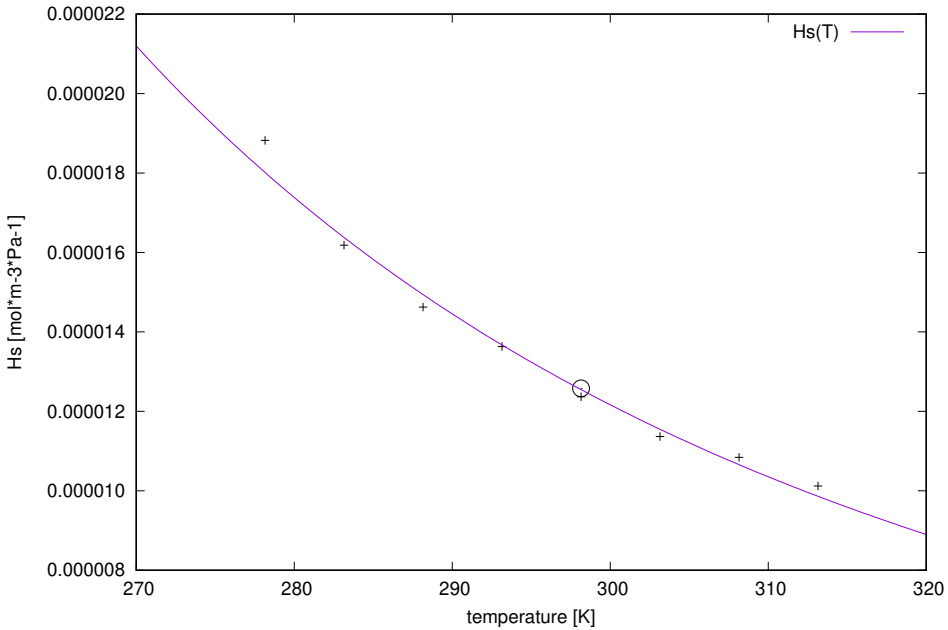



ref = 3603; chem = oxygen; casrn = 7782-44-7; r2 = 0.99944

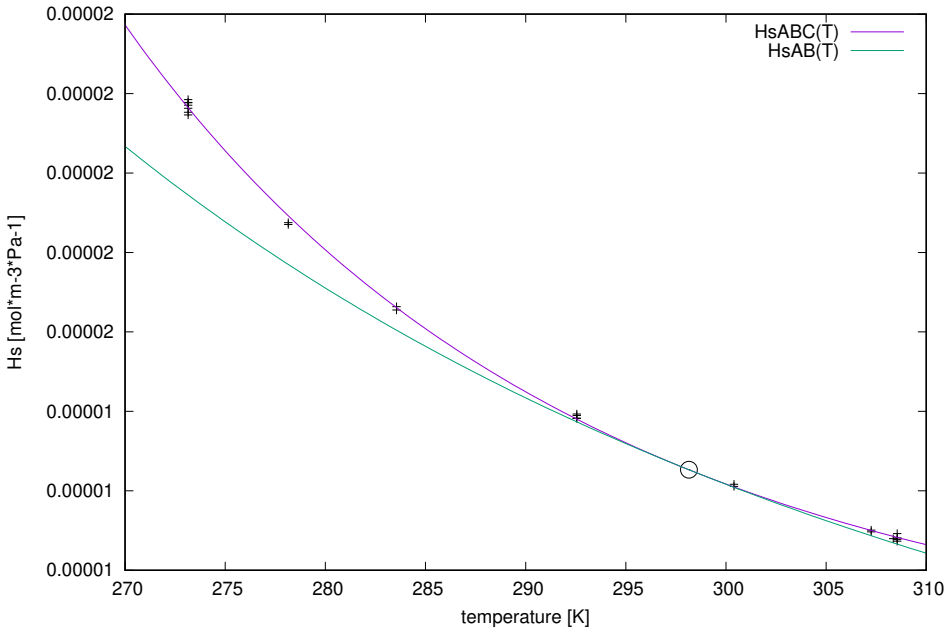

ref = 3605; chem = oxygen; casrn = 7782-44-7; r2 = 0.99982

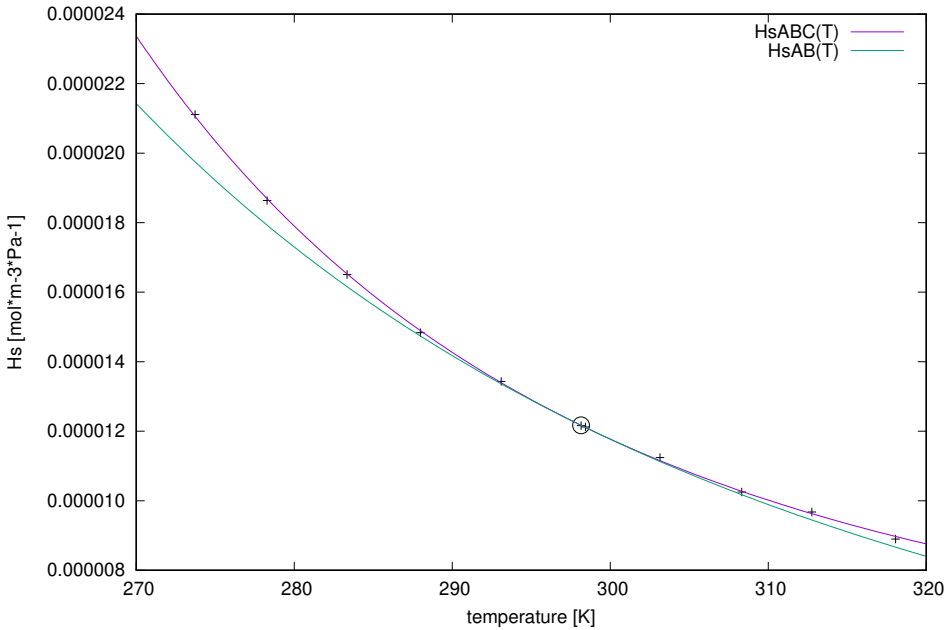

ref = 3606; chem = oxygen; casrn = 7782-44-7; r2 = 0.99999

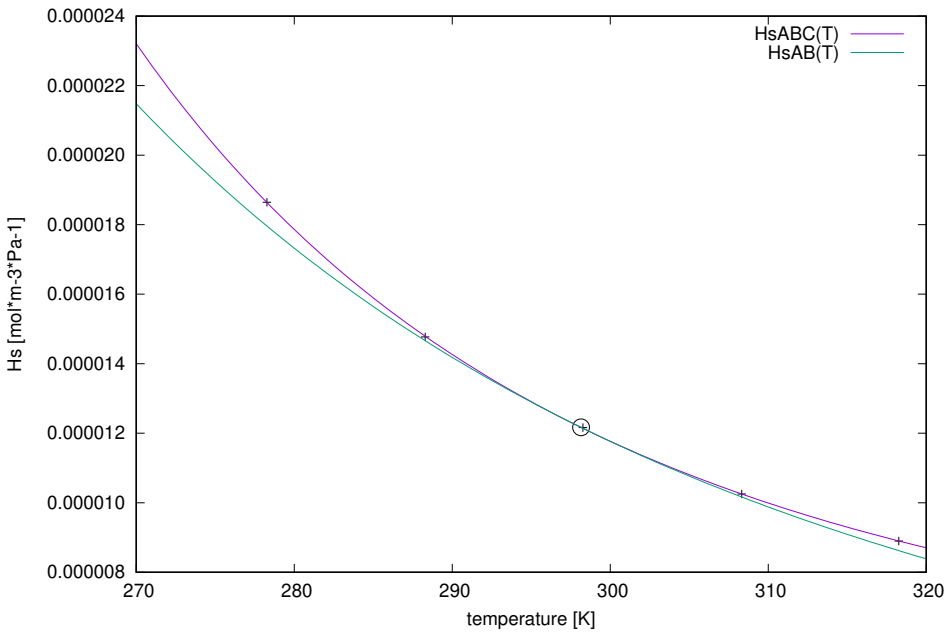

ref = 3609; chem = cyclohexanol; casrn = 108-93-0; r2 = 1.00000

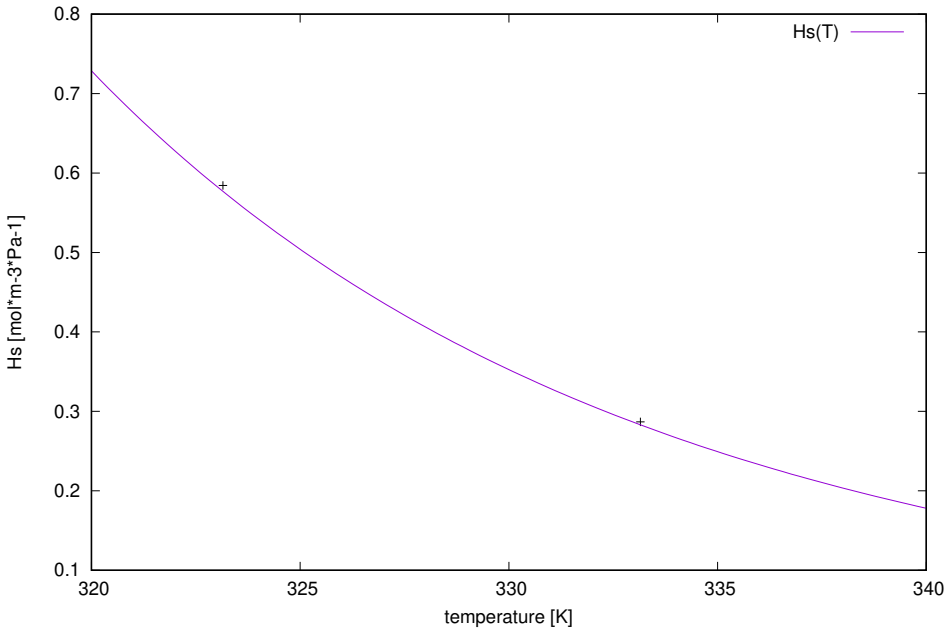

ref = 3609; chem = cyclohexanone; casrn = 108-94-1; r2 = 0.99991

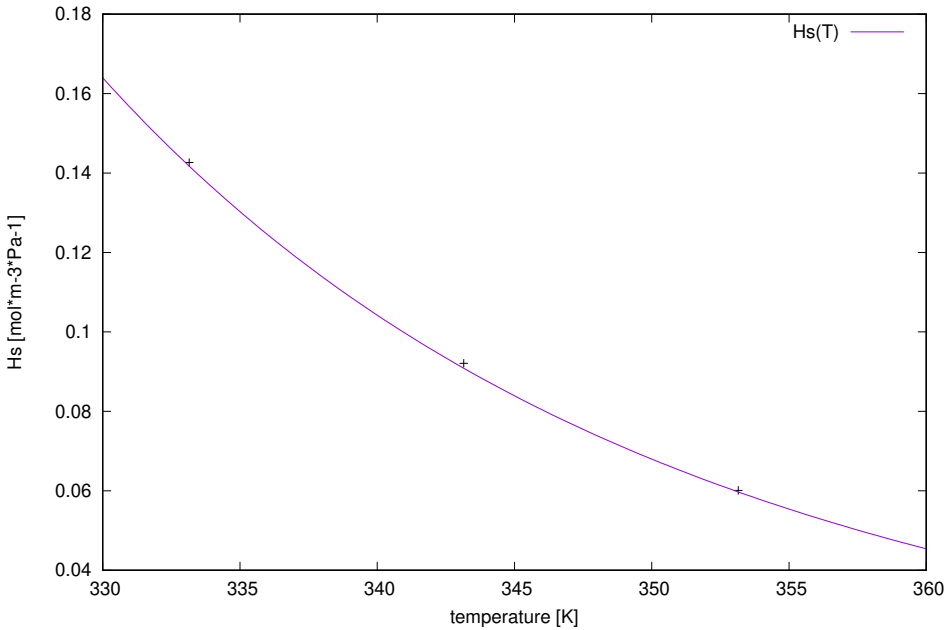

ref = 3609; chem = cyclopentanone; casrn = 120-92-3; r2 = 1.00000

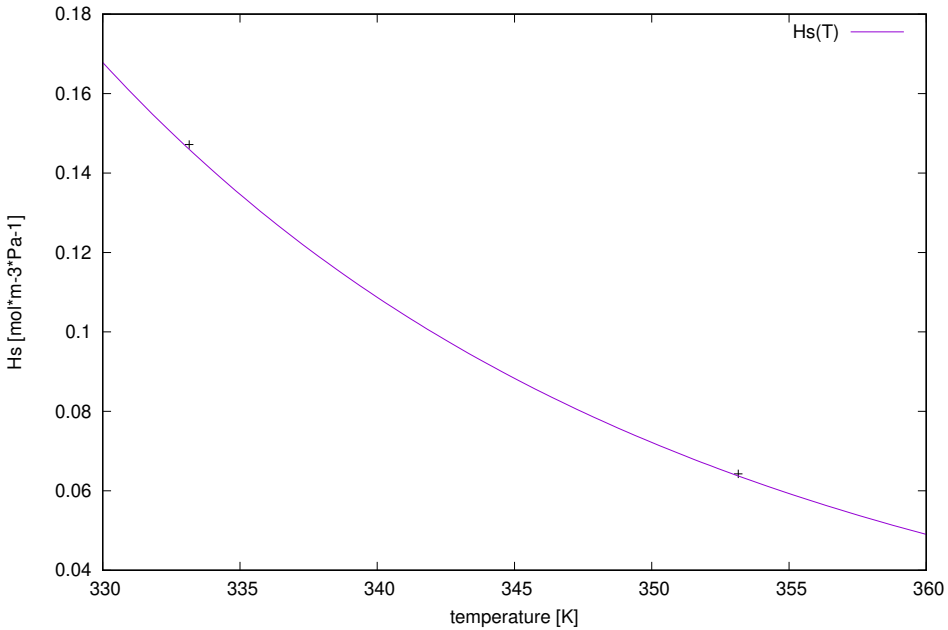

ref = 3609; chem = 2,4-pentanedione; casrn = 123-54-6; r2 = 0.99821

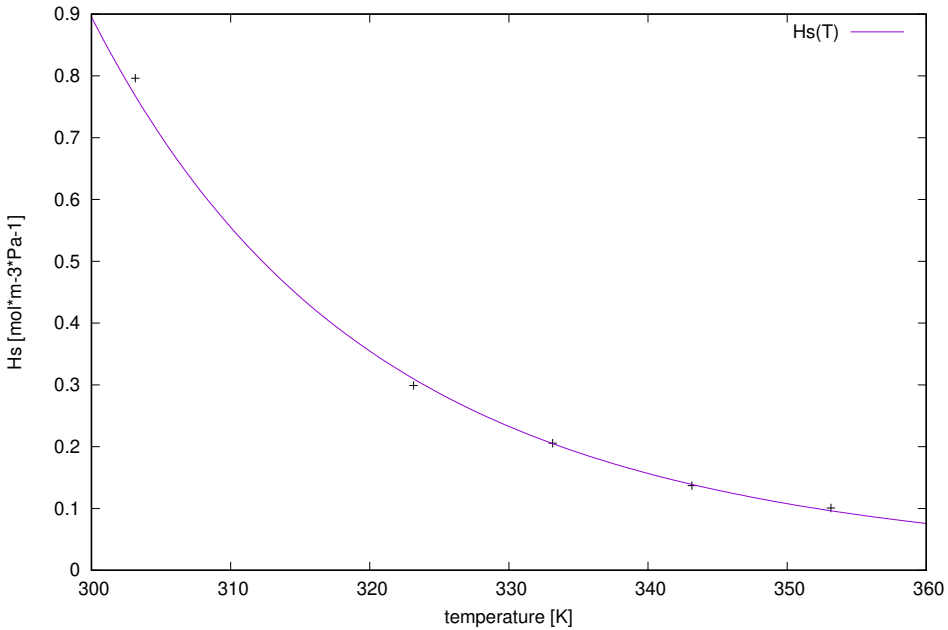

ref = 3609; chem = 1-butanol; casrn = 71-36-3; r2 = 0.99665

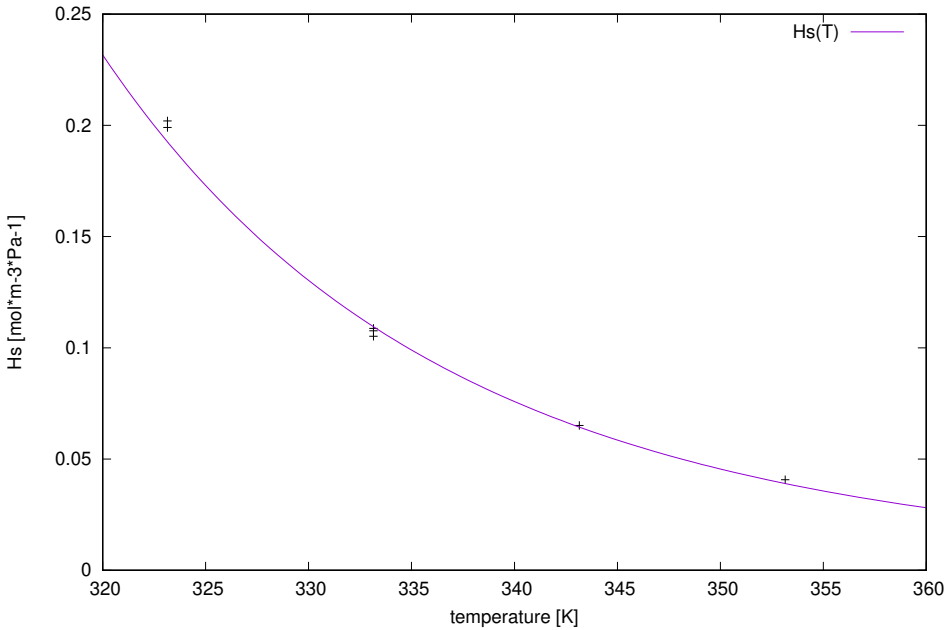



ref = 3609; chem = ethane nitrile; casrn = 75-05-8; r2 = 0.99638

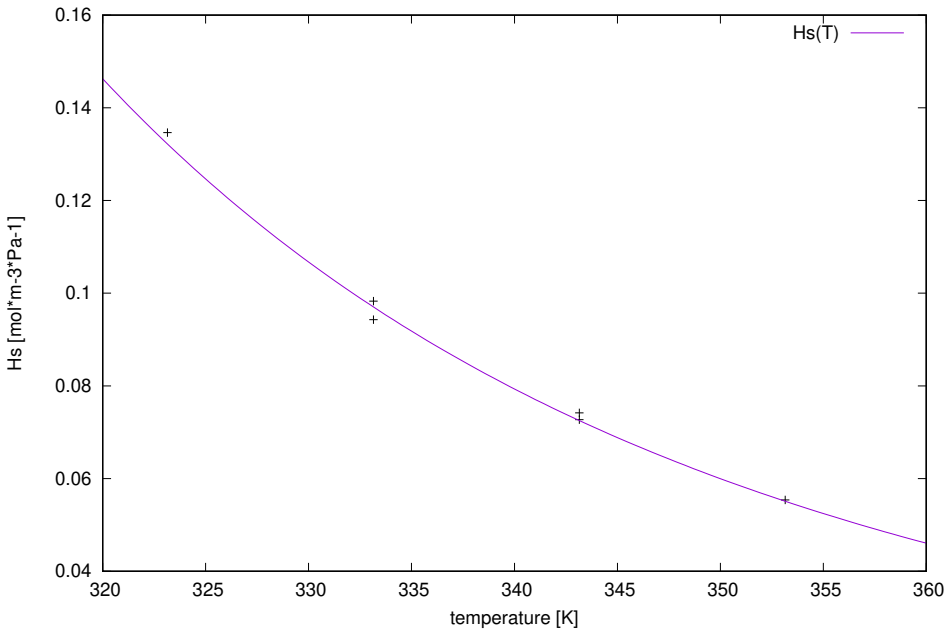

ref = 3609; chem = 2-methyl-1-propanol; casrn = 78-83-1; r2 = 0.99804

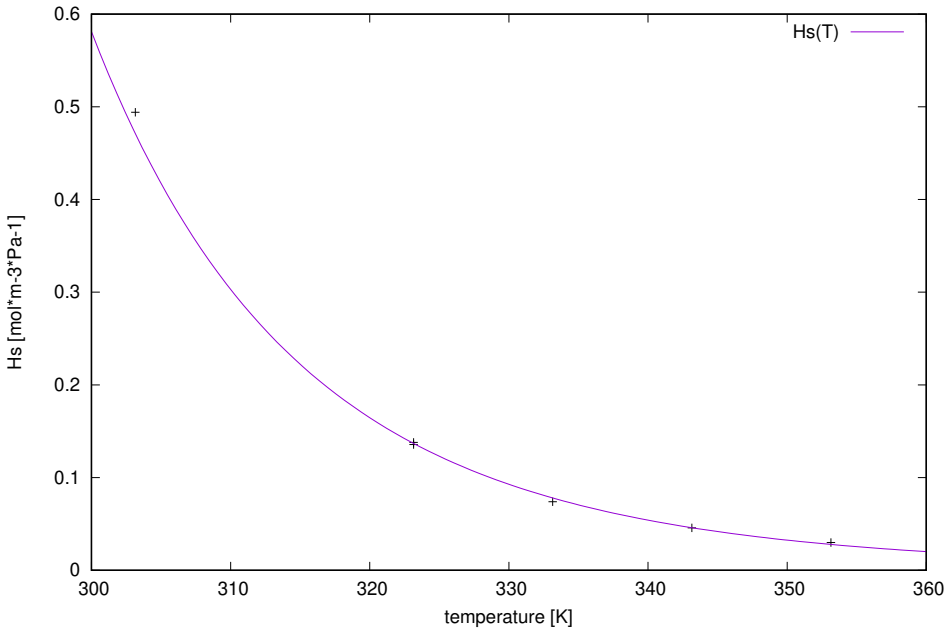

ref = 3609; chem = butanone; casrn = 78-93-3; r2 = 0.99918

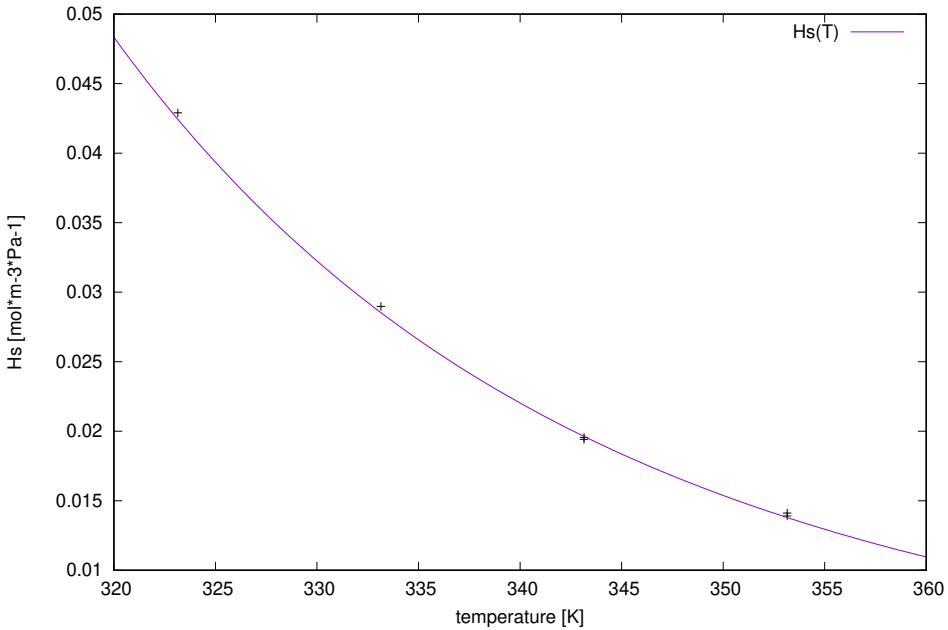

ref = 3609; chem = methyl ethanoate; casrn = 79-20-9; r2 = 1.00000

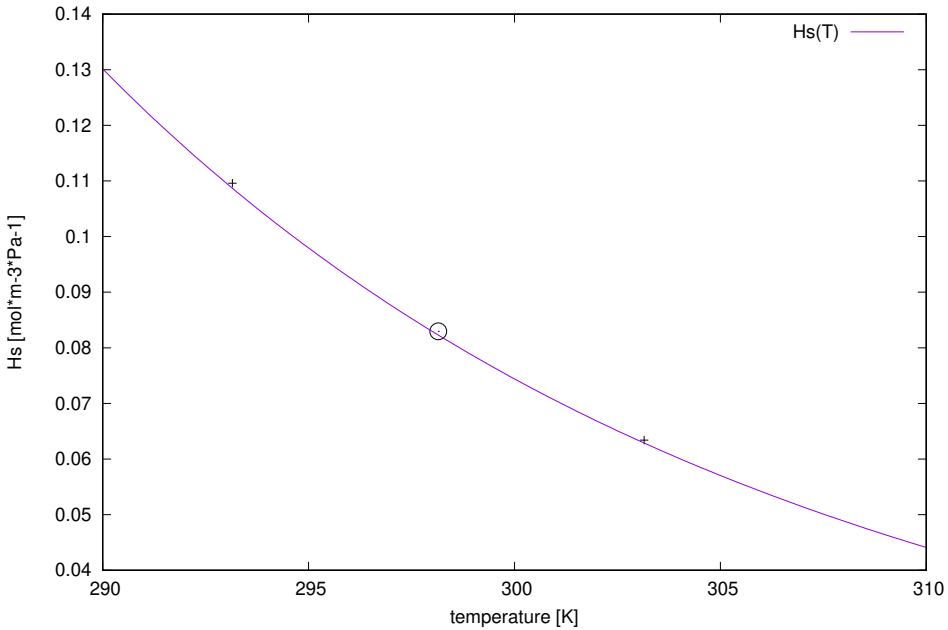

ref = 3609; chem = cyclopentanol; casrn = 96-41-3; r2 = 1.00000

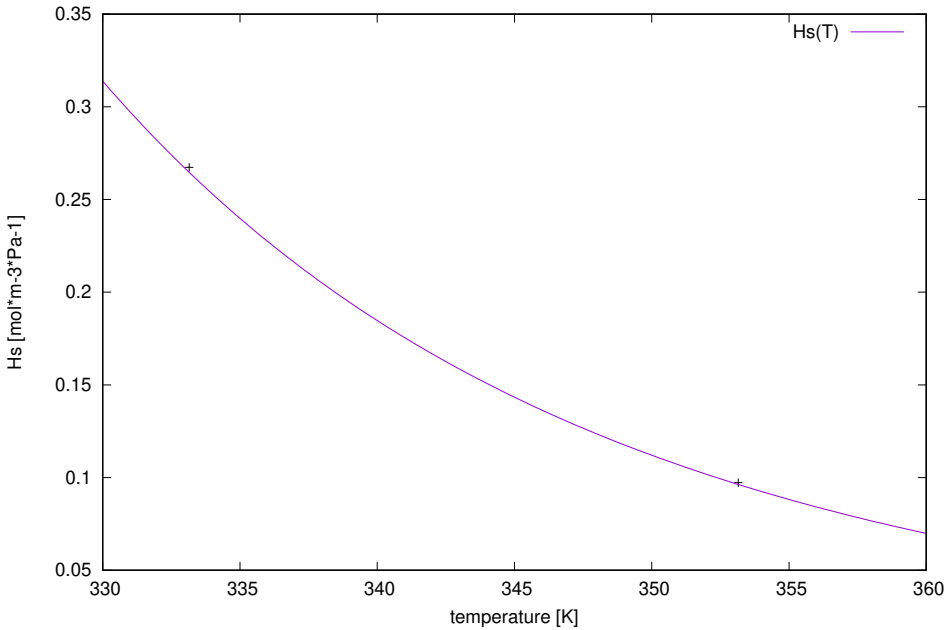

ref = 3610; chem = dimethyl disulfide; casrn = 624-92-0; r2 = 0.99965

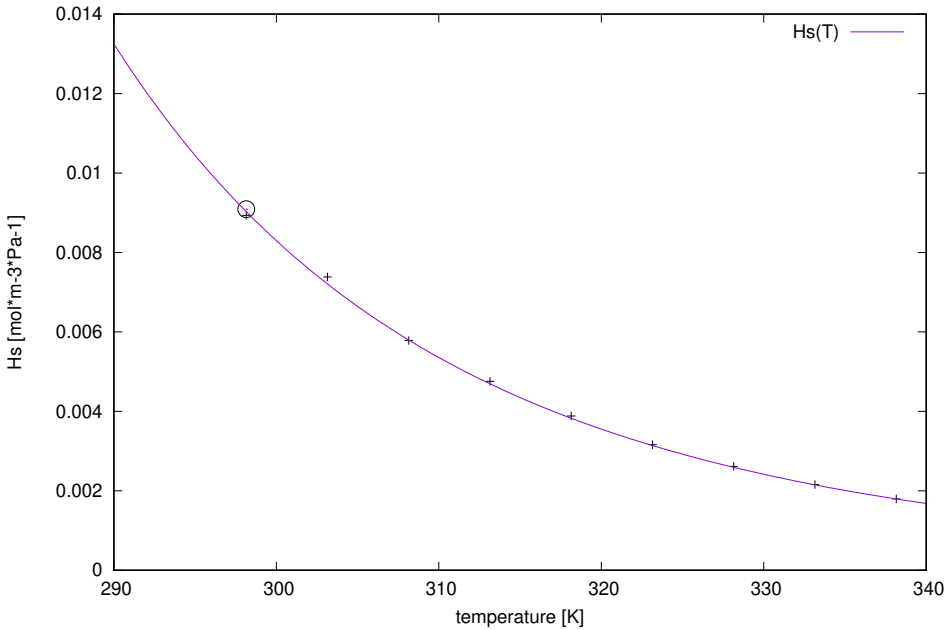

ref = 3612; chem = 1-butene; casrn = 106-98-9; r2 = 0.99951

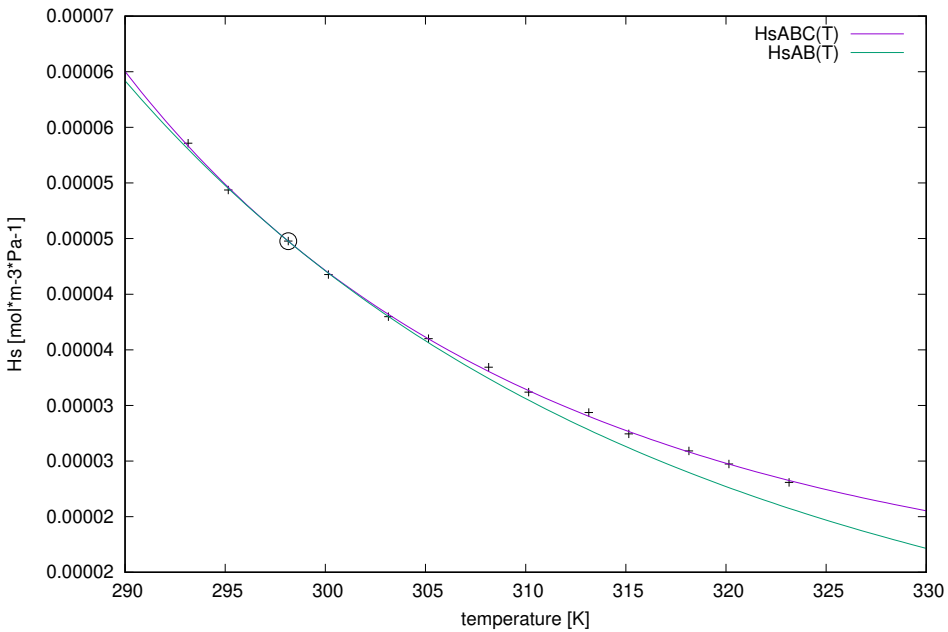

ref = 3628; chem = oxygen; casrn = 7782-44-7; r2 = 0.91591

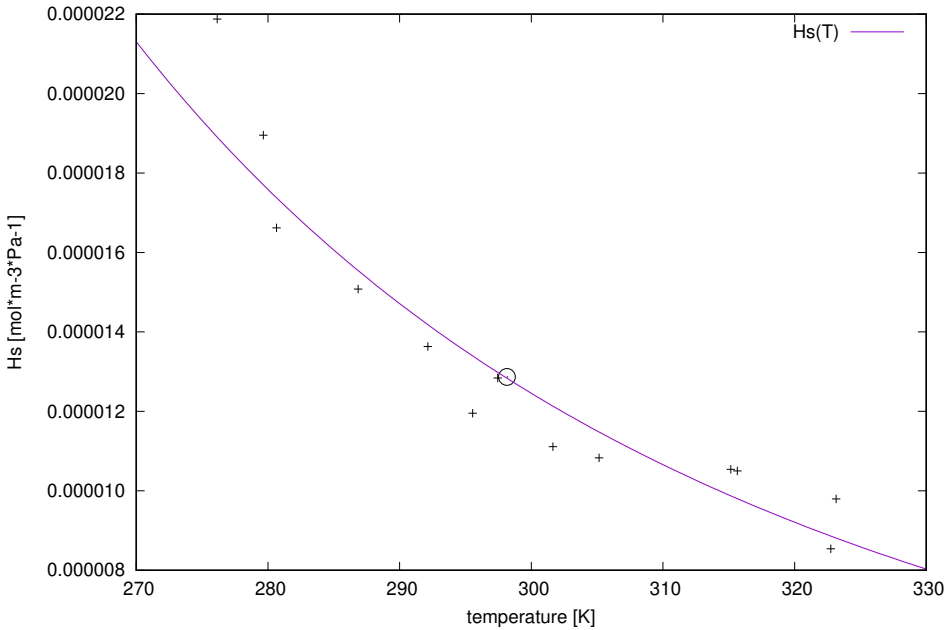



ref = 3632; chem = pentan-2-one; casrn = 107-87-9; r2 = 0.99888

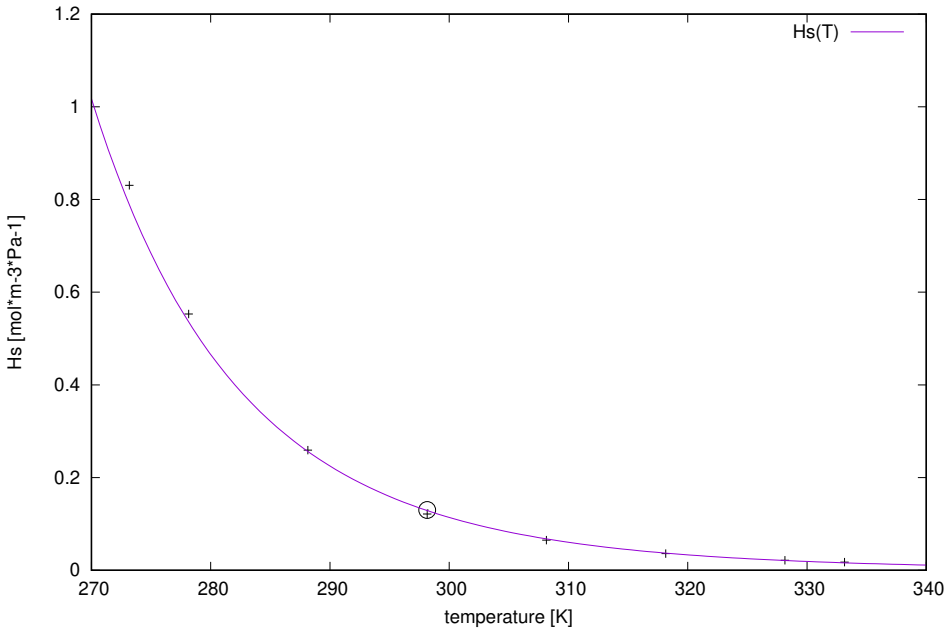

ref = 3632; chem = 4-methylpentan-2-one; casrn = 108-10-1; r2 = 0.99836

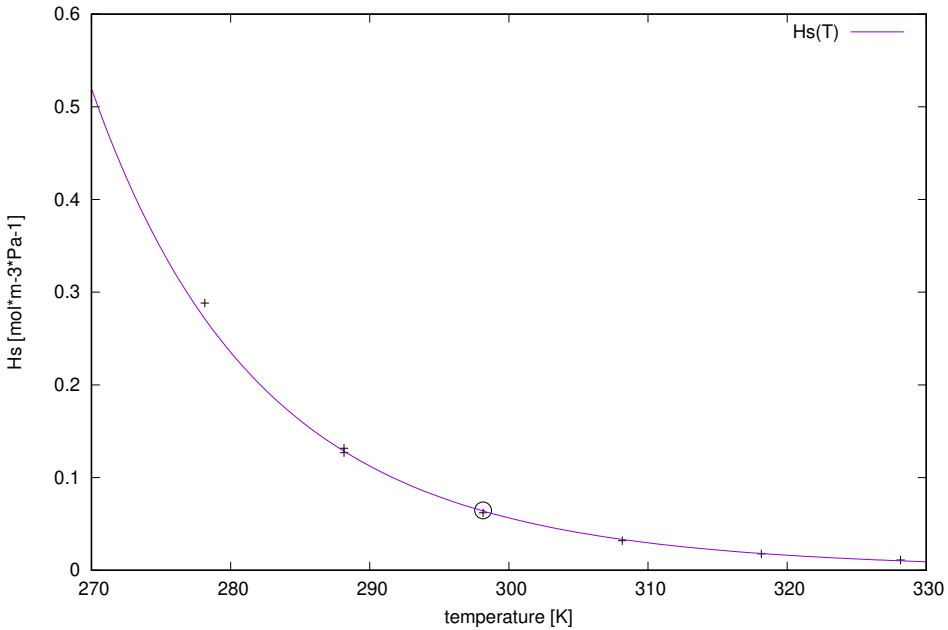

ref = 3632; chem = 3-methylbutan-2-one; casrn = 563-80-4; r2 = 0.99862

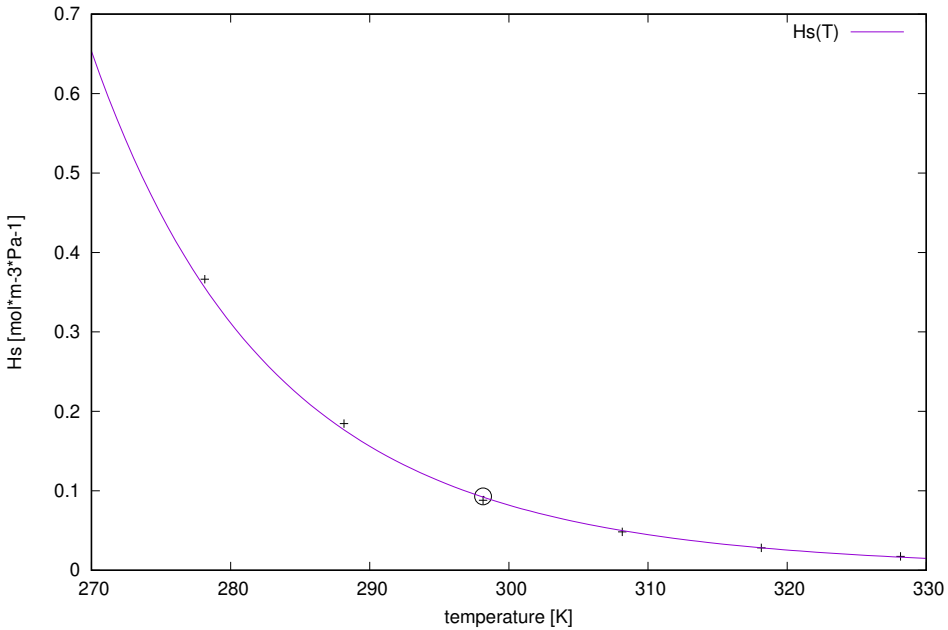

ref = 3632; chem = 3-methylpentan-2-one; casrn = 565-61-7; r2 = 0.99875

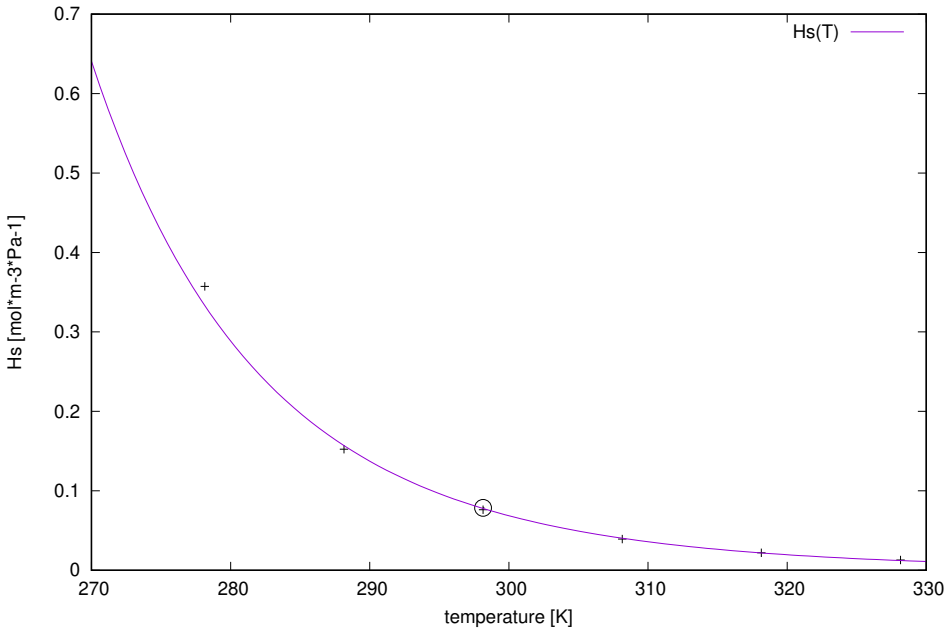

ref = 3632; chem = 2-methylpentan-3-one; casrn = 565-69-5; r2 = 0.99765

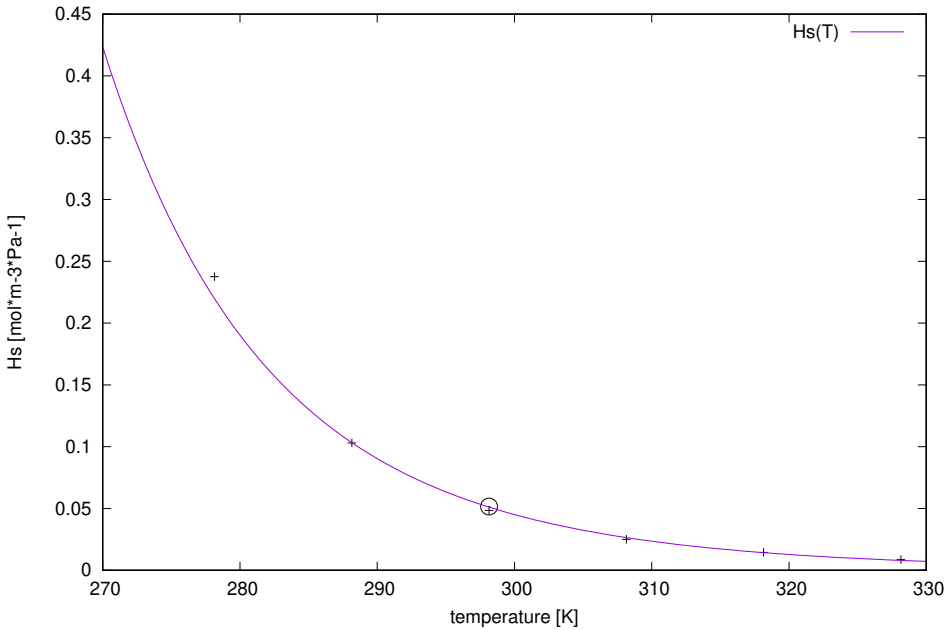

ref = 3632; chem = hexan-3-one; casrn = 589-38-8; r2 = 0.99710

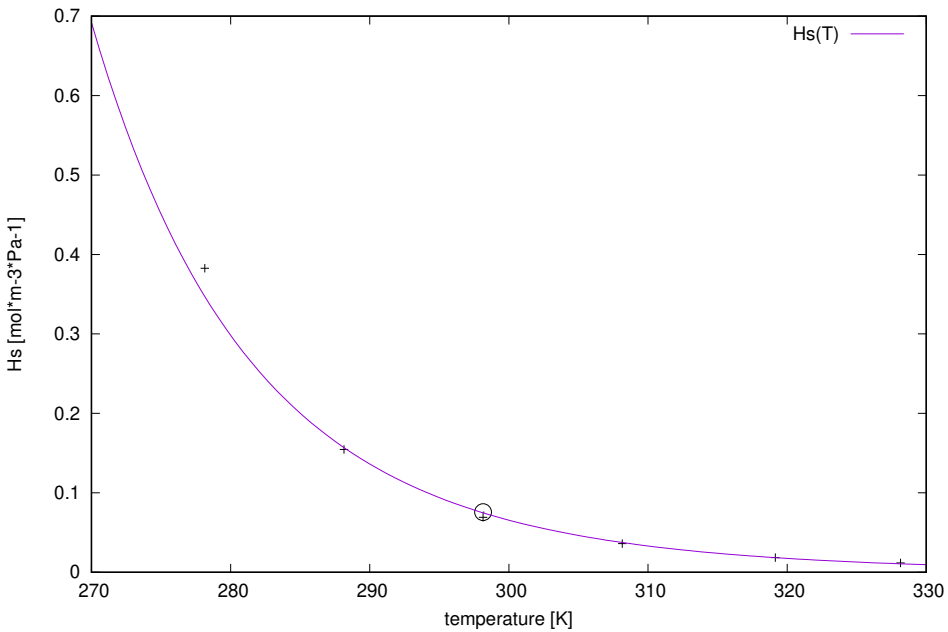

ref = 3632; chem = hexan-2-one; casrn = 591-78-6; r2 = 0.99631

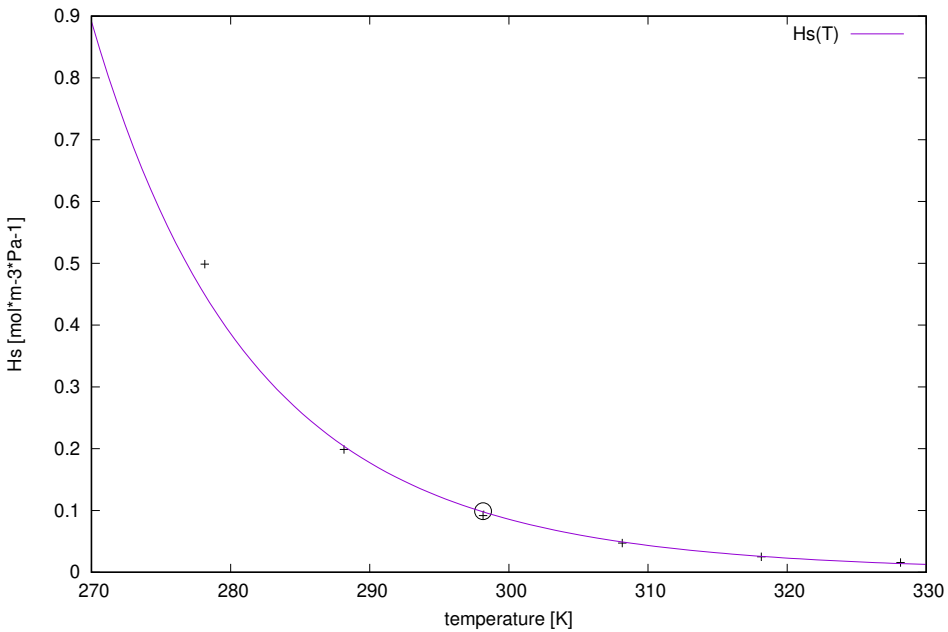

ref = 3632; chem = 3,3-dimethylbutan-2-one; casrn = 75-97-8; r2 = 0.99654

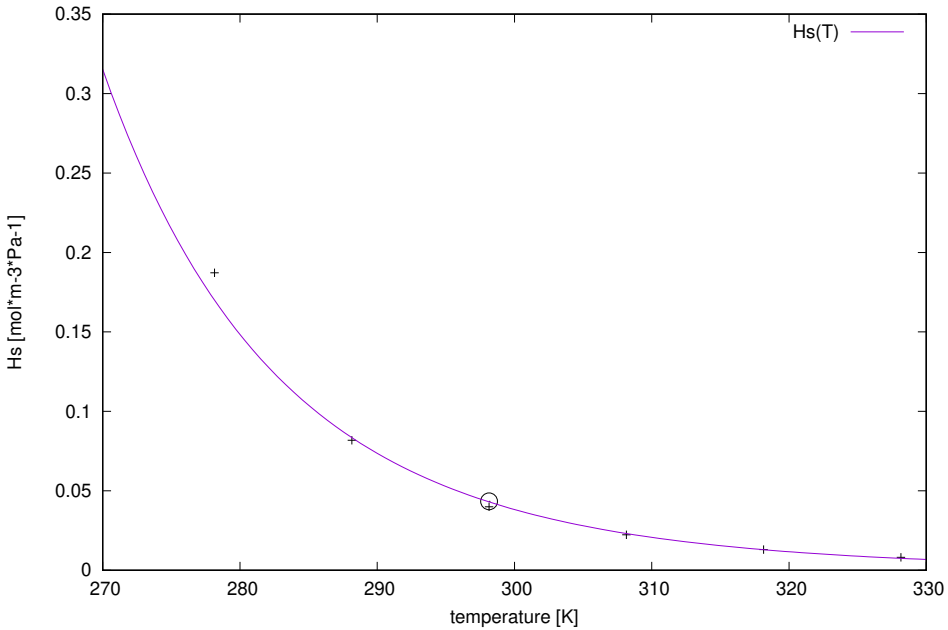



ref = 3632; chem = pentan-3-one; casrn = 96-22-0; r2 = 0.99741

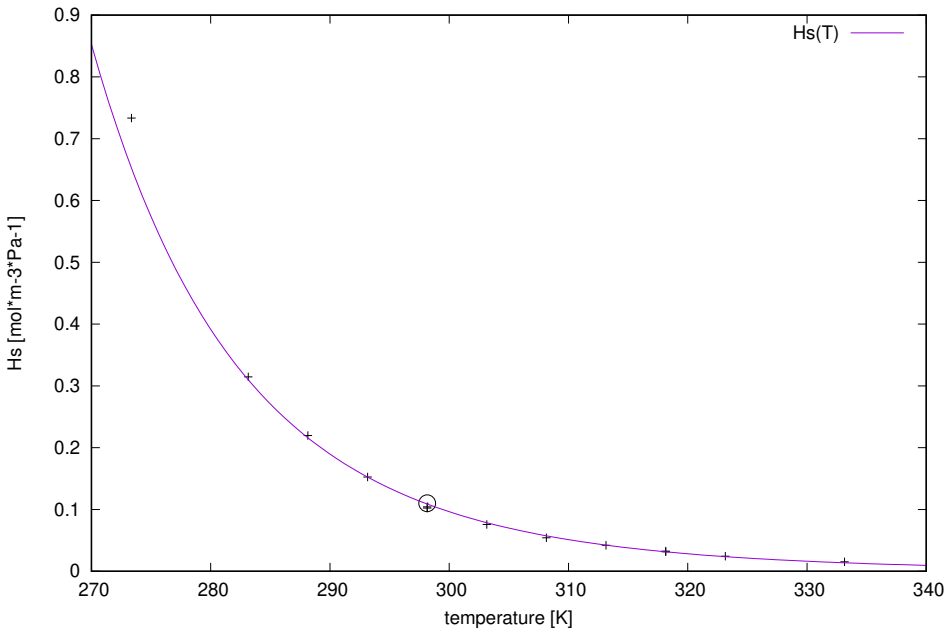

ref = 3638; chem = methyl hexanoate; casrn = 106-70-7; r2 = 1.00000

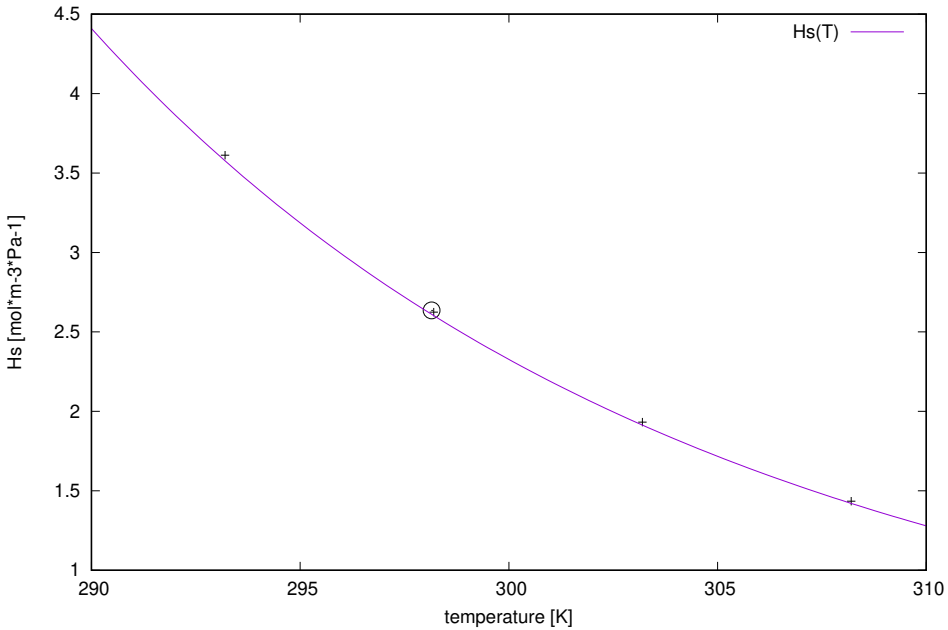

ref = 3638; chem = 2-pentanone; casrn = 107-87-9; r2 = 1.00000

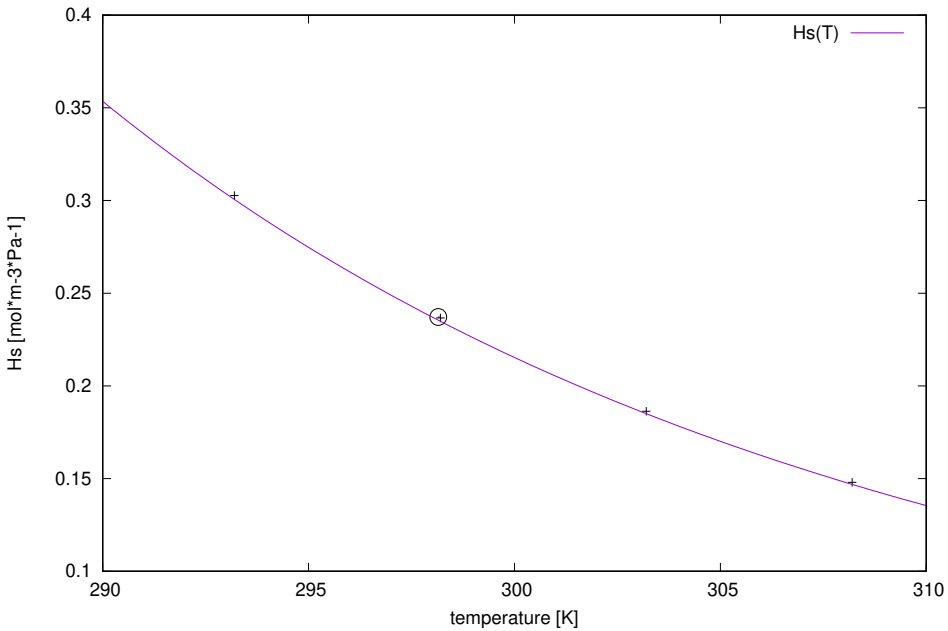

ref = 3638; chem = 2-heptanone; casrn = 110-43-0; r2 = 1.00000

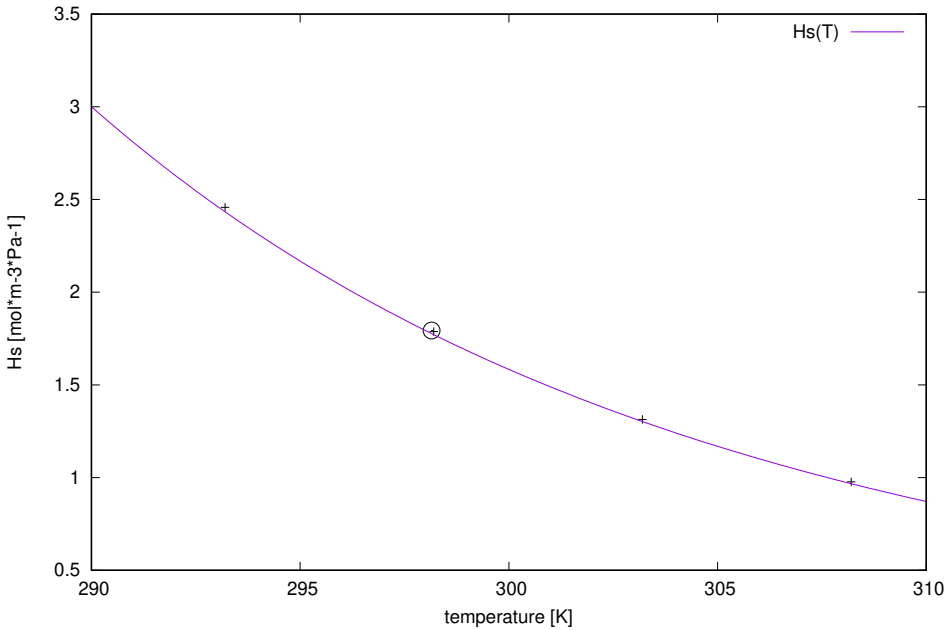

ref = 3638; chem = pentanal; casrn = 110-62-3; r2 = 1.00000

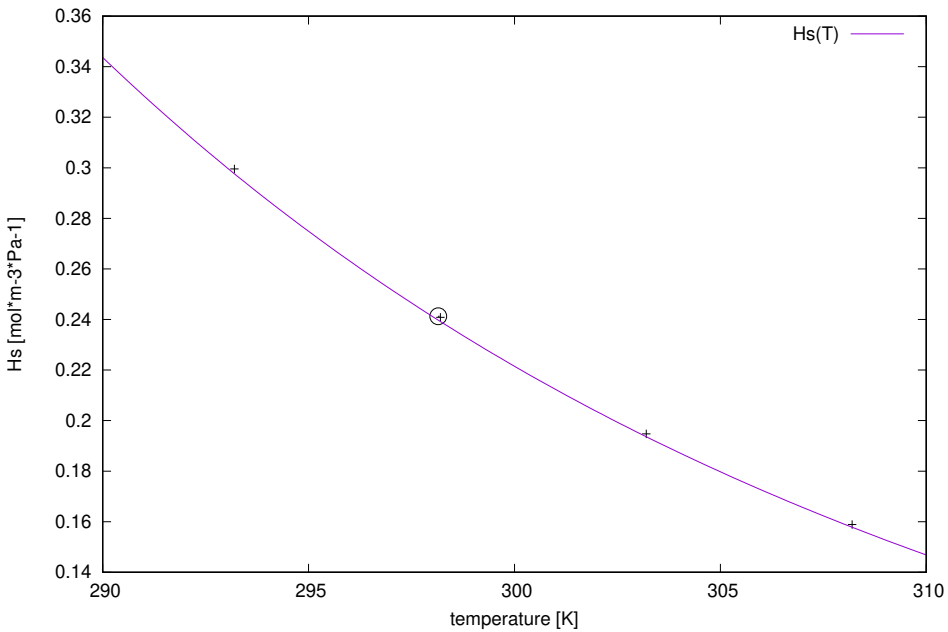

ref = 3638; chem = 1-hexanol; casrn = 111-27-3; r2 = 1.00000

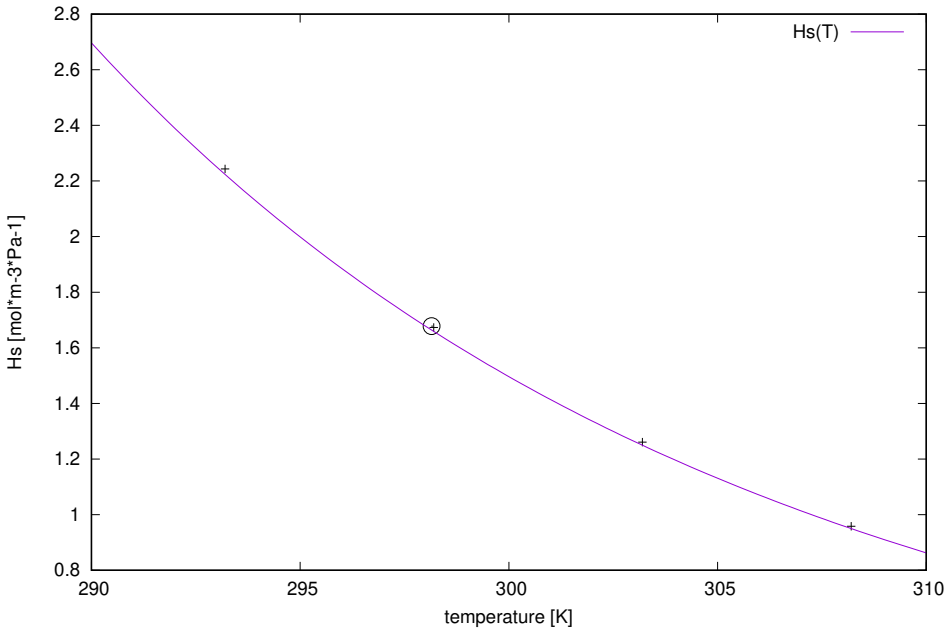

ref = 3638; chem = 1-heptanol; casrn = 111-70-6; r2 = 0.99999

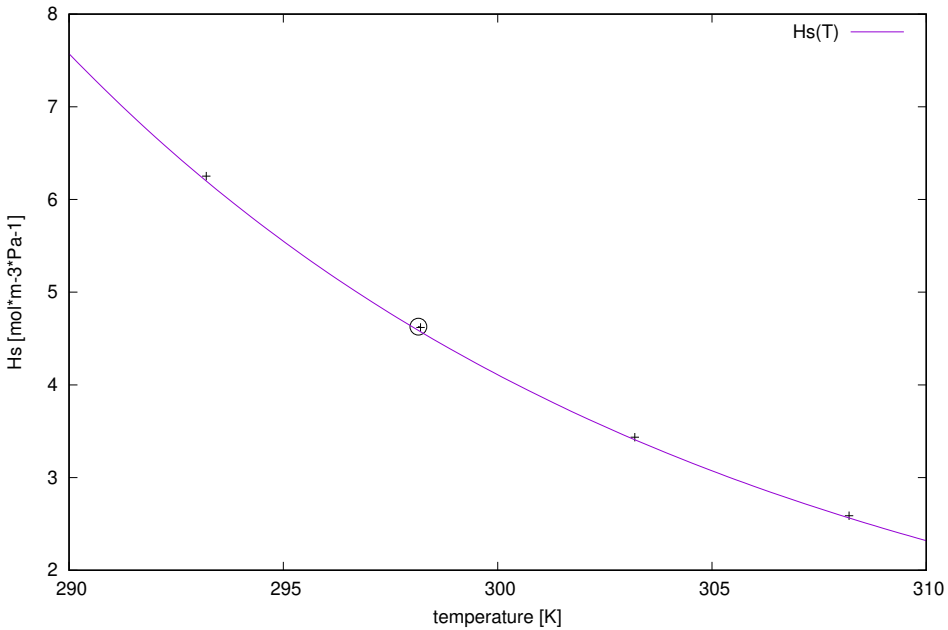

ref = 3638; chem = propanal; casrn = 123-38-6; r2 = 1.00000

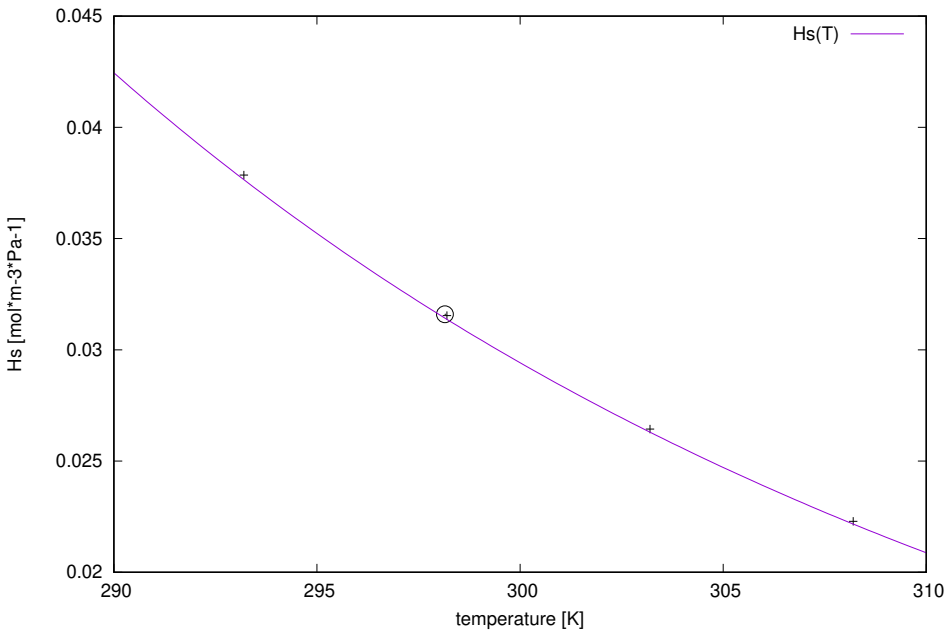



ref = 3638; chem = butanal; casrn = 123-72-8; r2 = 1.00000

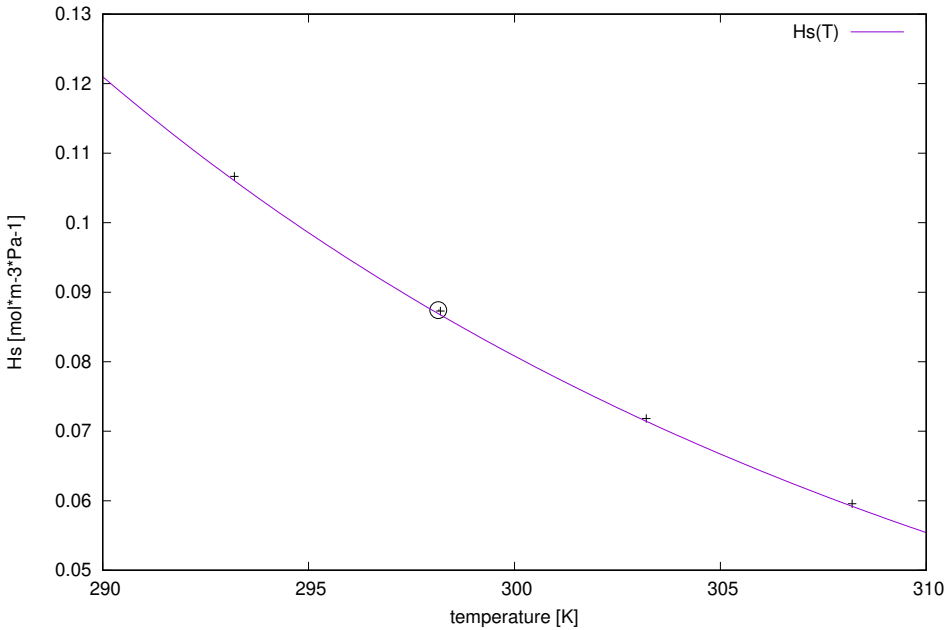

ref = 3638; chem = methyl propanoate; casrn = 554-12-1; r2 = 1.00000

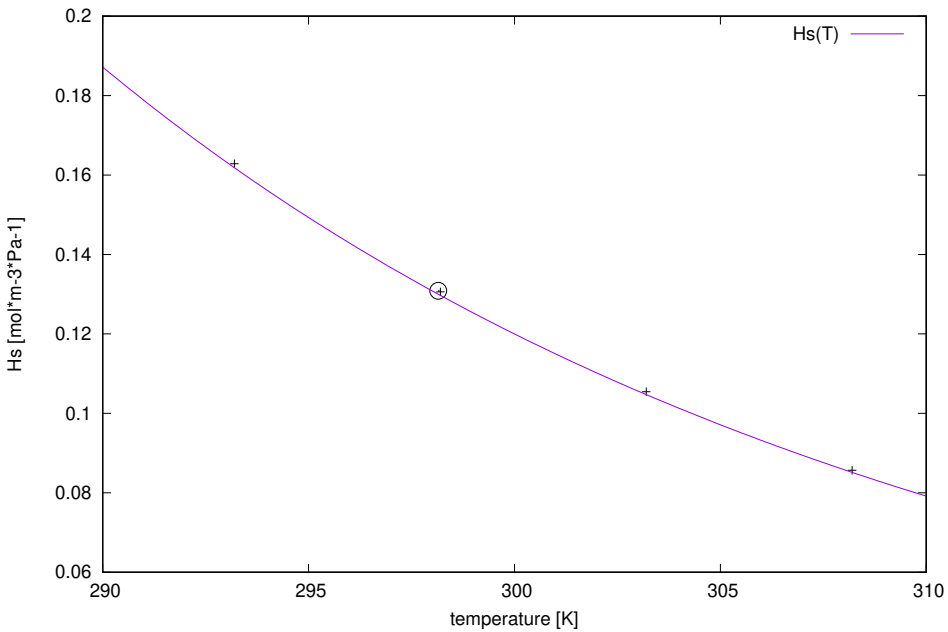

ref = 3638; chem = 2-hexanone; casrn = 591-78-6; r2 = 1.00000

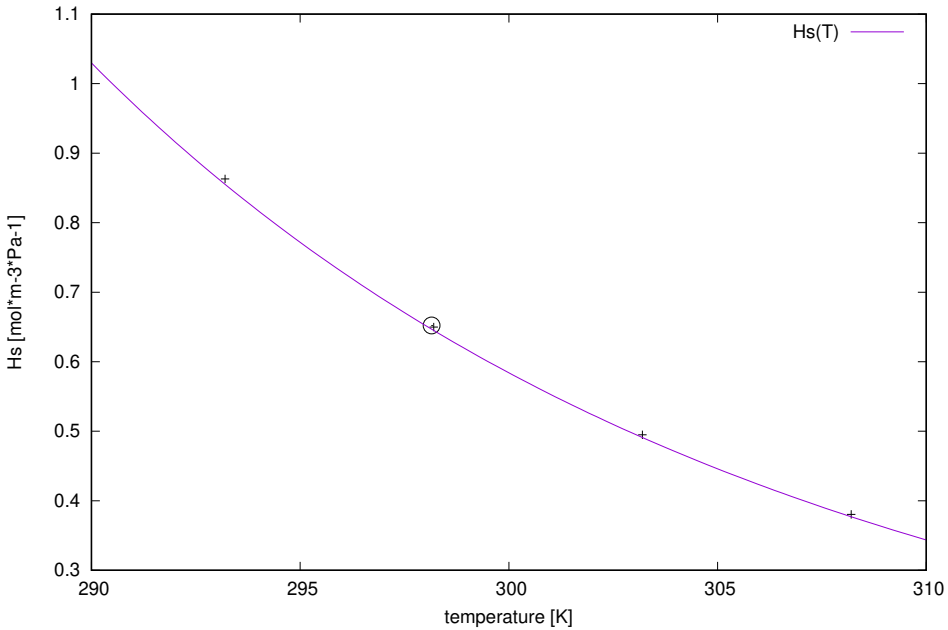

ref = 3638; chem = methyl butanoate; casrn = 623-42-7; r2 = 1.00000

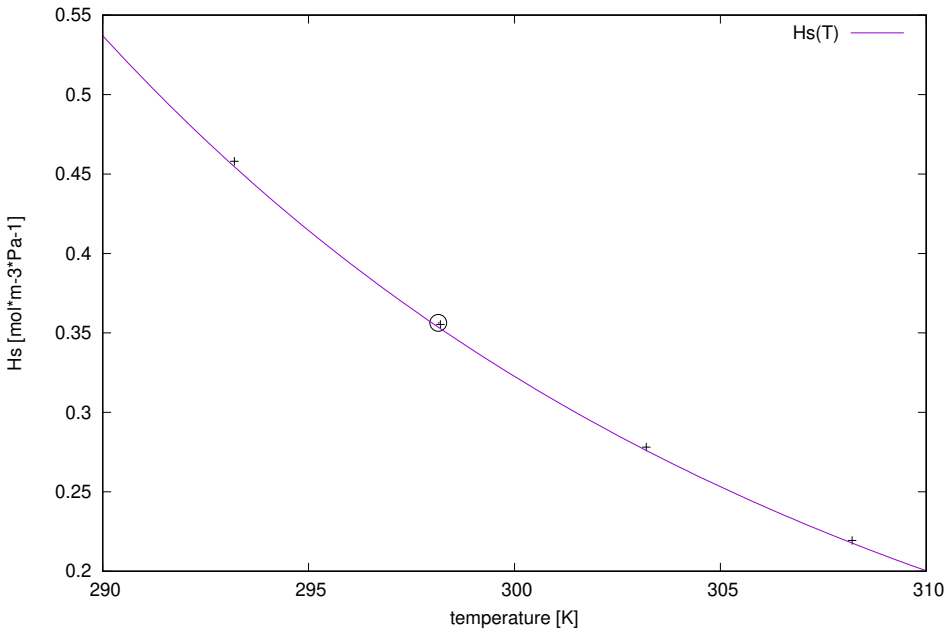

ref = 3638; chem = methyl pentanoate; casrn = 624-24-8; r2 = 1.00000

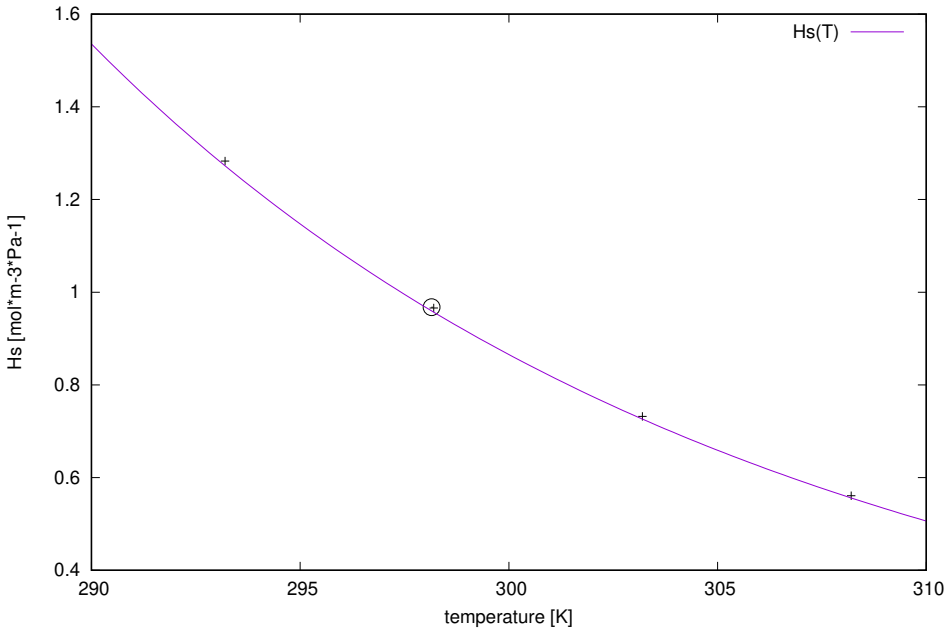

ref = 3638; chem = propanone; casrn = 67-64-1; r2 = 1.00000

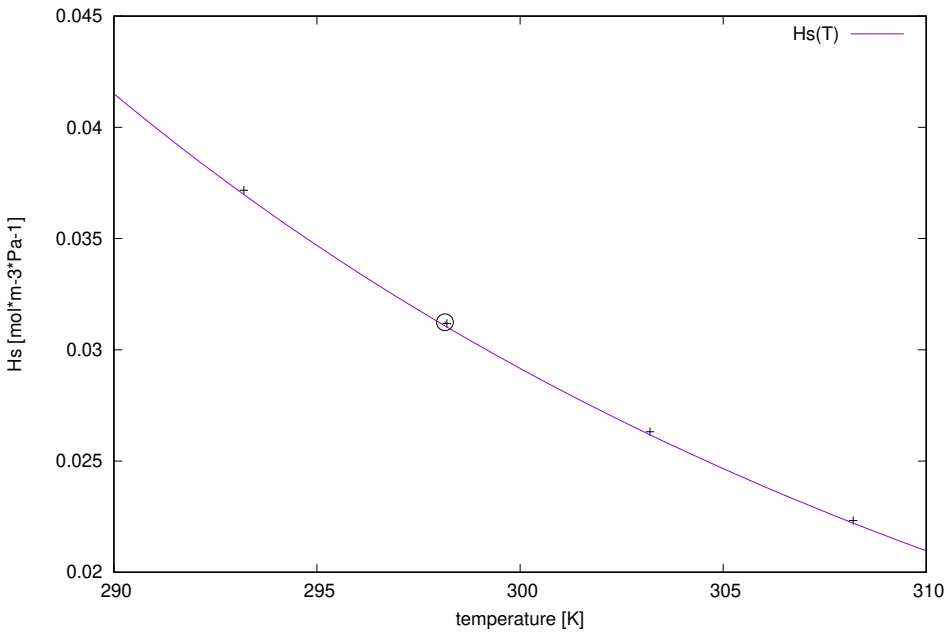

ref = 3638; chem = 1-propanol; casrn = 71-23-8; r2 = 1.00000

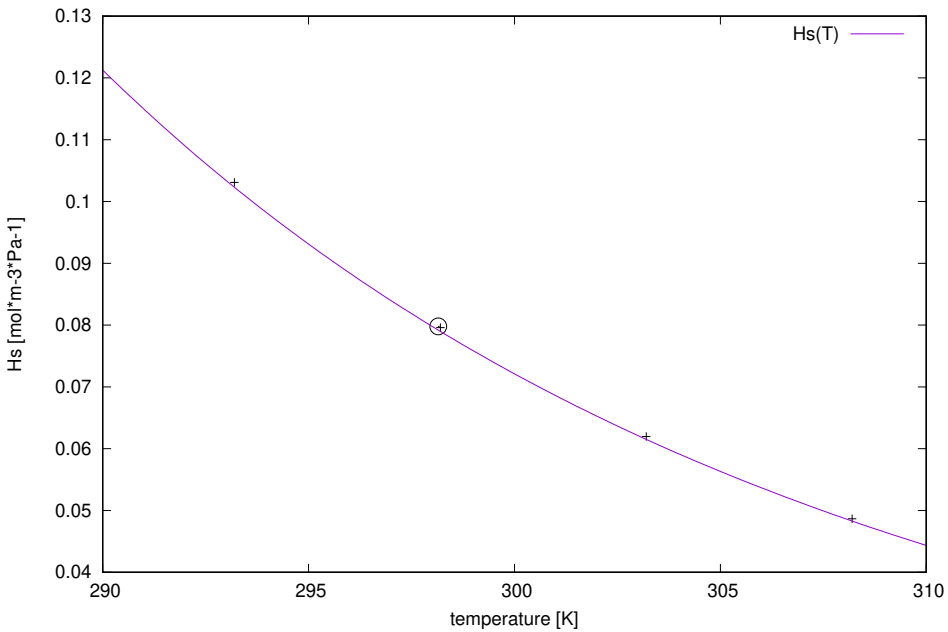

ref = 3638; chem = 1-butanol; casrn = 71-36-3; r2 = 1.00000

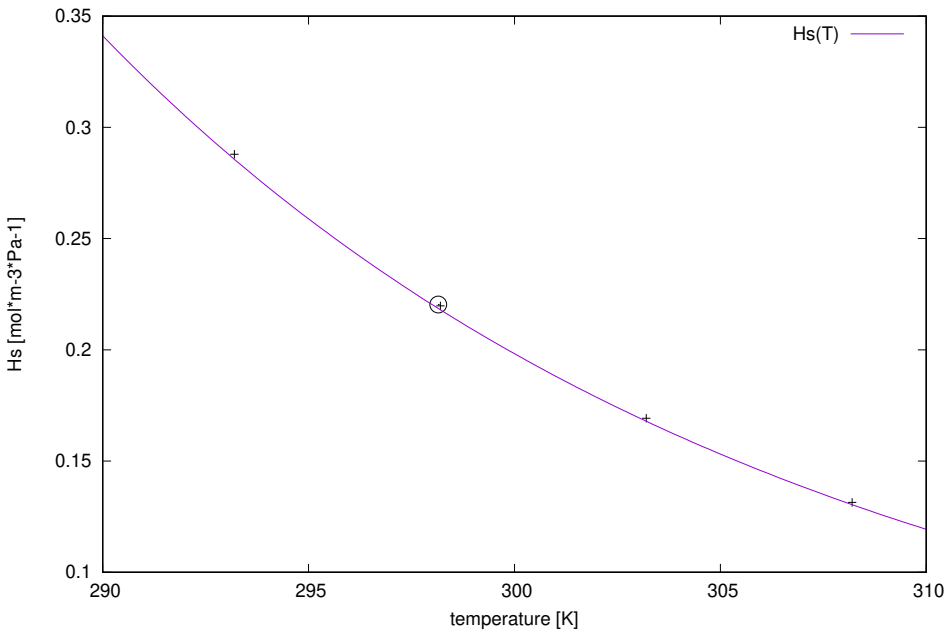



ref = 3638; chem = 1-pentanol; casrn = 71-41-0; r2 = 1.00000

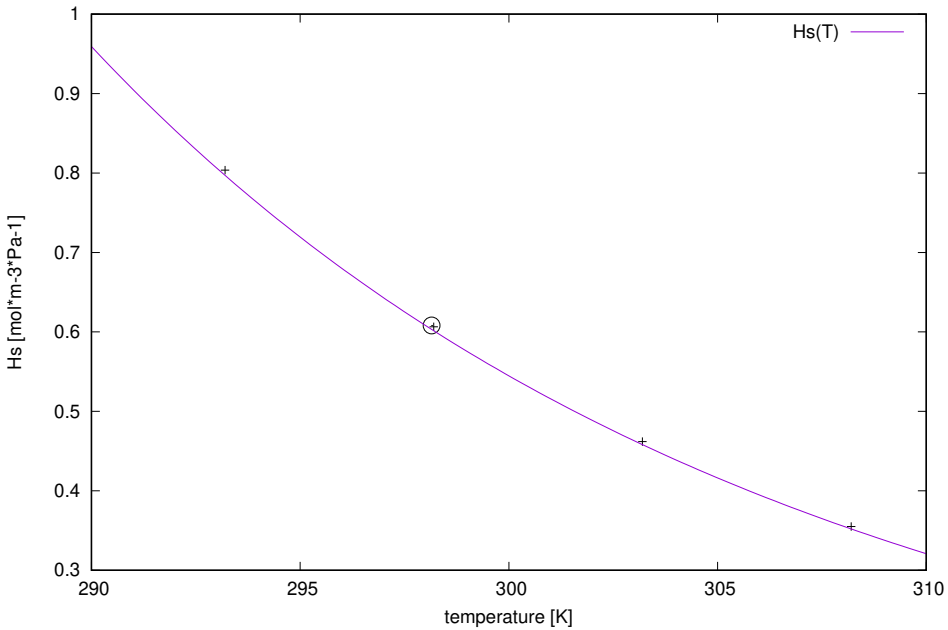

ref = 3638; chem = butanone; casrn = 78-93-3; r2 = 1.00000

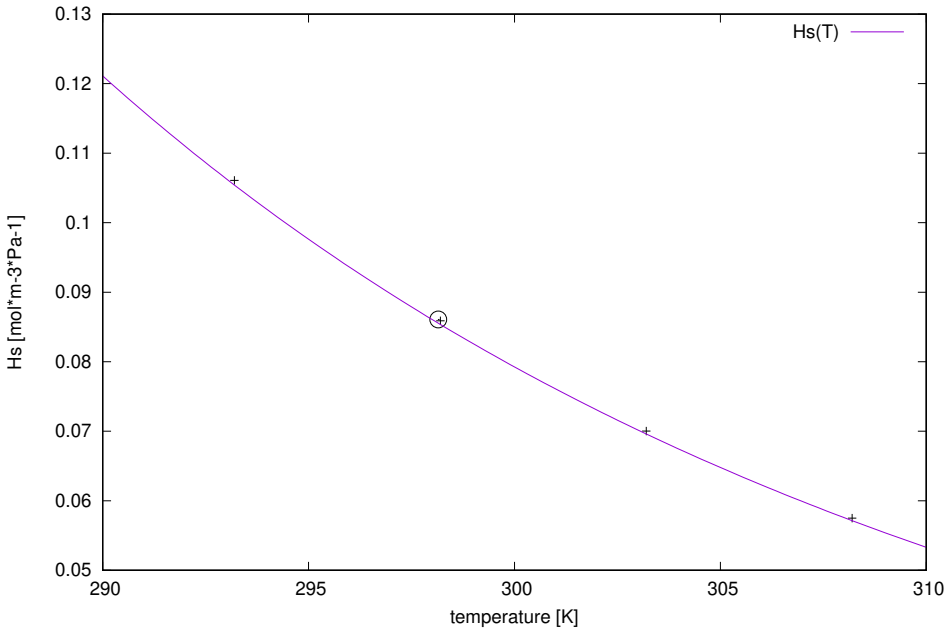

ref = 3638; chem = methyl ethanoate; casrn = 79-20-9; r2 = 0.99999

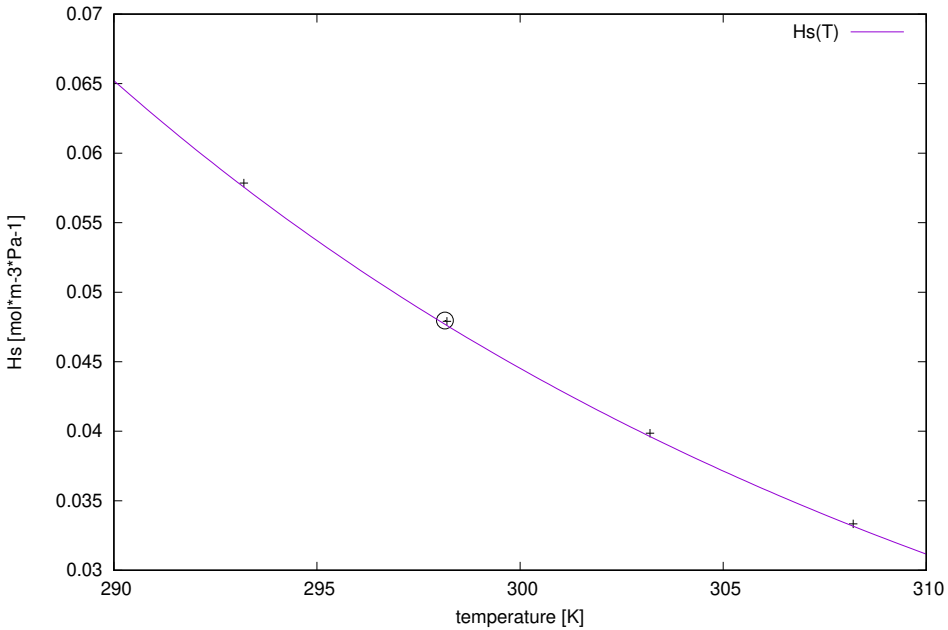

ref = 3640; chem = butyl ethanoate; casrn = 123-86-4; r2 = 0.99985

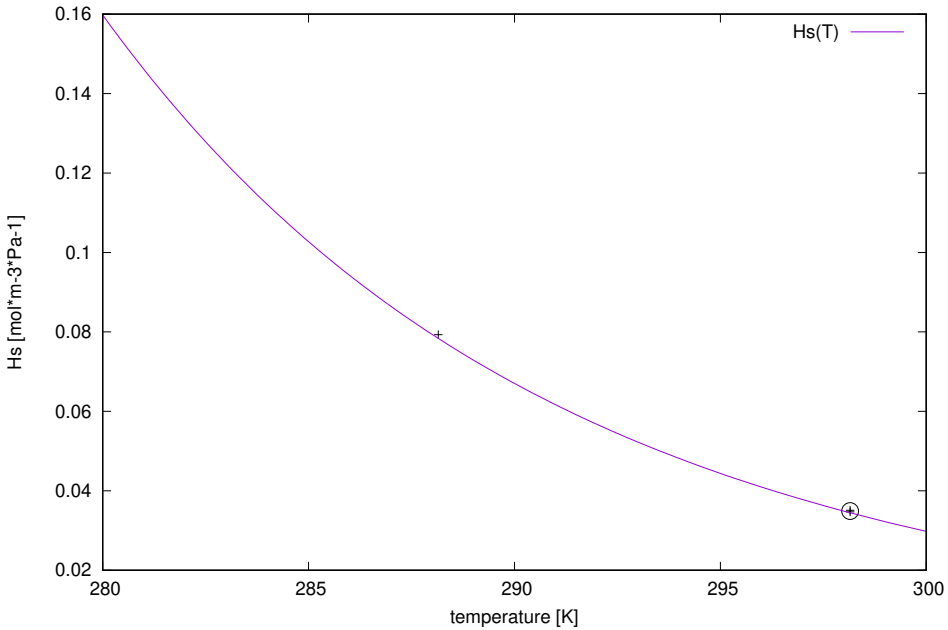

ref = 3640; chem = propanone; casrn = 67-64-1; r2 = 1.00000

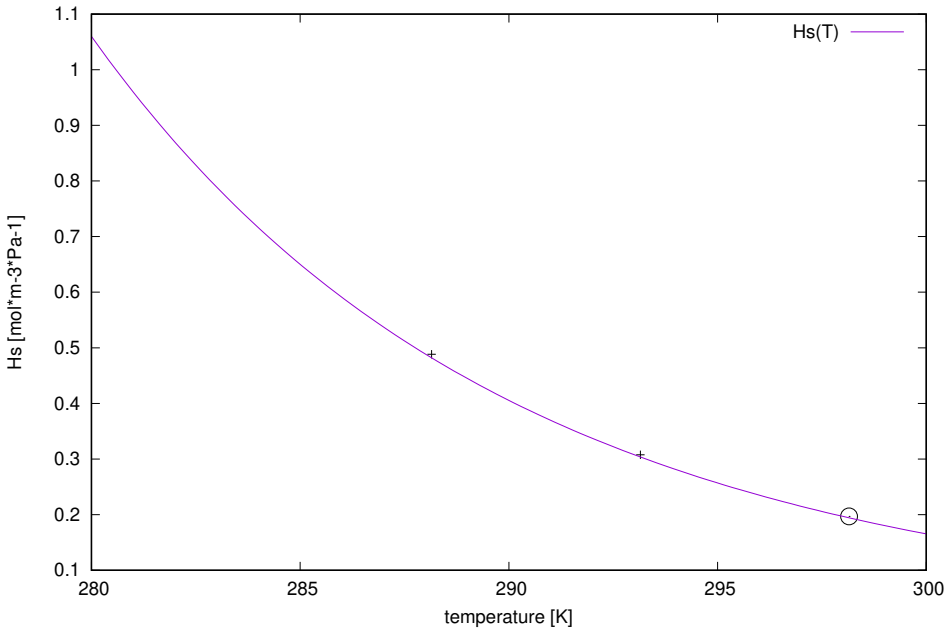

ref = 3641; chem = methyl ethanoate; casrn = 79-20-9; r2 = 1.00000

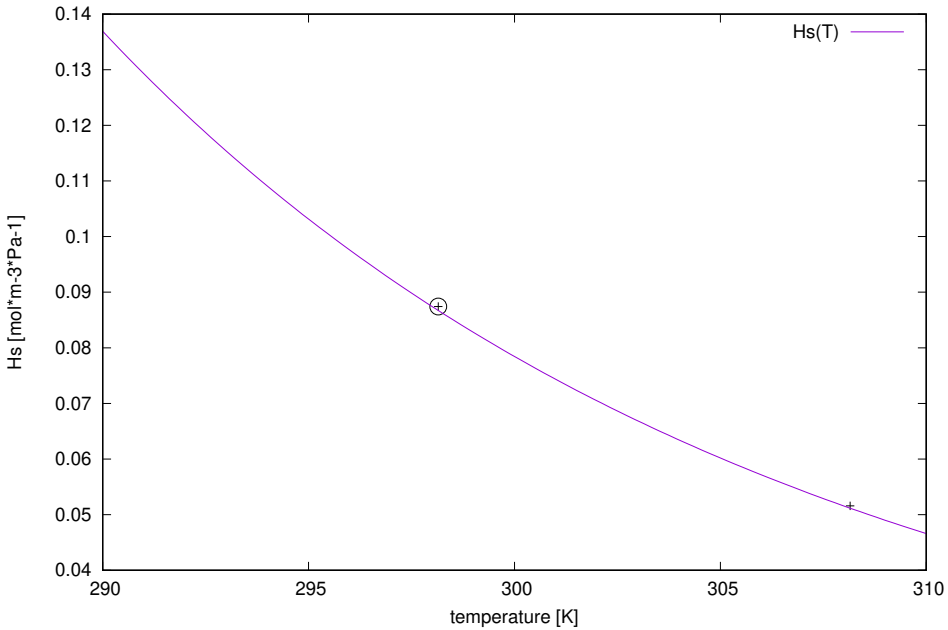

ref = 3648; chem = tetrahydrofuran; casrn = 109-99-9; r2 = 0.99607

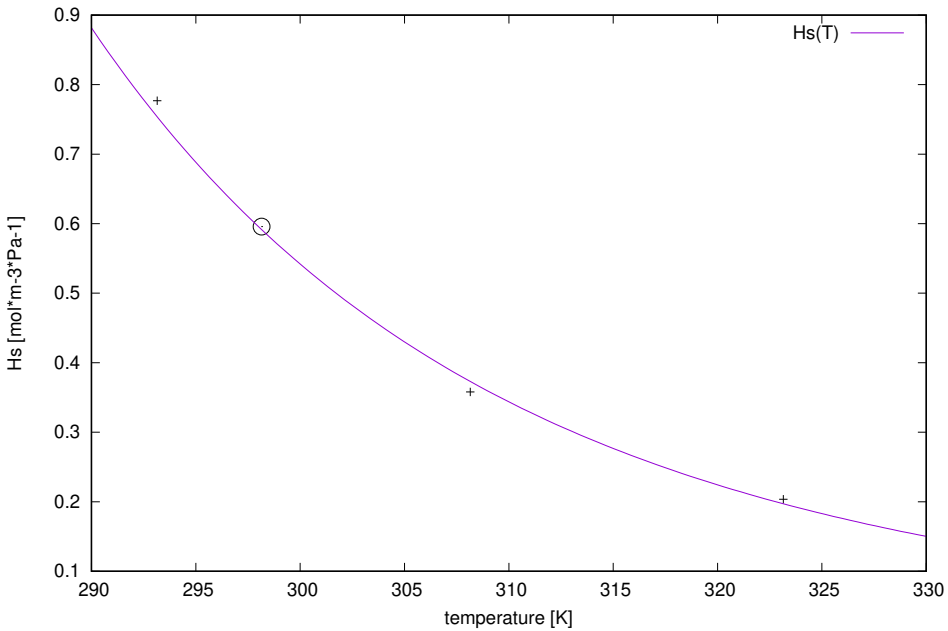

ref = 3648; chem = ethanol; casrn = 64-17-5; r2 = 0.92332

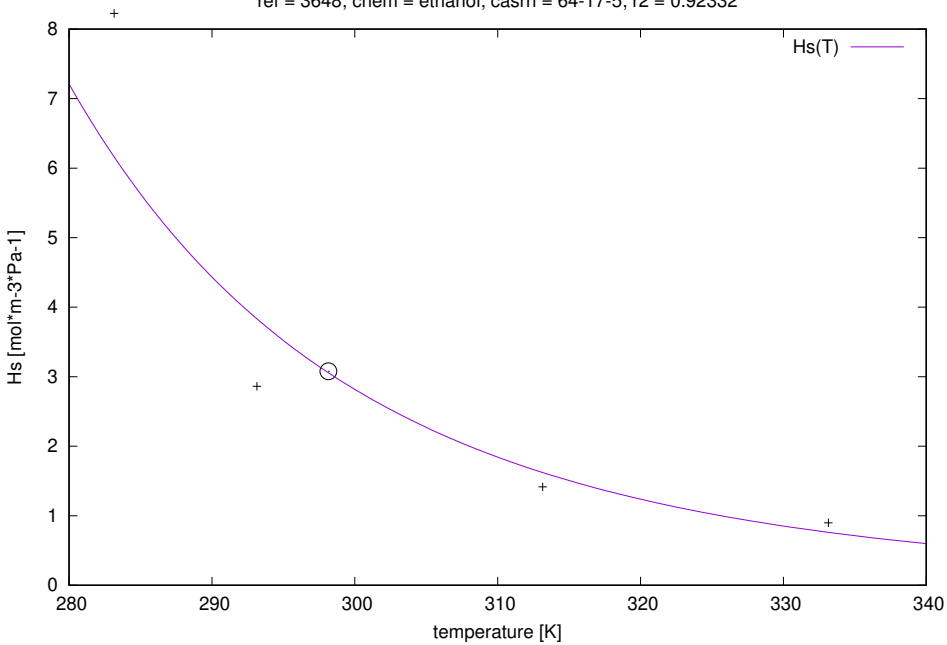



ref = 3648; chem = methanol; casrn = 67-56-1; r2 = 0.99996

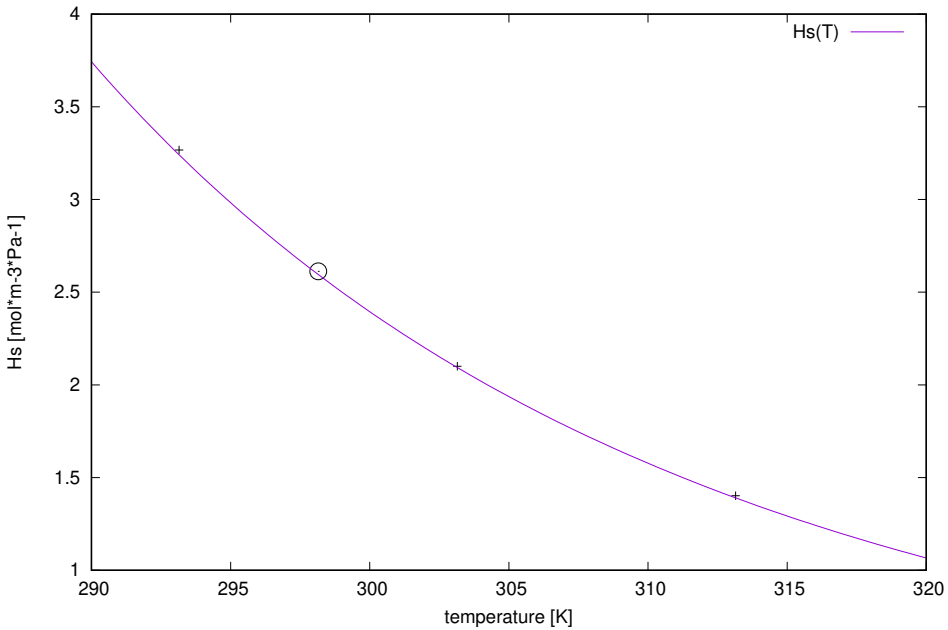

ref = 3654; chem = N-methyl-diethanolamine; casrn = 105-59-9; r2 = 0.99671

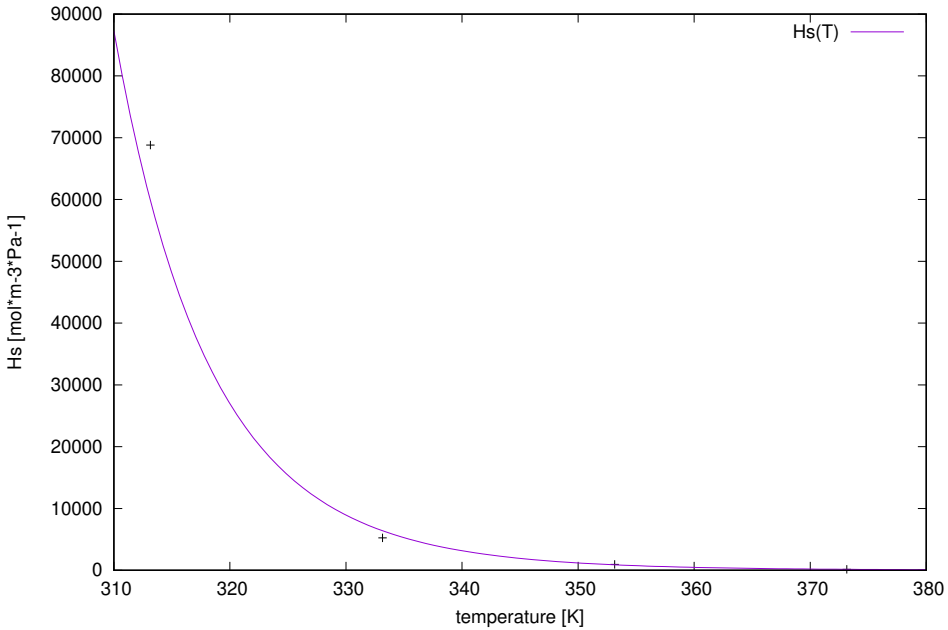

ref = 3654; chem = ethanolamine; casrn = 141-43-5; r2 = 0.99906

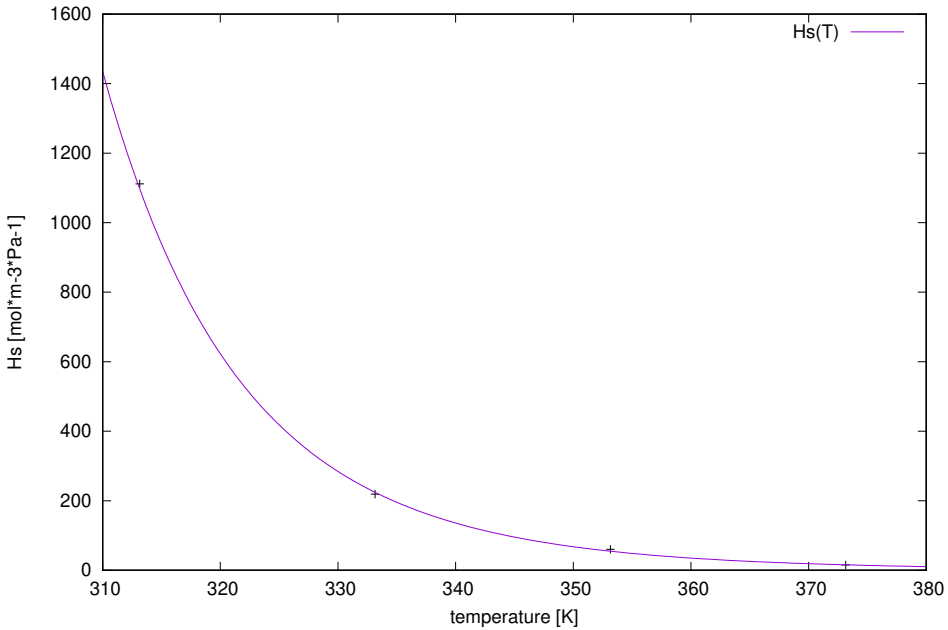

ref = 3654; chem = C4H12N2; casrn = 6291-84-5; r2 = 0.99992

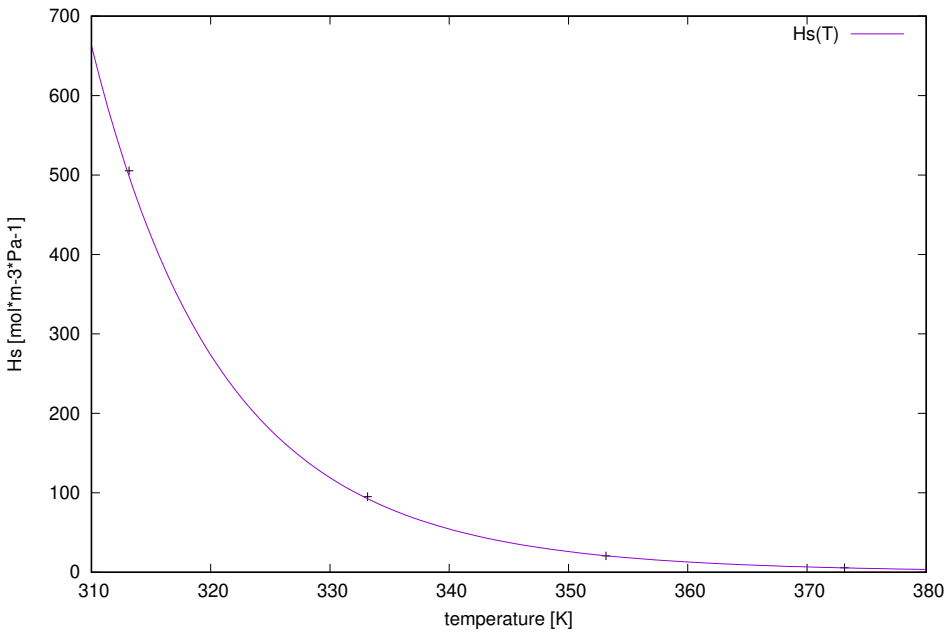

ref = 3658; chem = tert-butyl chloride; casrn = 507-20-0; r2 = 0.99253

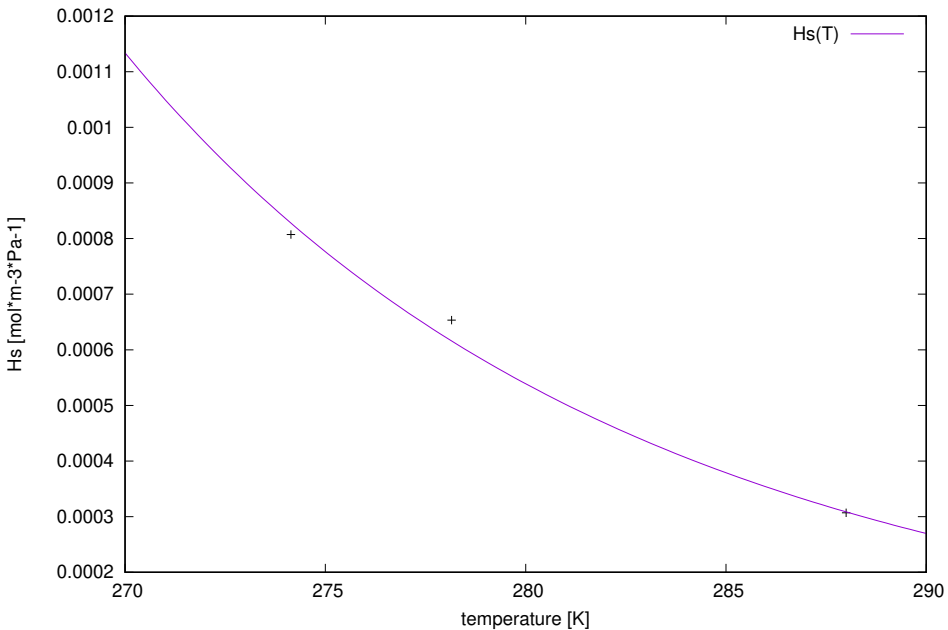

ref = 3660; chem = ethanol; casrn = 64-17-5; r2 = 0.99938

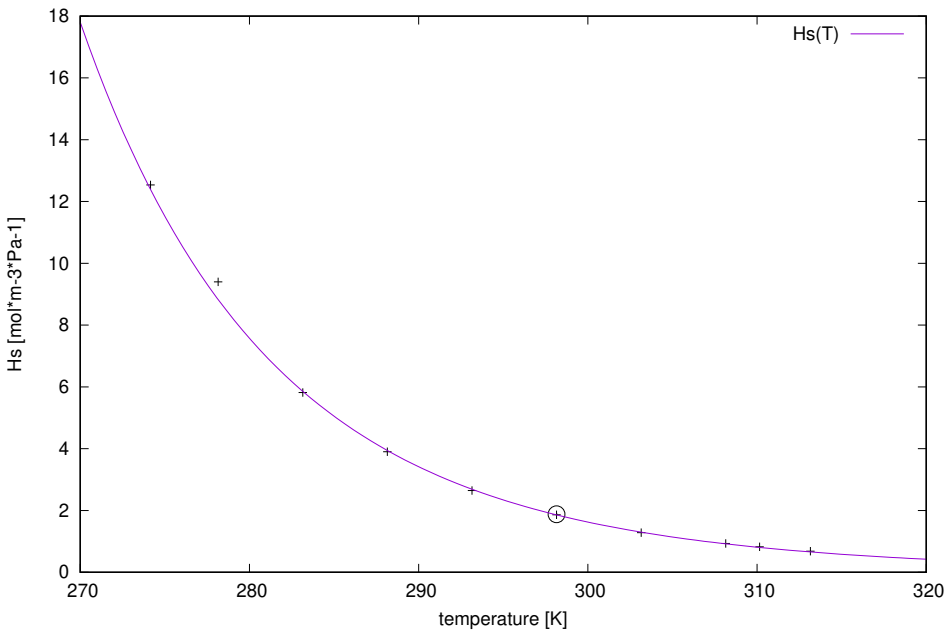

ref = 3667; chem = acetone; casrn = 67-64-1; r2 = 0.99915

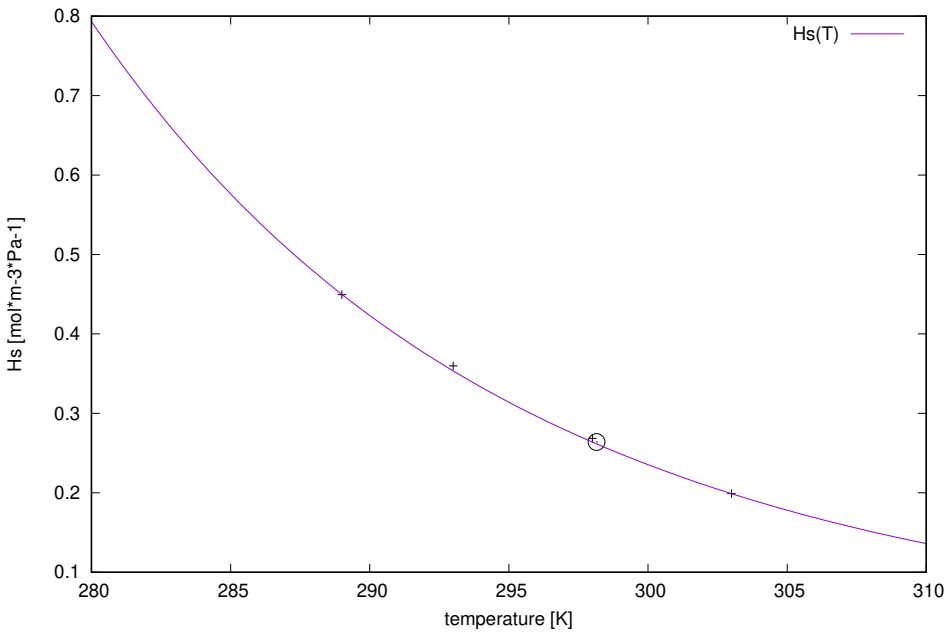

ref = 3668; chem = methanethiol; casrn = 74-93-1; r2 = 1.00000

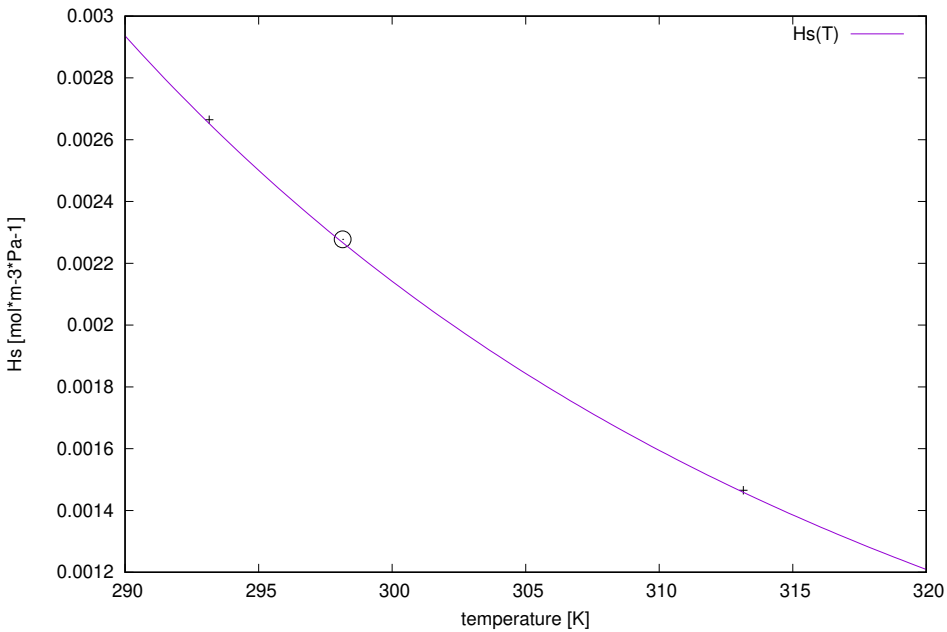



ref = 3668; chem = dimethyl sulfide; casrn = 75-18-3; r2 = 1.00000

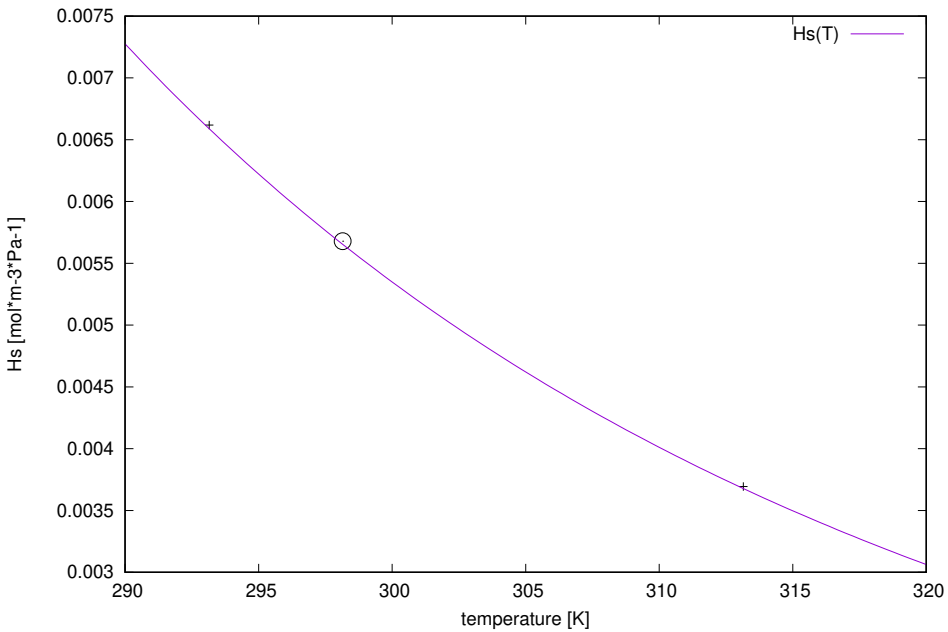

ref = 3668; chem = trimethylamine; casrn = 75-50-3; r2 = 1.00000

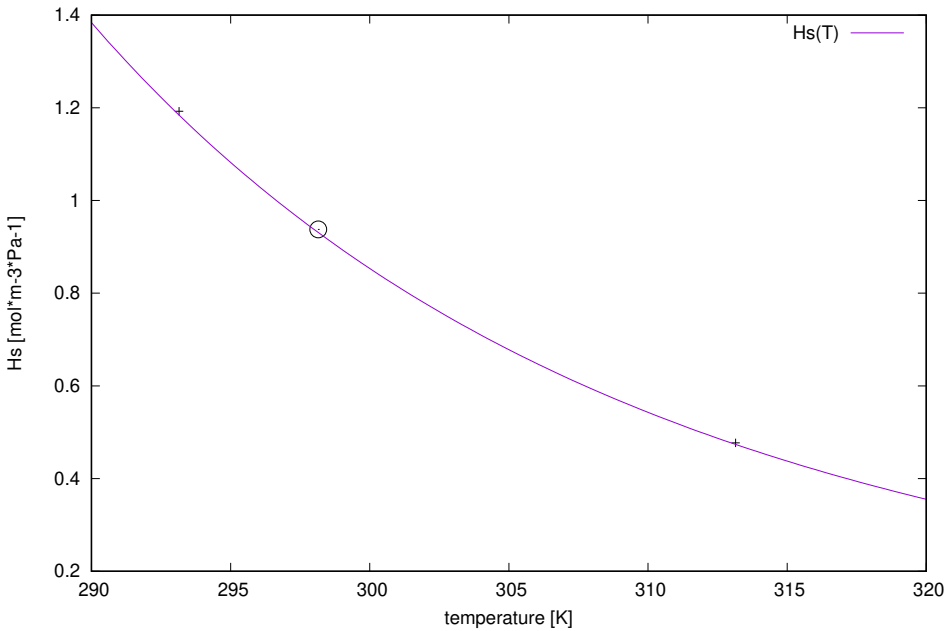

ref = 3668; chem = ammonia; casrn = 7664-41-7; r2 = 1.00000

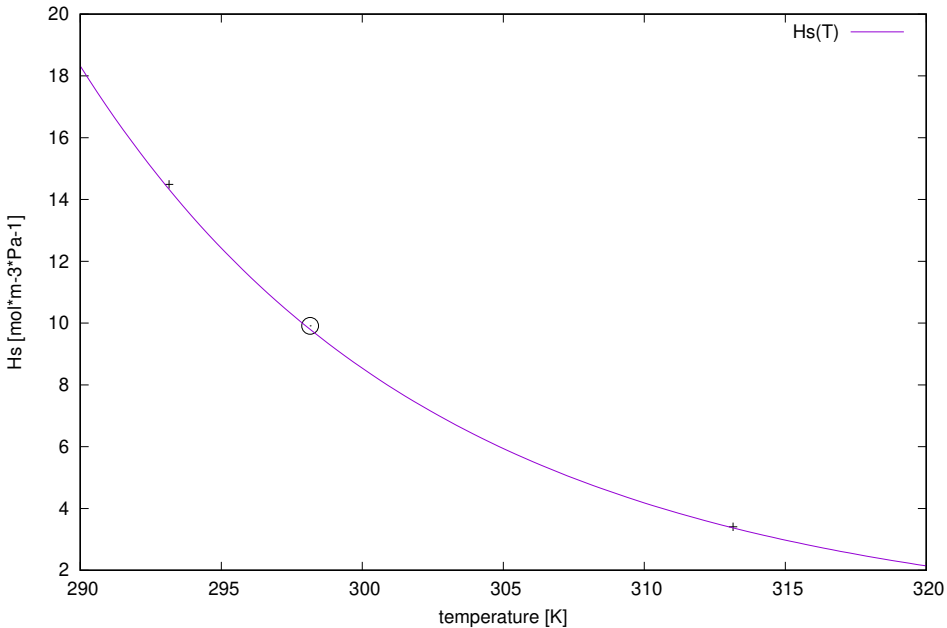

ref = 3668; chem = hydrogen sulfide; casrn = 7783-06-4; r2 = 1.00000

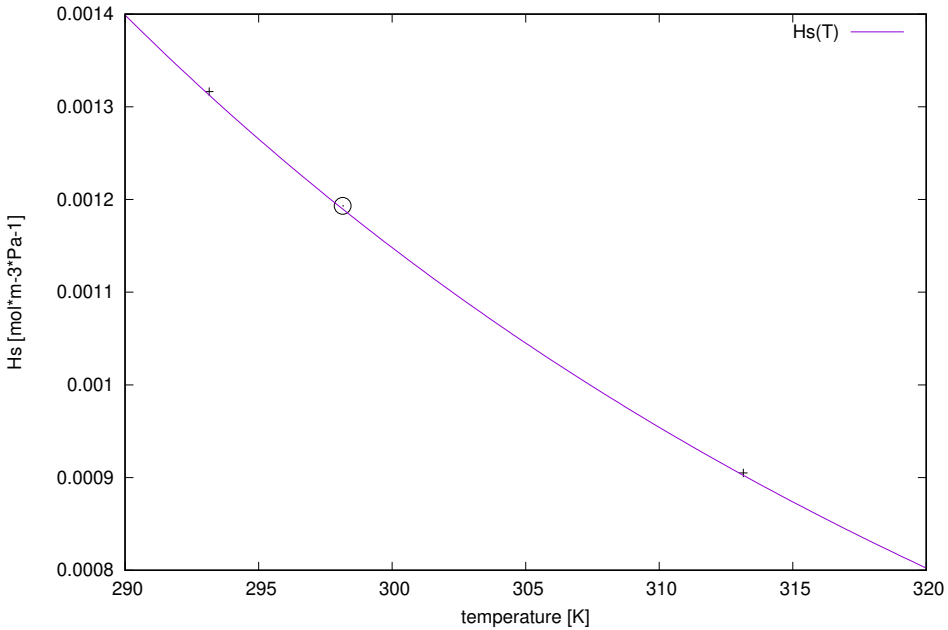

ref = 3680; chem = N-nitrosodiethylamine; casrn = 55-18-5; r2 = 0.99848

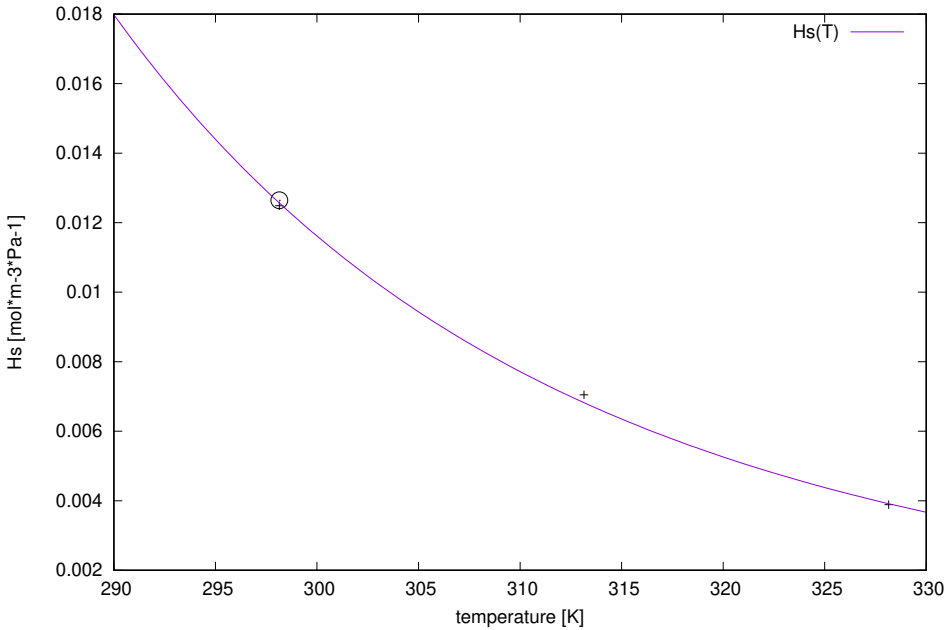

ref = 3680; chem = N-nitrosodimethylamine; casrn = 62-75-9; r2 = 0.96224

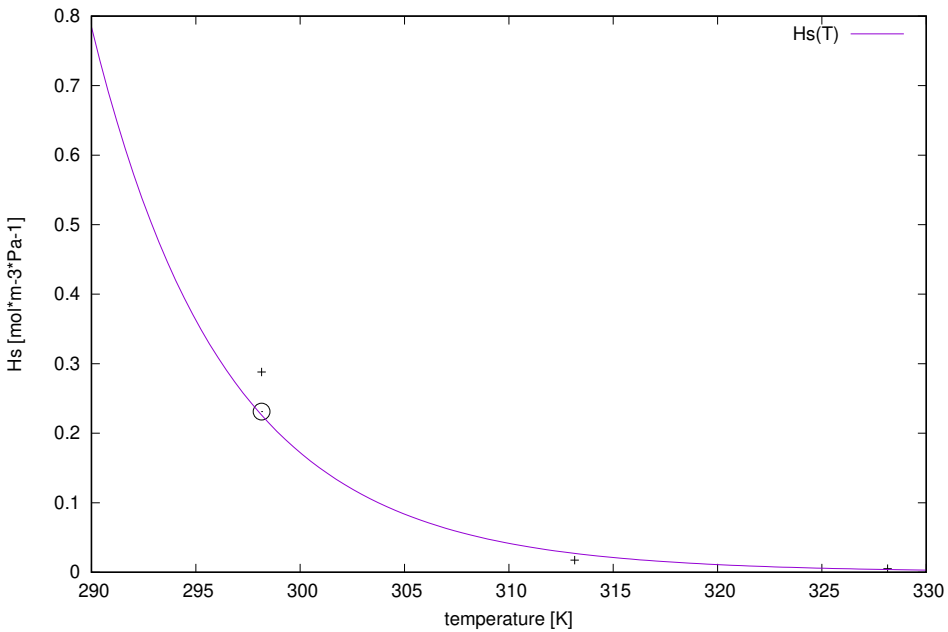

ref = 3681; chem = ethylbenzene; casrn = 100-41-4; r2 = 0.99734

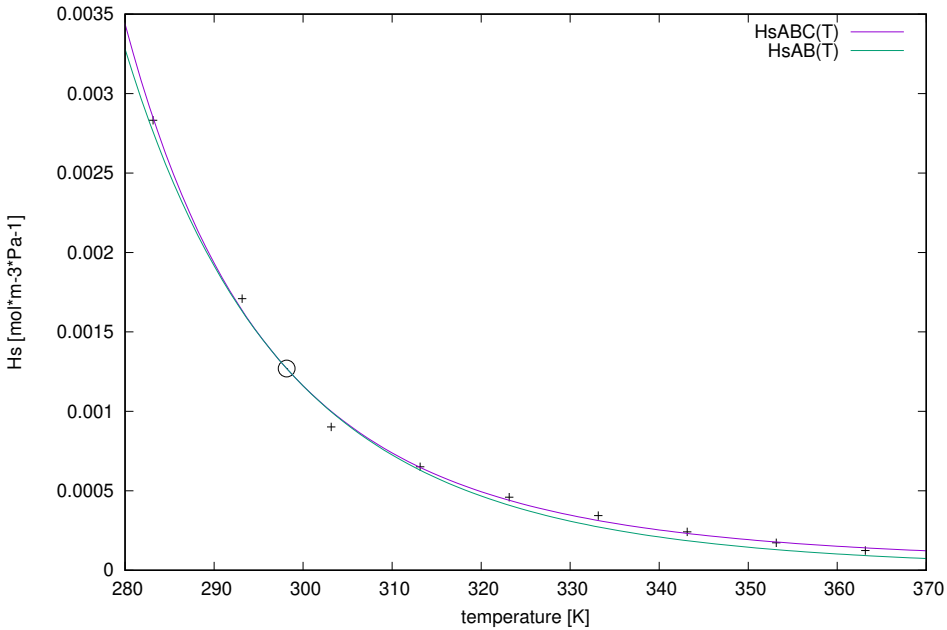

ref = 3681; chem = 1,4-dimethylbenzene; casrn = 106-42-3; r2 = 0.99413

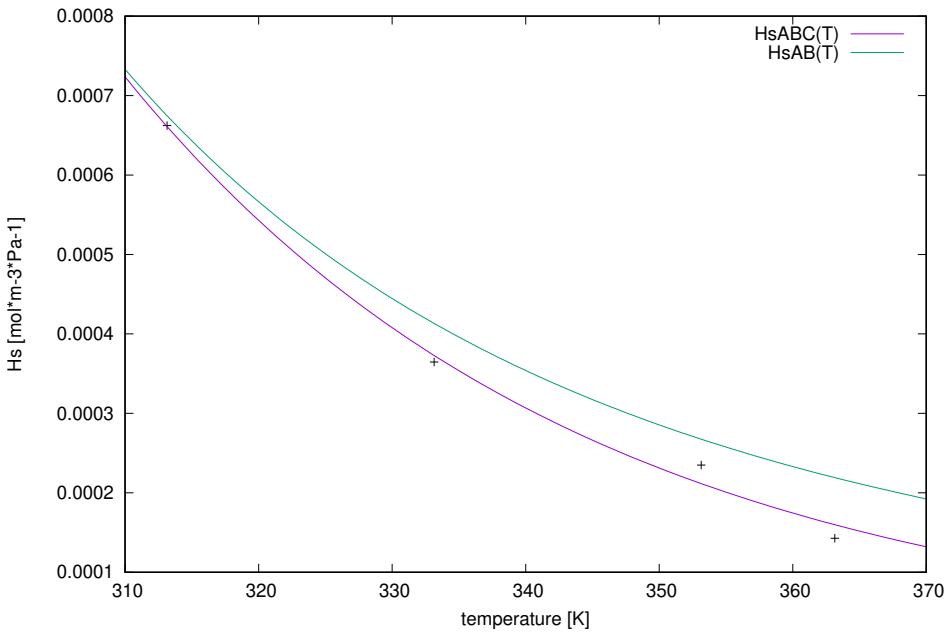



ref = 3681; chem = chlorobenzene; casrn = 108-90-7; r2 = 0.99434

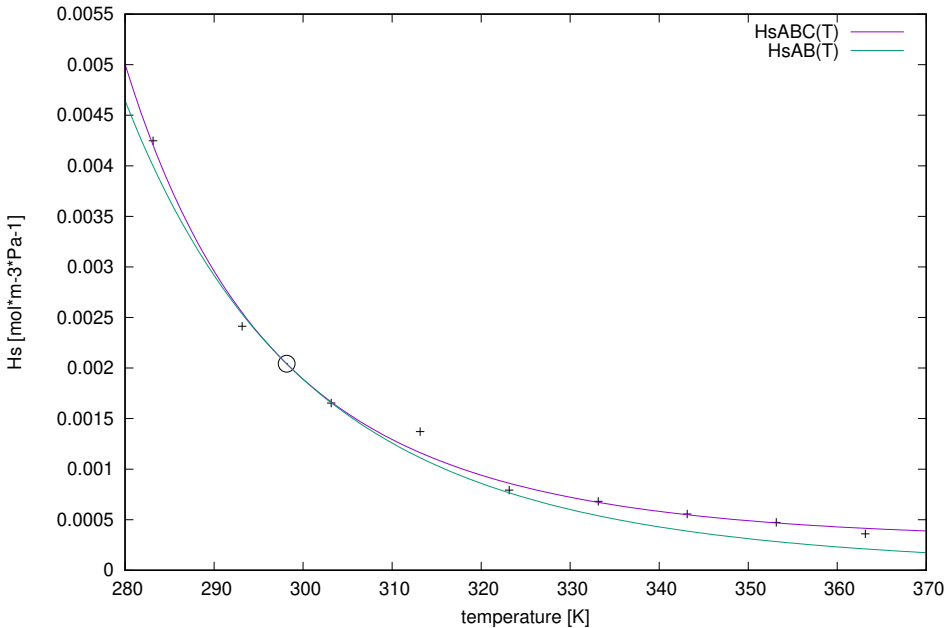

ref = 3681; chem = tetrachloroethene; casrn = 127-18-4; r2 = 0.99942

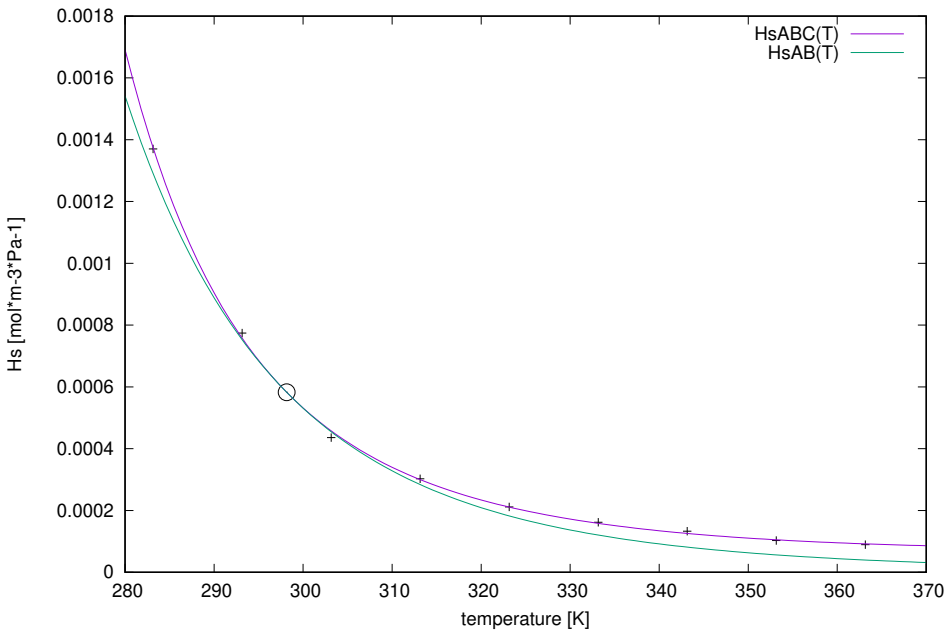

ref = 3681; chem = (\$E\$)-1,2-dichloroethene; casrn = 156-60-5; r2 = 0.99896

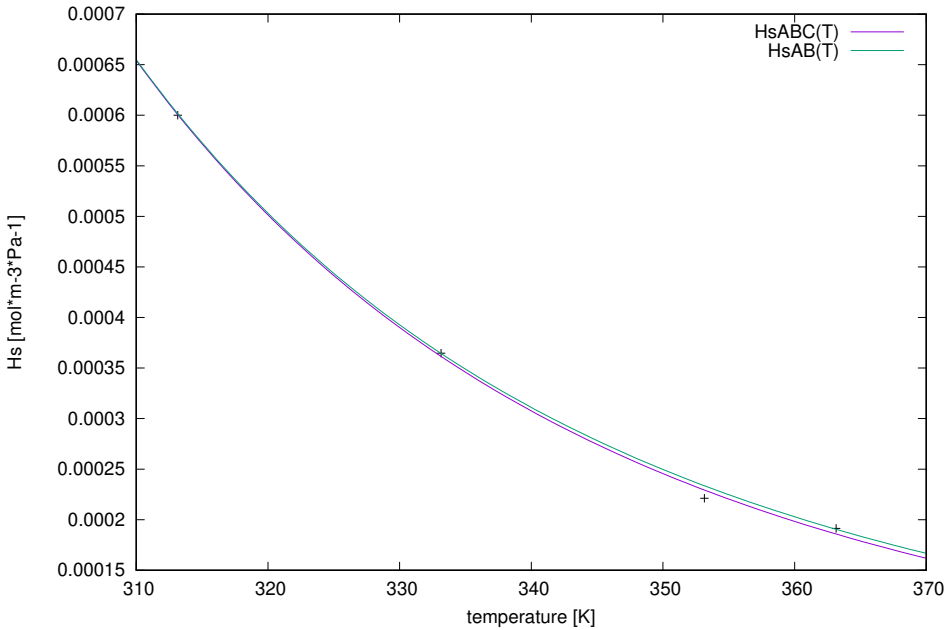

ref = 3681; chem = 1,1,1,2-tetrachloroethane; casrn = 630-20-6; r2 = 0.99893

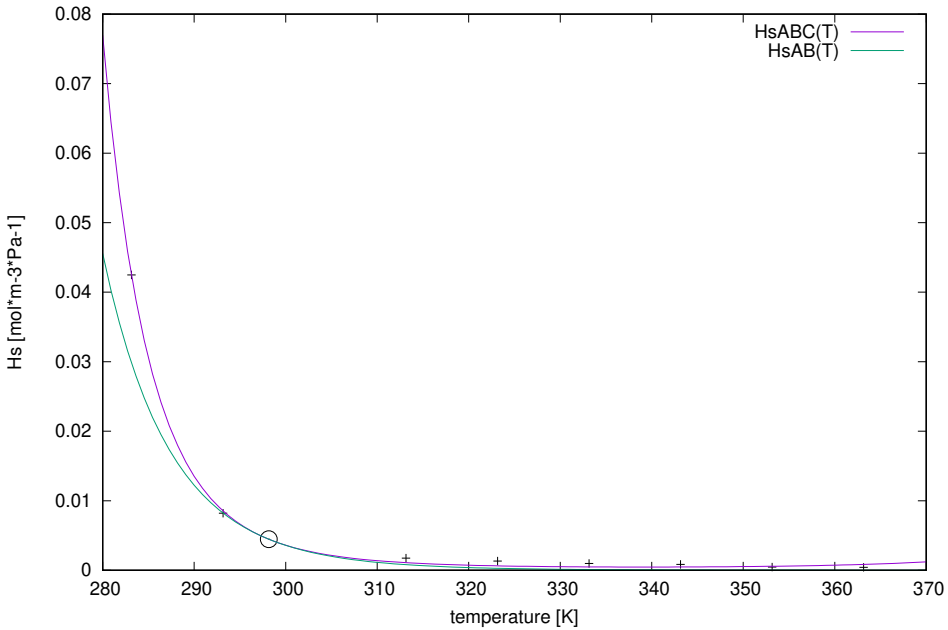

ref = 3681; chem = chloroethene; casrn = 75-01-4; r2 = 0.91308

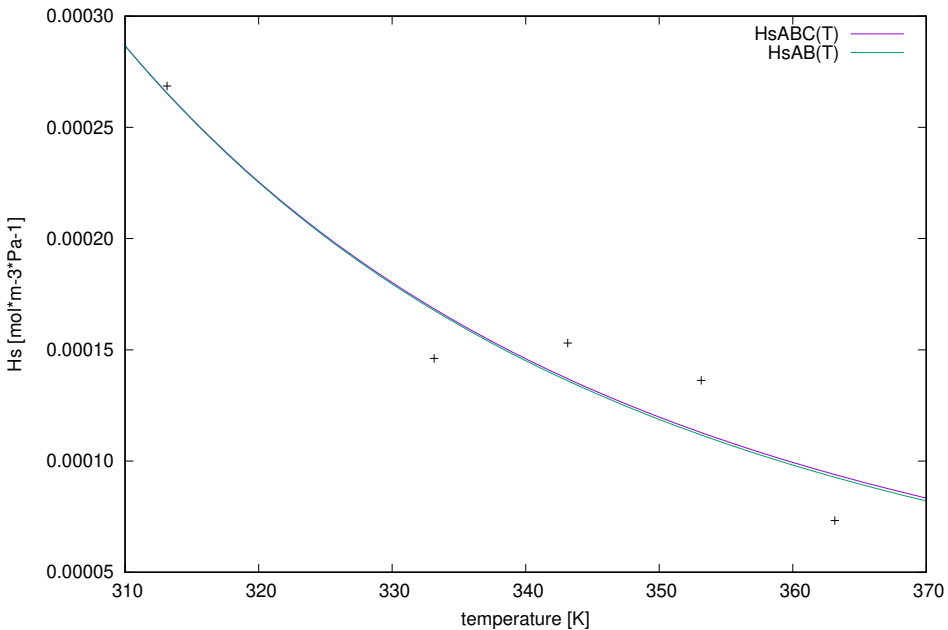

ref = 3681; chem = 1,1-dichloroethene; casrn = 75-35-4; r2 = 0.99746

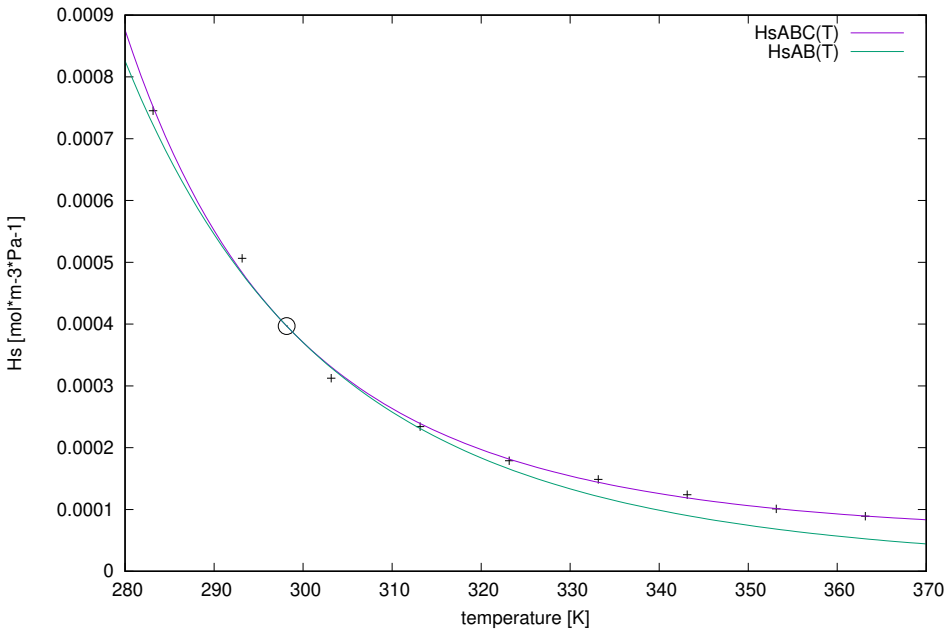

ref = 3681; chem = 1,1,2-trichloroethane; casrn = 79-00-5; r2 = 0.99765

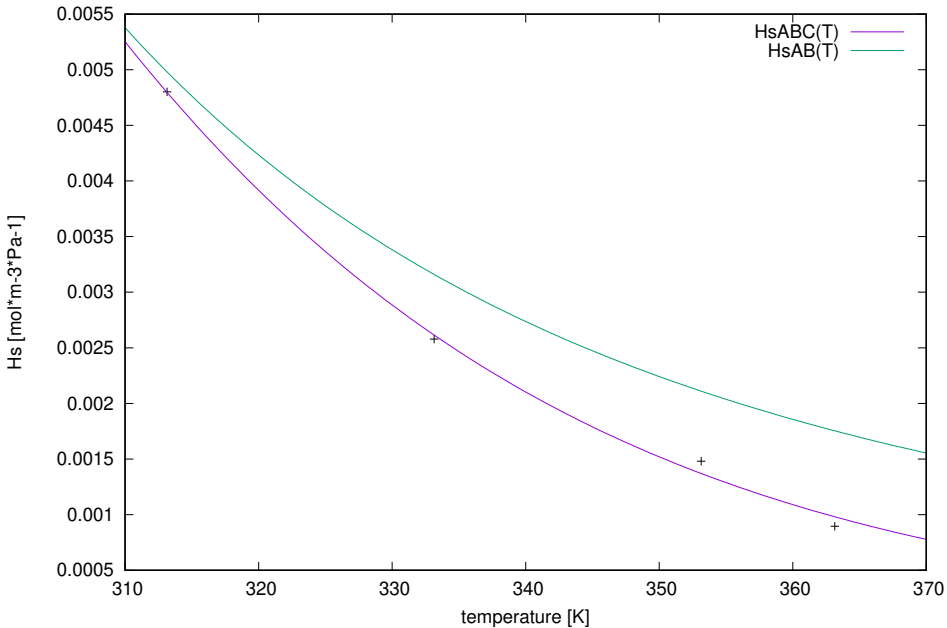

ref = 3681; chem = trichloroethene; casrn = 79-01-6; r2 = 0.99949

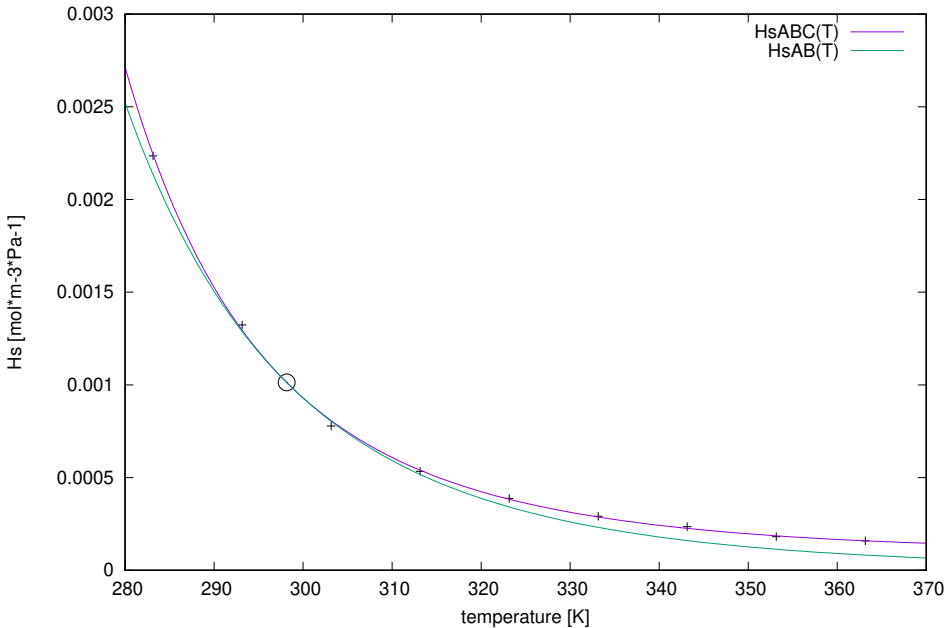



ref = 3683; chem = PBDE-3; casrn = 101-55-3; r2 = 0.98757

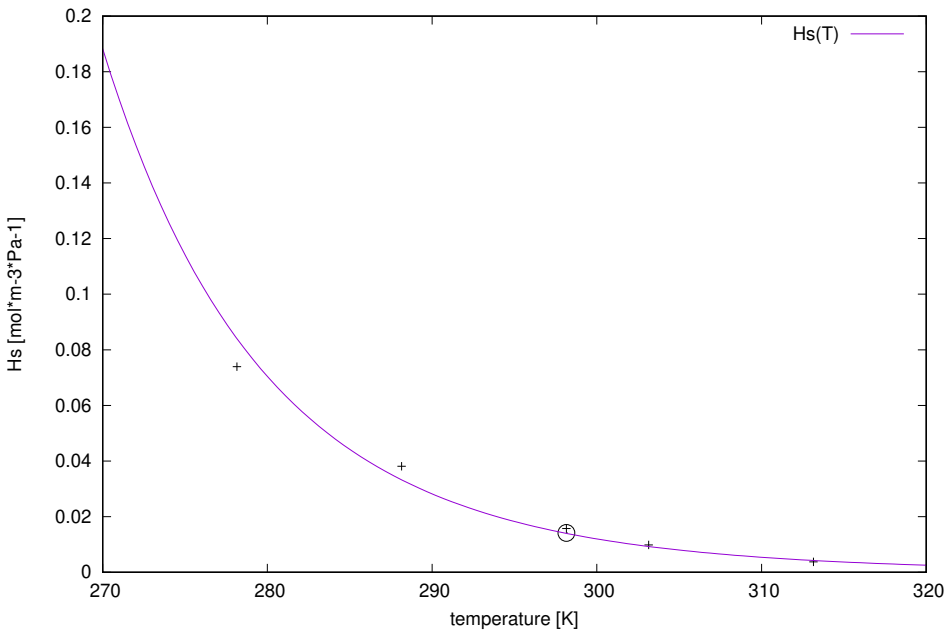

ref = 3683; chem = PBDE-80; casrn = 103173-66-6; r2 = 0.98734

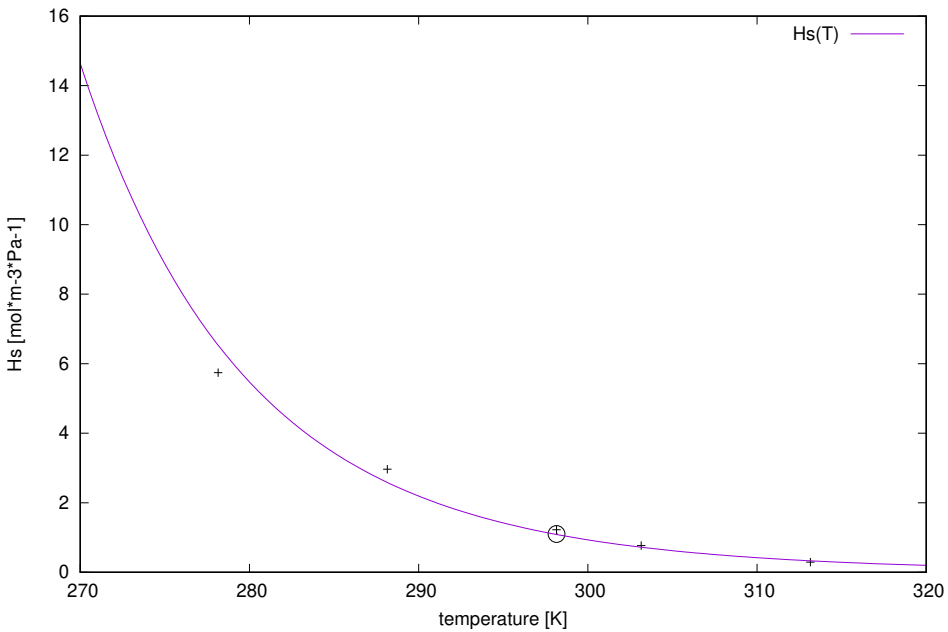

ref = 3683; chem = PBDE-209; casrn = 1163-19-5; r2 = 0.96434

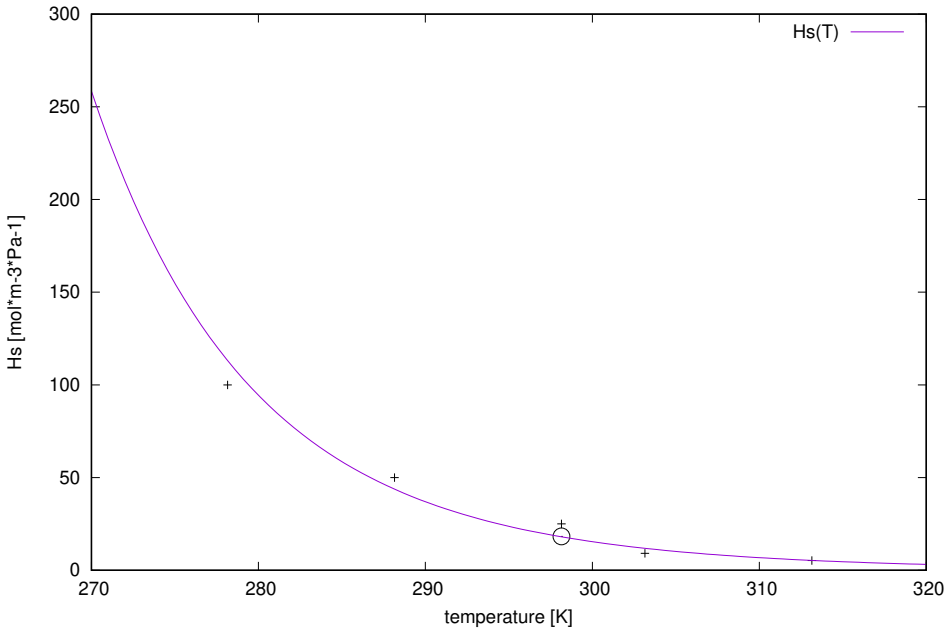

ref = 3683; chem = PBDE-188; casrn = 116995-32-5; r2 = 0.98757

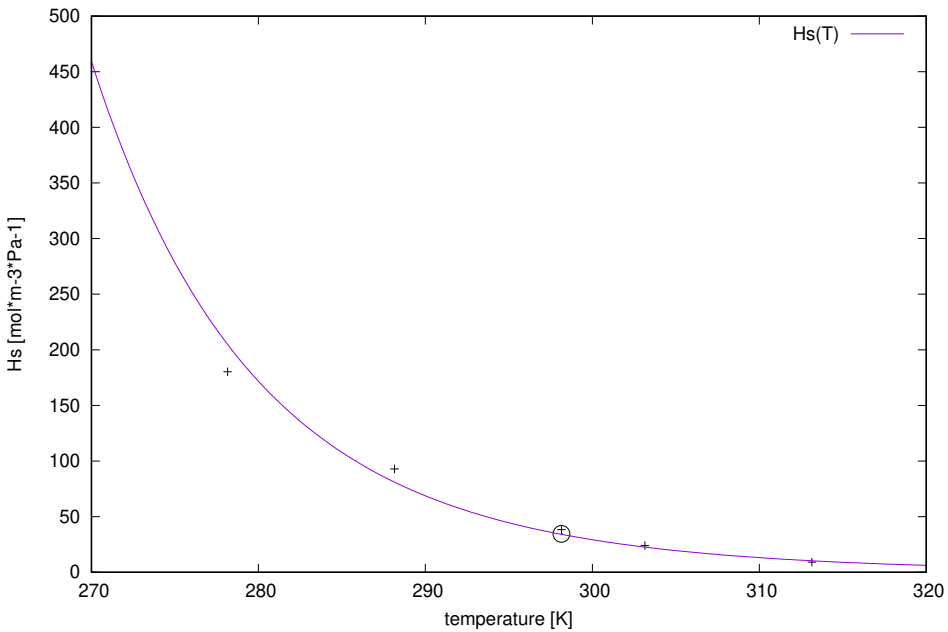

ref = 3683; chem = PBDE-147; casrn = 116995-33-6; r2 = 0.98734

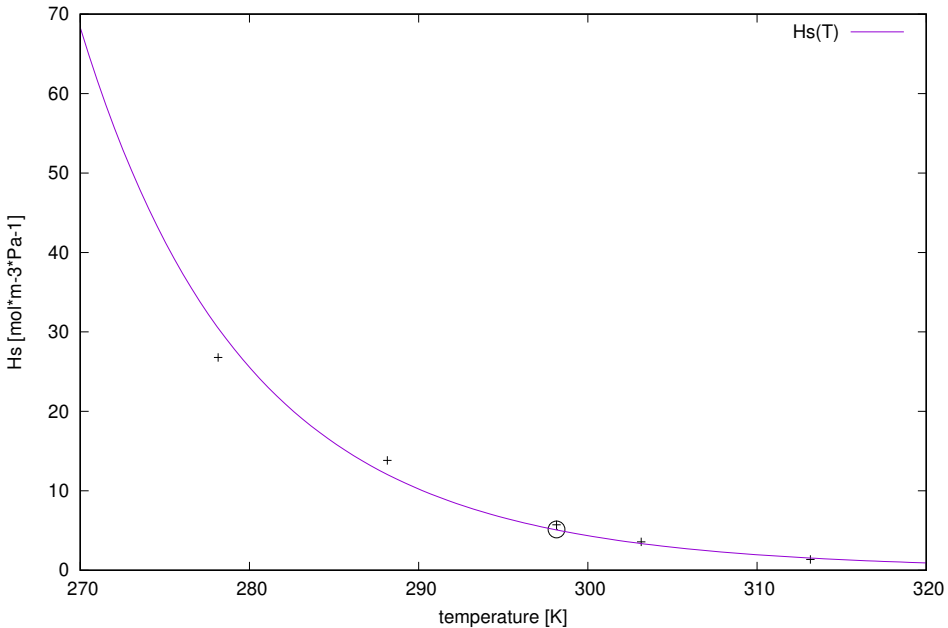

ref = 3683; chem = PBDE-184; casrn = 117948-63-7; r2 = 0.98734

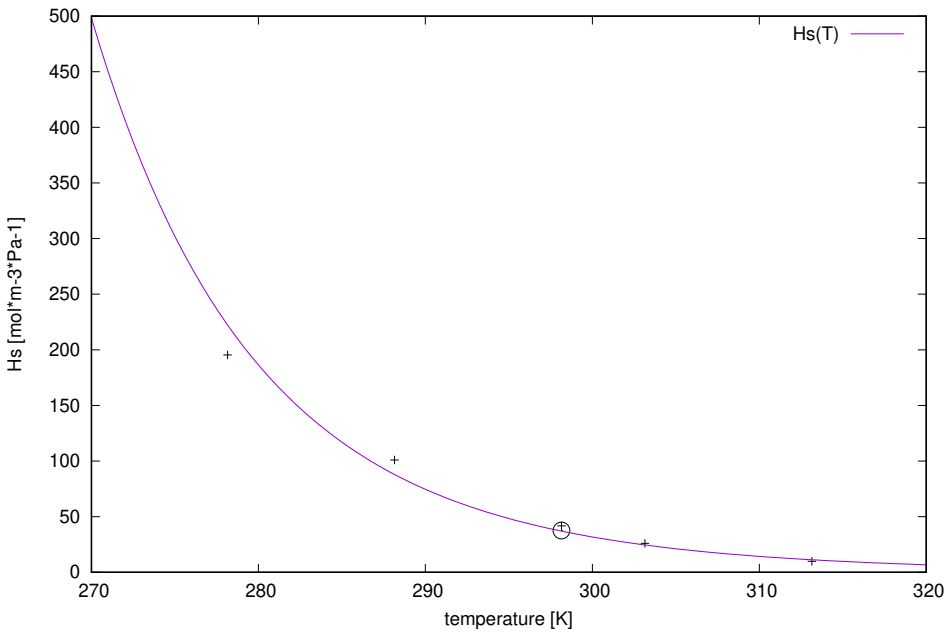

ref = 3683; chem = PBDE-197; casrn = 117964-21-3; r2 = 0.98734

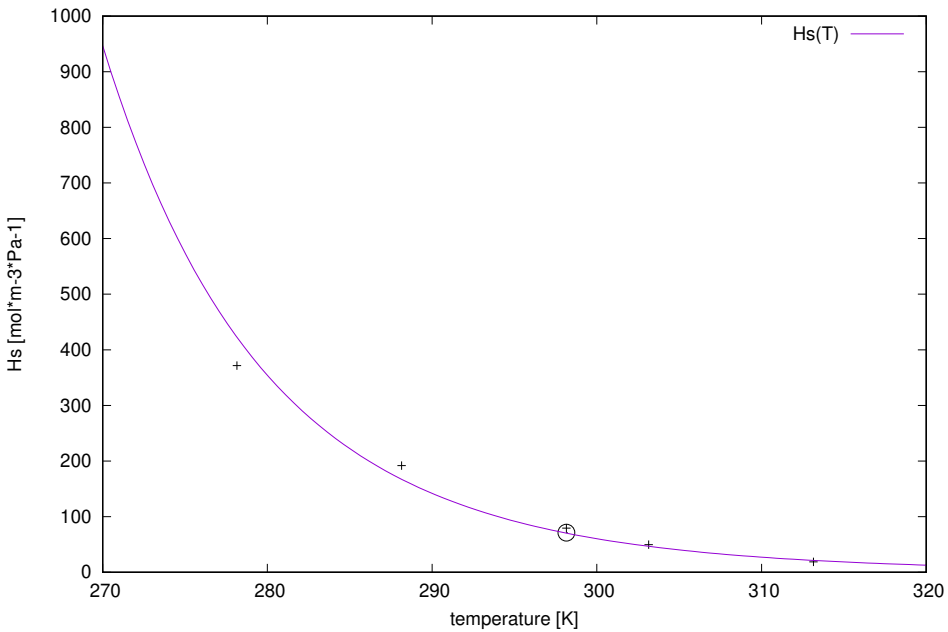

ref = 3683; chem = PBDE-8; casrn = 147217-71-8; r2 = 0.98747

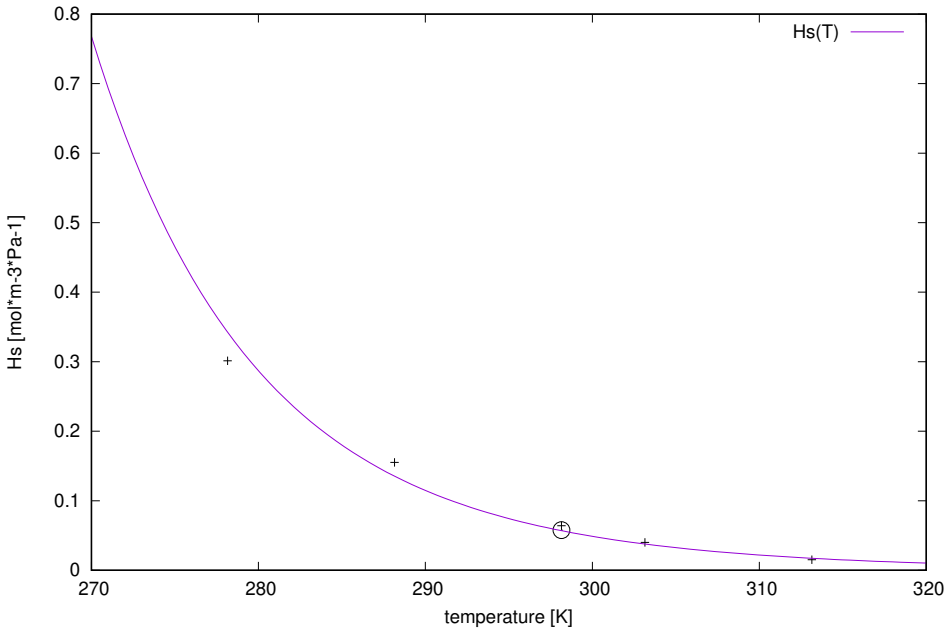



ref = 3683; chem = PBDE-6; casrn = 147217-72-9; r2 = 0.98734

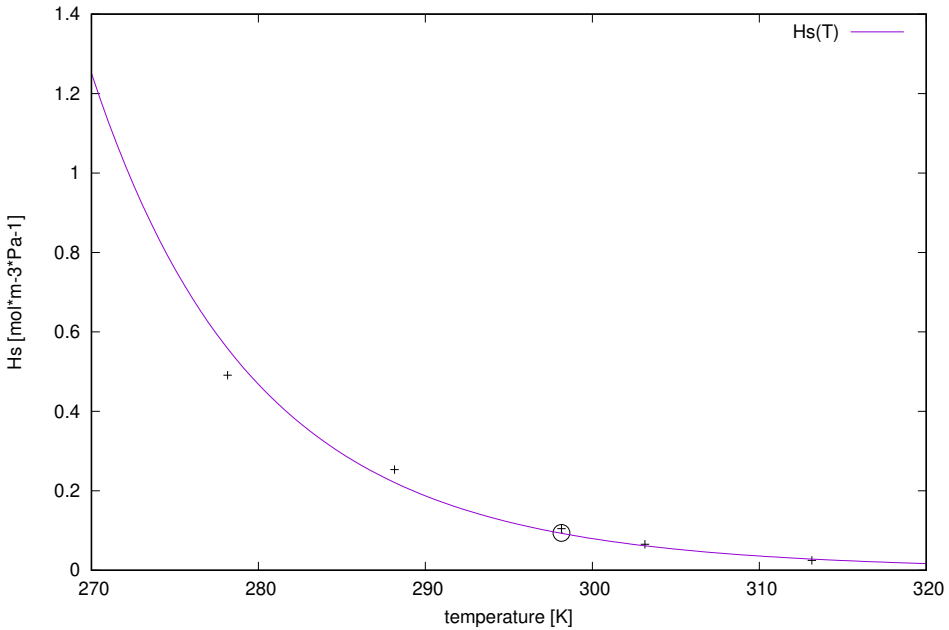

ref = 3683; chem = PBDE-19; casrn = 147217-73-0; r2 = 0.98738

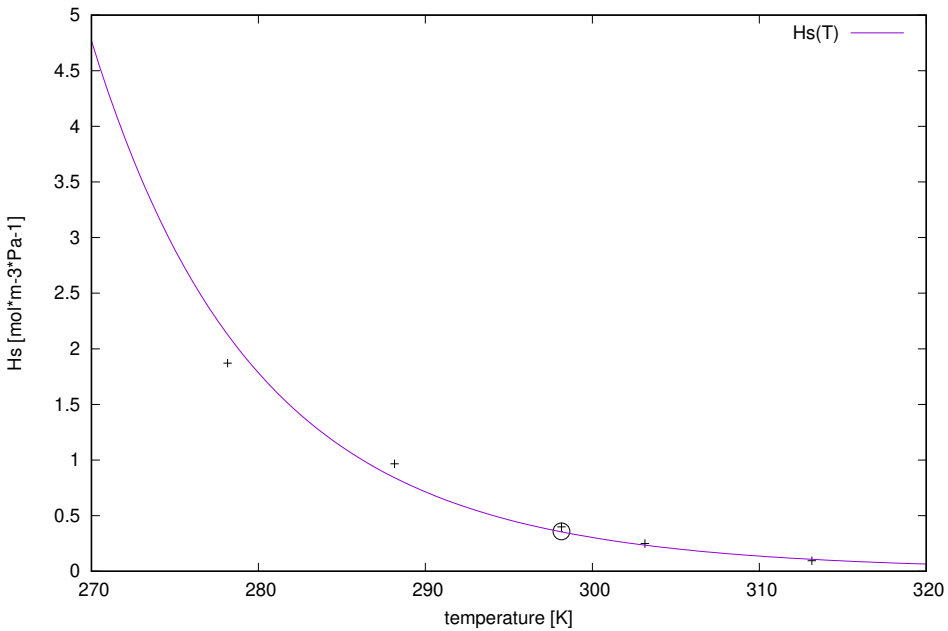

ref = 3683; chem = PBDE-16; casrn = 147217-74-1; r2 = 0.98757

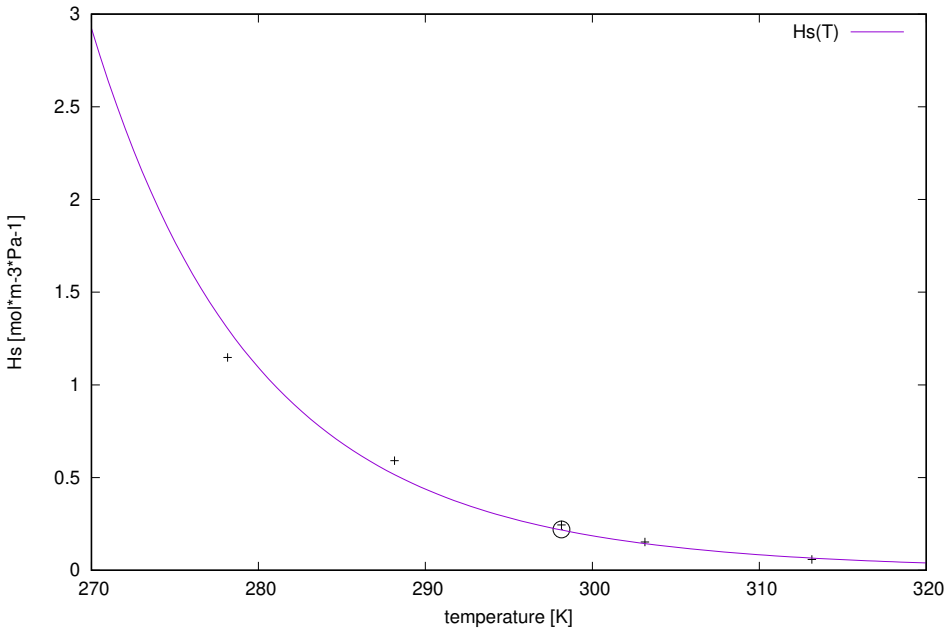

ref = 3683; chem = PBDE-17; casrn = 147217-75-2; r2 = 0.98734

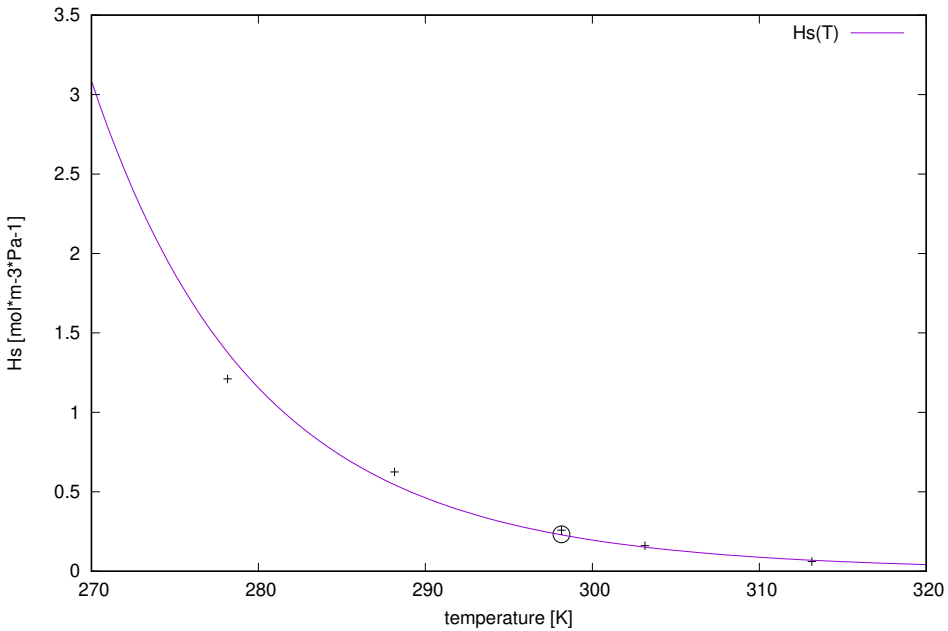

ref = 3683; chem = PBDE-20; casrn = 147217-76-3; r2 = 0.98734

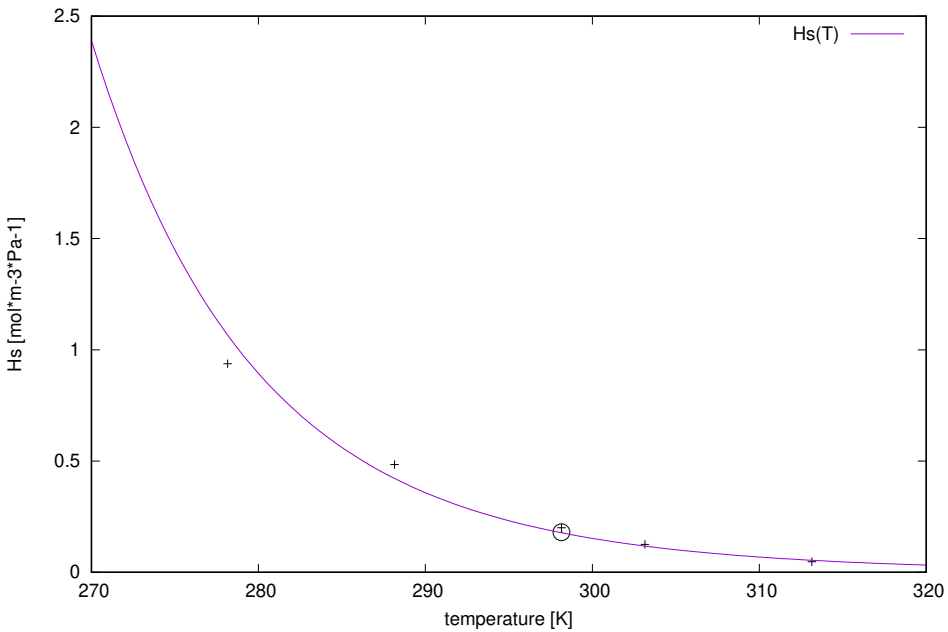

ref = 3683; chem = PBDE-25; casrn = 147217-77-4; r2 = 0.98734

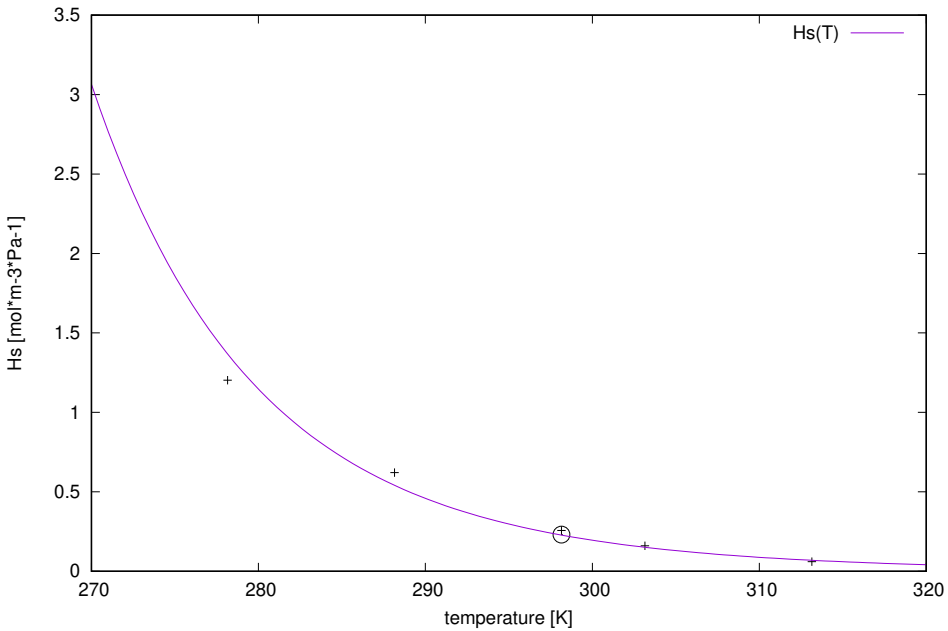

ref = 3683; chem = PBDE-36; casrn = 147217-79-6; r2 = 0.98734

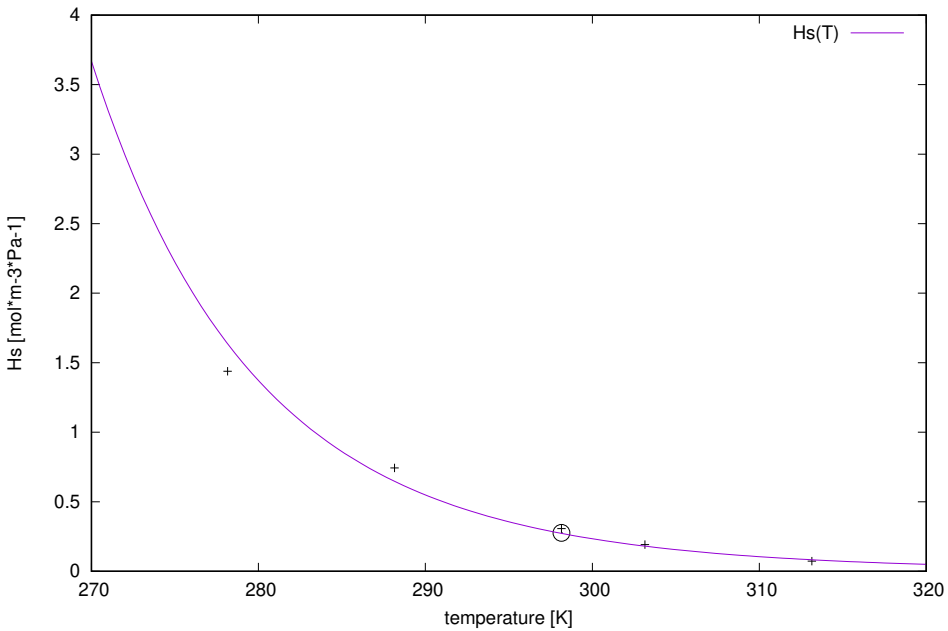

ref = 3683; chem = PBDE-35; casrn = 147217-80-9; r2 = 0.98734

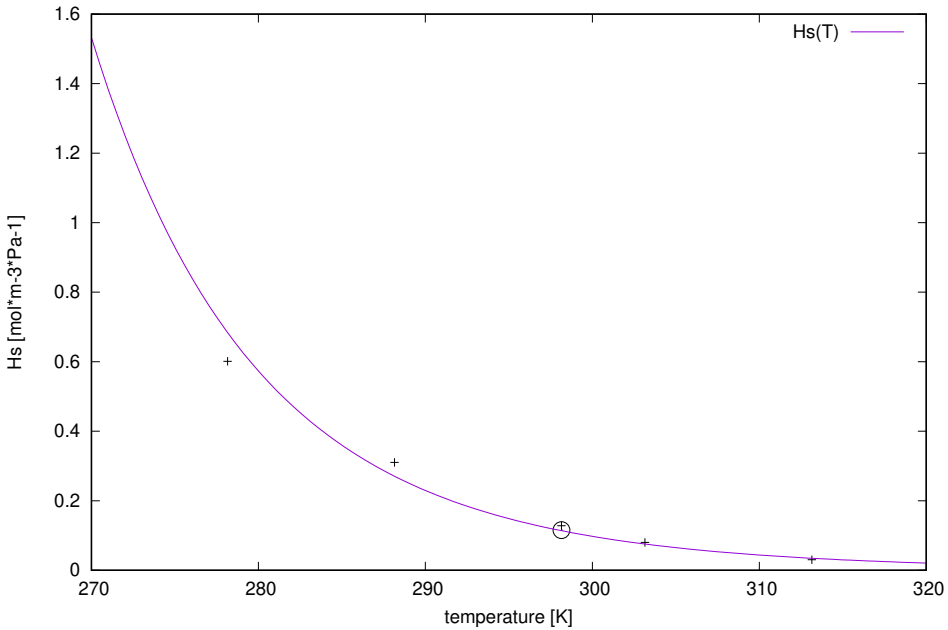



ref = 3683; chem = PBDE-37; casrn = 147217-81-0; r2 = 0.98734

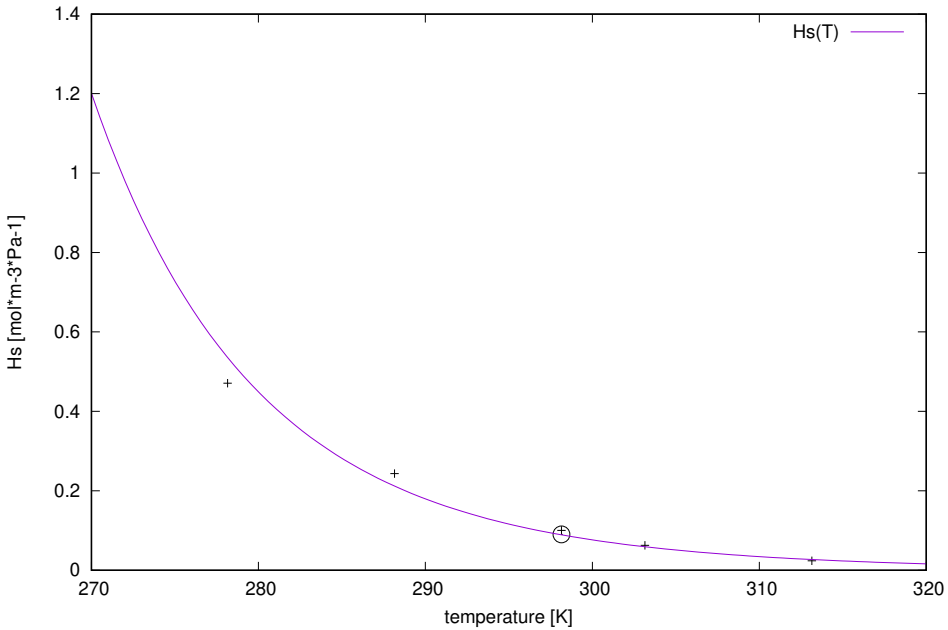

ref = 3683; chem = PBDE-30; casrn = 155999-95-4; r2 = 0.98734

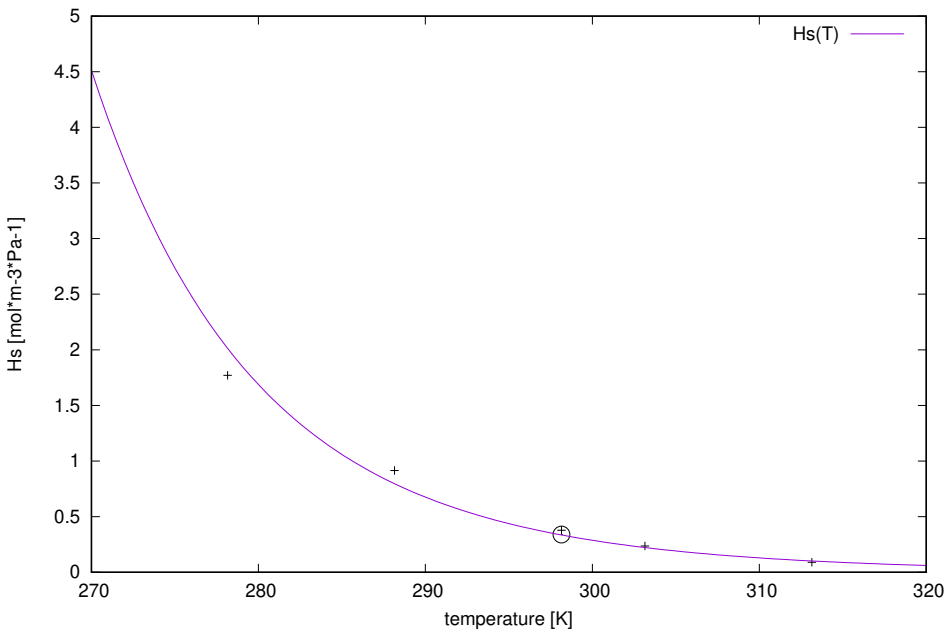

ref = 3683; chem = PBDE-7; casrn = 171977-44-9; r2 = 0.98757

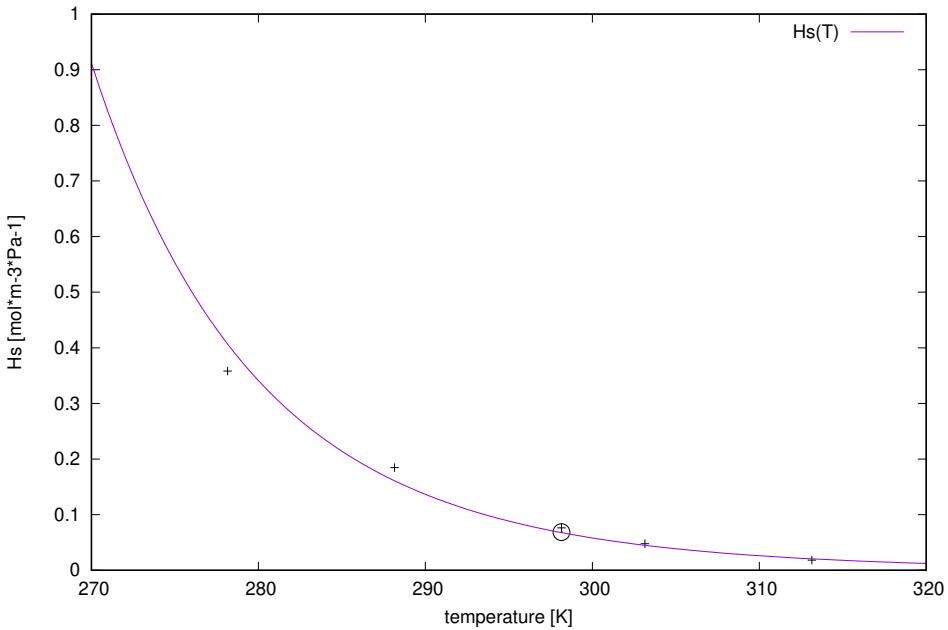

ref = 3683; chem = PBDE-85; casrn = 182346-21-0; r2 = 0.98734

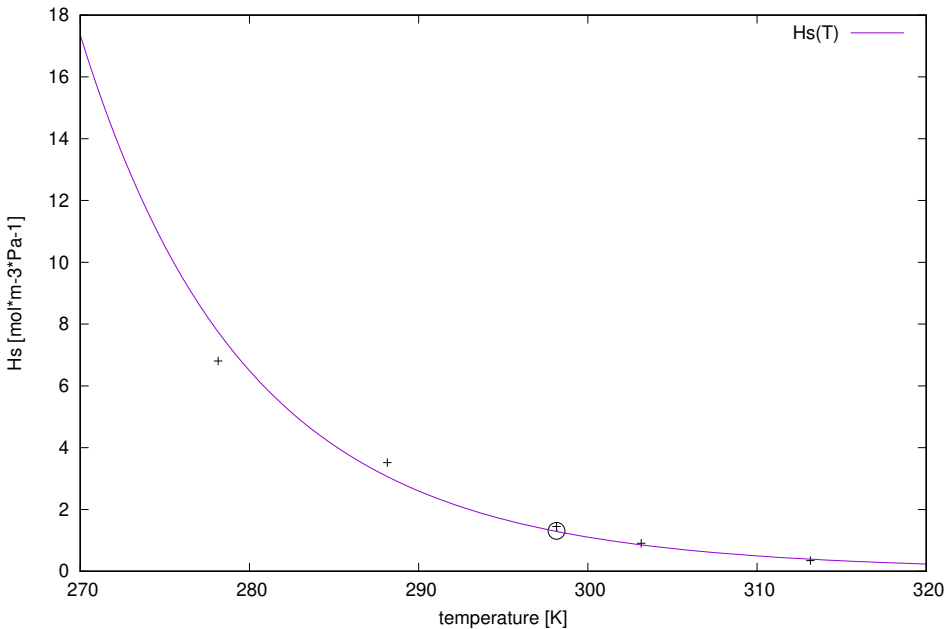

ref = 3683; chem = PBDE-128; casrn = 182677-28-7; r2 = 0.98757

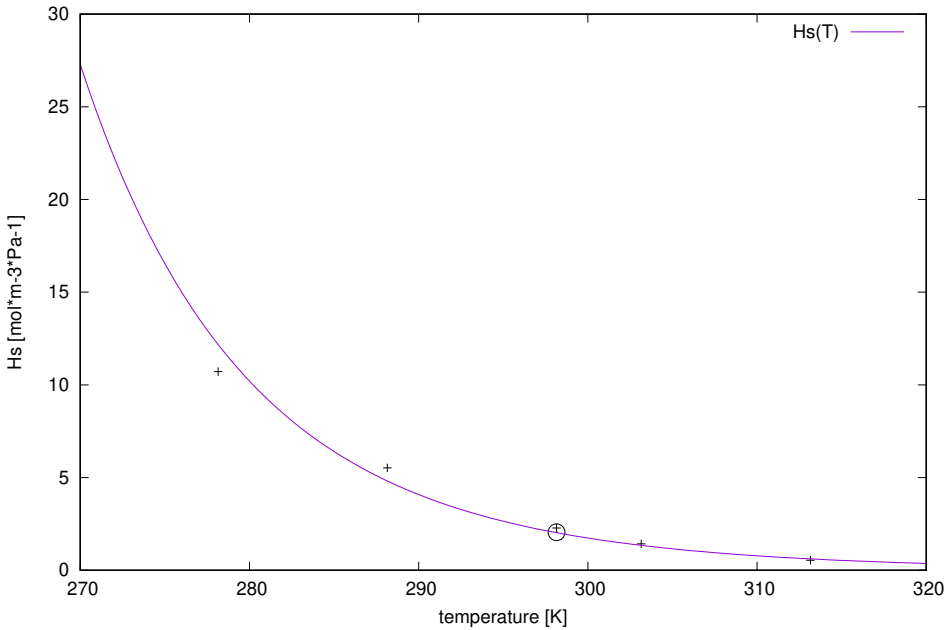

ref = 3683; chem = PBDE-138; casrn = 182677-30-1; r2 = 0.98734

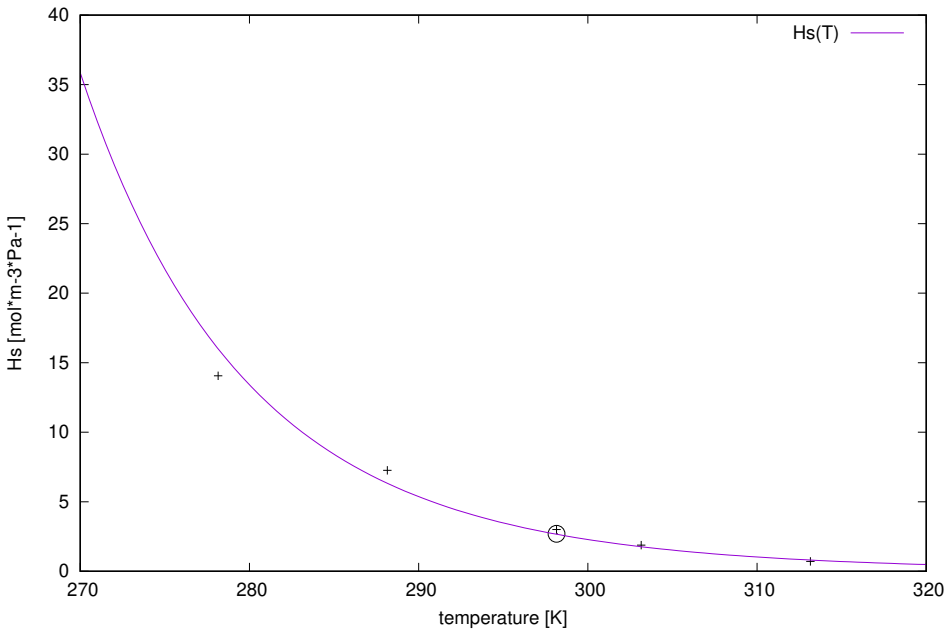

ref = 3683; chem = PBDE-51; casrn = 189084-57-9; r2 = 0.98748

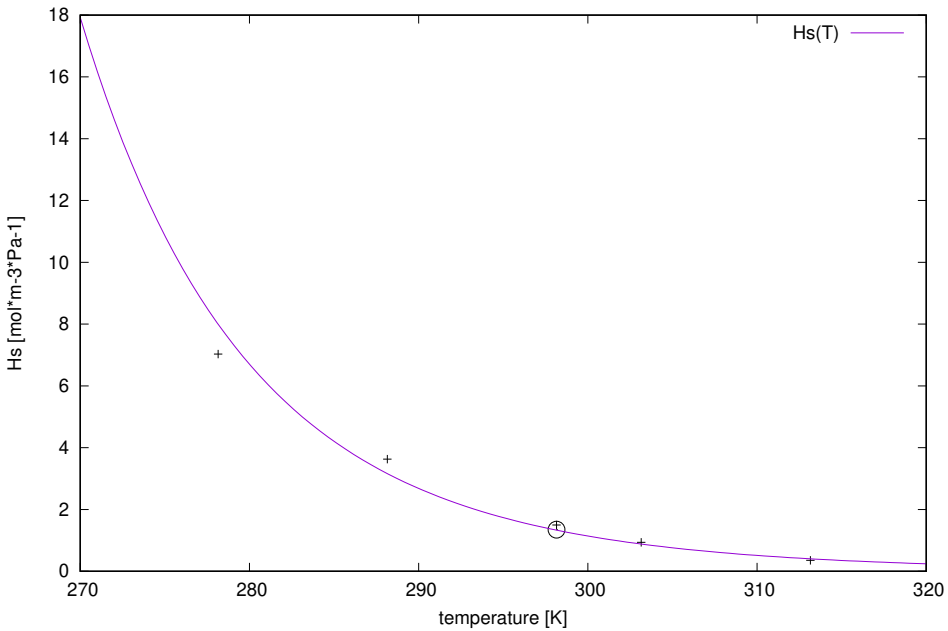

ref = 3683; chem = PBDE-166; casrn = 189084-58-0; r2 = 0.98734

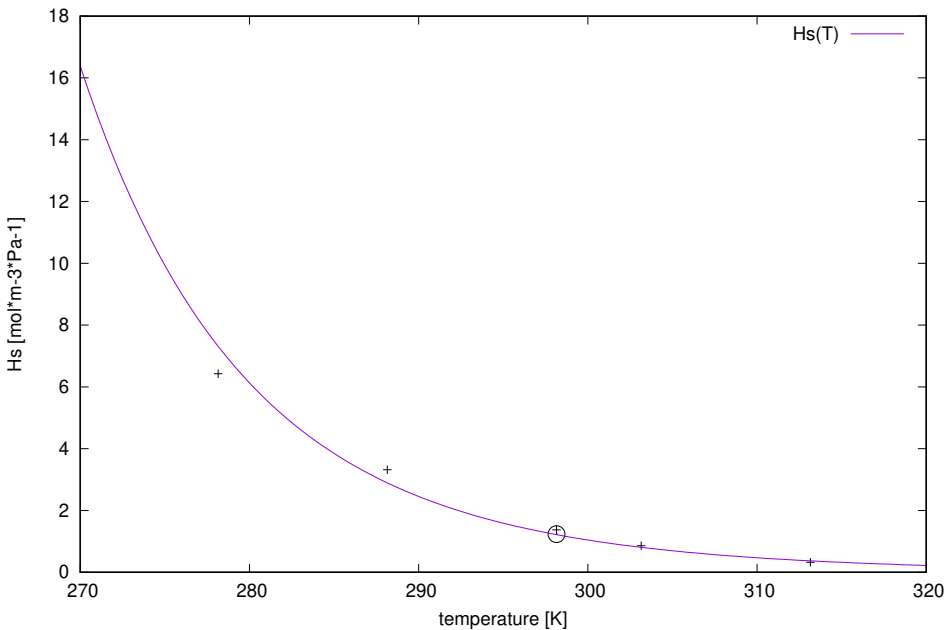



ref = 3683; chem = PBDE-12; casrn = 189084-59-1; r2 = 0.98734

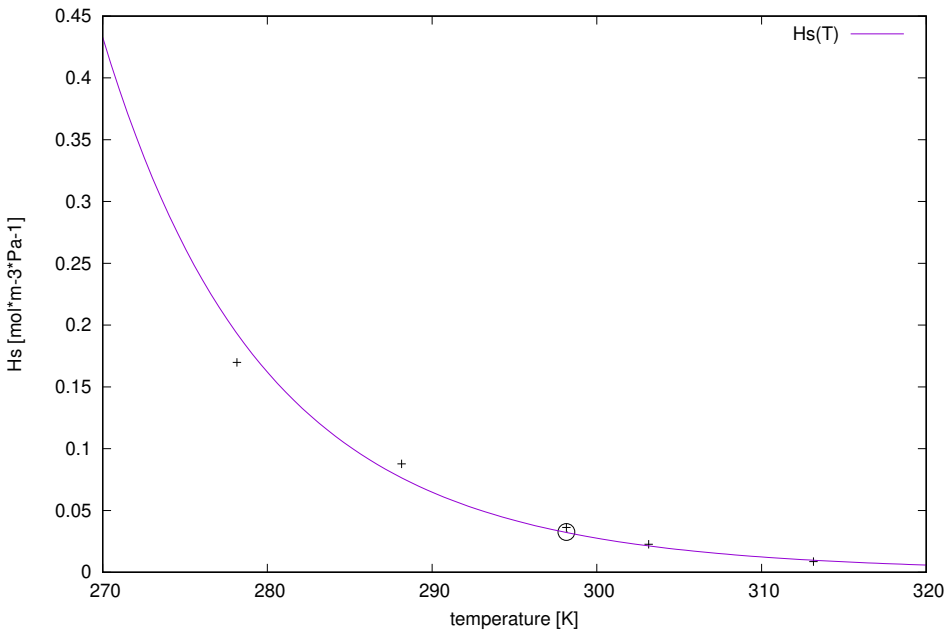

ref = 3683; chem = PBDE-32; casrn = 189084-60-4; r2 = 0.98757

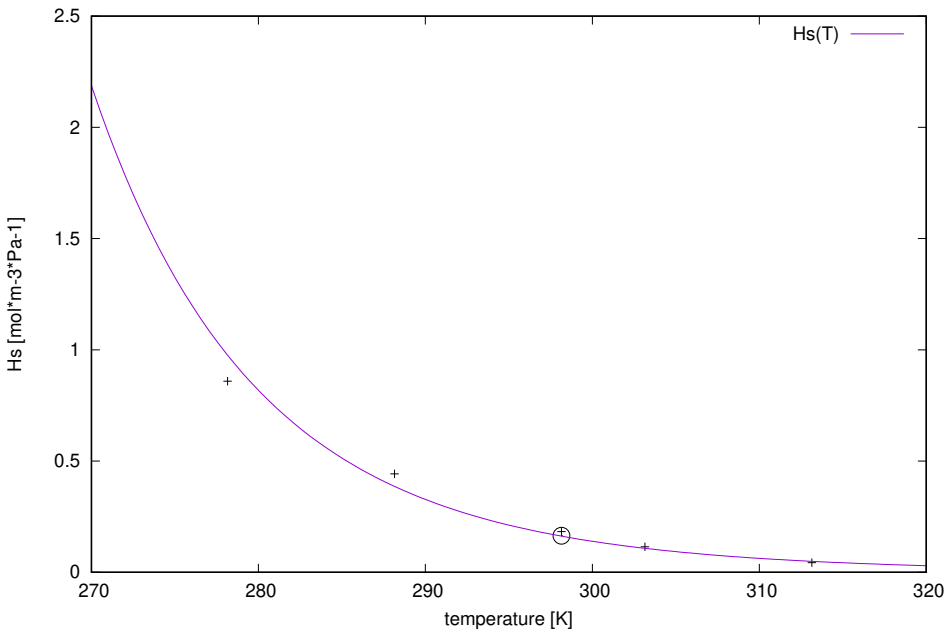

ref = 3683; chem = PBDE-66; casrn = 189084-61-5; r2 = 0.98734

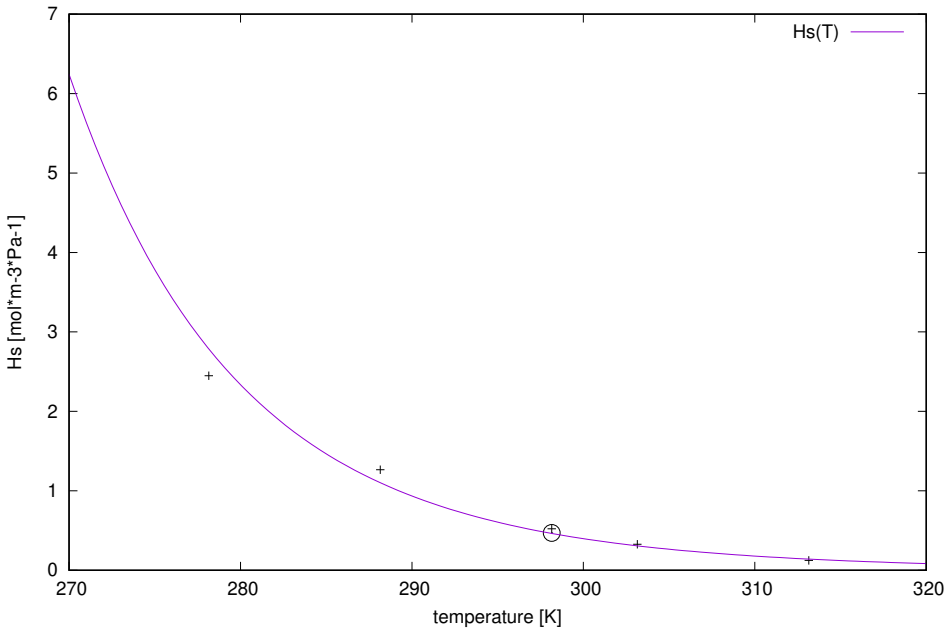

ref = 3683; chem = PBDE-71; casrn = 189084-62-6; r2 = 0.98734

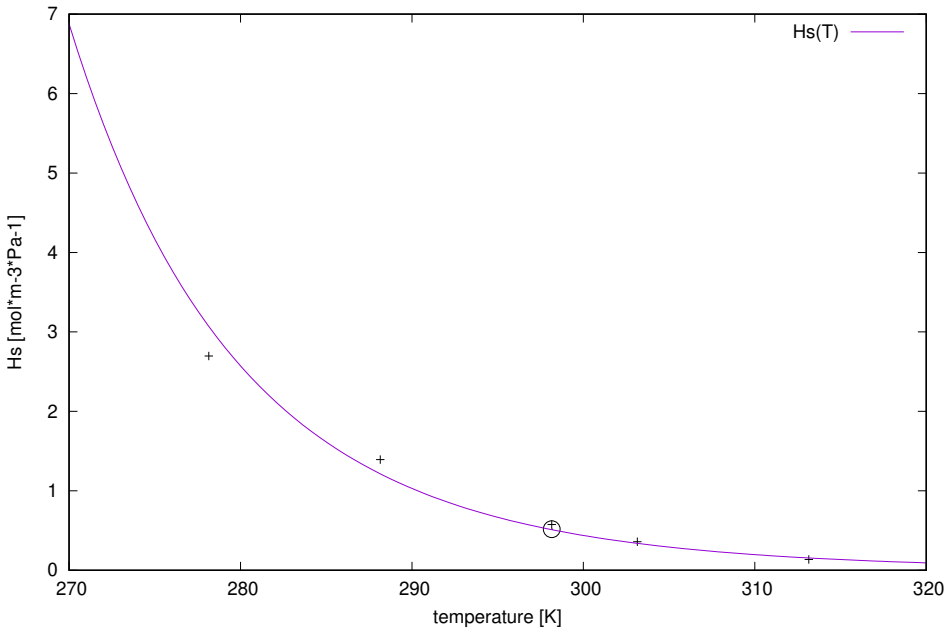

ref = 3683; chem = PBDE-75; casrn = 189084-63-7; r2 = 0.98734

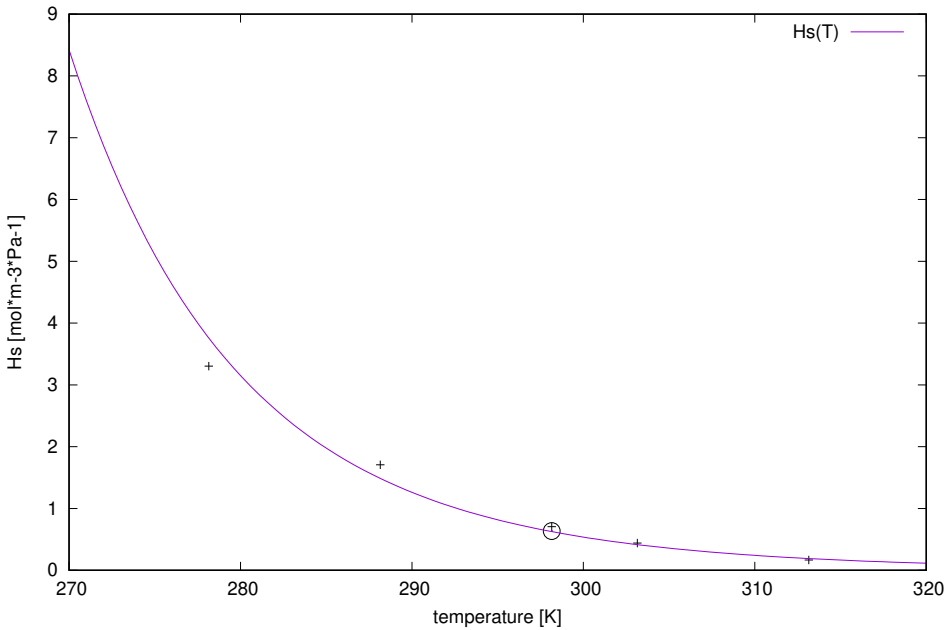

ref = 3683; chem = PBDE-100; casrn = 189084-64-8; r2 = 0.96073

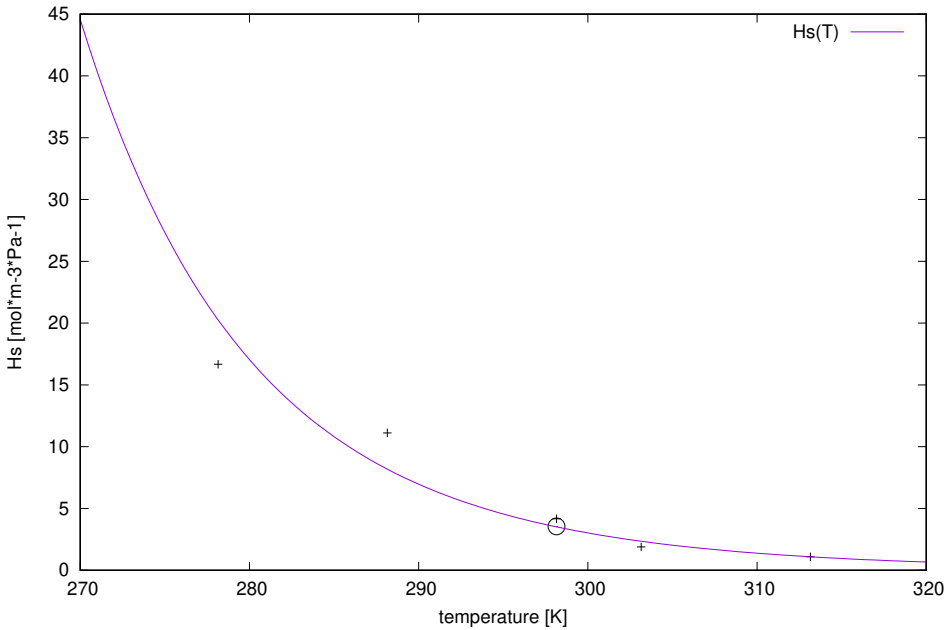

ref = 3683; chem = PBDE-116; casrn = 189084-65-9; r2 = 0.98734

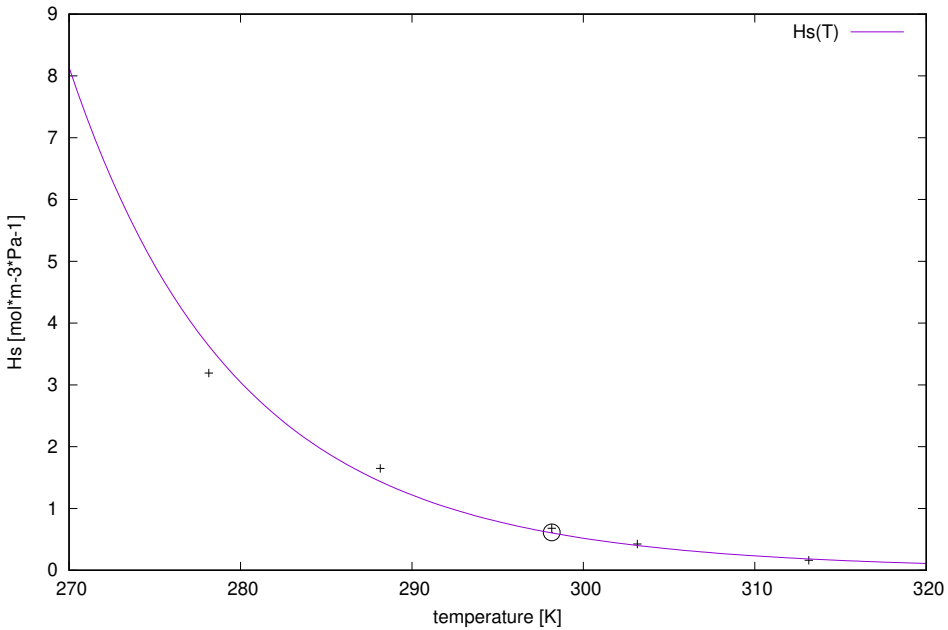

ref = 3683; chem = PBDE-119; casrn = 189084-66-0; r2 = 0.98734

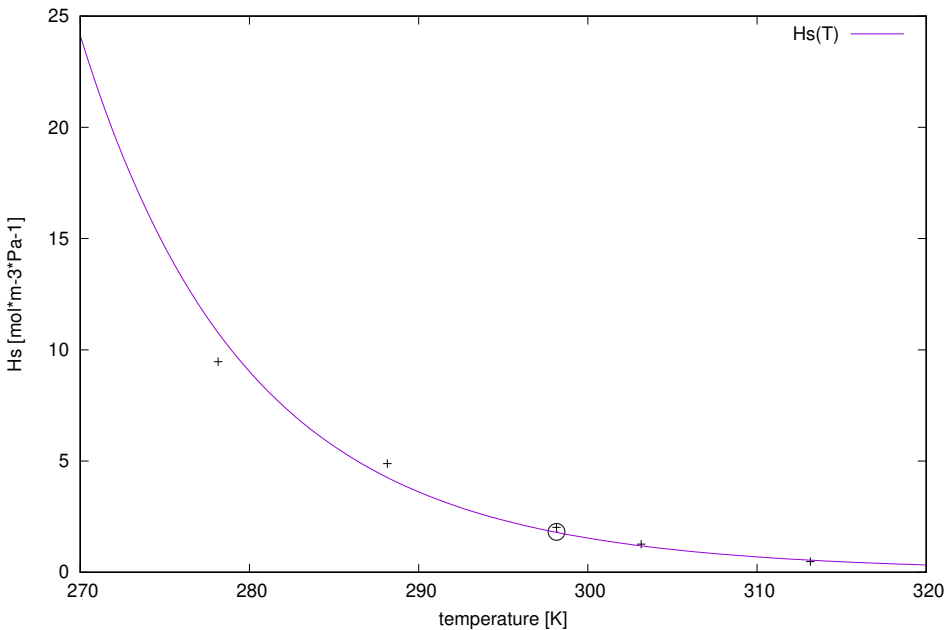



ref = 3683; chem = PBDE-181; casrn = 189084-67-1; r2 = 0.98734

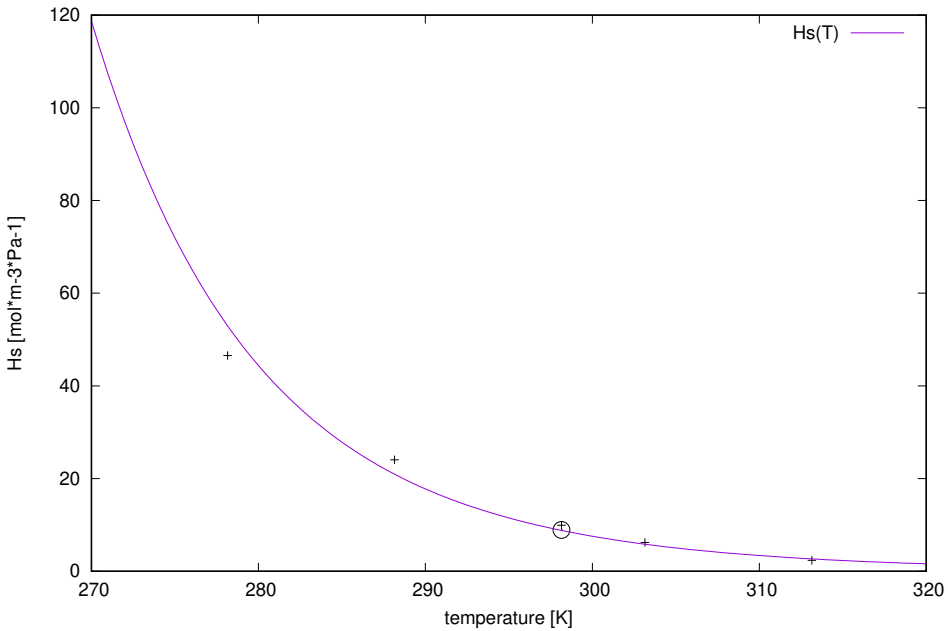

ref = 3683; chem = PBDE-190; casrn = 189084-68-2; r2 = 0.98738

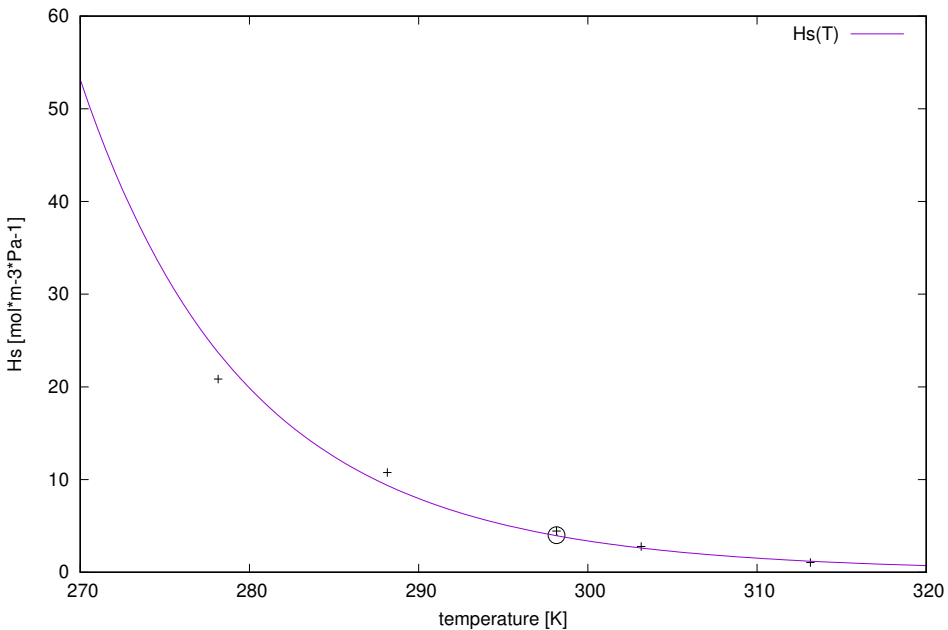

ref = 3683; chem = PBDE-15; casrn = 2050-47-7; r2 = 0.98734

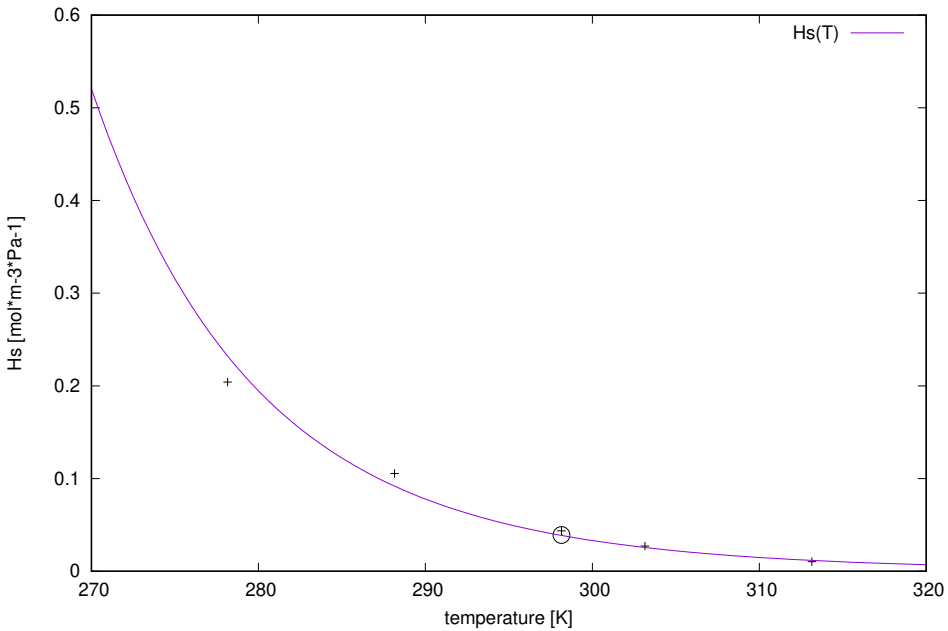

ref = 3683; chem = PBDE-154; casrn = 207122-15-4; r2 = 0.90589

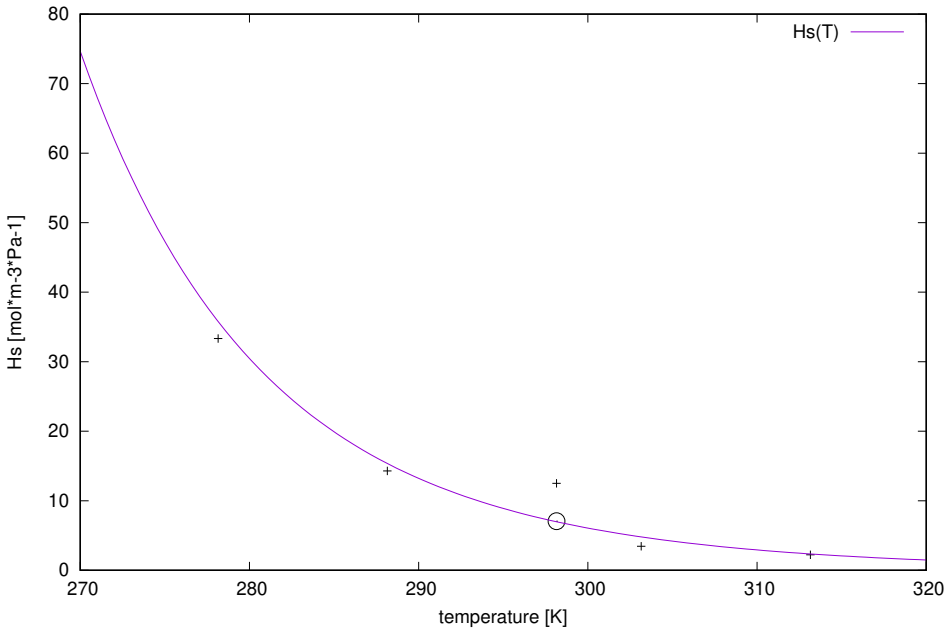

ref = 3683; chem = PBDE-183; casrn = 207122-16-5; r2 = 0.98734

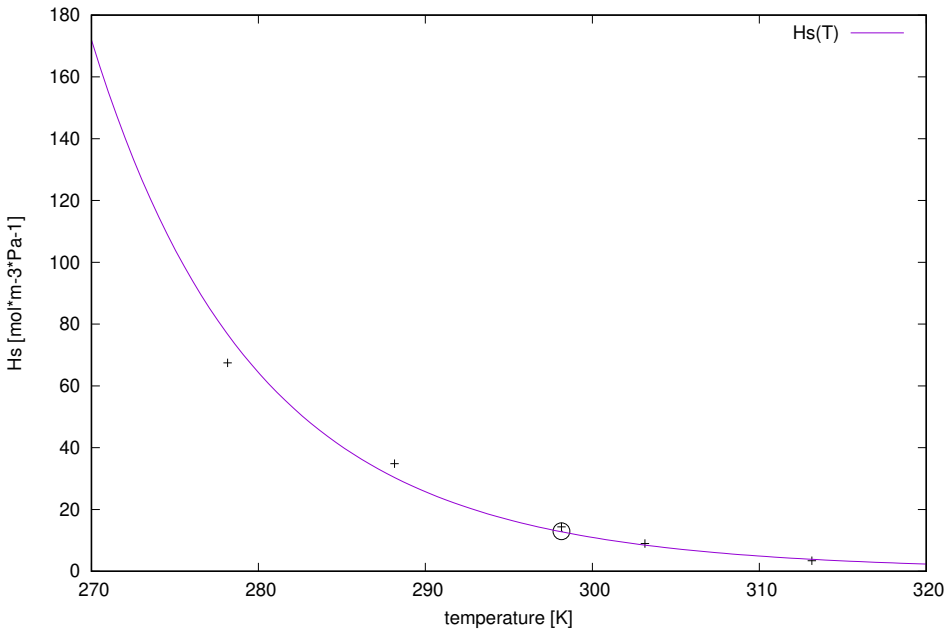

ref = 3683; chem = PBDE-24; casrn = 218304-36-0; r2 = 0.98757

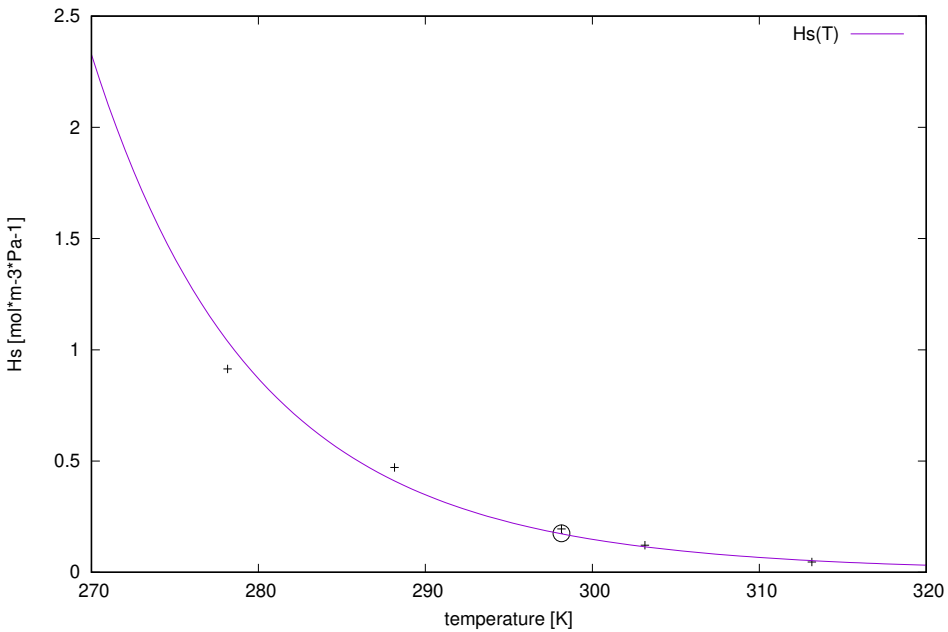

ref = 3683; chem = PBDE-49; casrn = 243982-82-3; r2 = 0.98734

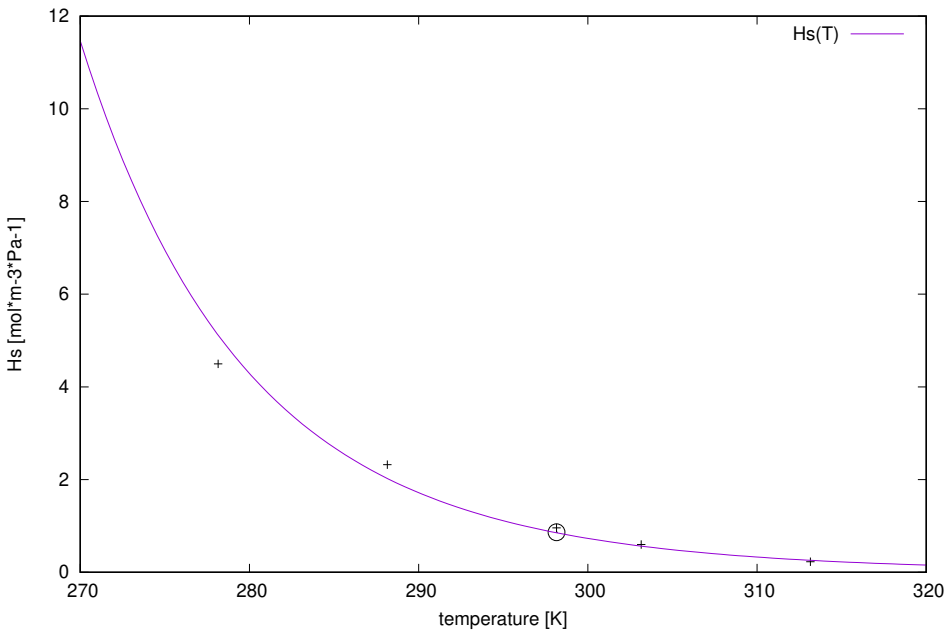

ref = 3683; chem = PBDE-140; casrn = 243982-83-4; r2 = 0.98747

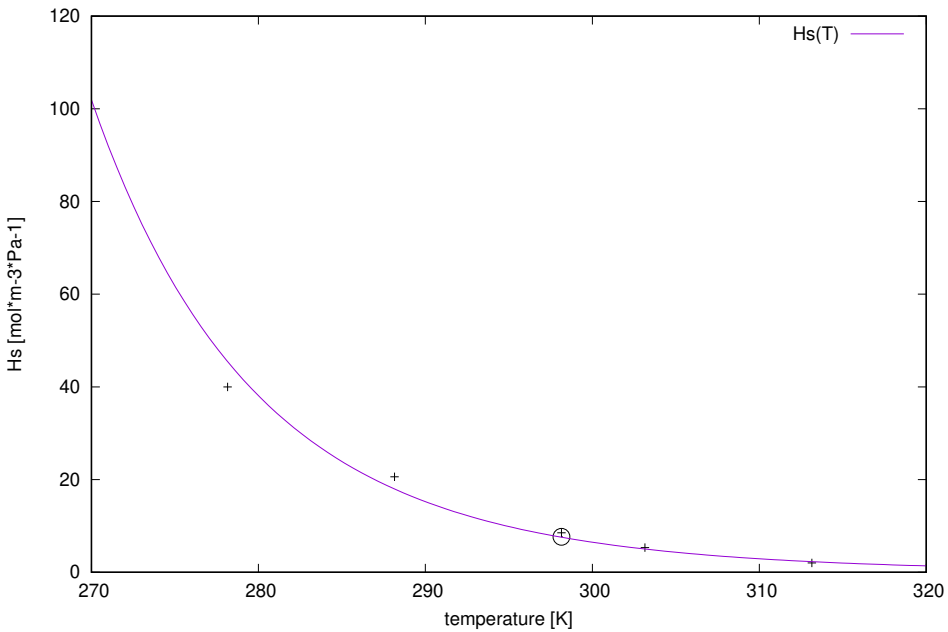



ref = 3683; chem = PBDE-189; casrn = 259087-35-9; r2 = 0.98734

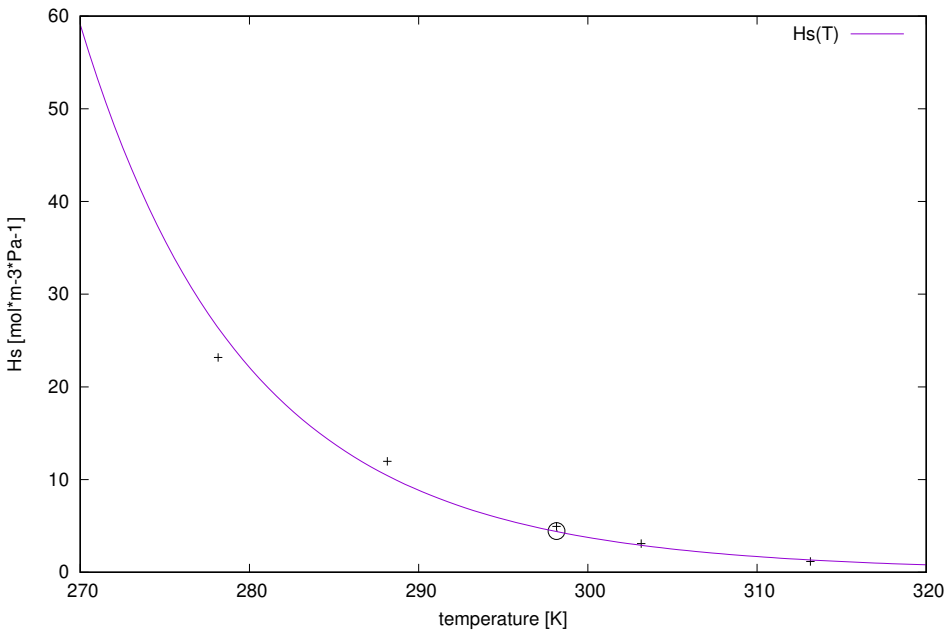

ref = 3683; chem = PBDE-194; casrn = 32536-52-0; r2 = 0.98734

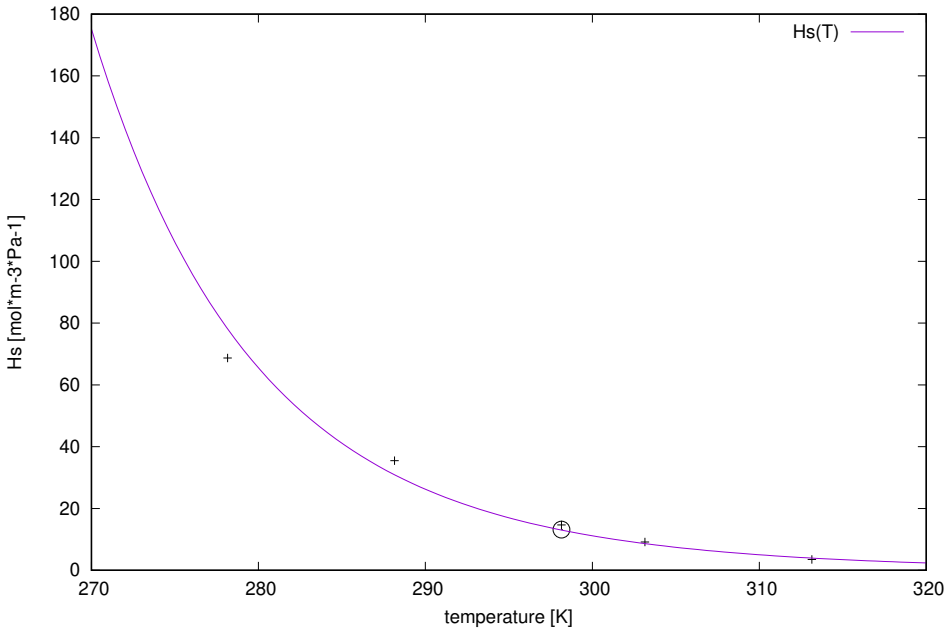

ref = 3683; chem = PBDE-69; casrn = 327185-09-1; r2 = 0.98747

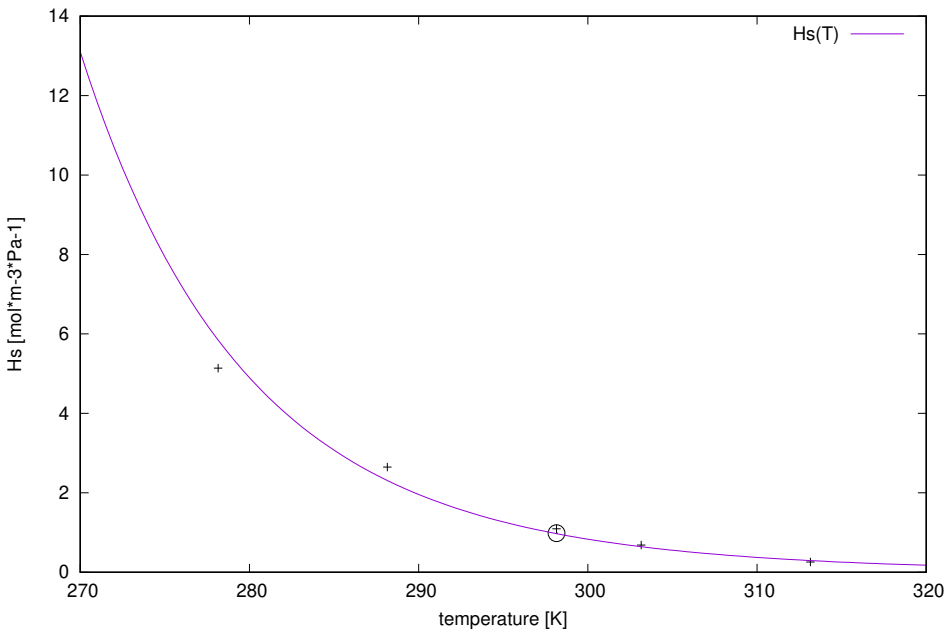

ref = 3683; chem = PBDE-82; casrn = 327185-11-5; r2 = 0.98734

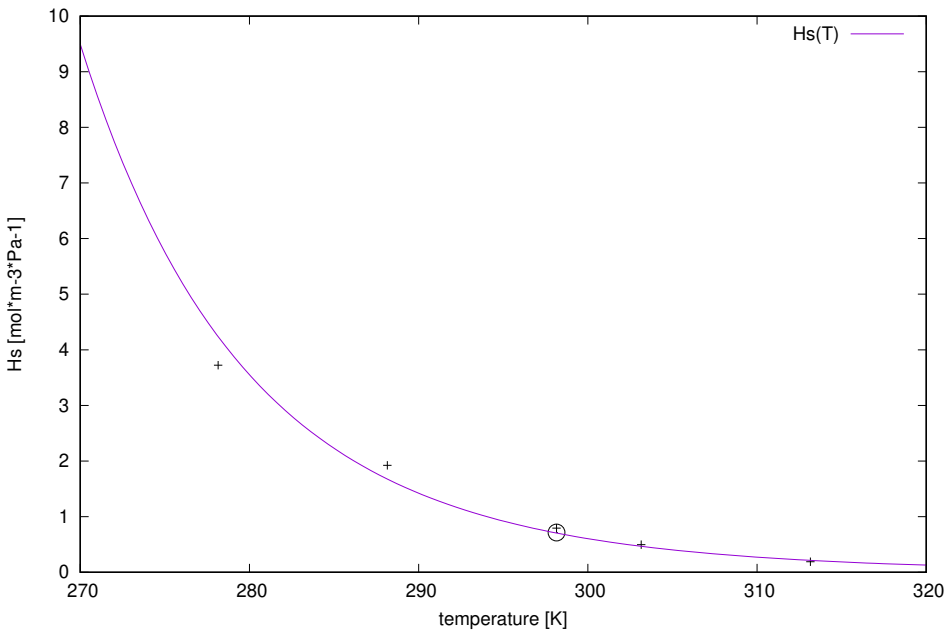

ref = 3683; chem = PBDE-170; casrn = 327185-13-7; r2 = 0.98734

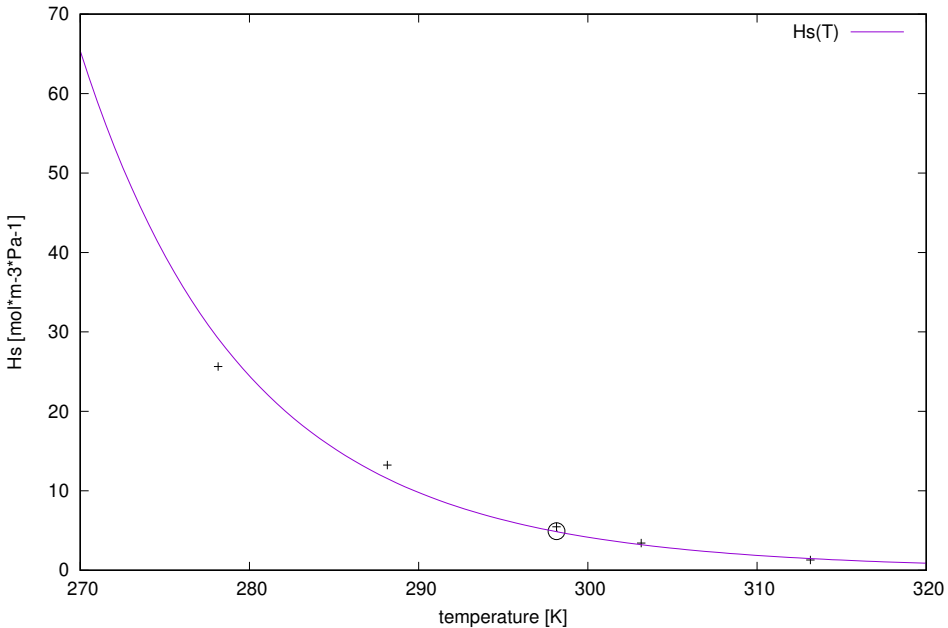

ref = 3683; chem = PBDE-27; casrn = 337513-53-8; r2 = 0.98757

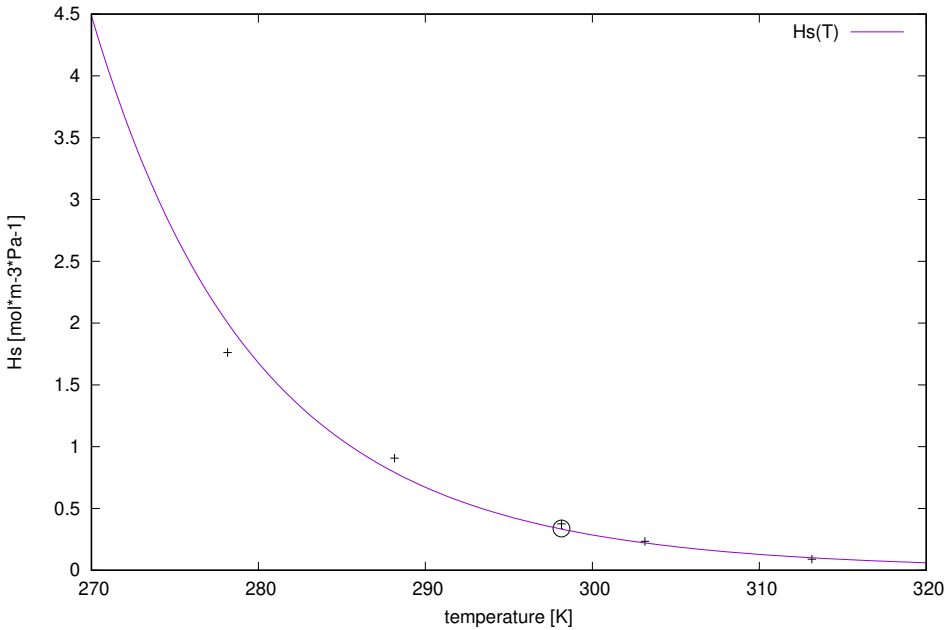

ref = 3683; chem = PBDE-38; casrn = 337513-54-9; r2 = 0.98734

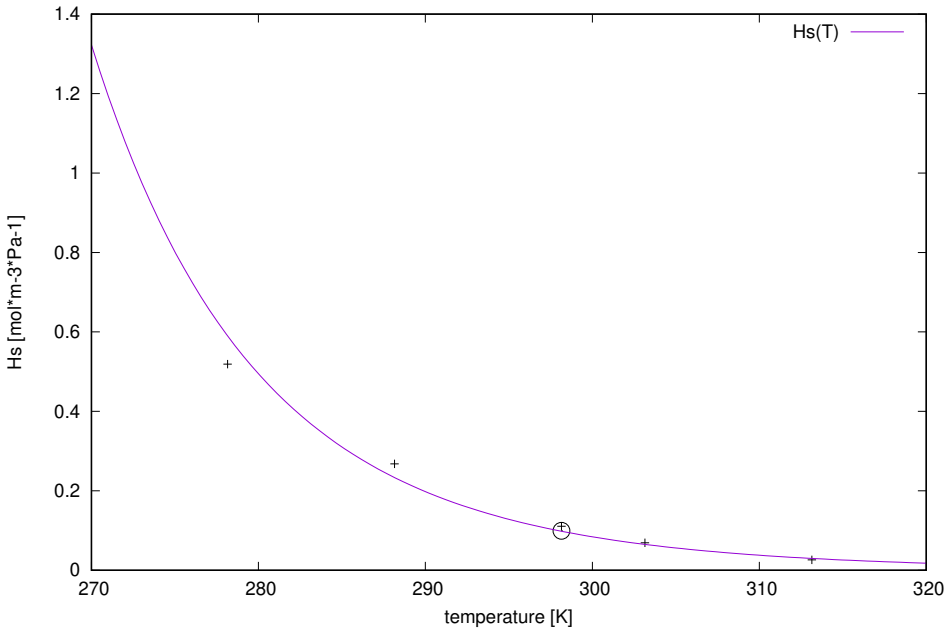

ref = 3683; chem = PBDE-48; casrn = 337513-55-0; r2 = 0.98734

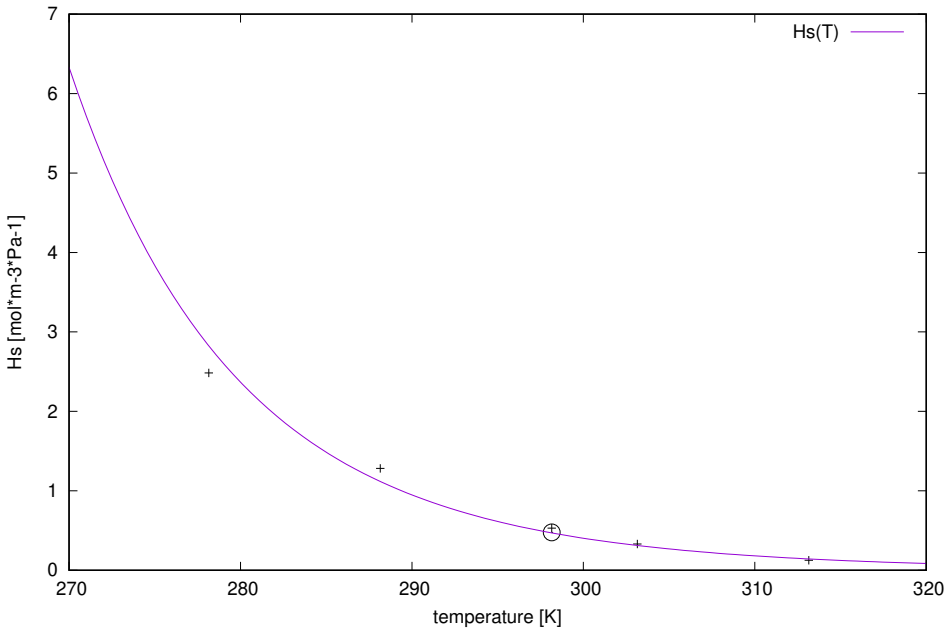



ref = 3683; chem = PBDE-29; casrn = 337513-56-1; r2 = 0.98734

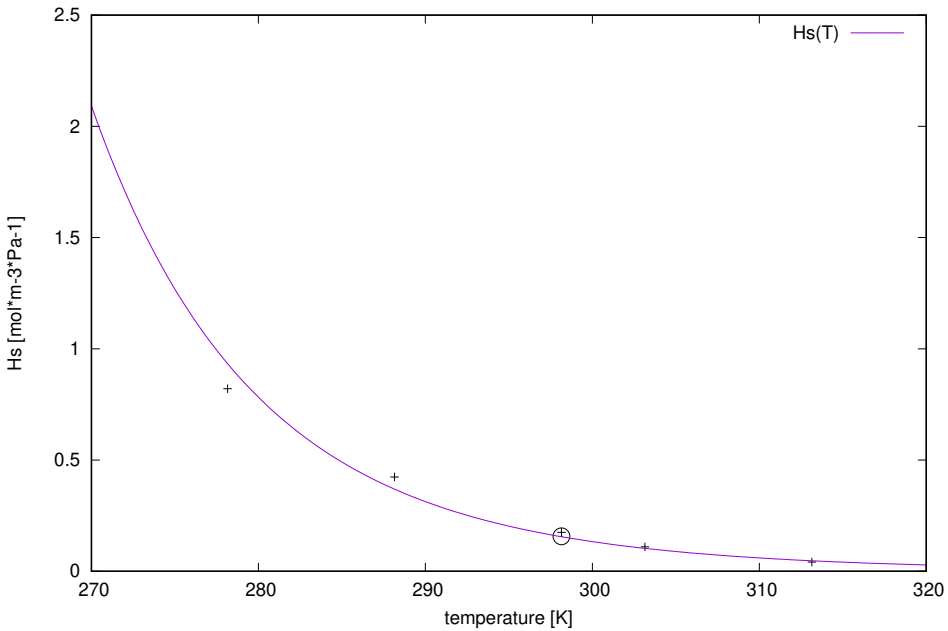

ref = 3683; chem = PBDE-9; casrn = 337513-66-3; r2 = 0.98757

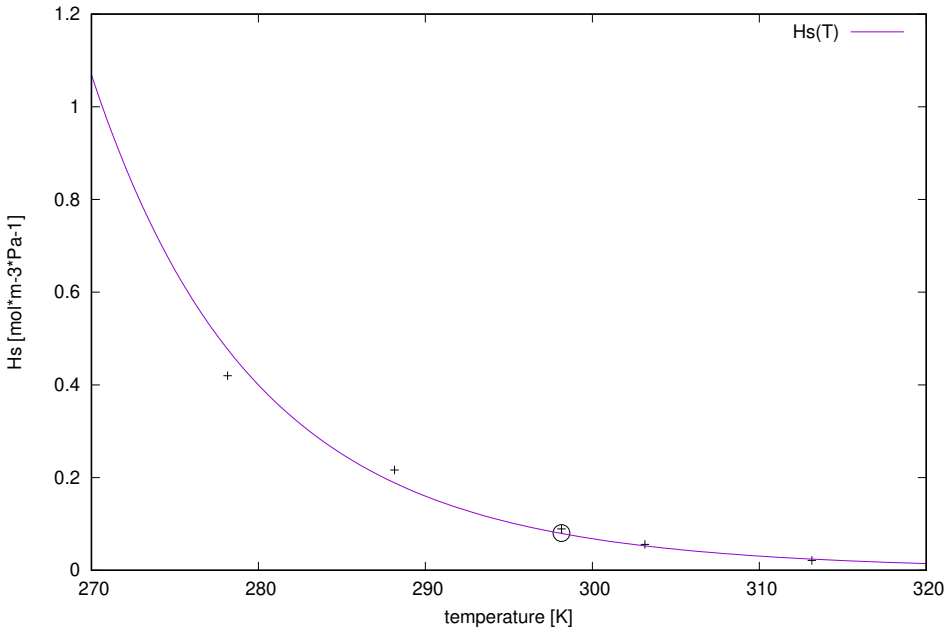

ref = 3683; chem = PBDE-21; casrn = 337513-67-4; r2 = 0.98734

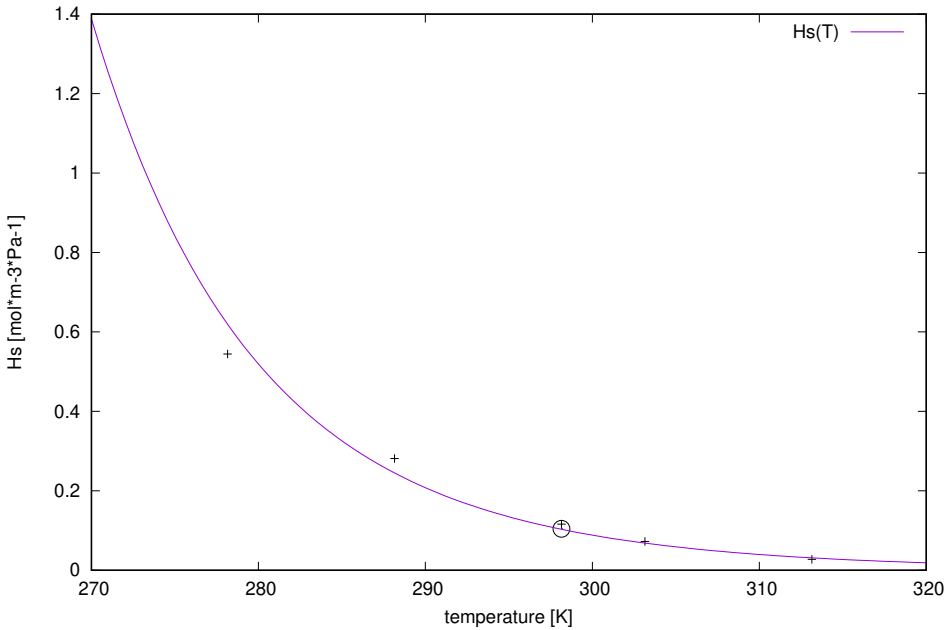

ref = 3683; chem = PBDE-41; casrn = 337513-68-5; r2 = 0.98734

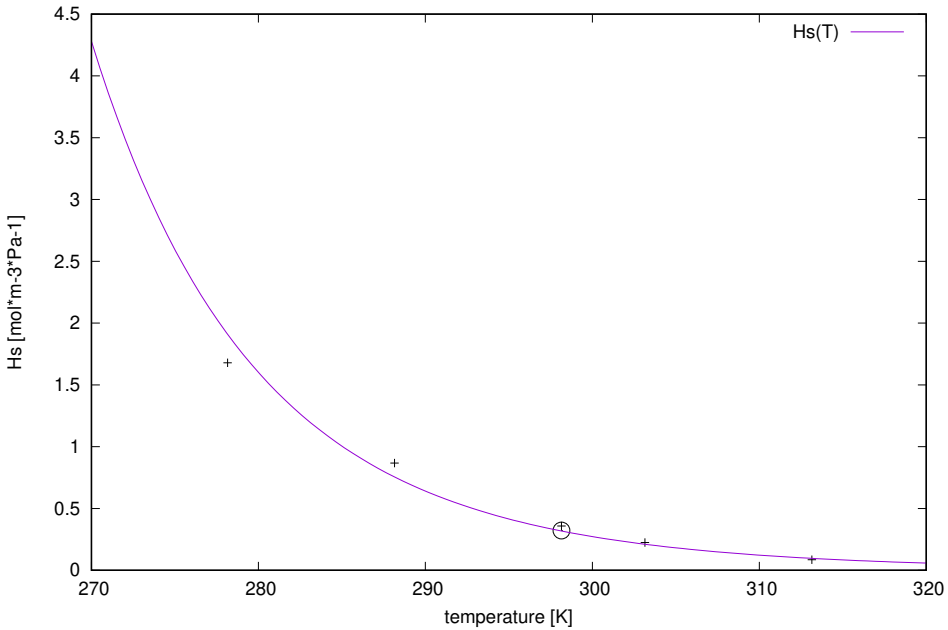

ref = 3683; chem = PBDE-203; casrn = 337513-72-1; r2 = 0.98738

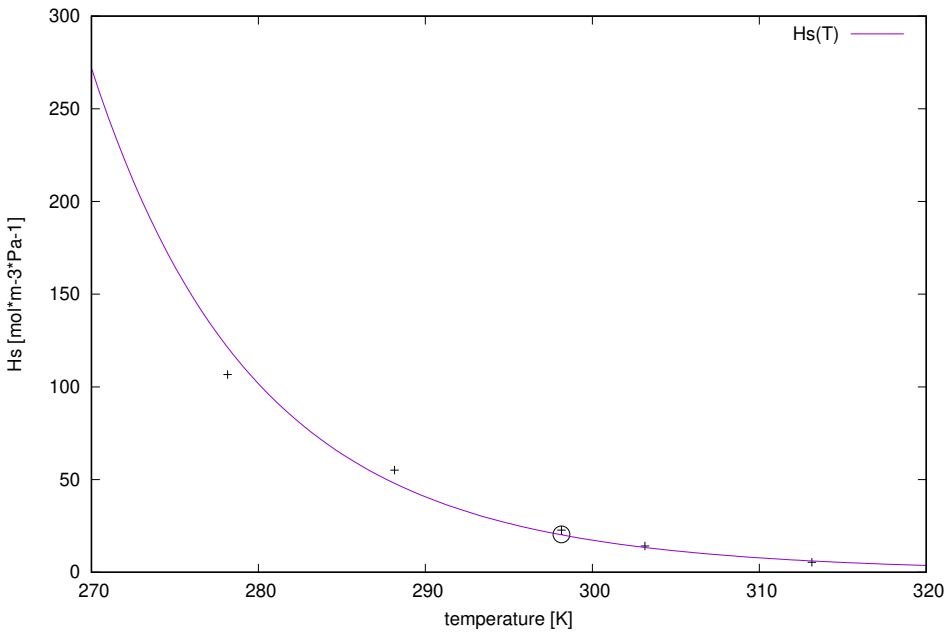

ref = 3683; chem = PBDE-26; casrn = 337513-75-4; r2 = 0.98747

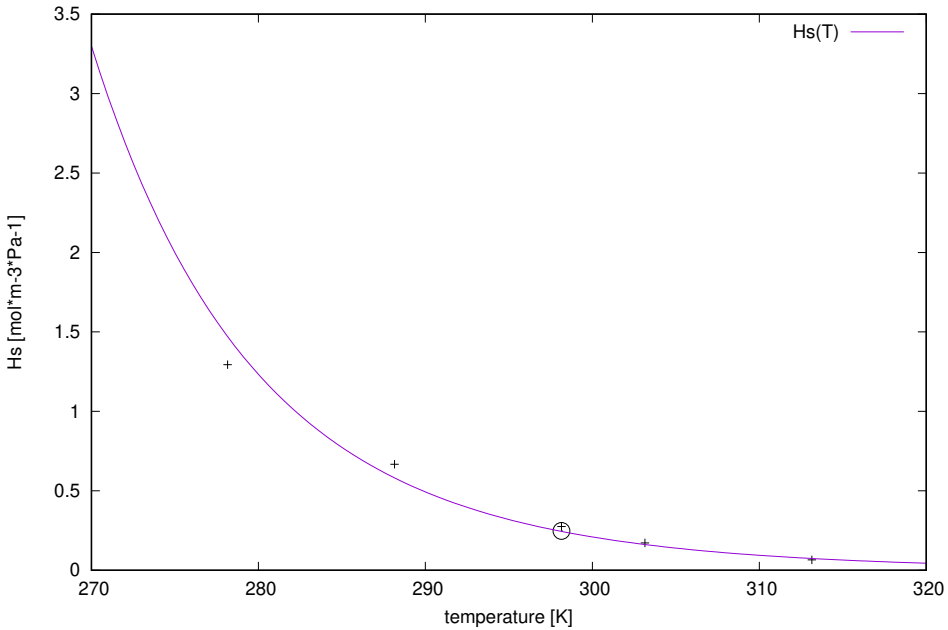

ref = 3683; chem = PBDE-40; casrn = 337513-77-6; r2 = 0.98757

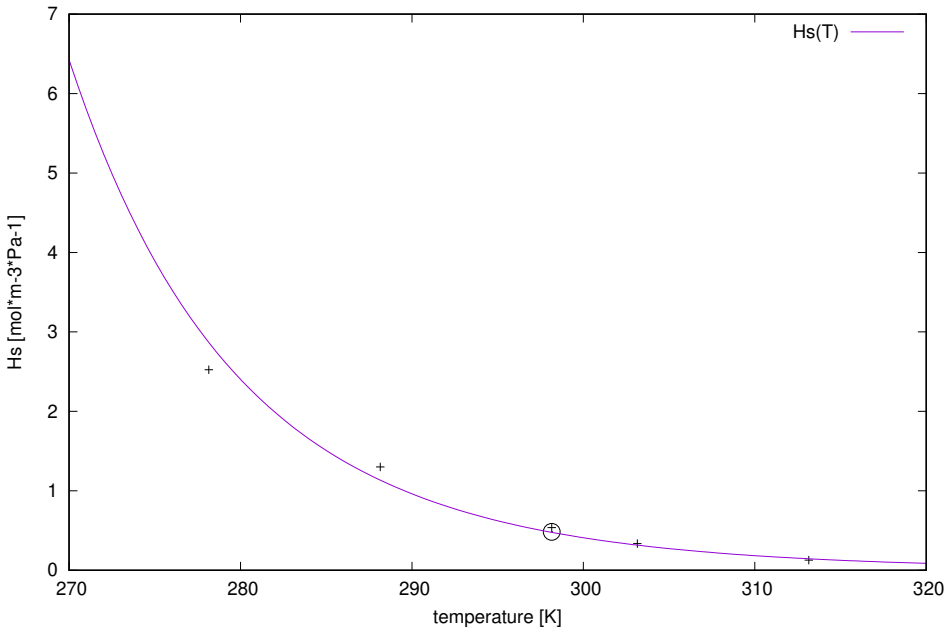

ref = 3683; chem = PBDE-57; casrn = 337513-82-3; r2 = 0.98734

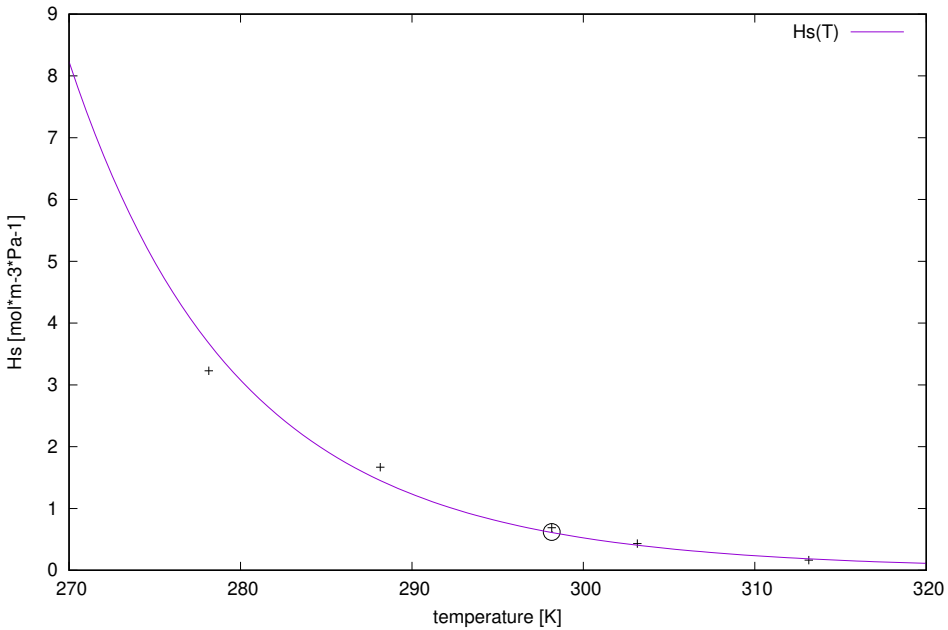



ref = 3683; chem = PBDE-155; casrn = 35854-94-5; r2 = 0.98734

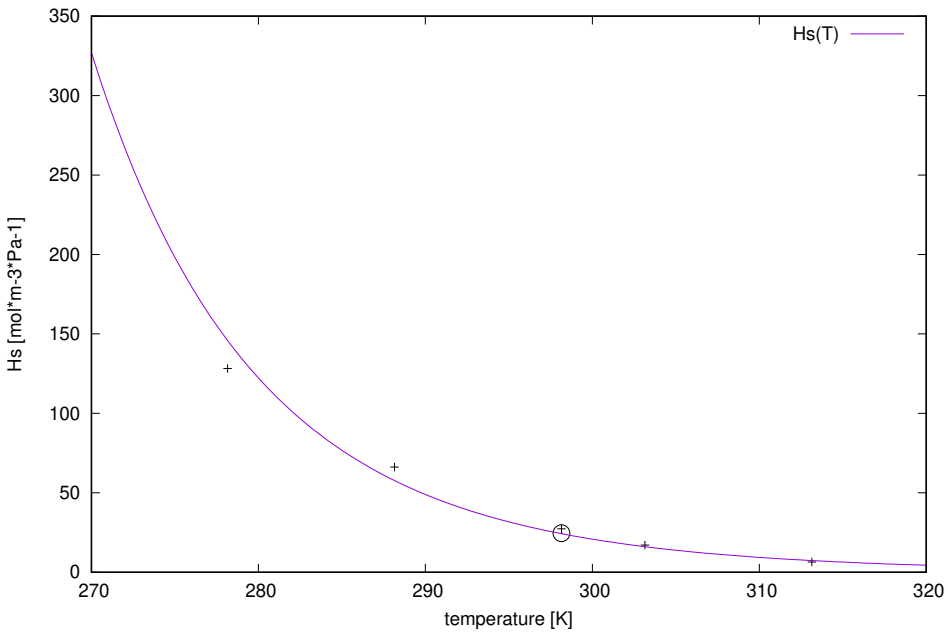

ref = 3683; chem = PBDE-1; casrn = 36563-47-0; r2 = 0.98757

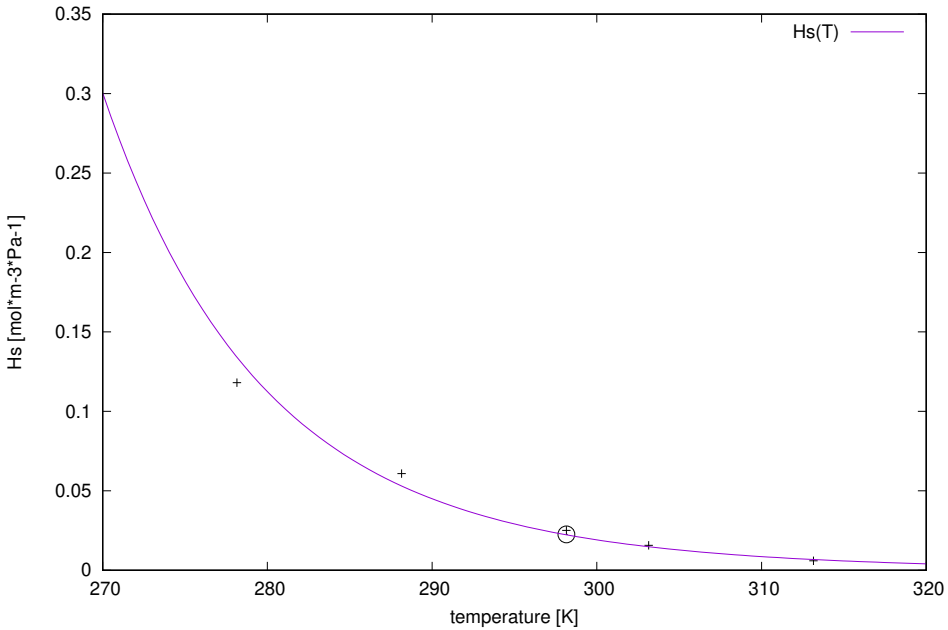

ref = 3683; chem = PBDE-126; casrn = 366791-32-4; r2 = 0.98734

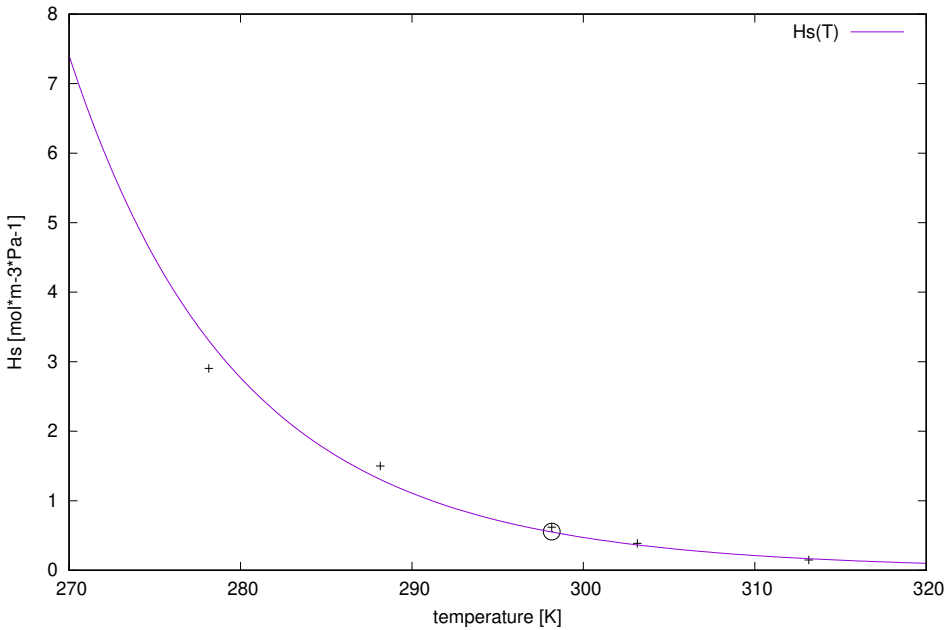

ref = 3683; chem = PBDE-105; casrn = 373594-78-6; r2 = 0.98734

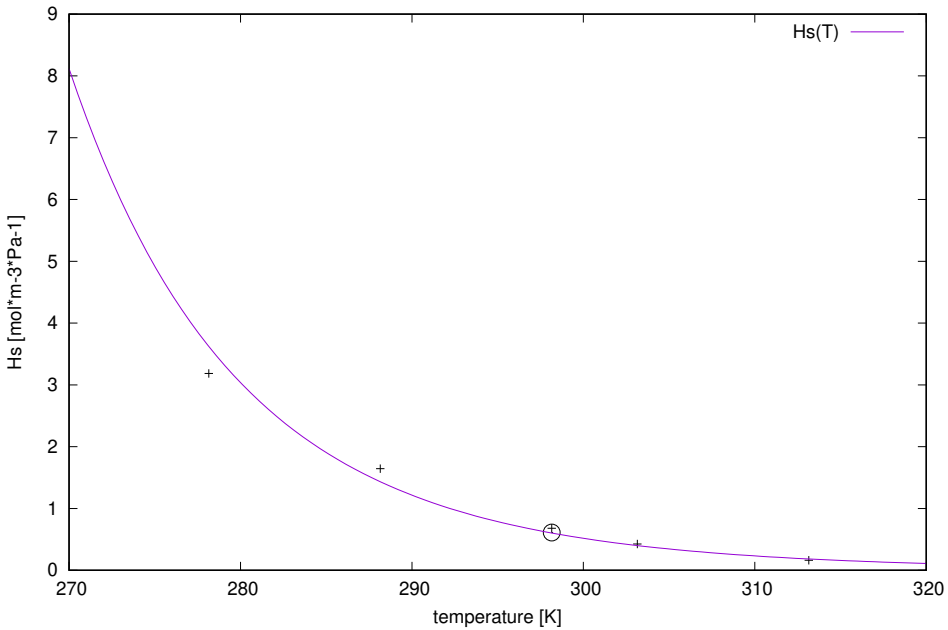

ref = 3683; chem = PBDE-98; casrn = 38463-82-0; r2 = 0.98734

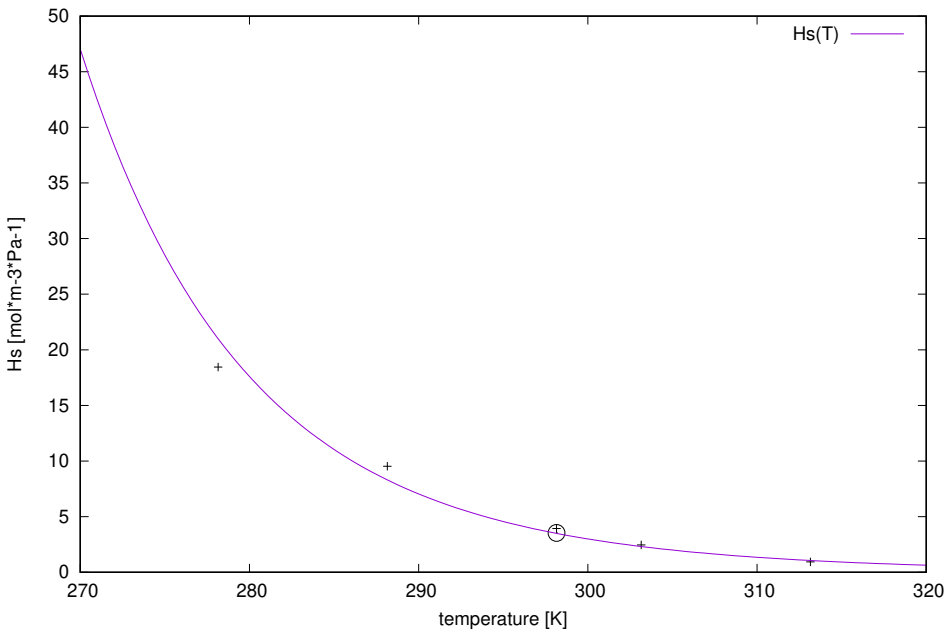

ref = 3683; chem = PBDE-156; casrn = 405237-85-6; r2 = 0.98757

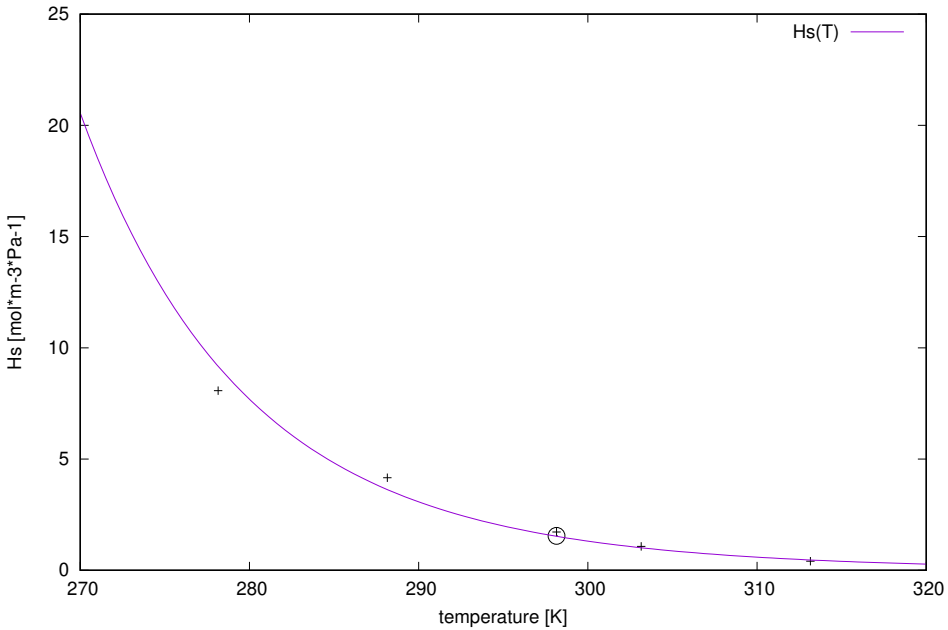

ref = 3683; chem = PBDE-185; casrn = 405237-86-7; r2 = 0.98734

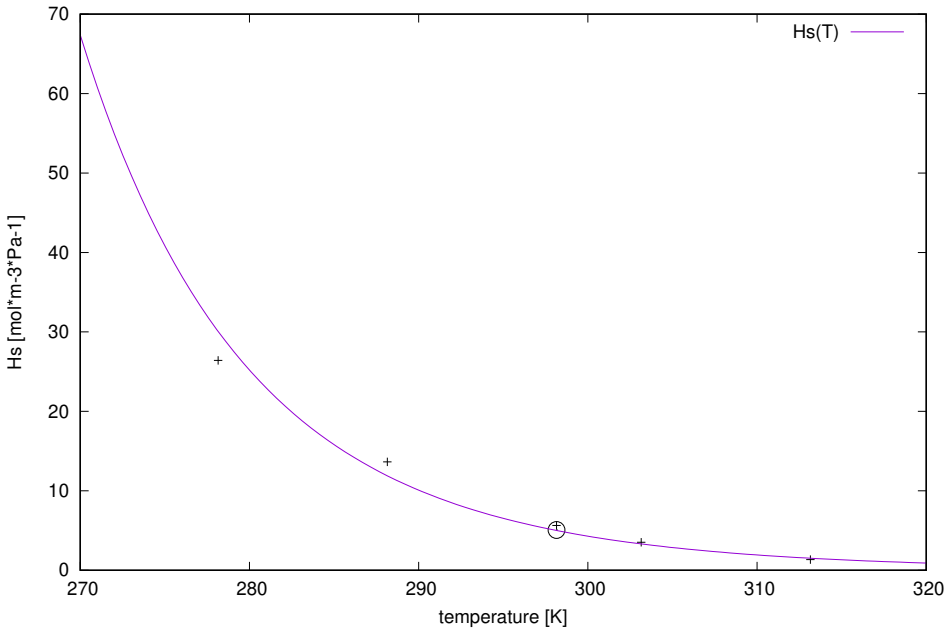

ref = 3683; chem = PBDE-192; casrn = 407578-53-4; r2 = 0.98734

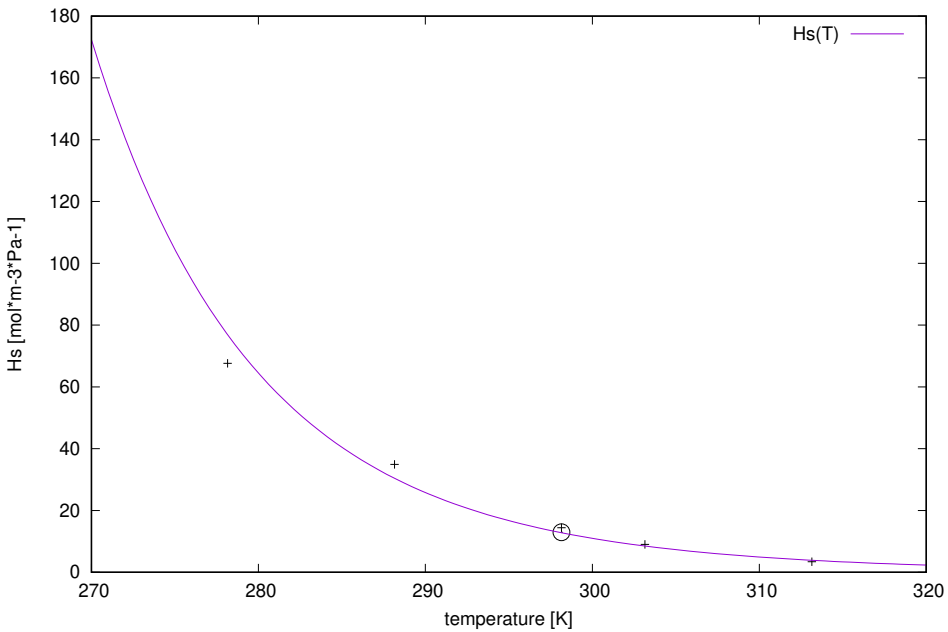



ref = 3683; chem = PBDE-18; casrn = 407606-55-7; r2 = 0.98757

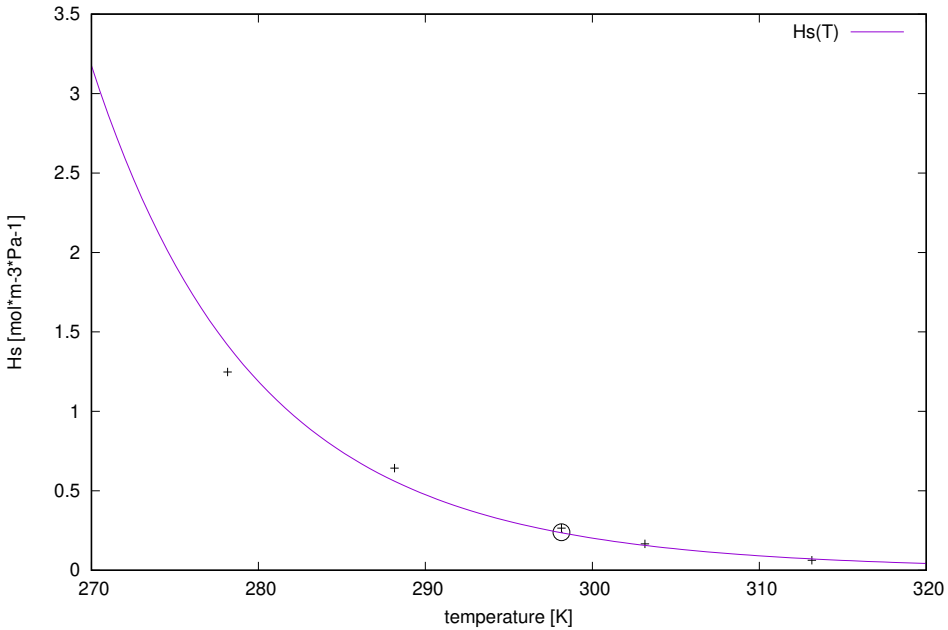

ref = 3683; chem = PBDE-39; casrn = 407606-57-9; r2 = 0.98757

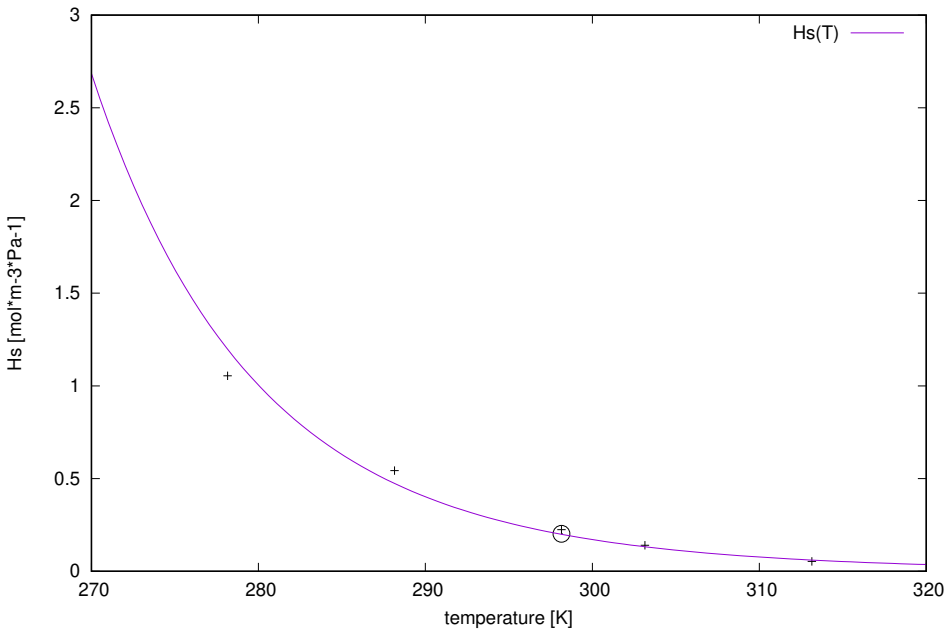

ref = 3683; chem = PBDE-172; casrn = 407606-59-1; r2 = 0.98734

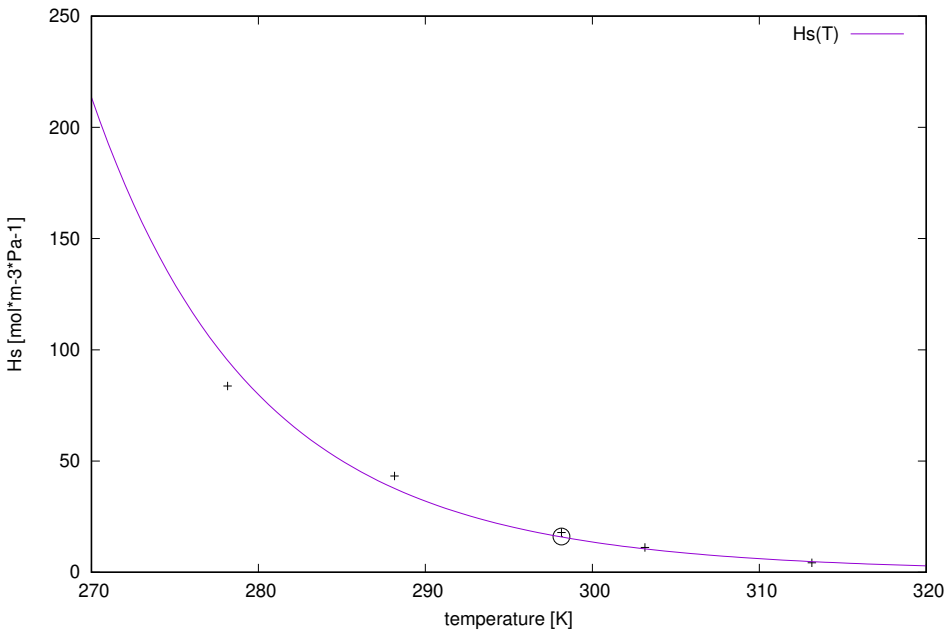

ref = 3683; chem = PBDE-176; casrn = 407606-61-5; r2 = 0.98747

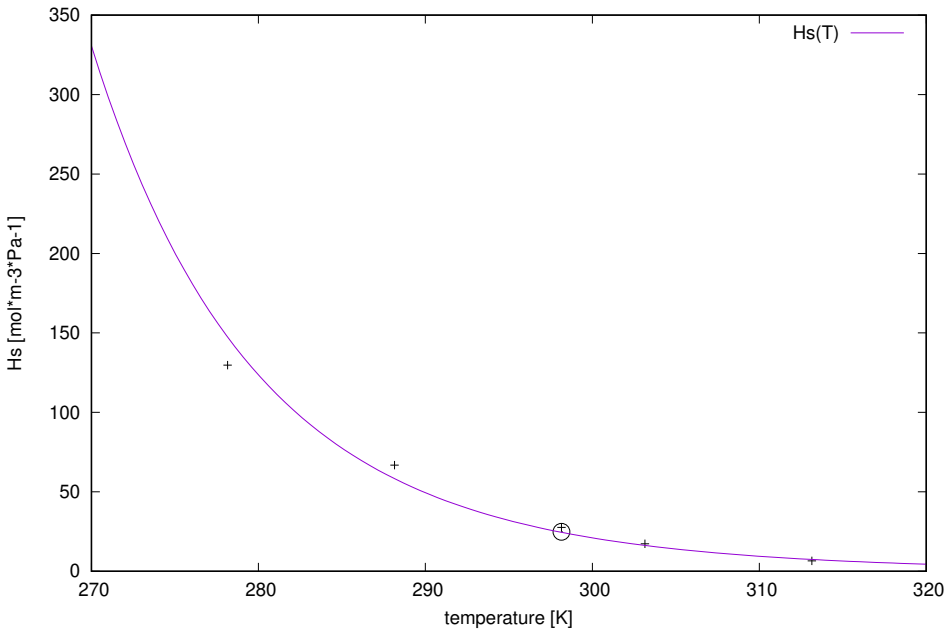

ref = 3683; chem = PBDE-28; casrn = 41318-75-6; r2 = 0.97125

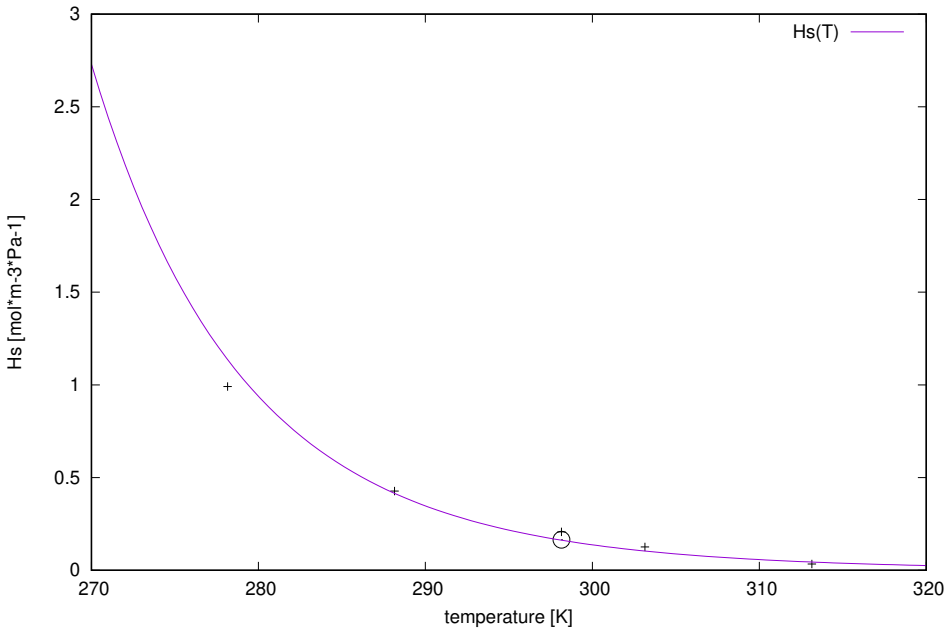

ref = 3683; chem = PBDE-120; casrn = 417727-71-0; r2 = 0.98734

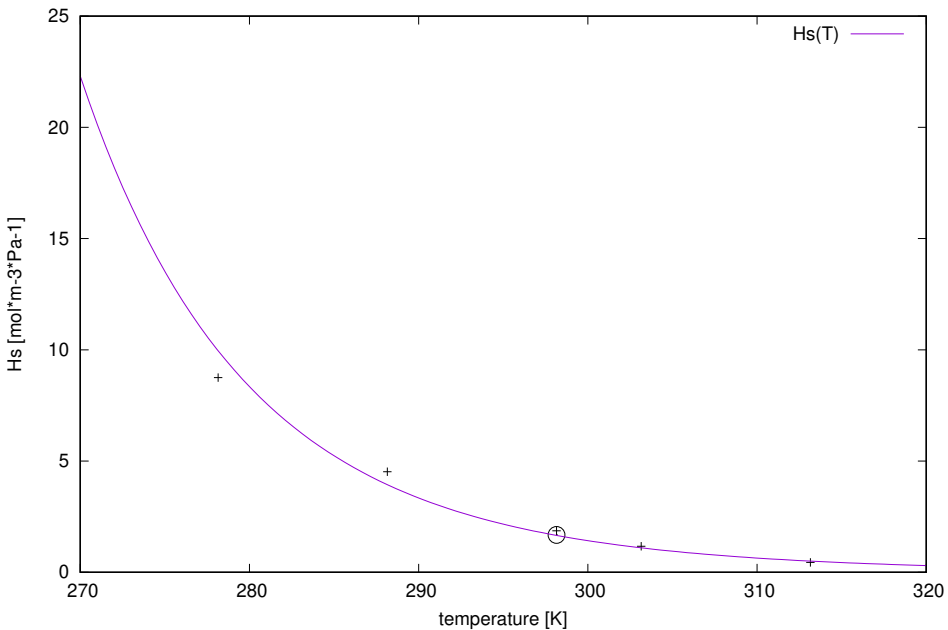

ref = 3683; chem = PBDE-208; casrn = 437701-78-5; r2 = 0.98734

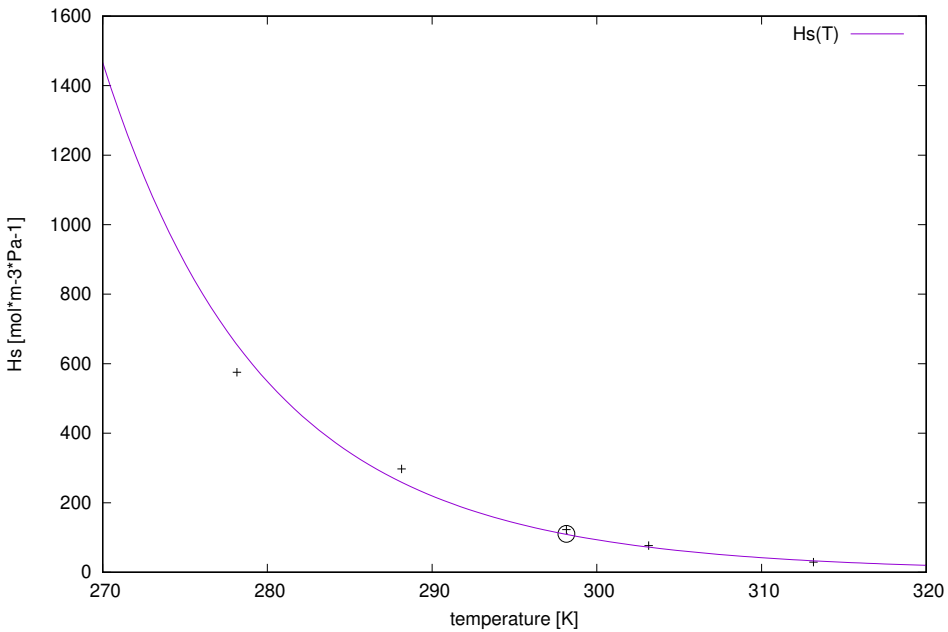

ref = 3683; chem = PBDE-207; casrn = 437701-79-6; r2 = 0.98734

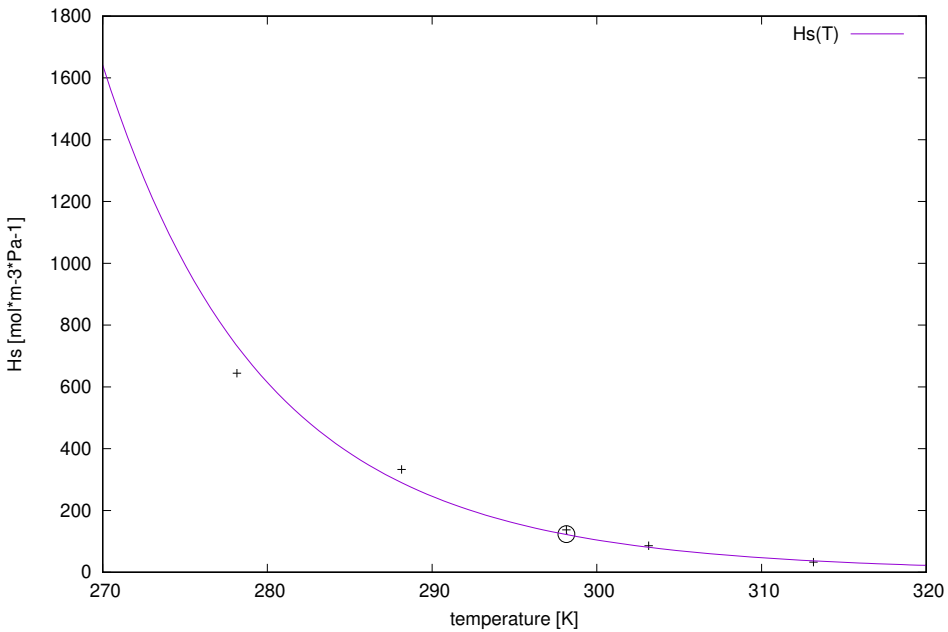



ref = 3683; chem = PBDE-182; casrn = 442690-45-1; r2 = 0.98734

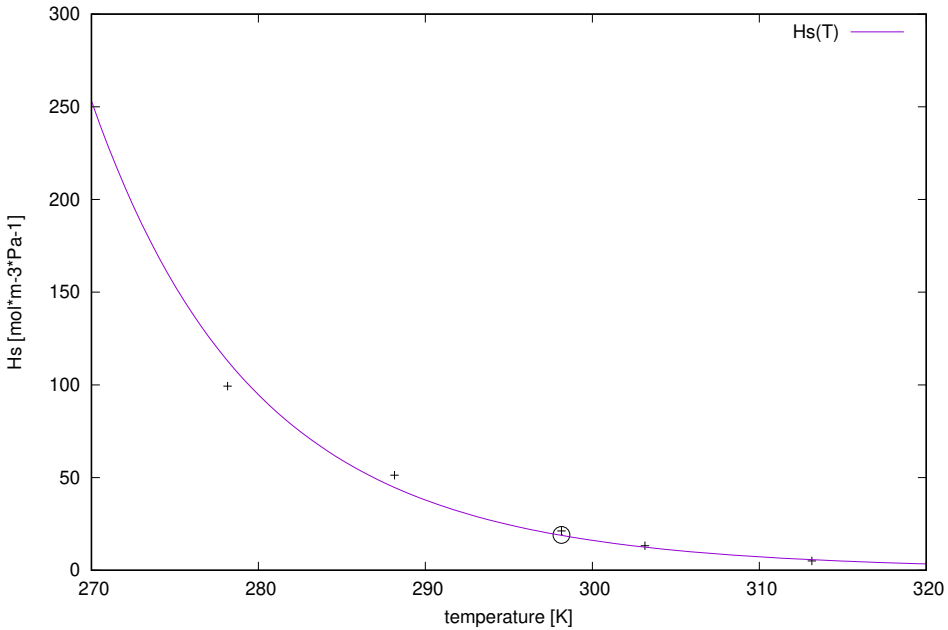

ref = 3683; chem = PBDE-5; casrn = 446254-14-4; r2 = 0.98734

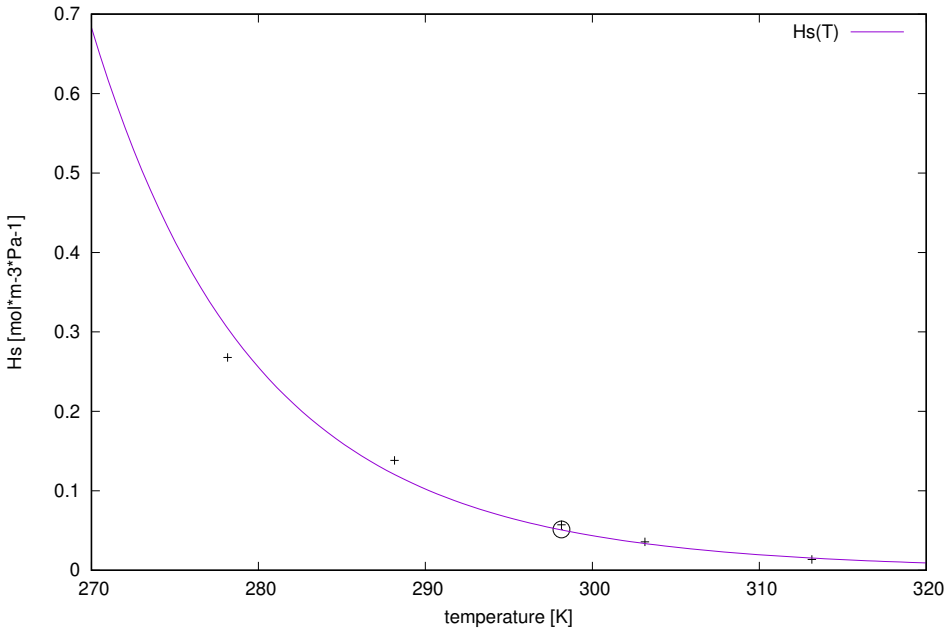

ref = 3683; chem = PBDE-22; casrn = 446254-15-5; r2 = 0.98734

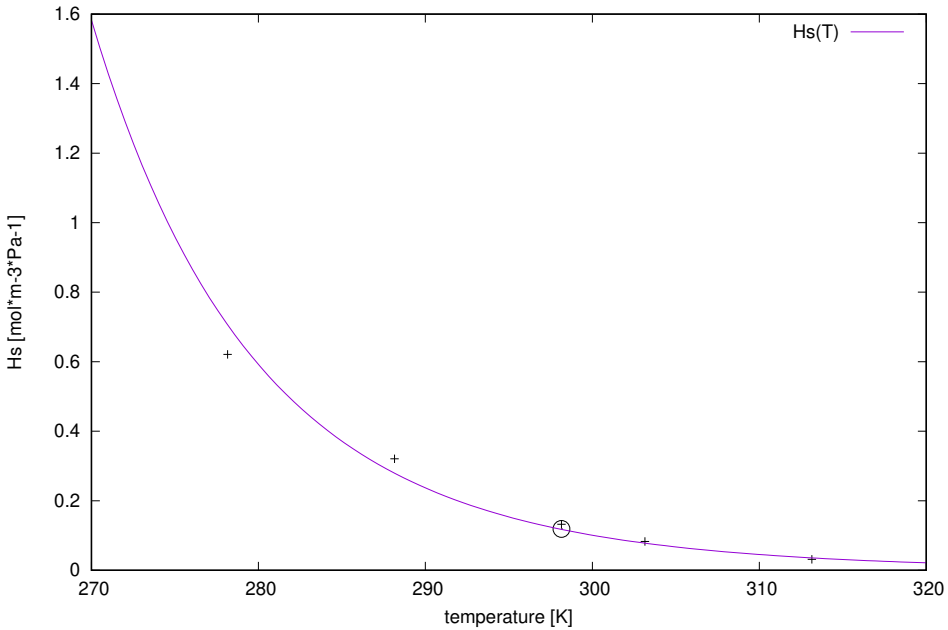

ref = 3683; chem = PBDE-23; casrn = 446254-16-6; r2 = 0.98734

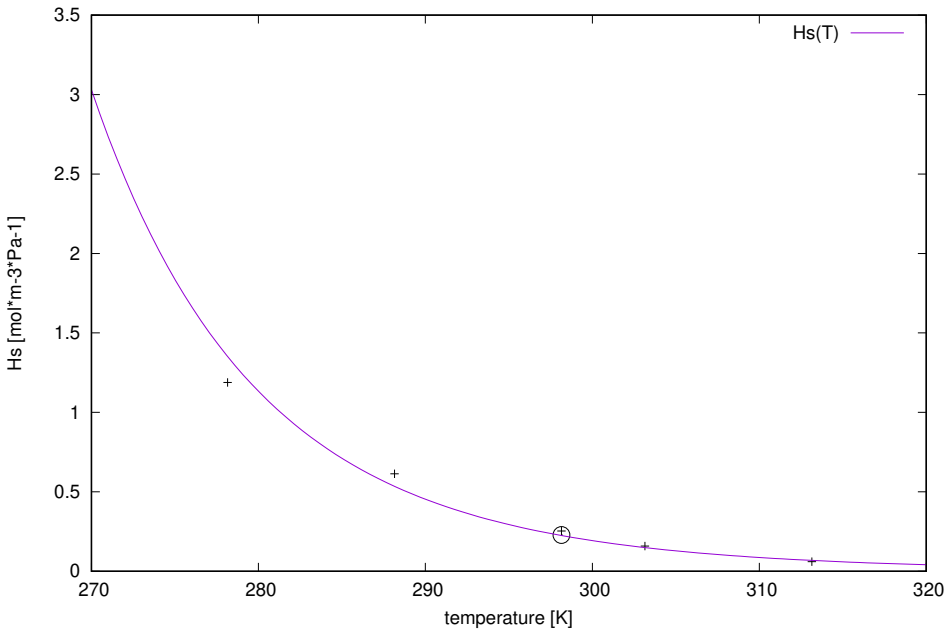

ref = 3683; chem = PBDE-34; casrn = 446254-17-7; r2 = 0.98734

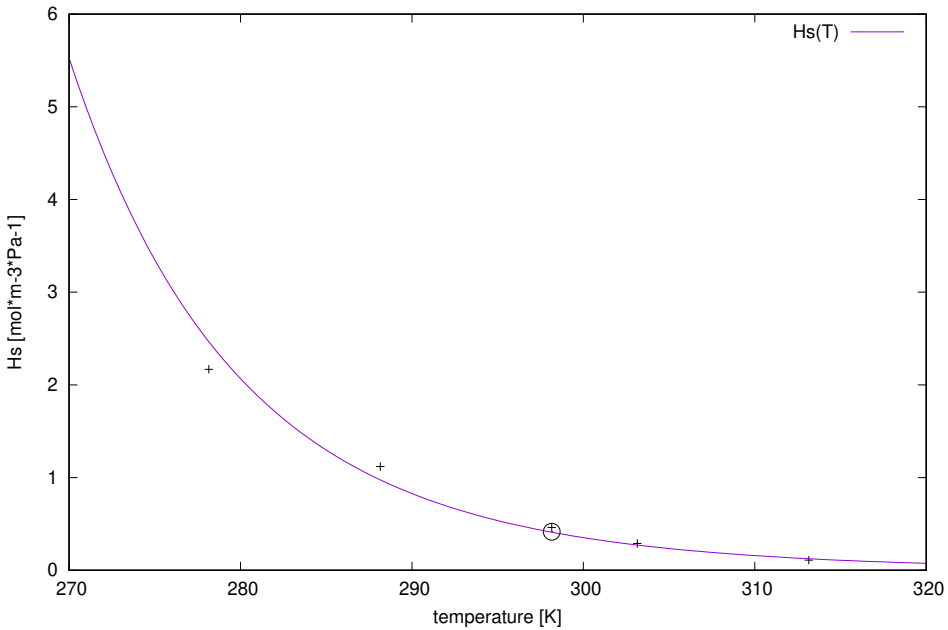

ref = 3683; chem = PBDE-42; casrn = 446254-18-8; r2 = 0.98734

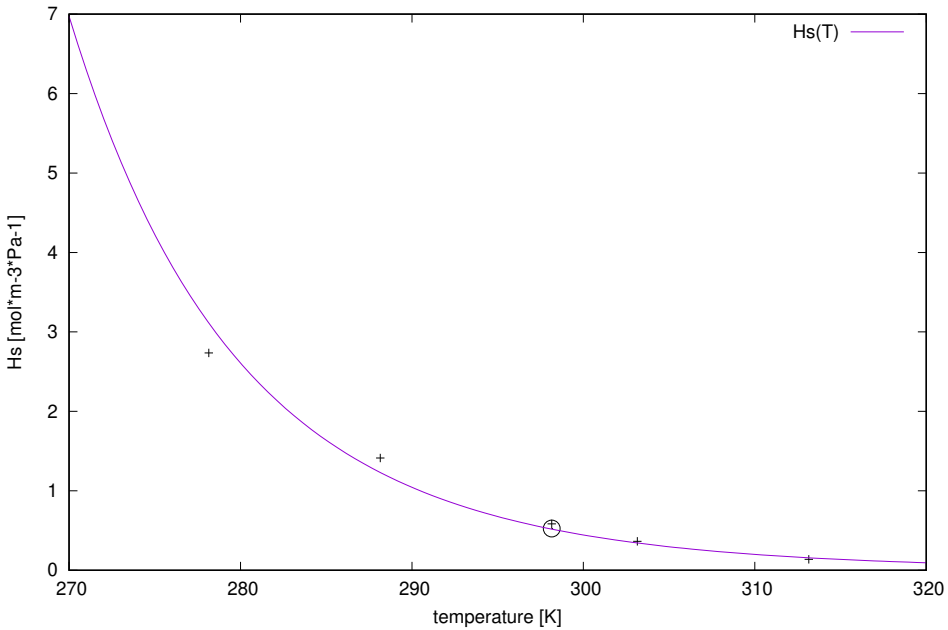

ref = 3683; chem = PBDE-43; casrn = 446254-19-9; r2 = 0.98734

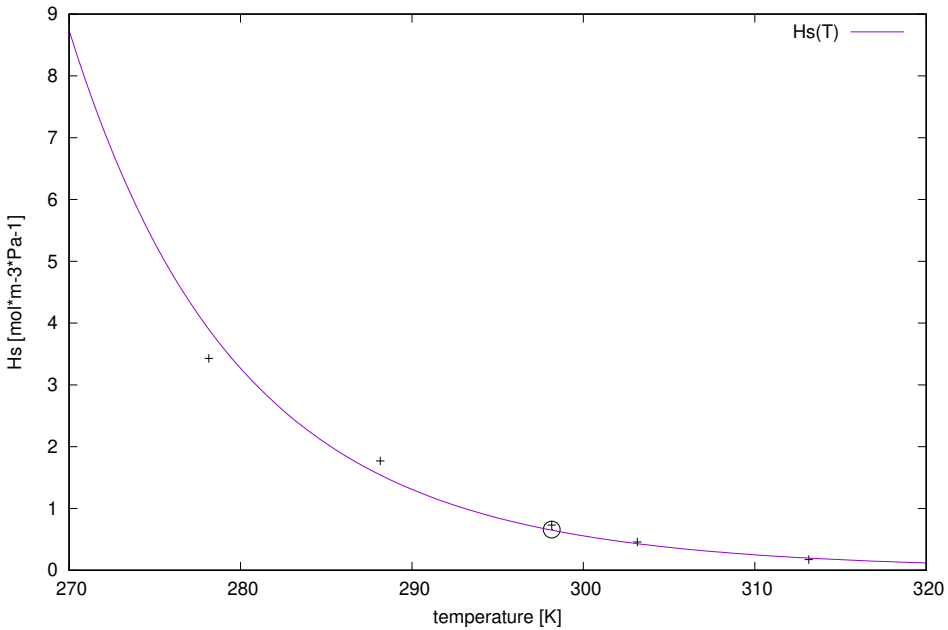

ref = 3683; chem = PBDE-44; casrn = 446254-20-2; r2 = 0.98734

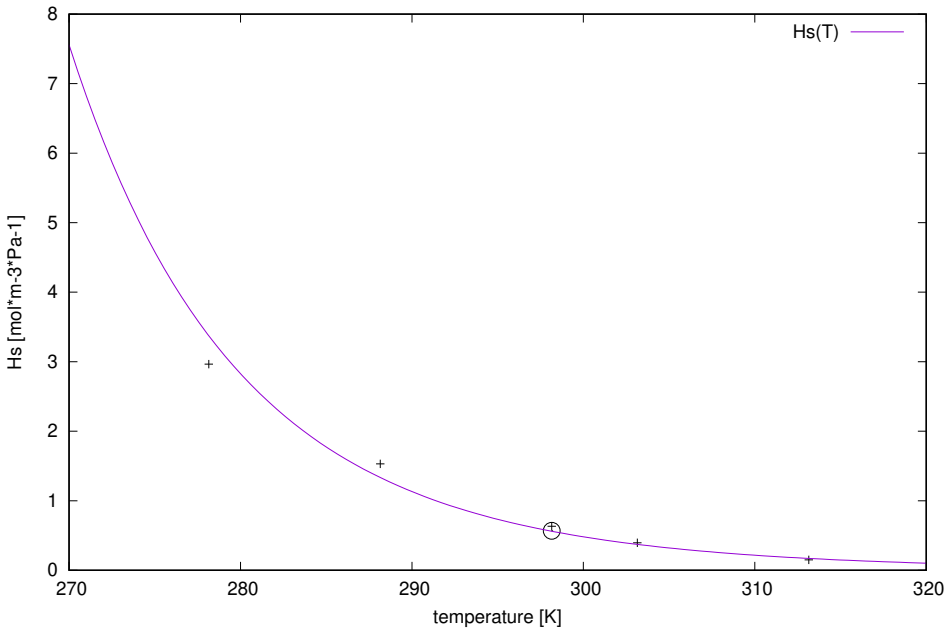



ref = 3683; chem = PBDE-45; casrn = 446254-21-3; r2 = 0.98734

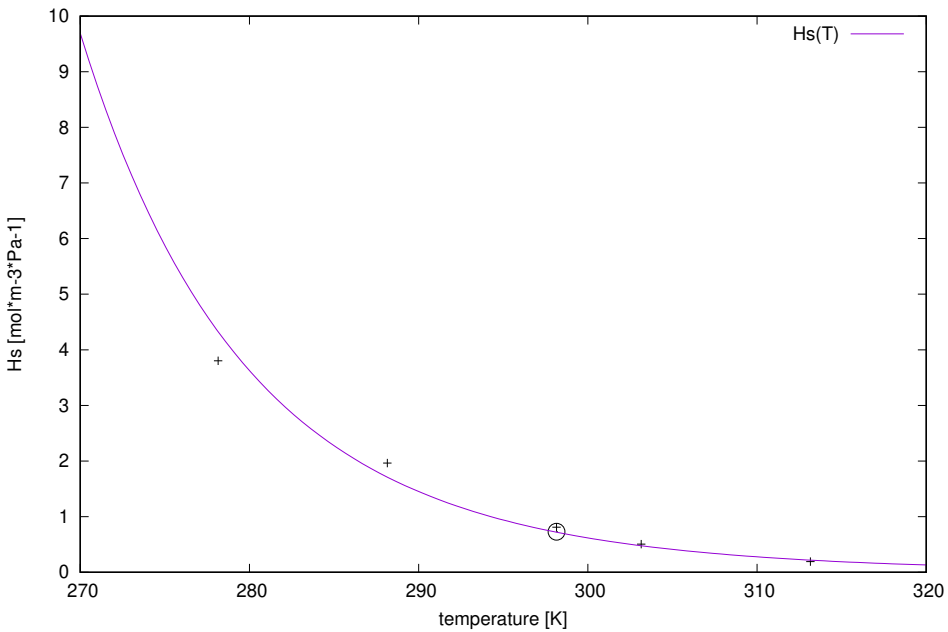

ref = 3683; chem = PBDE-46; casrn = 446254-22-4; r2 = 0.98734

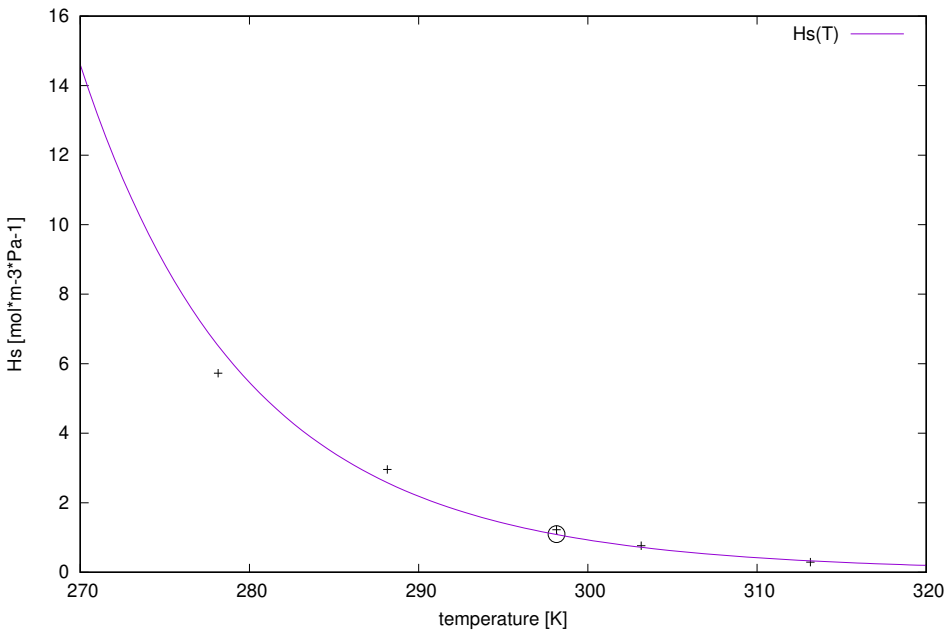

ref = 3683; chem = PBDE-50; casrn = 446254-23-5; r2 = 0.98734

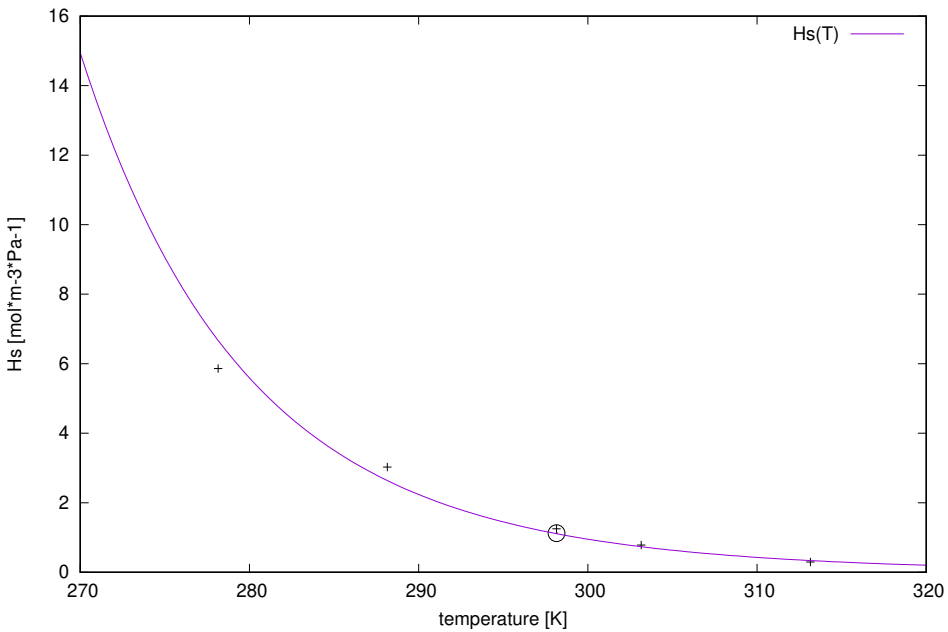

ref = 3683; chem = PBDE-52; casrn = 446254-24-6; r2 = 0.98734

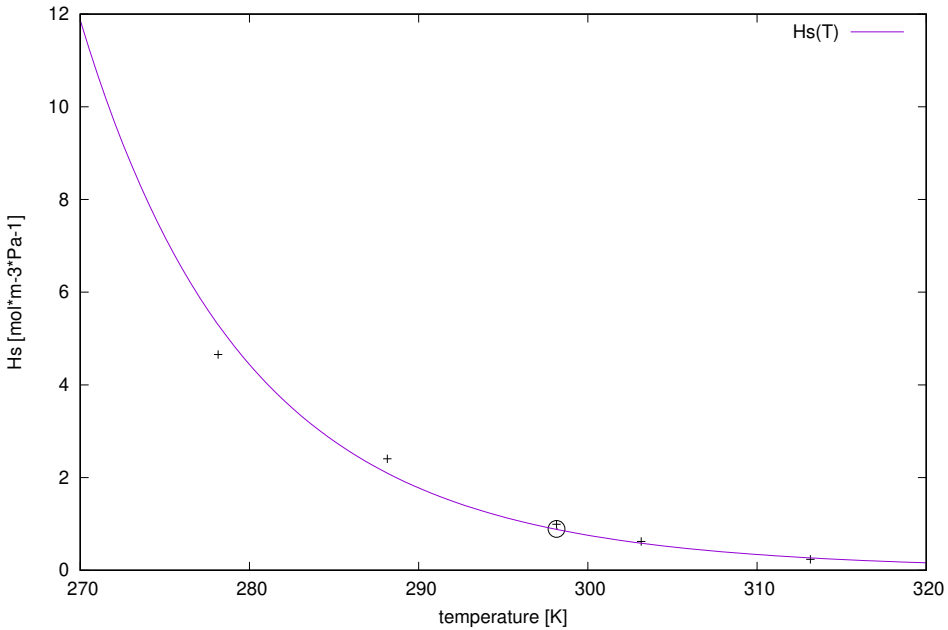

ref = 3683; chem = PBDE-53; casrn = 446254-25-7; r2 = 0.98734

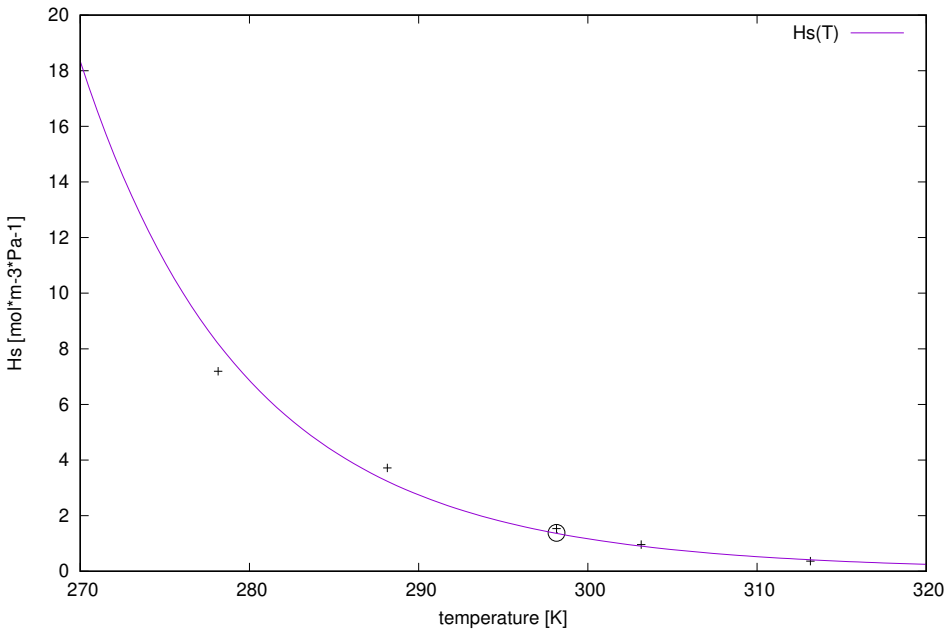

ref = 3683; chem = PBDE-54; casrn = 446254-26-8; r2 = 0.98757

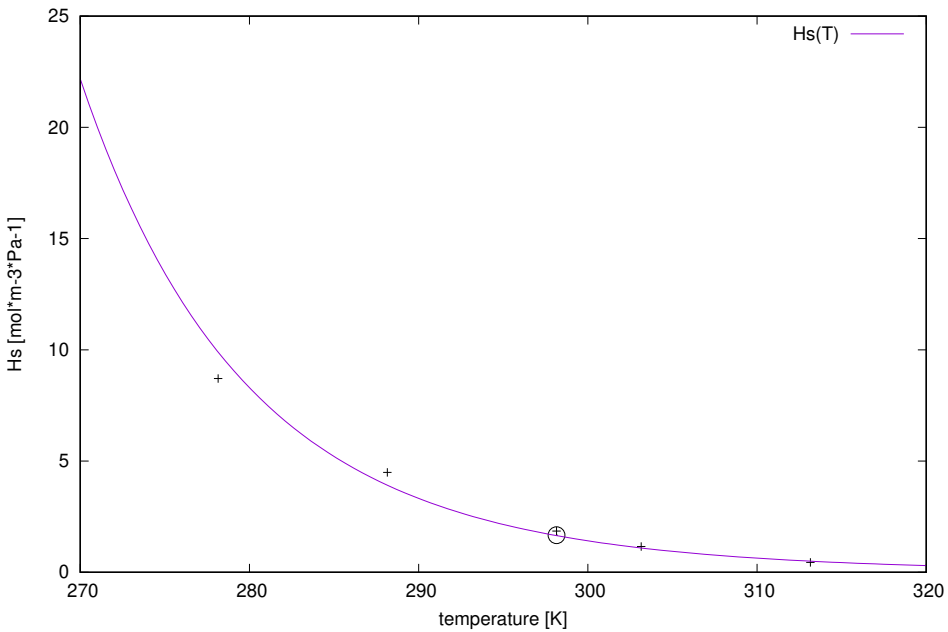

ref = 3683; chem = PBDE-55; casrn = 446254-27-9; r2 = 0.98734

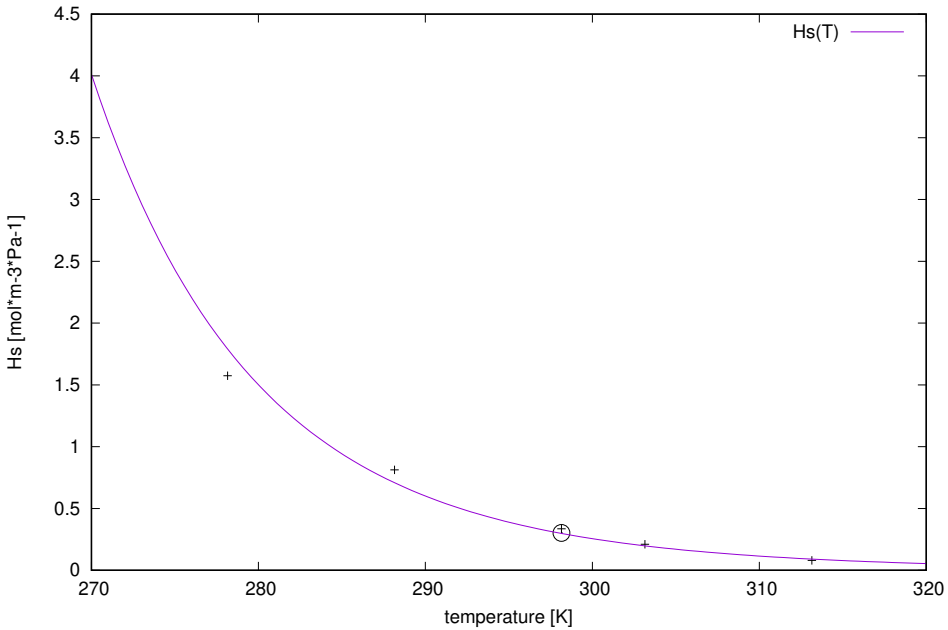

ref = 3683; chem = PBDE-56; casrn = 446254-28-0; r2 = 0.98734

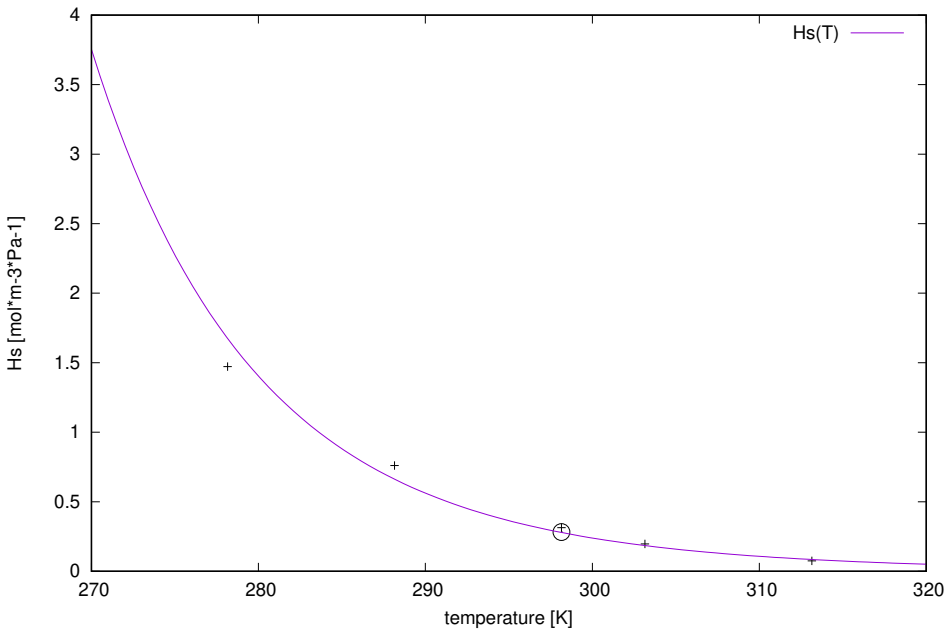



ref = 3683; chem = PBDE-58; casrn = 446254-29-1; r2 = 0.98734

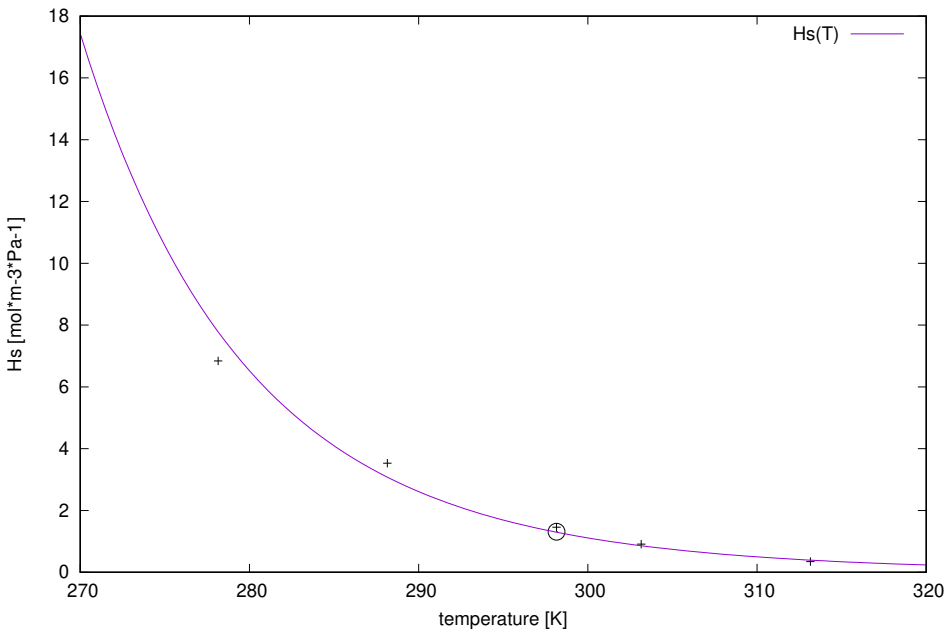

ref = 3683; chem = PBDE-59; casrn = 446254-30-4; r2 = 0.98734

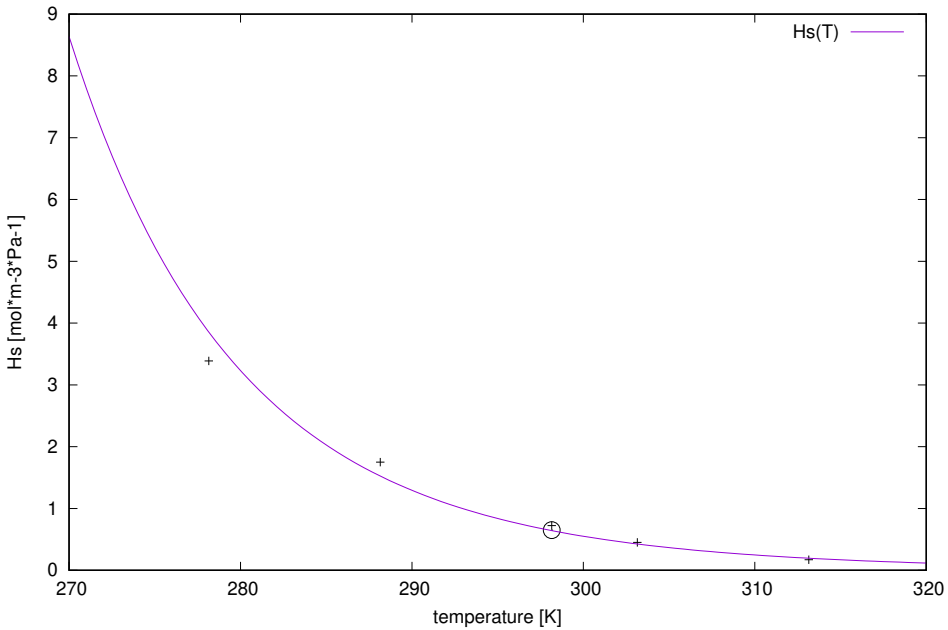

ref = 3683; chem = PBDE-60; casrn = 446254-31-5; r2 = 0.98734

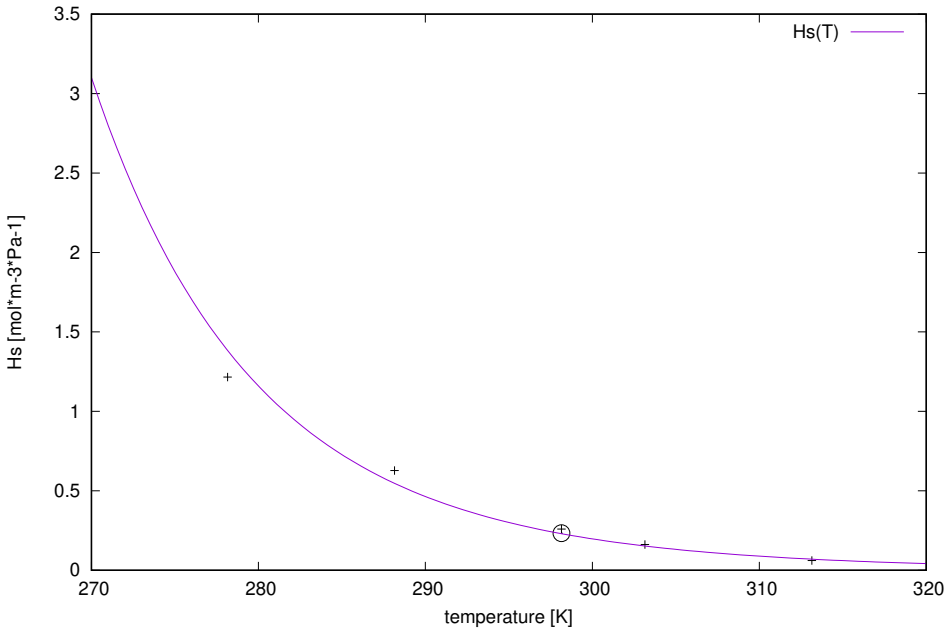

ref = 3683; chem = PBDE-61; casrn = 446254-32-6; r2 = 0.98747

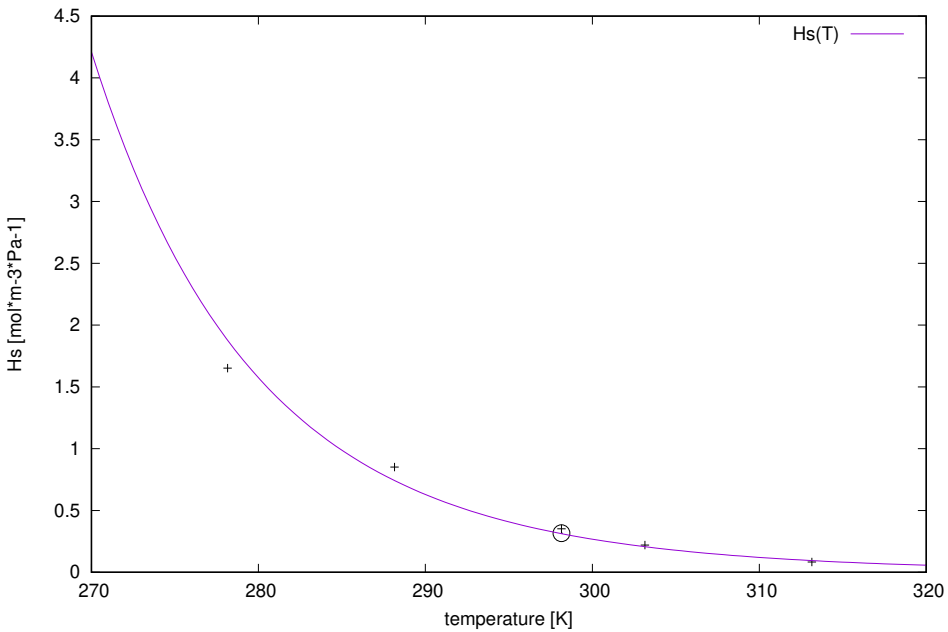

ref = 3683; chem = PBDE-62; casrn = 446254-33-7; r2 = 0.98734

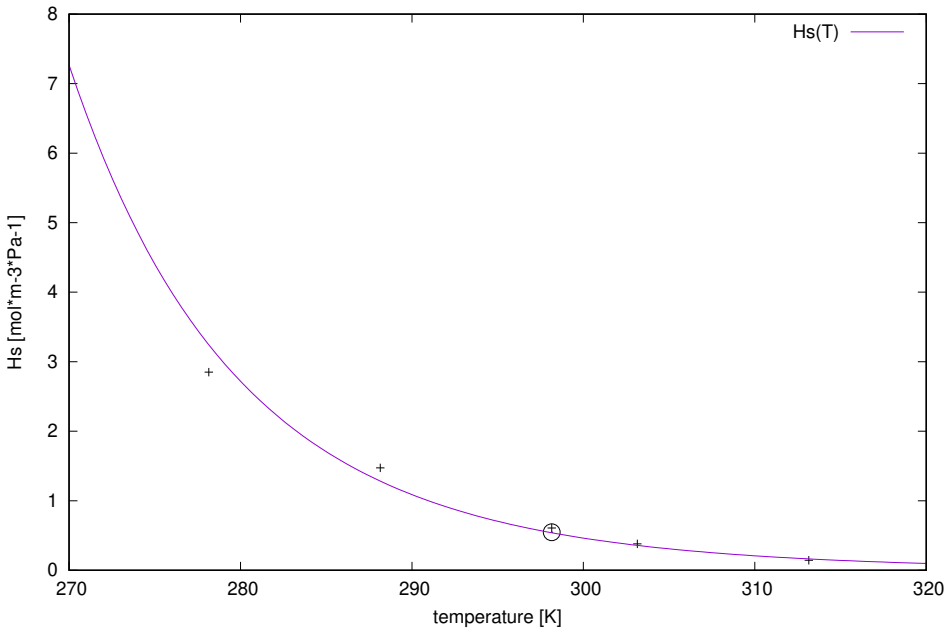

ref = 3683; chem = PBDE-63; casrn = 446254-34-8; r2 = 0.98757

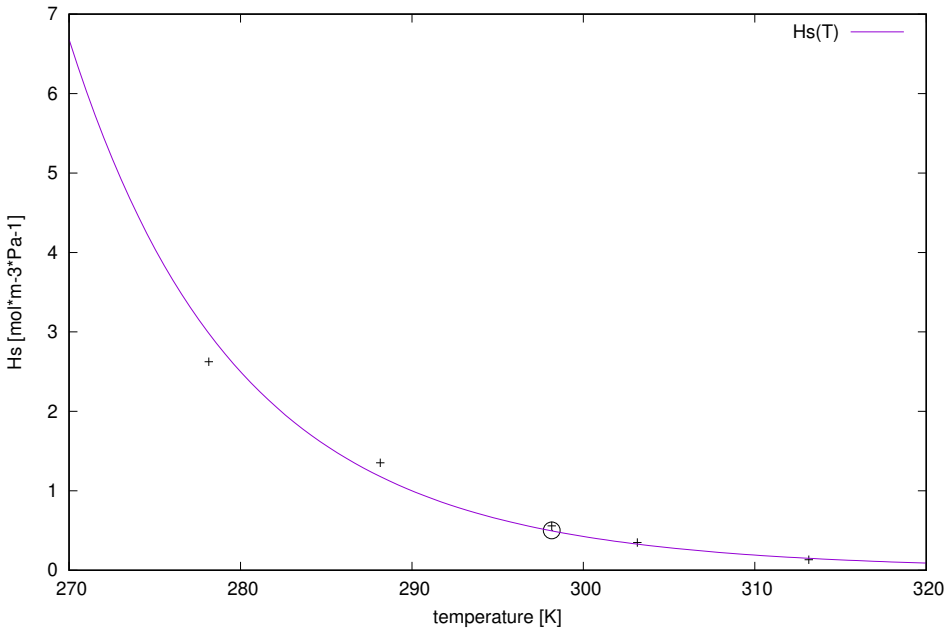

ref = 3683; chem = PBDE-64; casrn = 446254-35-9; r2 = 0.98734

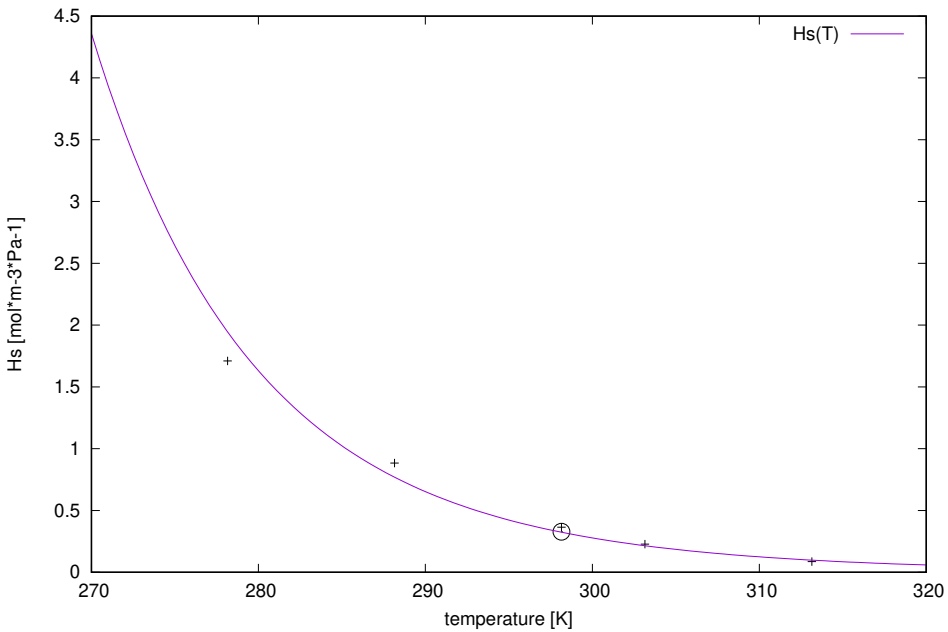

ref = 3683; chem = PBDE-65; casrn = 446254-36-0; r2 = 0.98747

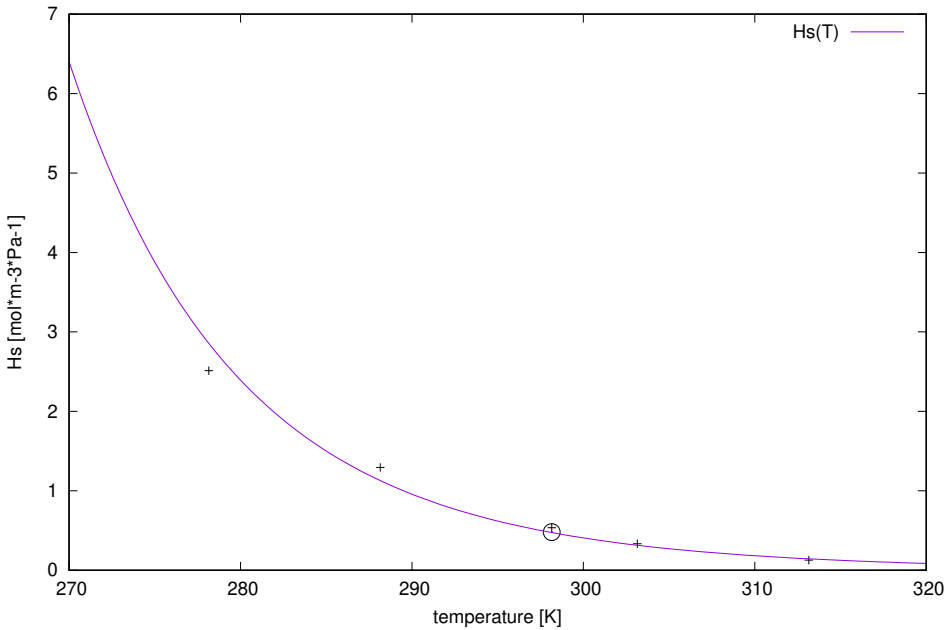



ref = 3683; chem = PBDE-67; casrn = 446254-37-1; r2 = 0.98734

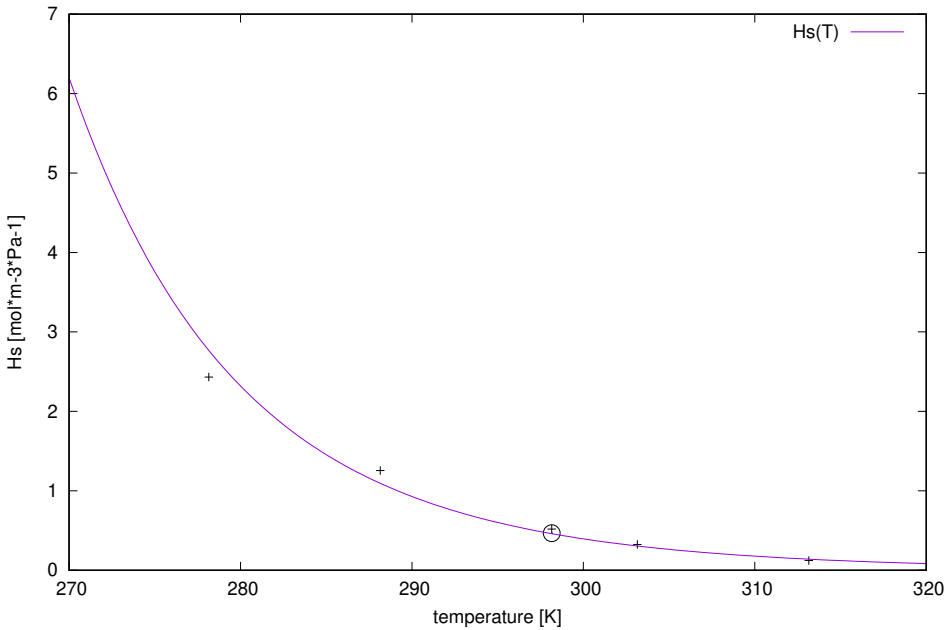

ref = 3683; chem = PBDE-68; casrn = 446254-38-2; r2 = 0.98734

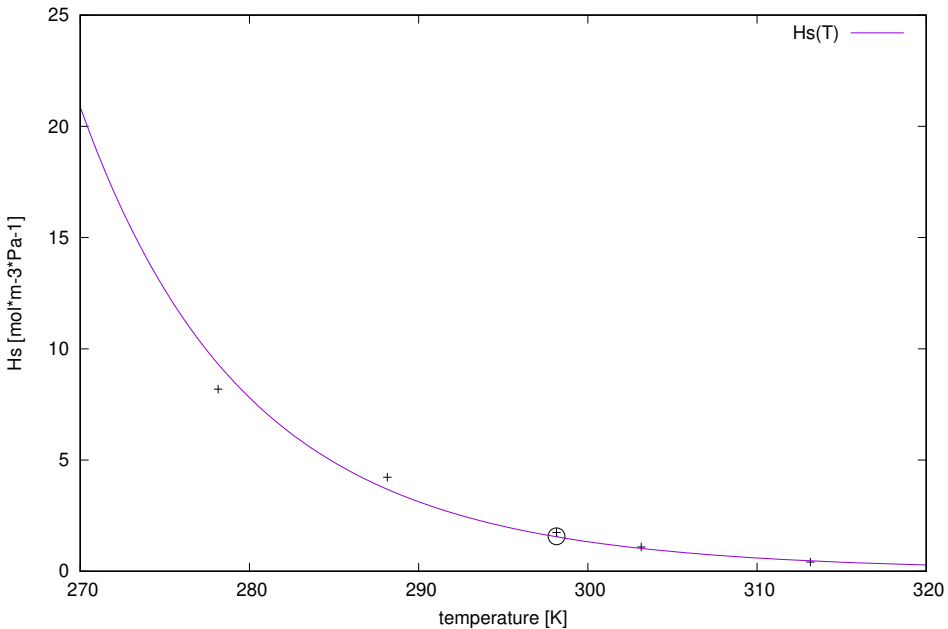

ref = 3683; chem = PBDE-70; casrn = 446254-39-3; r2 = 0.98747

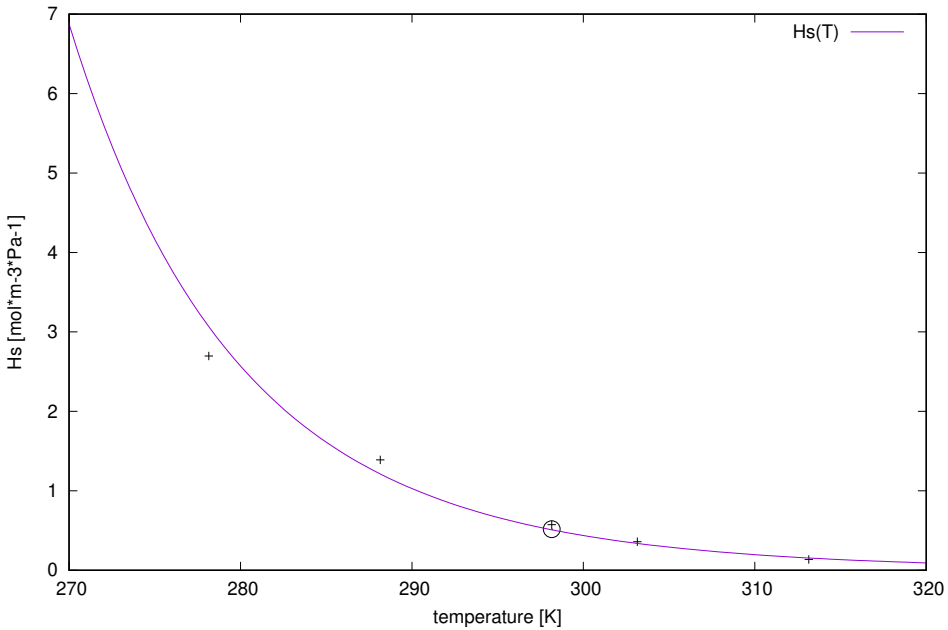

ref = 3683; chem = PBDE-72; casrn = 446254-40-6; r2 = 0.98734

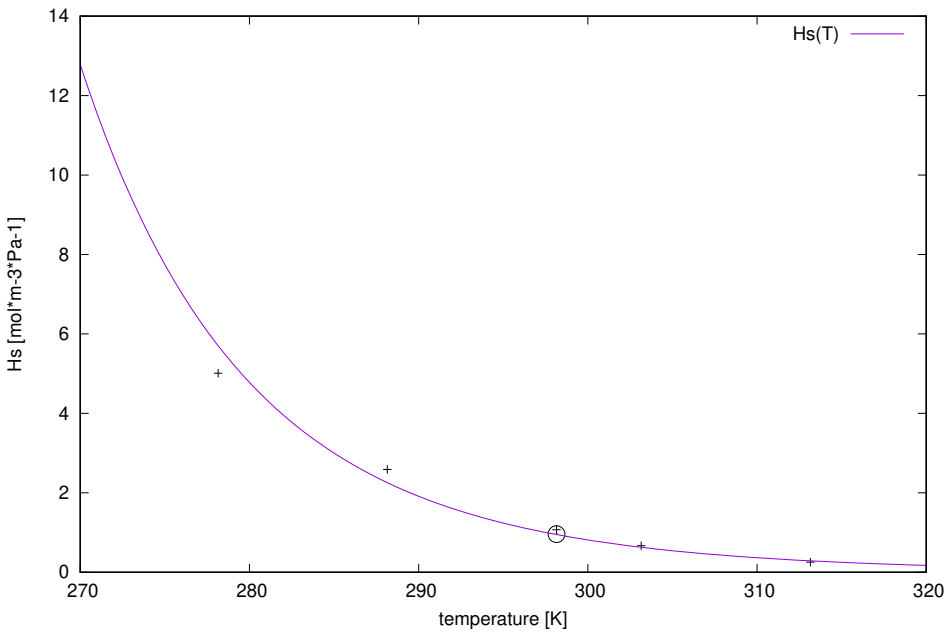

ref = 3683; chem = PBDE-73; casrn = 446254-41-7; r2 = 0.98734

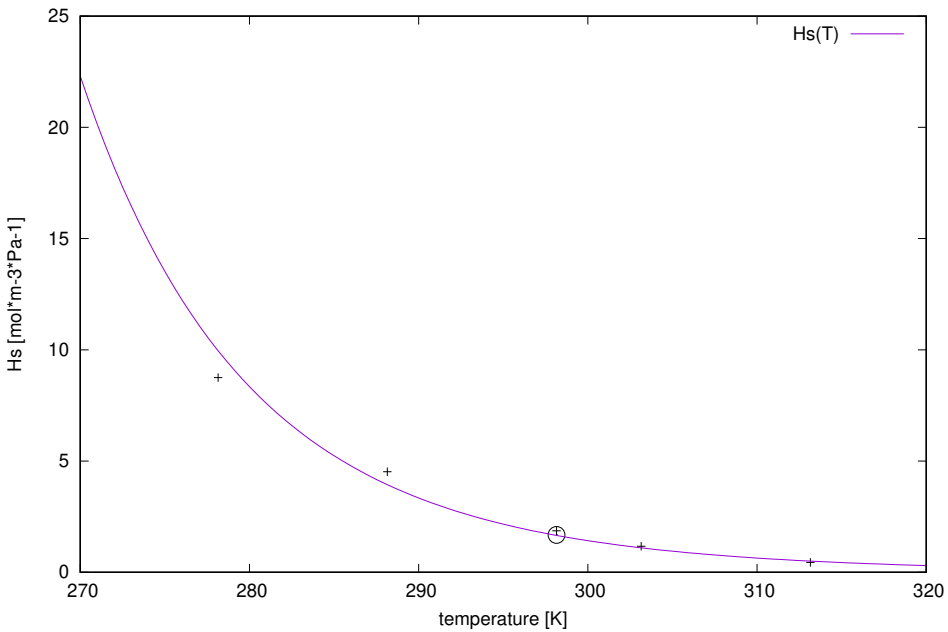

ref = 3683; chem = PBDE-74; casrn = 446254-42-8; r2 = 0.98734

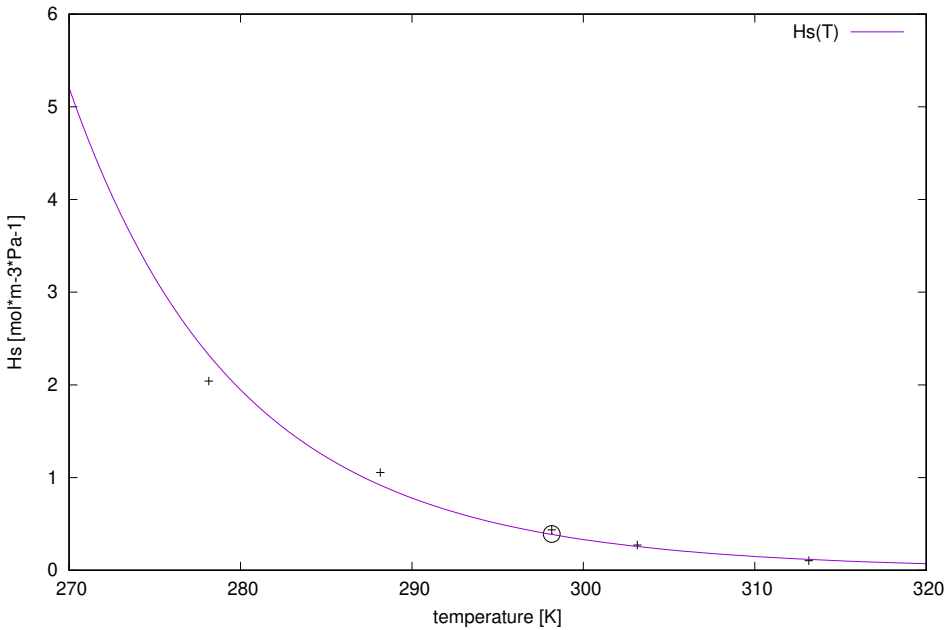

ref = 3683; chem = PBDE-76; casrn = 446254-43-9; r2 = 0.98734

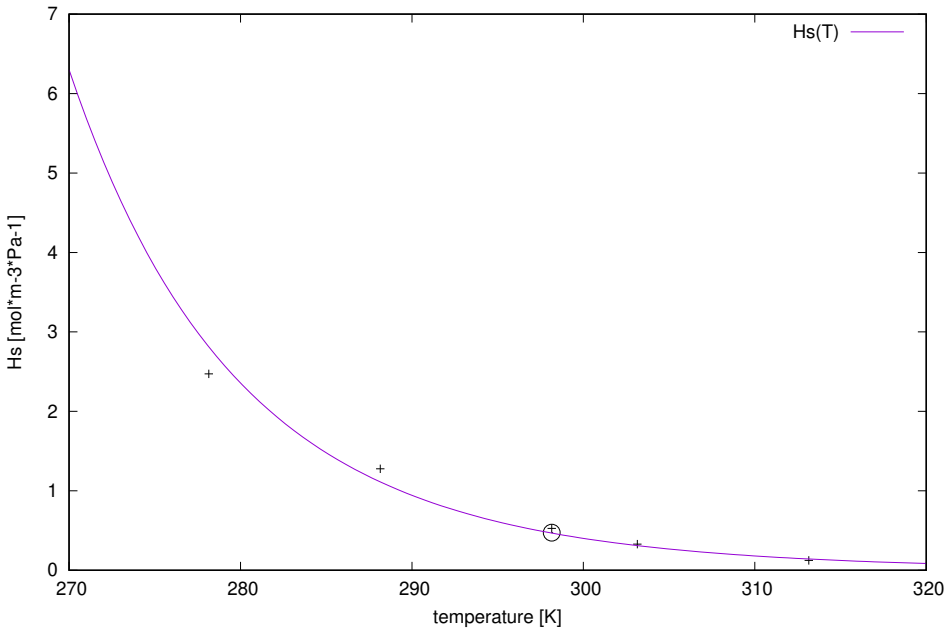

ref = 3683; chem = PBDE-78; casrn = 446254-45-1; r2 = 0.98734

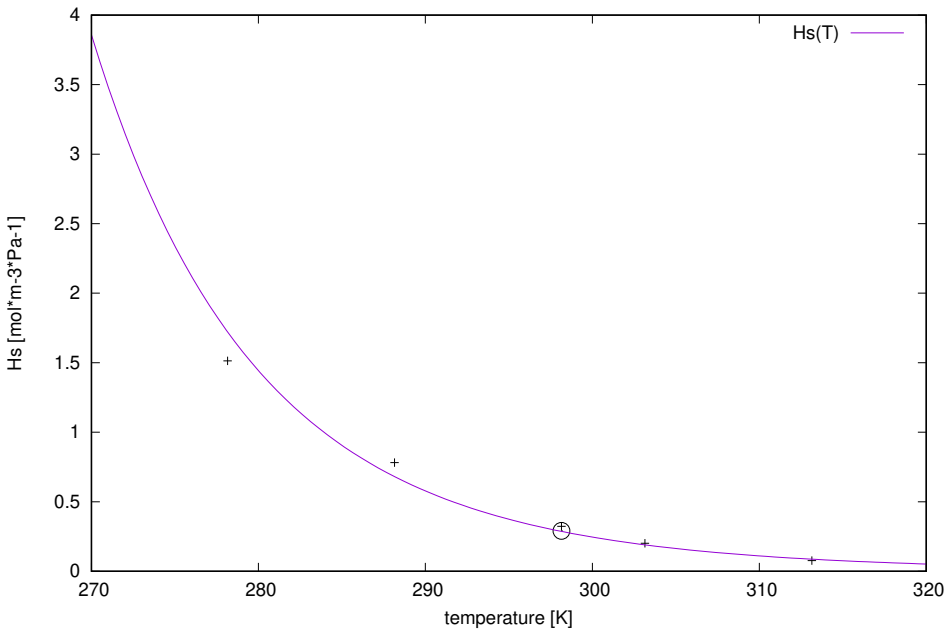



ref = 3683; chem = PBDE-79; casrn = 446254-48-4; r2 = 0.98734



ref = 3683; chem = PBDE-81; casrn = 446254-50-8; r2 = 0.98747

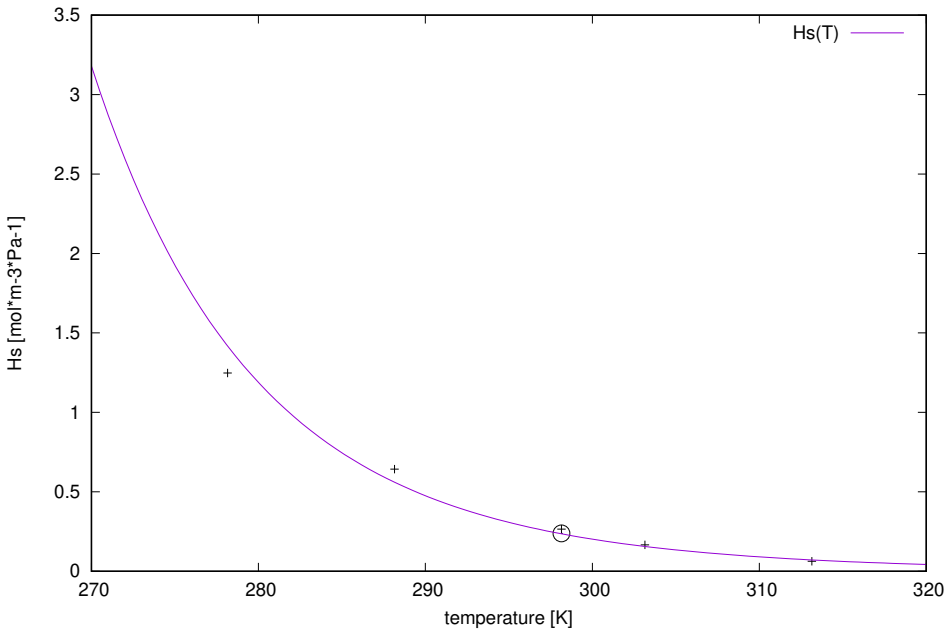

ref = 3683; chem = PBDE-83; casrn = 446254-51-9; r2 = 0.98734

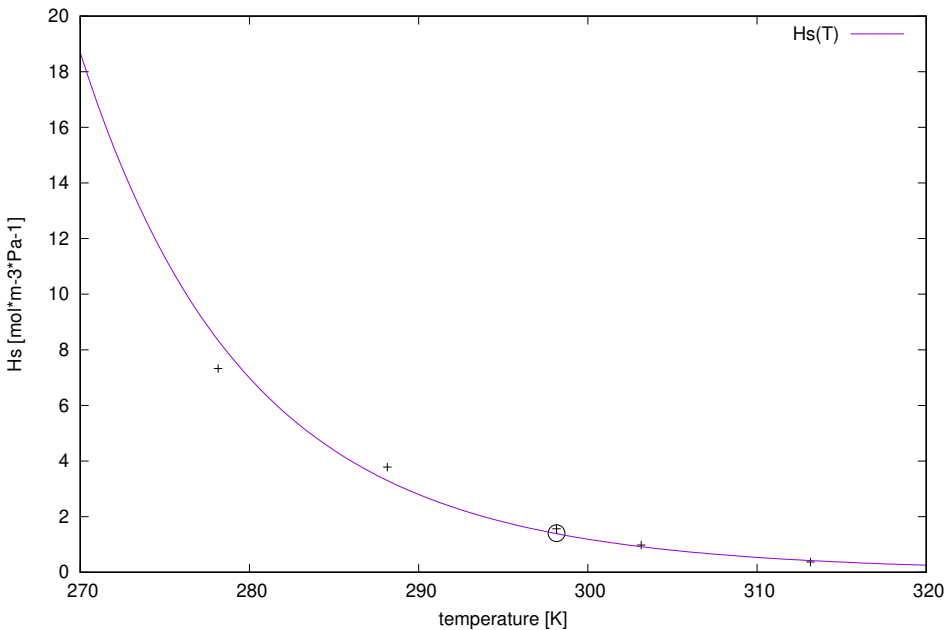

ref = 3683; chem = PBDE-84; casrn = 446254-52-0; r2 = 0.98747

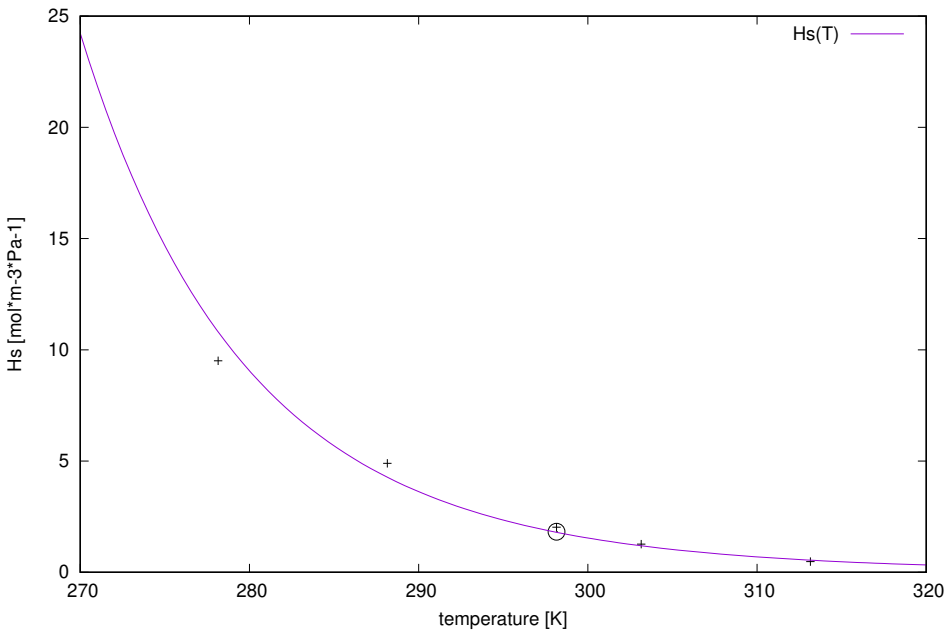

ref = 3683; chem = PBDE-86; casrn = 446254-53-1; r2 = 0.98734

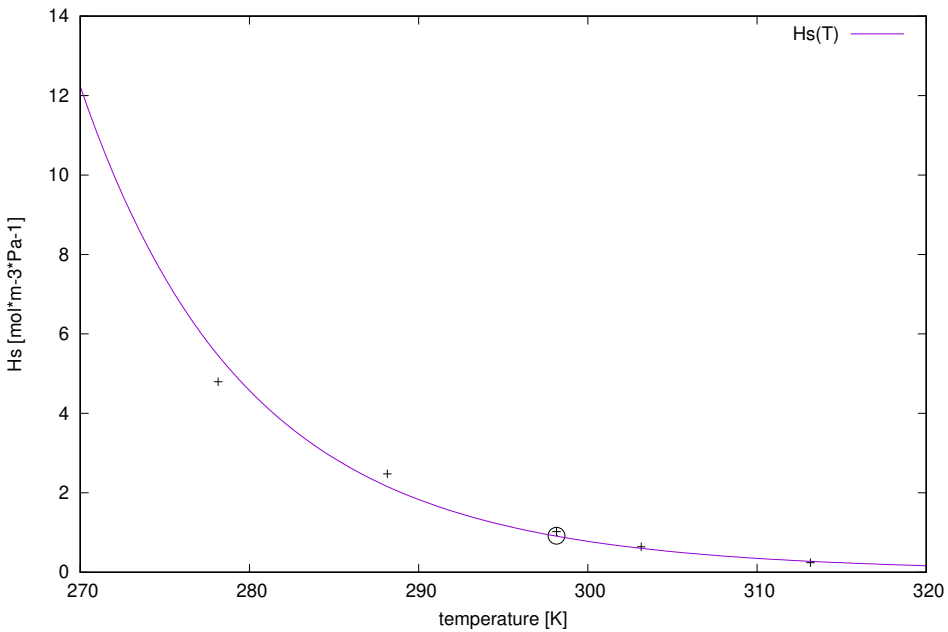

ref = 3683; chem = PBDE-87; casrn = 446254-54-2; r2 = 0.98757

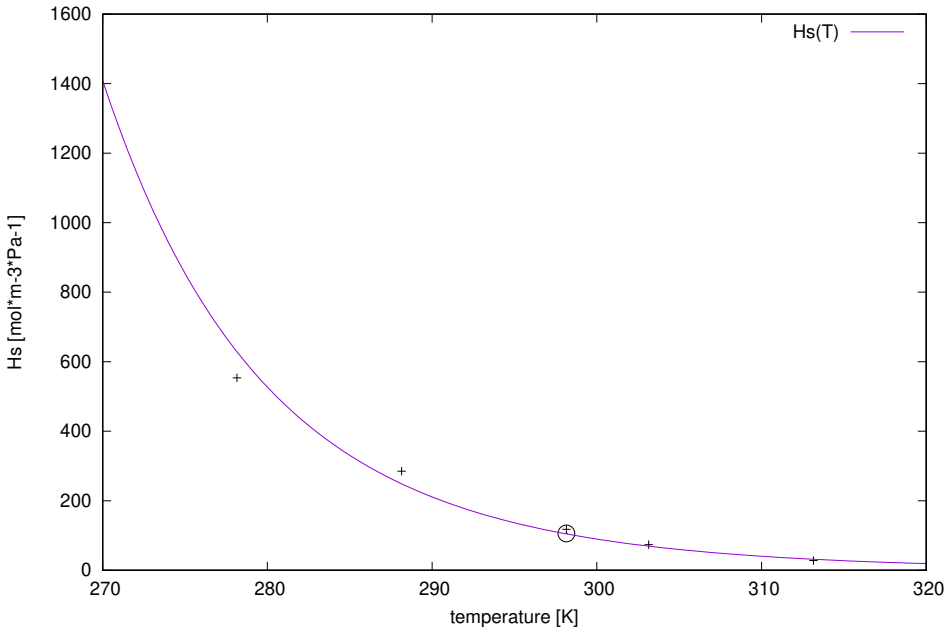

ref = 3683; chem = PBDE-88; casrn = 446254-55-3; r2 = 0.98734

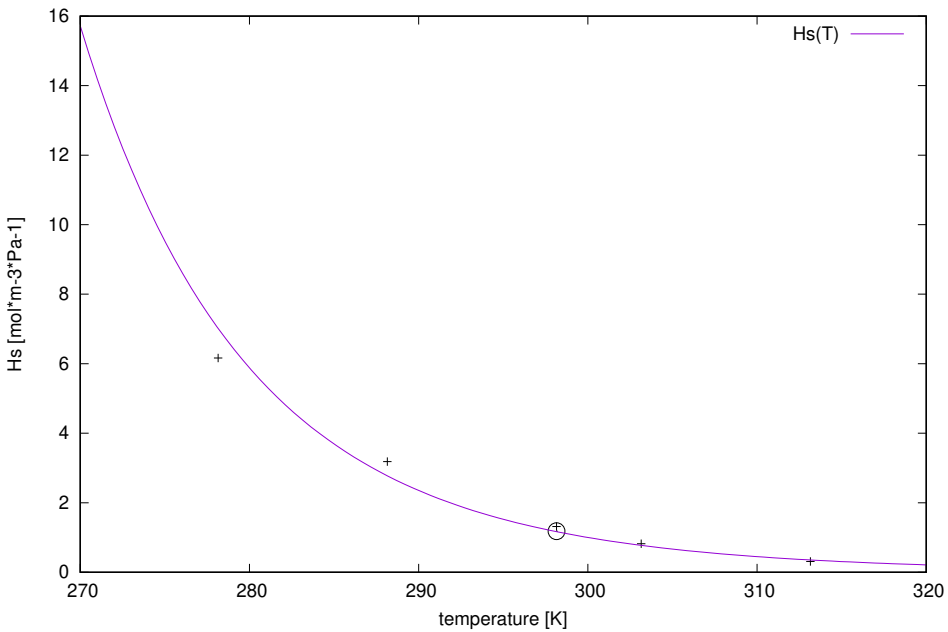

ref = 3683; chem = PBDE-89; casrn = 446254-56-4; r2 = 0.98734

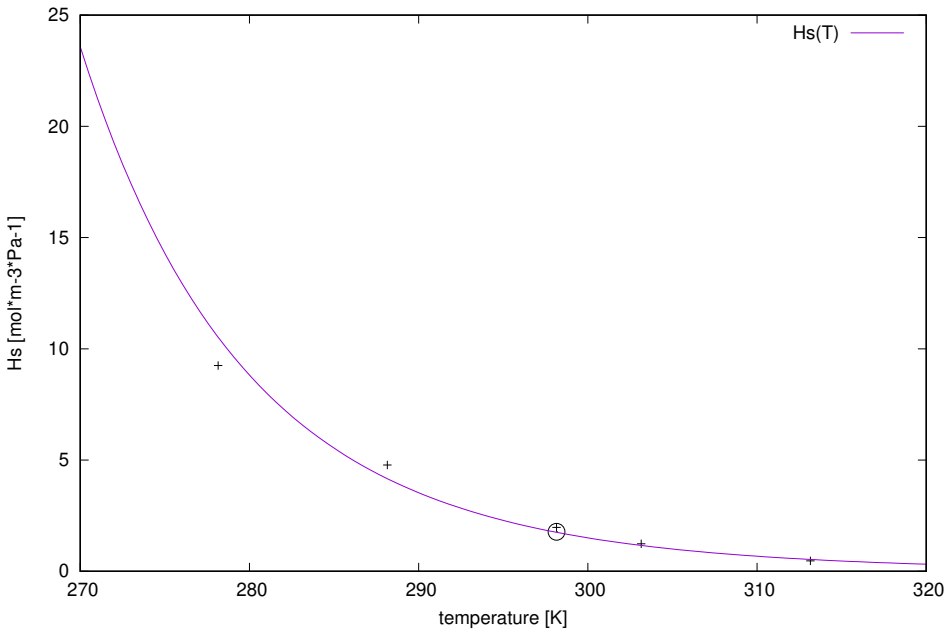



ref = 3683; chem = PBDE-90; casrn = 446254-57-5; r2 = 0.98734

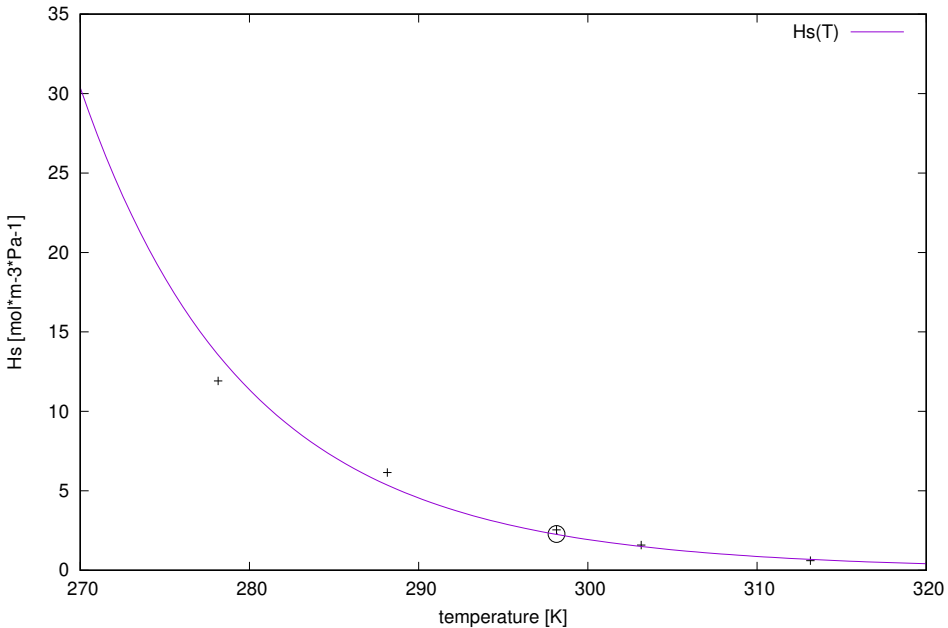

ref = 3683; chem = PBDE-91; casrn = 446254-58-6; r2 = 0.98734



ref = 3683; chem = PBDE-92; casrn = 446254-59-7; r2 = 0.98734

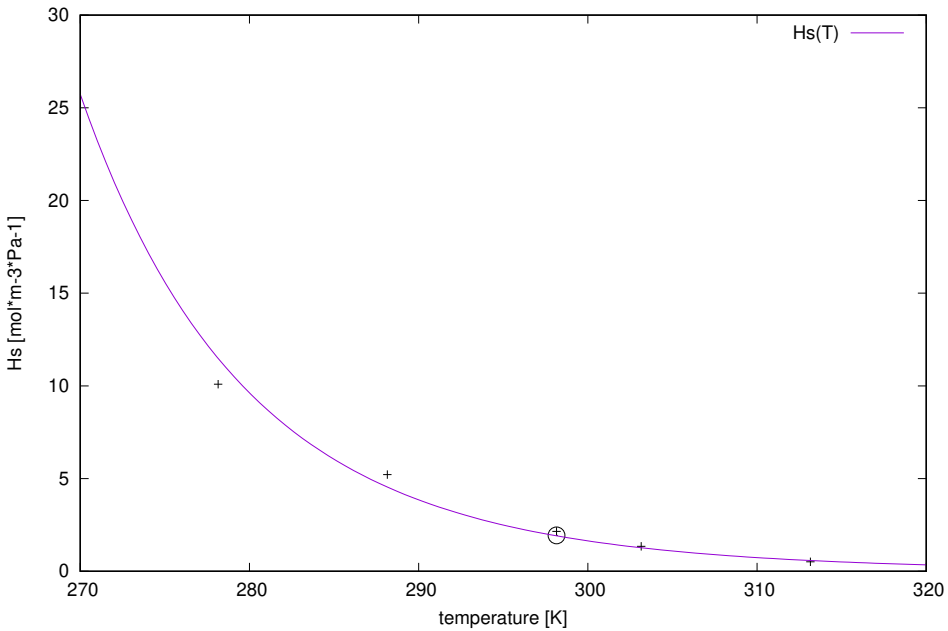

ref = 3683; chem = PBDE-93; casrn = 446254-60-0; r2 = 0.98757

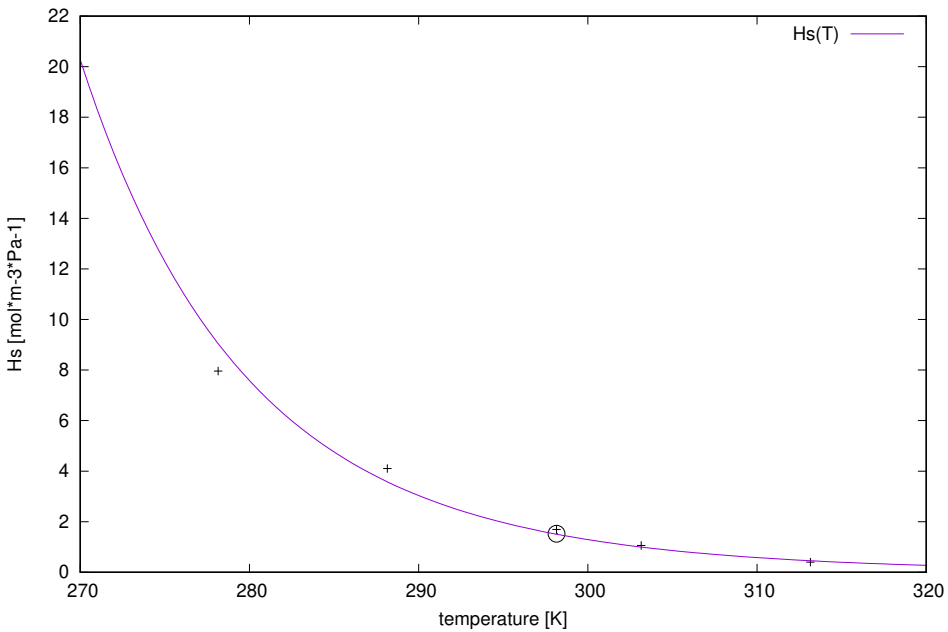

ref = 3683; chem = PBDE-94; casrn = 446254-61-1; r2 = 0.98734

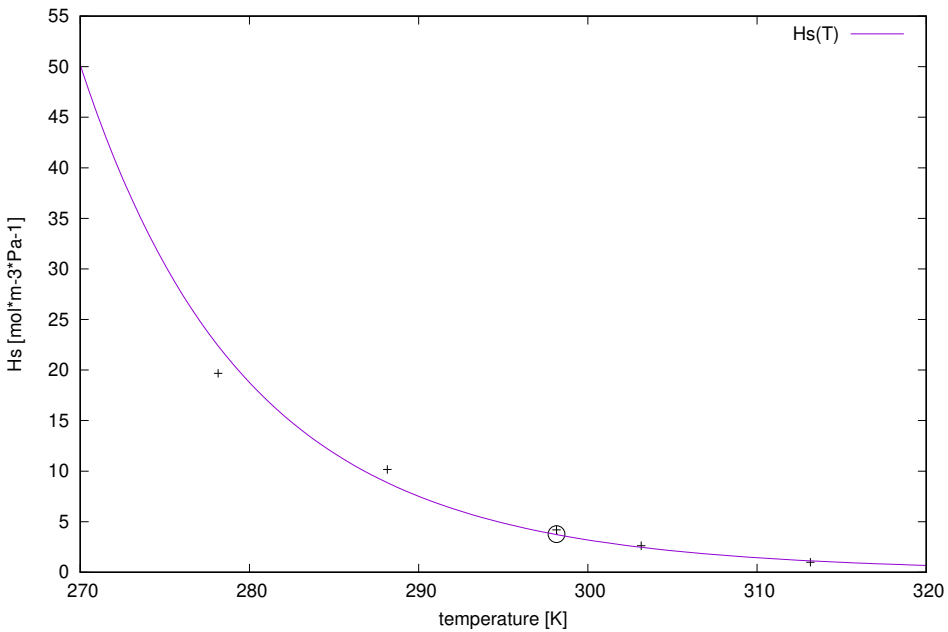

ref = 3683; chem = PBDE-95; casrn = 446254-62-2; r2 = 0.98734

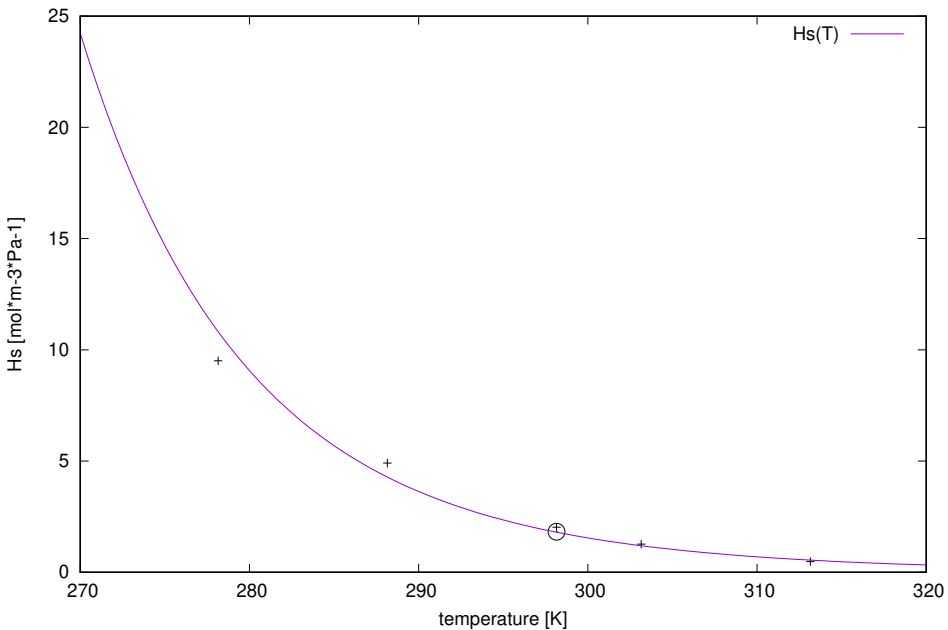

ref = 3683; chem = PBDE-96; casrn = 446254-63-3; r2 = 0.98734

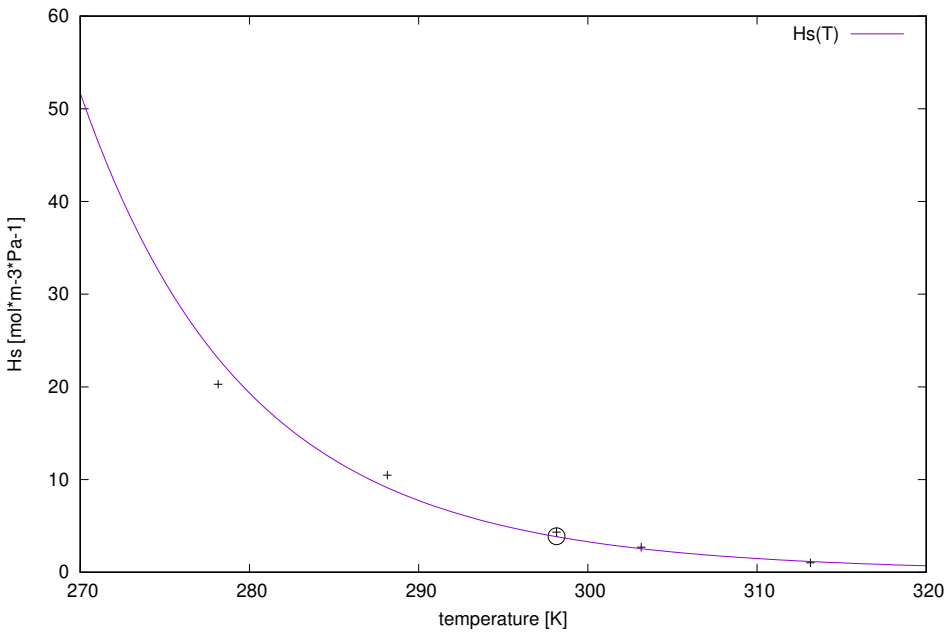

ref = 3683; chem = PBDE-97; casrn = 446254-64-4; r2 = 0.98734

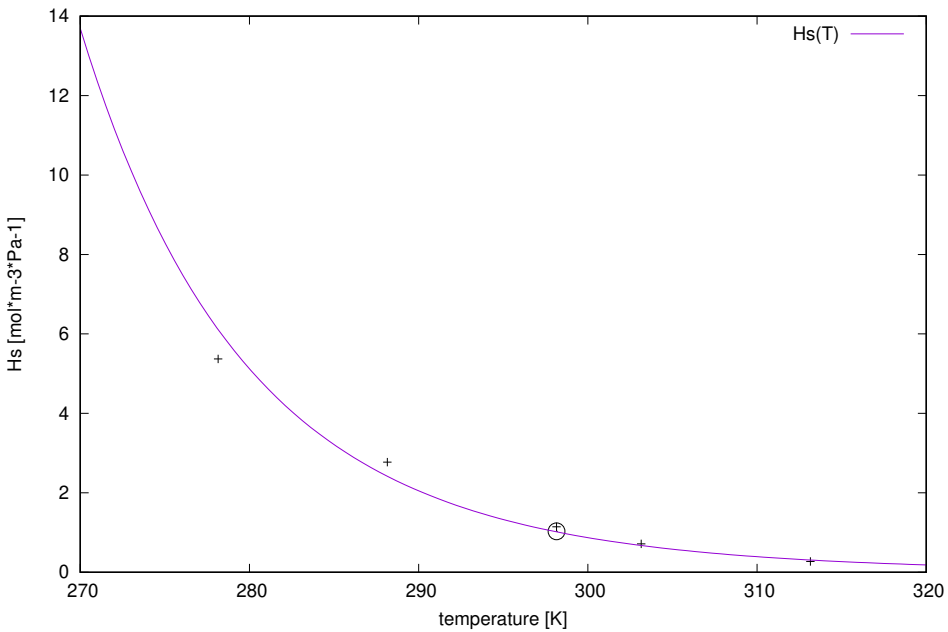



ref = 3683; chem = PBDE-101; casrn = 446254-65-5; r2 = 0.98734

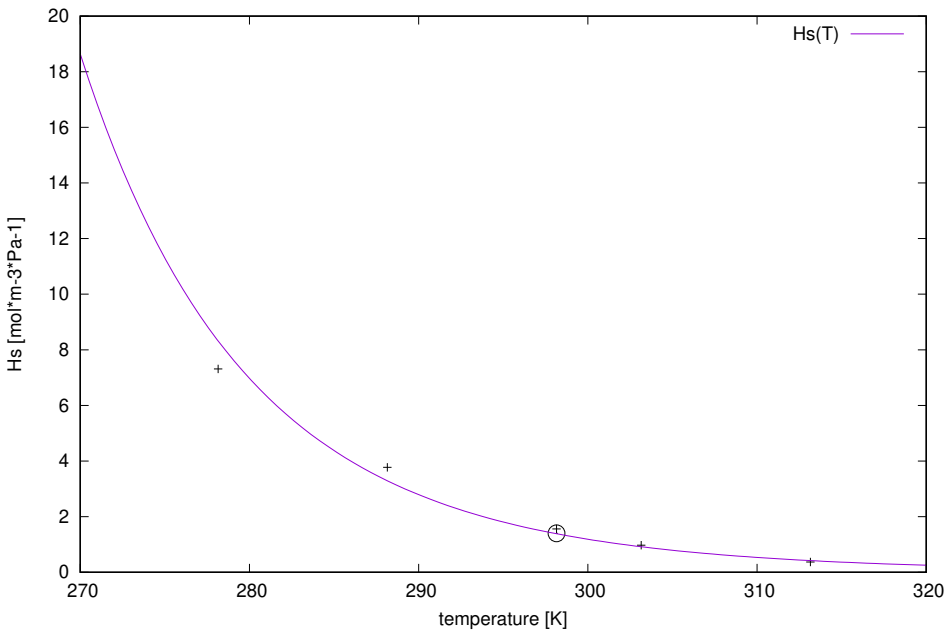

ref = 3683; chem = PBDE-102; casrn = 446254-66-6; r2 = 0.98738

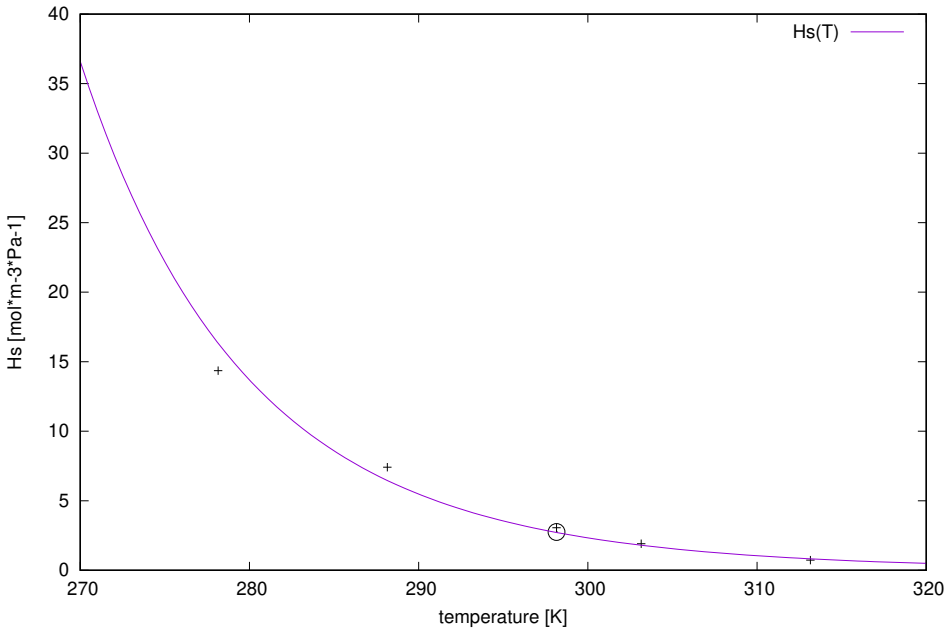

ref = 3683; chem = PBDE-103; casrn = 446254-67-7; r2 = 0.98747

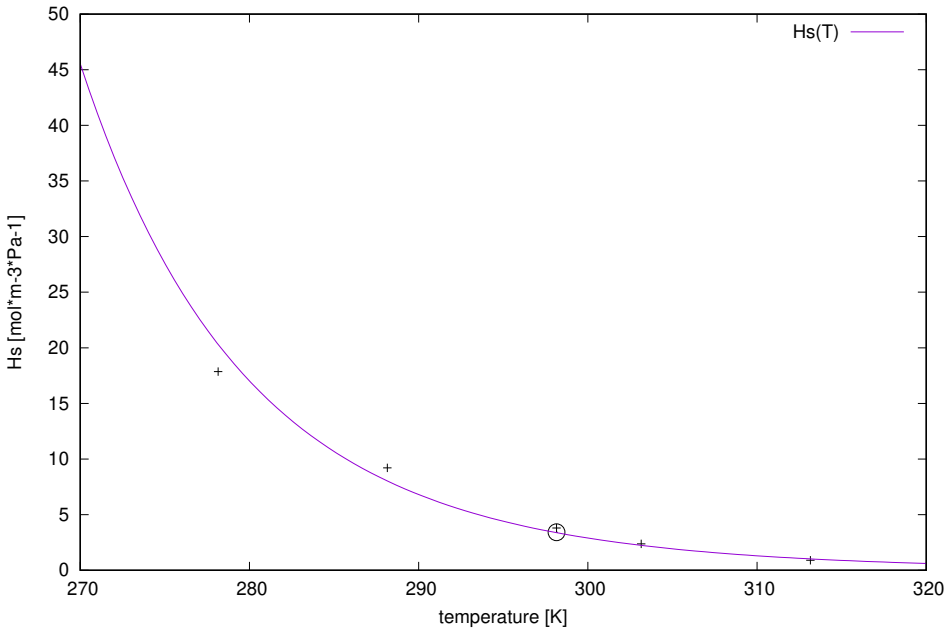

ref = 3683; chem = PBDE-104; casrn = 446254-68-8; r2 = 0.98734

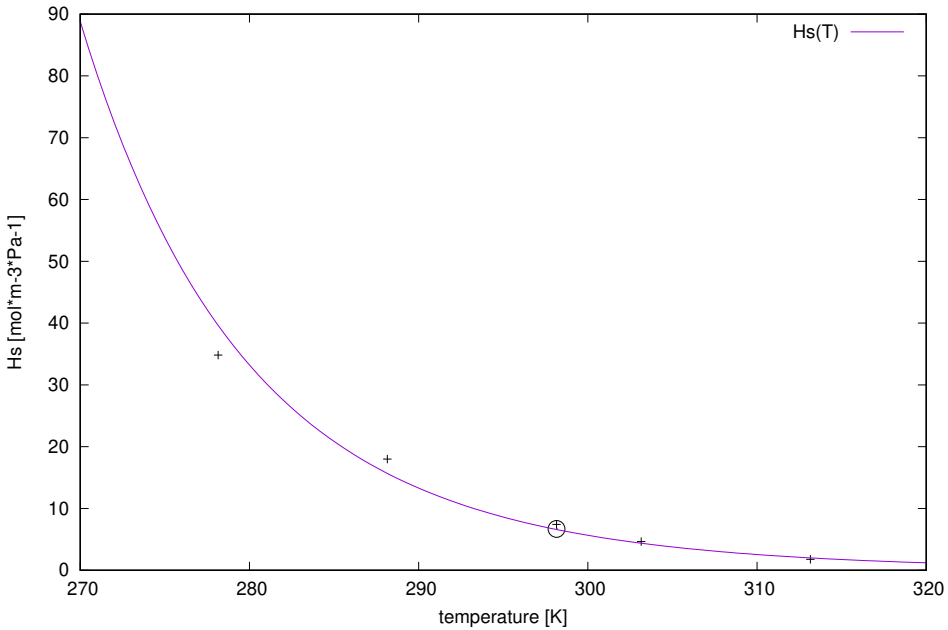

ref = 3683; chem = PBDE-106; casrn = 446254-69-9; r2 = 0.98734

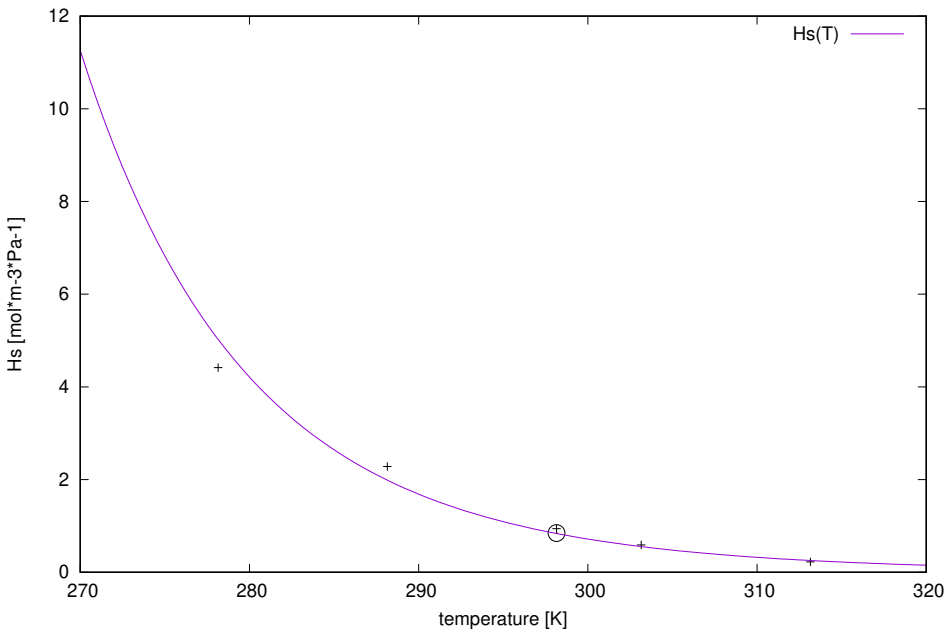

ref = 3683; chem = PBDE-107; casrn = 446254-70-2; r2 = 0.98734

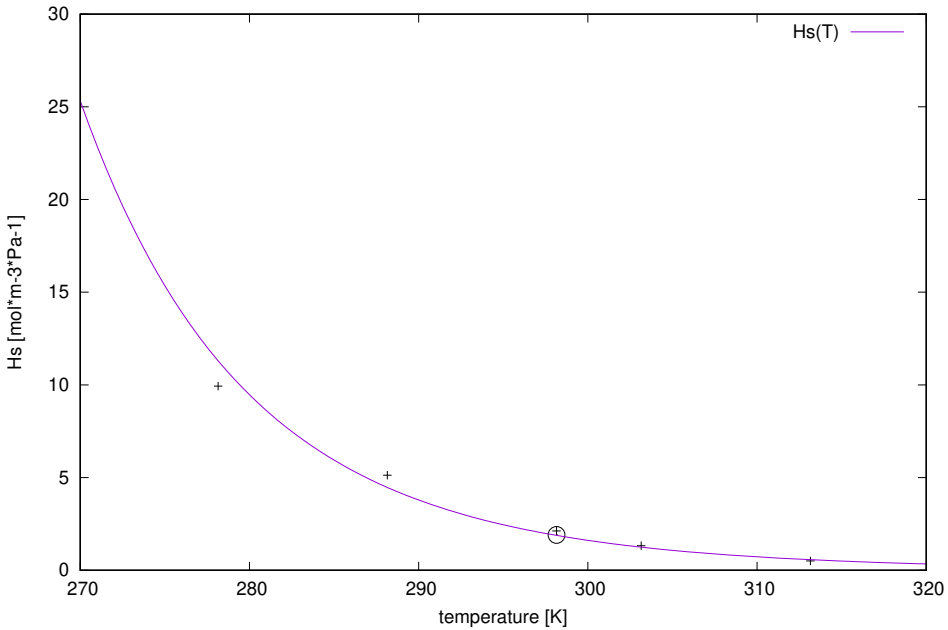

ref = 3683; chem = PBDE-108; casrn = 446254-71-3; r2 = 0.98757

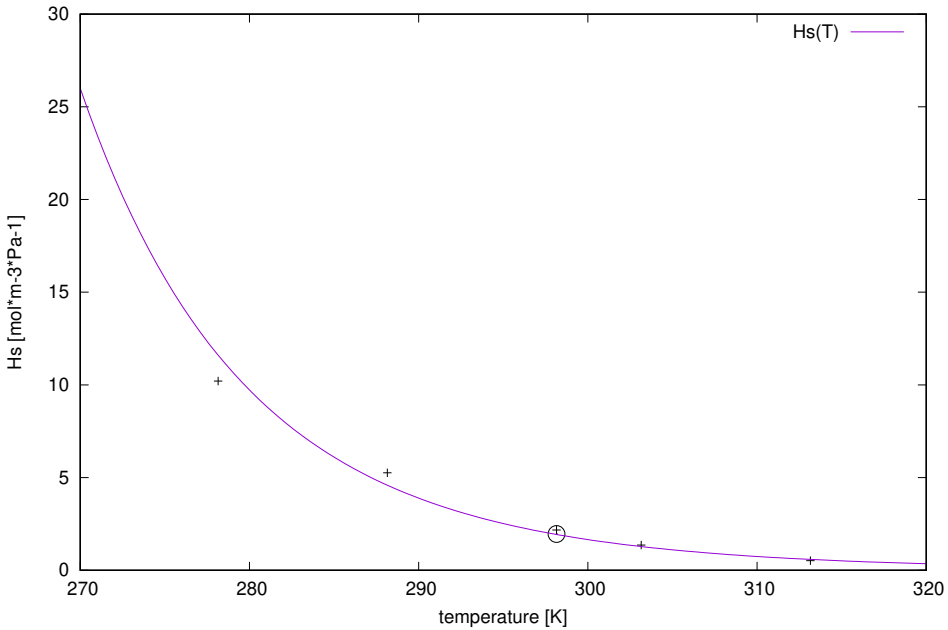

ref = 3683; chem = PBDE-109; casrn = 446254-72-4; r2 = 0.98734

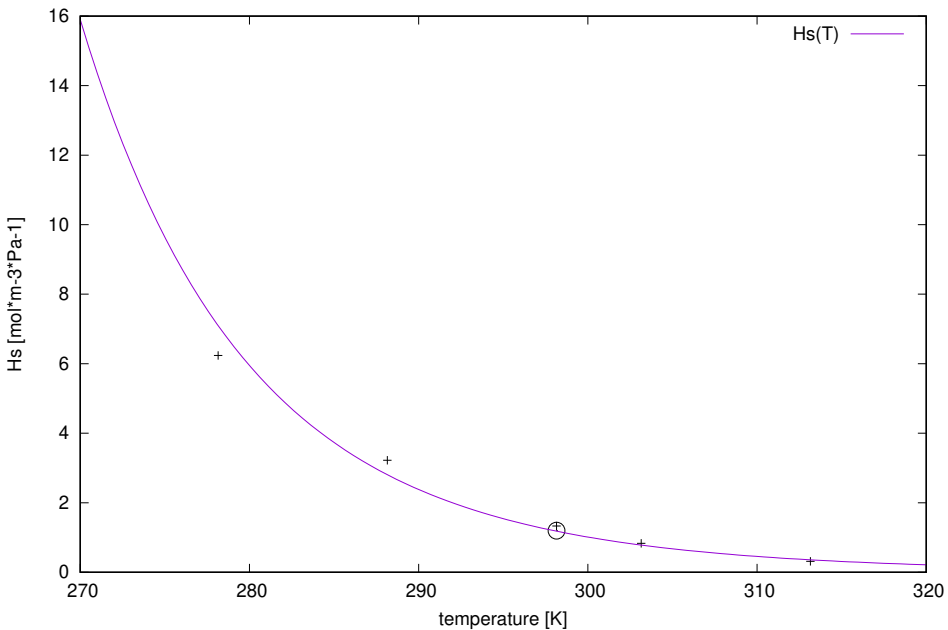



ref = 3683; chem = PBDE-110; casrn = 446254-73-5; r2 = 0.98734

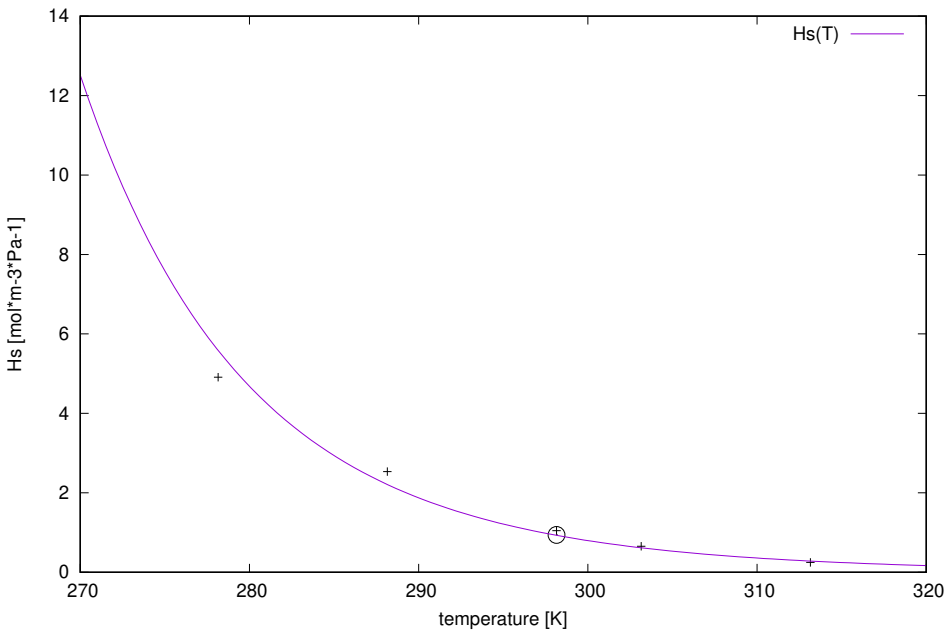

ref = 3683; chem = PBDE-111; casrn = 446254-74-6; r2 = 0.98734

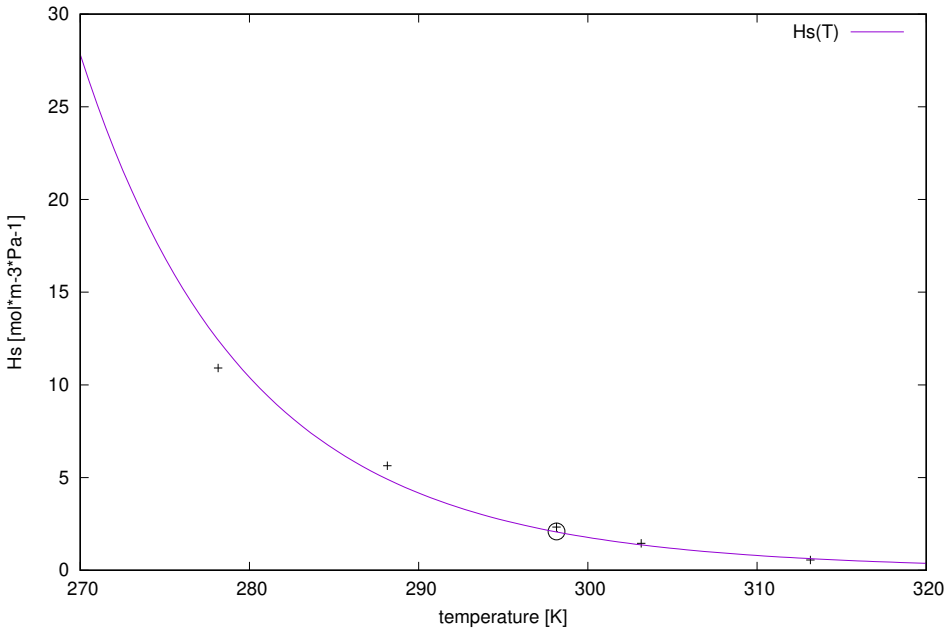

ref = 3683; chem = PBDE-112; casrn = 446254-75-7; r2 = 0.98747

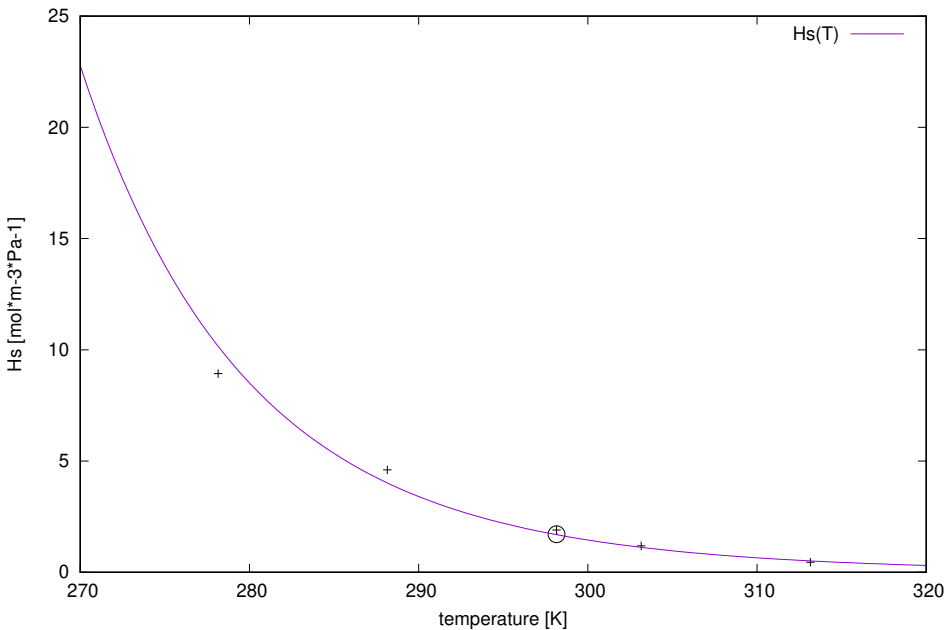

ref = 3683; chem = PBDE-113; casrn = 446254-76-8; r2 = 0.98734

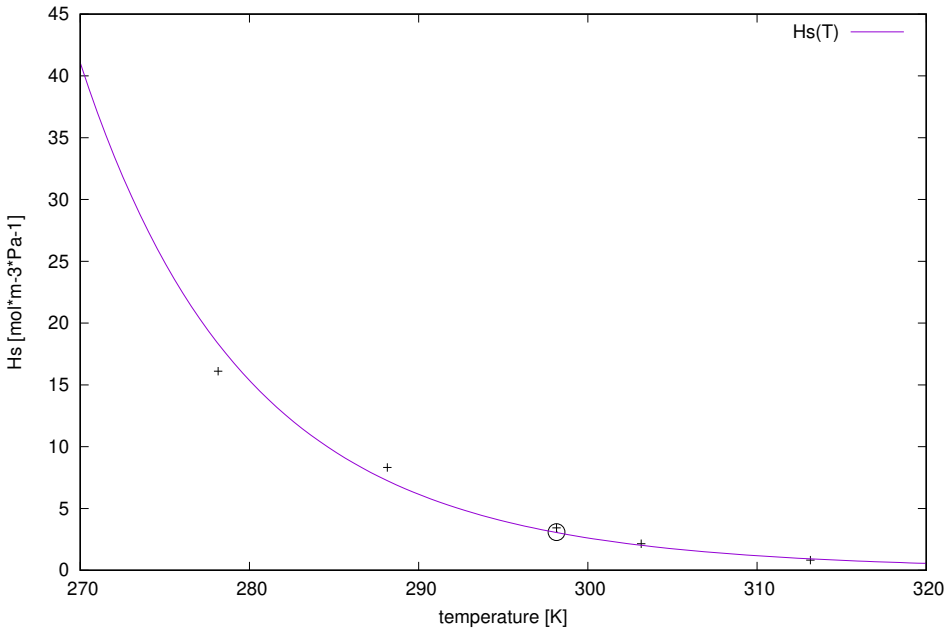

ref = 3683; chem = PBDE-114; casrn = 446254-77-9; r2 = 0.98734

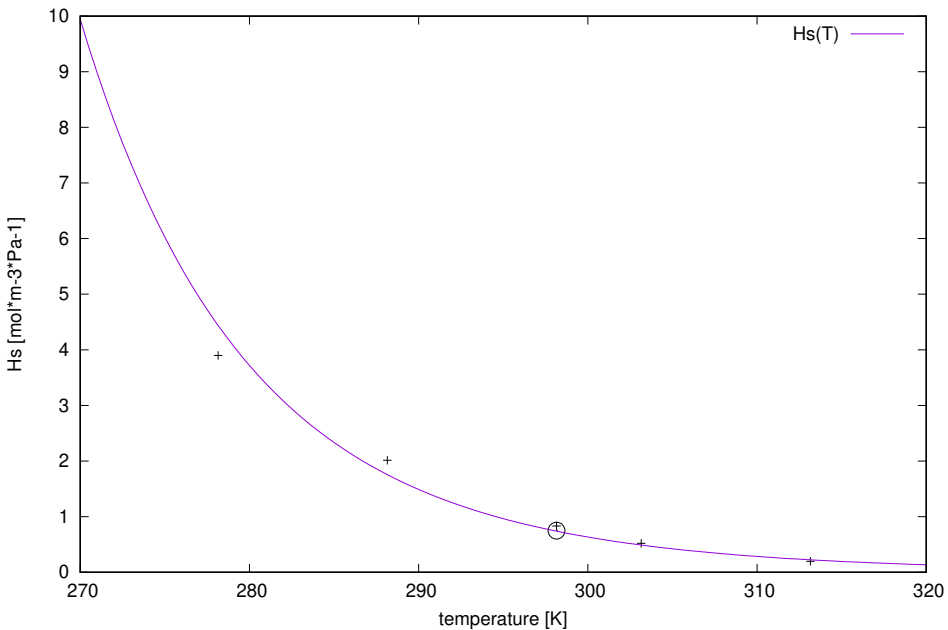

ref = 3683; chem = PBDE-115; casrn = 446254-78-0; r2 = 0.98734

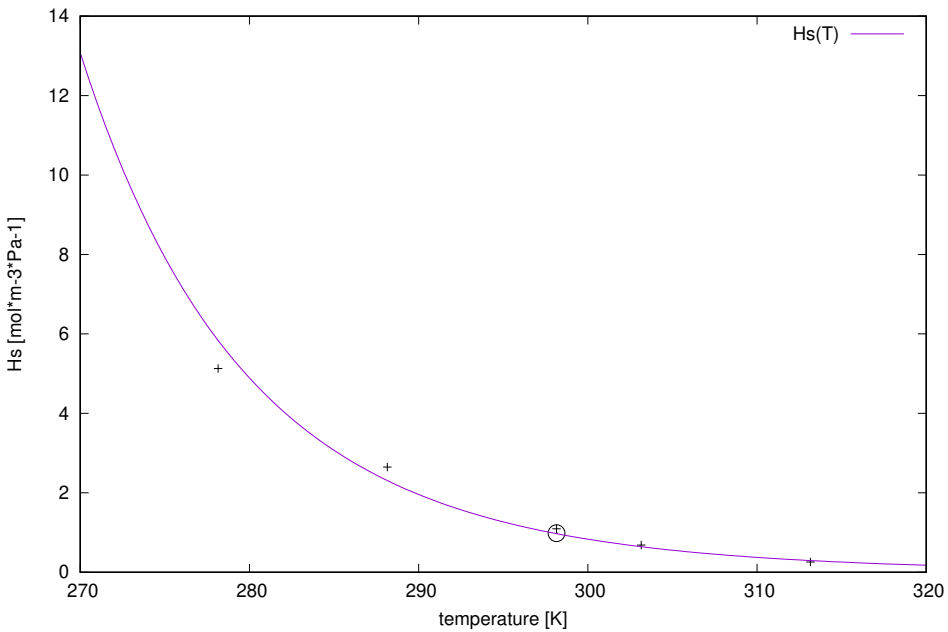

ref = 3683; chem = PBDE-117; casrn = 446254-79-1; r2 = 0.98738

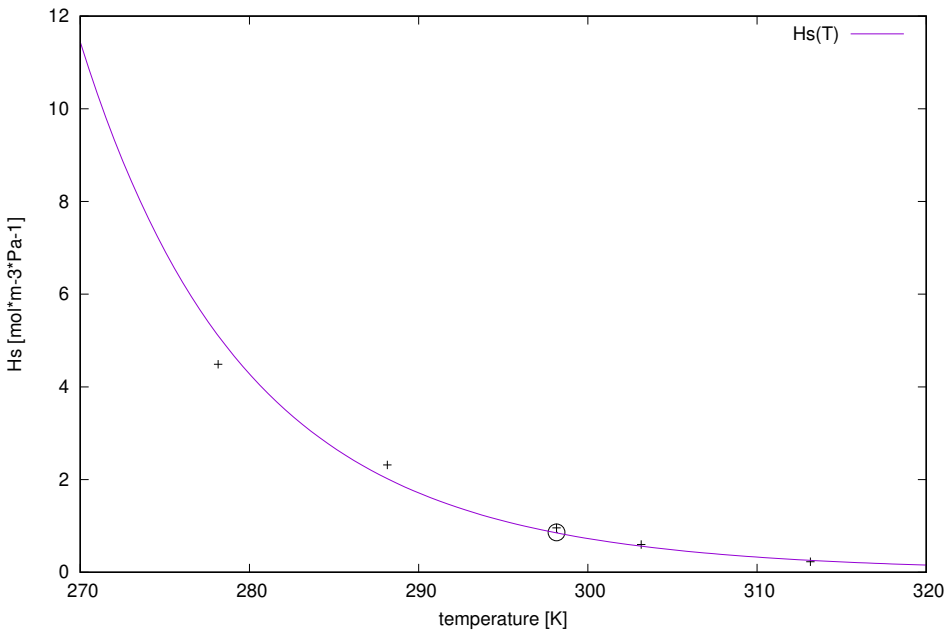

ref = 3683; chem = PBDE-118; casrn = 446254-80-4; r2 = 0.98734

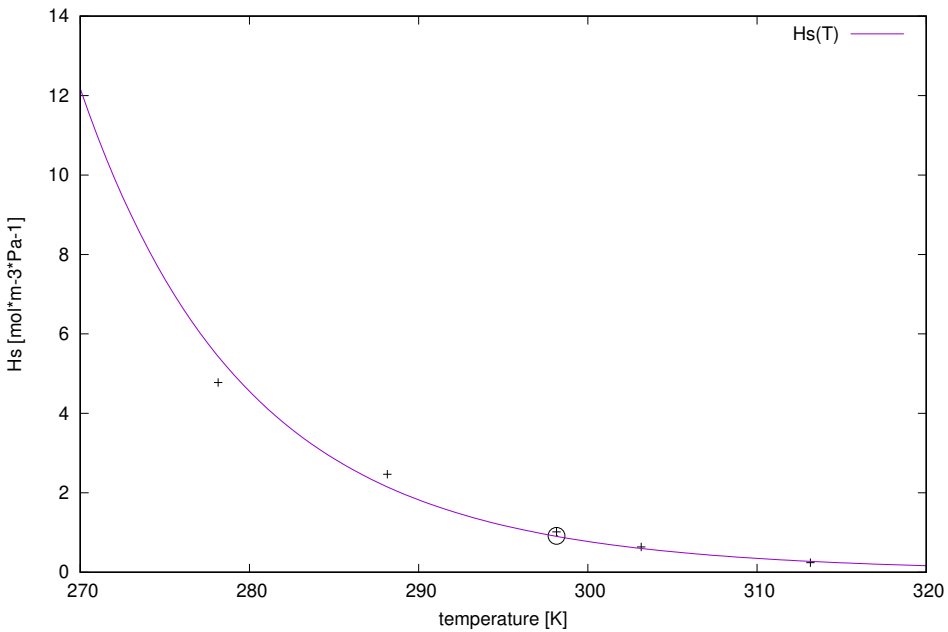



ref = 3683; chem = PBDE-121; casrn = 446254-81-5; r2 = 0.98734

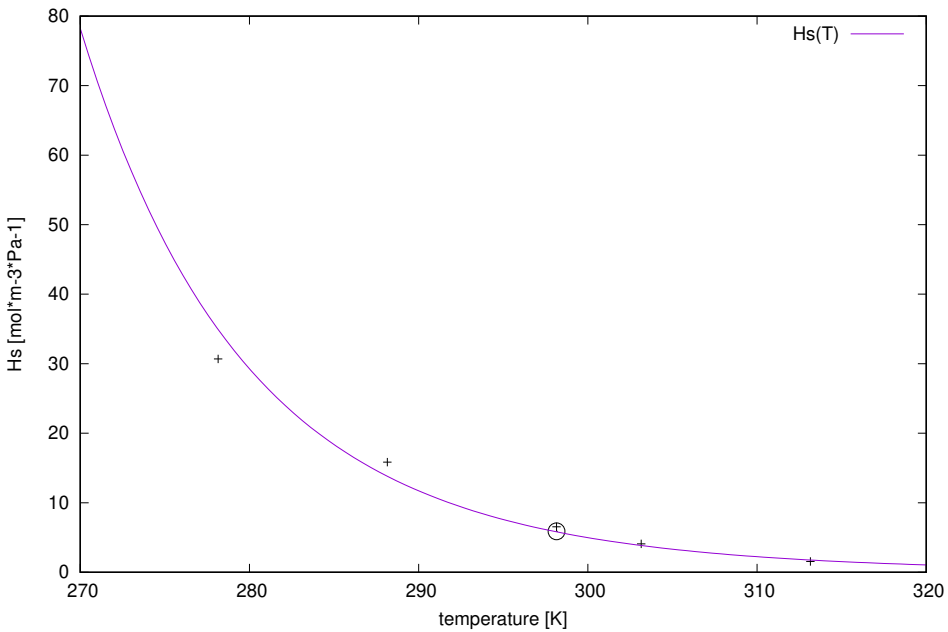

ref = 3683; chem = PBDE-122; casrn = 446254-82-6; r2 = 0.98734

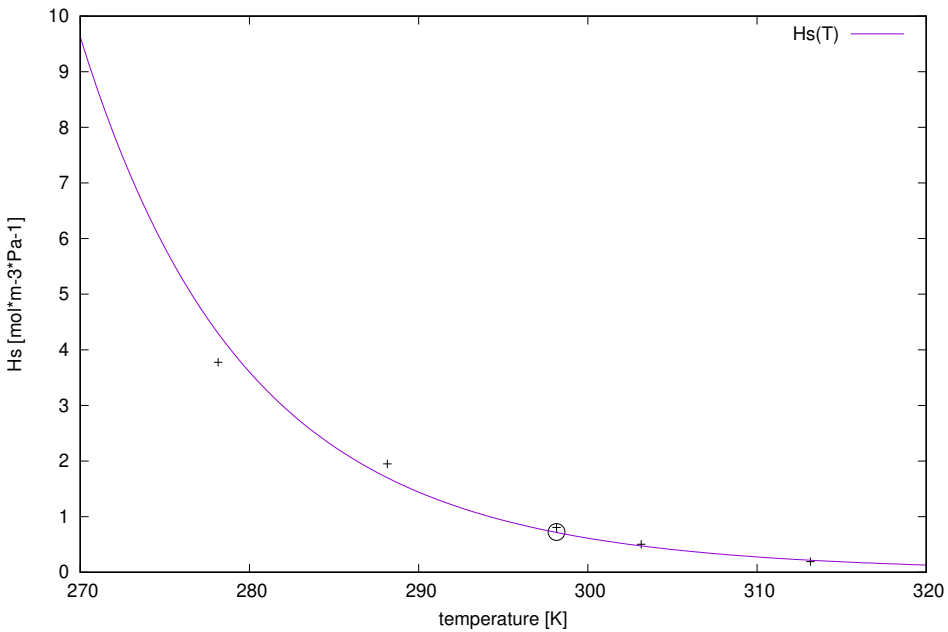

ref = 3683; chem = PBDE-123; casrn = 446254-83-7; r2 = 0.98757

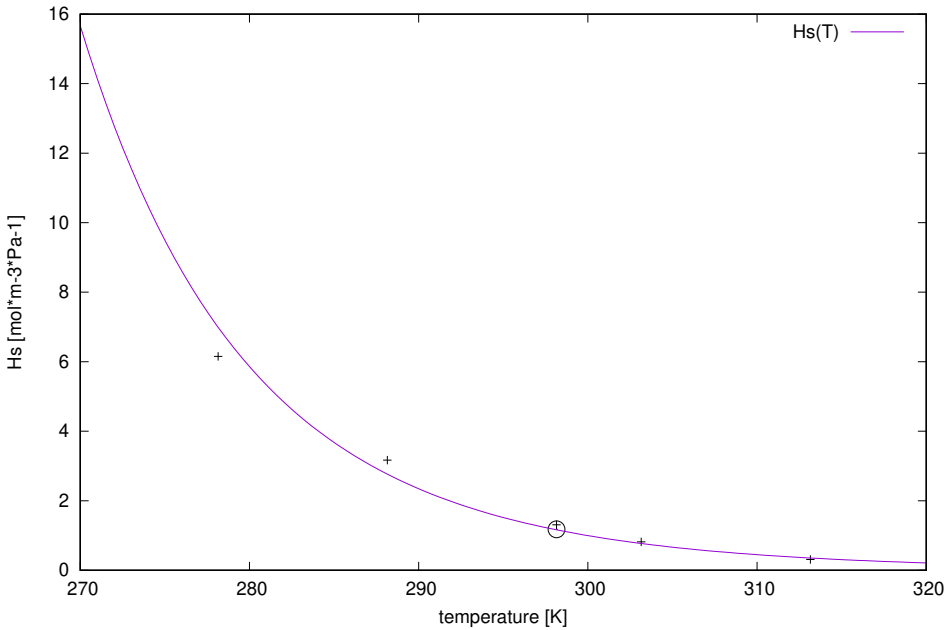

ref = 3683; chem = PBDE-124; casrn = 446254-84-8; r2 = 0.98734

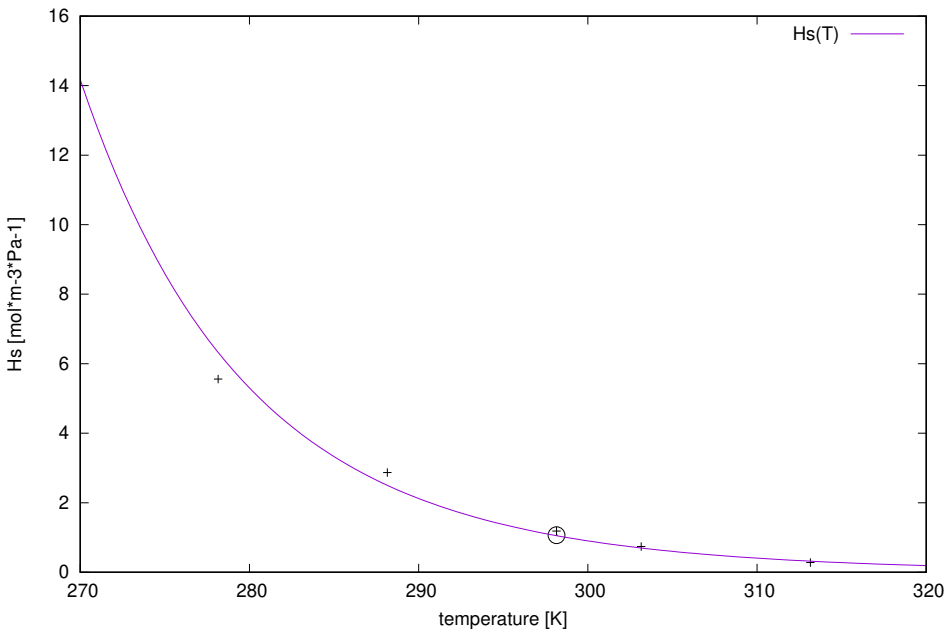

ref = 3683; chem = PBDE-125; casrn = 446254-85-9; r2 = 0.98747

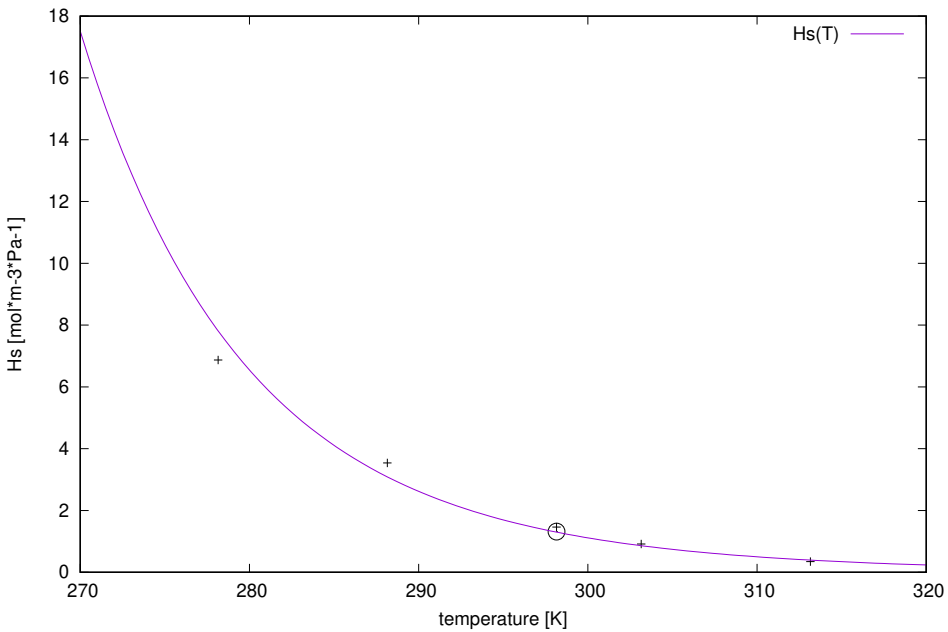

ref = 3683; chem = PBDE-127; casrn = 446254-86-0; r2 = 0.98734

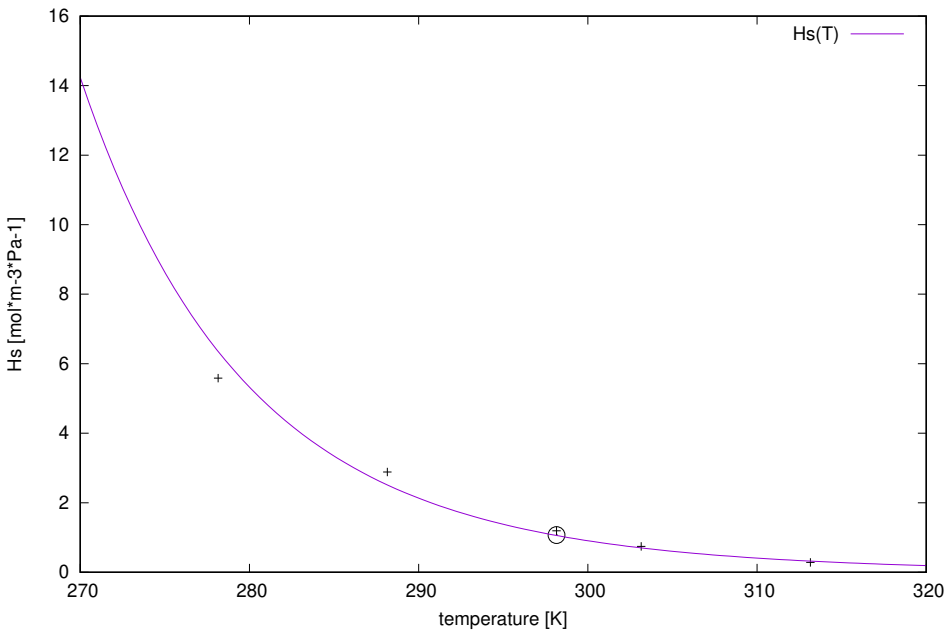

ref = 3683; chem = PBDE-129; casrn = 446254-87-1; r2 = 0.98748

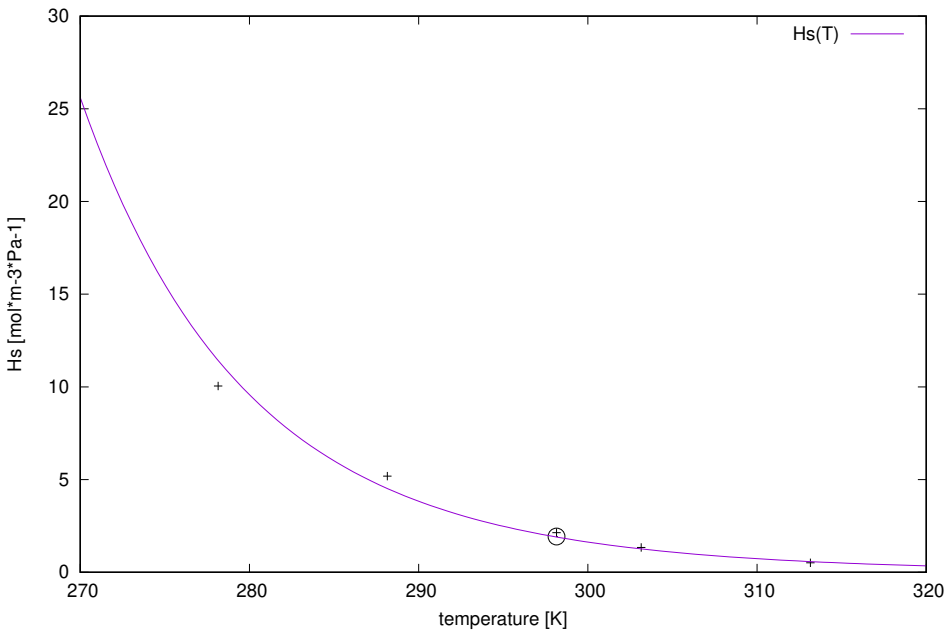

ref = 3683; chem = PBDE-130; casrn = 446254-88-2; r2 = 0.98757

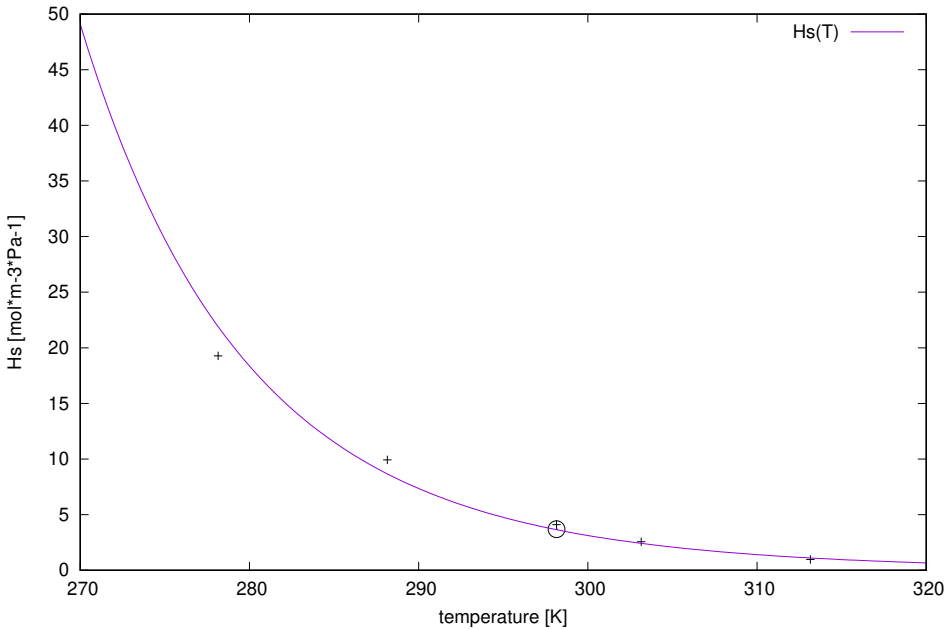



ref = 3683; chem = PBDE-131; casrn = 446254-89-3; r2 = 0.98734

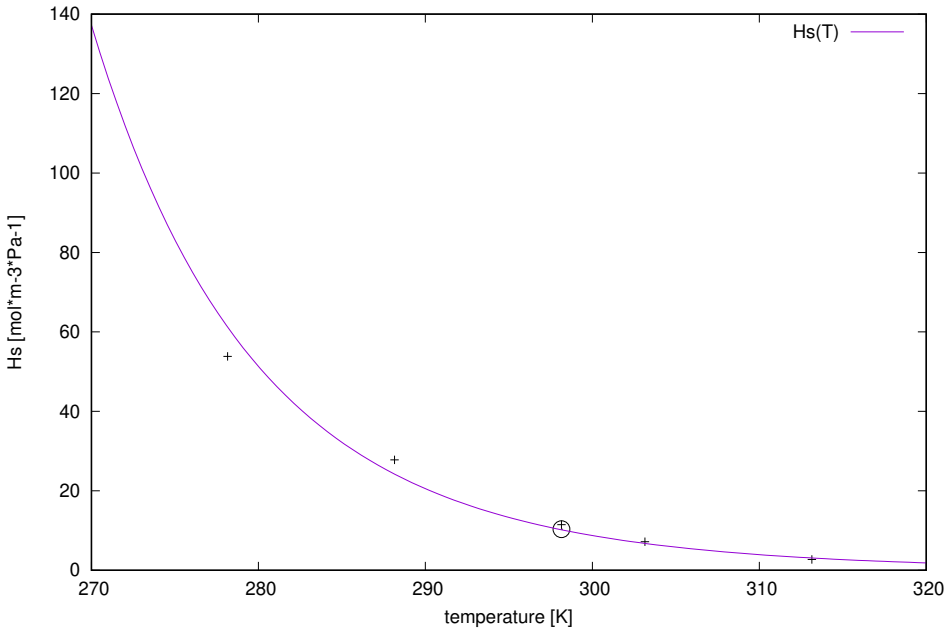

ref = 3683; chem = PBDE-132; casrn = 446254-90-6; r2 = 0.98734

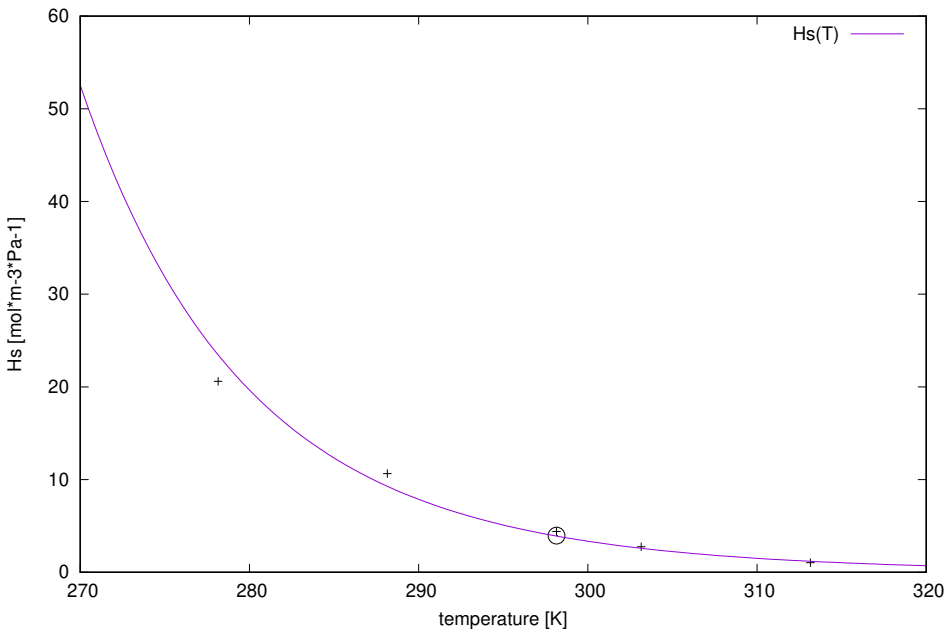

ref = 3683; chem = PBDE-133; casrn = 446254-91-7; r2 = 0.98738

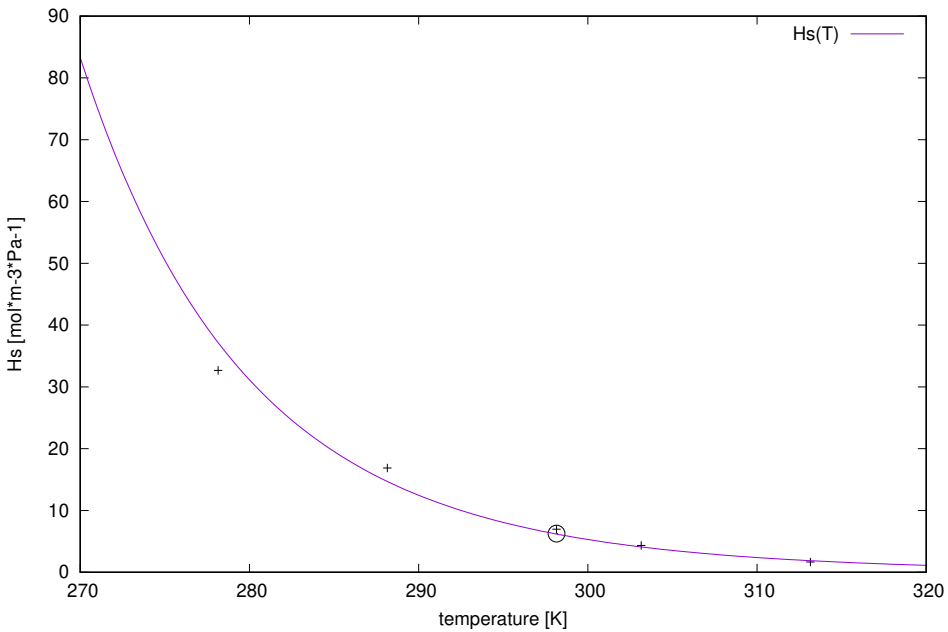

ref = 3683; chem = PBDE-134; casrn = 446254-92-8; r2 = 0.98734

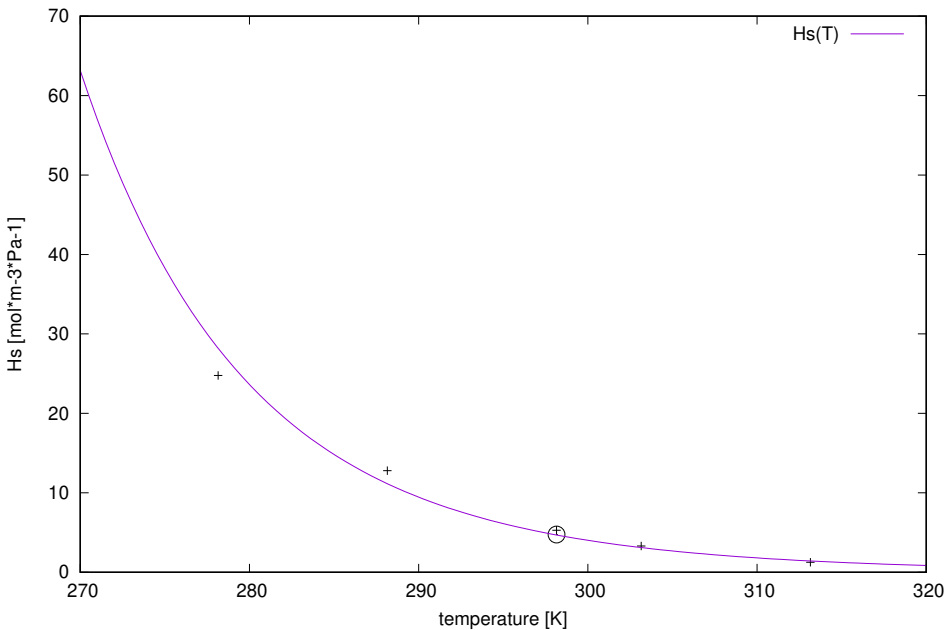

ref = 3683; chem = PBDE-135; casrn = 446254-93-9; r2 = 0.98757

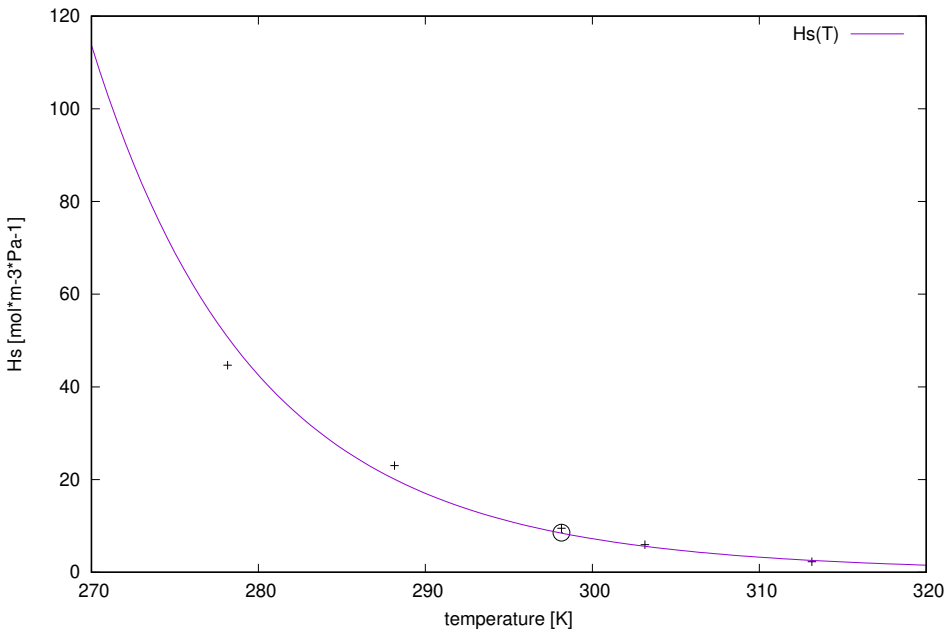

ref = 3683; chem = PBDE-136; casrn = 446254-94-0; r2 = 0.98734

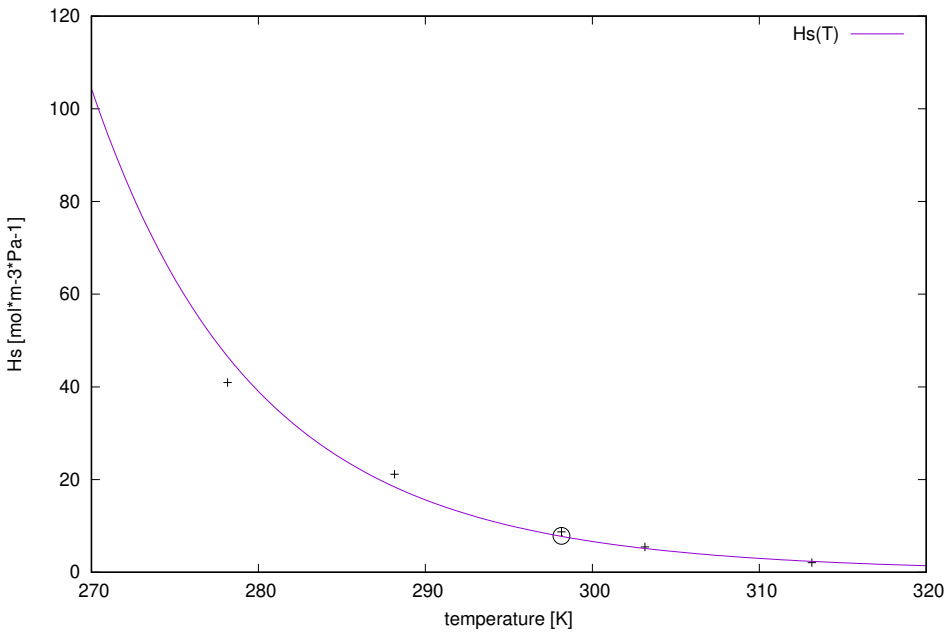

ref = 3683; chem = PBDE-137; casrn = 446254-95-1; r2 = 0.98734

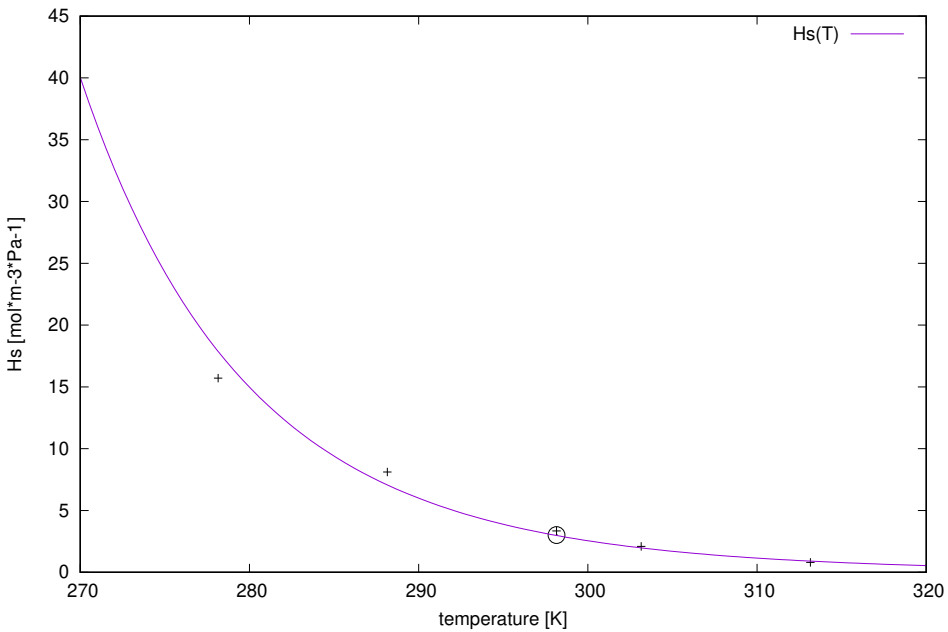

ref = 3683; chem = PBDE-141; casrn = 446254-97-3; r2 = 0.98734

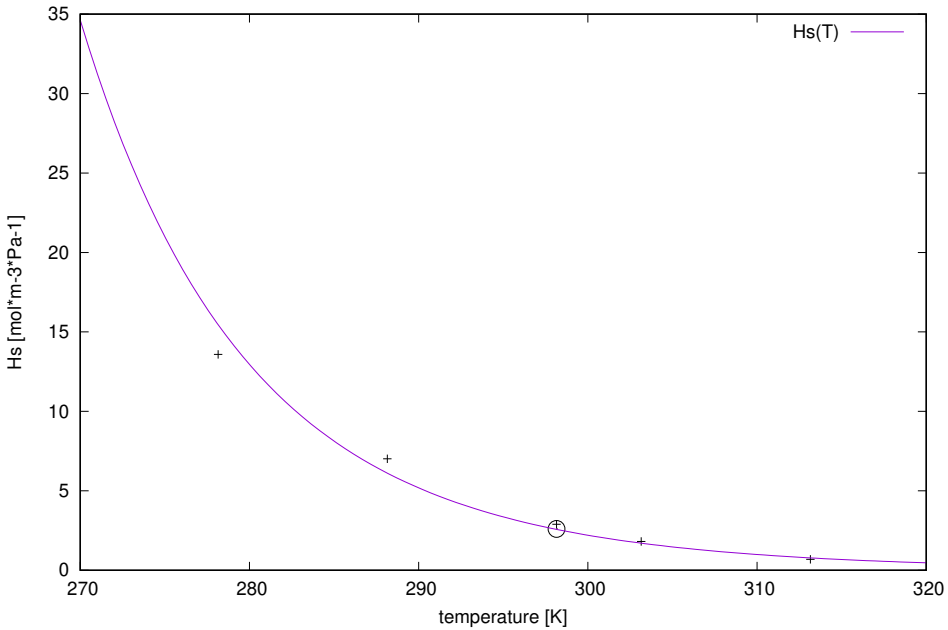



ref = 3683; chem = PBDE-142; casrn = 446254-98-4; r2 = 0.98734

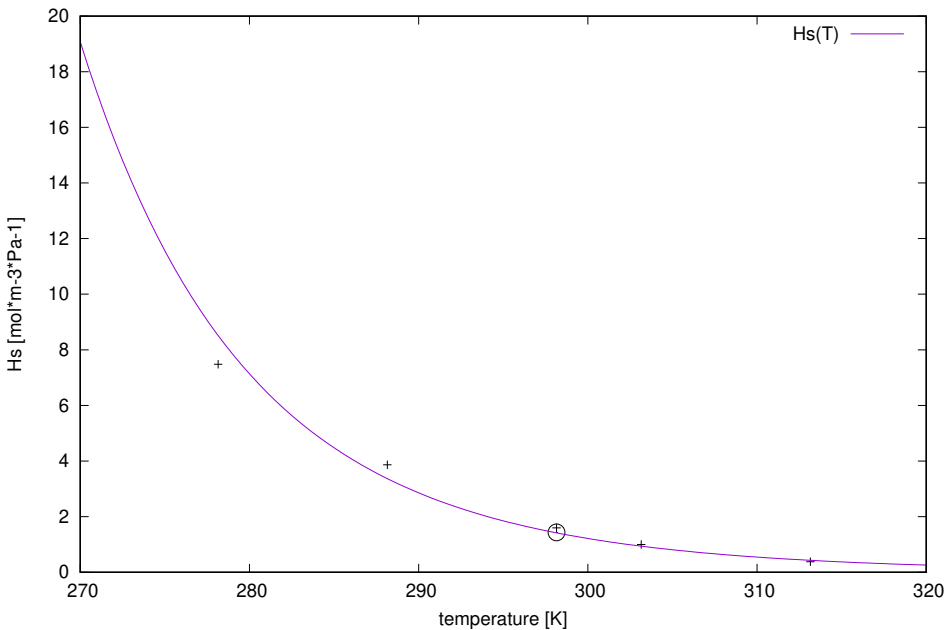

ref = 3683; chem = PBDE-143; casrn = 446254-99-5; r2 = 0.98734

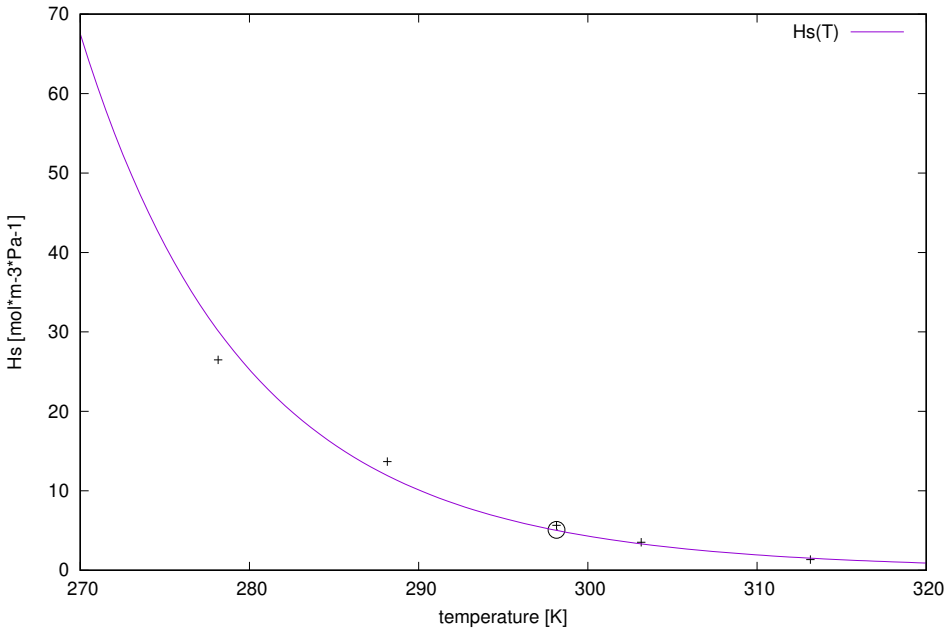

ref = 3683; chem = PBDE-144; casrn = 446255-00-1; r2 = 0.98734

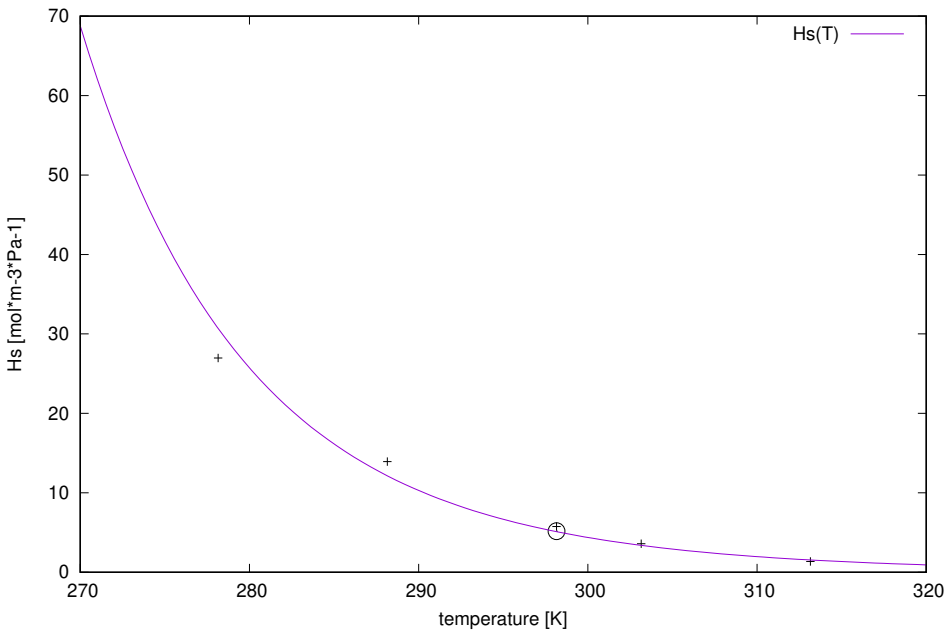

ref = 3683; chem = PBDE-145; casrn = 446255-01-2; r2 = 0.98738

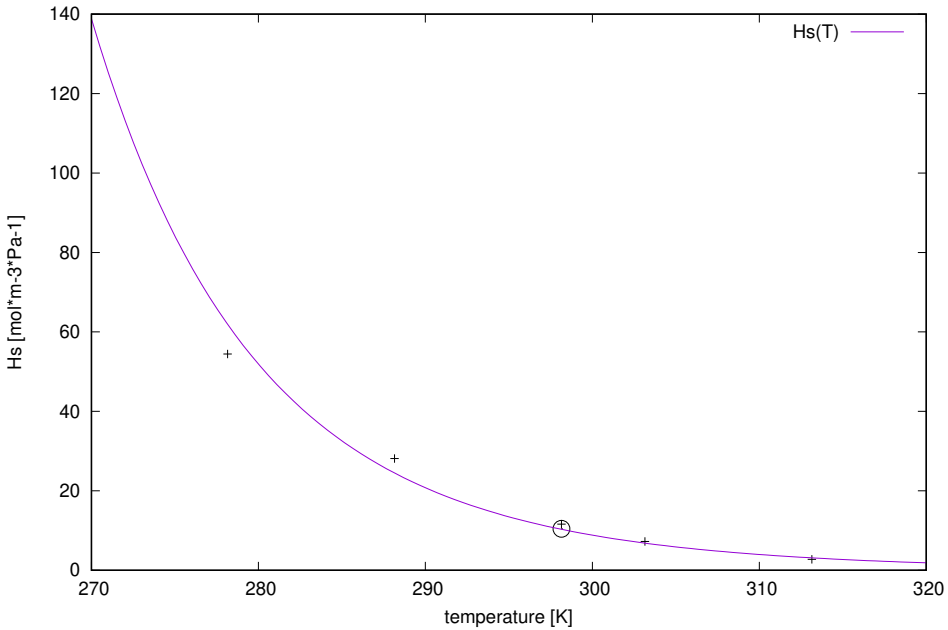

ref = 3683; chem = PBDE-146; casrn = 446255-02-3; r2 = 0.98747

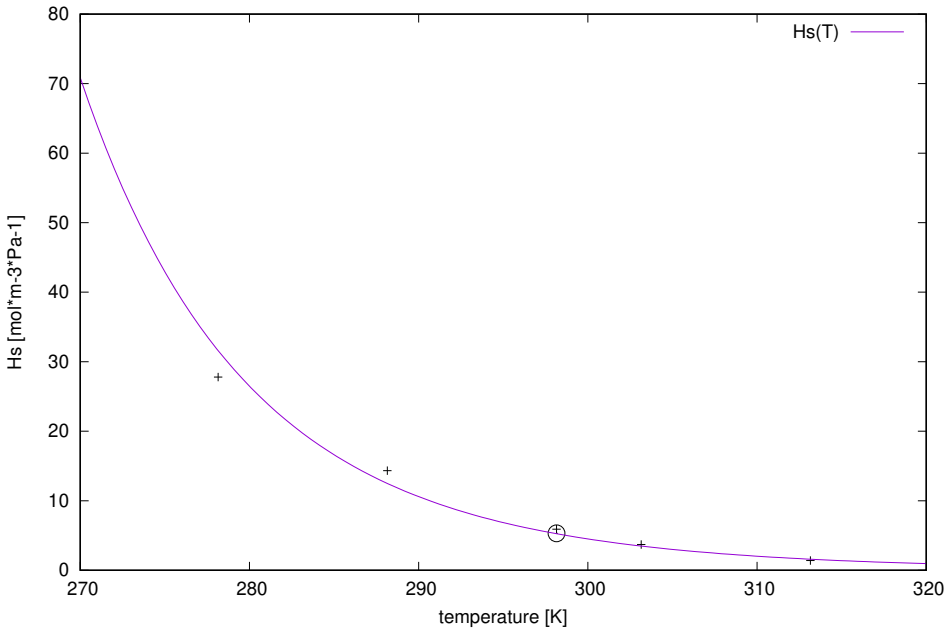

ref = 3683; chem = PBDE-148; casrn = 446255-03-4; r2 = 0.98734

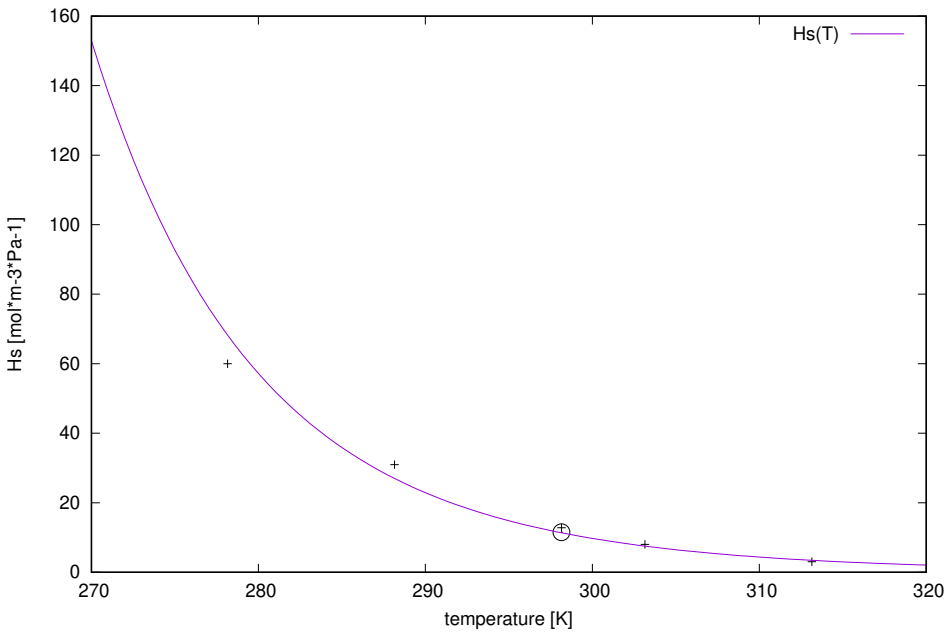

ref = 3683; chem = PBDE-149; casrn = 446255-04-5; r2 = 0.98748

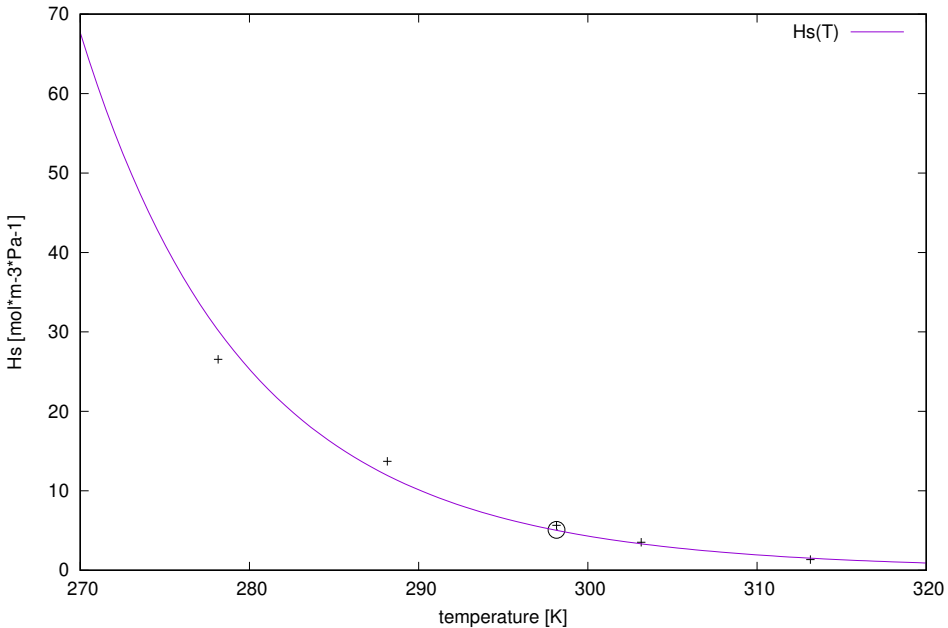

ref = 3683; chem = PBDE-150; casrn = 446255-05-6; r2 = 0.98734

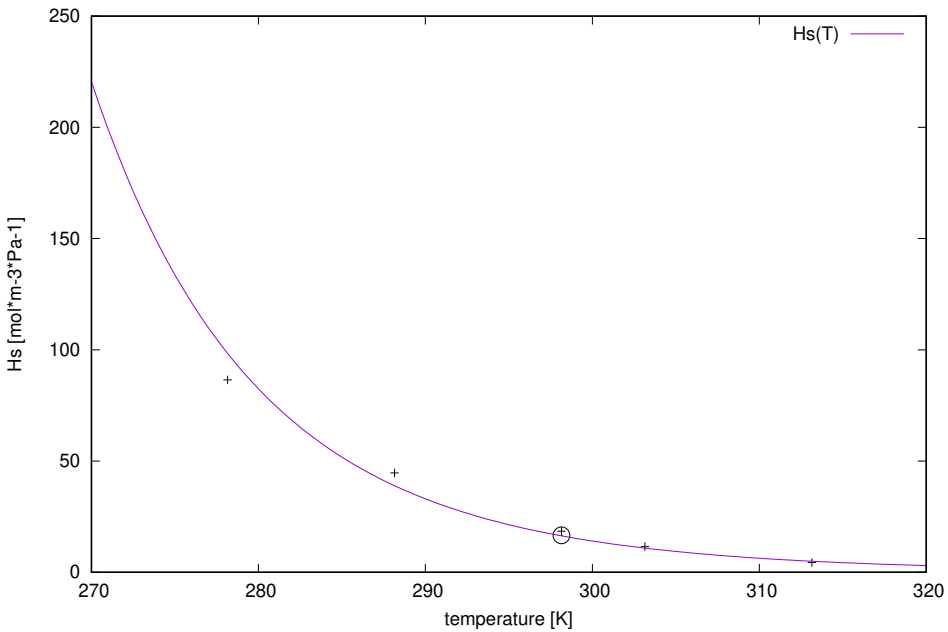



ref = 3683; chem = PBDE-151; casrn = 446255-06-7; r2 = 0.98757

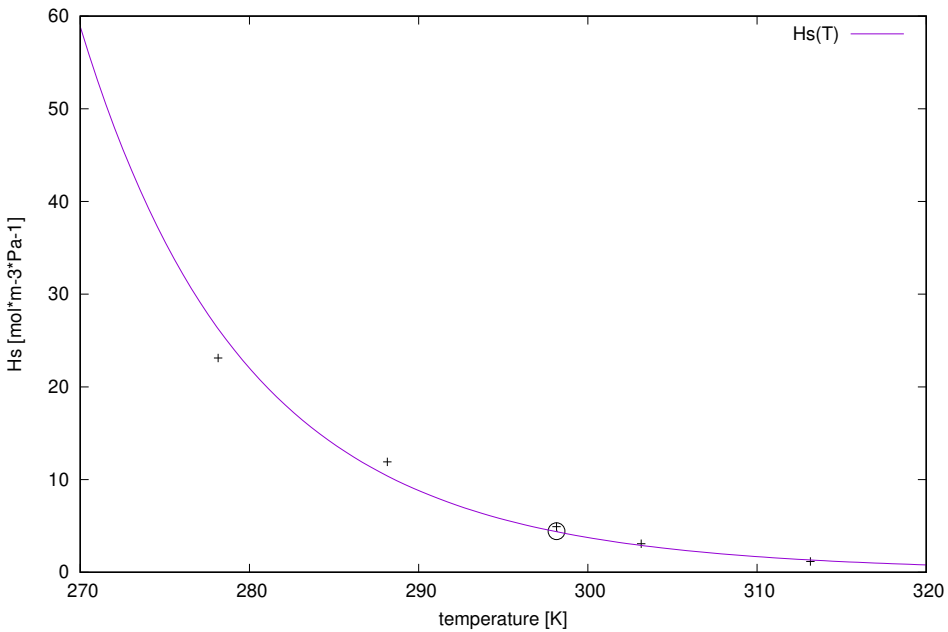

ref = 3683; chem = PBDE-152; casrn = 446255-07-8; r2 = 0.98734

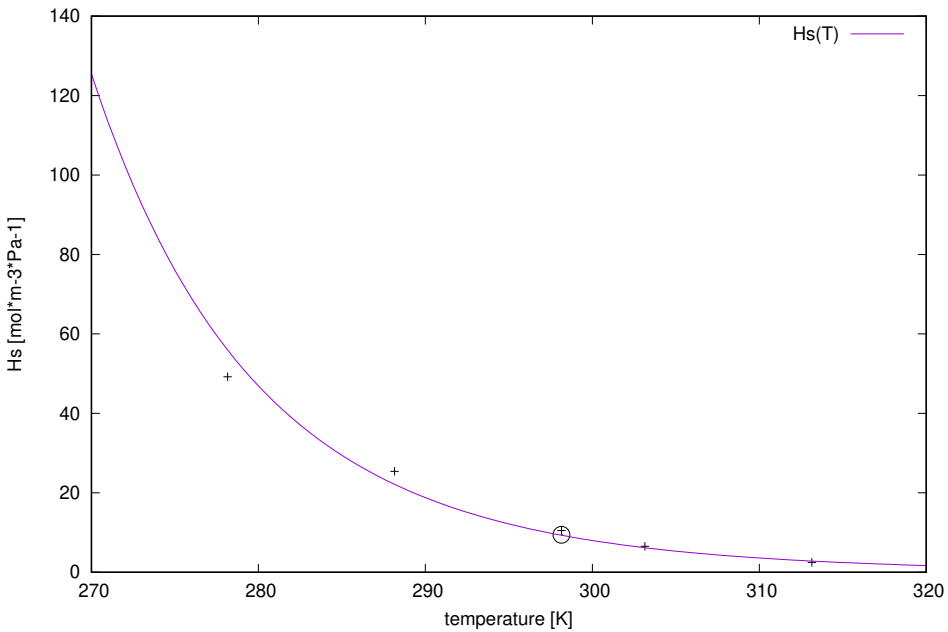

ref = 3683; chem = PBDE-157; casrn = 446255-08-9; r2 = 0.98734

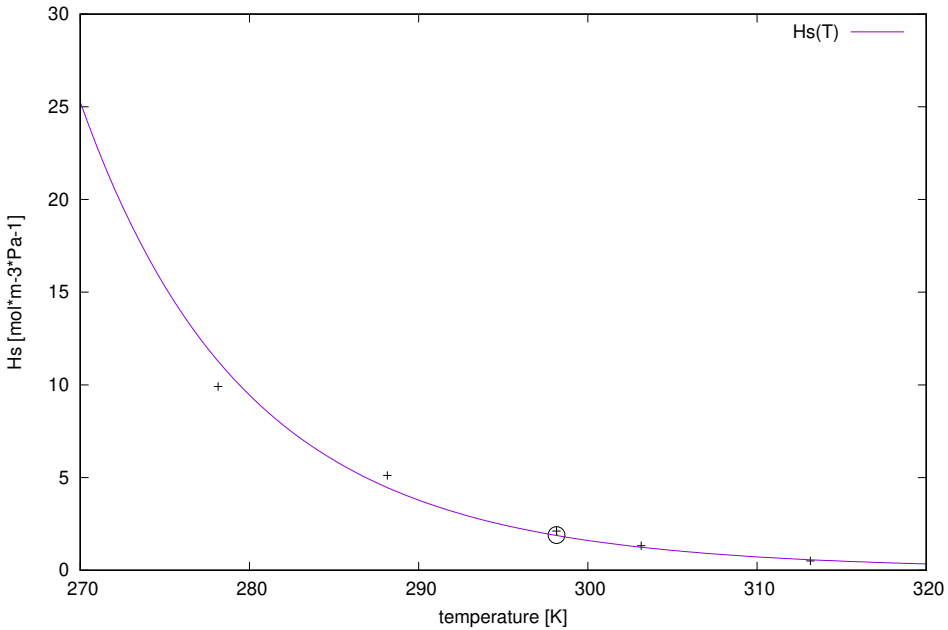

ref = 3683; chem = PBDE-158; casrn = 446255-09-0; r2 = 0.98734

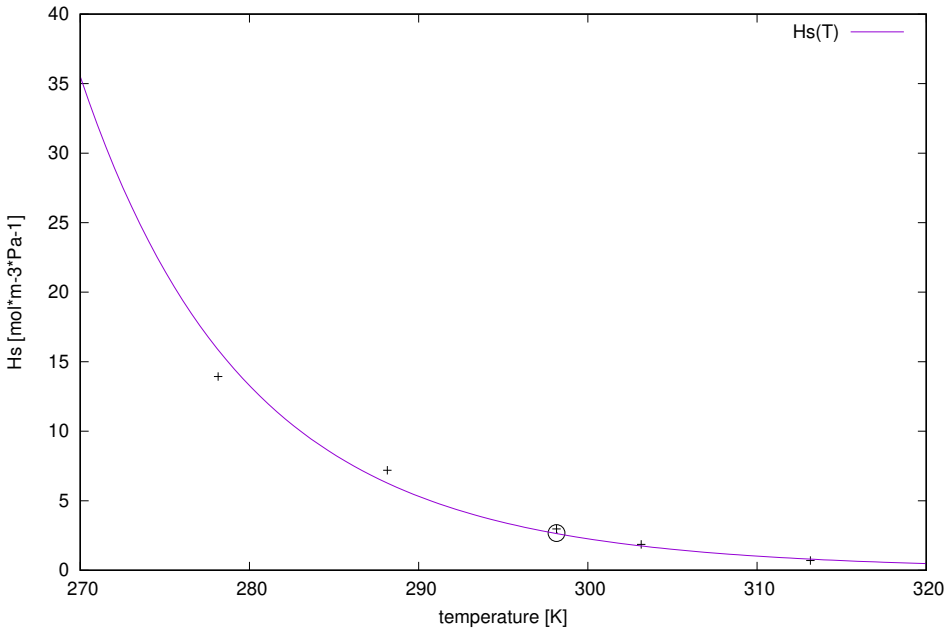

ref = 3683; chem = PBDE-159; casrn = 446255-10-3; r2 = 0.98757

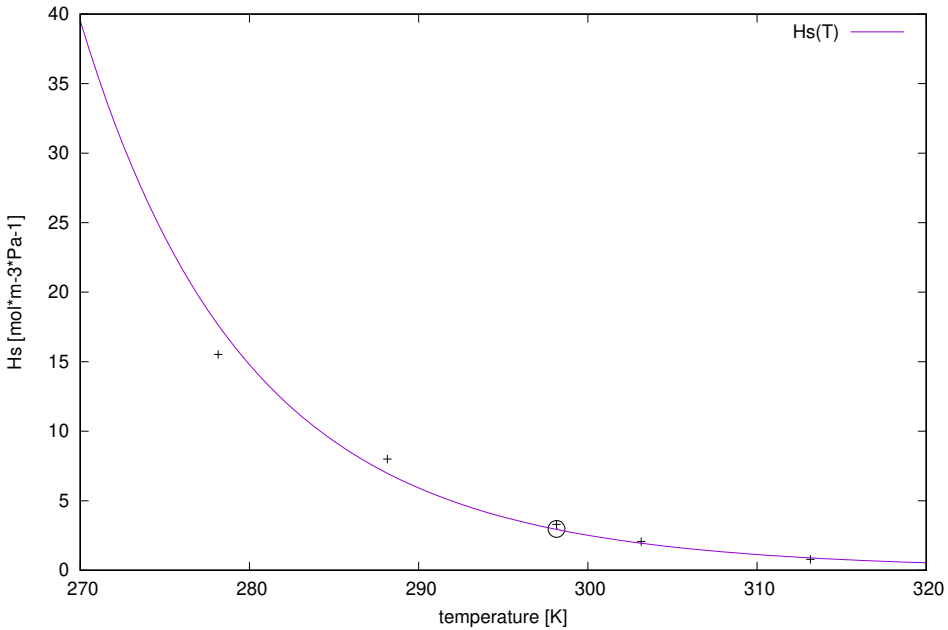

ref = 3683; chem = PBDE-160; casrn = 446255-11-4; r2 = 0.98734

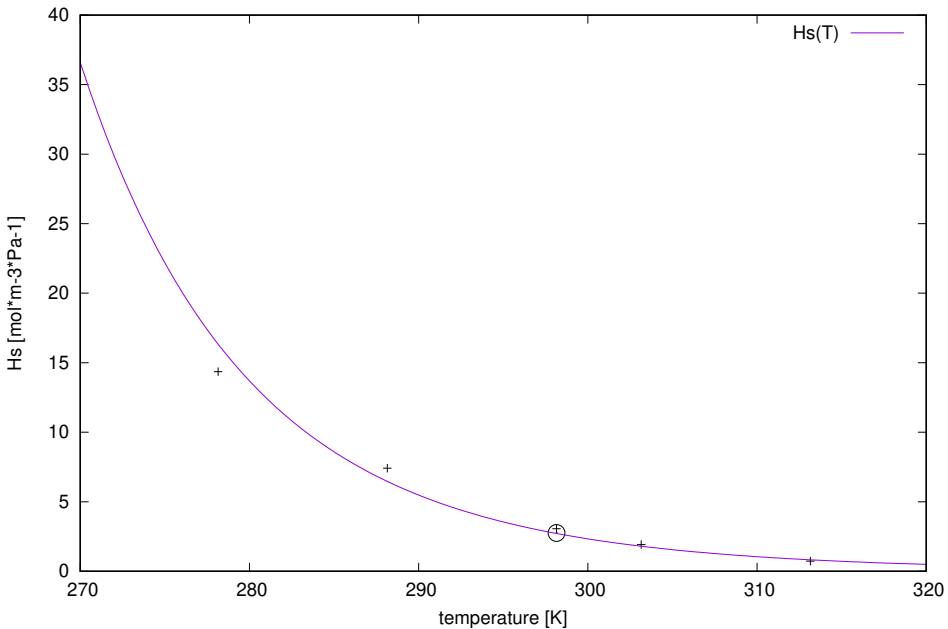

ref = 3683; chem = PBDE-161; casrn = 446255-12-5; r2 = 0.98738

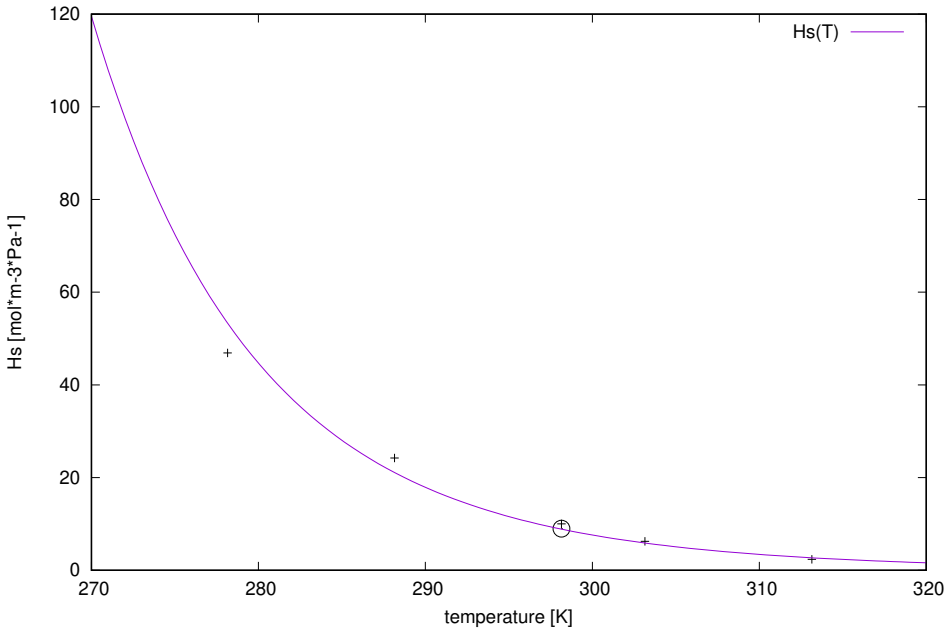

ref = 3683; chem = PBDE-162; casrn = 446255-13-6; r2 = 0.98734

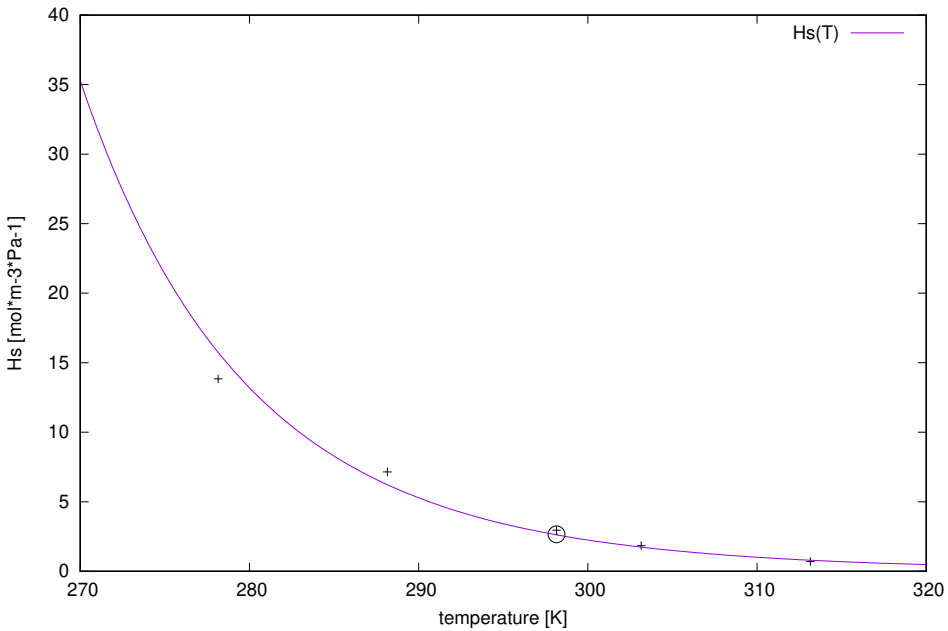



ref = 3683; chem = PBDE-163; casrn = 446255-14-7; r2 = 0.98734

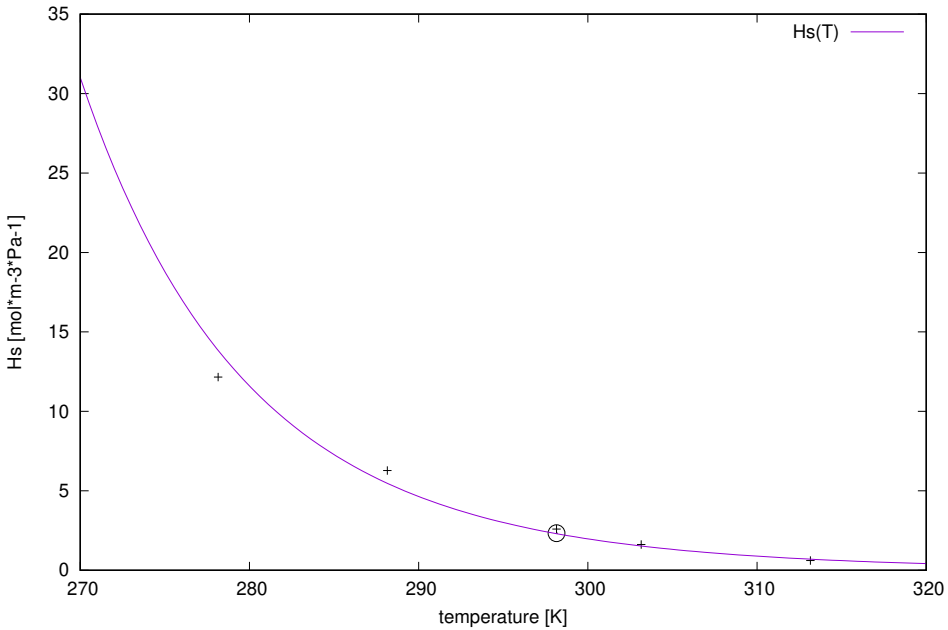

ref = 3683; chem = PBDE-164; casrn = 446255-15-8; r2 = 0.98734

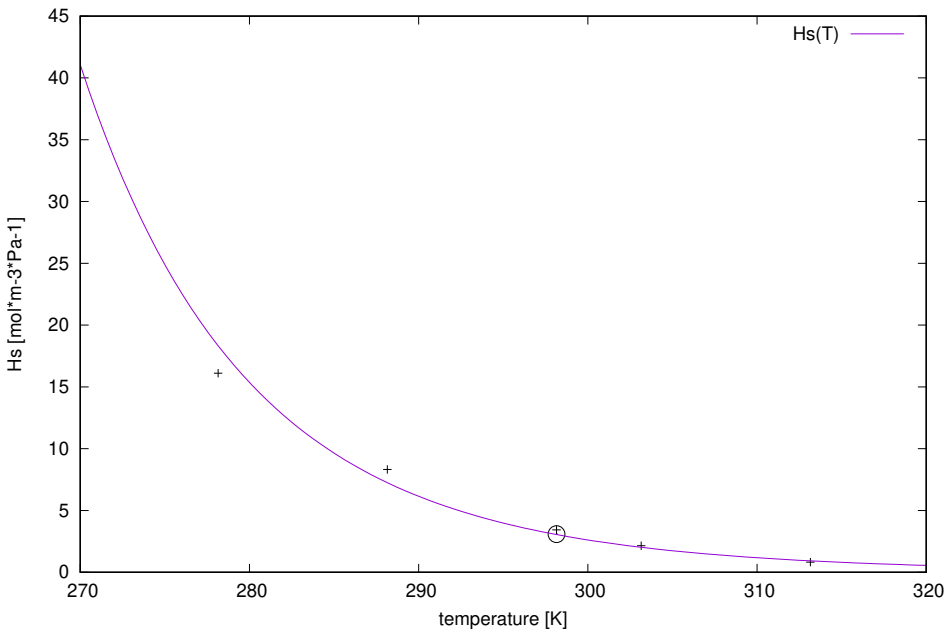

ref = 3683; chem = PBDE-165; casrn = 446255-16-9; r2 = 0.98747

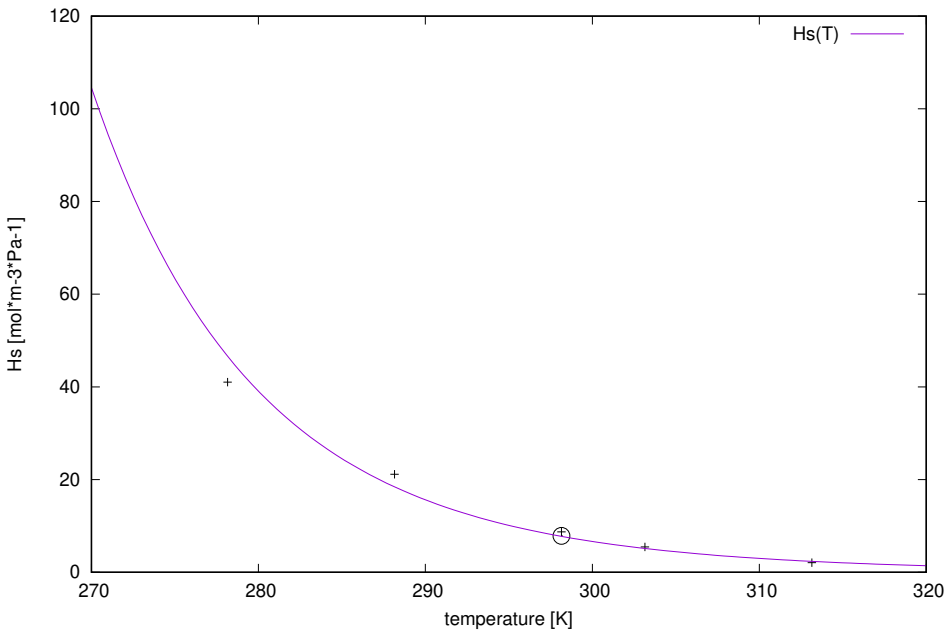

ref = 3683; chem = PBDE-167; casrn = 446255-17-0; r2 = 0.98747

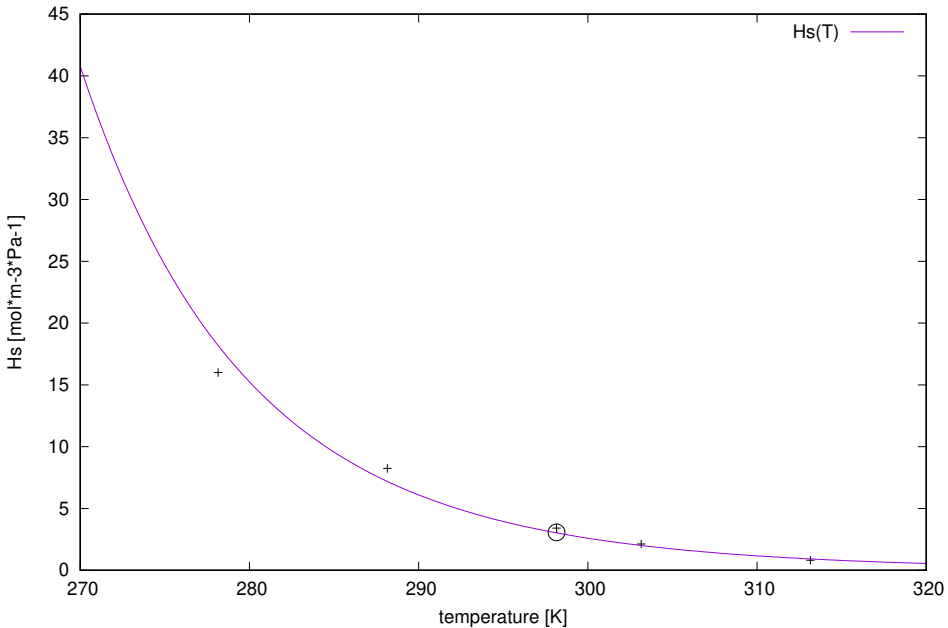

ref = 3683; chem = PBDE-169; casrn = 446255-18-1; r2 = 0.98734

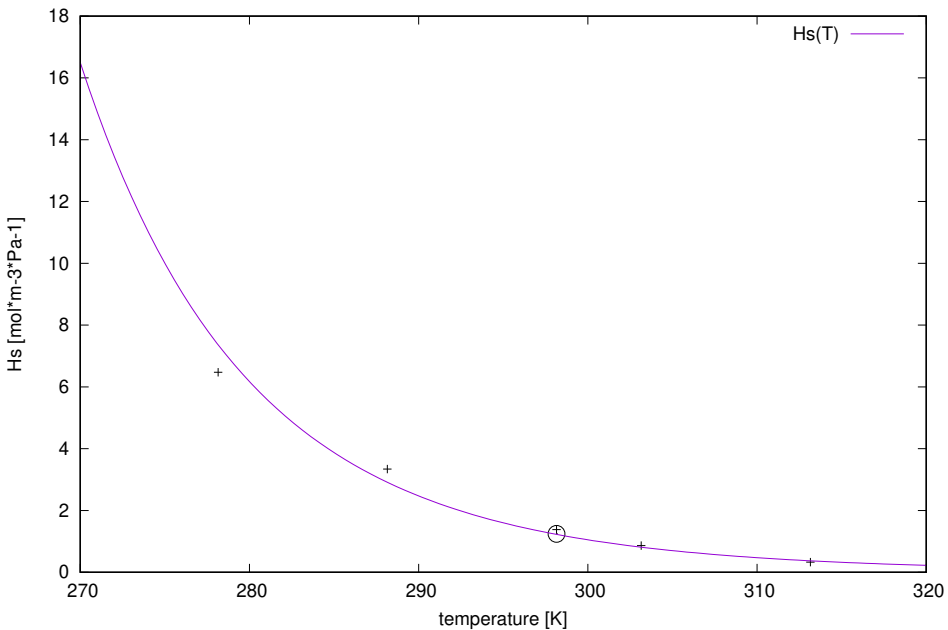

ref = 3683; chem = PBDE-171; casrn = 446255-19-2; r2 = 0.98734

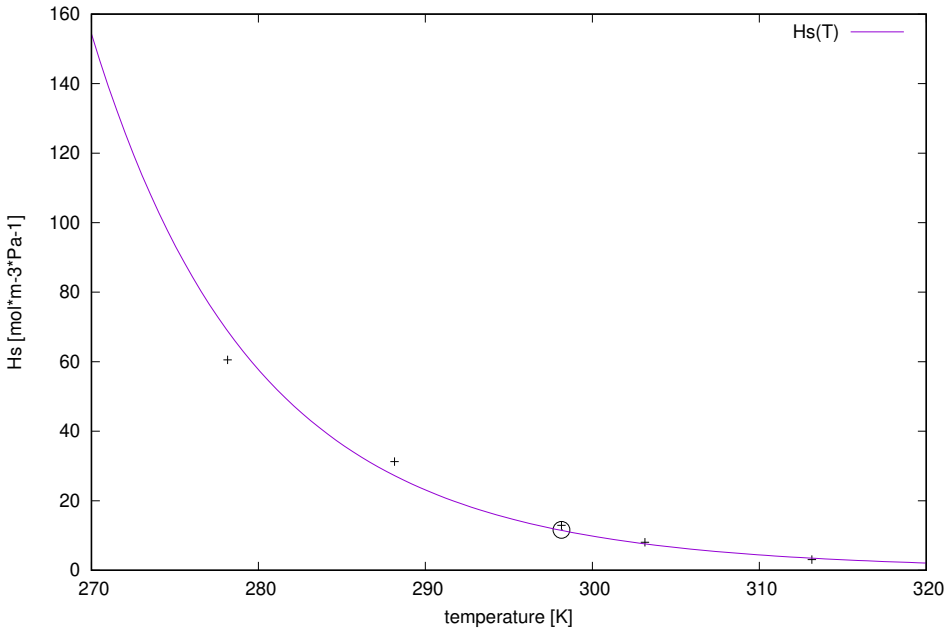

ref = 3683; chem = PBDE-173; casrn = 446255-20-5; r2 = 0.98734

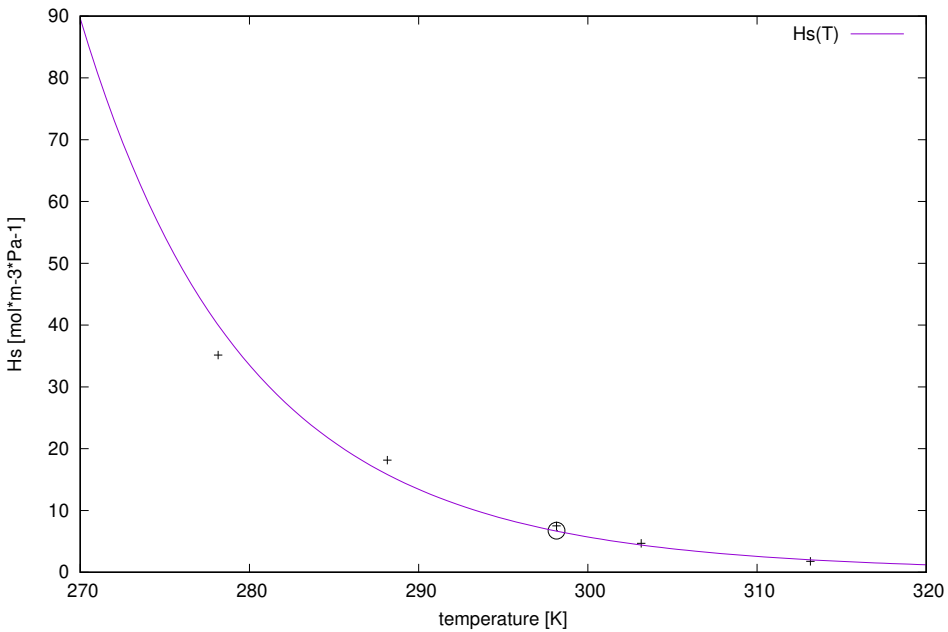

ref = 3683; chem = PBDE-174; casrn = 446255-21-6; r2 = 0.98757

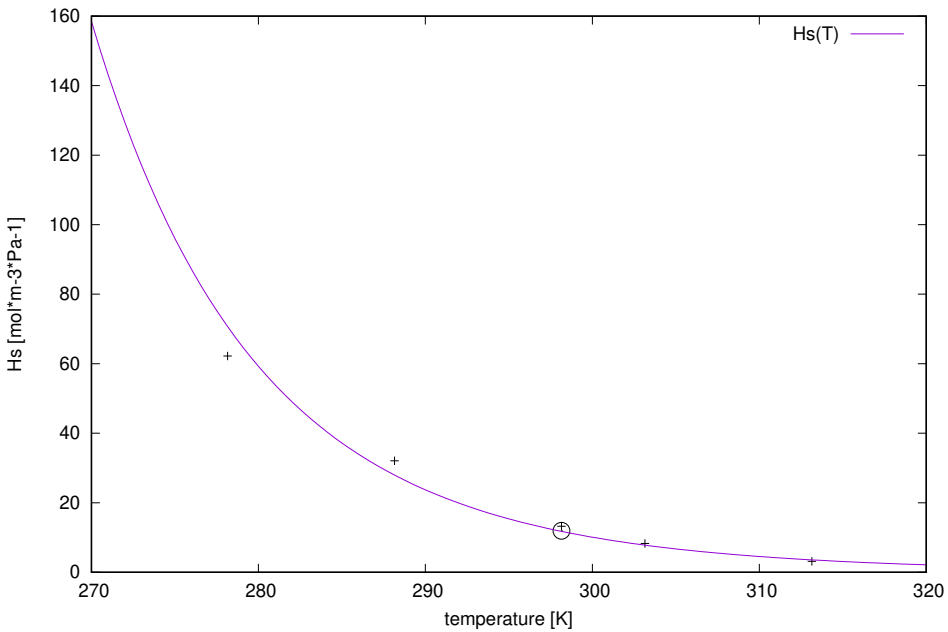



ref = 3683; chem = PBDE-177; casrn = 446255-23-8; r2 = 0.98734

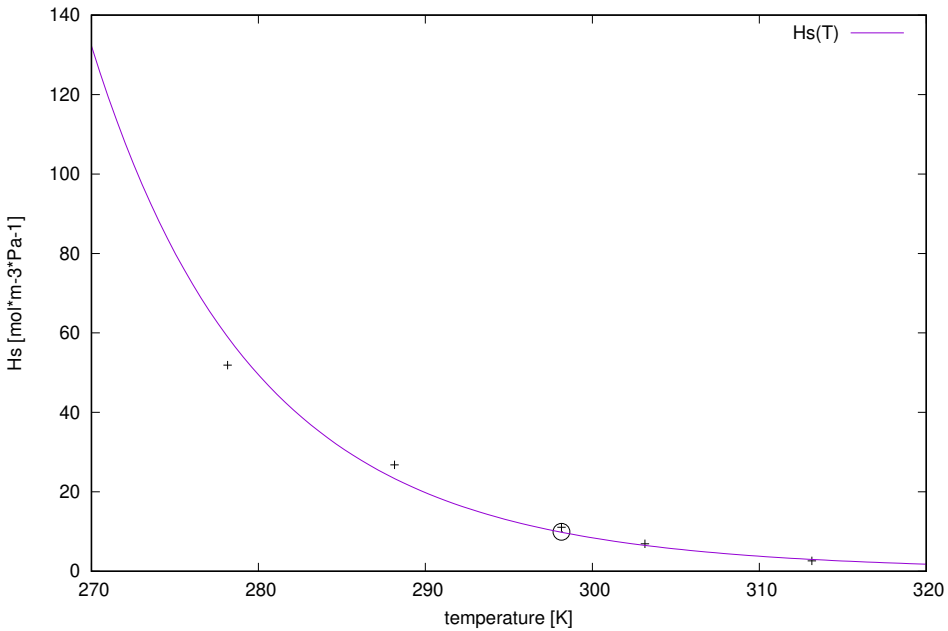

ref = 3683; chem = PBDE-178; casrn = 446255-24-9; r2 = 0.98734

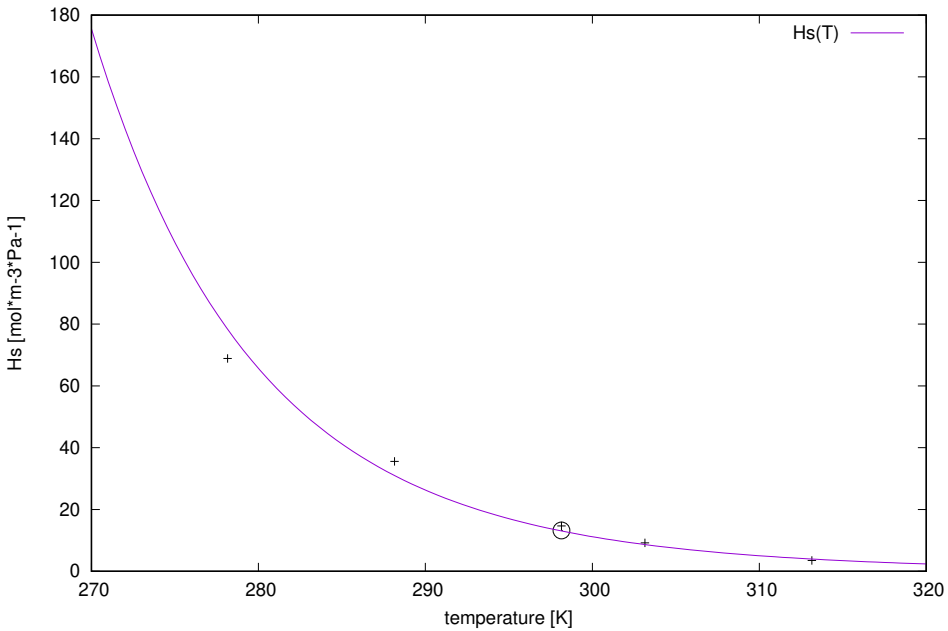

ref = 3683; chem = PBDE-179; casrn = 446255-25-0; r2 = 0.98734

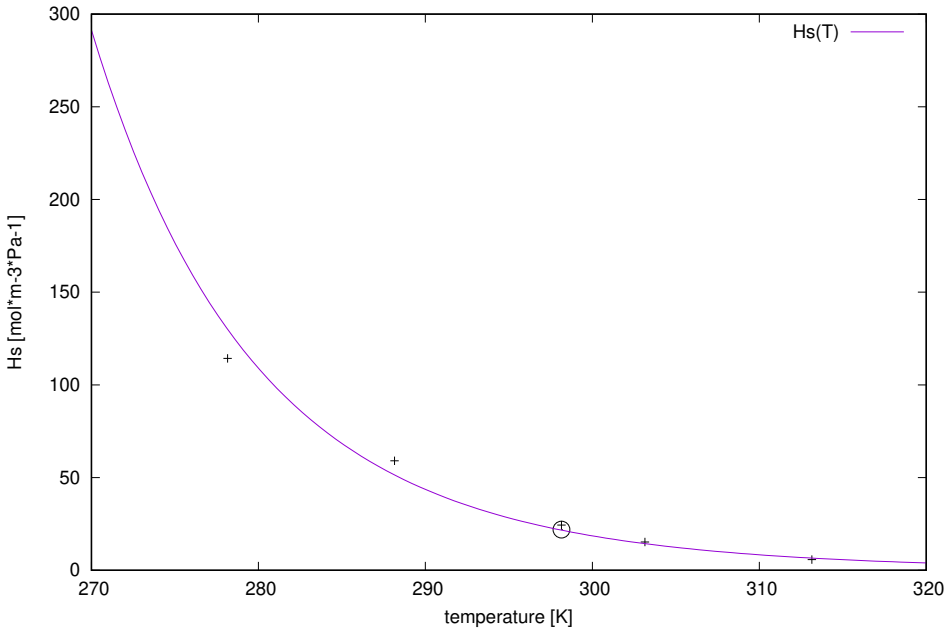

ref = 3683; chem = PBDE-180; casrn = 446255-26-1; r2 = 0.98734

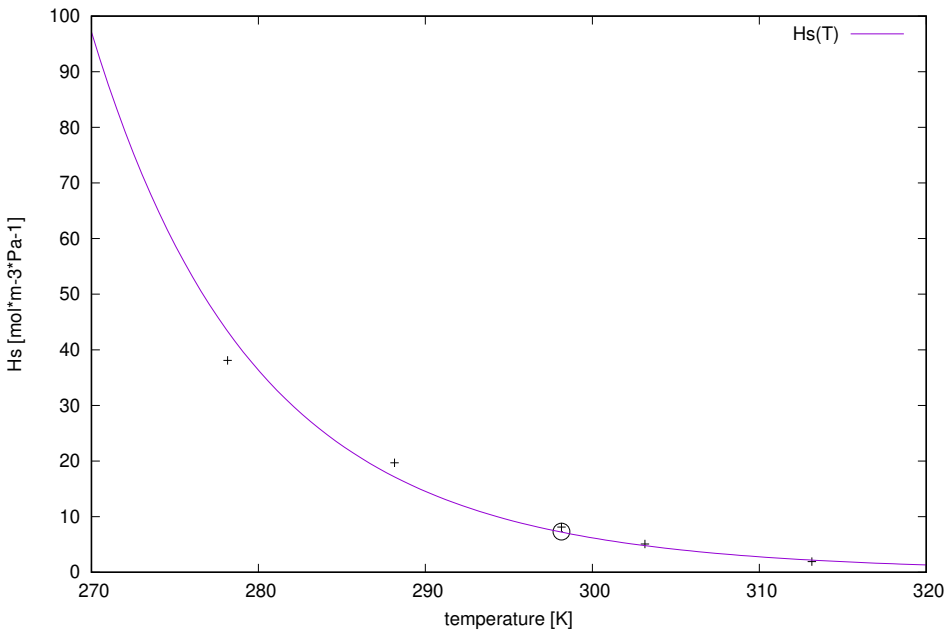

ref = 3683; chem = PBDE-186; casrn = 446255-27-2; r2 = 0.98734

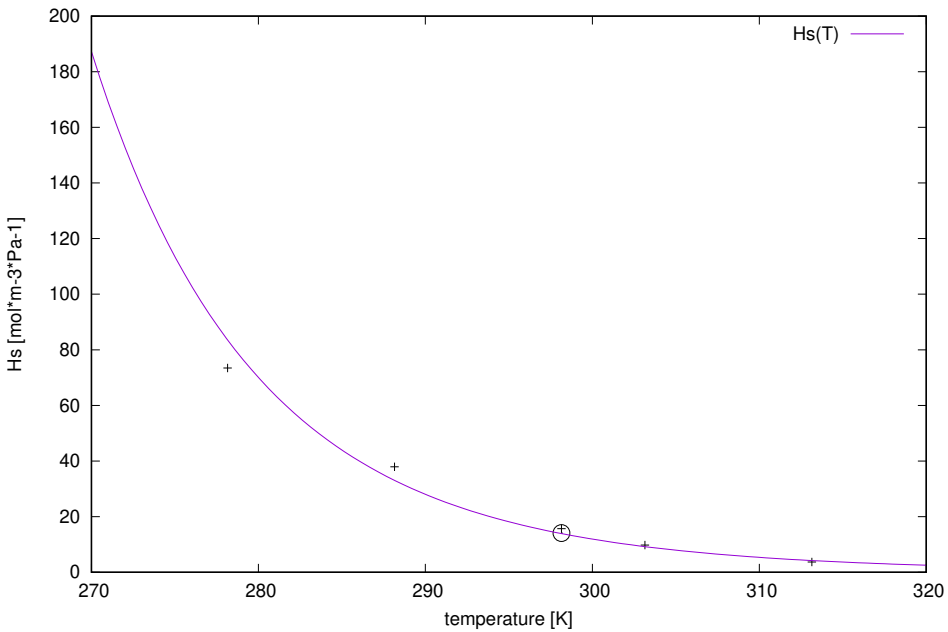

ref = 3683; chem = PBDE-187; casrn = 446255-28-3; r2 = 0.98747

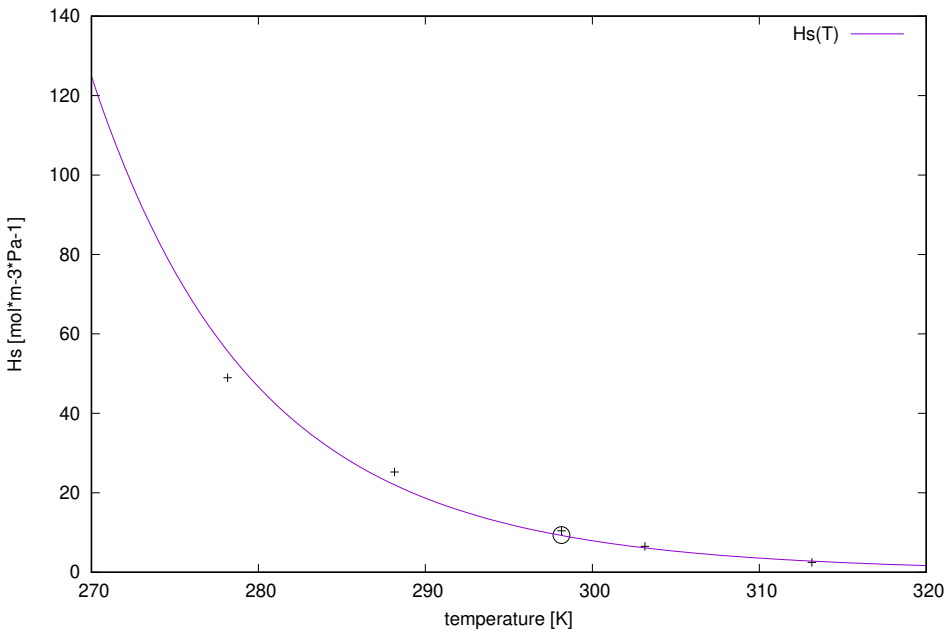

ref = 3683; chem = PBDE-191; casrn = 446255-30-7; r2 = 0.98734

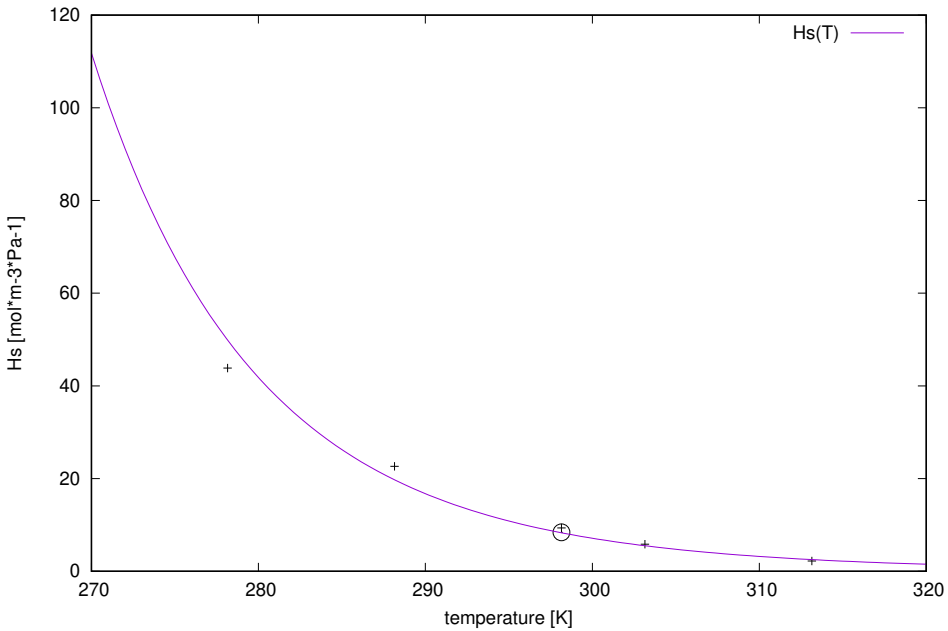

ref = 3683; chem = PBDE-193; casrn = 446255-34-1; r2 = 0.98734

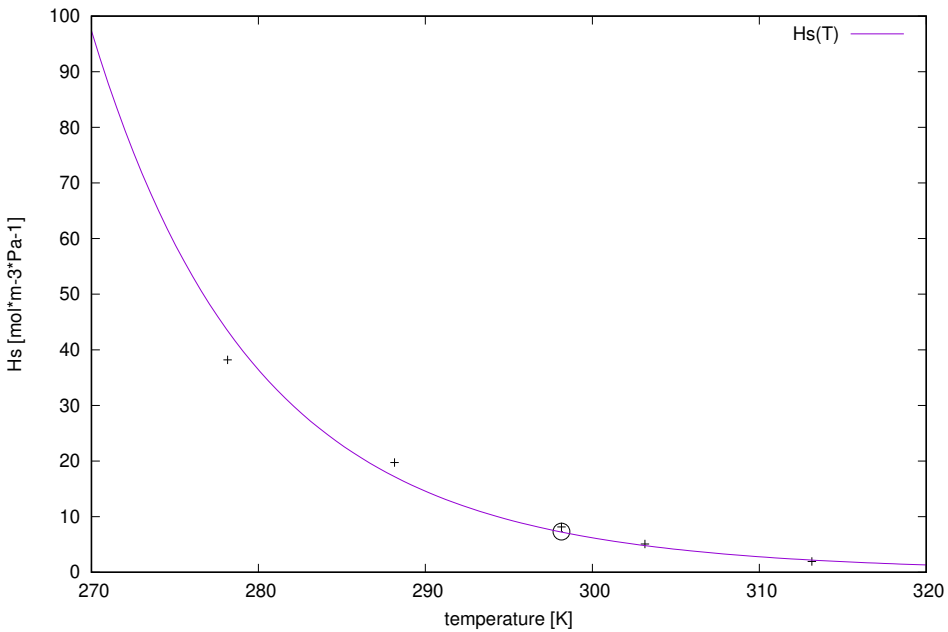



ref = 3683; chem = PBDE-195; casrn = 446255-38-5; r2 = 0.98734

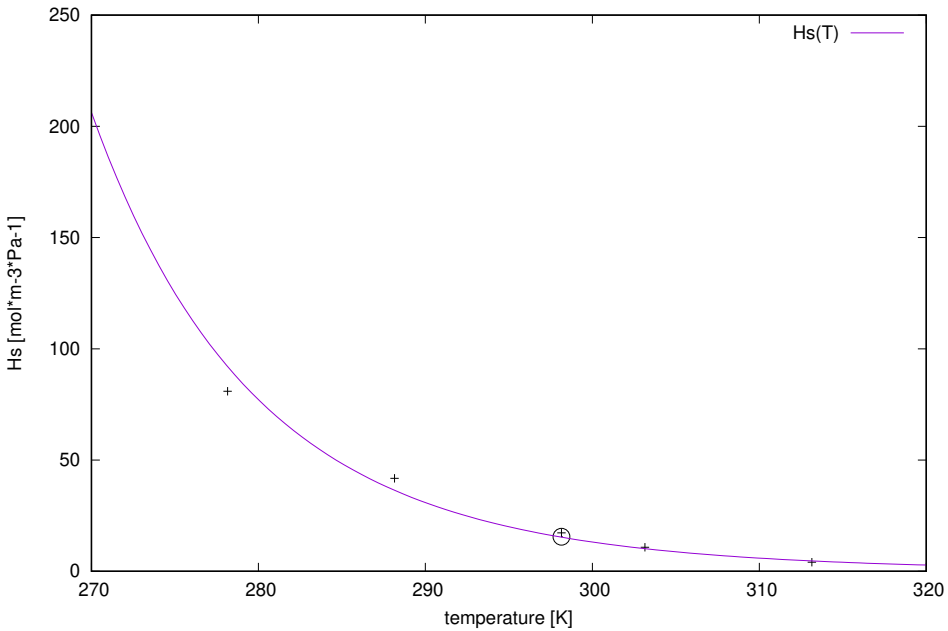

ref = 3683; chem = PBDE-196; casrn = 446255-39-6; r2 = 0.98734

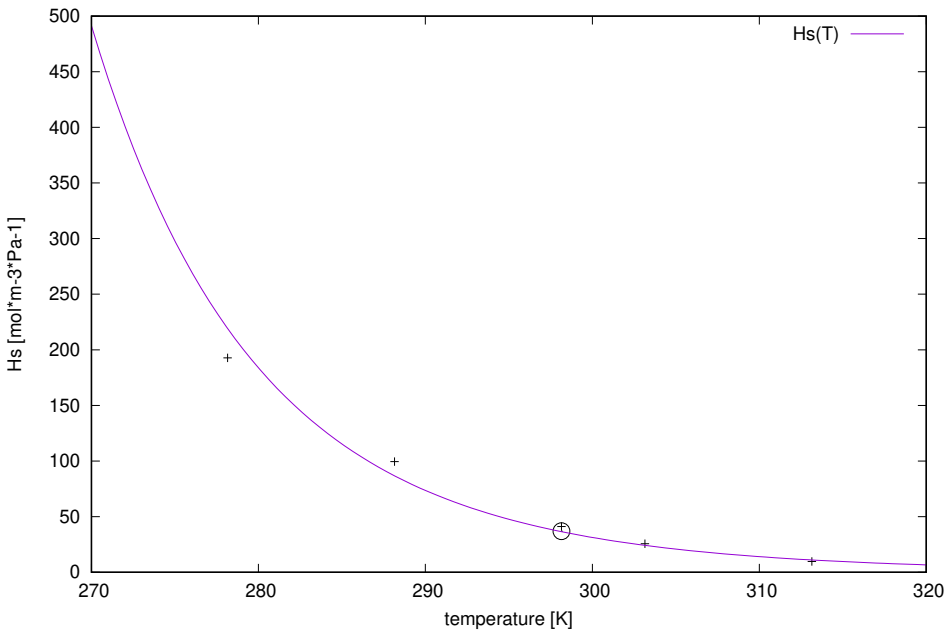

ref = 3683; chem = PBDE-198; casrn = 446255-42-1; r2 = 0.98734

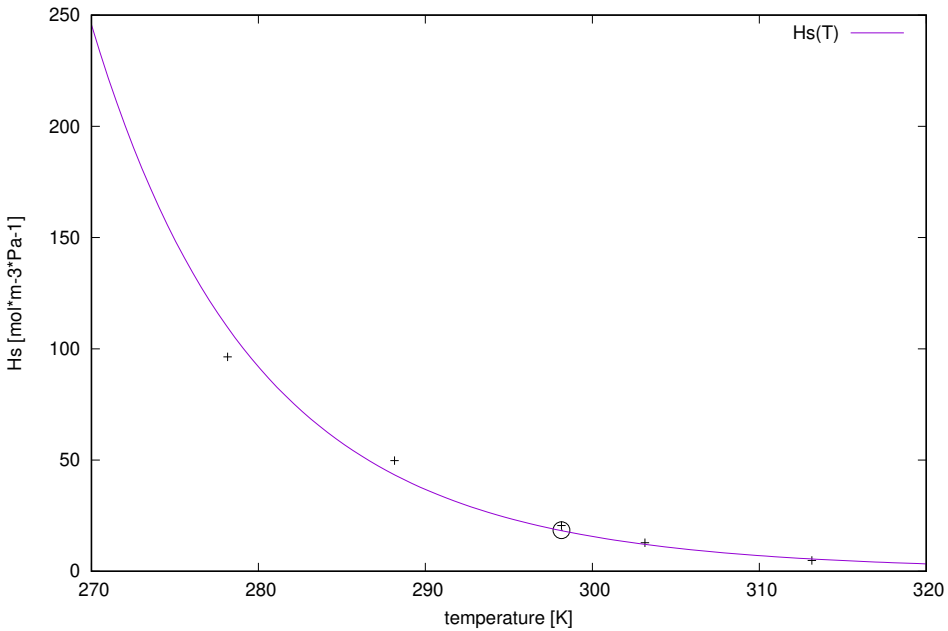

ref = 3683; chem = PBDE-199; casrn = 446255-43-2; r2 = 0.98747

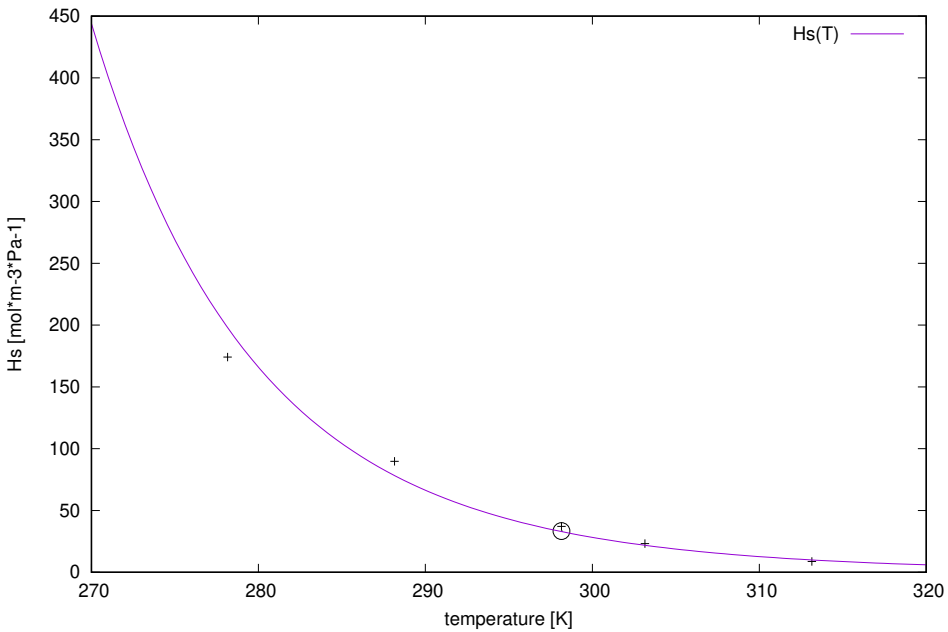

ref = 3683; chem = PBDE-200; casrn = 446255-46-5; r2 = 0.98734

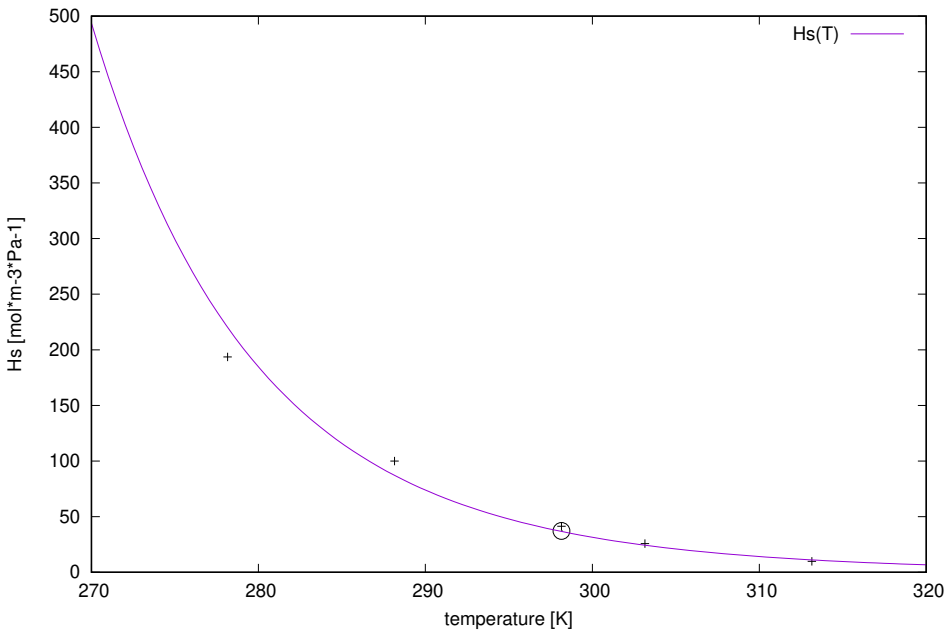

ref = 3683; chem = PBDE-201; casrn = 446255-50-1; r2 = 0.98734

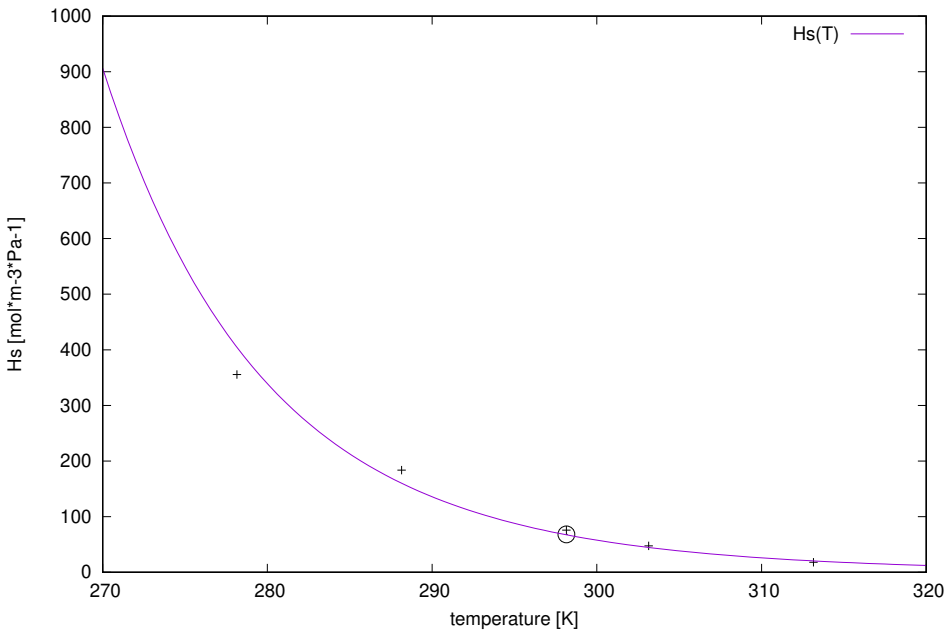

ref = 3683; chem = PBDE-204; casrn = 446255-54-5; r2 = 0.98734

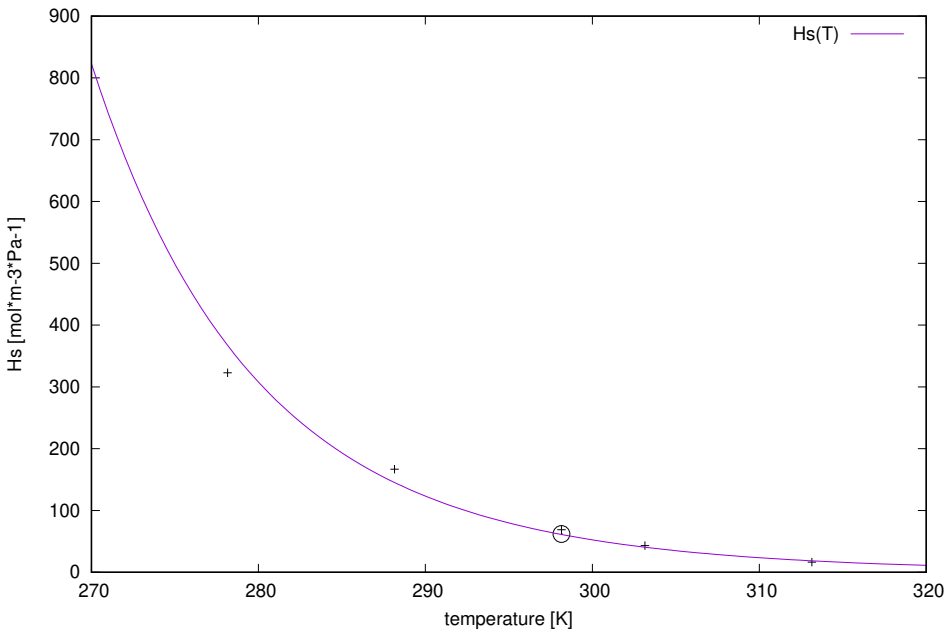

ref = 3683; chem = PBDE-205; casrn = 446255-56-7; r2 = 0.98747

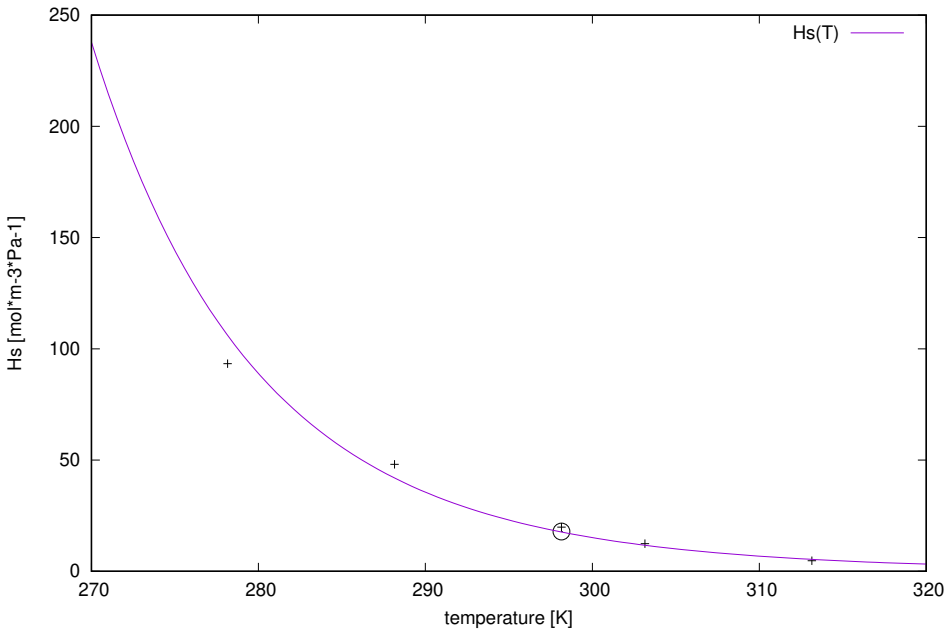



ref = 3683; chem = PBDE-14; casrn = 46438-88-4; r2 = 0.98734

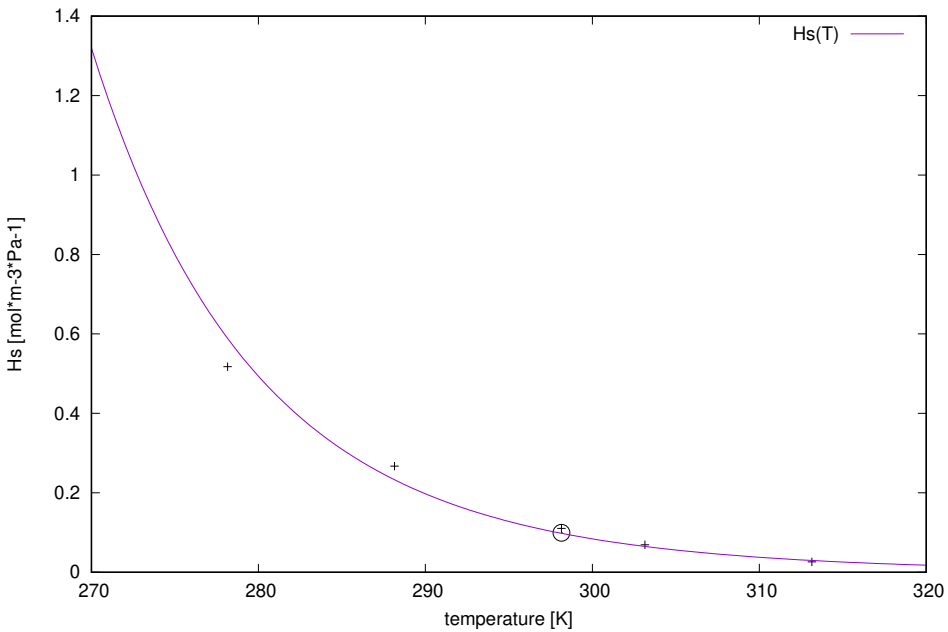

ref = 3683; chem = PBDE-33; casrn = 49690-94-0; r2 = 0.98734

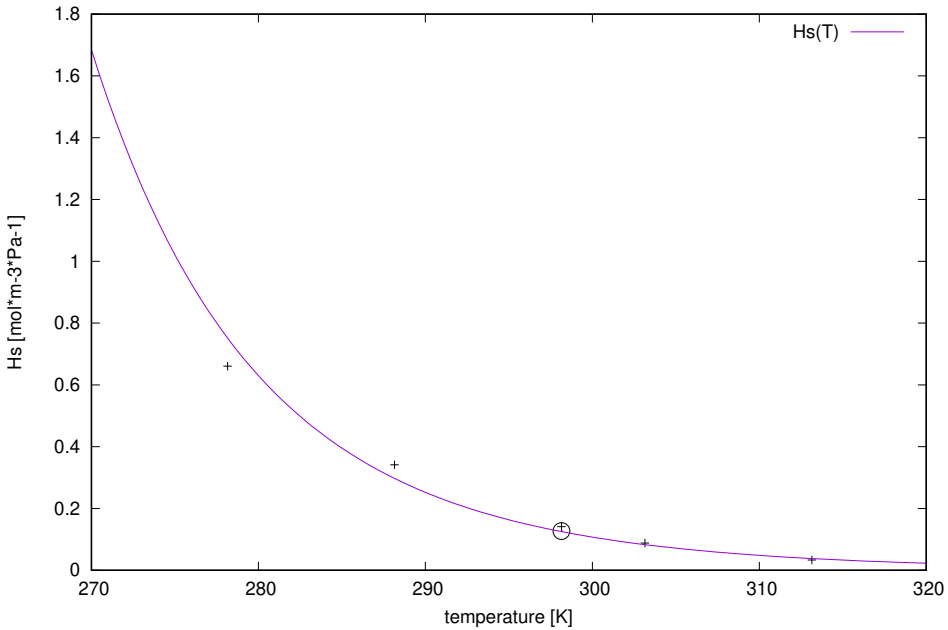

ref = 3683; chem = PBDE-4; casrn = 51452-87-0; r2 = 0.98734

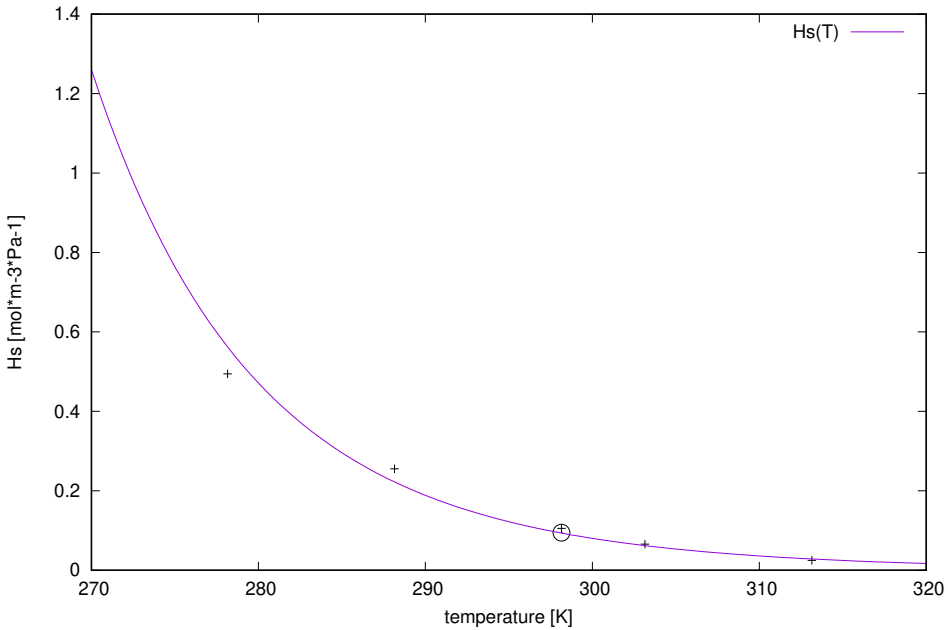

ref = 3683; chem = PBDE-10; casrn = 51930-04-2; r2 = 0.98734

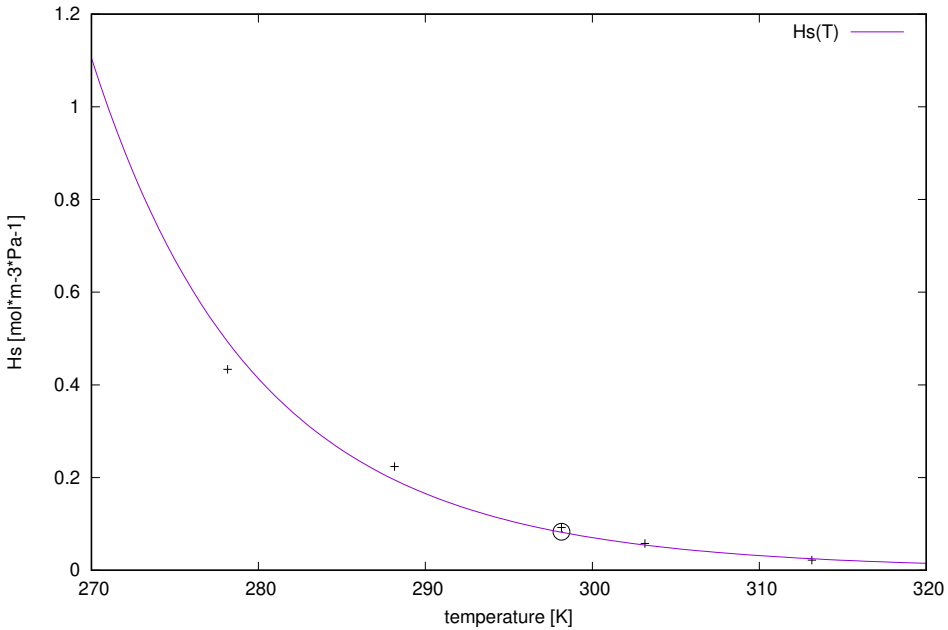

ref = 3683; chem = PBDE-168; casrn = 53551-87-4; r2 = 0.98757

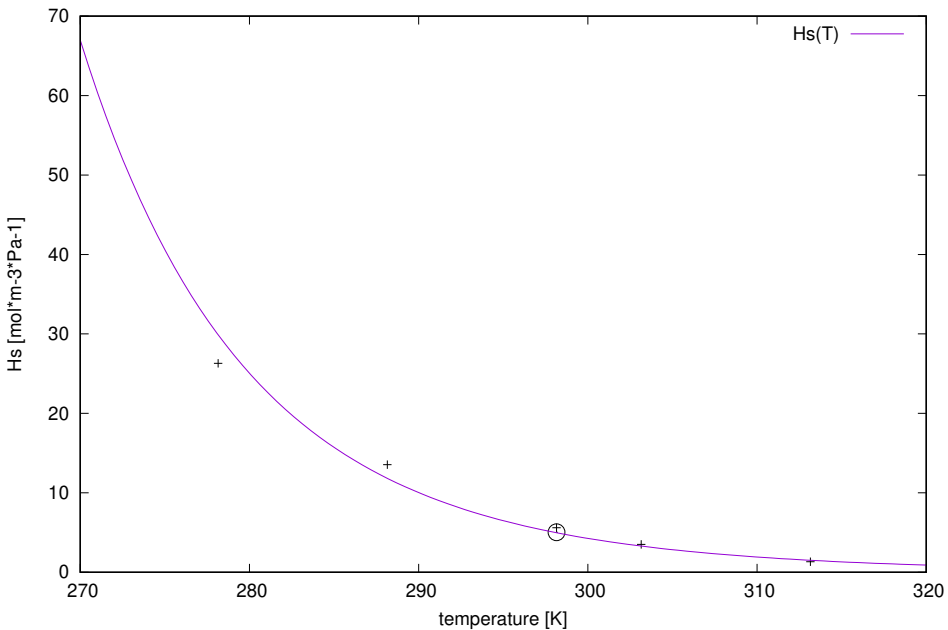

ref = 3683; chem = PBDE-47; casrn = 5436-43-1; r2 = 0.97960

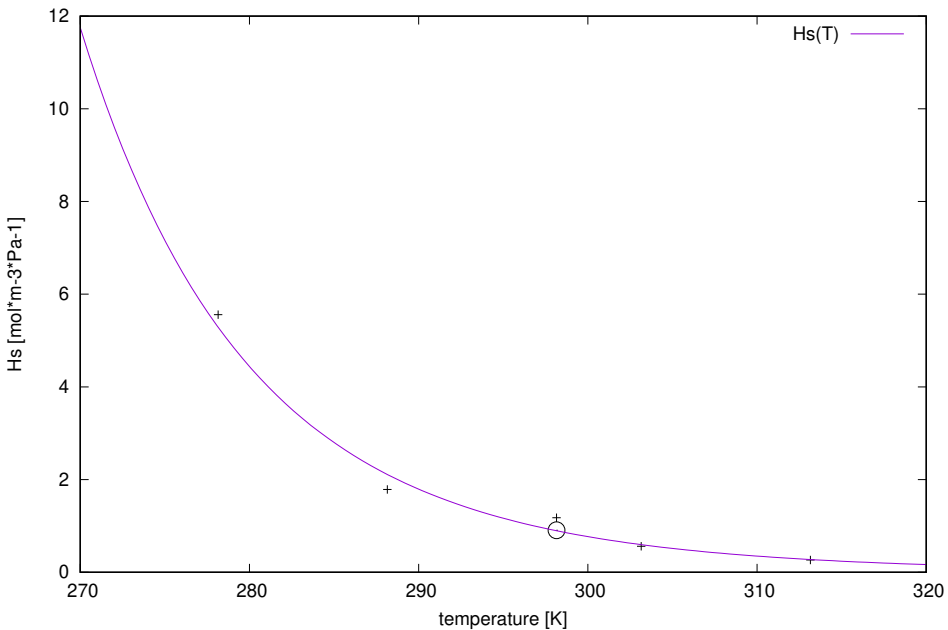

ref = 3683; chem = PBDE-99; casrn = 60348-60-9; r2 = 0.97101

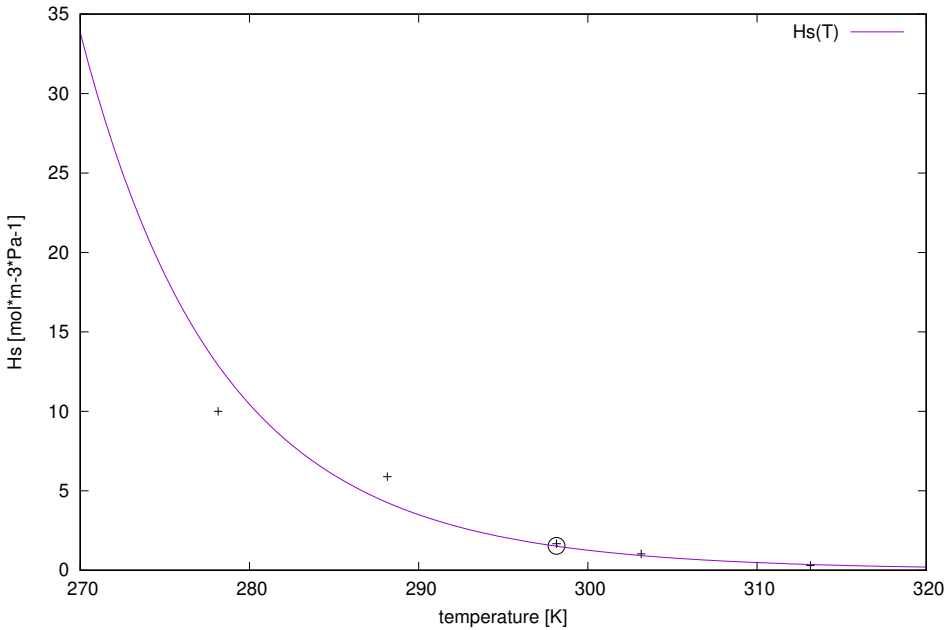

ref = 3683; chem = PBDE-175; casrn = 6255-22-7; r2 = 0.98738

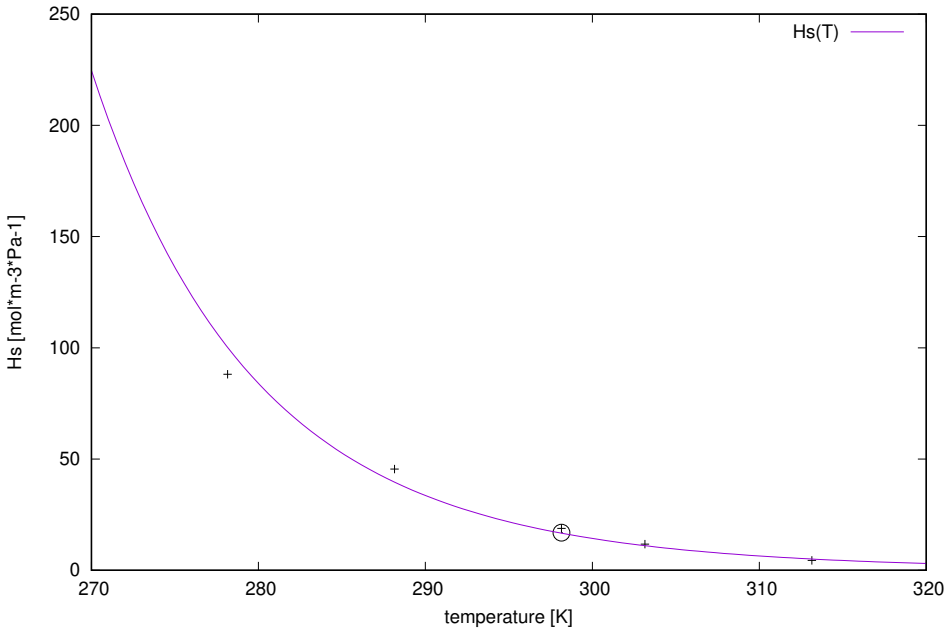



ref = 3683; chem = PBDE-206; casrn = 63387-28-0; r2 = 0.98734

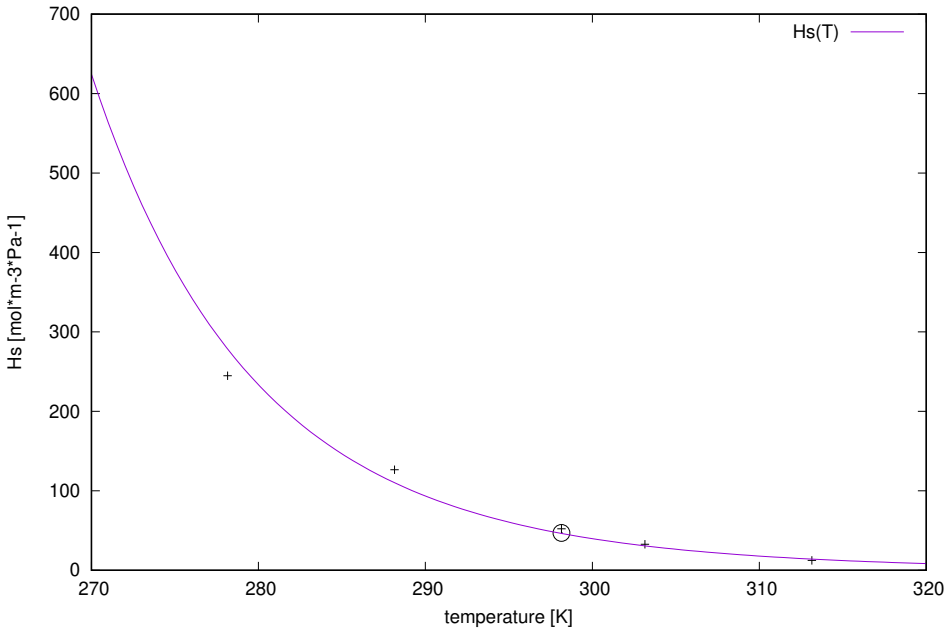

ref = 3683; chem = PBDE-31; casrn = 65075-08-3; r2 = 0.98757

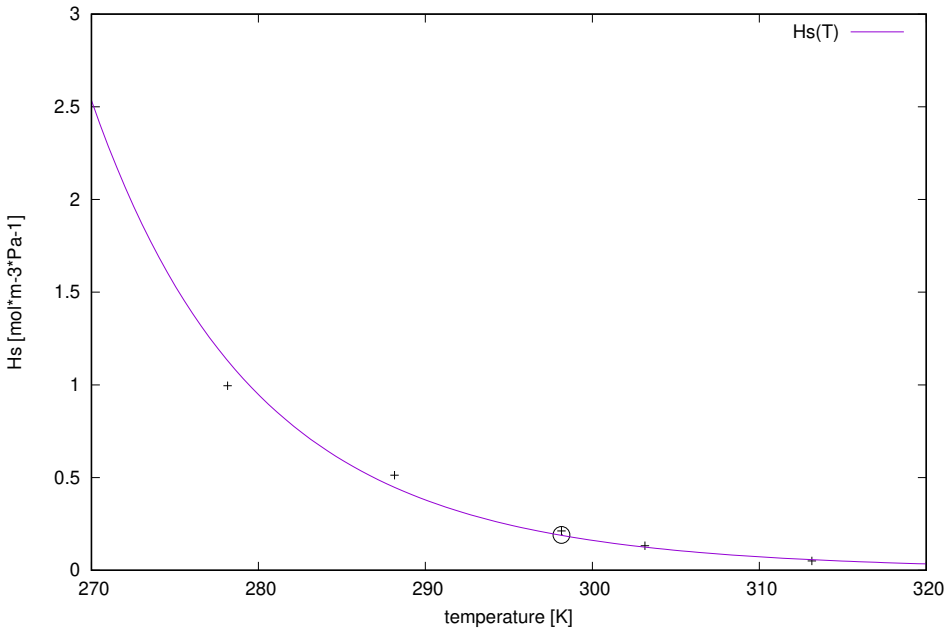

ref = 3683; chem = PBDE-202; casrn = 67797-09-5; r2 = 0.98734

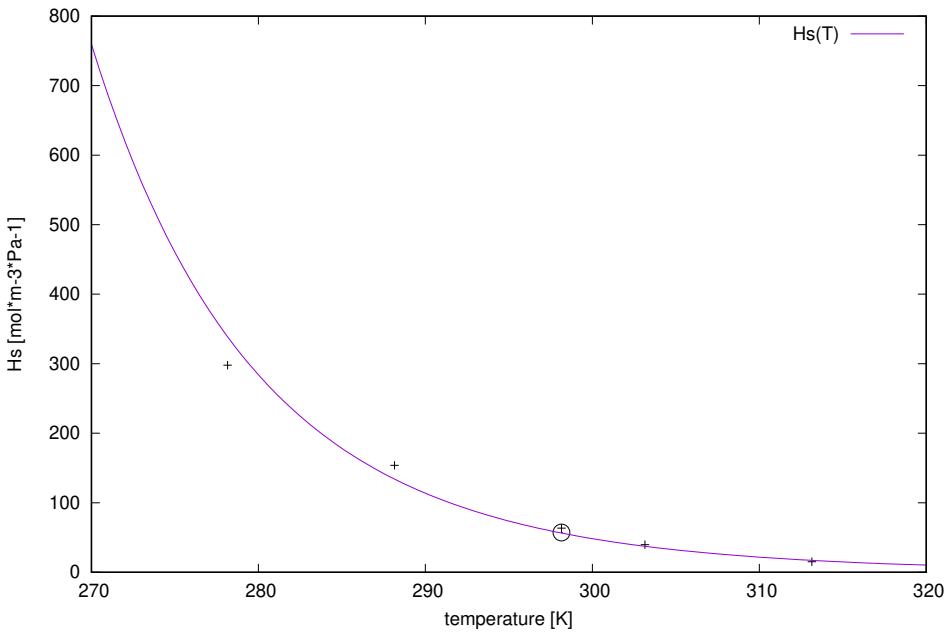

ref = 3683; chem = PBDE-153; casrn = 68631-49-2; r2 = 0.95999

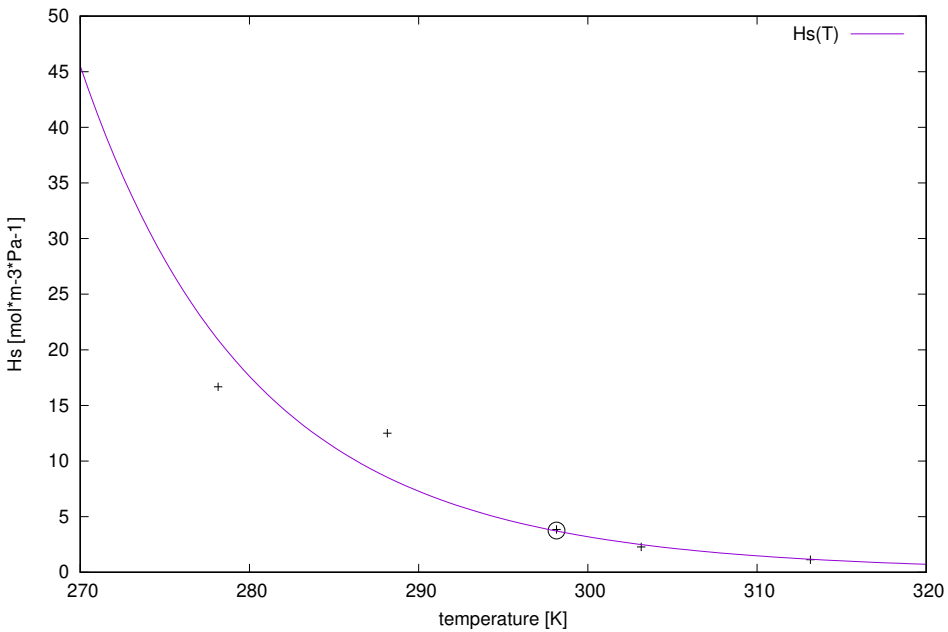

ref = 3683; chem = PBDE-2; casrn = 6876-00-2; r2 = 0.98734

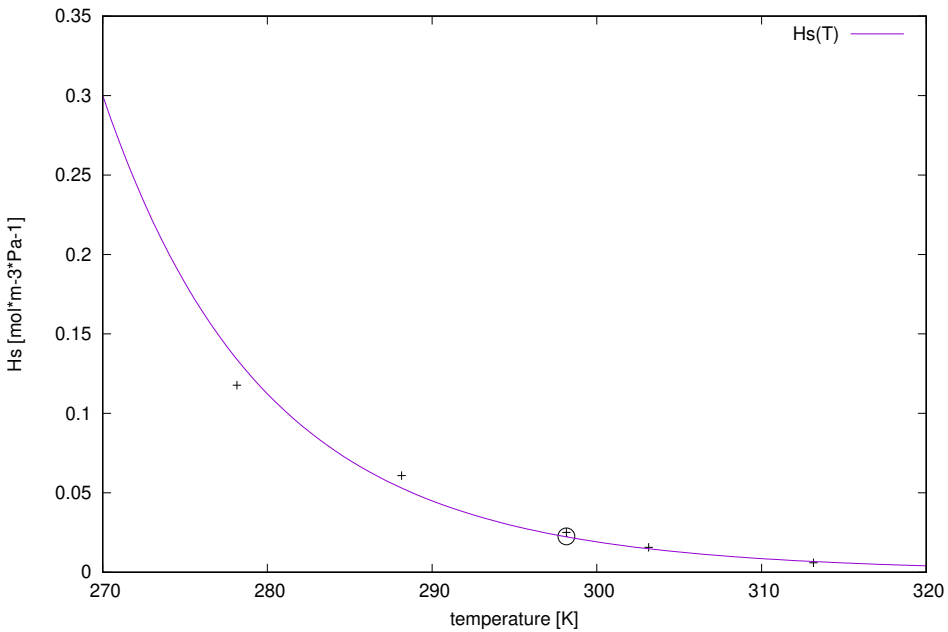

ref = 3683; chem = PBDE-11; casrn = 6903-63-5; r2 = 0.98734

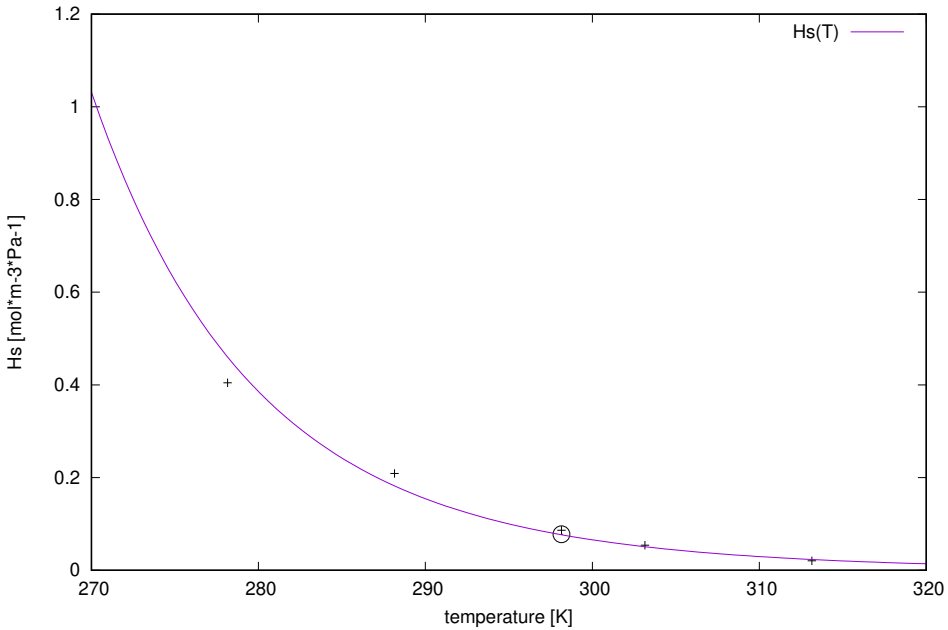

ref = 3683; chem = PBDE-13; casrn = 83694-71-7; r2 = 0.98757

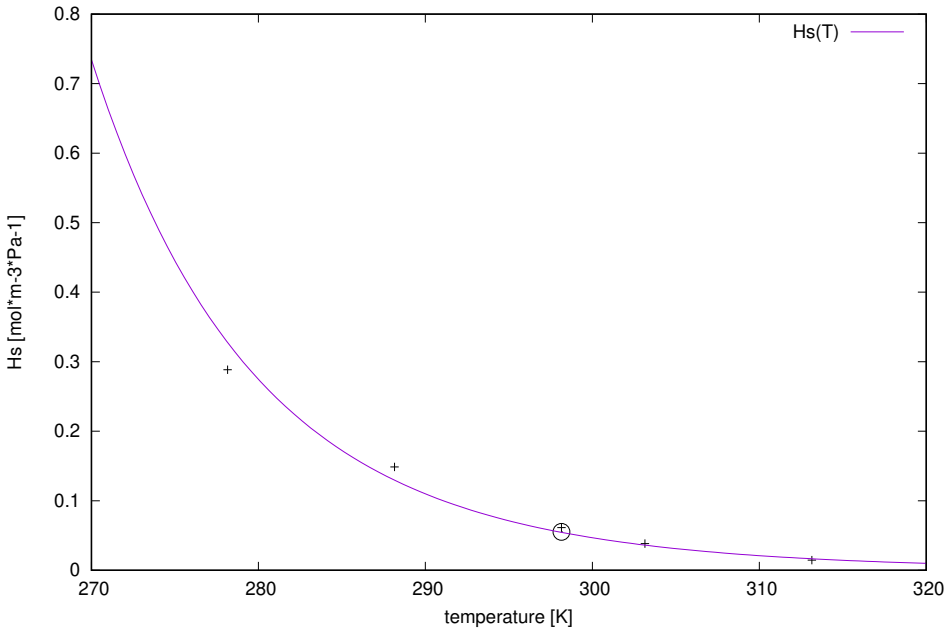

ref = 3683; chem = PBDE-77; casrn = 93703-48-1; r2 = 0.98734

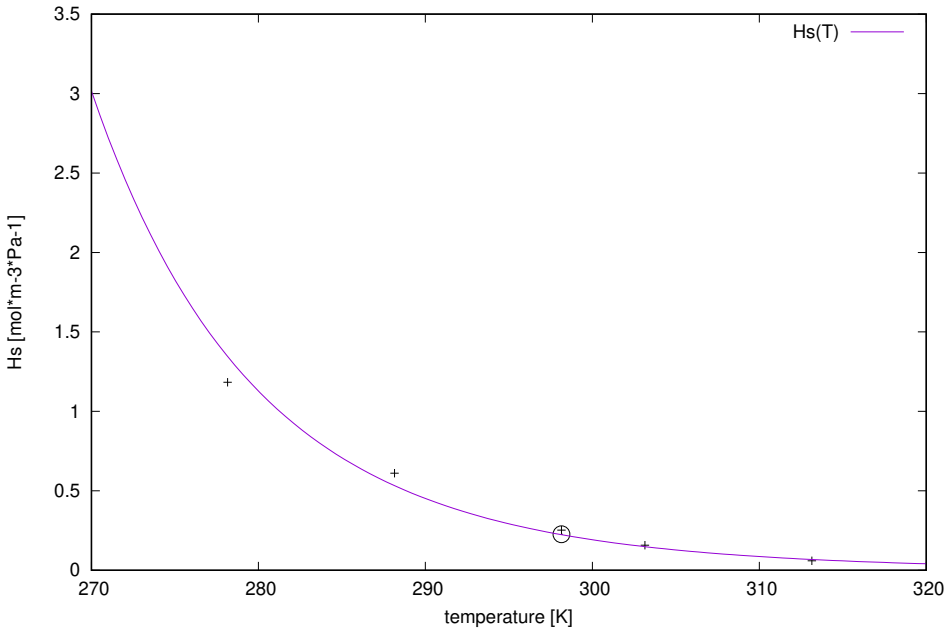



ref = 3685; chem = 1-propanamine; casrn = 107-10-8; r2 = 0.99287

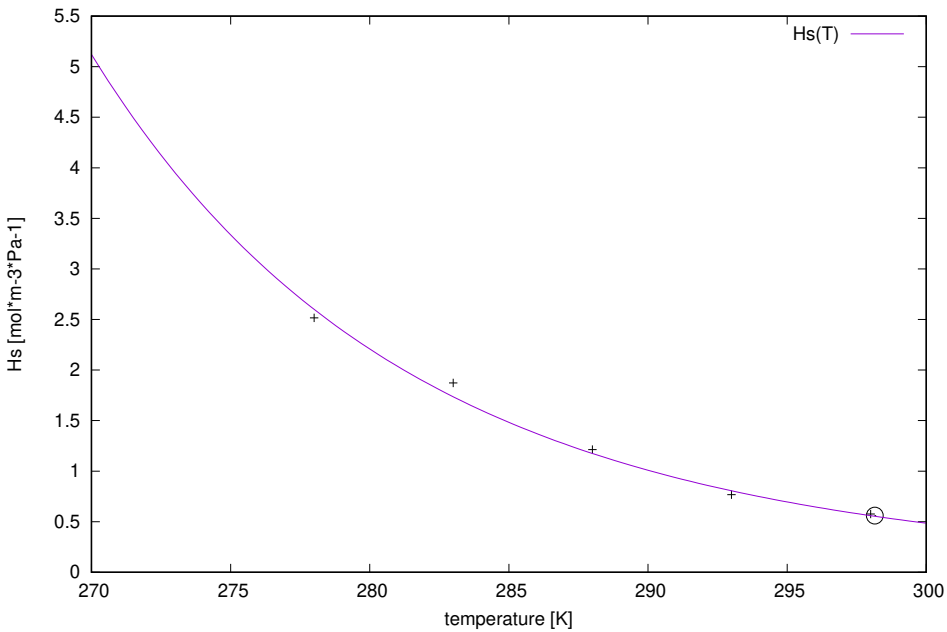

ref = 3685; chem = allylamine; casrn = 107-11-9; r2 = 0.99979

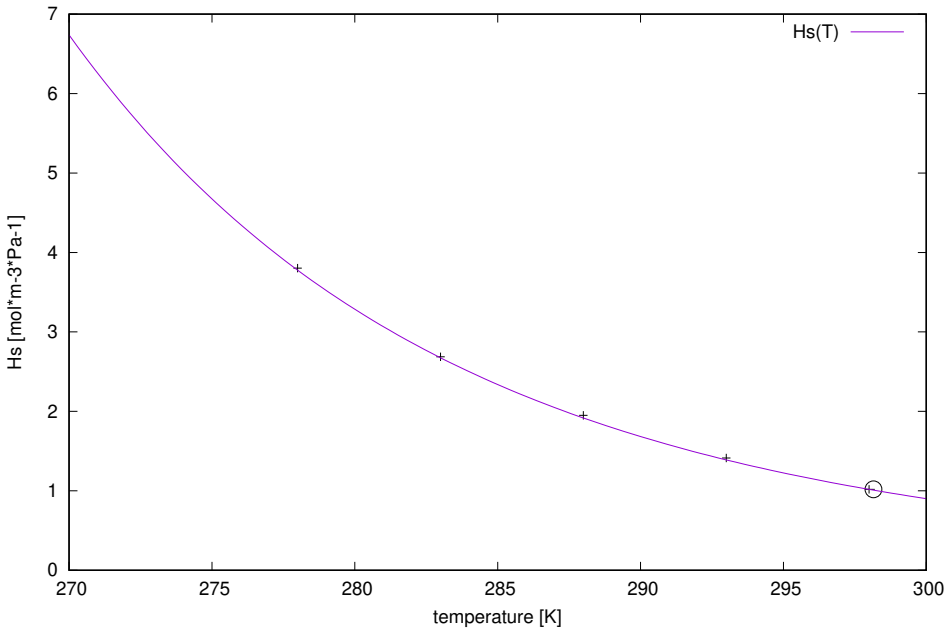

ref = 3685; chem = 4-methylmorpholine; casrn = 109-02-4; r2 = 0.93379

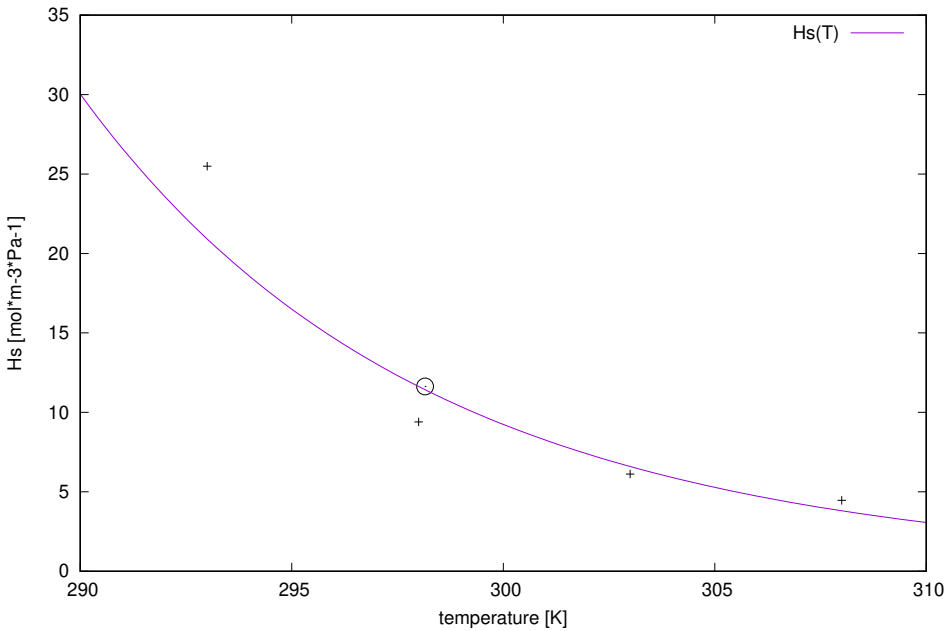

ref = 3685; chem = dipropylamine; casrn = 142-84-7; r2 = 0.99728

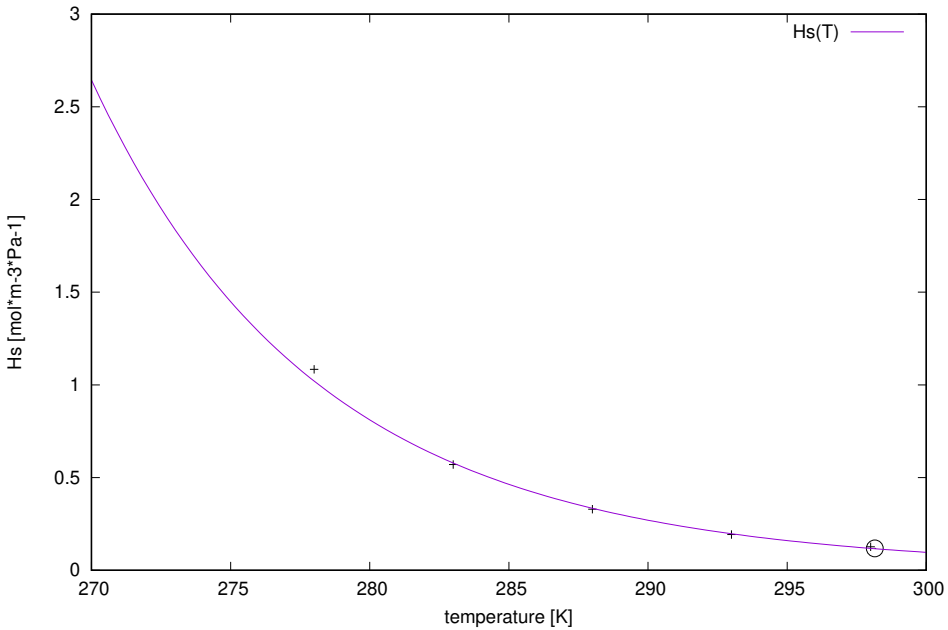

ref = 3685; chem = trimethylamine; casrn = 75-50-3; r2 = 0.99882

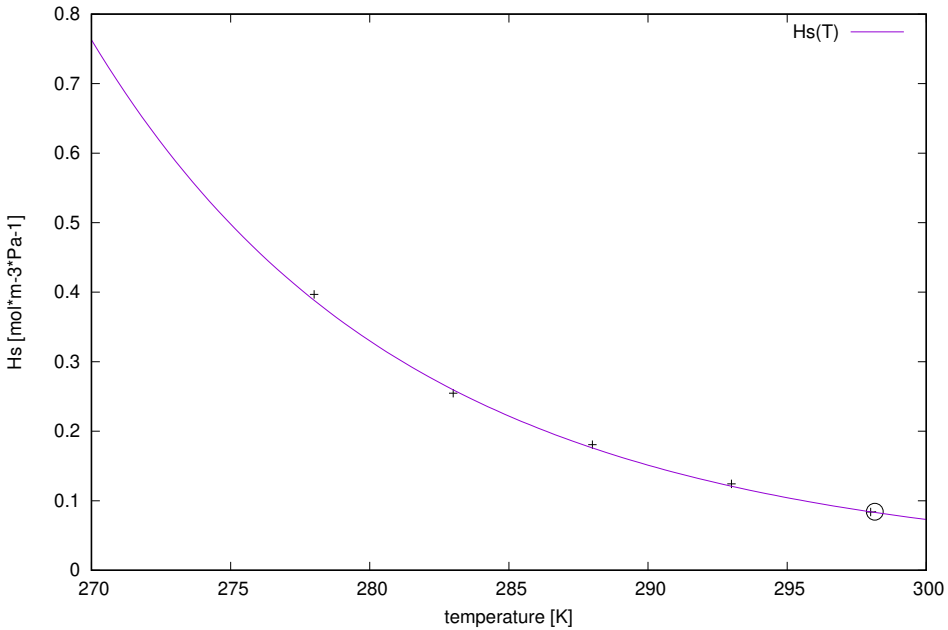

ref = 3686; chem = triethylamine; casrn = 121-44-8; r2 = 0.99715

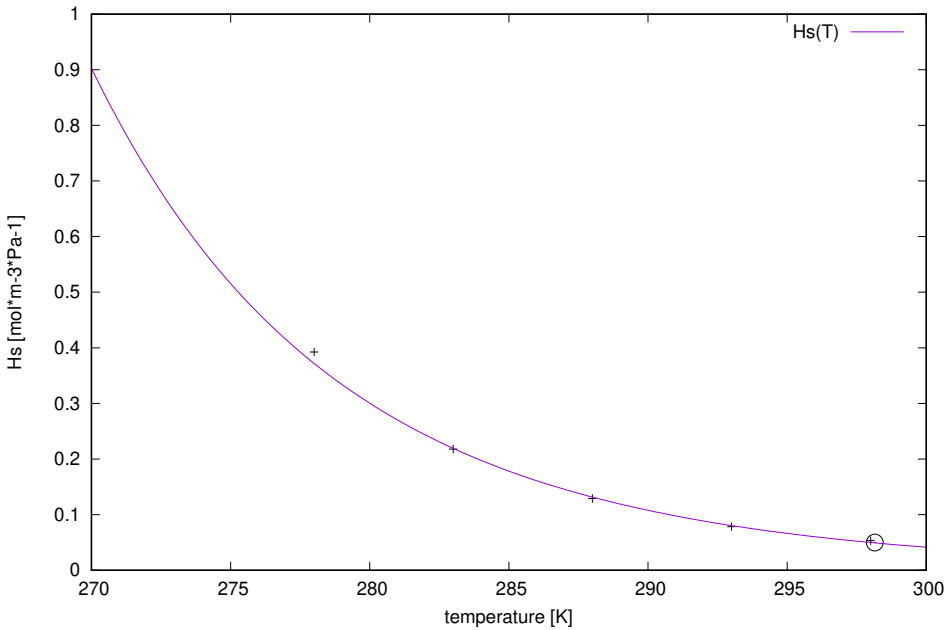

ref = 3690; chem = CCl4; casrn = 56-23-5; r2 = 0.99352

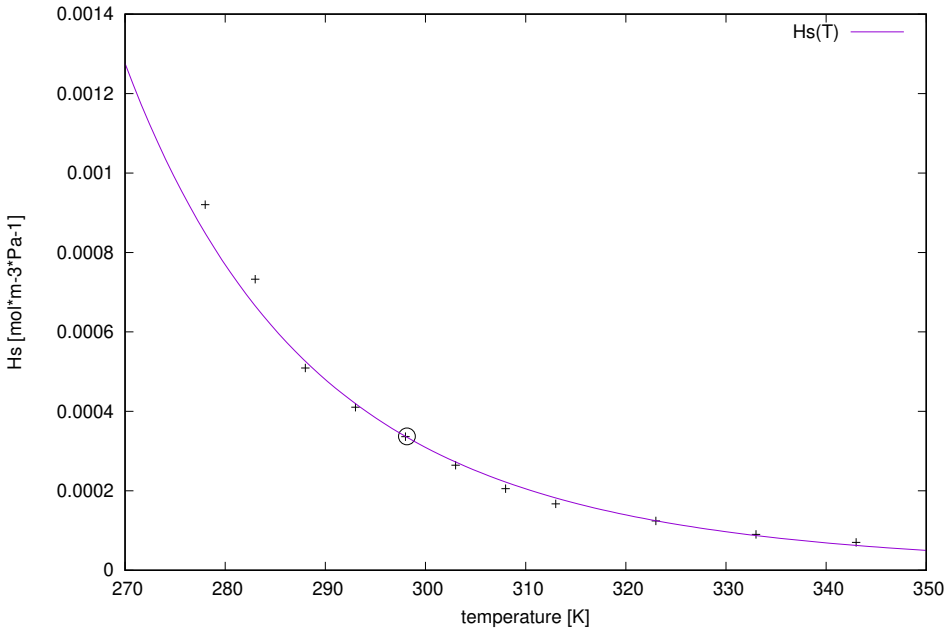

ref = 3690; chem = CHCl<sub>3</sub>; casrn = 67-66-3; r2 = 0.99147

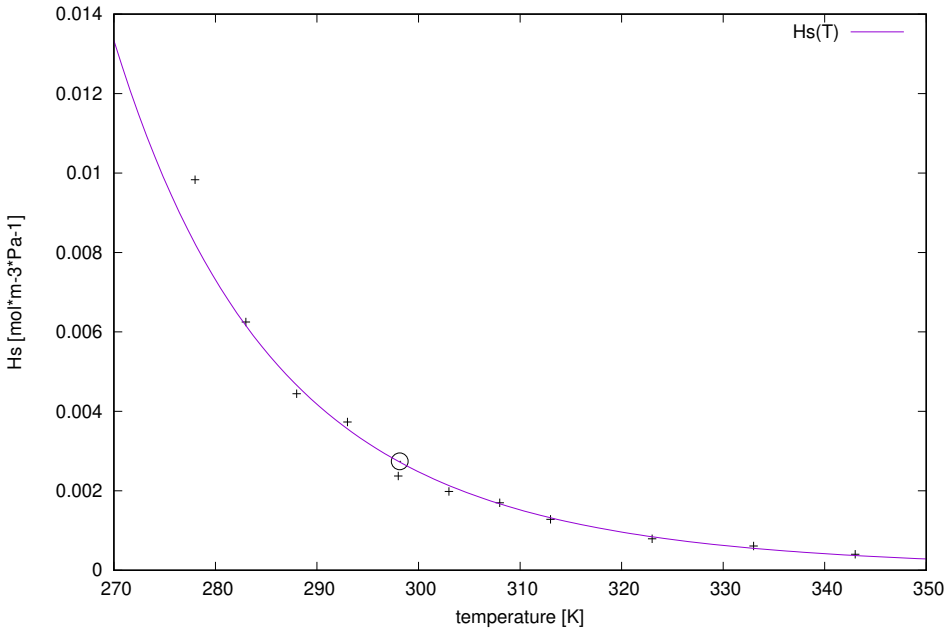



ref = 3690; chem = CH<sub>4</sub>; casrn = 74-82-8; r2 = 0.99059

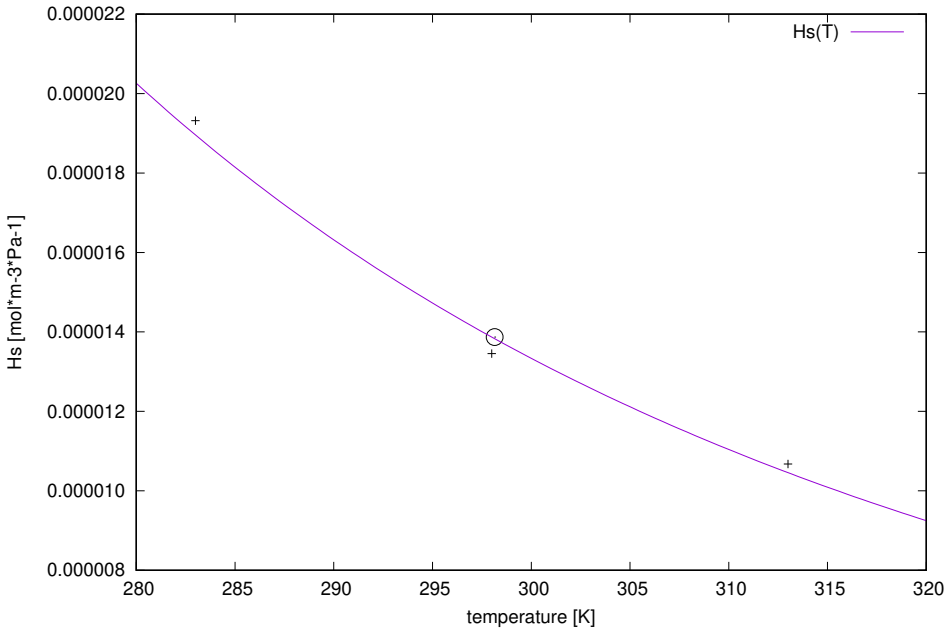

ref = 3690; chem = CH<sub>2</sub>Cl<sub>2</sub>; casrn = 75-09-2; r<sup>2</sup> = 0.99519

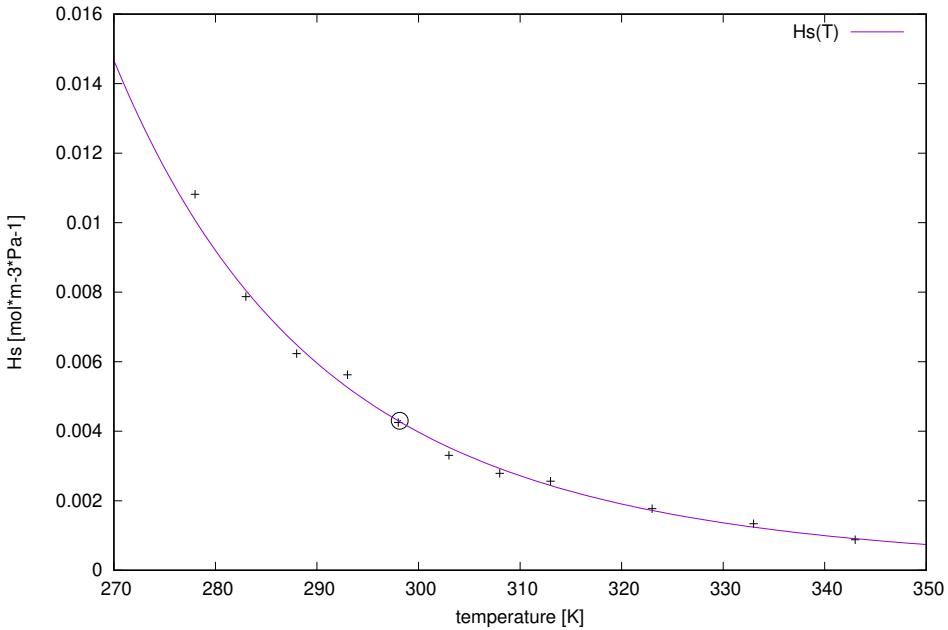

ref = 3691; chem = DIPE diisopropyl ether; casrn = 108-20-3; r2 = 0.96915

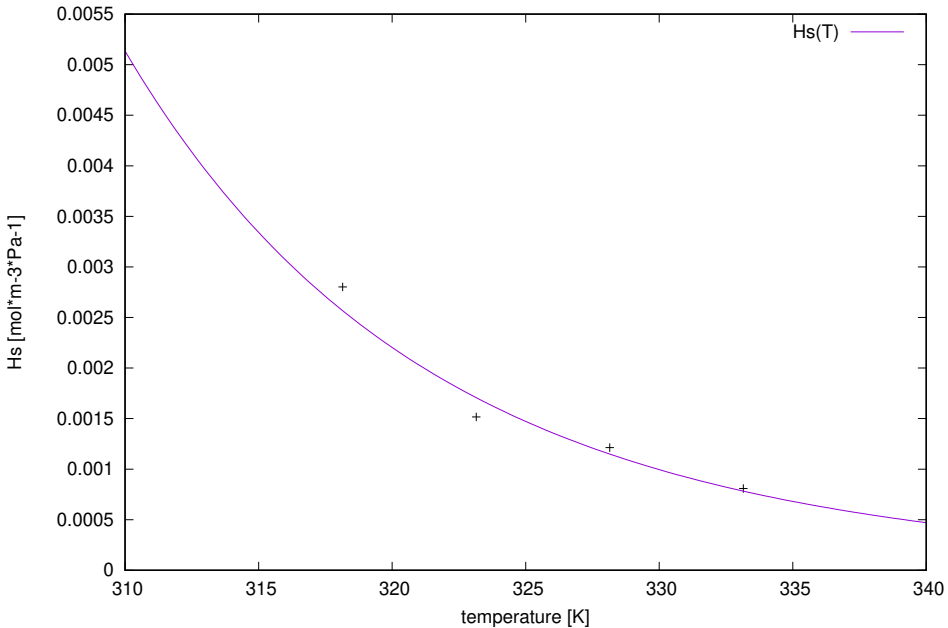

ref = 3691; chem = DBE dibutyl ether; casrn = 142-96-1; r2 = 0.96208

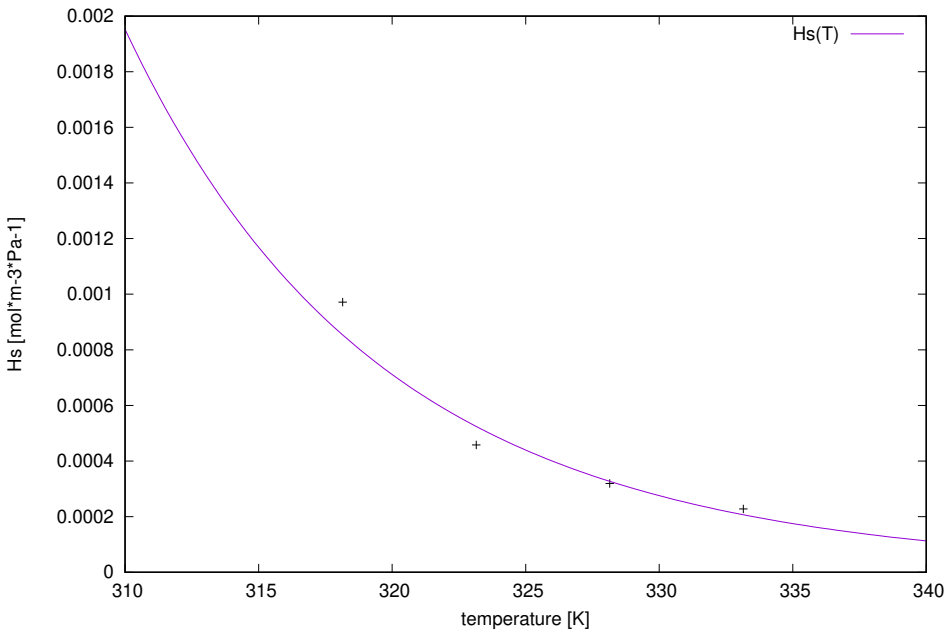

ref = 3691; chem = MTBE methyl tert-butyl ether; casrn = 1634-04-4; r2 = 0.87669

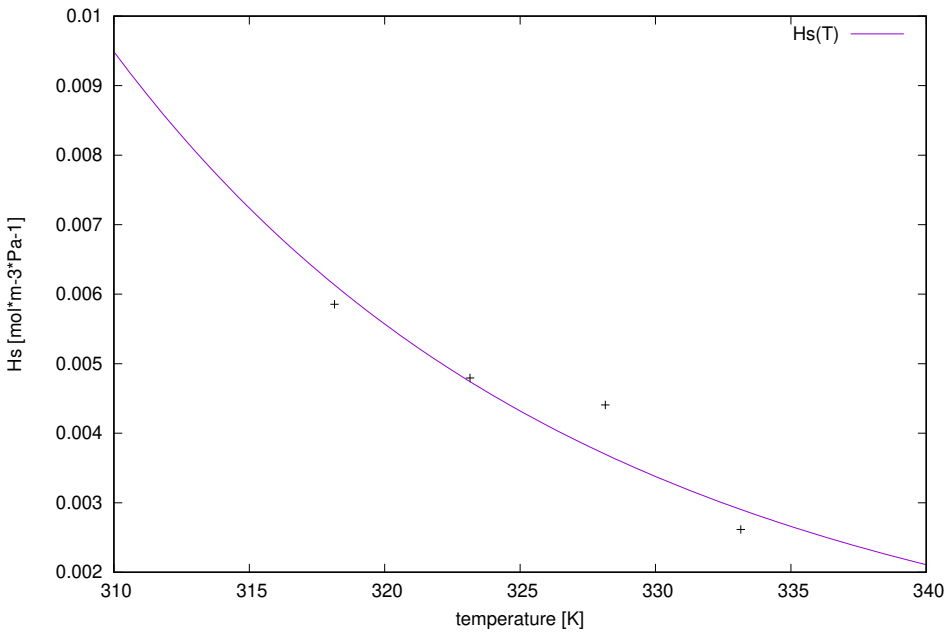

ref = 3691; chem = ETBE ethyl tert-butyl ether; casrn = 637-92-3; r2 = 0.96793

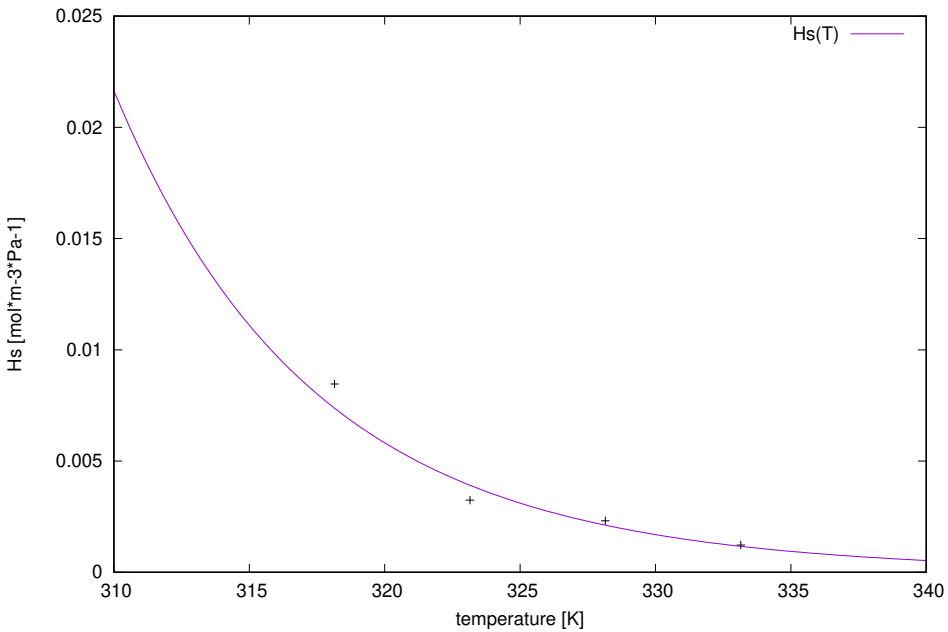

ref = 3691; chem = PVE propyl vinyl ether; casrn = 764-47-6; r2 = 0.96919

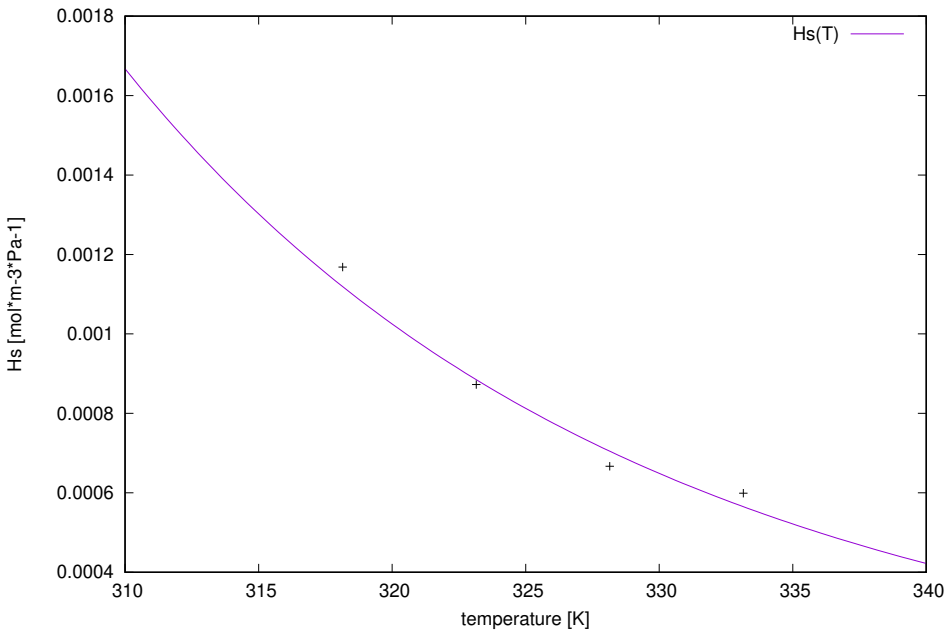

ref = 3691; chem = TAME 2-methoxy-2-methylbutane; casrn = 994-05-8; r2 = 0.90911

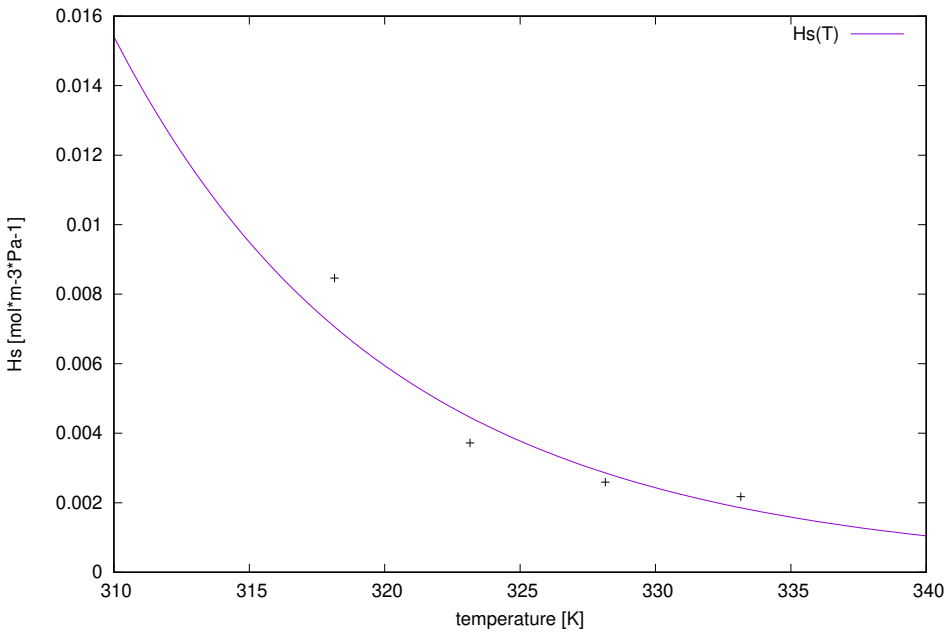



ref = 3692; chem = PCE tetrachloroethene; casrn = 127-18-4; r2 = 0.99951

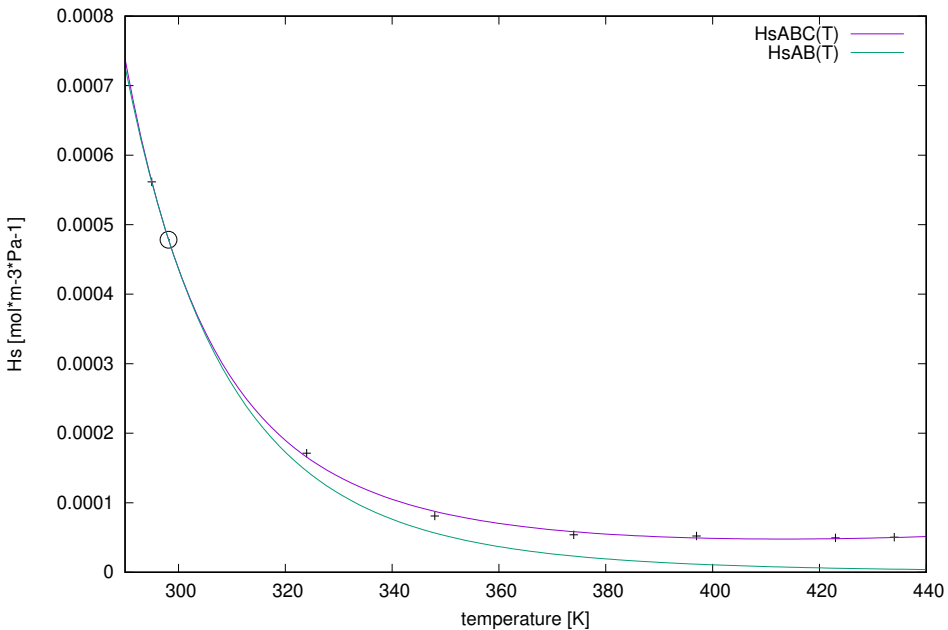

ref = 3692; chem = TCE trichloroethene; casrn = 79-01-6; r2 = 0.99972

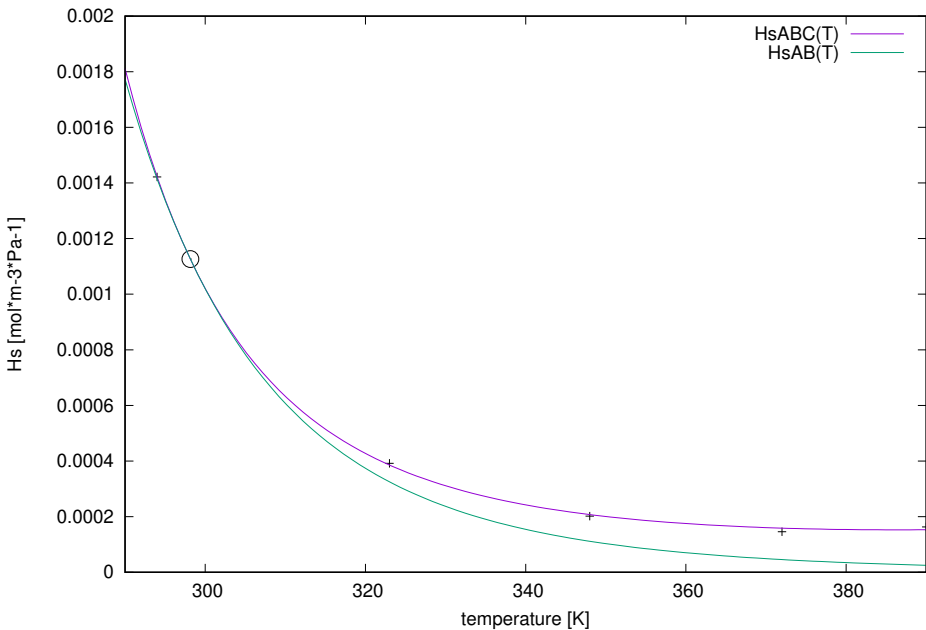

ref = 3693; chem = diisopropyl ether; casrn = 108-20-3; r2 = 0.99446

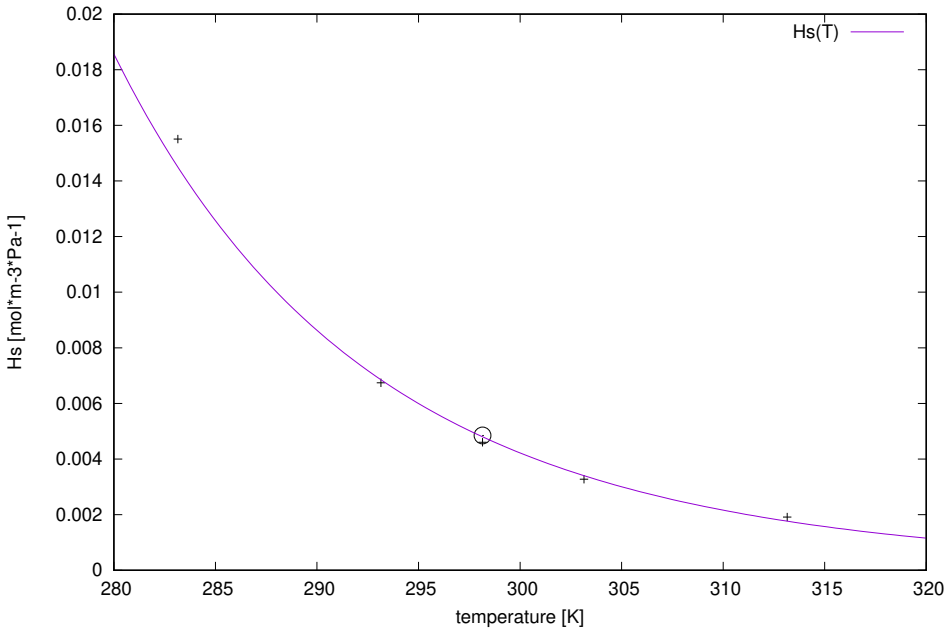

ref = 3693; chem = methyl tert-butyl ether; casrn = 1634-04-4; r2 = 0.98548

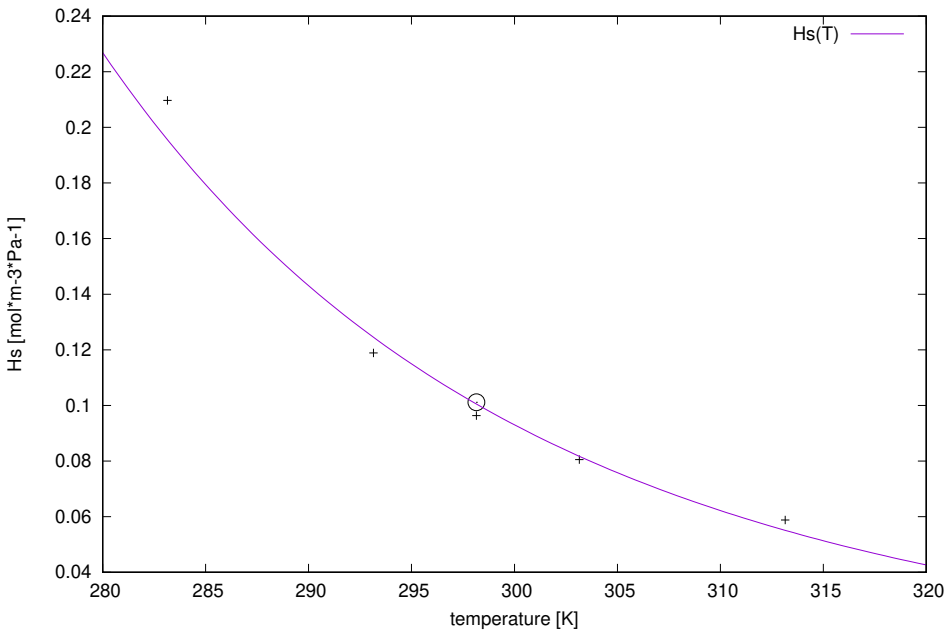

ref = 3693; chem = di(2,2,2-trifluoroethyl) ether; casrn = 333-36-8; r2 = 0.73557

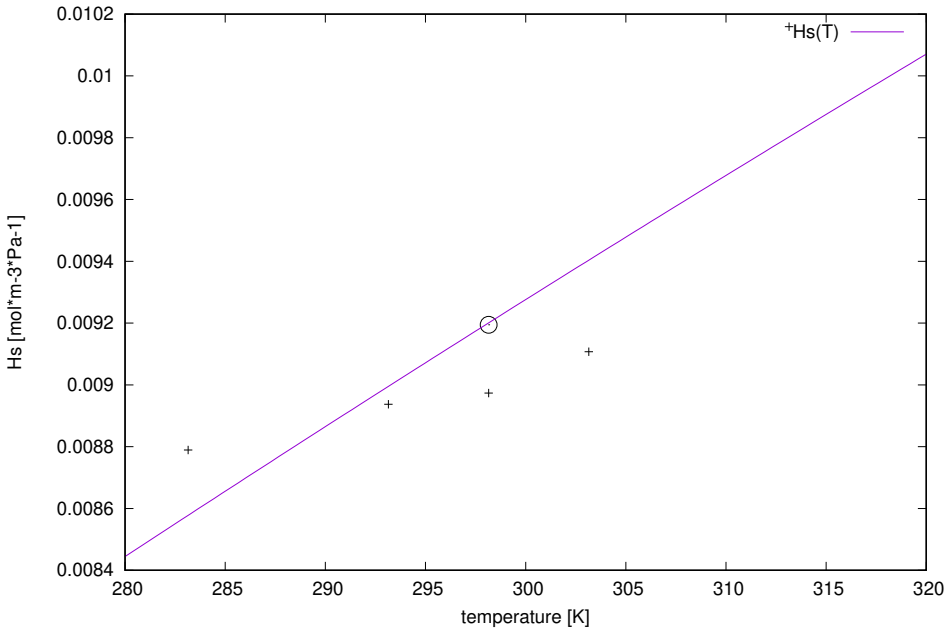

ref = 3693; chem = diethyl ether; casrn = 60-29-7; r2 = 0.99932

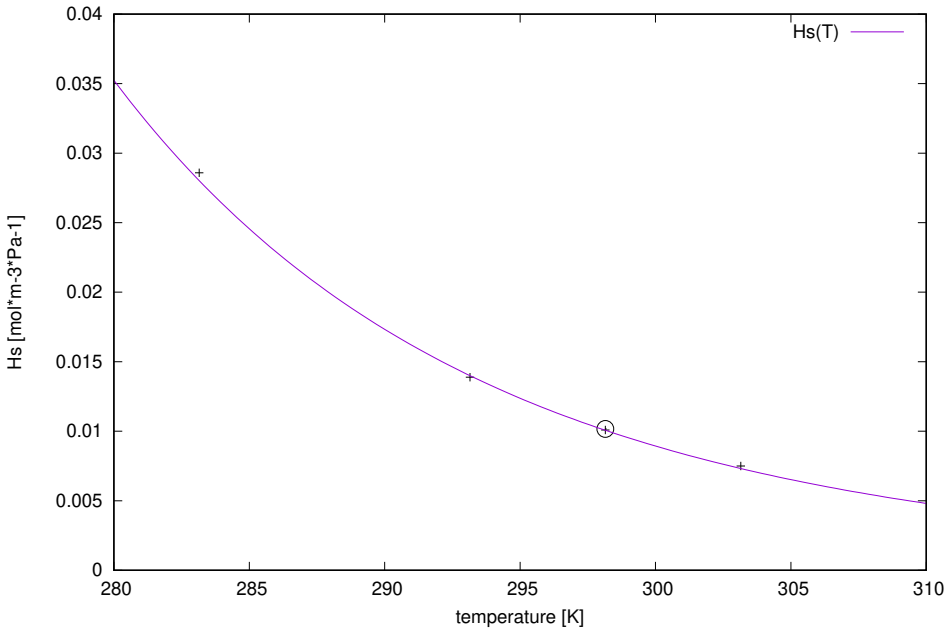

ref = 3693; chem = ethanol; casrn = 64-17-5; r2 = 0.99867

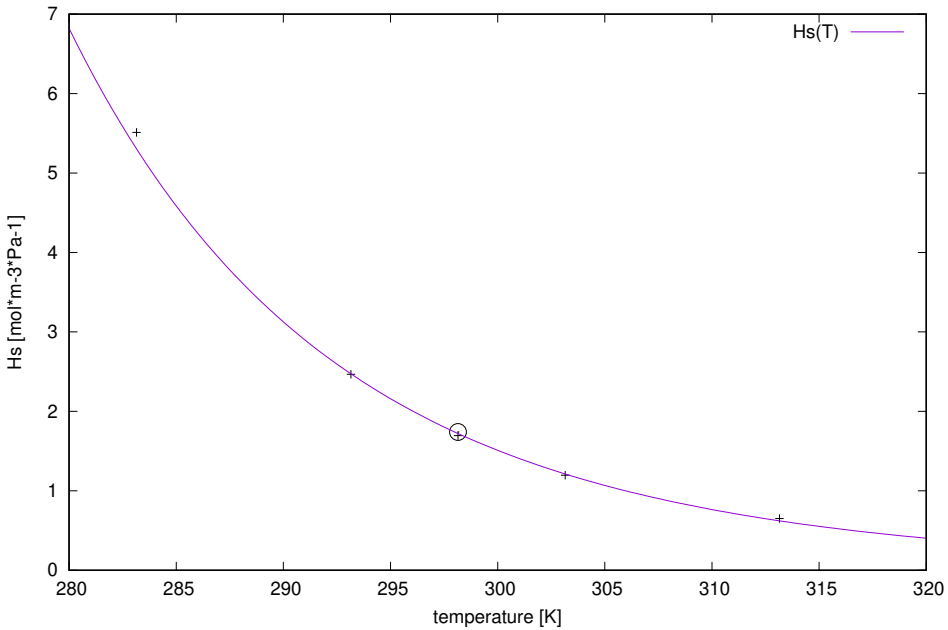

ref = 3693; chem = methanol; casrn = 67-56-1; r2 = 0.99605

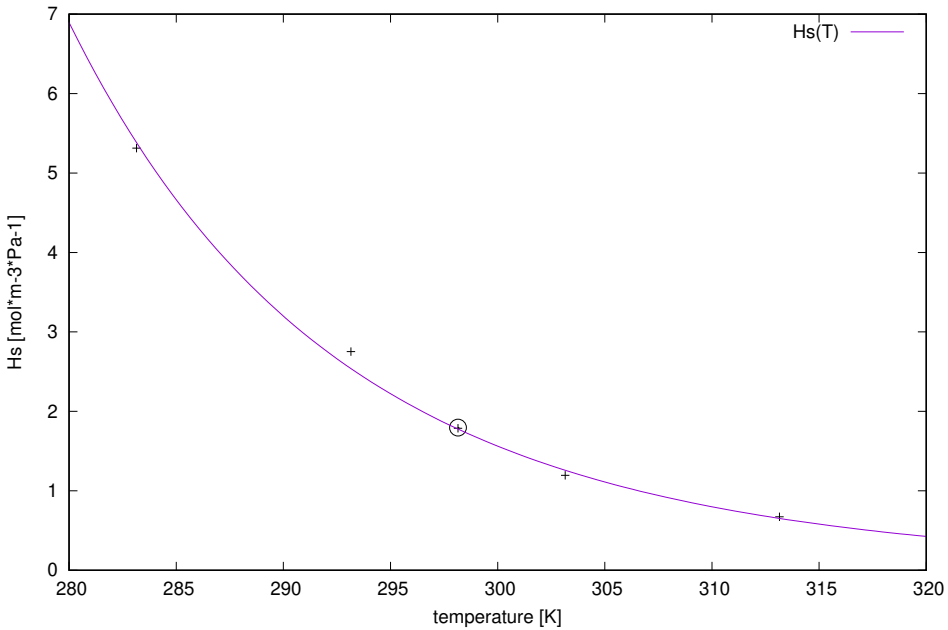



ref = 3693; chem = 2-propanol; casrn = 67-63-0; r2 = 0.99787

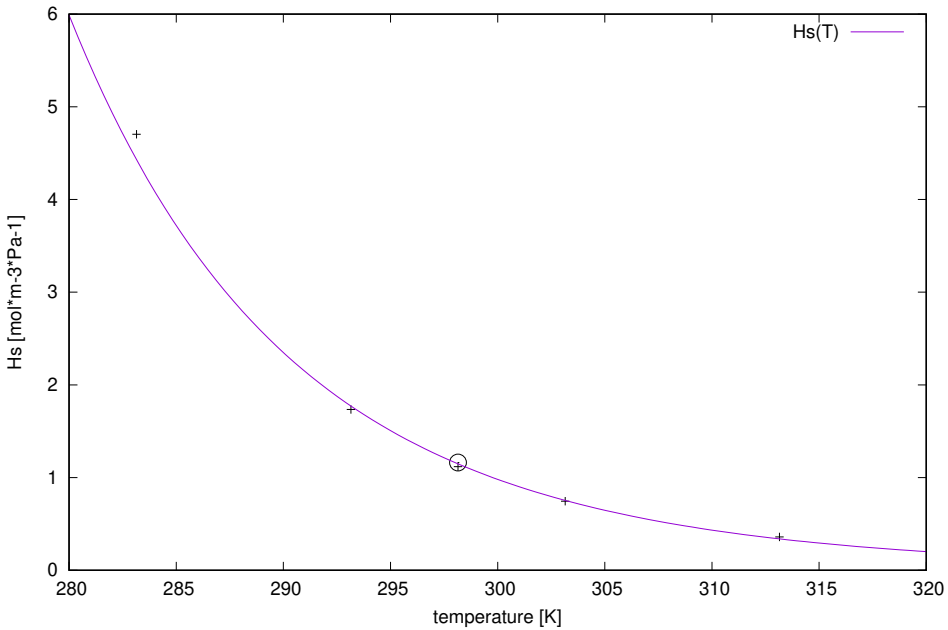

ref = 3693; chem = 1-propanol; casrn = 71-23-8; r2 = 0.99946

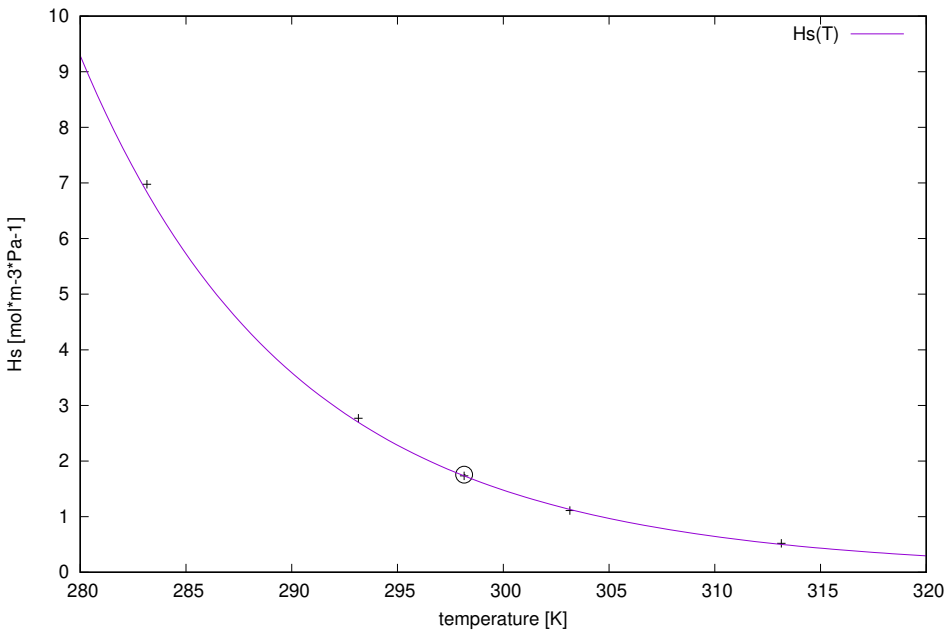

ref = 3694; chem = p-xylene; casrn = 106-42-3; r2 = 0.99946

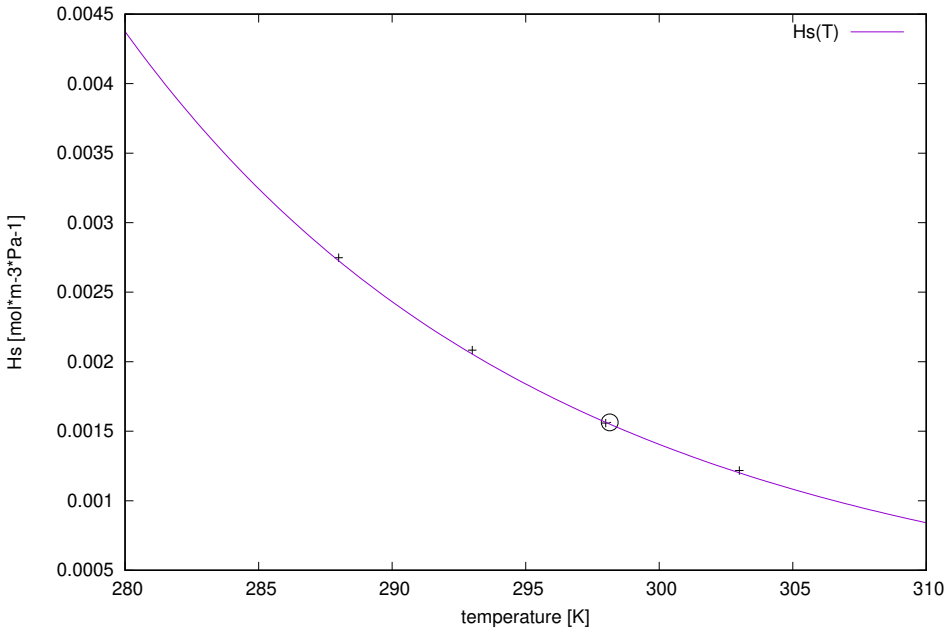

ref = 3694; chem = toluene; casrn = 108-88-3; r2 = 0.99844

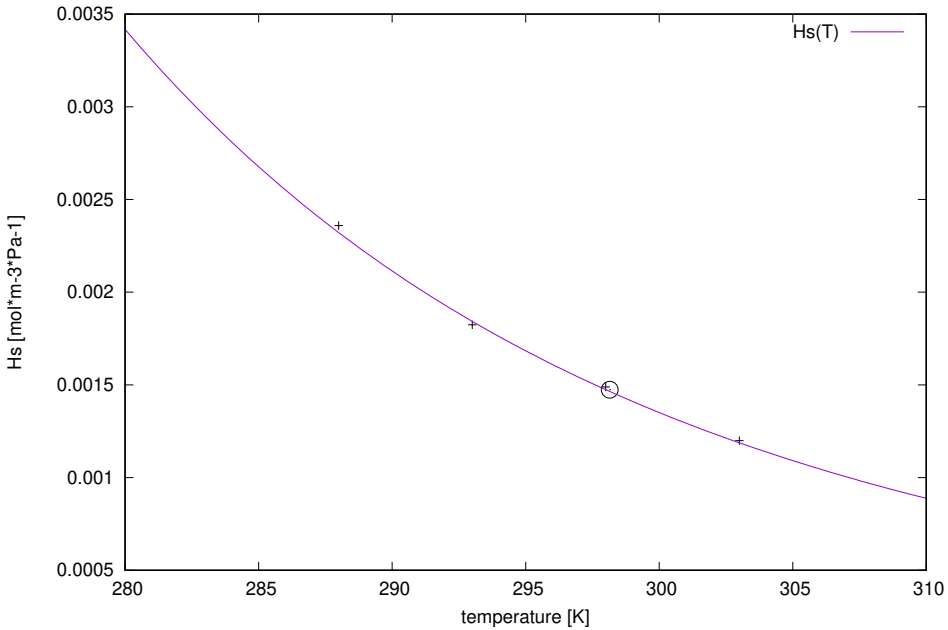

ref = 3694; chem = methanol; casrn = 67-56-1; r2 = 0.99927

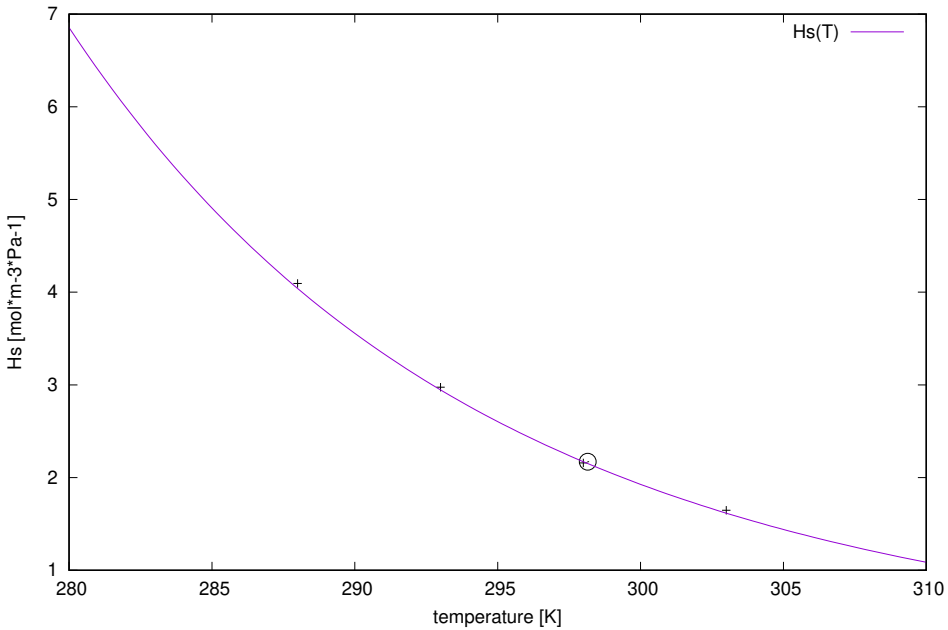

ref = 3694; chem = 2-propanol; casrn = 67-63-0; r2 = 0.99975

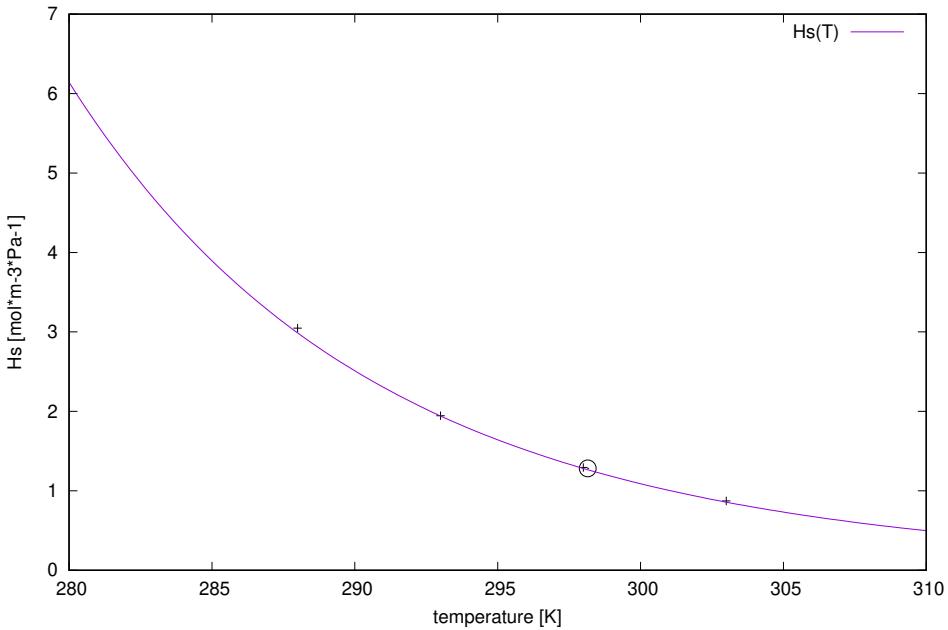

ref = 3697; chem = diethyl ether; casrn = 60-29-7; r2 = 0.99629

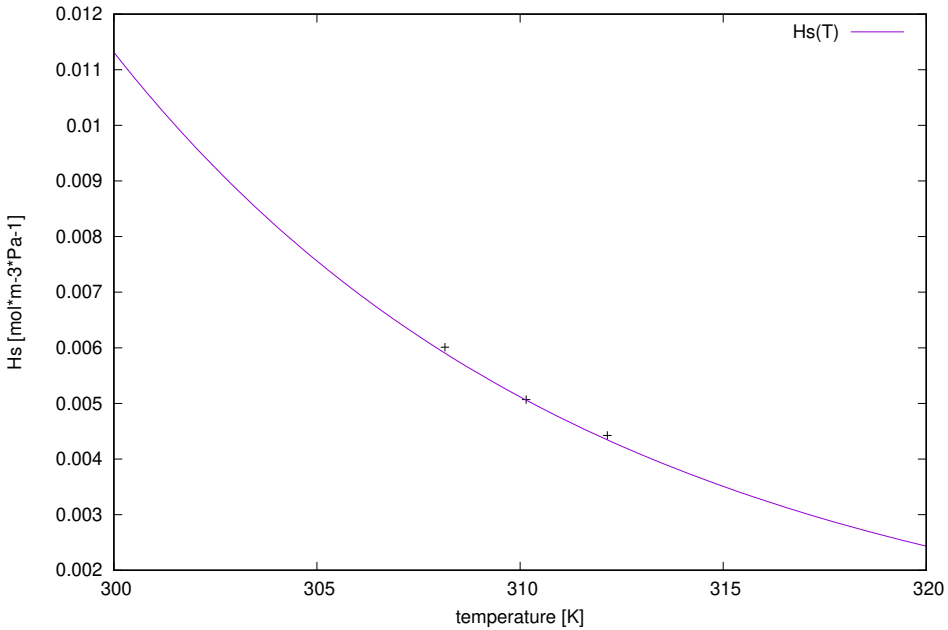

ref = 3701; chem = dinitrogen monoxide; casrn = 10024-97-2; r2 = 0.99814

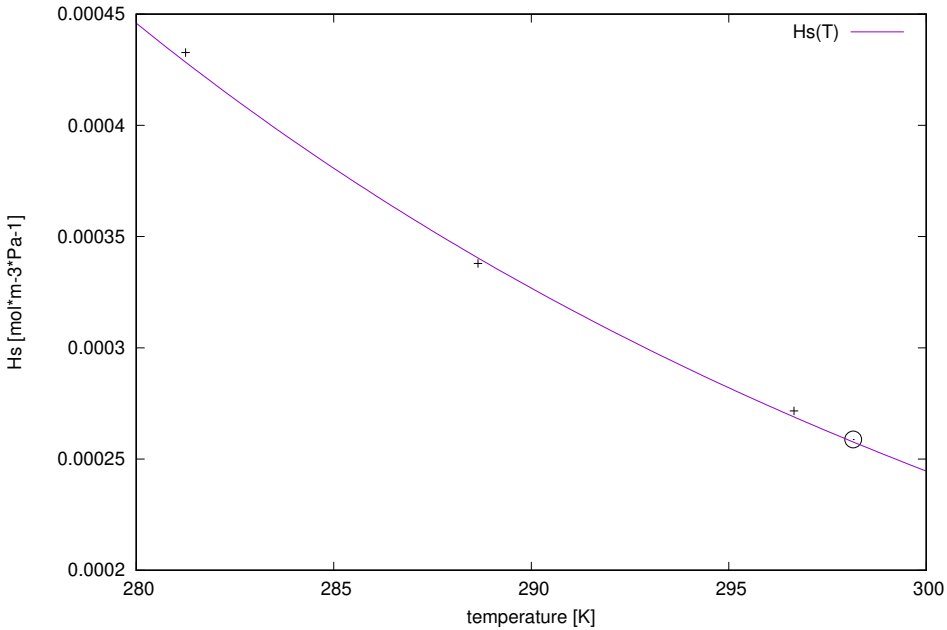



ref = 3701; chem = dinitrogen monoxide; casrn = 10024-97-2; r2 = 0.99829

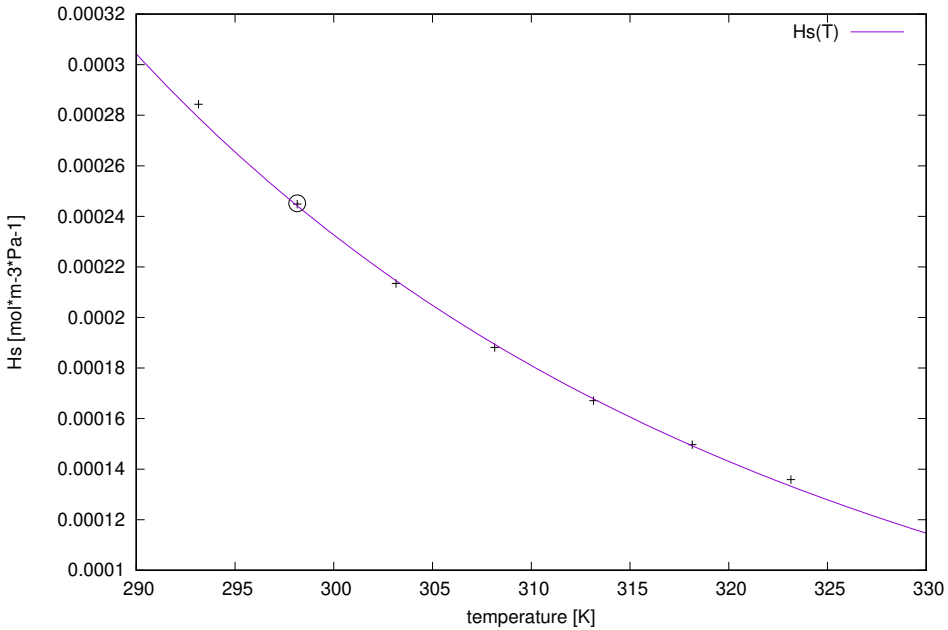

ref = 3704; chem = dinitrogen monoxide; casrn = 10024-97-2; r2 = 1.00000

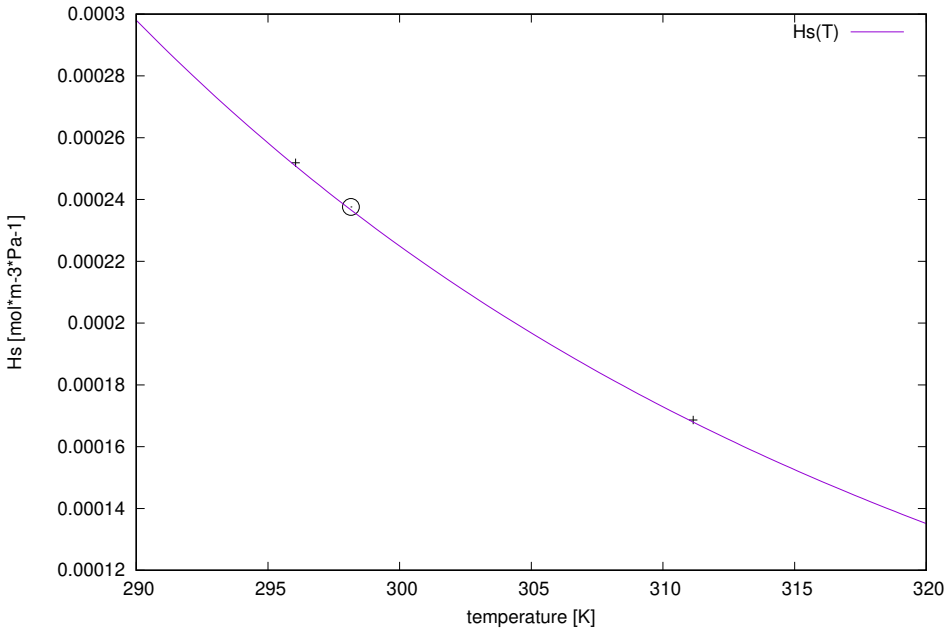

ref = 3707; chem = nitrogen; casrn = 7727-37-9; r2 = 1.00000

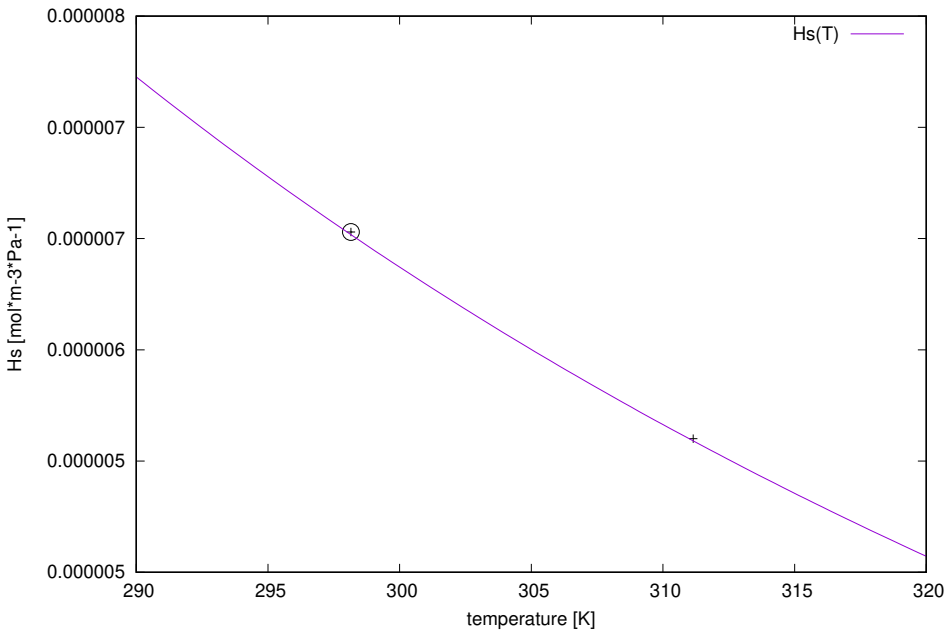

ref = 3708; chem = dinitrogen monoxide; casrn = 10024-97-2; r2 = 0.99734

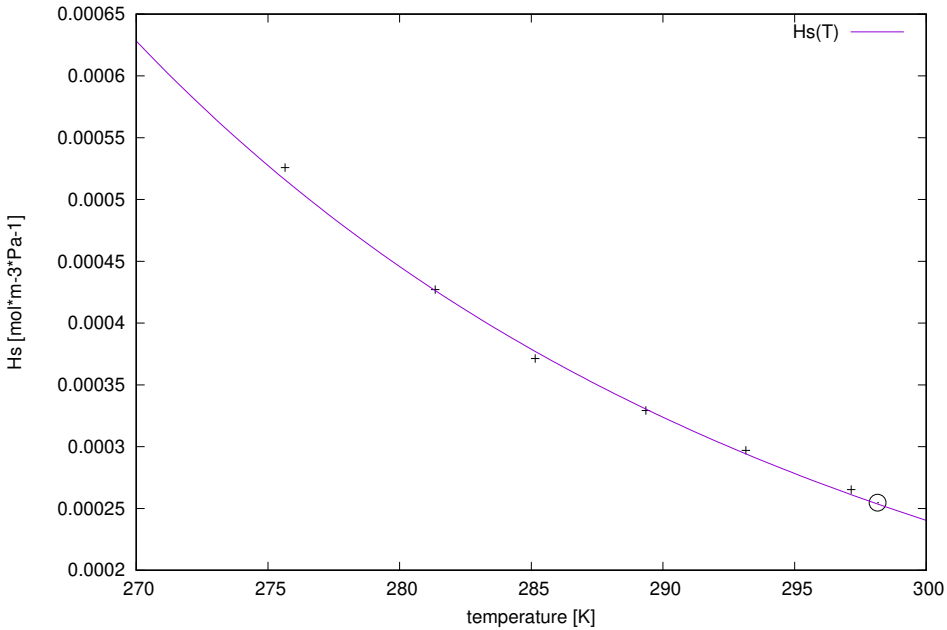

ref = 3709; chem = dinitrogen monoxide; casrn = 10024-97-2; r2 = 0.99445

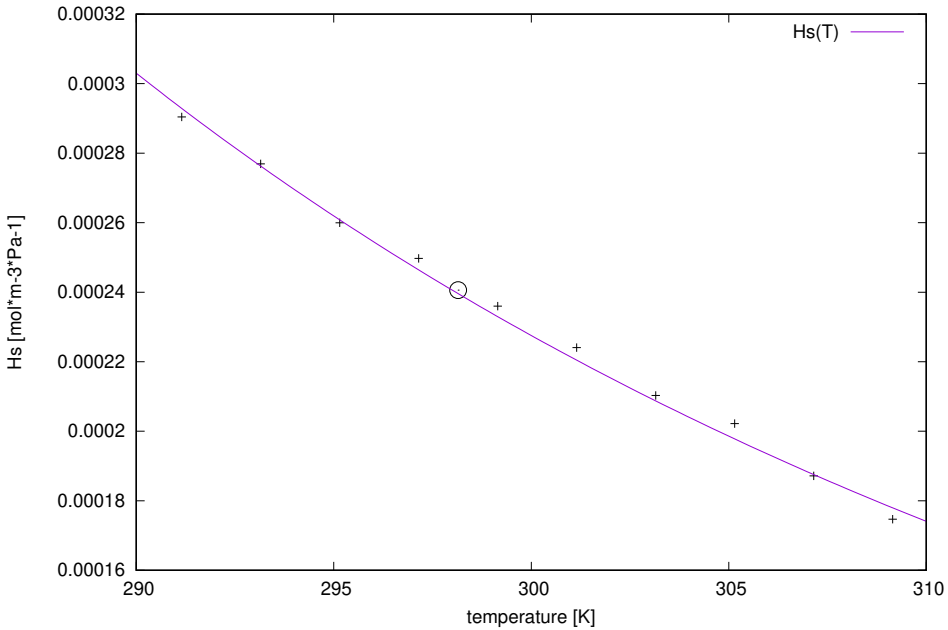

ref = 3709; chem = carbon dioxide; casrn = 124-38-9; r2 = 0.99499

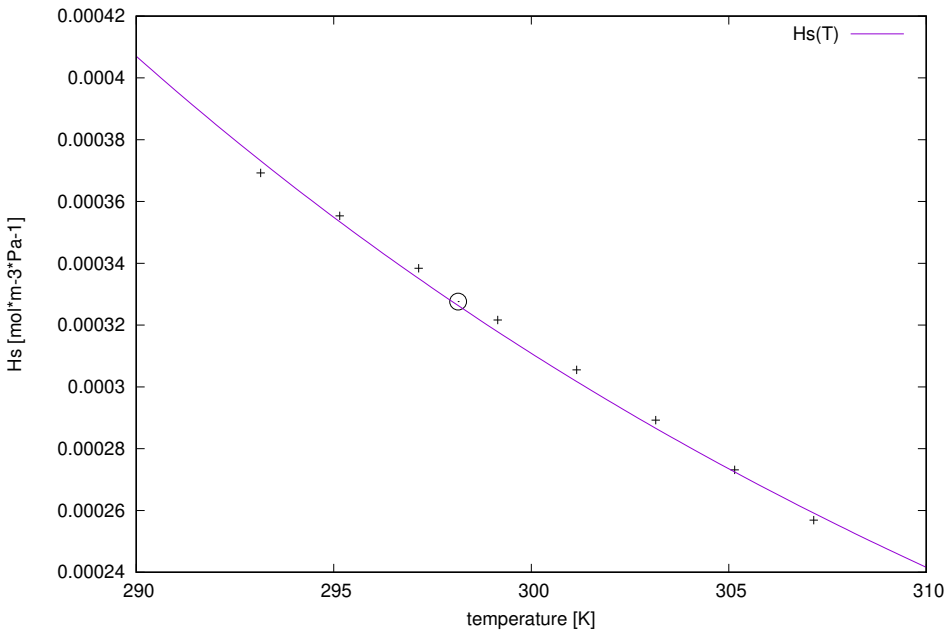

ref = 3710; chem = dinitrogen monoxide; casrn = 10024-97-2; r2 = 0.99778

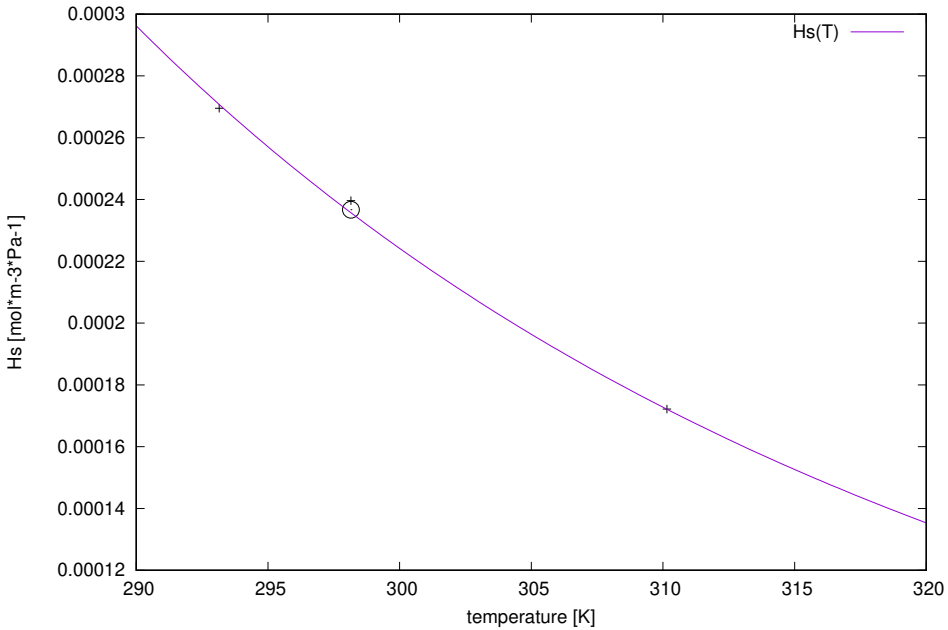

ref = 3710; chem = cyclopropane; casrn = 75-19-4; r2 = 0.98288

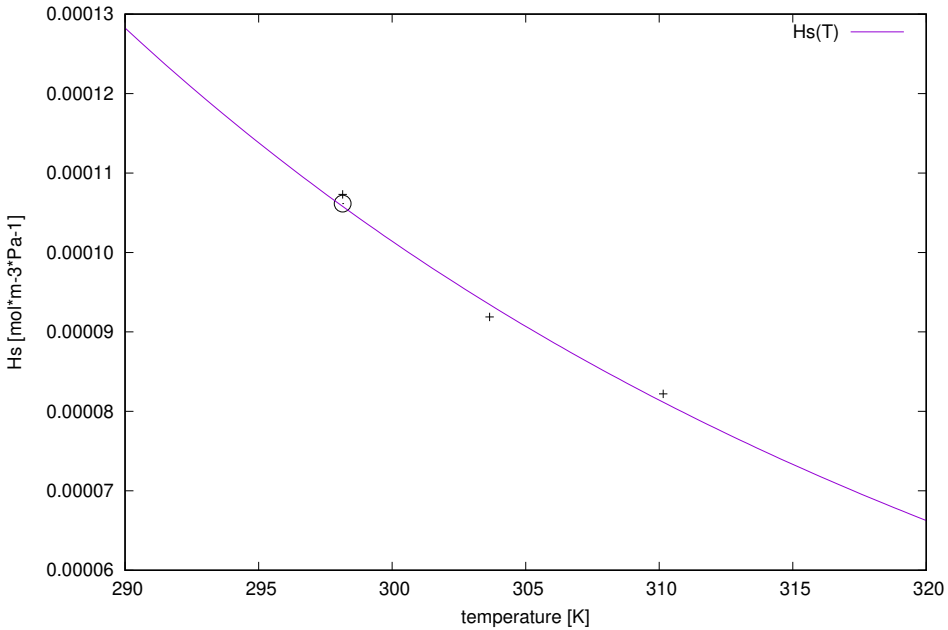



ref = 3711; chem = dinitrogen monoxide; casrn = 10024-97-2; r2 = 0.99956

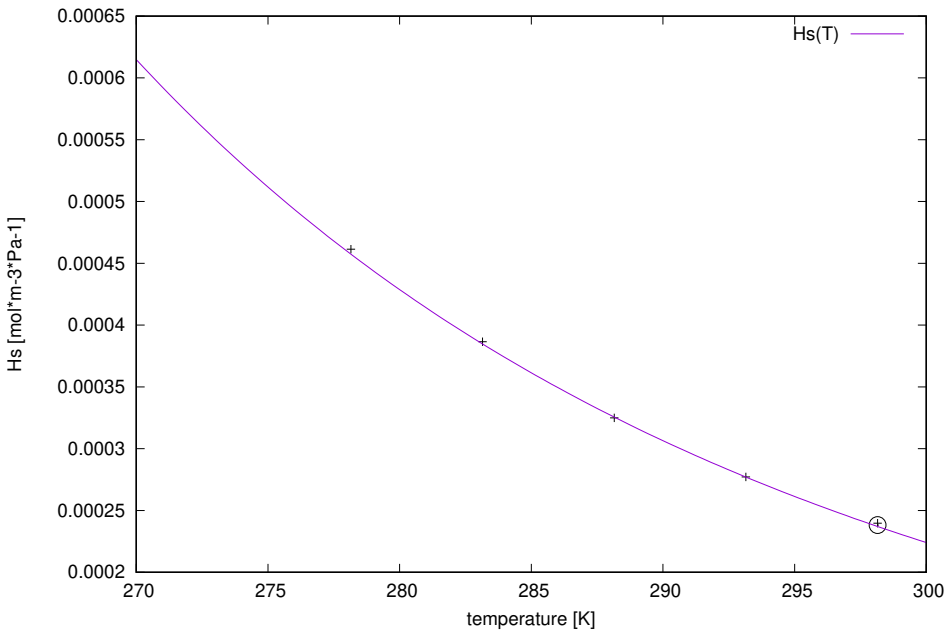

ref = 3711; chem = carbon dioxide; casrn = 124-38-9; r2 = 1.00000

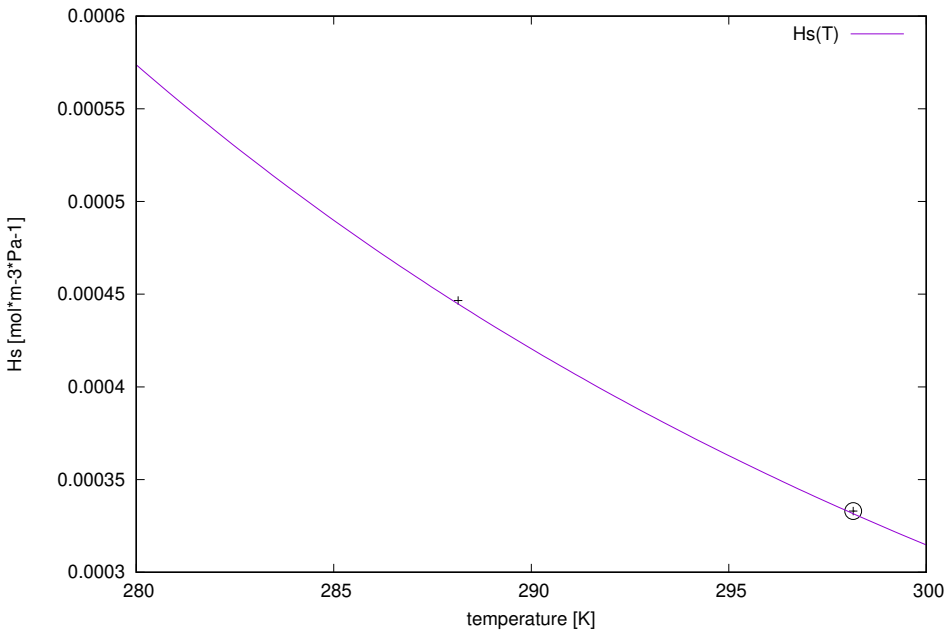

ref = 3711; chem = hydrogen; casrn = 1333-74-0; r2 = 1.00000

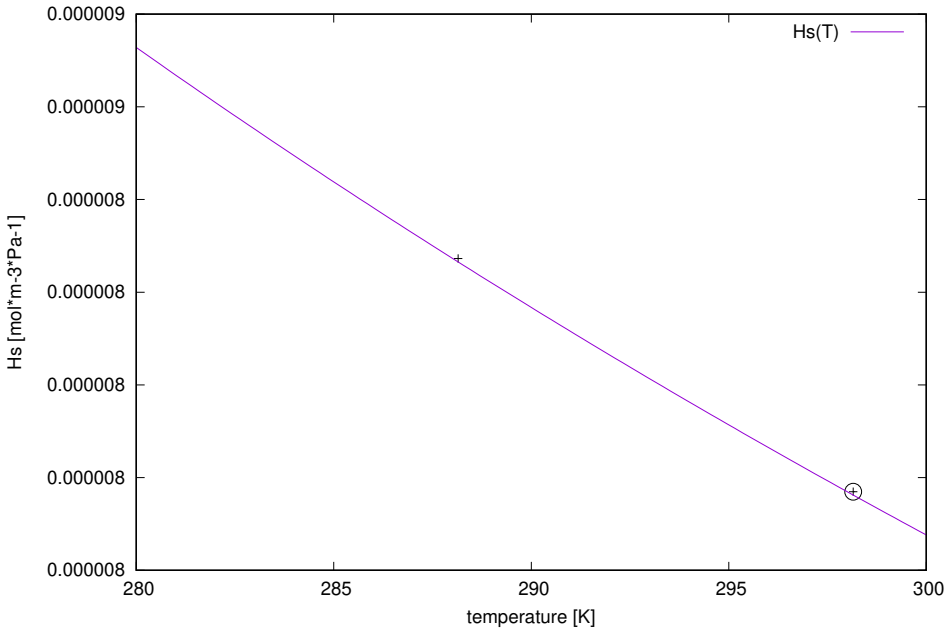

ref = 3711; chem = oxygen; casrn = 7782-44-7; r2 = 1.00000

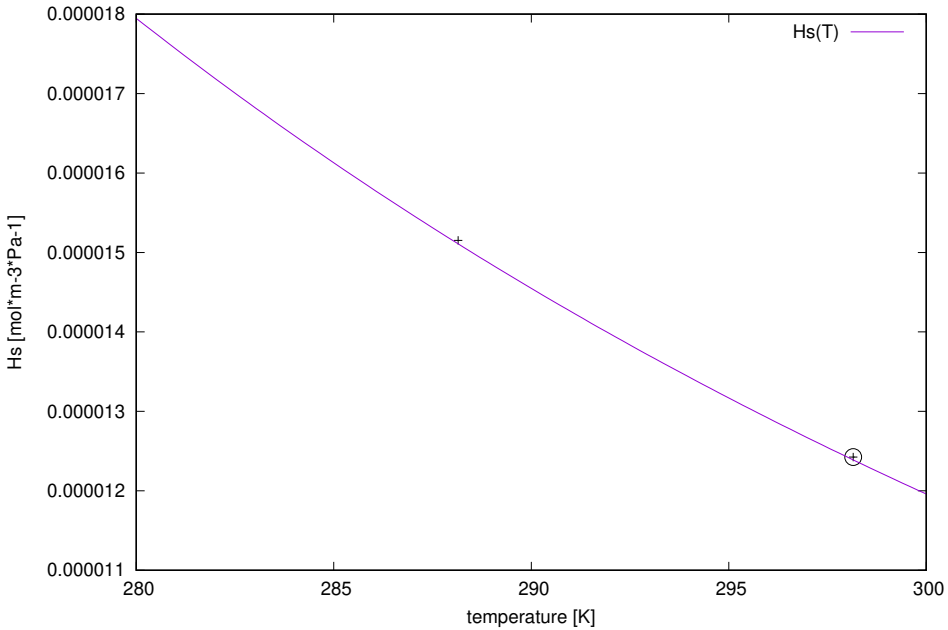

ref = 3712; chem = hydrogen; casrn = 1333-74-0; r2 = 0.99181

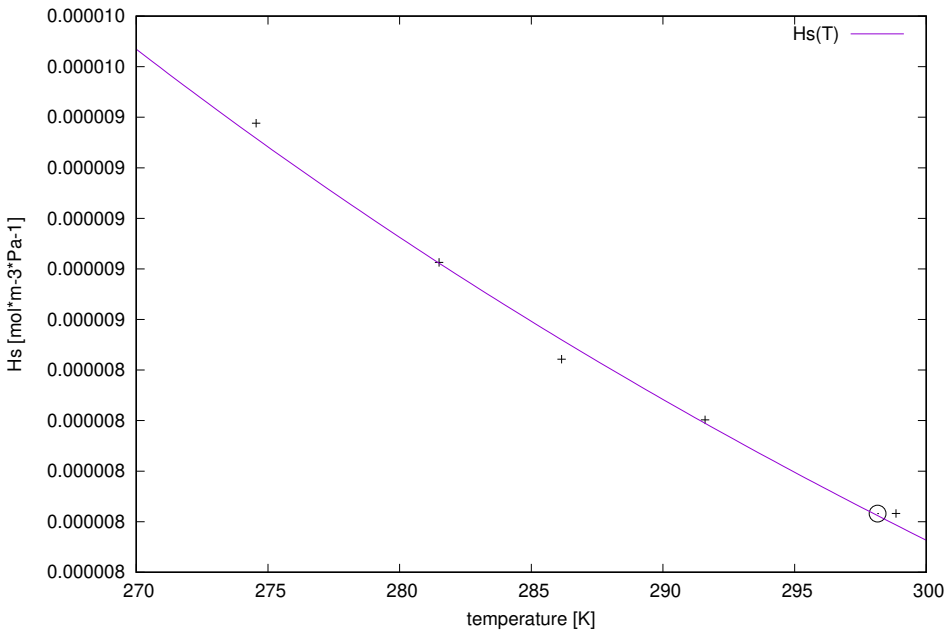

ref = 3712; chem = oxygen; casrn = 7782-44-7; r2 = 1.00000

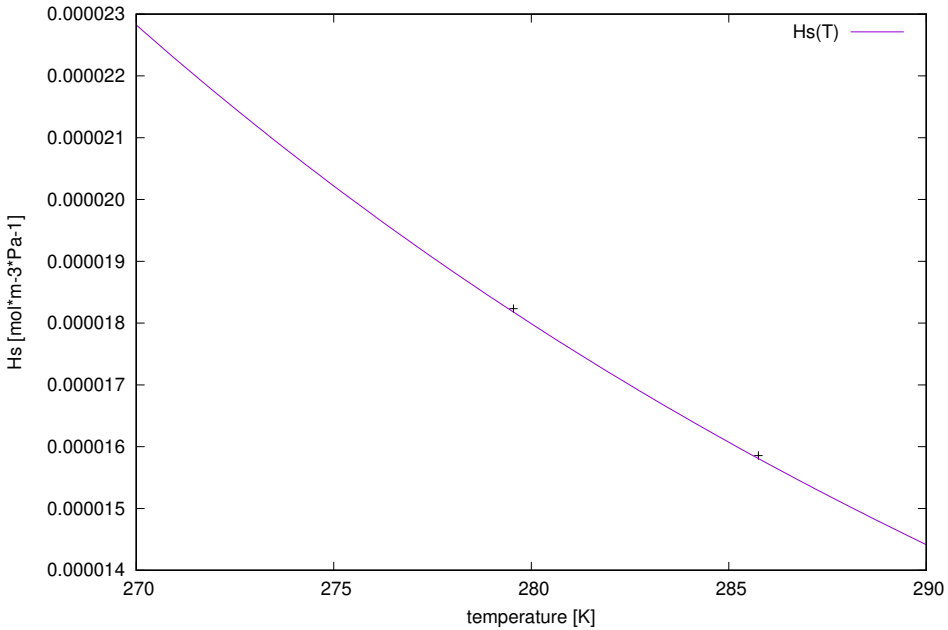

ref = 3713; chem = hydrogen; casrn = 1333-74-0; r2 = 0.93544

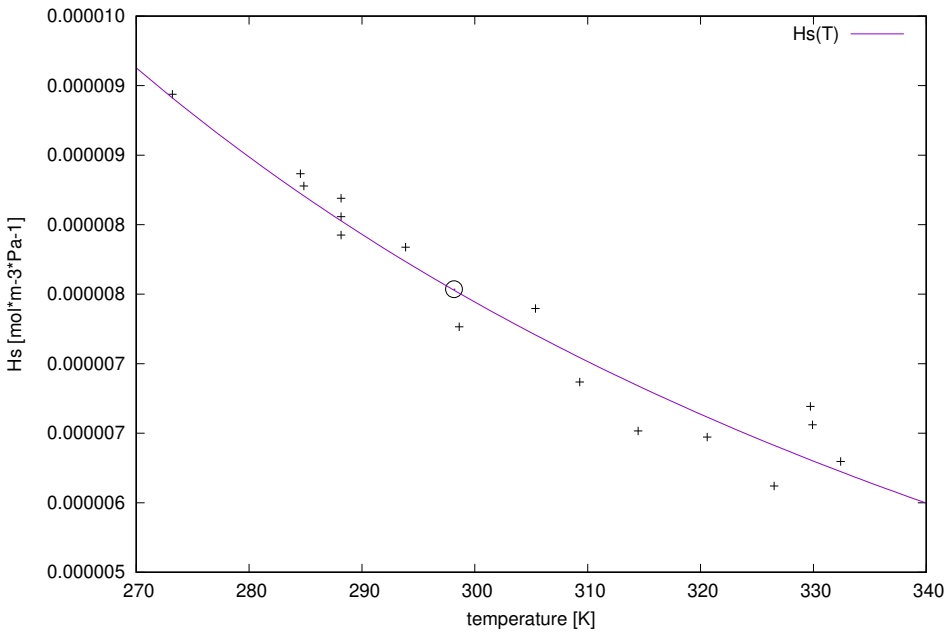

ref = 3713; chem = nitrogen; casrn = 7727-37-9; r2 = 0.98265

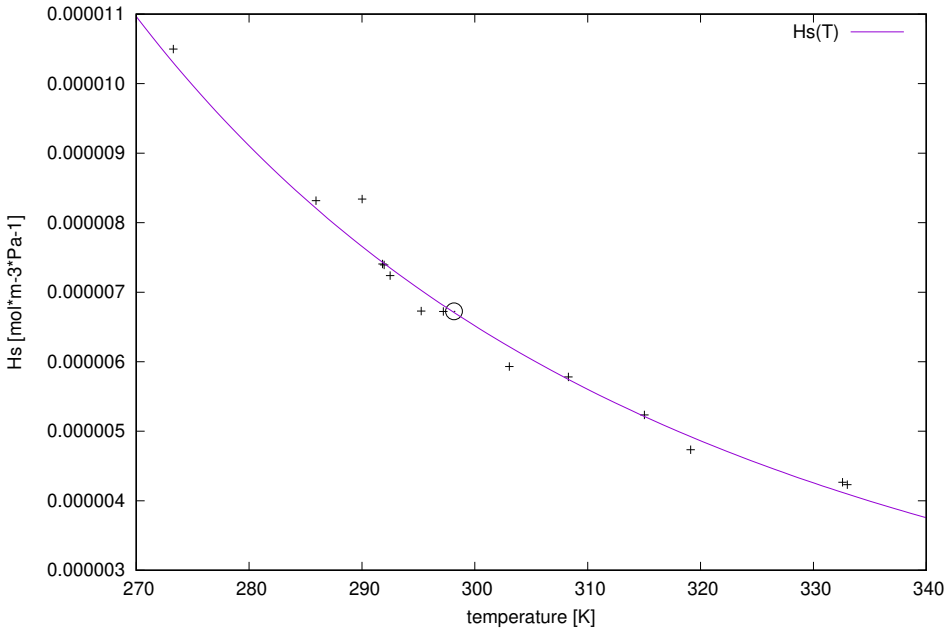



ref = 3713; chem = oxygen; casrn = 7782-44-7; r2 = 0.99043

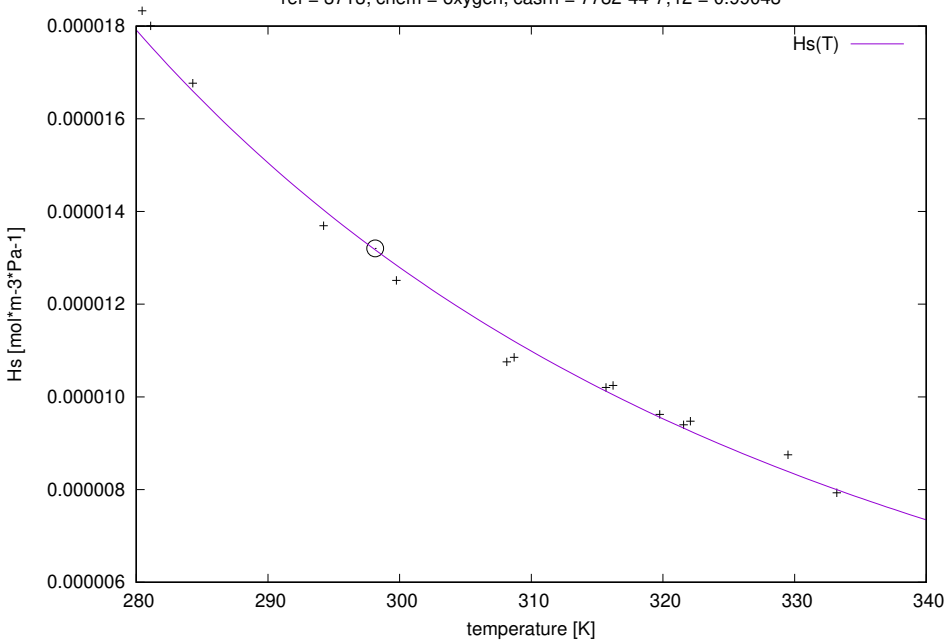

ref = 3714; chem = krypton; casrn = 7439-90-9; r2 = 0.93072

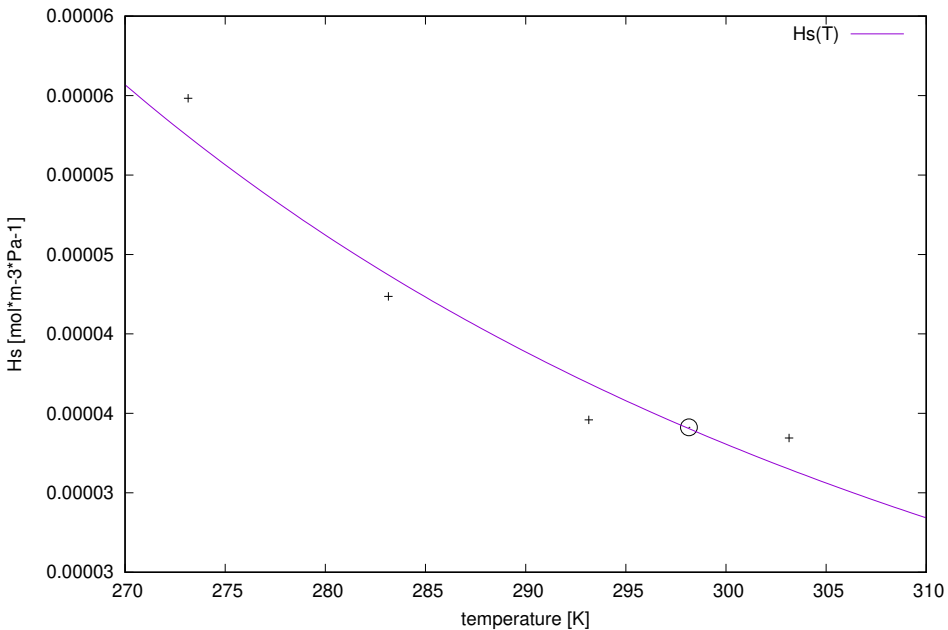

ref = 3714; chem = krypton; casrn = 7439-90-9; r2 = 0.97860

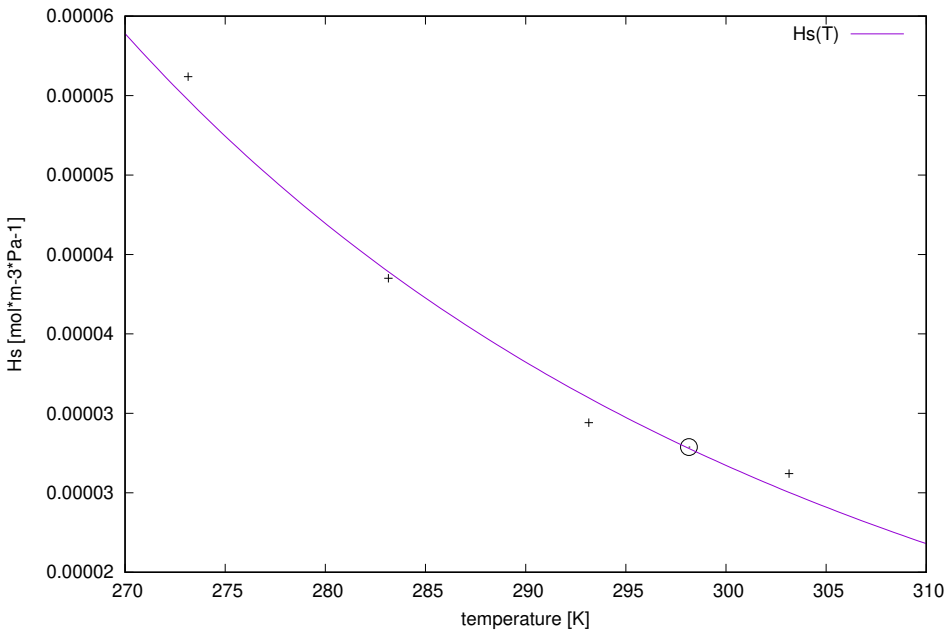

ref = 3714; chem = neon; casrn = 7440-01-9; r2 = 0.91892

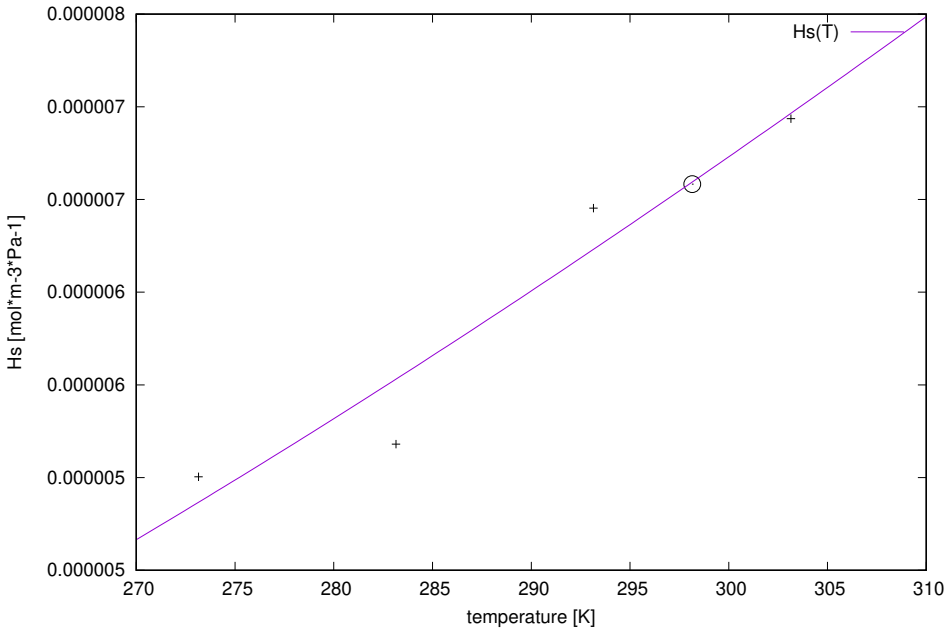

ref = 3714; chem = argon; casrn = 7440-37-1; r2 = 0.96182

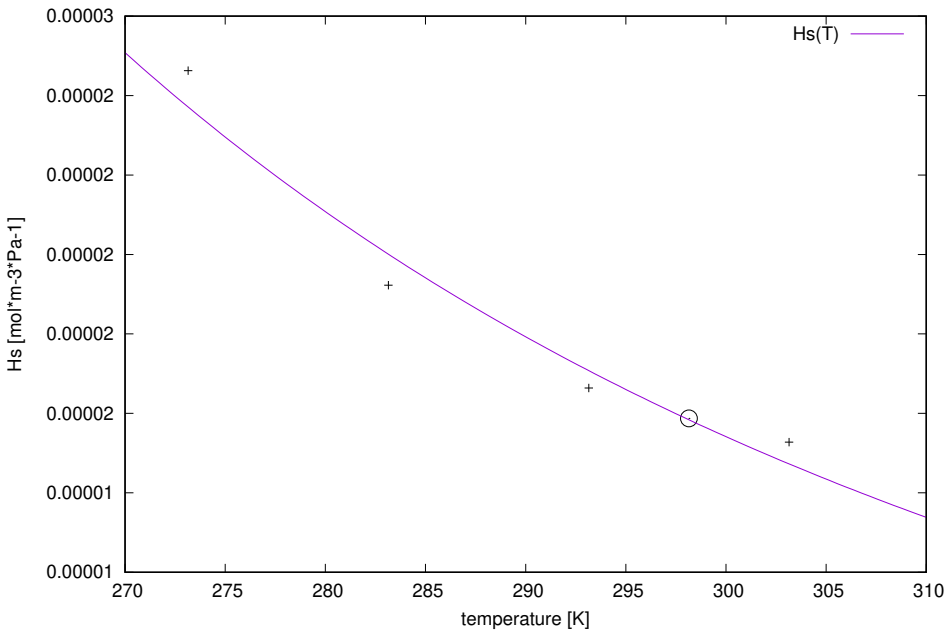

ref = 3714; chem = helium; casrn = 7440-59-7; r2 = 0.29795 +

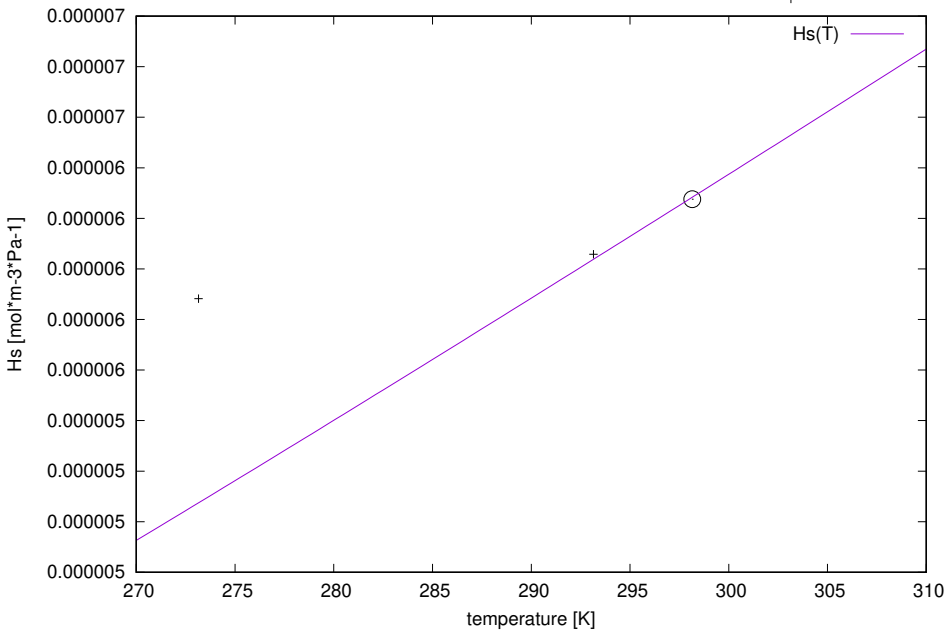

ref = 3714; chem = xenon; casrn = 7440-63-3; r2 = 0.99083

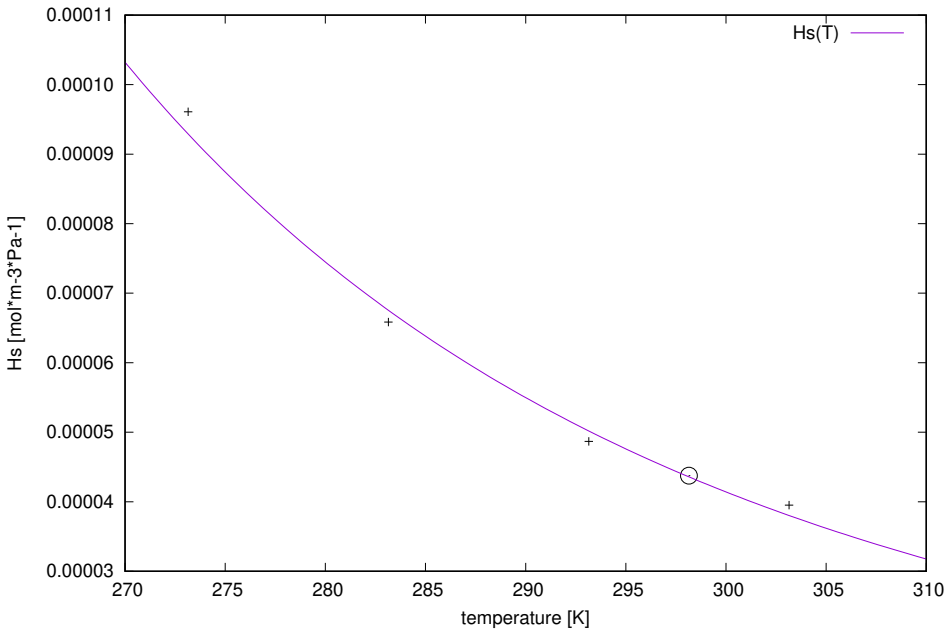

ref = 3716; chem = nitrogen; casrn = 7727-37-9; r2 = 1.00000

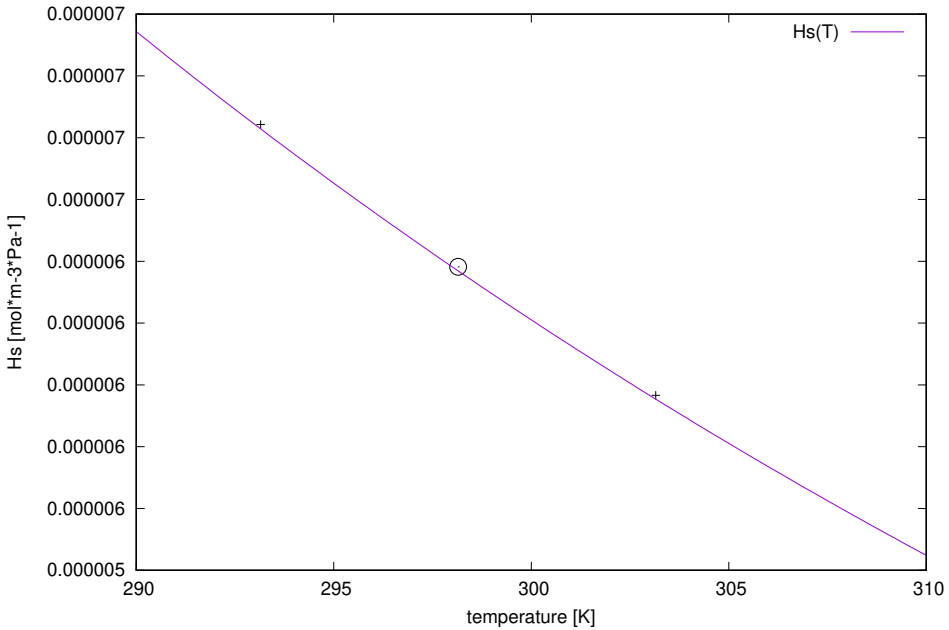



ref = 3716; chem = oxygen; casrn = 7782-44-7; r2 = 1.00000

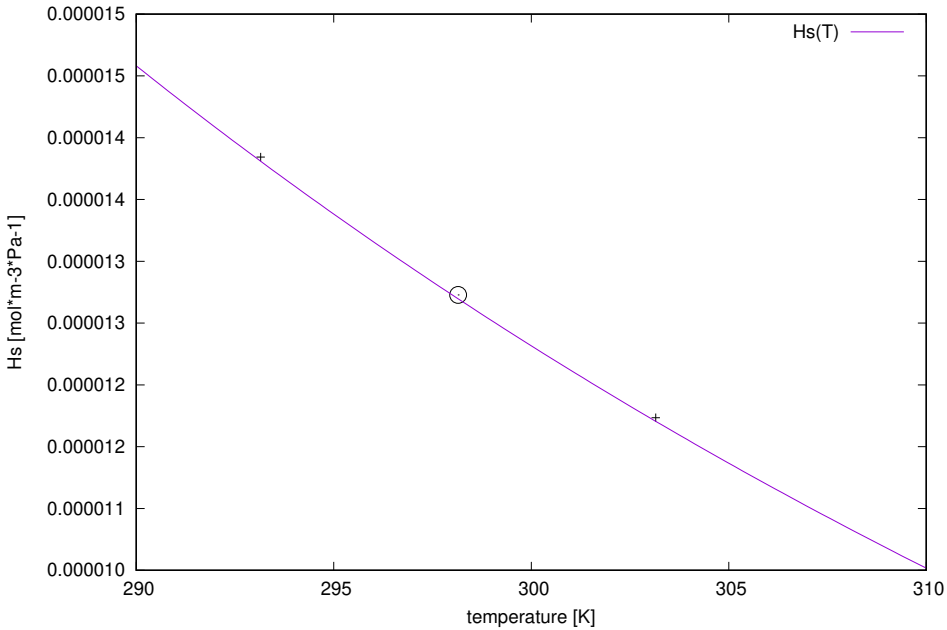

ref = 3717; chem = carbon dioxide; casrn = 124-38-9; r2 = 0.98586

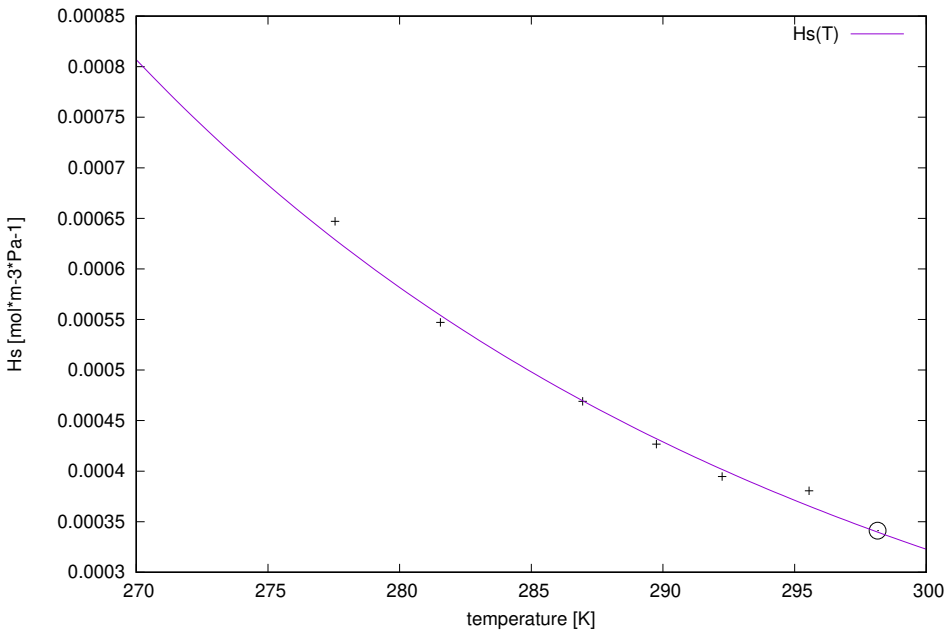

ref = 3717; chem = hydrogen; casrn = 1333-74-0; r2 = 0.00203

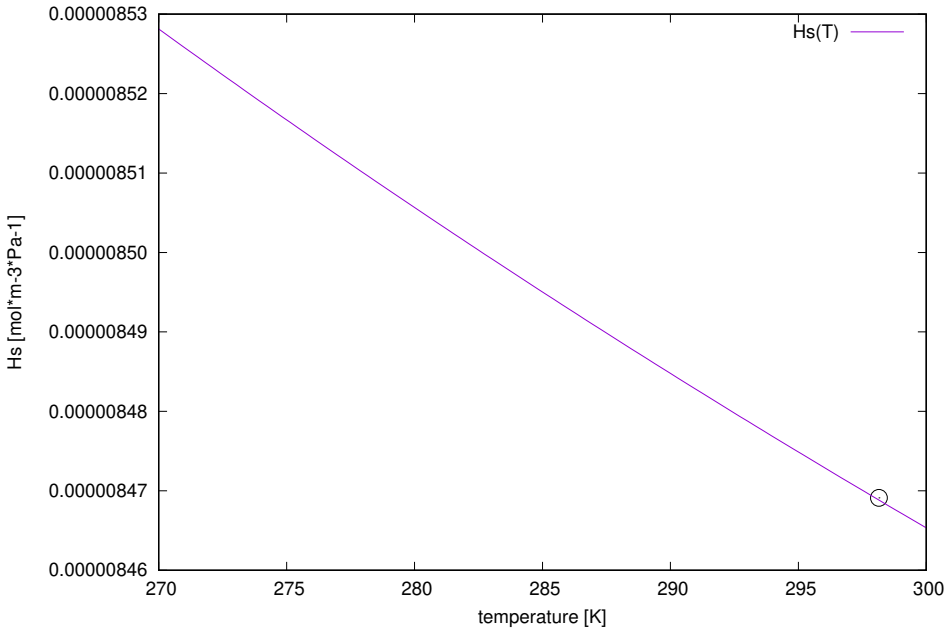

ref = 3717; chem = carbon monoxide; casrn = 630-08-0; r2 = 0.97966

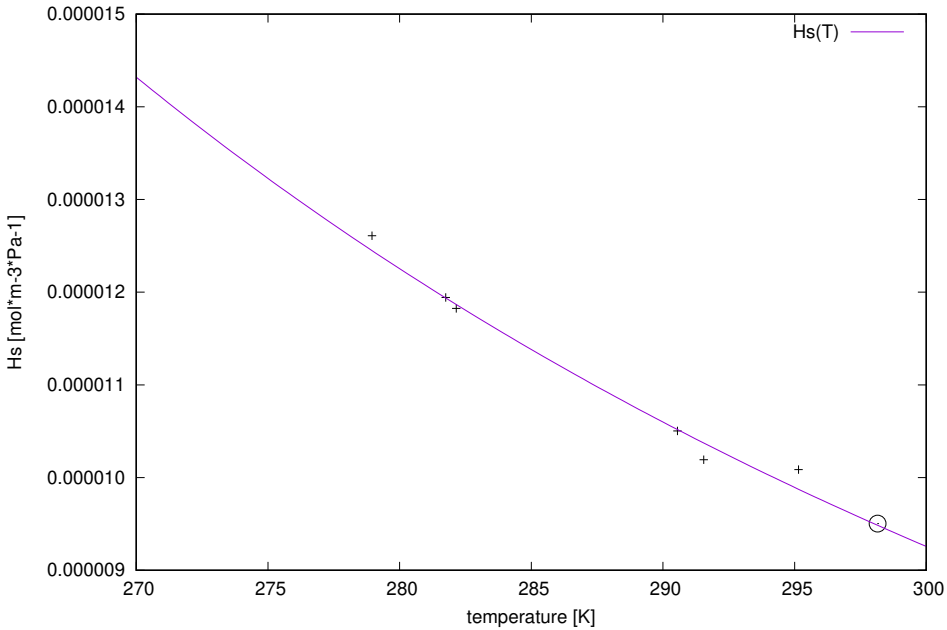

ref = 3717; chem = nitrogen; casrn = 7727-37-9; r2 = 0.94261

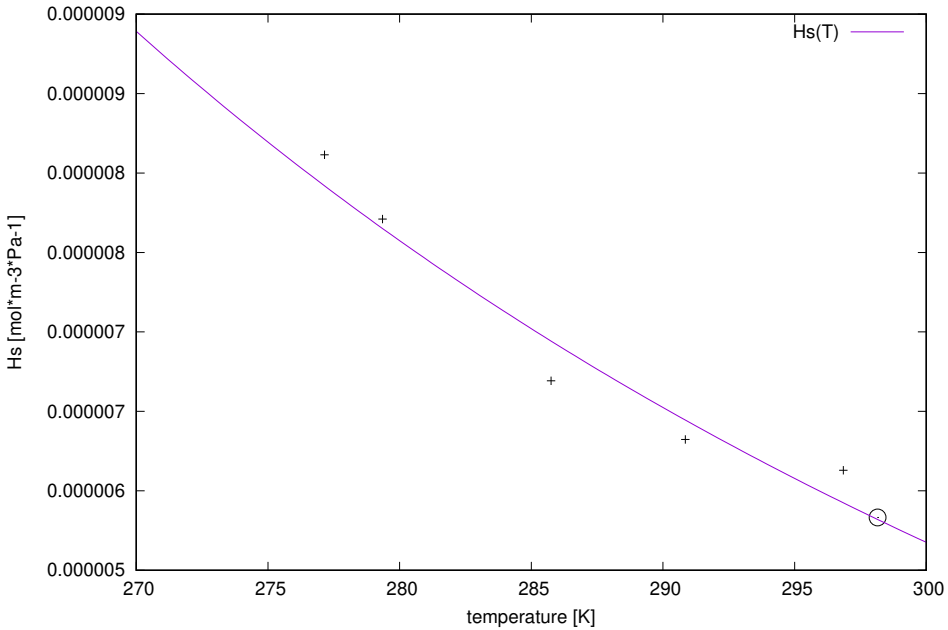

ref = 3718; chem = carbon oxide sulfide; casrn = 463-58-1; r2 = 0.99804

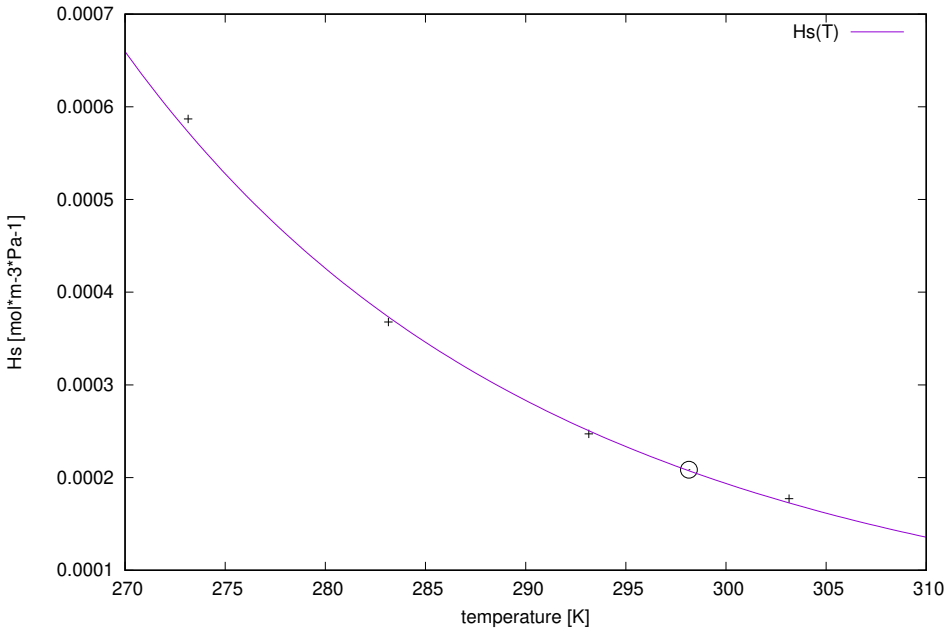

ref = 3718; chem = hydrogen sulfide; casrn = 7783-06-4; r2 = 0.99907

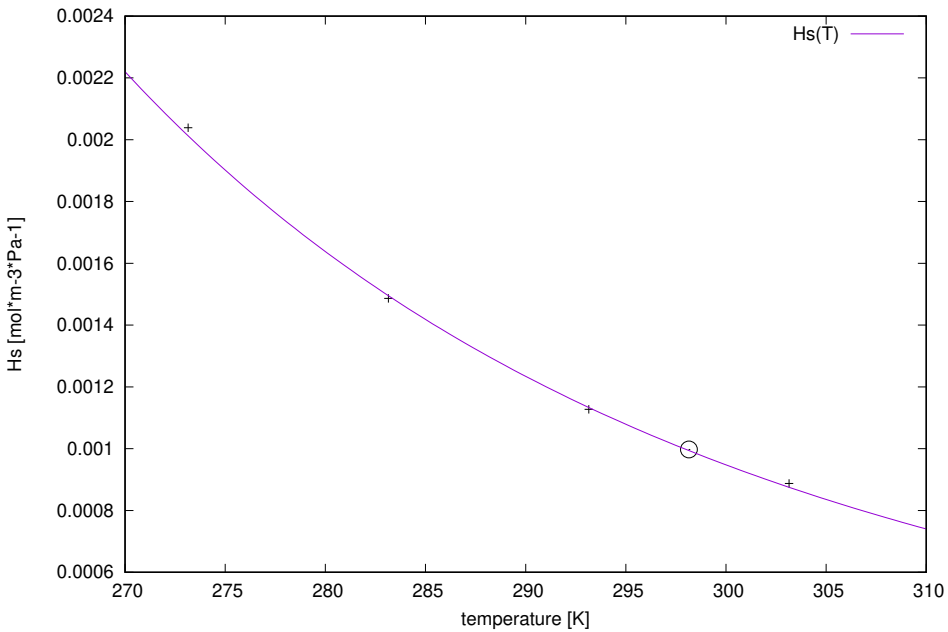

ref = 3719; chem = 2-ethyl-1-hexanol; casrn = 104-76-7; r2 = 0.99971

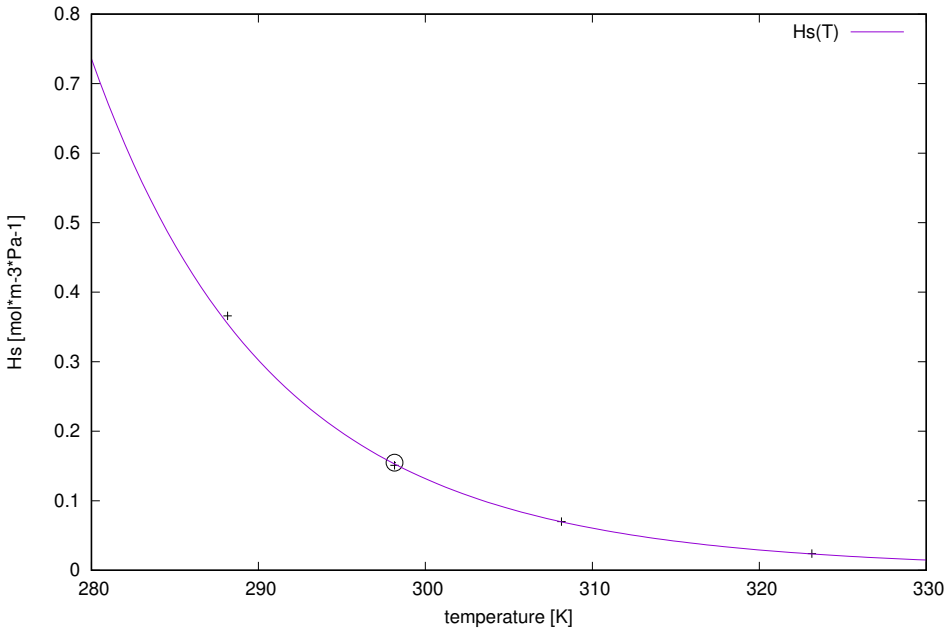



ref = 3719; chem = 3-octanone; casrn = 106-68-3; r2 = 0.99966

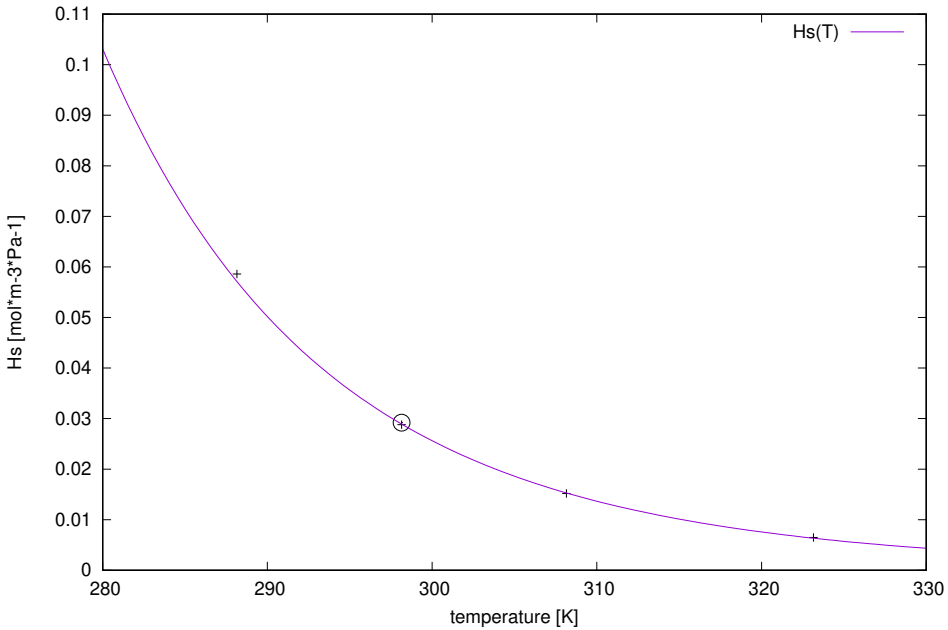

ref = 3719; chem = 1-octanol; casrn = 111-87-5; r2 = 0.99937

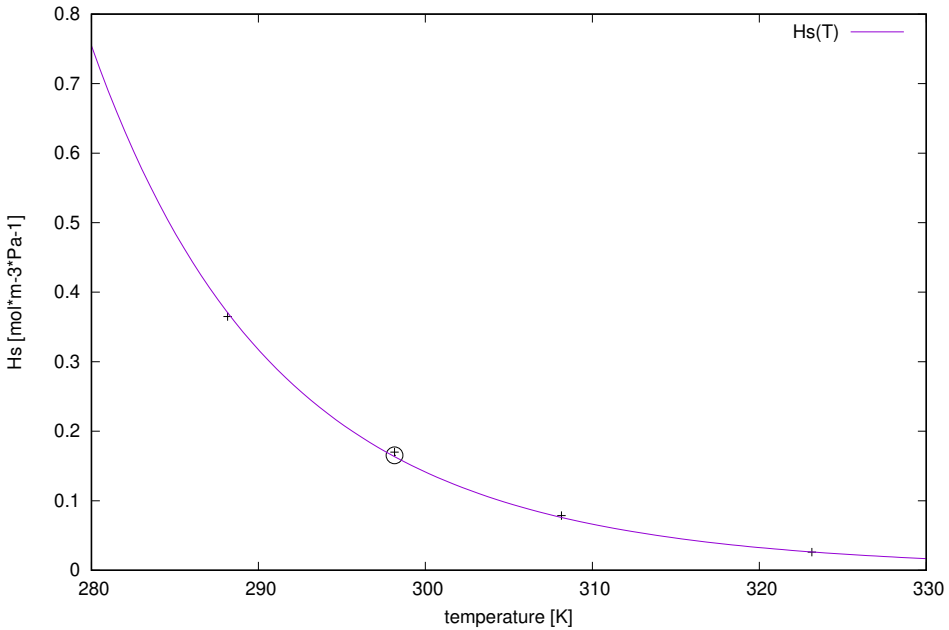

ref = 3719; chem = 1-octen-3-ol; casrn = 3391-86-4; r2 = 0.99545

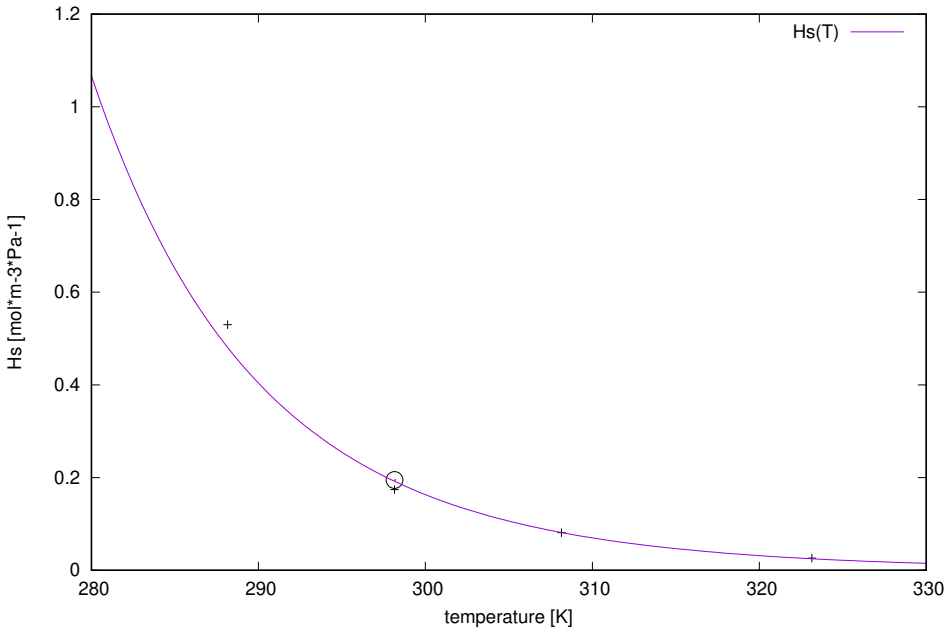

ref = 3719; chem = 3-octanol; casrn = 589-98-0; r2 = 0.98395

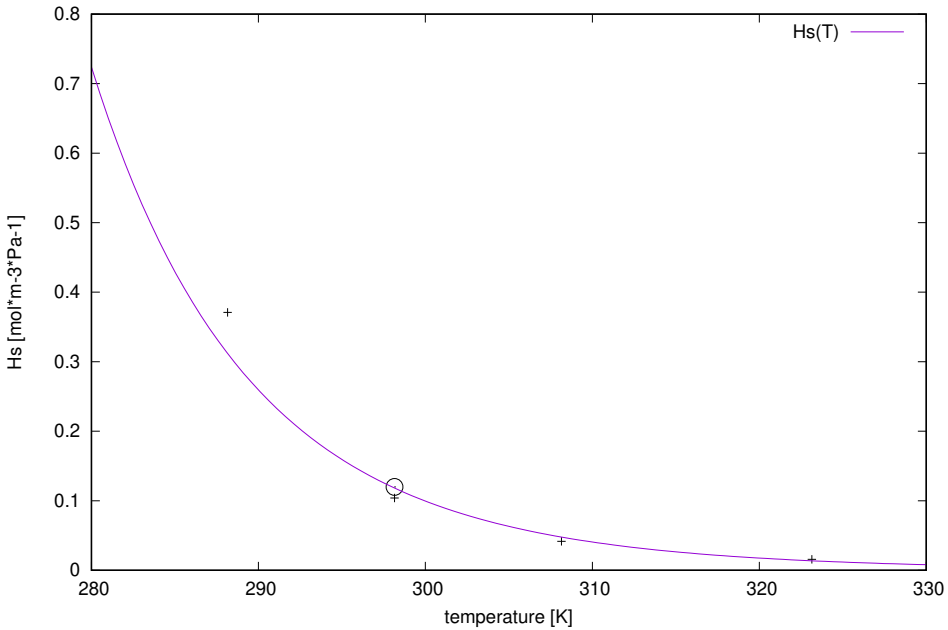

ref = 3719; chem = 1-butanol; casrn = 71-36-3; r2 = 0.99808

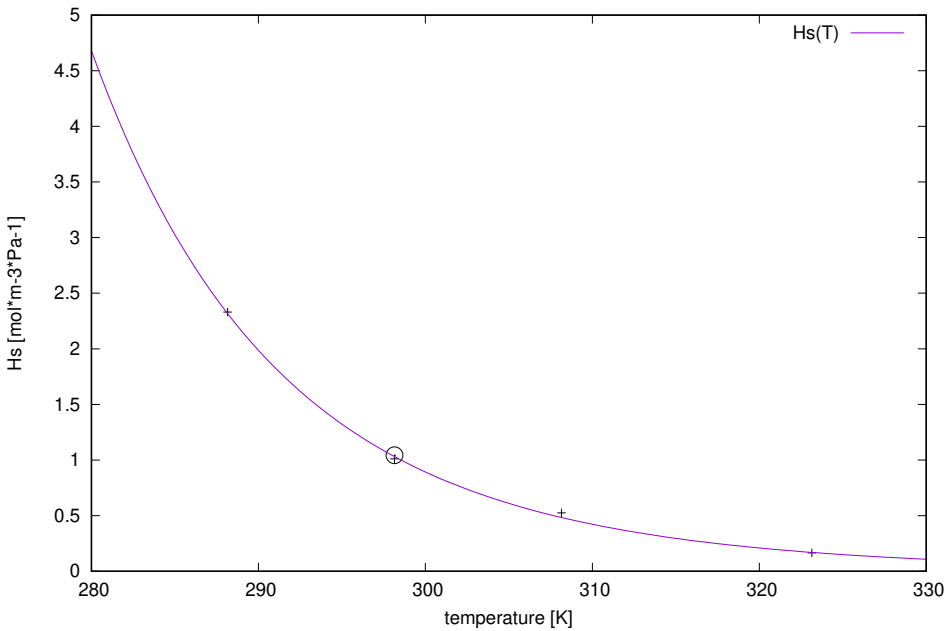

ref = 3719; chem = 2,4,6-trichloroanisole; casrn = 87-40-1; r2 = 0.98719

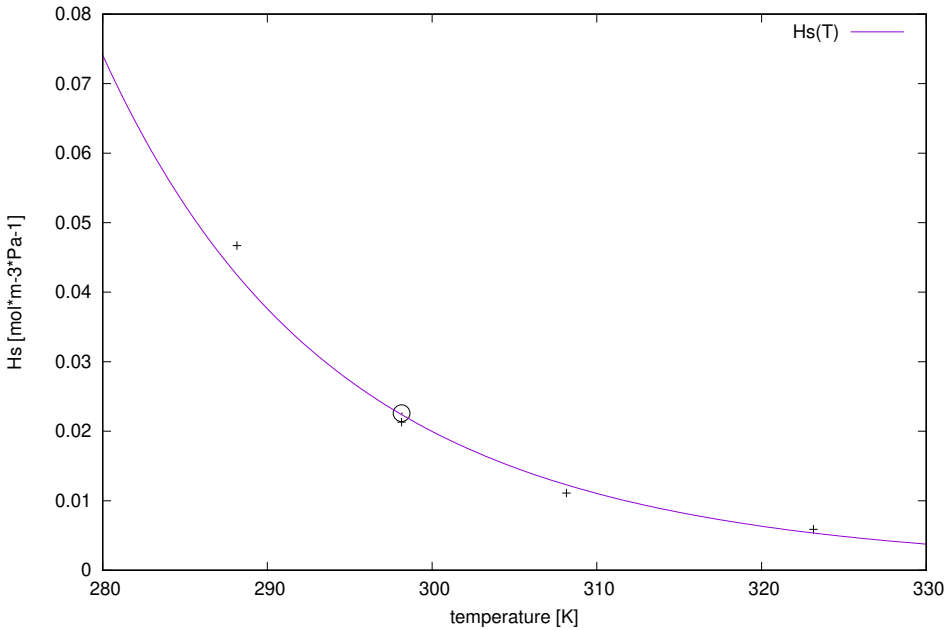

ref = 3724; chem = 4-methylbenzaldehyde; casrn = 104-87-0; r2 = 0.98687

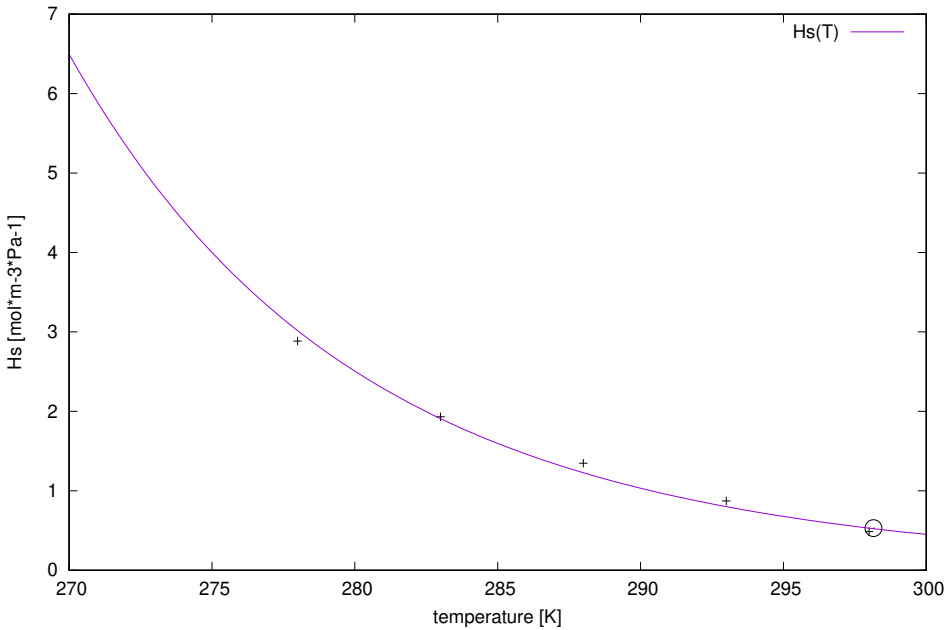

ref = 3724; chem = phenol; casrn = 108-95-2; r2 = 0.99798

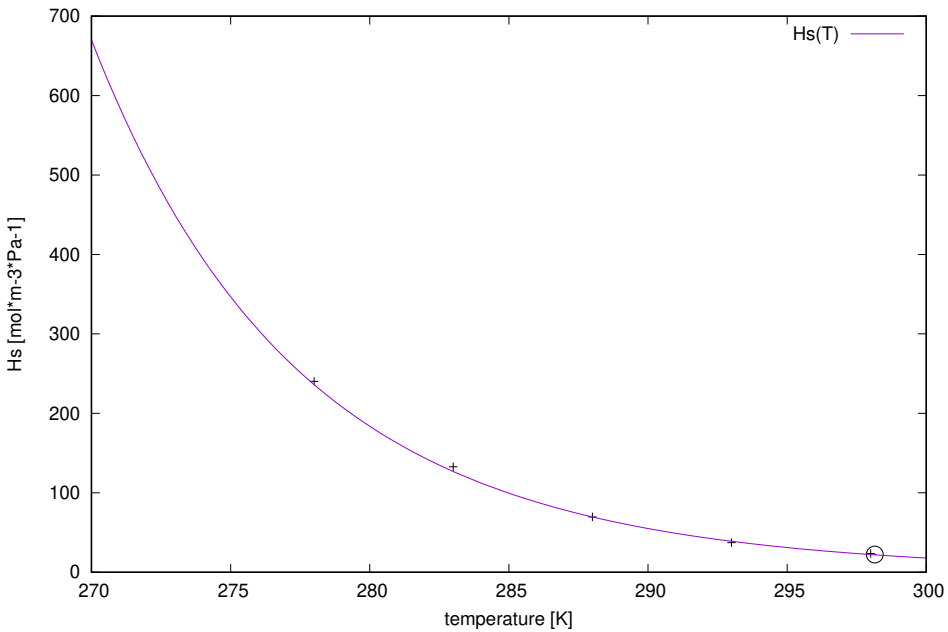



ref = 3724; chem = 2 †-hydroxyacetophenone; casrn = 118-93-4; r2 = 0.99810

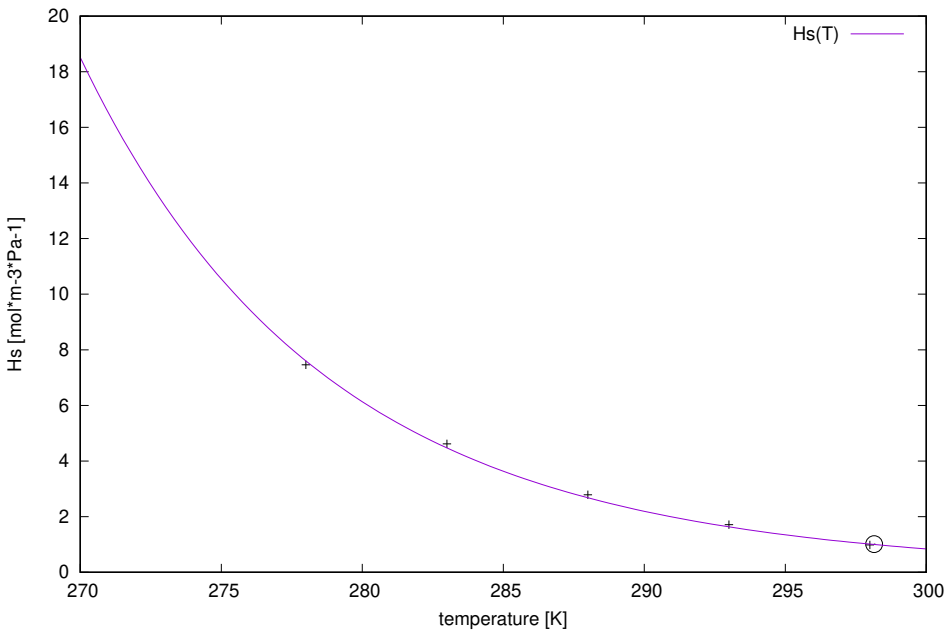

ref = 3724; chem = 4 †-methylacetophenone; casrn = 122-00-9; r2 = 0.98418

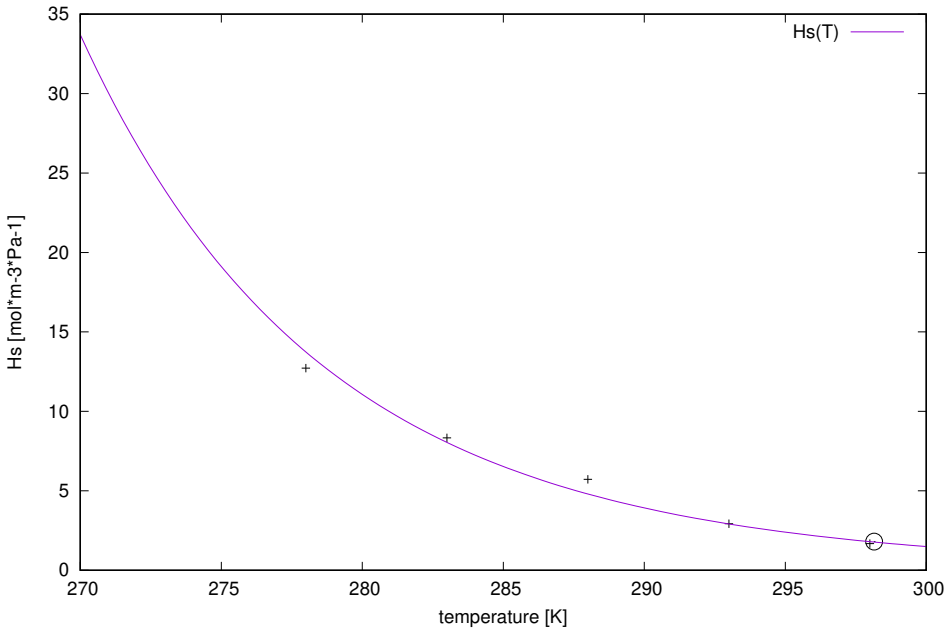

ref = 3724; chem = 4-methoxybenzaldehyde; casrn = 123-11-5; r2 = 0.99698

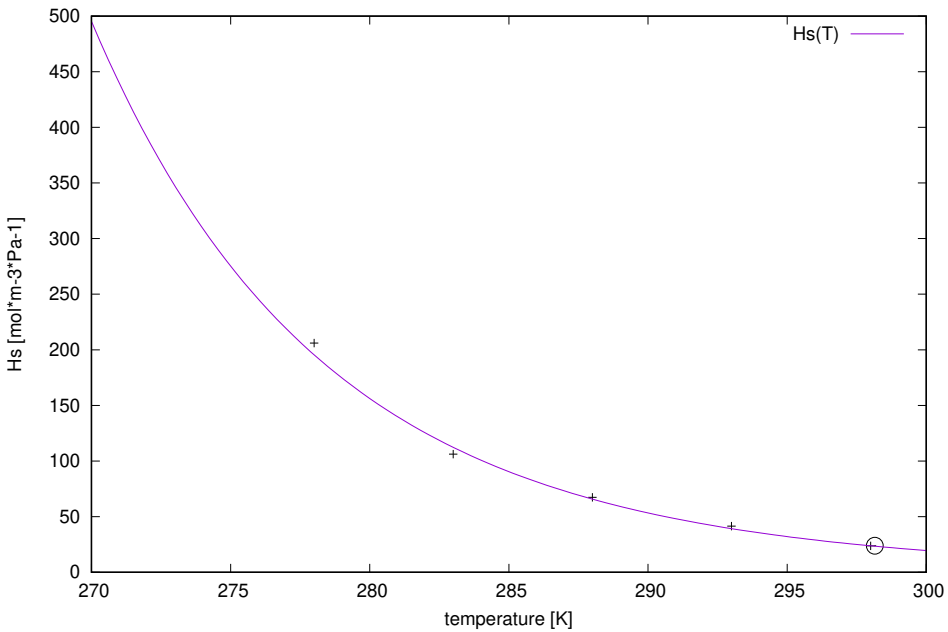

ref = 3724; chem = 2-methoxybenzaldehyde; casrn = 135-02-4; r2 = 0.99020

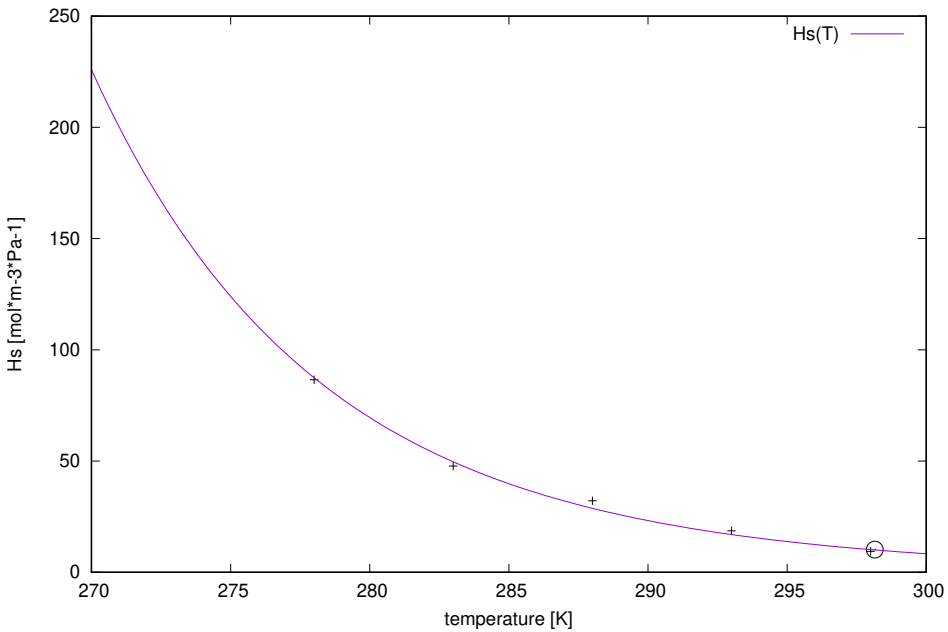

ref = 3724; chem = 2-methylbenzaldehyde; casrn = 529-20-4; r2 = 0.99552

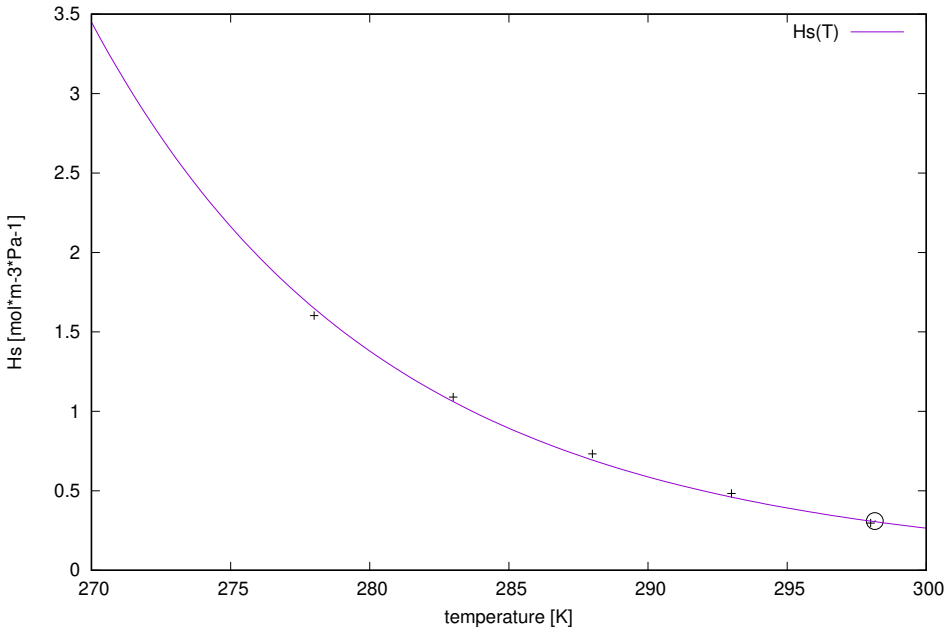

ref = 3724; chem = 2 †-methylacetophenone; casrn = 577-16-2; r2 = 0.99394

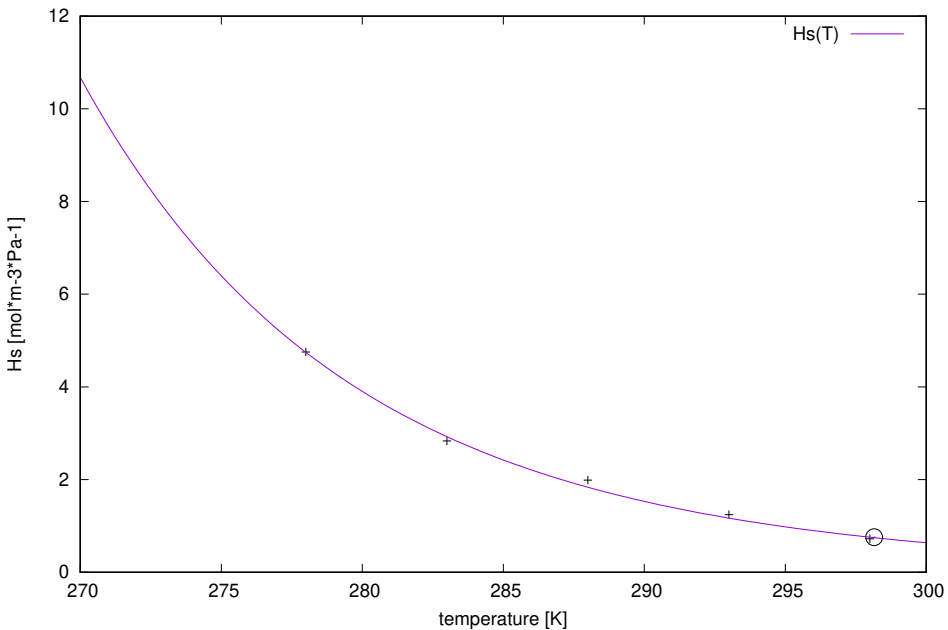

ref = 3724; chem = 2 †-methoxyacetophenone; casrn = 579-74-8; r2 = 0.99145

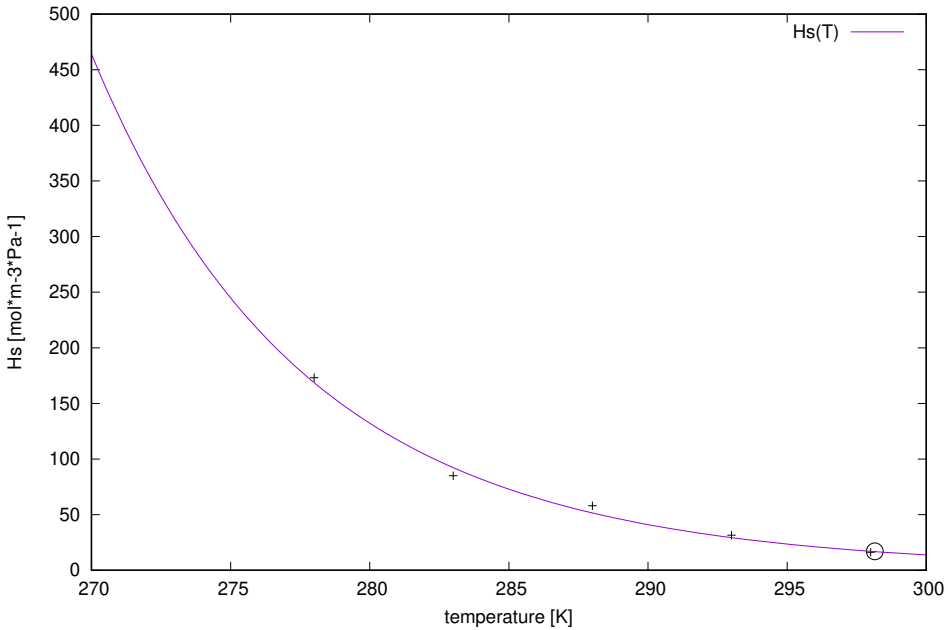

ref = 3724; chem = 3 †-methylacetophenone; casrn = 585-74-0; r2 = 0.99498

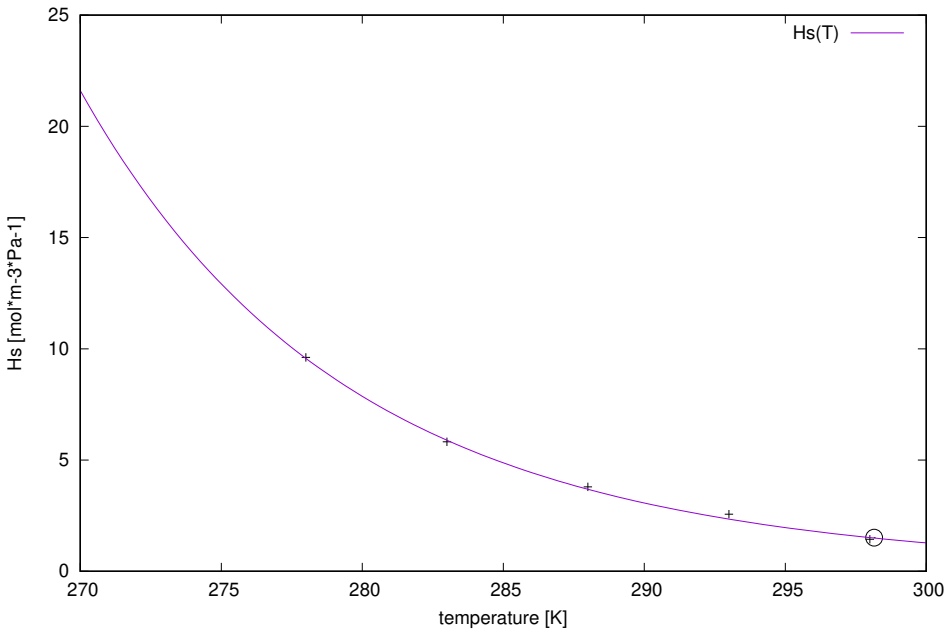



ref = 3724; chem = 3 †-methoxyacetophenone; casrn = 586-37-8; r2 = 0.98753

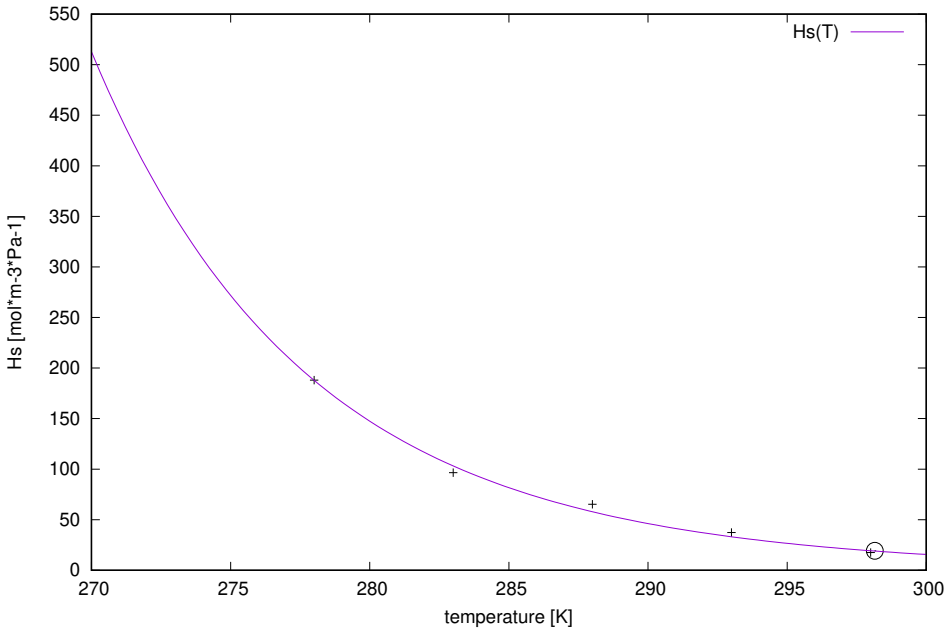

ref = 3724; chem = 3-methoxybenzaldehyde; casrn = 591-31-1; r2 = 0.98720

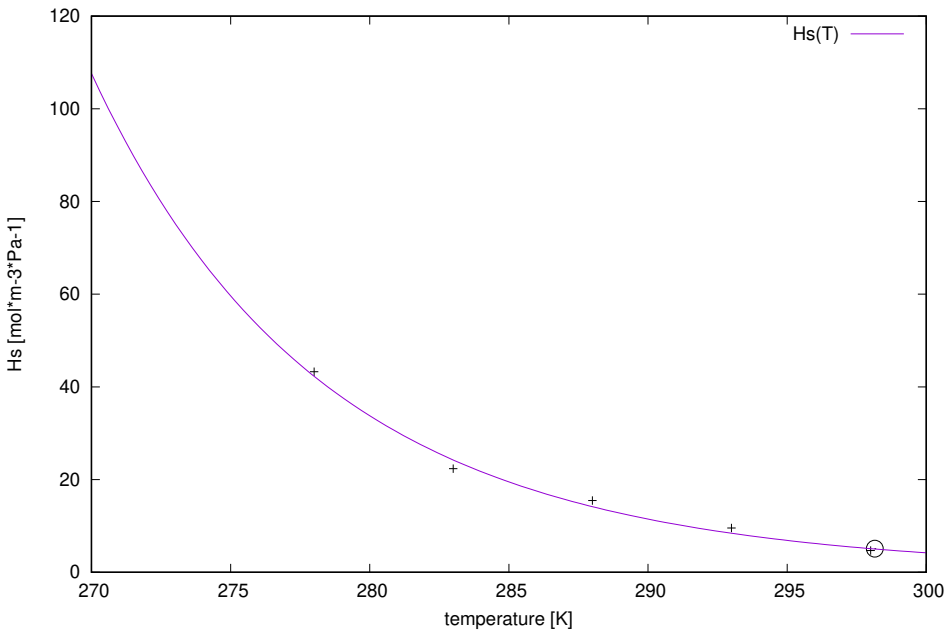

ref = 3724; chem = 3-methylbenzaldehyde; casrn = 620-23-5; r2 = 0.98947

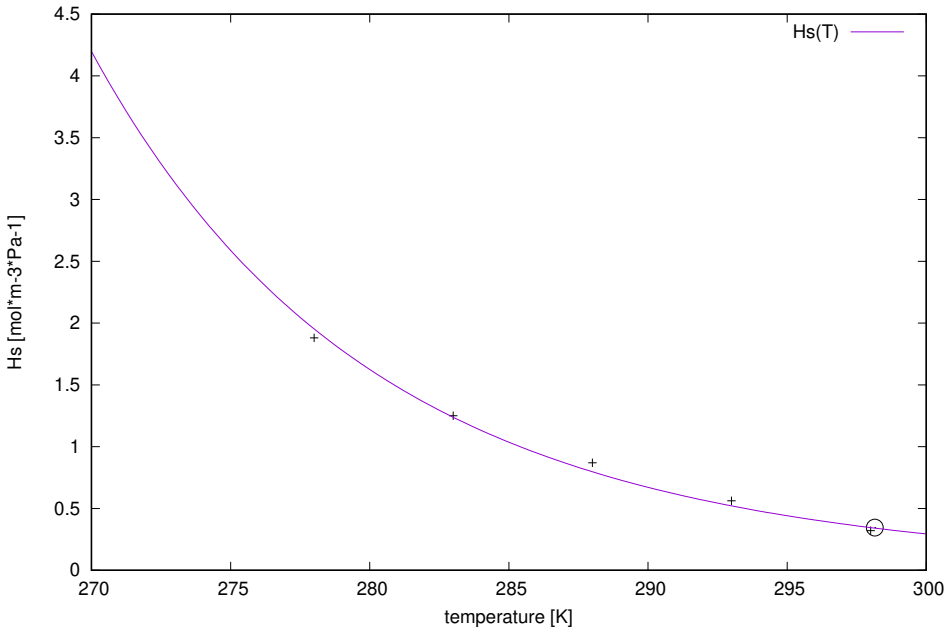

ref = 3724; chem = salicylaldehyde; casrn = 90-02-8; r2 = 0.99324

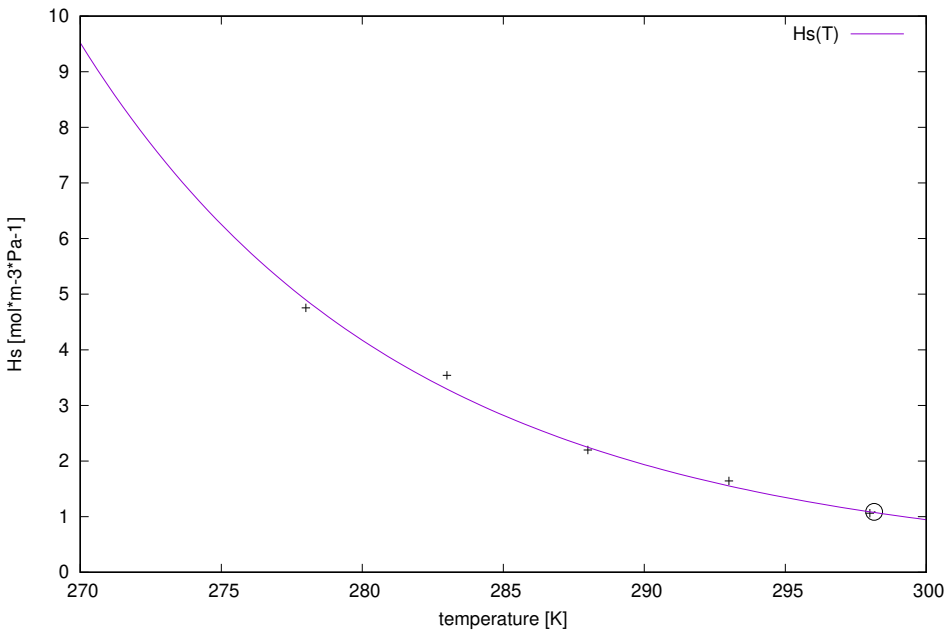

ref = 3724; chem = propiophenone; casrn = 93-55-0; r2 = 0.98328

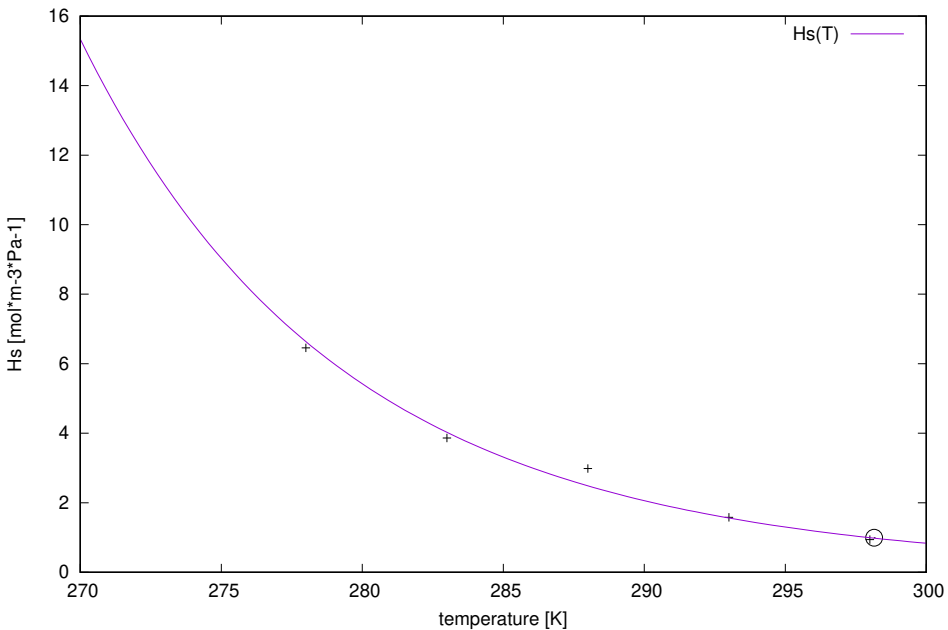

ref = 3724; chem = acetophenone; casrn = 98-86-2; r2 = 0.98941

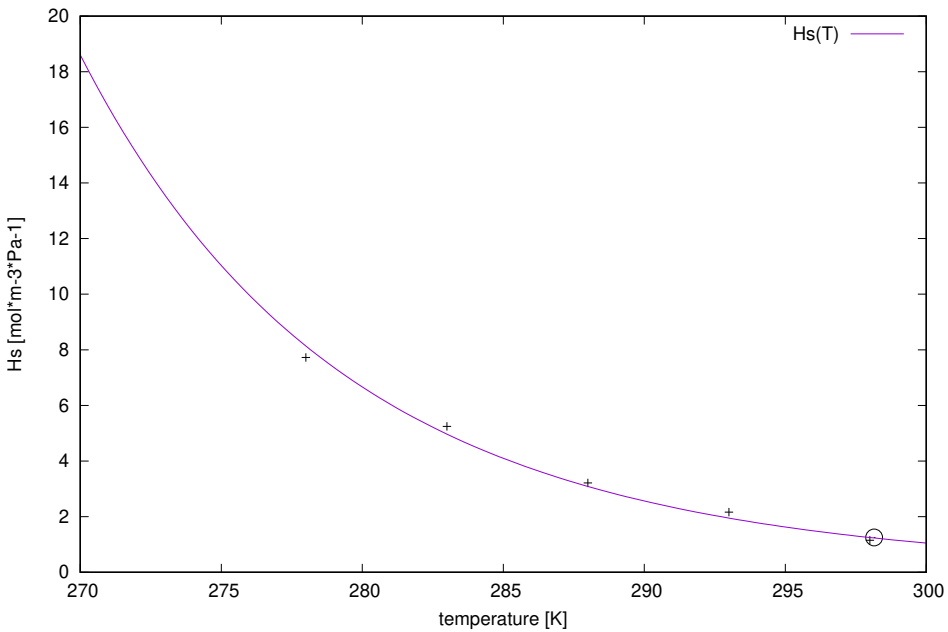

ref = 3726; chem = furoyl peroxyxynitrate; casrn = ; r2 = 1.00000

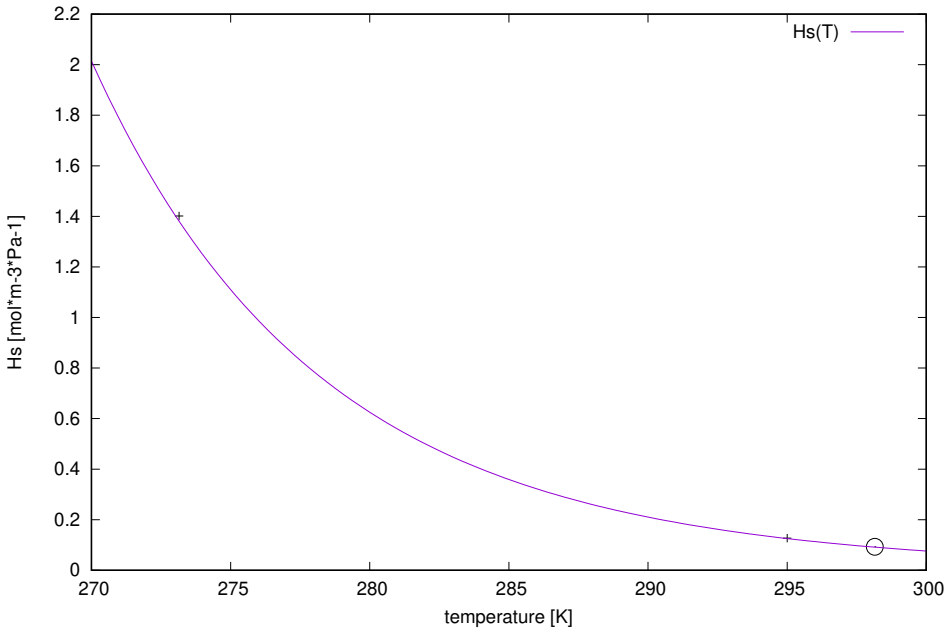

ref = 3734; chem = butane; casrn = 106-97-8; r2 = 0.99159

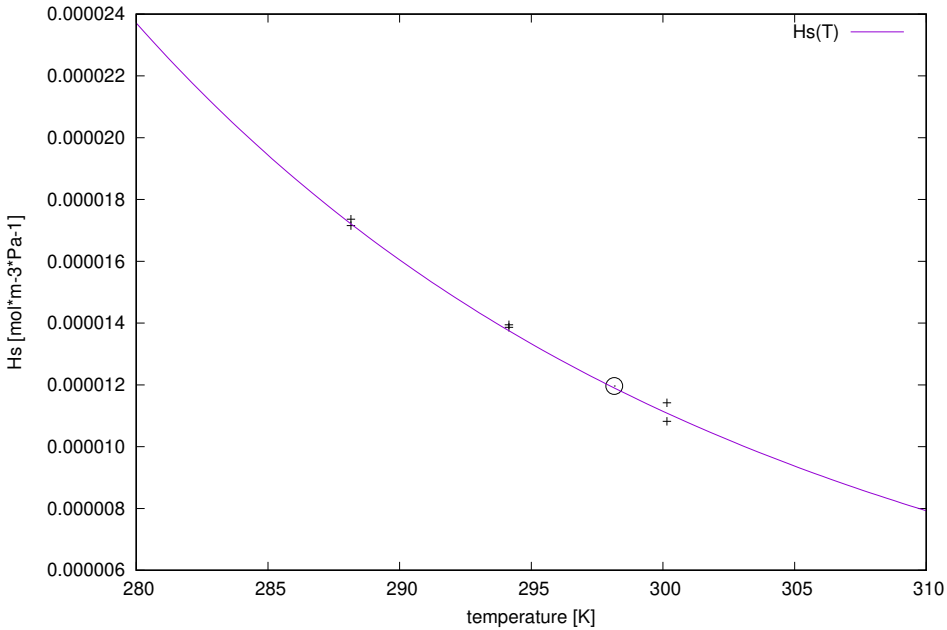



ref = 3734; chem = methane; casrn = 74-82-8; r2 = 0.99122

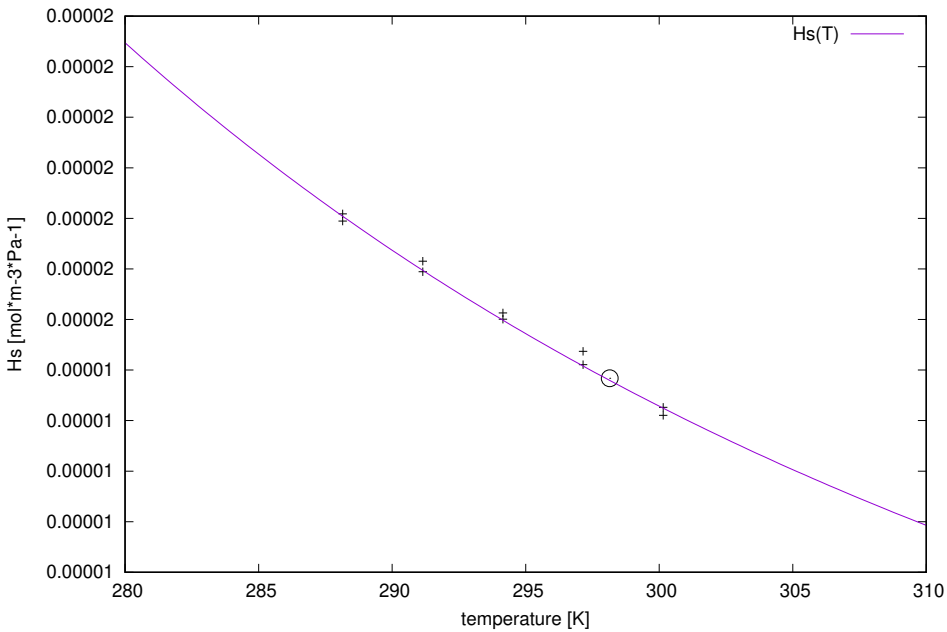

ref = 3734; chem = ethane; casrn = 74-84-0; r2 = 0.99751

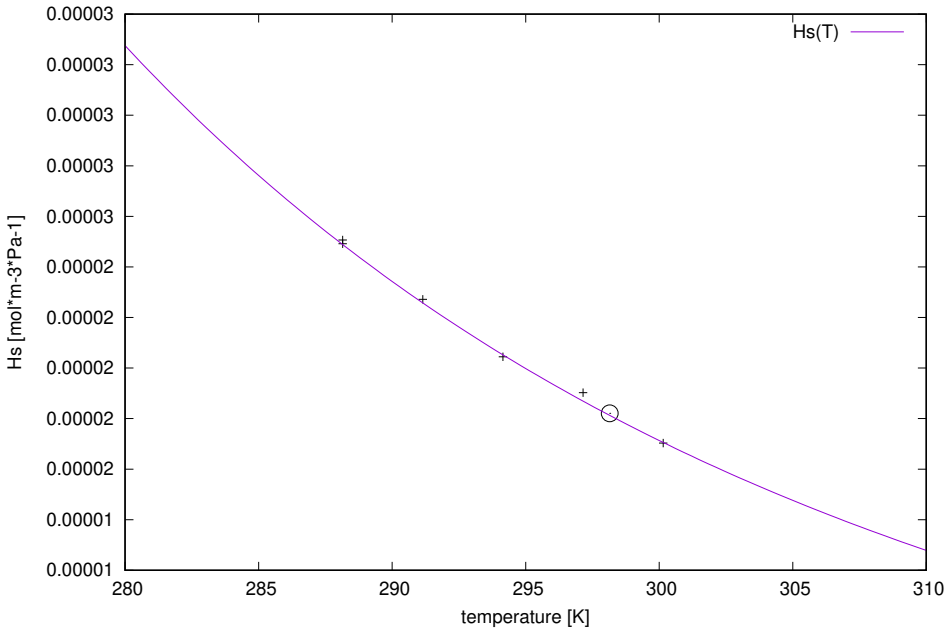

ref = 3734; chem = propane; casrn = 74-98-6; r2 = 0.97973

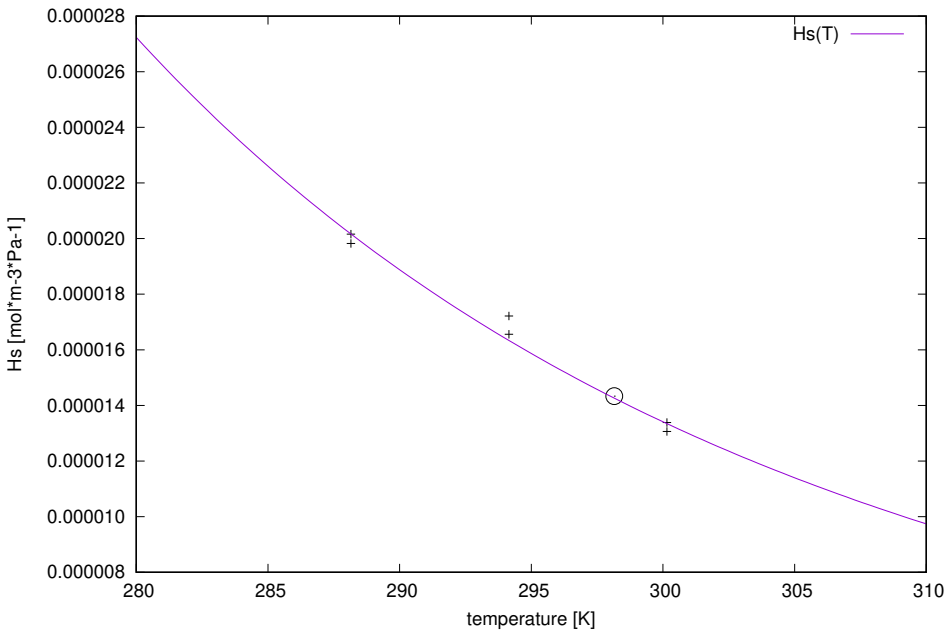

ref = 3748; chem = acetylene; casrn = 74-86-2; r2 = 0.99888

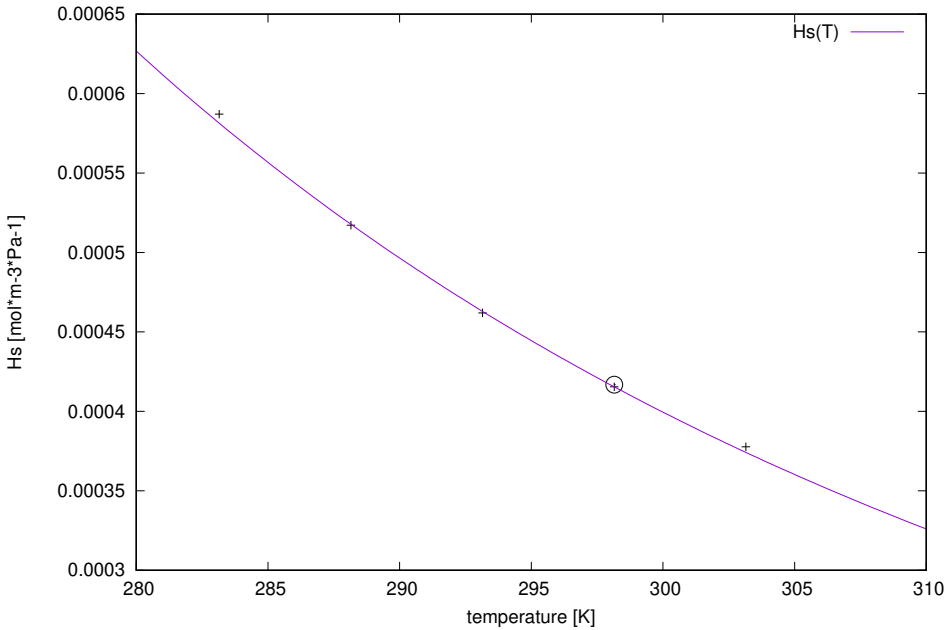

ref = 3751; chem = acetylene; casrn = 74-86-2; r2 = 0.99748

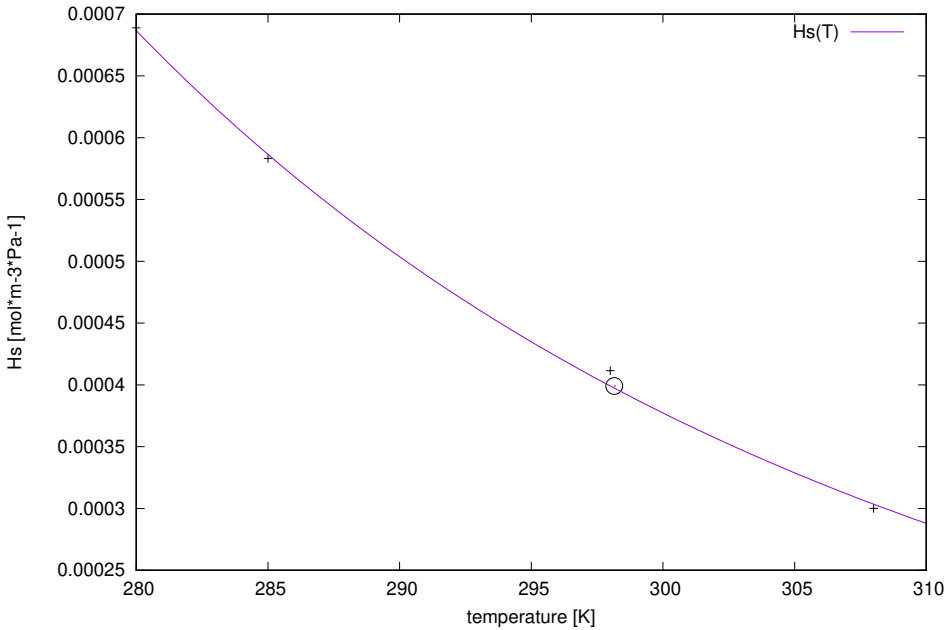

ref = 3769; chem = PAN; casrn = 2278-22-0; r2 = 1.00000

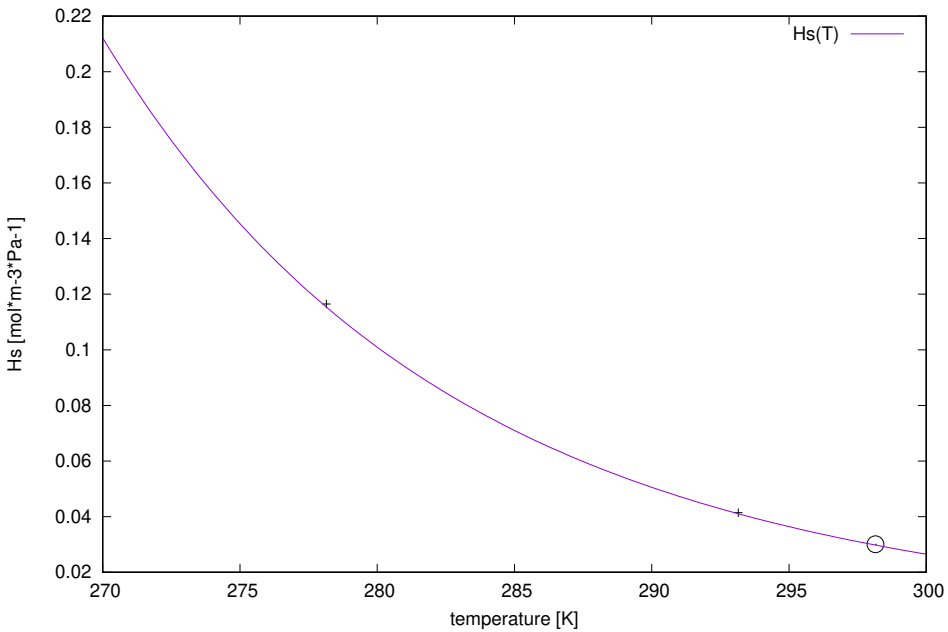

ref = 3769; chem = PPN; casrn = 5796-89-4; r2 = 0.97450

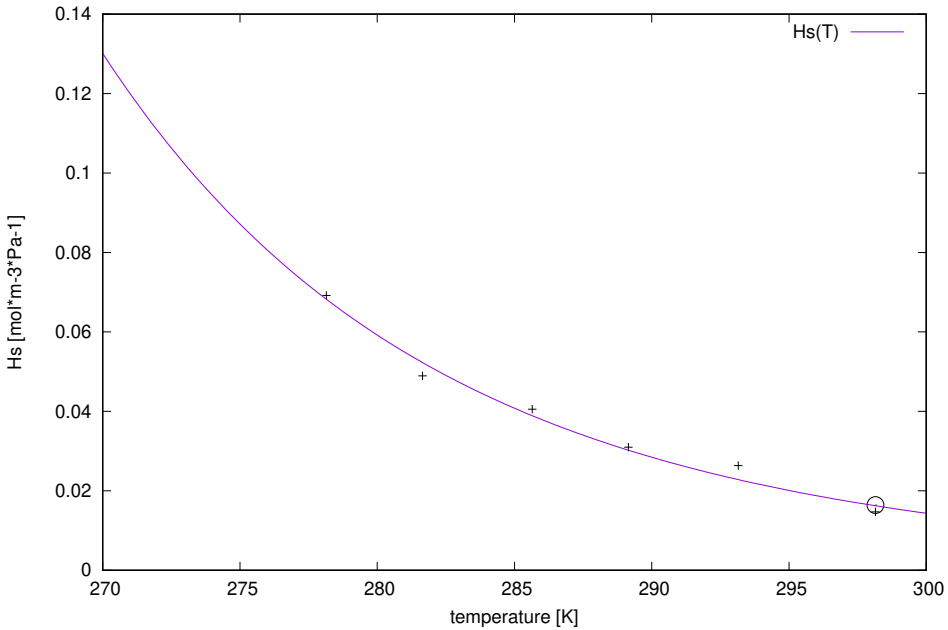

ref = 3776; chem = p-tolualdehyde; casrn = 104-87-0; r2 = 0.99312

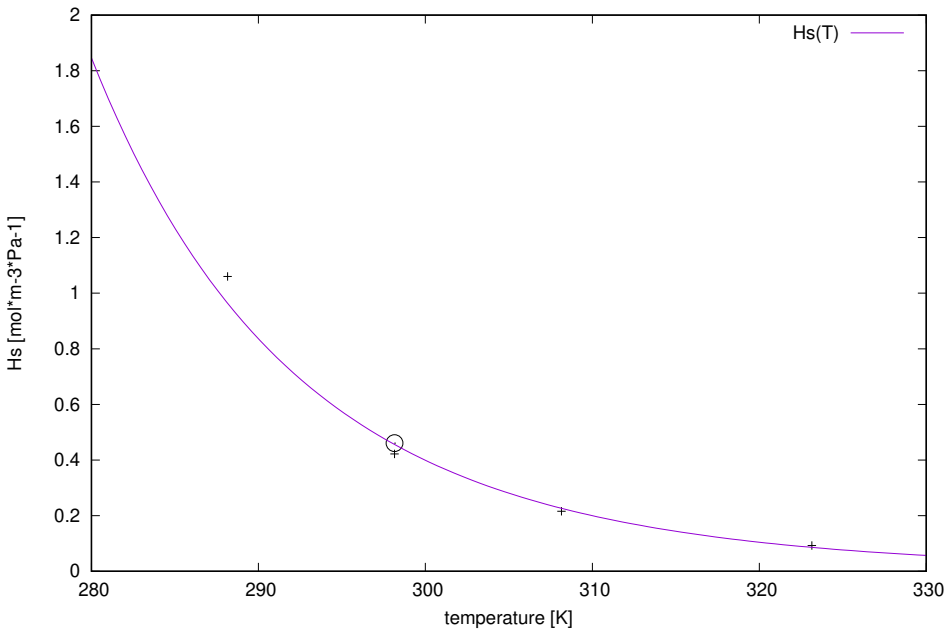



ref = 3776; chem = 6-methyl-5-hepten-2-one; casrn = 110-93-0; r2 = 0.99808

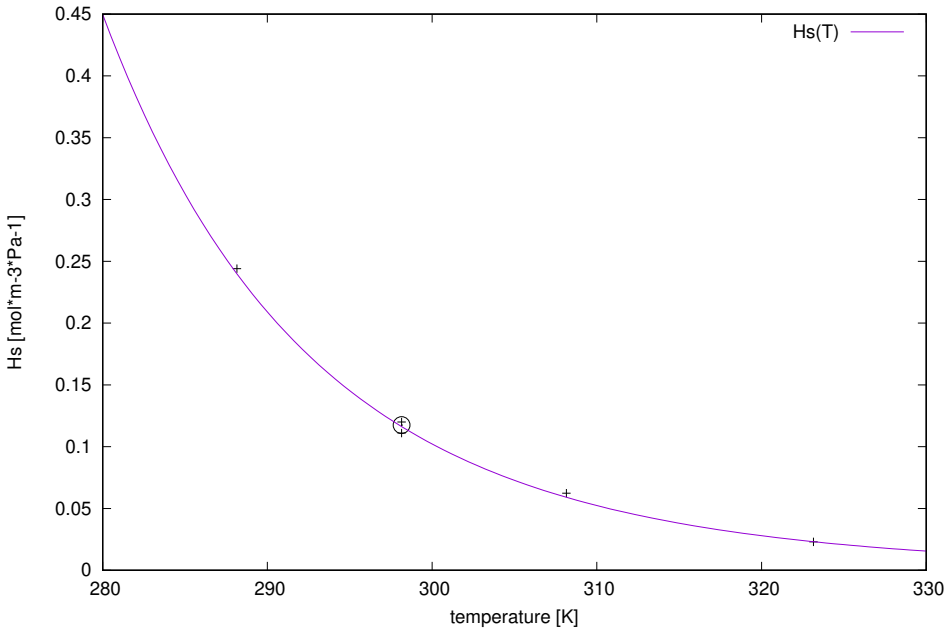

ref = 3776; chem = diacetyl; casrn = 431-03-8; r2 = 0.99350

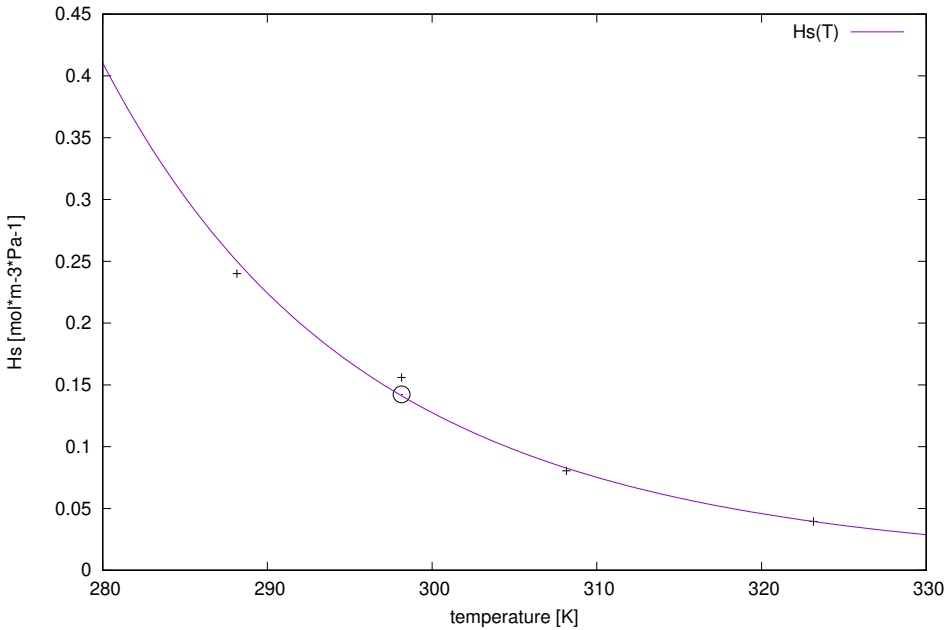

ref = 3776; chem = citral; casrn = 5392-40-5; r2 = 0.99961

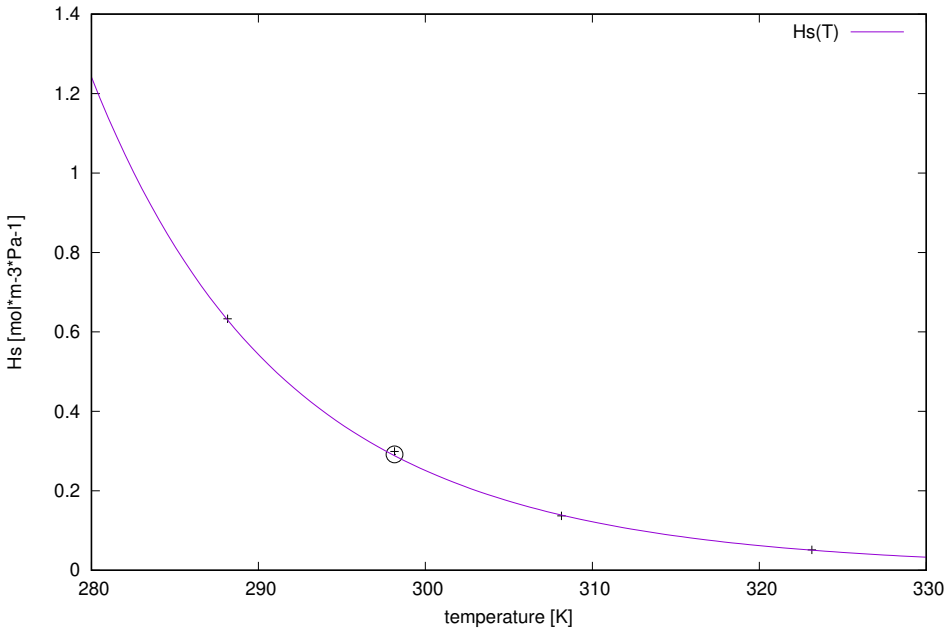

ref = 3776; chem = 2,3-pentanedione; casrn = 600-14-6; r2 = 0.99686

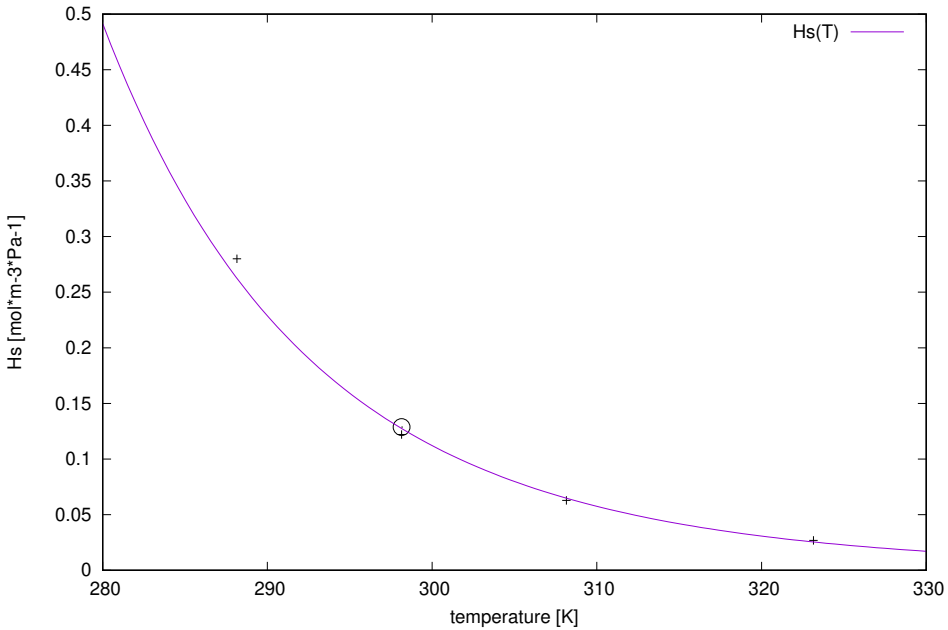

ref = 3776; chem = m-tolualdehyde; casrn = 620-23-5; r2 = 0.99951

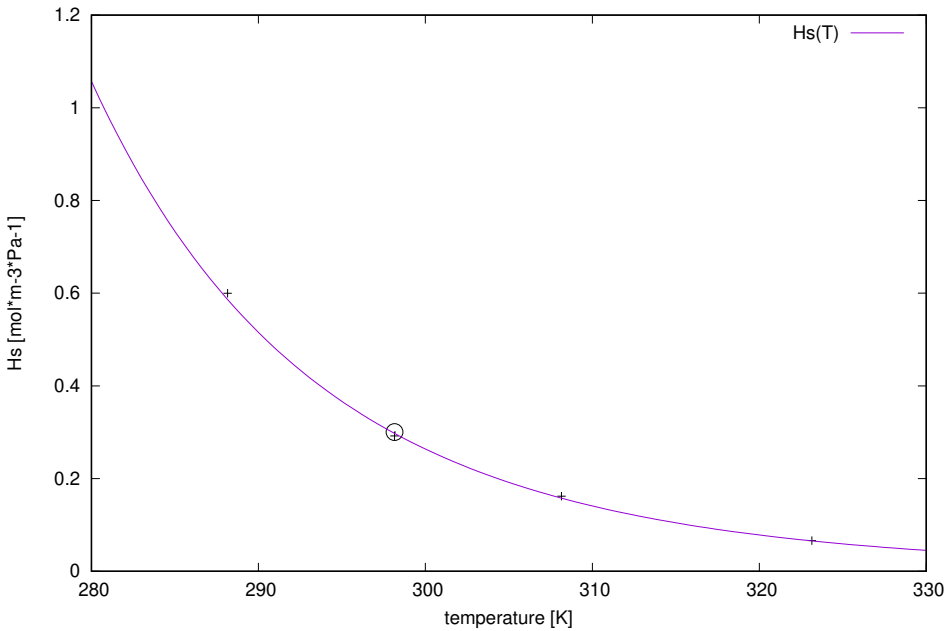

+ ref = 3777; chem = hydrogen; casrn = 1333-74-0; r2 = 0.66094

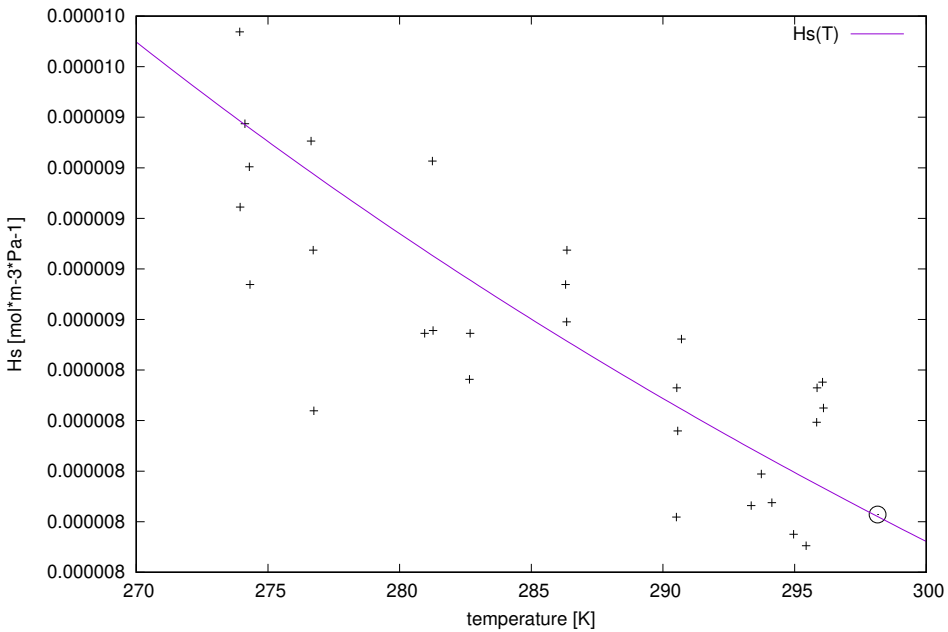

ref = 3777; chem = carbon monoxide; casrn = 630-08-0; r2 = 0.86037

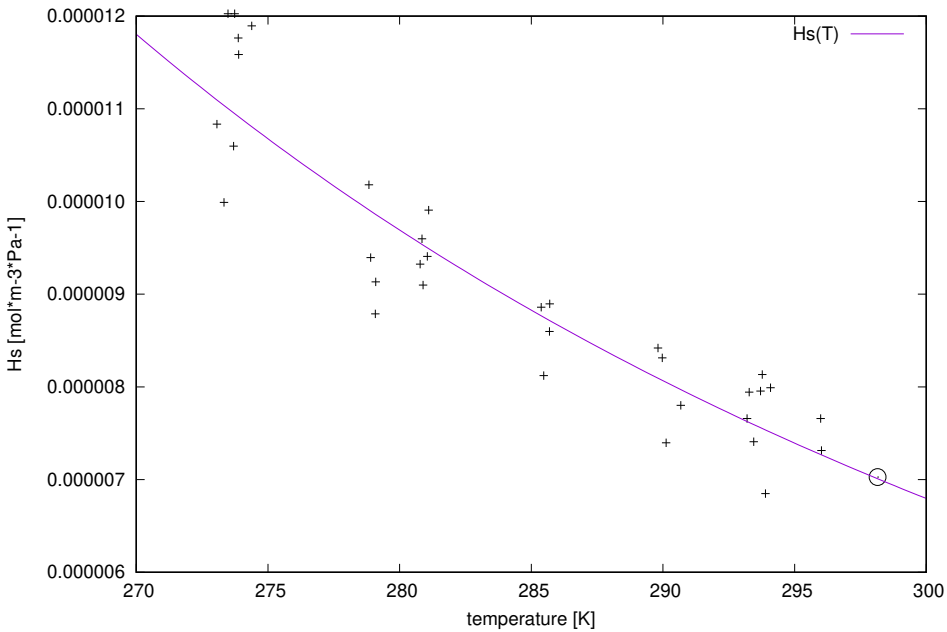

ref = 3781; chem = hydrogen; casrn = 1333-74-0; r2 = 0.99749

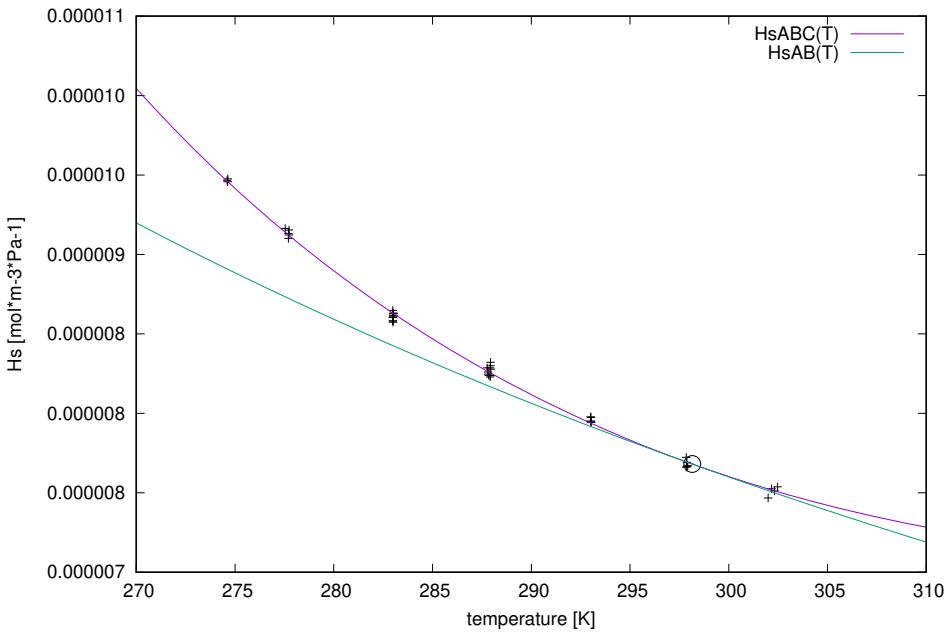



ref = 3782; chem = hydrogen; casrn = 1333-74-0; r2 = 0.99763

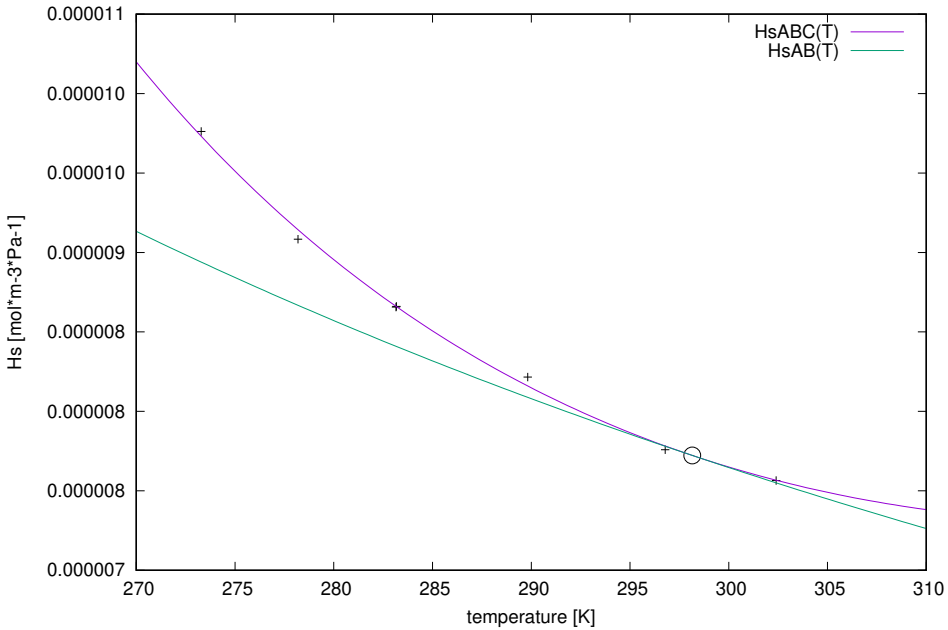

ref = 3783; chem = butane; casrn = 106-97-8; r2 = 0.99997

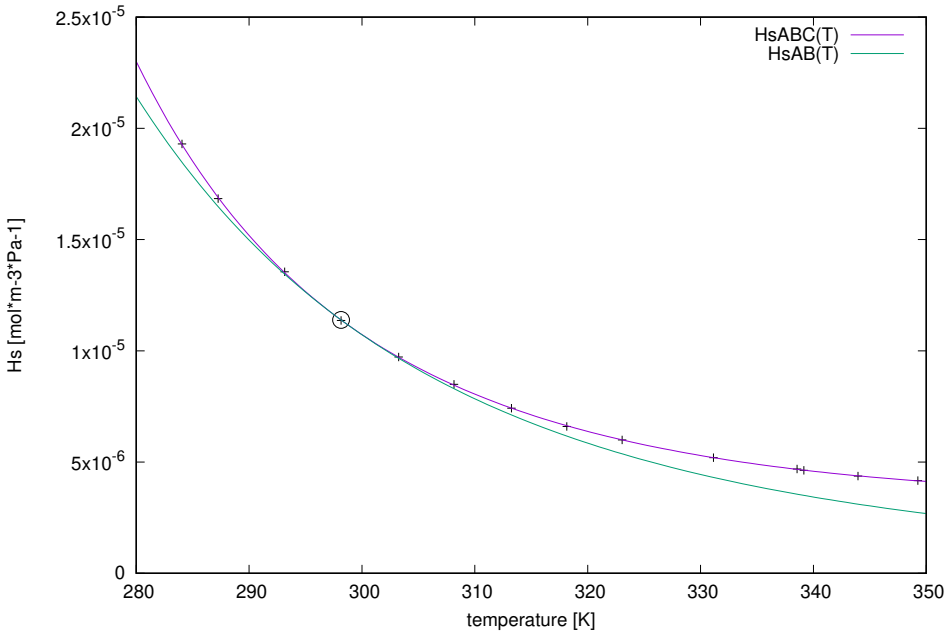

ref = 3783; chem = carbon dioxide; casrn = 124-38-9; r2 = 0.99983

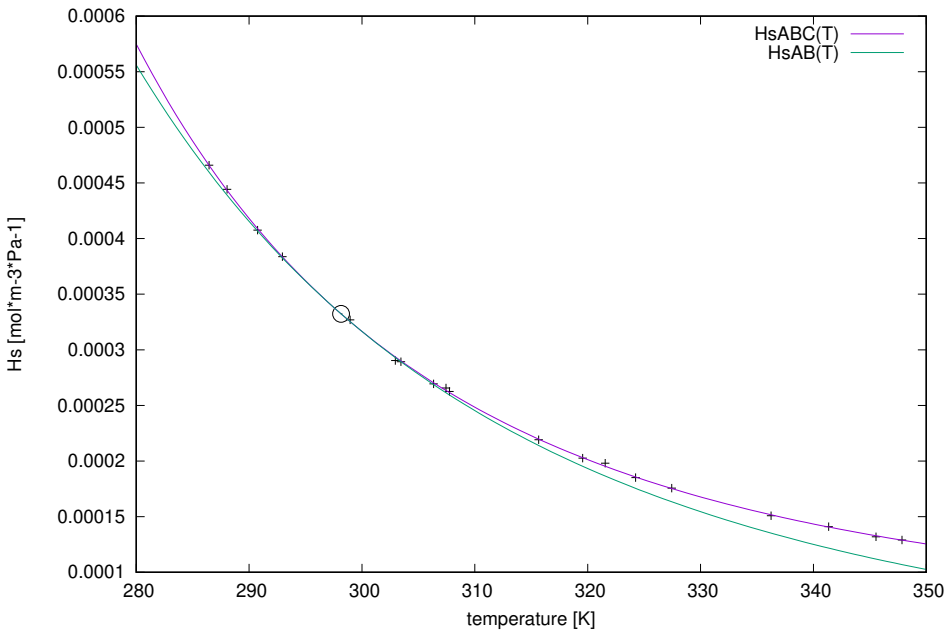

ref = 3783; chem = hydrogen; casrn = 1333-74-0; r2 = 0.99965

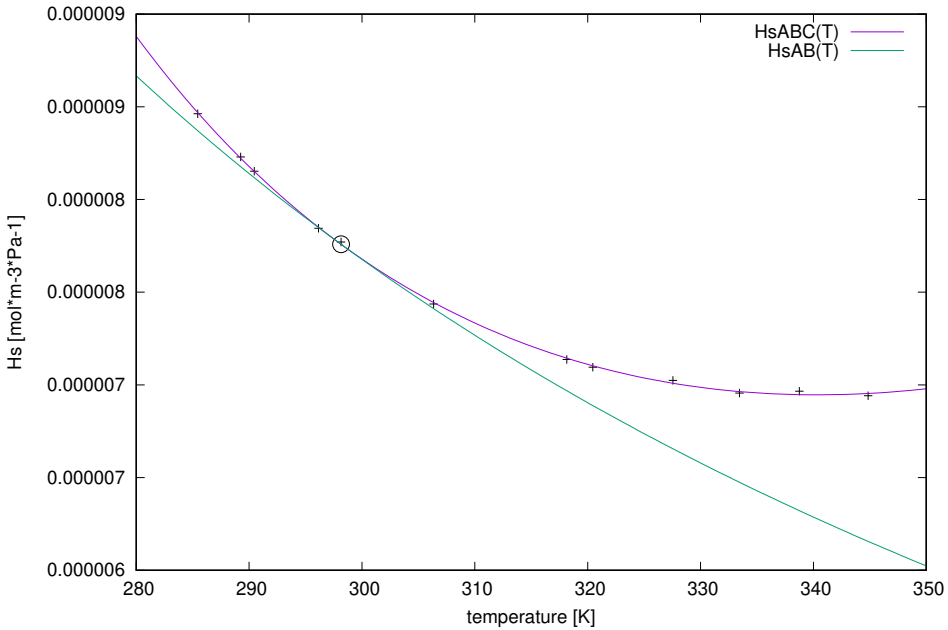

ref = 3783; chem = methane; casrn = 74-82-8; r2 = 0.99972

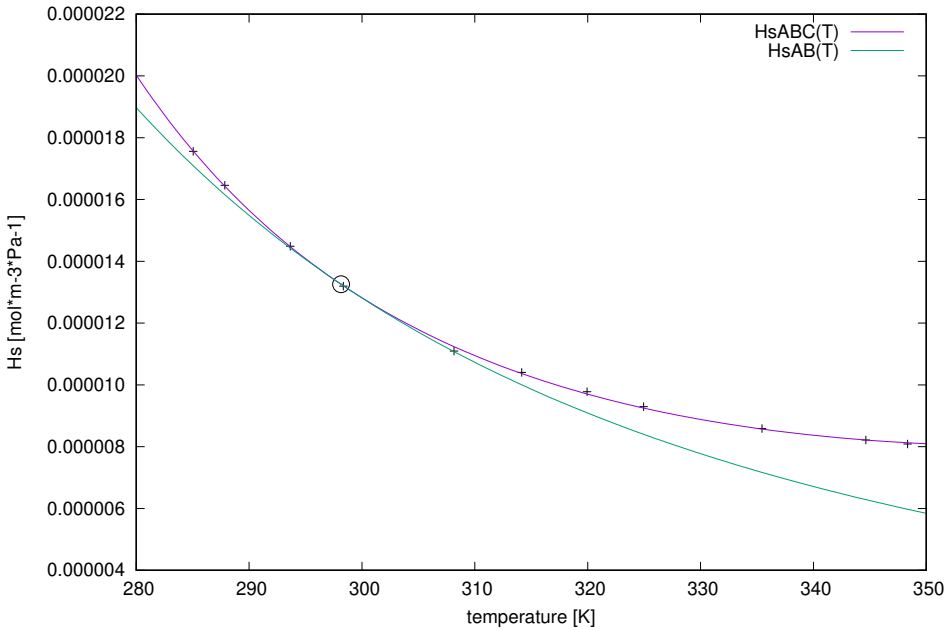

ref = 3783; chem = ethane; casrn = 74-84-0; r2 = 0.99984

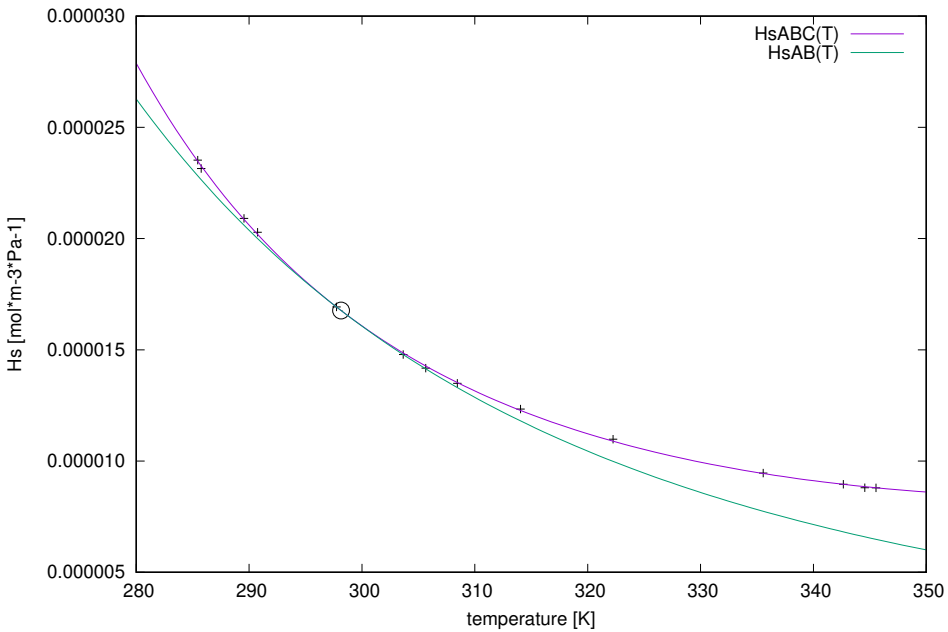

ref = 3783; chem = ethene; casrn = 74-85-1; r2 = 0.99963

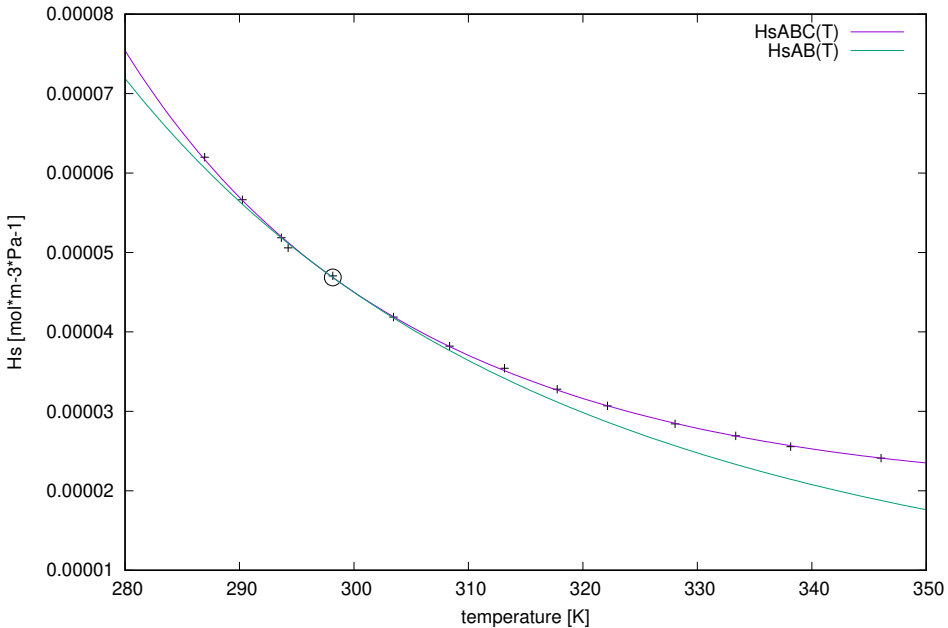

ref = 3783; chem = propane; casrn = 74-98-6; r2 = 0.99982

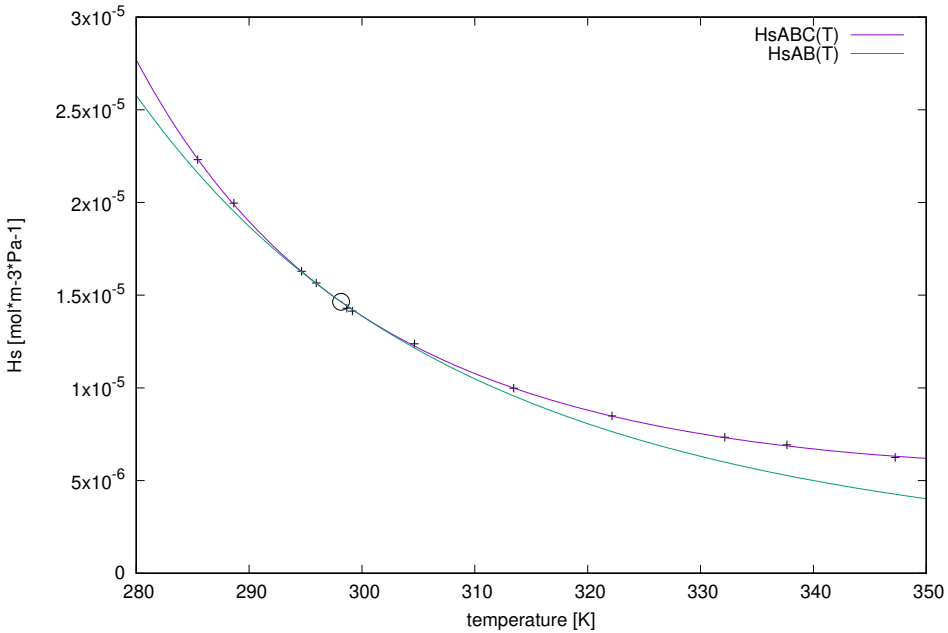



ref = 3783; chem = nitrogen; casrn = 7727-37-9; r2 = 0.99919

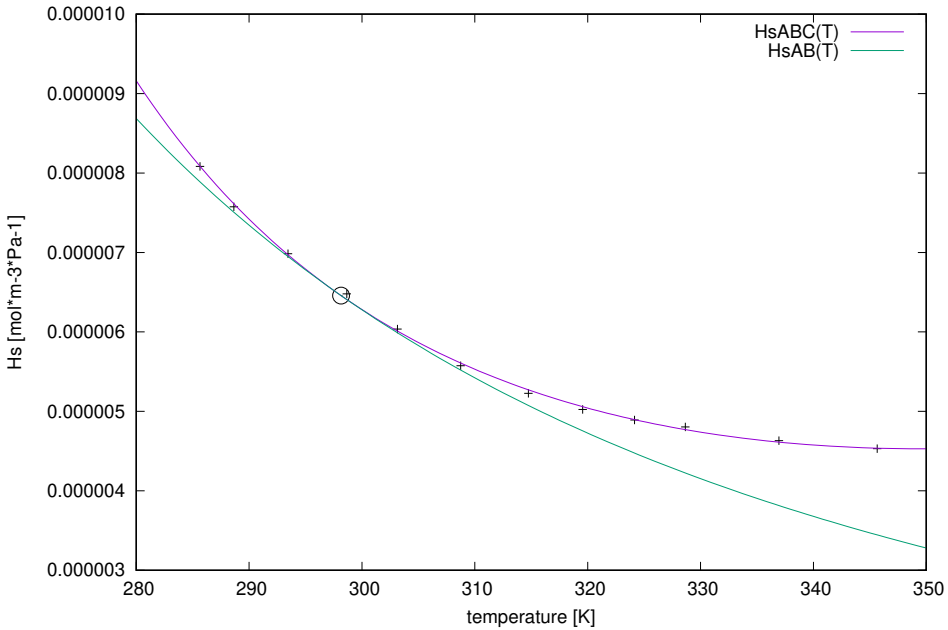

ref = 3783; chem = oxygen; casrn = 7782-44-7; r2 = 0.99953

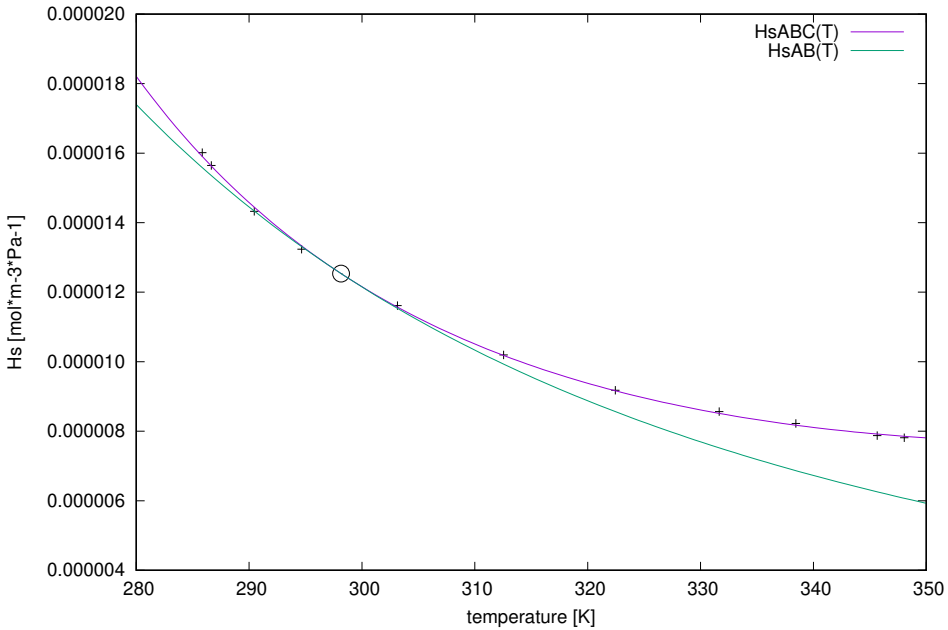

ref = 3785; chem = C(CH3)4; casrn = 463-82-1; r2 = 0.99894

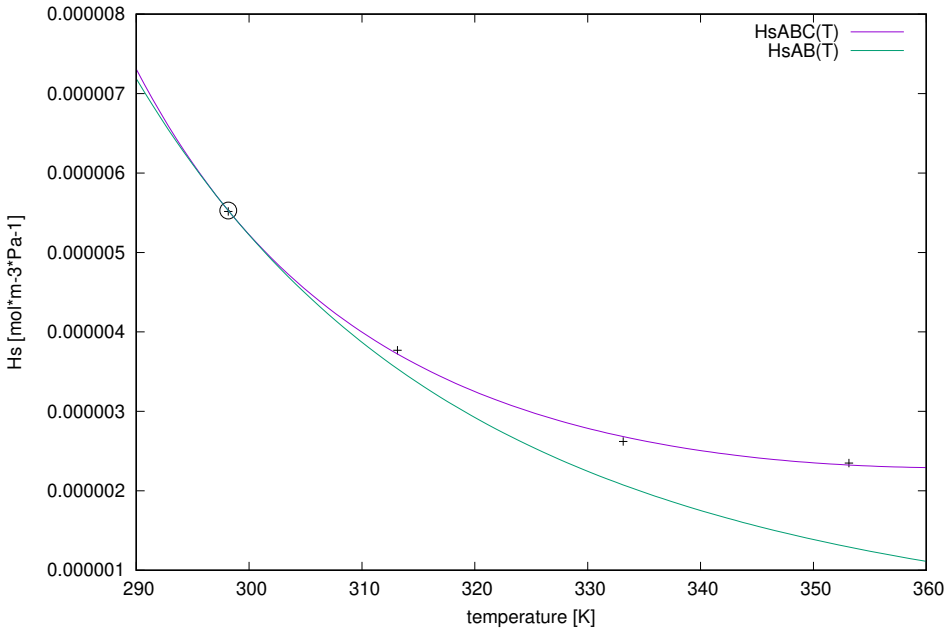

ref = 3785; chem = methane; casrn = 74-82-8; r2 = 0.99540

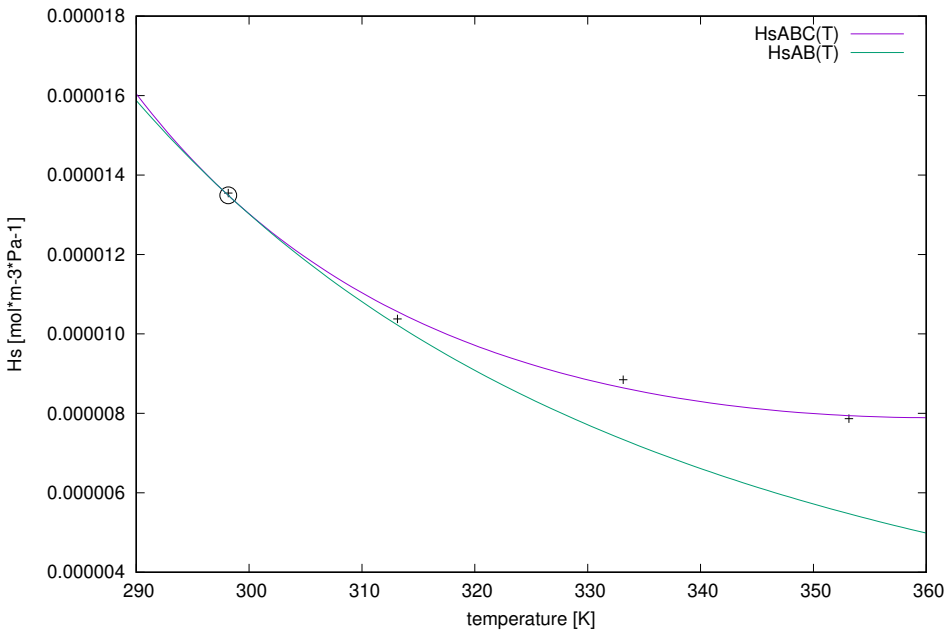

ref = 3785; chem = argon; casrn = 7440-37-1; r2 = 0.99921

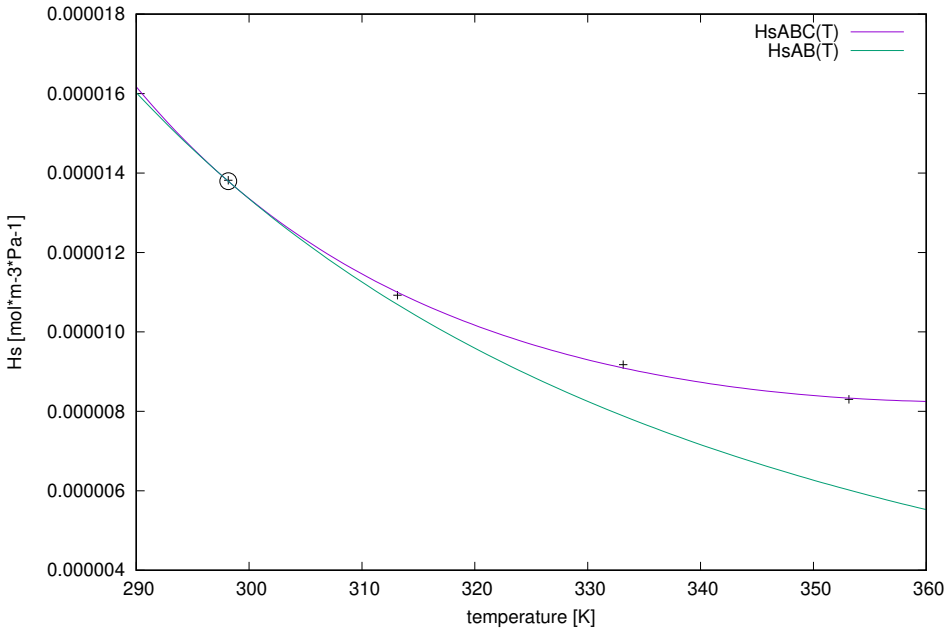

ref = 3785; chem = oxygen; casrn = 7782-44-7; r2 = 0.99989

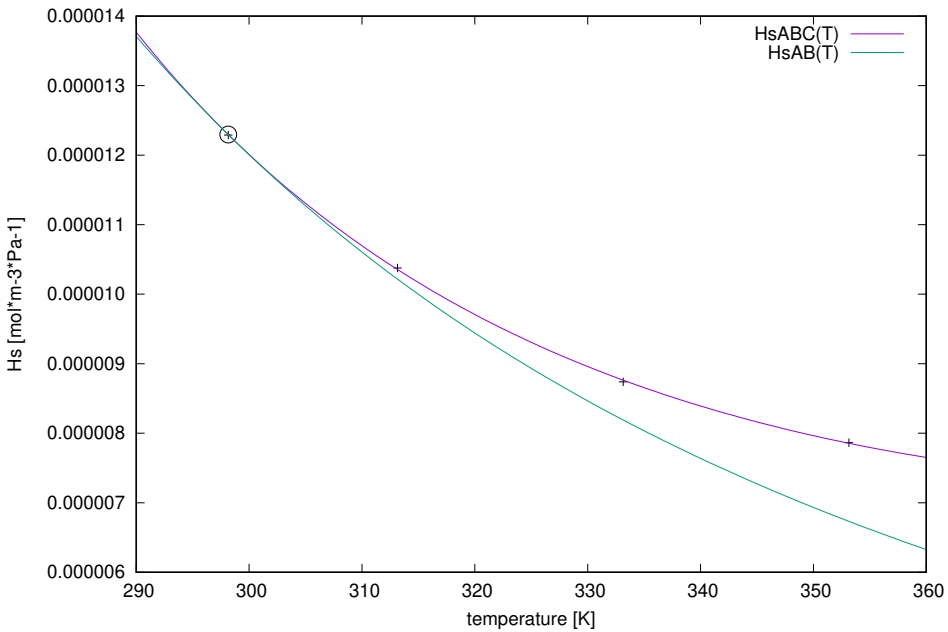

ref = 3788; chem = isoamyl alcohol; casrn = 123-51-3; r2 = 0.99893

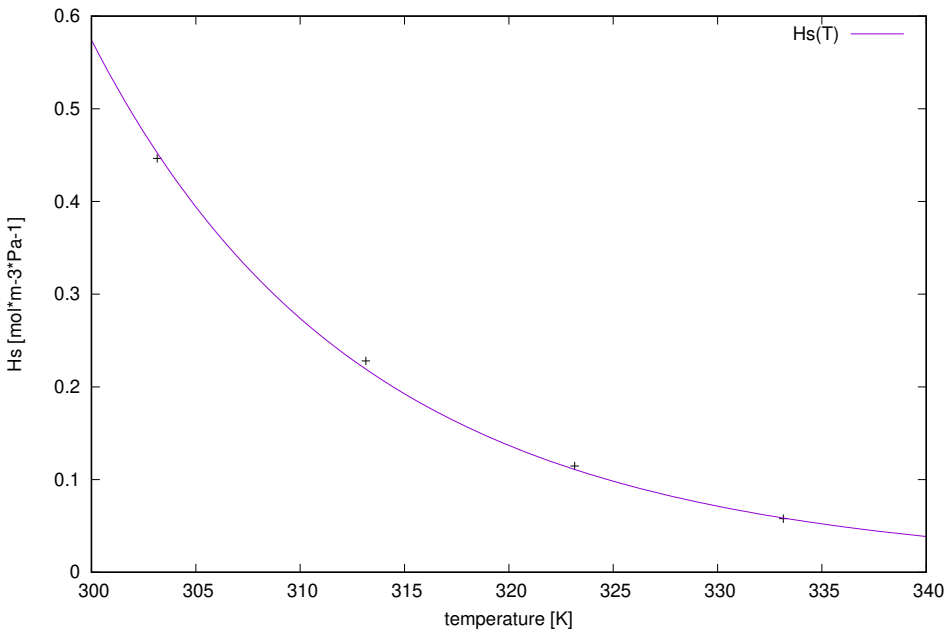

ref = 3788; chem = isoamyl acetate; casrn = 123-92-2; r2 = 0.99682

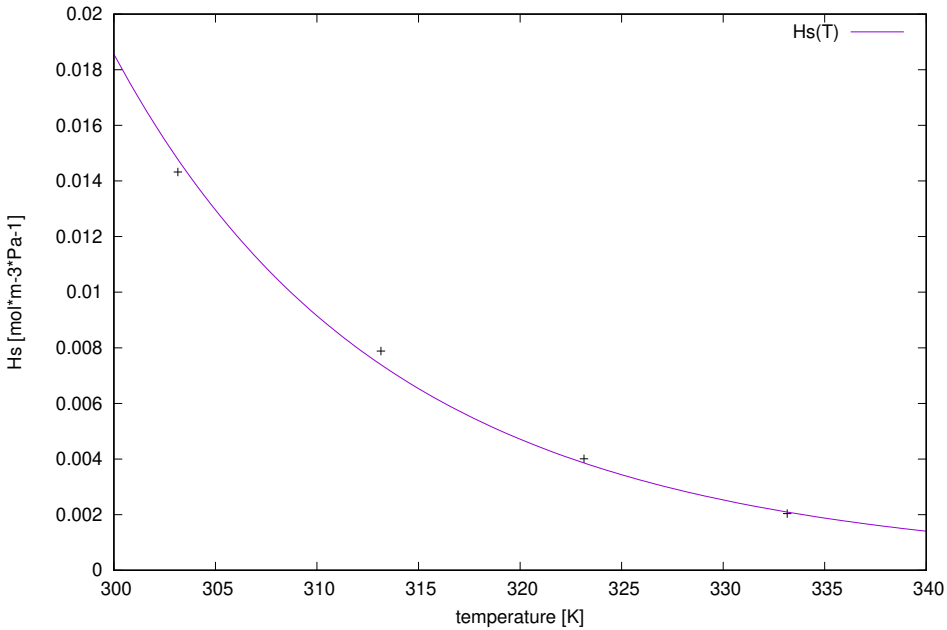



ref = 3788; chem = ethyl acetate; casrn = 141-78-6; r2 = 0.99984

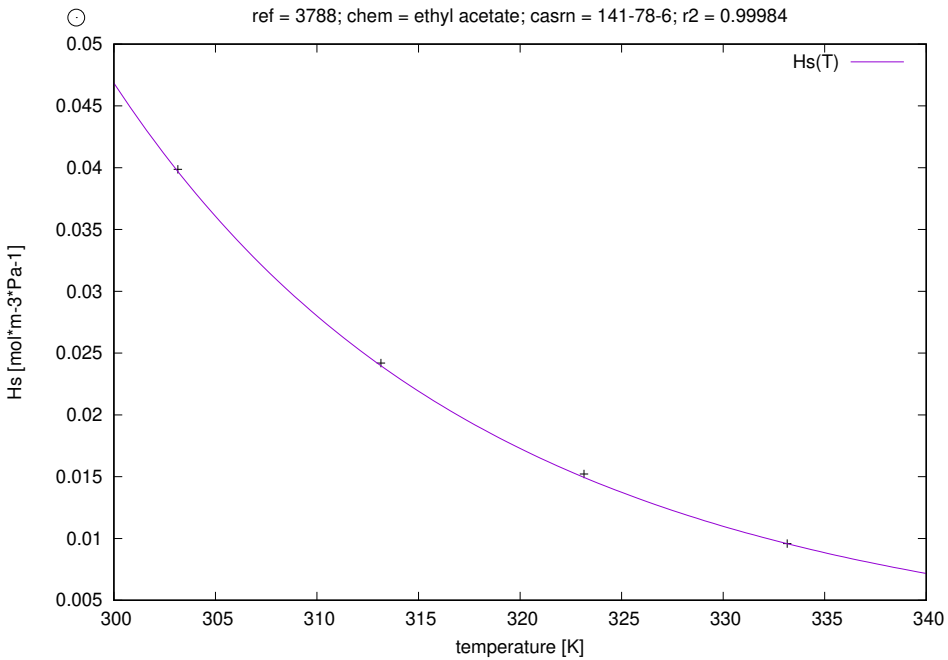

ref = 3789; chem = neon; casrn = 7440-01-9; r2 = 0.00837

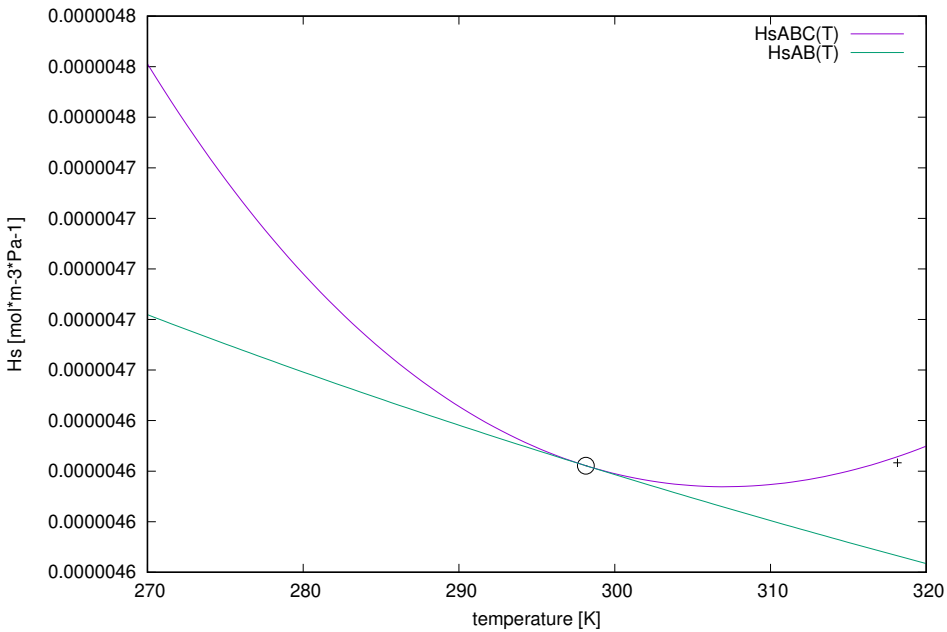

ref = 3789; chem = argon; casrn = 7440-37-1; r2 = 0.99874

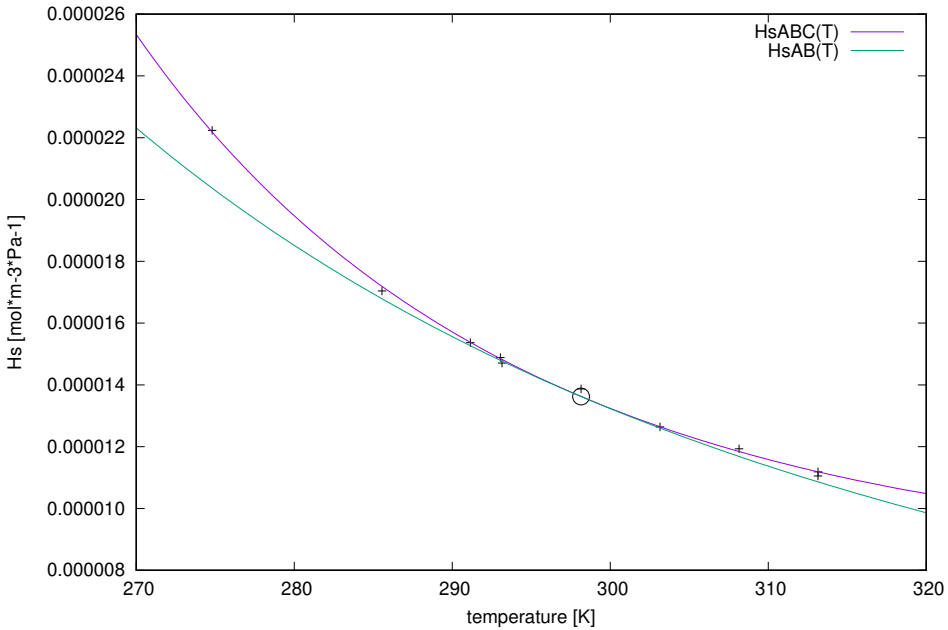

ref = 3789; chem = helium; casrn = 7440-59-7; r2 = 0.73684

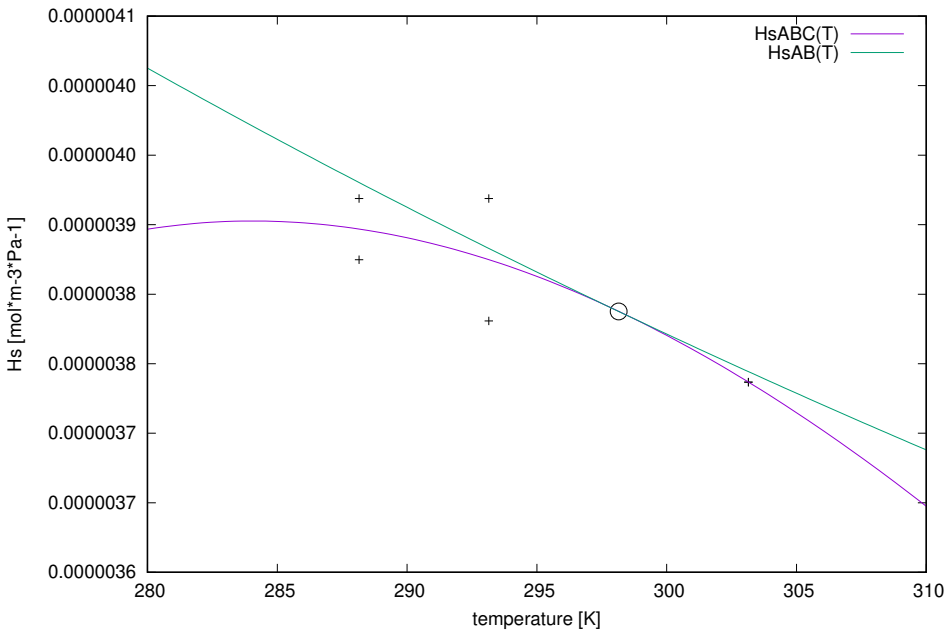

ref = 3794; chem = biphenyl; casrn = 92-52-4; r2 = 1.00000

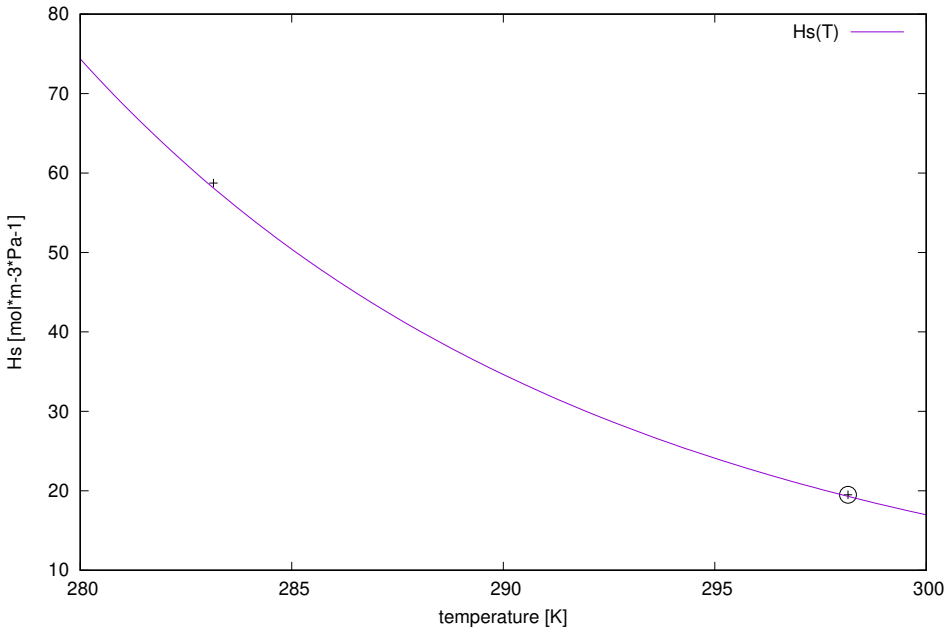

ref = 3795; chem = hydrogen; casrn = 1333-74-0; r2 = 0.99999

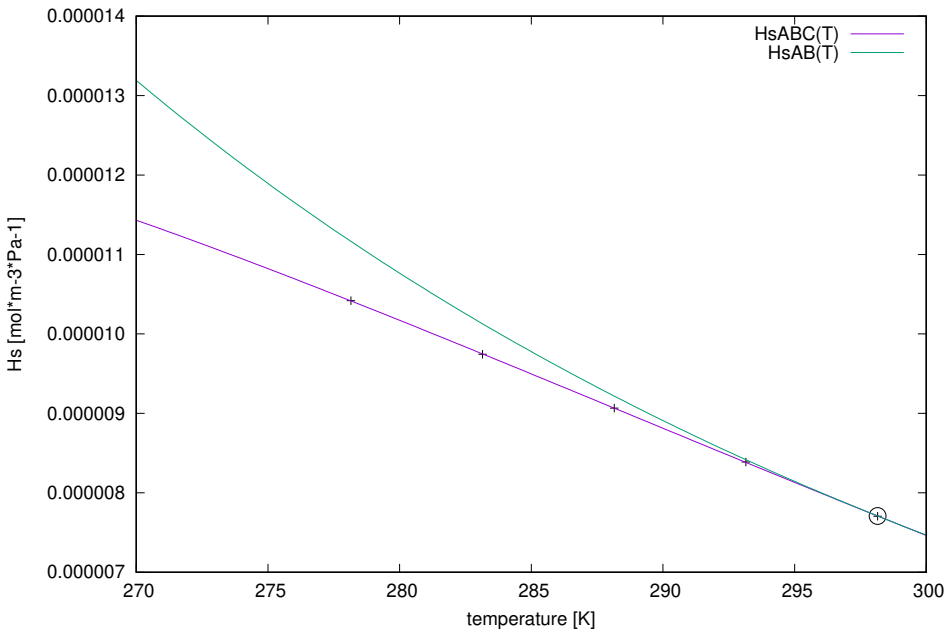

ref = 3795; chem = nitrogen; casrn = 7727-37-9; r2 = 0.99896

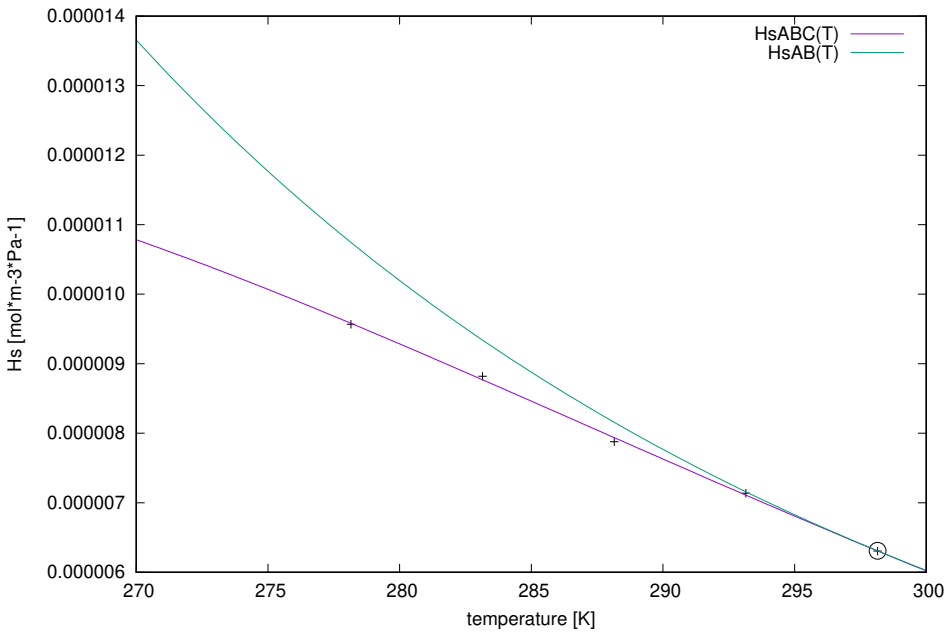

ref = 3799; chem = butane; casrn = 106-97-8; r2 = 0.98694

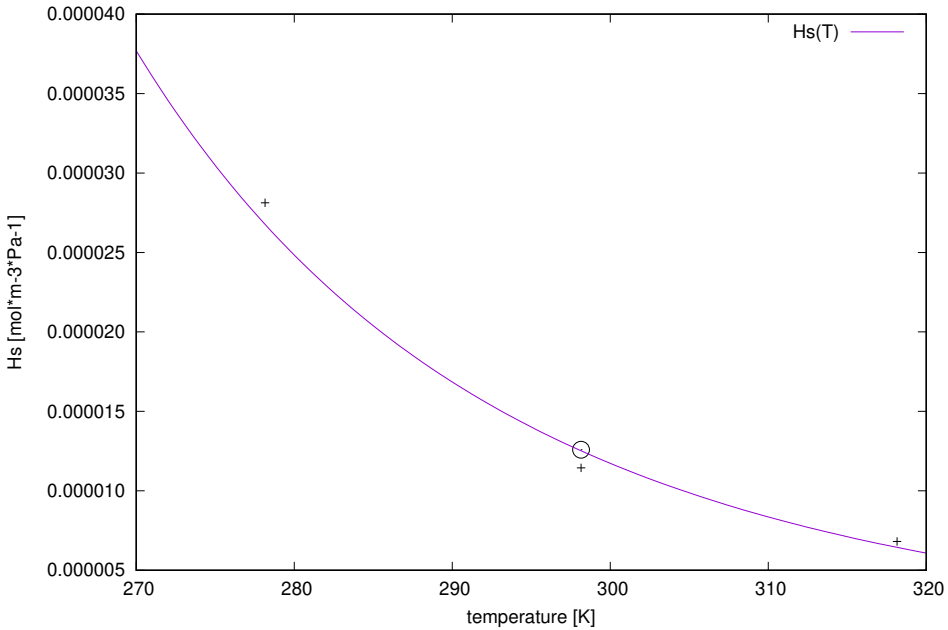



ref = 3799; chem = neopentane; casrn = 463-82-1; r2 = 0.98716

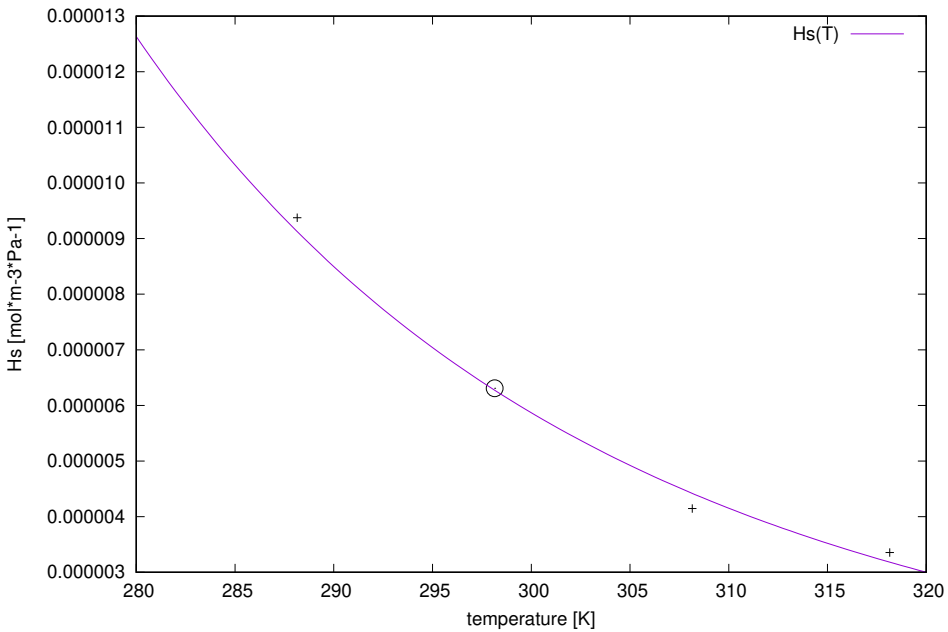

ref = 3799; chem = methane; casrn = 74-82-8; r2 = 0.99137

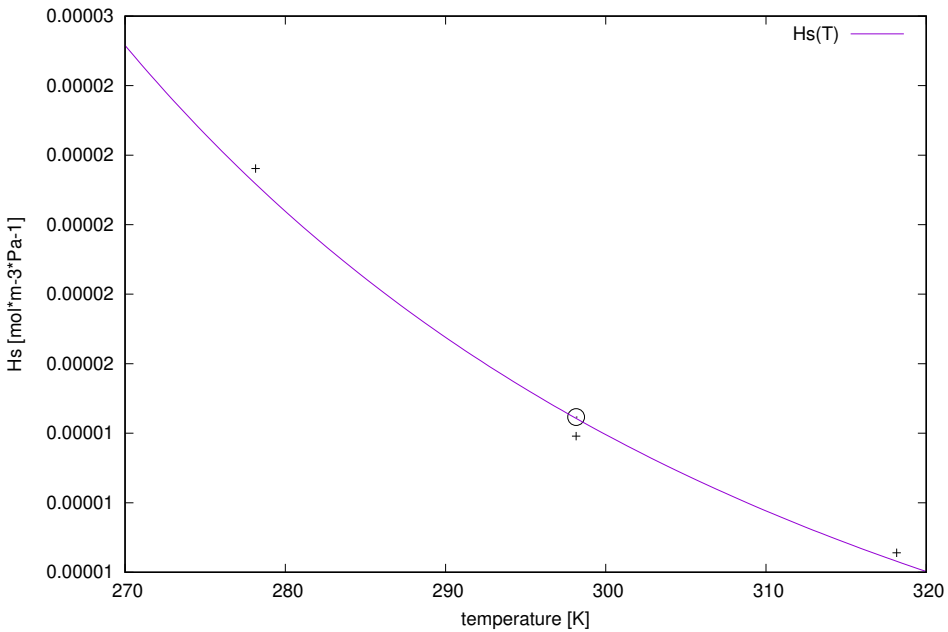

ref = 3799; chem = ethane; casrn = 74-84-0; r2 = 0.98903

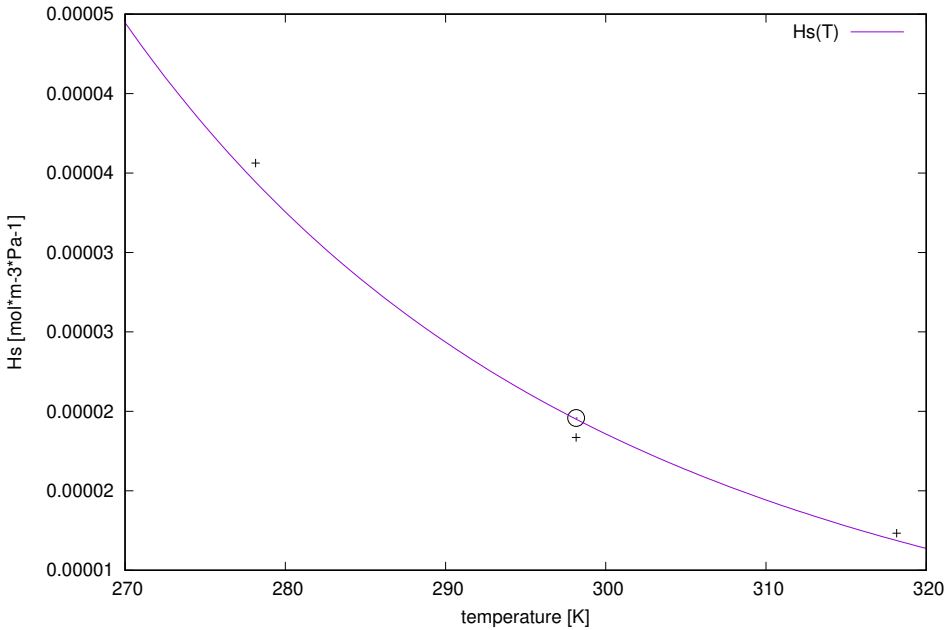

ref = 3799; chem = propane; casrn = 74-98-6; r2 = 0.98666

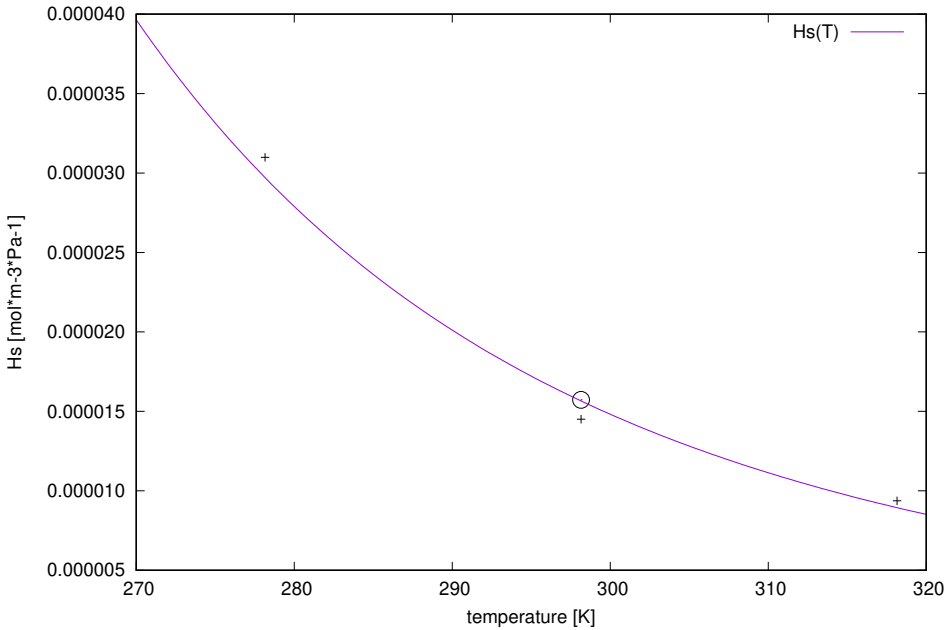

ref = 3799; chem = isobutane; casrn = 75-28-5; r2 = 0.99266

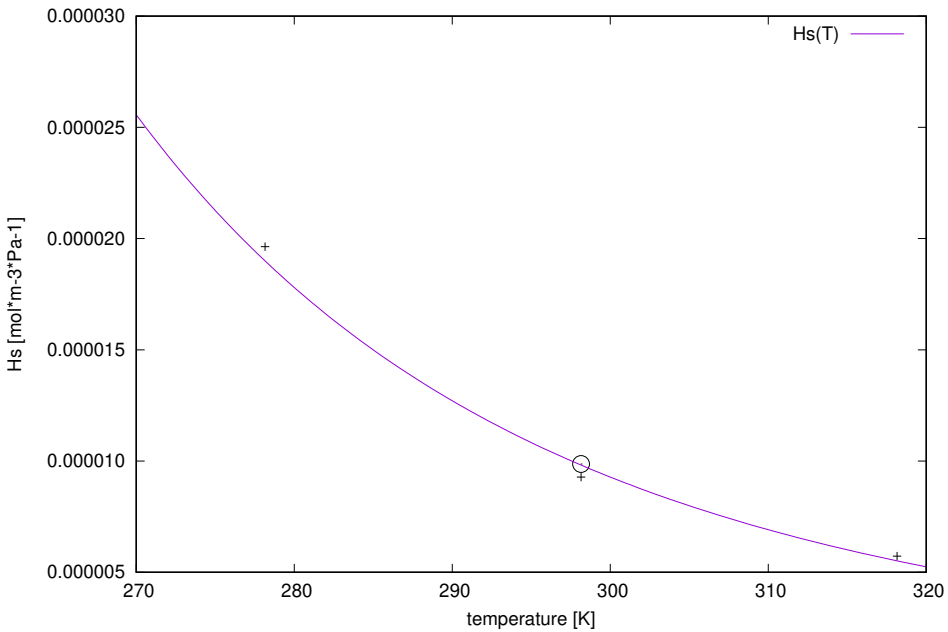

ref = 3799; chem = skatole; casrn = 83-34-1; r2 = 0.92332

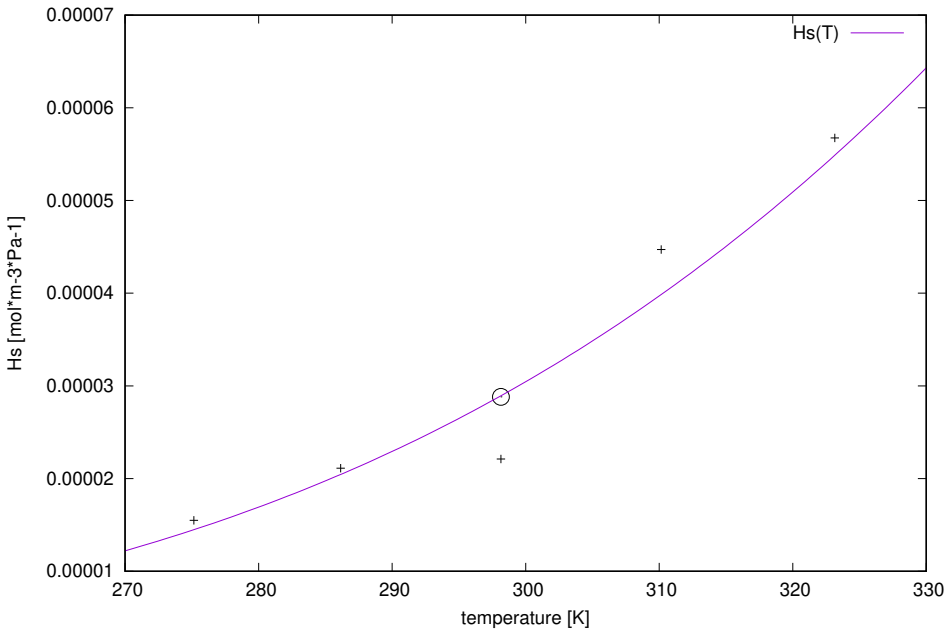

ref = 3801; chem = SF6; casrn = 2551-62-4; r2 = 0.99717

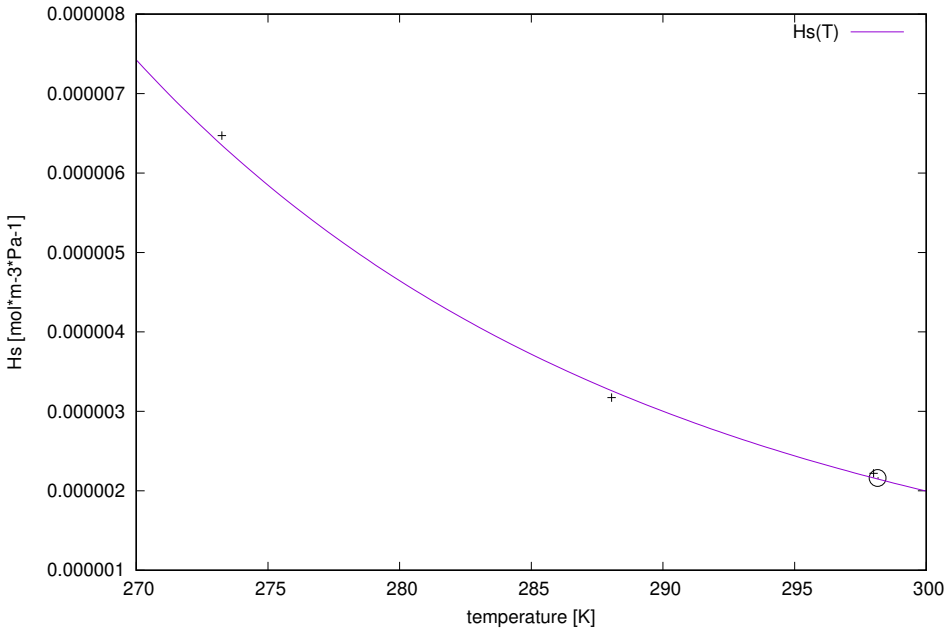

ref = 3801; chem = argon; casrn = 7440-37-1; r2 = 1.00000

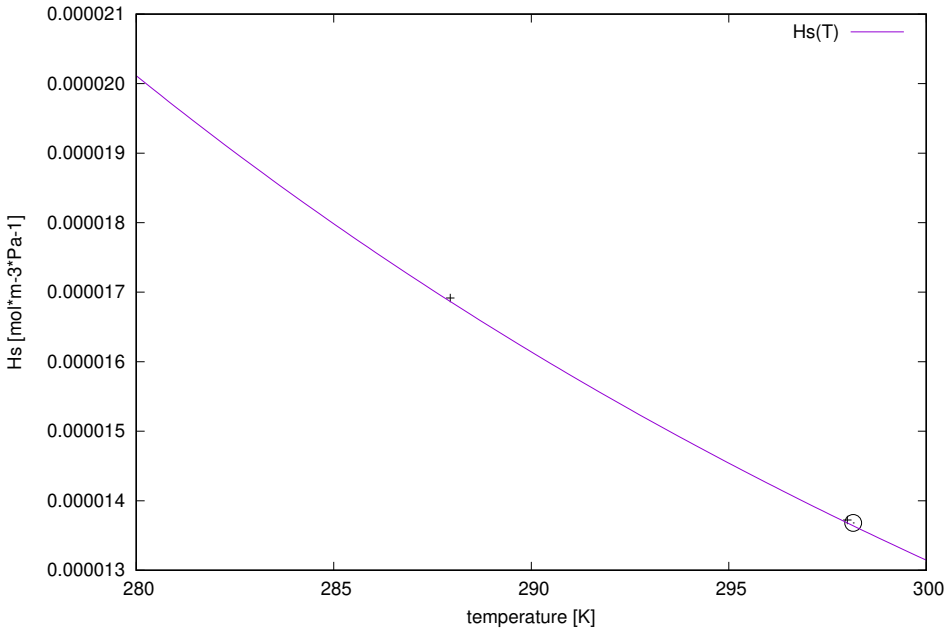



ref = 3806; chem = dinitrogen tetrafluoride; casrn = 10036-47-2; r2 = 0.99807

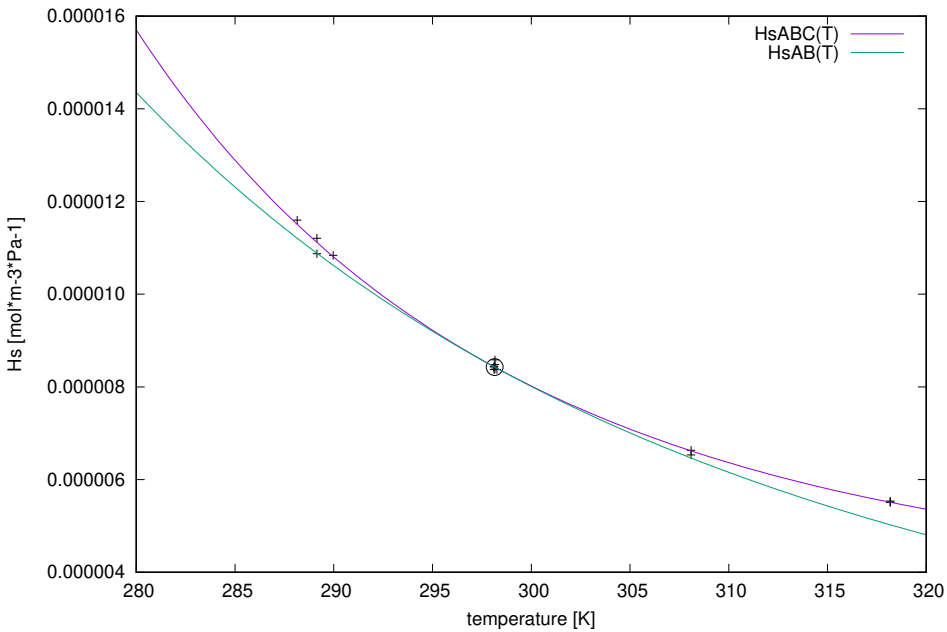

ref = 3806; chem = nitrogen trifluoride; casrn = 7783-54-2; r2 = 0.99168

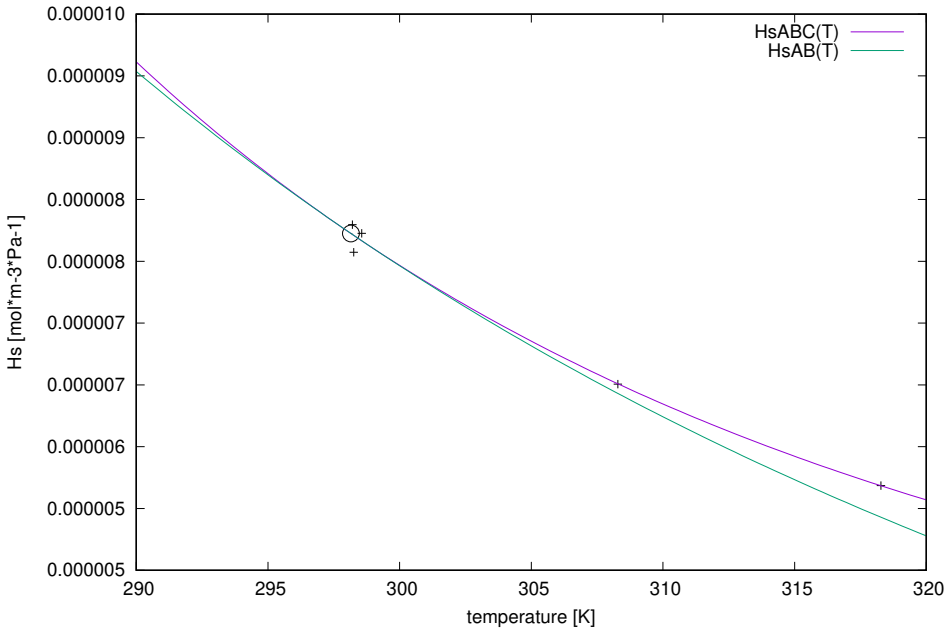

ref = 3808; chem = selenium hydride; casrn = 7783-07-5; r2 = 0.99630

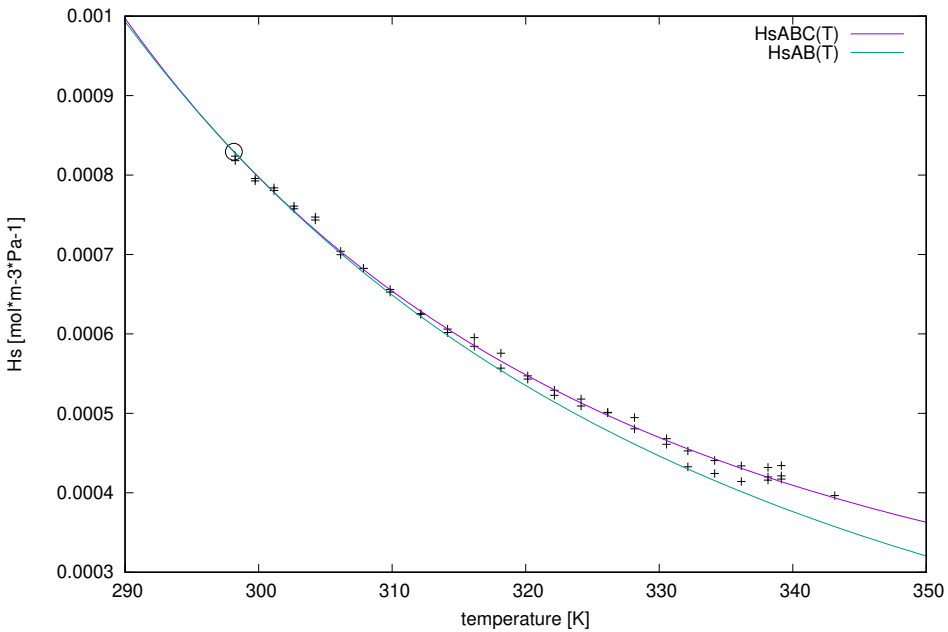

ref = 3809; chem = hypochlorous acid; casrn = 7790-92-3; r2 = 1.00000

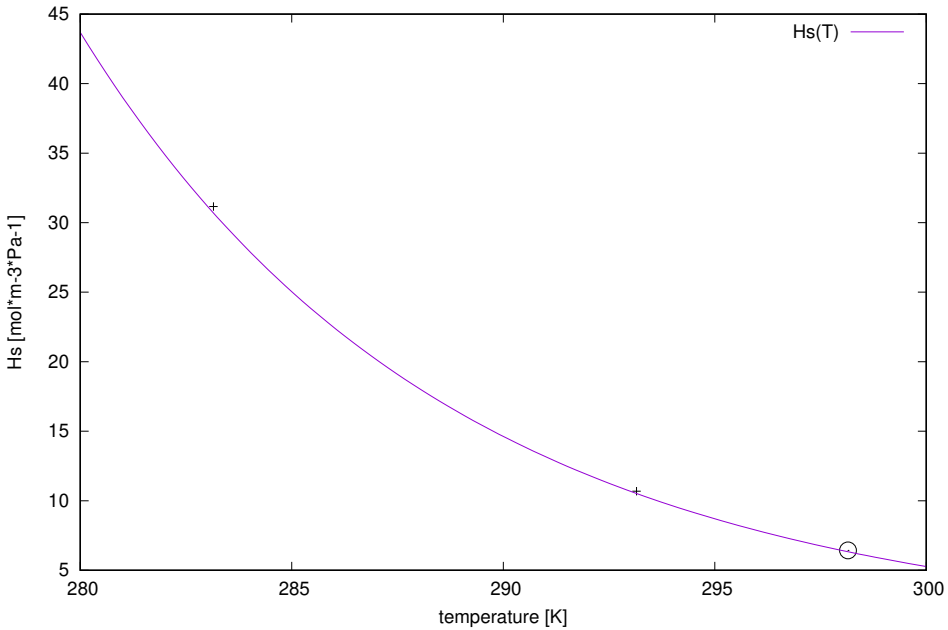

ref = 3917; chem = D2S; casrn = 13536-94-2; r2 = 0.99998

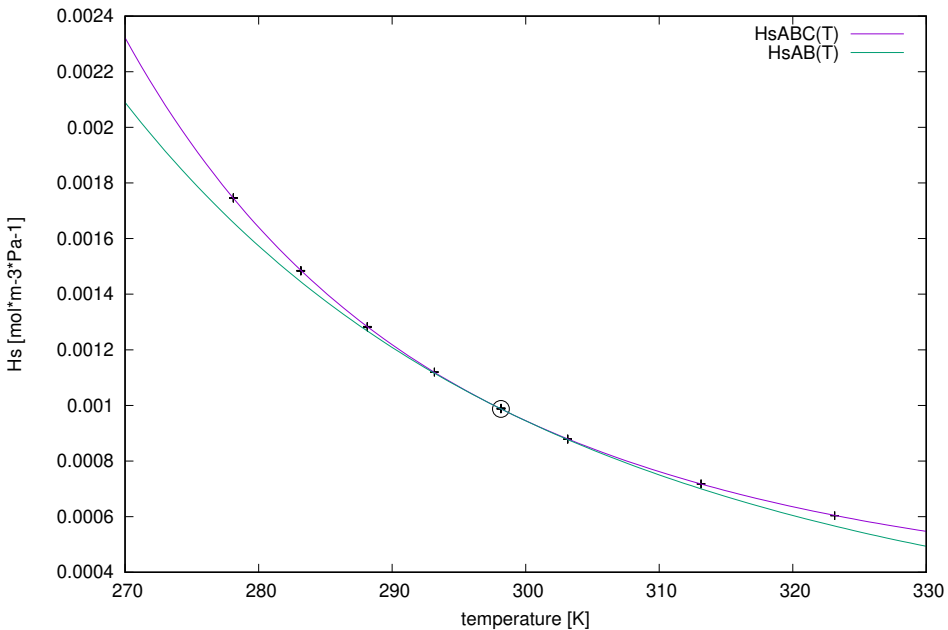

ref = 3917; chem = H2S; casrn = 7783-06-4; r2 = 0.99999

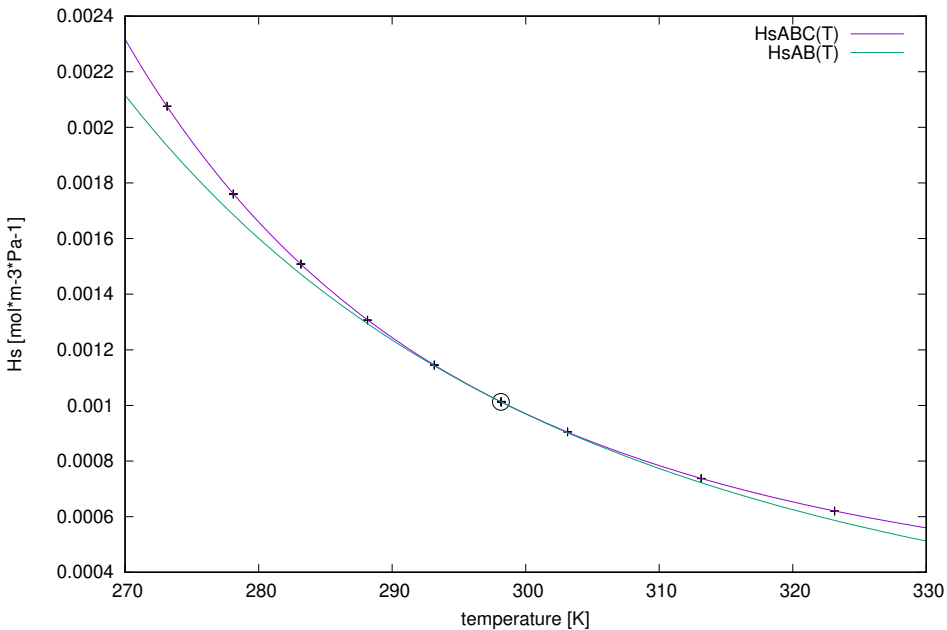

ref = 3926; chem = D2; casrn = 7782-39-0; r2 = 0.99746

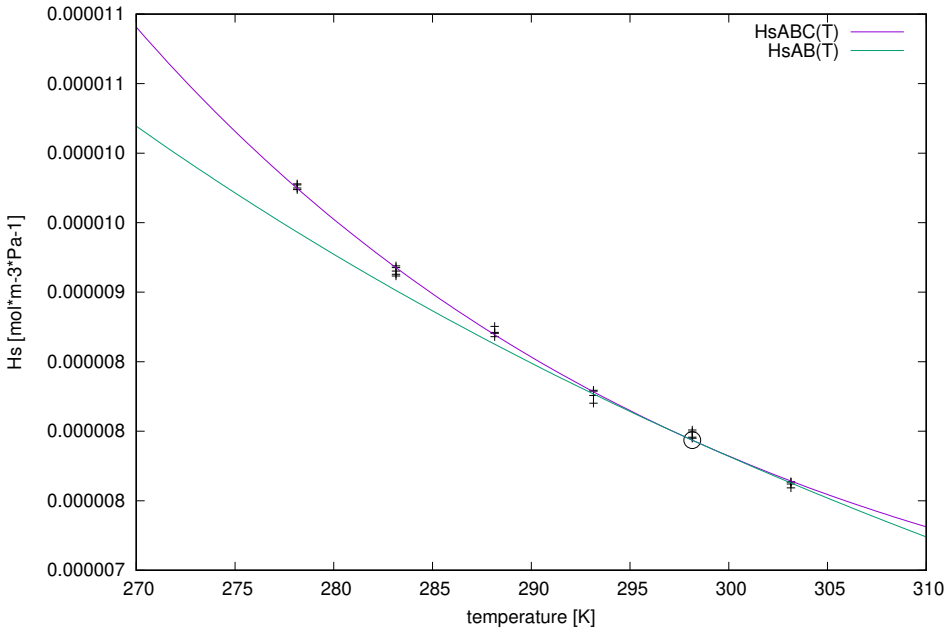

ref = 3933; chem = SO<sub>2</sub>; casrn = 7446-09-5; r<sub>2</sub> = 0.99911

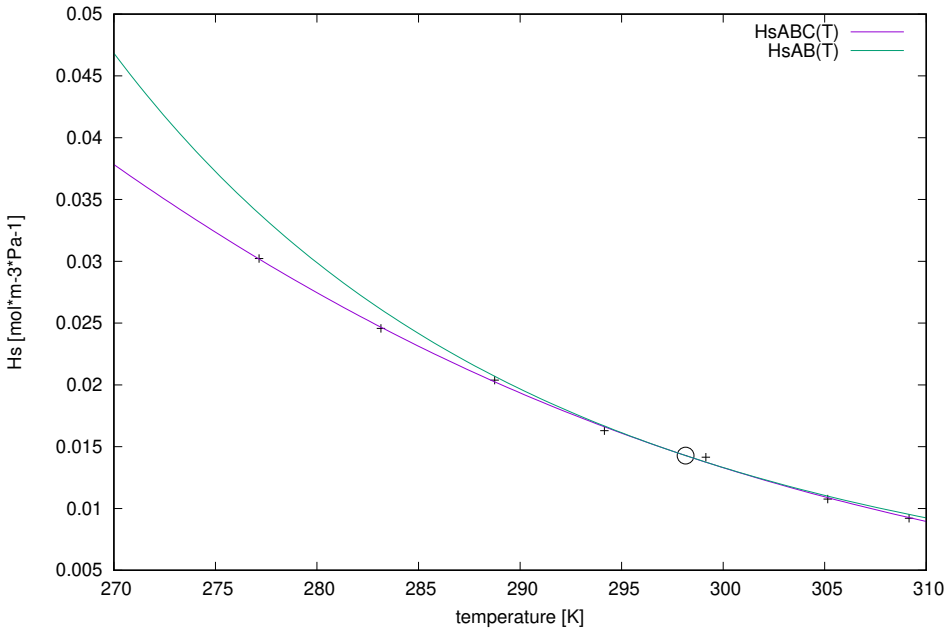



ref = 3933; chem = H2S; casrn = 7783-06-4; r2 = 0.99809

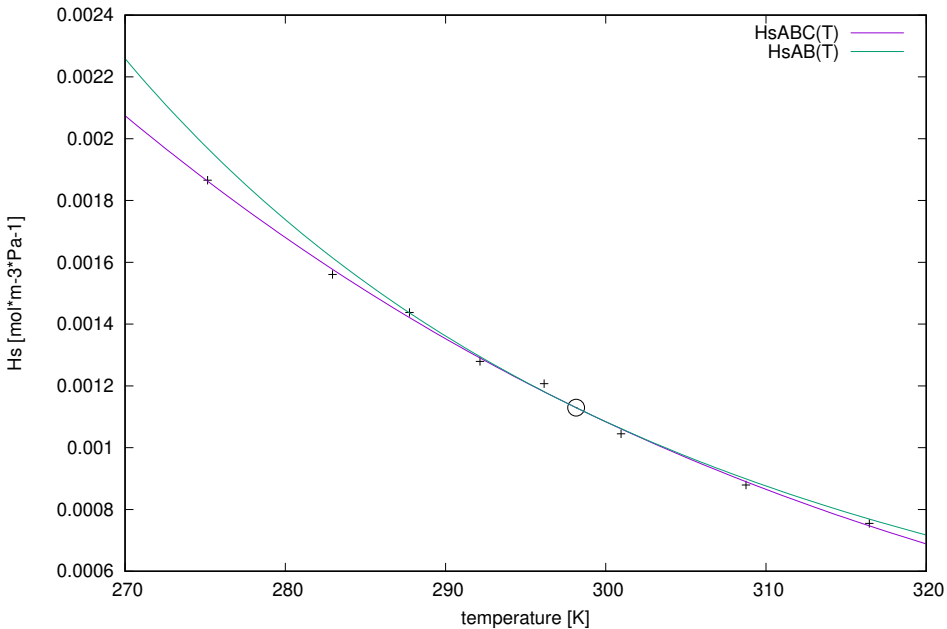

ref = 3937; chem = chlorine (molecular); casrn = 7782-50-5; r2 = 0.99977

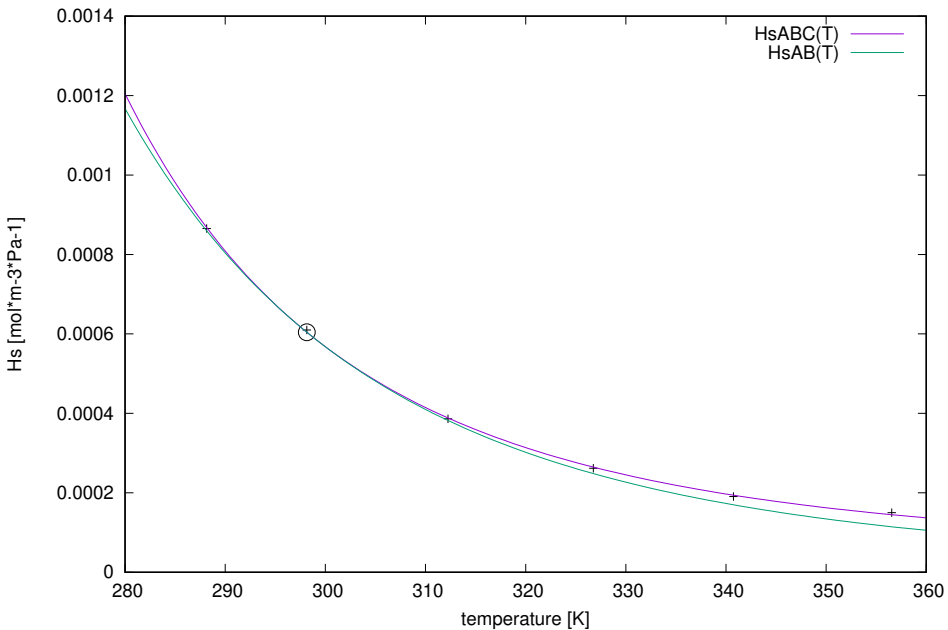

ref = 3938; chem = chlorine (molecular); casrn = 7782-50-5; r2 = 0.99317

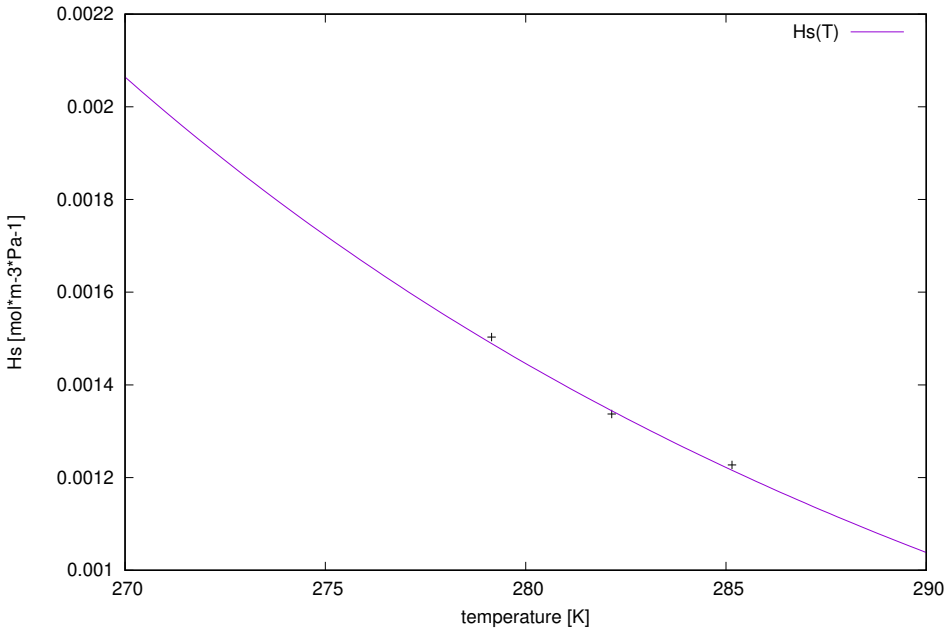

ref = 3939; chem = 6:2 FTO; casrn = 25291-17-2; r2 = 0.99152

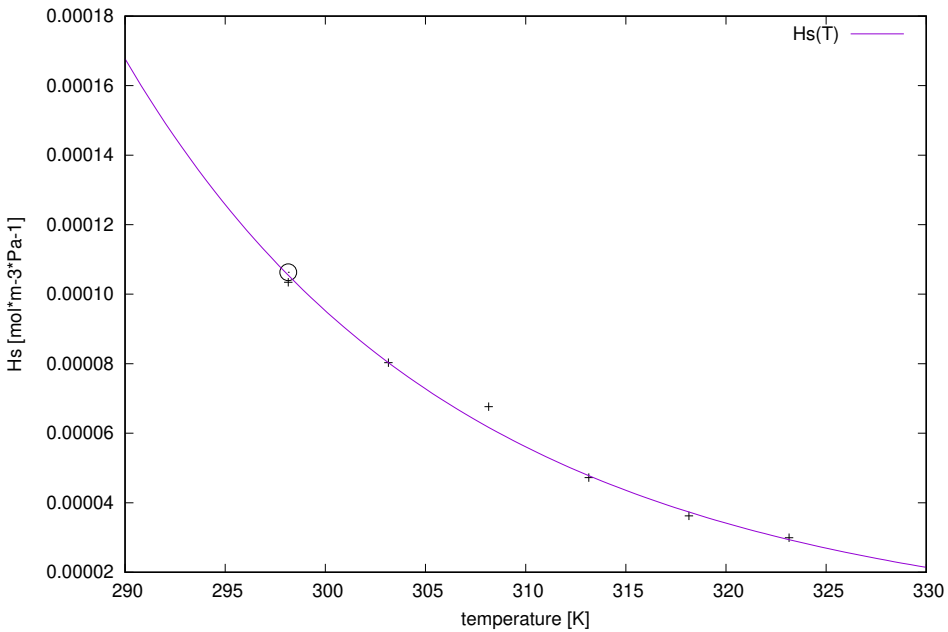

ref = 3939; chem = 6:2 FTS; casrn = 27619-97-2; r2 = 0.97341

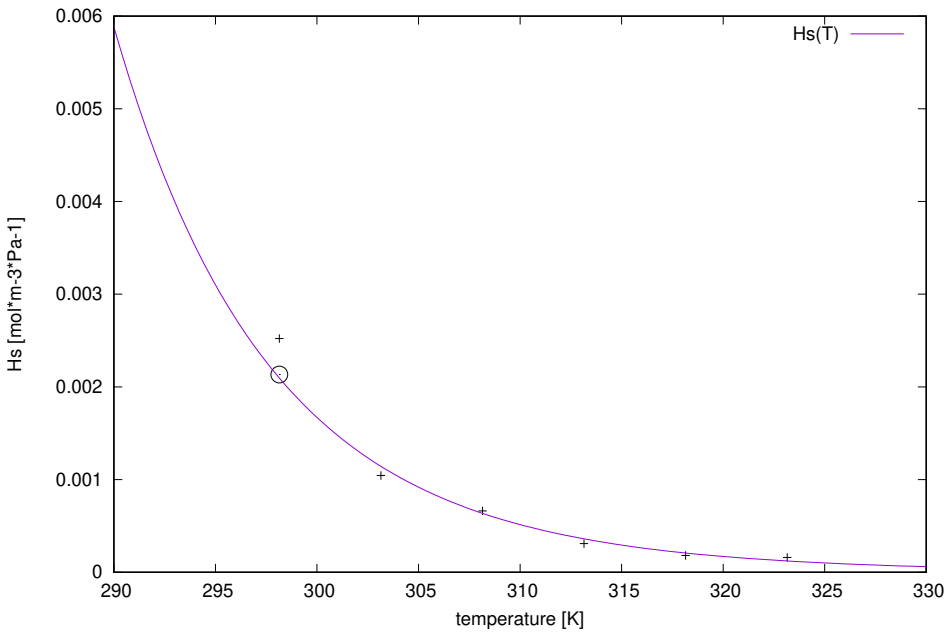

ref = 3939; chem = PFHxl; casrn = 355-43-1; r2 = 0.98802

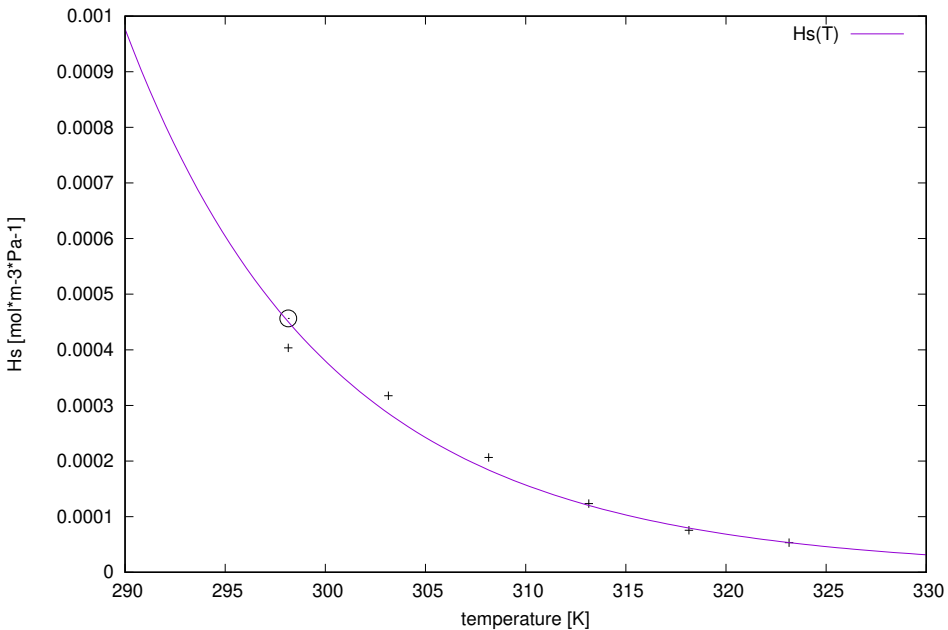

ref = 3939; chem = 6:2 FTOH; casrn = 647-42-7; r2 = 0.99571

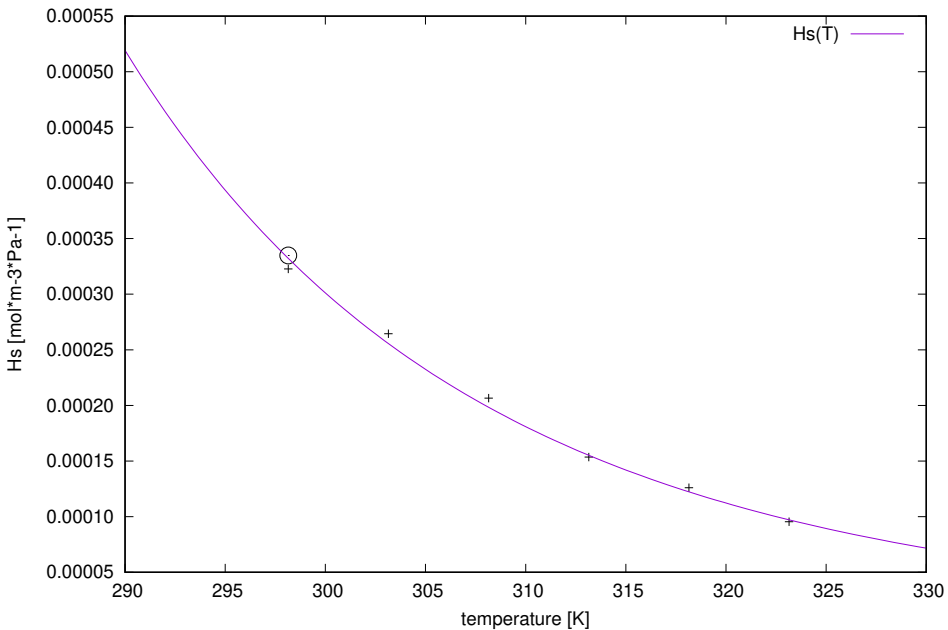

ref = 3944; chem = dinitrogen monoxide; casrn = 10024-97-2; r2 = 0.99983

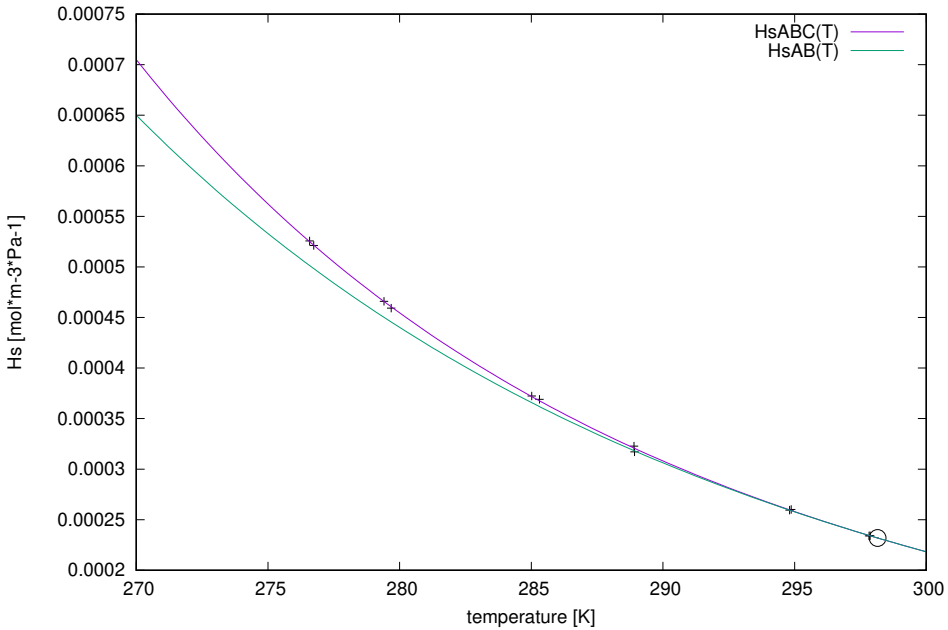



ref = 3947; chem = metolachlor; casrn = 51218-45-2; r2 = 0.98419

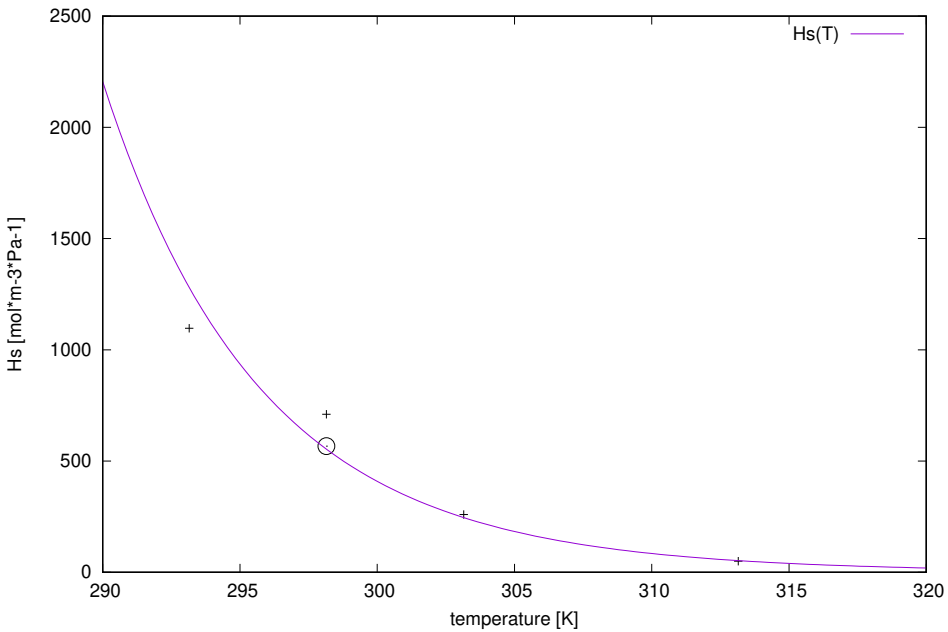

ref = 3956; chem = chlorine dioxide; casrn = 10049-04-4; r2 = 0.99941

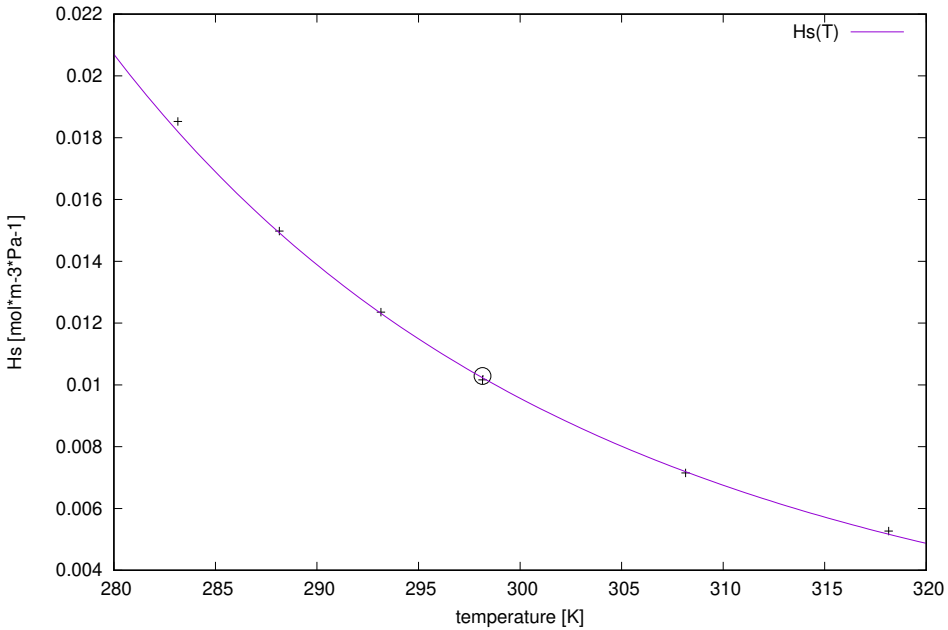

ref = 3957; chem = hypochlorous acid; casrn = 7790-92-3; r2 = 0.98950

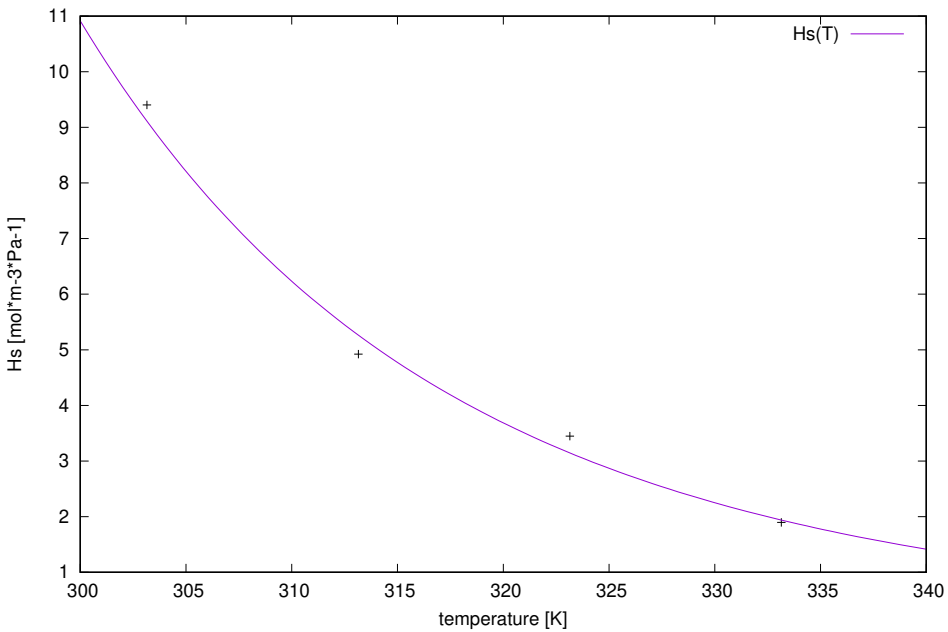

ref = 3965; chem = chlorine dioxide; casrn = 10049-04-4; r2 = 0.99984

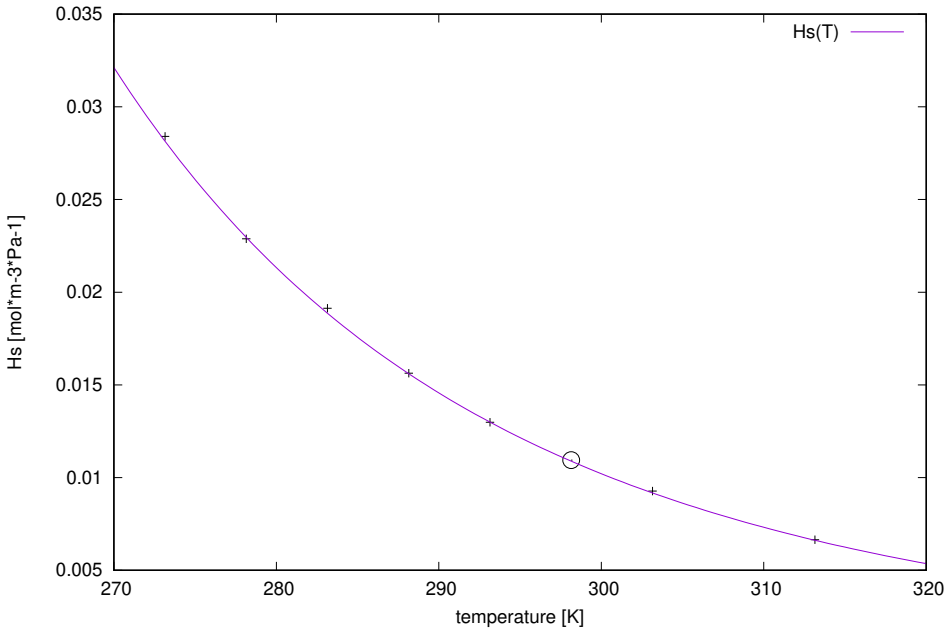

ref = 3967; chem = chlorine dioxide; casrn = 10049-04-4; r2 = 1.00000

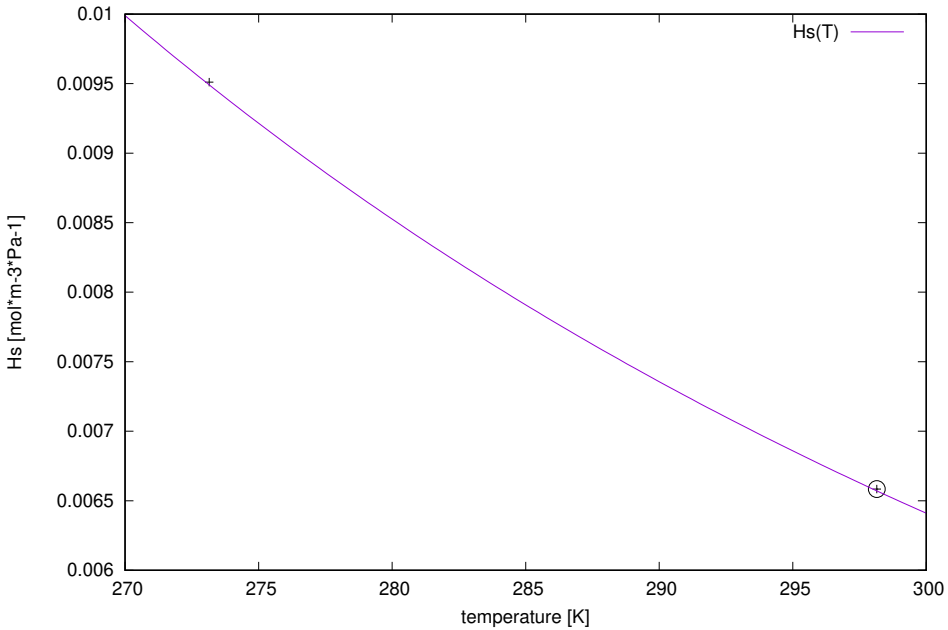

ref = 3969; chem = chlorine dioxide; casrn = 10049-04-4; r2 = 0.99787

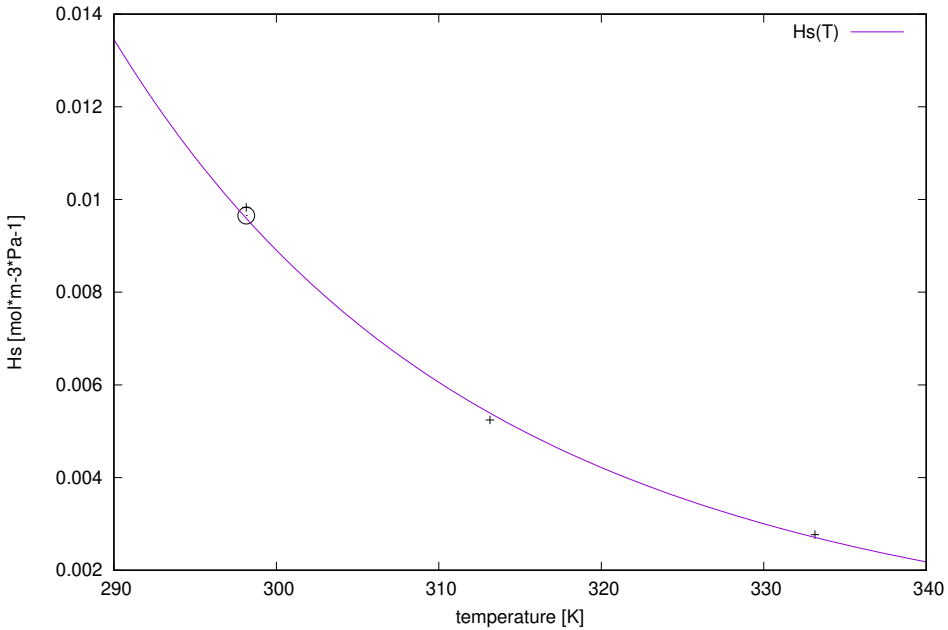

ref = this; chem = dichlorine monoxide; casrn = 7791-21-1; r2 = 0.99950

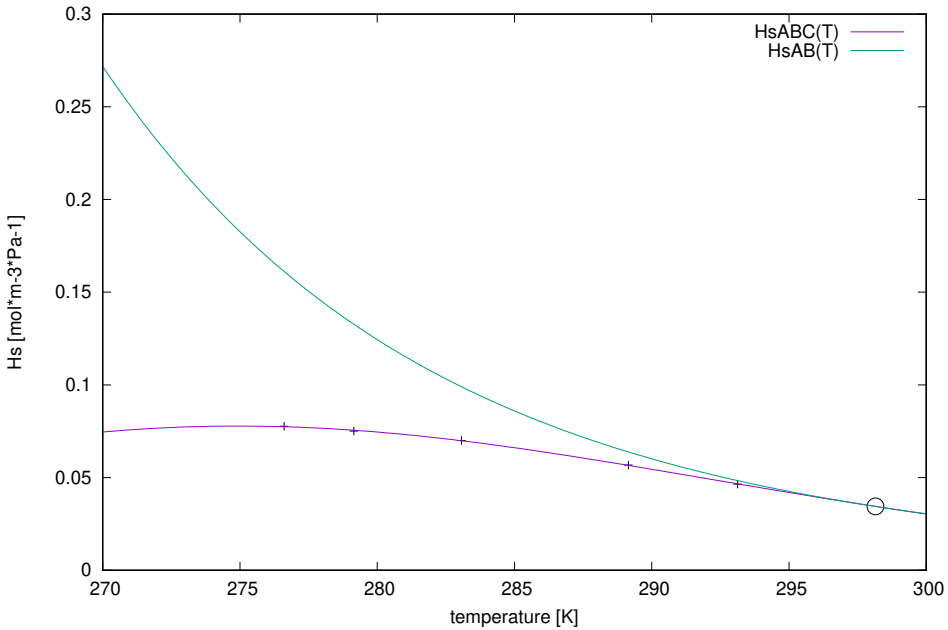

ref = this; chem = dichlorine monoxide; casrn = 7791-21-1; r2 = 1.00000

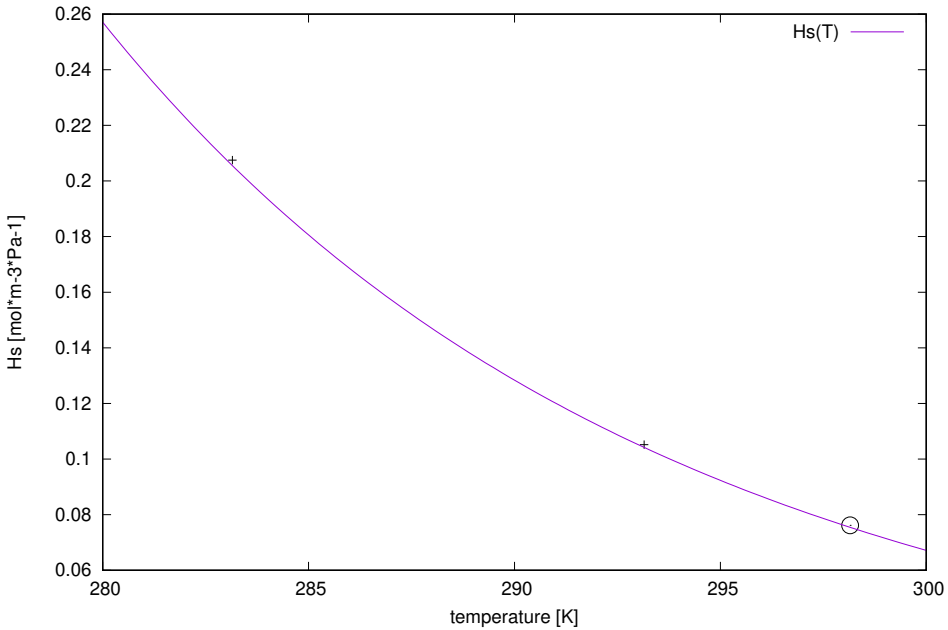

Supplement: Supplementary file 1 [file egusphere-2023-1584-supplement.zip]
